# Supplementary material for: Association of T2/S-RNase With Self-Incompatibility of Japanese Citrus Accessions Examined by Transcriptomic, Phylogenetic, and Genetic Approaches
Source: Front Plant Sci. 2021 Feb 12;12:638321. doi: 10.3389/fpls.2021.638321 (PMC7909312; doi:10.3389/fpls.2021.638321)
Supplement: Supplementary file 2 [file Table_1.XLSX]

## Sheet: Table S1
Table S1. List for of T2 RNases used in the phylogenetic analysis.
	Name or ID	Description	Accession number in DDBJ/EMBL/GenBank or ID in public databases
T2 RNases in angiosperms from public database
1	Prunus avium non-S RNase	Prunus avium PA1 mRNA for non-S RNase, complete cds	AB096918
2	Luffa aegyptiaca RNase LC1	Luffa cylindrica mRNA for ribonuclease (RNase LC1), complete cds	D64011
3	Luffa aegyptiaca RNase LC2	Luffa cylindrica mRNA for ribonuclease (RNase LC2), complete cds	D64012
4	Nicotiana alata RNase NE	Nicotiana alata RNase NE mRNA, complete cds	U13256
5	Nicotiana glutinosa RNase NGR2	Nicotiana glutinosa NGR2 mRNA for RNase NGR2, complete cds	AB032256
6	Nicotiana glutinosa RNase NGR3	Nicotiana glutinosa NGR3 mRNA for RNase NGR3, complete cds	AB032257
7	Prunus dulcis S-like ribonuclease PD1	Prunus dulcis S-like ribonuclease (PD1) mRNA, complete cds	AF227522
8	Arabidopsis thaliana RNS1	Arabidopsis thaliana ribonuclease (RNS1) mRNA, complete cds	U05206
9	Arabidopsis thaliana RNS2	Arabidopsis thaliana ribonuclease (RNS2) mRNA, complete cds	M98336
10	Arabidopsis thaliana RNS3	Arabidopsis thaliana Columbia ribonuclease (RNS3) mRNA, complete cds	U05207
11	Zinnia violacea Ribonuclease	Zinnia elegans ribonuclease mRNA, complete cds	U19923
12	Zinnia violacea Wounding-induced ribonuclease	Zinnia elegans wounding-induced ribonuclease mRNA, complete cds	U19924
13	Prunus avium S1-RNase	Prunus avium mRNA for S1-RNase, complete cds	AB028153
14	Prunus avium S3-RNase	Prunus avium mRNA for S3-RNase, complete cds	AB010306
15	Prunus avium S4-RNase	Prunus avium mRNA for S4-RNase, complete cds	AB028154
16	Prunus avium S6-RNase	Prunus avium mRNA for S6-RNase, complete cds	AB010305
17	Prunus dulcis Sa-RNase	Prunus dulcis mRNA for Sa-RNase, complete cds	AB026836
18	Prunus dulcis Sc-RNase	Prunus dulcis mRNA for Sc-RNase, complete cds	AB011470
19	Pyrus pyrifolia S4-RNase	Pyrus pyrifolia gene for S4-RNase, complete cds	AB009385
20	Pyrus pyrifolia S5-RNase	Pyrus serotina mRNA for S5-RNase, complete cds	D88282
21	Pyrus pyrifolia S6-RNase	Pyrus pyrifolia mRNA for S6-RNase, complete cds	AB002142
22	Malus × domestica S2-RNase	Malus domestica S2-RNase (S) mRNA, complete cds	U12199
23	Malus × domestica Sc-RNase	Malus x domestica S mRNA for Sc-RNase precursor, complete cds	D50836
24	Malus × domestica Sf-RNase	Malus x domestica S mRNA for Sf-RNase precursor, complete cds	D50837
25	Nicotiana alata S2-RNase	Nicotiana alata S2-RNase gene, complete cds	U08860
26	Nicotiana alata S6-RNase	Nicotiana alata S6-RNase gene, complete cds	U08861
27	Solanum peruvianum S-RNase S3	L.peruvianum mRNA for S-RNase S3	X76065
28	Solanum chacoense S-RNase	Solanum chacoense self-incompatibility ribonuclease (S) mRNA, S-12 allele, complete cds	AF176533
29	Solanum tuberosum S2 RNase	S. tuberosum S2 (self-incompatibility) locus linked stylar RNase gene	X62727
30	Antirrhinum hispanicum S2-RNase	A.hispanicum mRNA for S2-Rnase	X96465
31	Antirrhinum hispanicum S4-RNase	A.hispanicum mRNA for S4-Rnase	X96466
32	Citrus reticulata S-like RNase1	Citrus reticulata cultivar Wuzishatangju S-like RNase gene, complete cds	GU220072
33	Citrus reticulata S-like_RNase2	Citrus reticulata cultivar Wuzishatangju S-like RNase mRNA, complete cds	GU220071
34	Citrus maxima S-like_RNase1	Citrus maxima cultivar Shatian S-like RNase mRNA, complete cds	FJ917371
35	Citrus maxima S-like_RNase2	Citrus maxima cultivar Shatian S-like RNase gene, complete cds	GU120096
36	Petunia integrifolia subsp. inflata S1 RNase	Petunia integrifolia subsp. inflata S1 protein gene, complete cds	M67990
37	Petunia integrifolia S2 RNase	Petunia integrifolia S2 self-incompatibility ribonuclease precursor, mRNA, complete cds	AF301533
38	Lycopersicon esculentum RNase LE	Lycopersicon esculentum RNALE gene, exons 1 to 3, cultivar VFNT Cherry	Y17444
39	Lycopersicon esculentum RNase LX	L.esculentum mRNA for ribonuclease lx	X79338
40	Prunus dulcis RNase PD2	Prunus dulcis RNase PD2 (Pd2) mRNA, complete cds.	AF202030
41	Prunus salicina Sb-RNase	Prunus salicina gene for Sb-RNase, complete cds	AB252413
42	Prunus salicina Sa-RNase	Prunus salicina gene for Sa-RNase, complete cds	AB252411
43	CgRNS3	Citrus grandis T2 RNase	KX894564
44	CtRNS1	Citrus tamurana T2 RNase	LC408957
45	CtRNS2	Citrus tamurana T2 RNase	LC408958
46	CtRNS3	Citrus tamurana T2 RNase	LC408959
Genes annotated as T2 RNase in citrus genome database
47	clementine0.9_032811m	Gene annotated ribonuclease T2 in clementine	clementine0.9_032811m
48	clementine0.9_030660m	Gene annotated ribonuclease T2 in clementine	clementine0.9_030660m
49	clementine0.9_028427m	Gene annotated ribonuclease T2 in clementine	clementine0.9_028427m
50	clementine0.9_033801m	Gene annotated ribonuclease T2 in clementine	clementine0.9_033801m
51	clementine0.9_027797m	Gene annotated ribonuclease T2 in clementine	clementine0.9_027797m
52	clementine0.9_020983m	Gene annotated ribonuclease T2 in clementine	clementine0.9_020983m
53	clementine0.9_020775m	Gene annotated ribonuclease T2 in clementine	clementine0.9_020775m
54	clementine0.9_035888m	Gene annotated ribonuclease T2 in clementine	clementine0.9_035888m
55	Cs1g25360.1	Gene annotated ribonuclease T2 in sweet orange	Cs1g25360.1
56	Cs2g18380.1	Gene annotated ribonuclease T2 in sweet orange	Cs2g18380.1
57	Cs2g26130.1	Gene annotated ribonuclease T2 in sweet orange	Cs2g26130.1
58	Cs2g26150.1	Gene annotated ribonuclease T2 in sweet orange	Cs2g26150.1
59	Cs3g07430.1	Gene annotated ribonuclease T2 in sweet orange	Cs3g07430.1
60	Cs7g03760.1	Gene annotated ribonuclease T2 in sweet orange	Cs7g03760.1
61	Cs7g03770.1	Gene annotated ribonuclease T2 in sweet orange	Cs7g03770.1
62	orange1.1t03886.1	Gene annotated ribonuclease T2 in sweet orange	orange1.1t03886.1
63	orange1.1t03889.1	Gene annotated ribonuclease T2 in sweet orange	orange1.1t03889.1
64	orange1.1t03891.1	Gene annotated ribonuclease T2 in sweet orange	orange1.1t03891.1
65	Ciunshiu_m01935	Gene annotated ribonuclease T2 in satsuma mandarin	Ciunshiu_m01935
66	Ciunshiu_m01937	Gene annotated ribonuclease T2 in satsuma mandarin	Ciunshiu_m01937
67	Ciunshiu_m03511	Gene annotated ribonuclease T2 in satsuma mandarin	Ciunshiu_m03511
68	Ciunshiu_m05131	Gene annotated ribonuclease T2 in satsuma mandarin	Ciunshiu_m05131
69	Ciunshiu_m21084	Gene annotated ribonuclease T2 in satsuma mandarin	Ciunshiu_m21084
70	Ciunshiu_m21085	Gene annotated ribonuclease T2 in satsuma mandarin	Ciunshiu_m21085
71	Ci015650.1	Gene annotated ribonuclease T2 in C. ichangensis	Ci015650.1
72	Ci030280.1	Gene annotated ribonuclease T2 in C. ichangensis	Ci030280.1
73	Ci103230.1	Gene annotated ribonuclease T2 in C. ichangensis	Ci103230.1
74	Ci103230.2	Gene annotated ribonuclease T2 in C. ichangensis	Ci103230.2
75	Ci103230.3	Gene annotated ribonuclease T2 in C. ichangensis	Ci103230.3
76	Ci103230.4	Gene annotated ribonuclease T2 in C. ichangensis	Ci103230.4
77	Ci189940.1	Gene annotated ribonuclease T2 in C. ichangensis	Ci189940.1
78	Ci189950.1	Gene annotated ribonuclease T2 in C. ichangensis	Ci189950.1
79	Ci189960.1	Gene annotated ribonuclease T2 in C. ichangensis	Ci189960.1
80	Ci189970.1	Gene annotated ribonuclease T2 in C. ichangensis	Ci189970.1
81	Ci189990.1	Gene annotated ribonuclease T2 in C. ichangensis	Ci189990.1
82	Ci190030.1	Gene annotated ribonuclease T2 in C. ichangensis	Ci190030.1
83	Ci259480.1	Gene annotated ribonuclease T2 in C. ichangensis	Ci259480.1
84	Ci288540.1	Gene annotated ribonuclease T2 in C. ichangensis	Ci288540.1
85	Ci288560.1	Gene annotated ribonuclease T2 in C. ichangensis	Ci288560.1
86	Cm015510.1	Gene annotated ribonuclease T2 in C. medica	Cm015510.1
87	Cm042950.1	Gene annotated ribonuclease T2 in C. medica	Cm042950.1
88	Cm042950.2	Gene annotated ribonuclease T2 in C. medica	Cm042950.2
89	Cm042950.3	Gene annotated ribonuclease T2 in C. medica	Cm042950.3
90	Cm079980.1	Gene annotated ribonuclease T2 in C. medica	Cm079980.1
91	Cm116220.1	Gene annotated ribonuclease T2 in C. medica	Cm116220.1
92	Cm116230.1	Gene annotated ribonuclease T2 in C. medica	Cm116230.1
93	Cm287190.1	Gene annotated ribonuclease T2 in C. medica	Cm287190.1
94	Cg1g001950.1	Gene annotated ribonuclease T2 in C. grandis	Cg1g001950.1
95	Cg4g005350.1	Gene annotated ribonuclease T2 in C. grandis	Cg4g005350.1
96	Cg2g027520.1	Gene annotated ribonuclease T2 in C. grandis	Cg2g027520.1
97	Cg2g027520.2	Gene annotated ribonuclease T2 in C. grandis	Cg2g027520.2
98	Cg3g001890.1	Gene annotated ribonuclease T2 in C. grandis	Cg3g001890.1
99	Cg3g001870.1	Gene annotated ribonuclease T2 in C. grandis	Cg3g001870.1
100	Cg7g021190.1	Gene annotated ribonuclease T2 in C. grandis	Cg7g021190.1
101	Cg7g021200.1	Gene annotated ribonuclease T2 in C. grandis	Cg7g021200.1
102	MSYJ179040.1	Gene annotated ribonuclease T2 in C. reticulata	MSYJ179040.1
103	MSYJ006410.1	Gene annotated ribonuclease T2 in C. reticulata	MSYJ006410.1
104	MSYJ056120.1	Gene annotated ribonuclease T2 in C. reticulata	MSYJ056120.1
105	MSYJ165010.1	Gene annotated ribonuclease T2 in C. reticulata	MSYJ165010.1
106	MSYJ006420.1	Gene annotated ribonuclease T2 in C. reticulata	MSYJ006420.1
107	MSYJ160600.1	Gene annotated ribonuclease T2 in C. reticulata	MSYJ160600.1
108	sb10407.1	Gene annotated ribonuclease T2 in A. Buxifolia	sb10407.1
109	sb14994.1	Gene annotated ribonuclease T2 in A. Buxifolia	sb14994.1
110	sb15464.1	Gene annotated ribonuclease T2 in A. Buxifolia	sb15464.1
111	sb15910.1	Gene annotated ribonuclease T2 in A. Buxifolia	sb15910.1
112	sb18633.1	Gene annotated ribonuclease T2 in A. Buxifolia	sb18633.1
113	sb18719.1	Gene annotated ribonuclease T2 in A. Buxifolia	sb18719.1
114	sb23076.1	Gene annotated ribonuclease T2 in A. Buxifolia	sb23076.1
115	sb25718.1	Gene annotated ribonuclease T2 in A. Buxifolia	sb25718.1
116	sb25768.1	Gene annotated ribonuclease T2 in A. Buxifolia	sb25768.1
117	sb25924.1	Gene annotated ribonuclease T2 in A. Buxifolia	sb25924.1
118	sb25942.1	Gene annotated ribonuclease T2 in A. Buxifolia	sb25942.1
119	sb31981.1	Gene annotated ribonuclease T2 in A. Buxifolia	sb31981.1
120	sb37098.1	Gene annotated ribonuclease T2 in A. Buxifolia	sb37098.1
121	sb37098.2	Gene annotated ribonuclease T2 in A. Buxifolia	sb37098.2
122	sb38290.1	Gene annotated ribonuclease T2 in A. Buxifolia	sb38290.1
T2 RNases in Bryophyta (Outgroup for phylogenetic anaylsis)
123	Physcomitrella patens T2 RNase	Gene annotated ribonuclease T2 in Physcomitrella patens	Pp3c2_17290V3.1

## Sheet: Table S2
Table S2. Primers used in this study.
Primer name	Sequence (5' - 3')	Target
Primers for qPCR
HYRNS7198qF	GGCACTTGCTCTGAGTCTGT	HY7198
HYRNS7198qR	CTCCCGTCAGGCACTATTCC	HY7198
HYRNS8523qF	CTGGCCAAGTCTTACCCGAG	HY8523
HYRNS8523qR	AAAATATTCCTCGGGCGGCA	HY8523
HYRNS9350qF	GAAAATGCGCTCGAGGTTCG	HY9350
HYRNS9350qR	AATGGTGCTGCCTGTTTTGC	HY9350
HYRNS11404qF	GCTCTGGAGAAGTACTGGCC	HY11404
HYRNS11404qR	AGCCCAAAATAGCCCTTCCC	HY11404
HYRNS11692qF	TCCACACGAGCCCCTAGATT	HY11692
HYRNS11692qR	CACCTCCGGCTTTCAGTGTA	HY11692
HYRNS15217qF	CTGGACACACGAATGGGTGA	HY15217
HYRNS15217qR	AGAGCTTGGAGGAGGTTTGC	HY15217
HYRNS16290qF	TTCATCCAGCCACGCGATTA	HY16290
HYRNS16290qR	TTGTAACTGCCACCGTCTGG	HY16290
ActinqF	ACTGGAATGGTGAAGGCTGG	Actin
ActinqR	GTGTCGAGGCCTACCAACAA	Actin
Primers for RT-PCR in different tissues
HYSISCst_DN11404-93F	CGTCGTTTTGCCAGCTCAAA	HY11404
HYSISCst_DN11404-467R	AGCCCTTCCCCACTATAGCA	HY11404
HYSISCst_DN15217-261F	CGGCAGCTGATTTTGGCATT	HY15217
HYSISCst_DN15217-586R	GAGCTTGGAGGAGGTTTGCT	HY15217
HYSISCst_DN7198-381F	GCATGCAAAAGAACTGGCCA	HY7198
HYSISCst_DN7198-811R	CTGATAAAGCTGGCCGTTGC	HY7198
HYSISCst_DN9350-31F	TGAAGAATAAGGCGATTTACCTC	HY9350
HYSISCst_DN9350-268R	AGCGATGAAAGAATGGTGCT	HY9350
HYSISCst_DN8523-420F	TAAATCTTTTGCTGCCGAGA	HY8523
HYSISCst_DN8523-733R	GTCACCTCCATTAGGAGAGACG	HY8523
G1_RT_F	TGGCTATTGCTTGCAGGCAAACT	HY16290
G1_RT_R	CCGCTCTACTTAAATTGTTTTC	HY16290
G3_RT_F	CCTACCCCTGCAAATATAAGCC	HY11692
G3_RT_R	GGACCCAAAATAATTCAGTGT	HY11692
ActinF	CACACTGGAGTCATGGTTGG	Actin
ActinR	CTTCTCTCTGTTGGCCTTGG	Actin
Primers for Sanger sequencing
HYSISCst_DN9350_c0_g2_i1_31_F	TGAAGAATAAGGCGATTTACCTC	HY9350
HYSISCst_DN9350_c0_g2_i1_420_F	CGAAGGGCTGTCGATCTAAC	HY9350
HYSISCst_DN9350_c0_g2_i1_268_R	AGCGATGAAAGAATGGTGCT	HY9350
HYSISCst_DN9350_c0_g2_i1_776_R	ACCCCAAGGTGTGATGATCC	HY9350
HYSISCst_DN9350_c0_g2_i1_881_R	TTGGACAAAAAGCACAACAGC	HY9350
HYSISCst_DN8523_c0_g1_i1_53_F	CATGCACCCATCTTCCTTTT	HY8523
HYSISCst_DN8523_c0_g1_i1_420_F	TAAATCTTTTGCTGCCGAGA	HY8523
HYSISCst_DN8523_c0_g1_i1_266_R	GGCCACGTCTGGACTAGAAA	HY8523
HYSISCst_DN8523_c0_g1_i1_733_R	GTCACCTCCATTAGGAGAGACG	HY8523
HYSISCst_DN8523_c0_g1_i1_1247_R	GATTTTGCCAGACCACATCC	HY8523
HYSISCst_DN8523_c0_g1_i1_1358_R	CCAGGGTGATATATGCTTGGA	HY8523
G1&2_ContigF	GTTGGATCCACTACATATATG	HY16290
G1_ContigR	GAAAATCGGAATAATTGATGG	HY16290
HY_Sty_RNase_G1_RACE_F	TCGGAAAGATTTGATGTGCTATT	HY16290
HY_Sty_RNase_G1_RACE_R	CCGCTCTACTTAAATTGTTTTC	HY16290
G1&2_ContigORF_F	ATGAAGATCAAGGCGTCTTGC	HY16290
G1_ContigORF_R	TTAATTAGTTCGGGGAGGAACG	HY16290
G3_ContigF	ATATAACTTTGATATAAGAG	HY11692
G3_ContigR	CTTTATTCAGCGTACCTCTTAGC	HY11692
HY_Sty_RNase_G3_RACE_F	ATAAGCCAGGAGTCTTCGTTCTT	HY11692
HY_Sty_RNase_G3_RACE_R	ACGAAGGAGACTTTTCCAGTACC	HY11692
G3_ContigORF_F	ATGAAGGTGGCATCCATCAAC	HY11692
G3_ContigORF_R	CTACCACCGTGGTGGGAAAAT	HY11692
TBNst_DN21745_c0_g1_i1_40_F	TTTCACCACTATTGGCTGGTC	TBN21745
TBNst_DN21745_c0_g1_i1_288_F	TGGAAACATGAGTGGGATGA	TBN21745
TBNst_DN21745_c0_g1_i1_142_R	ACTGGCCAGAGACCGTGTAG	TBN21745
TBNst_DN21745_c0_g1_i1_644_R	TTCTGTTCTGAAGGCATTGCT	TBN21745
TBNst_DN21745_c0_g1_i1_644_R	TTCTGTTCTGAAGGCATTGCT	TBN21745
TBNst_DN10176_c0_g1_i1_40_F	CACACAATTGCAAACATAGGC	TBN10176
TBNst_DN10176_c0_g1_i1_380_F	TTTGGAAAGATCAGTGGTTCG	TBN10176
TBNst_DN10176_c0_g1_i1_241_R	CAGAGGCCATGTATGACGAA	TBN10176
TBNst_DN10176_c0_g1_i1_716_R	AATATCCGGCCCACAGTTTT	TBN10176
TBNst_DN10176_c0_g1_i1_818_R	ATACTCGTGTAGAGTTGTCACTGGAT	TBN10176
SWSst_DN3273_c0_g1_i1_23_F	TCTTCCGATCTCTTTACCGAAC	SWS3273
SWSst_DN3273_c0_g1_i1_400_F	TCTTTCCACAAGGGATGATGA	SWS3273
SWSst_DN3273_c0_g1_i1_893_F	GCAGGTTCGAATTCTATTTGCT	SWS3273
SWSst_DN3273_c0_g1_i1_246_R	AGCGCAGTTAACTTCCAAGC	SWS3273
SWSst_DN3273_c0_g1_i1_758_R	CGCATACGACAGGTATCTCG	SWS3273
SWSst_DN3273_c0_g1_i1_1238_R	TTTTTCGCCCTTAATAAGTCAG	SWS3273
SWSst_DN3273_c0_g1_i1_1410_R	CGAATTGAAGAATCTGATACAATGA	SWS3273
HSKst_DN19371_c1_g4_i1_66_F	TTGGCTCTGCTCGTTACAAA	HSK19371
HSKst_DN19371_c1_g4_i1_431_F	AAGGGCTGTCGATCTAGCAA	HSK19371
HSKst_DN19371_c1_g4_i1_271_R	GAAAGAATGGTGCGGTCTGT	HSK19371
HSKst_DN19371_c1_g4_i1_793_R	CGGTAGTATCCCAAGGTGTGA	HSK19371
HSKst_DN19371_c1_g4_i1_951_R	GCAGAGCATTCGTTTCAAGT	HSK19371
HSKst_DN17703_c0_g1_i1_32_F	GCGGTGACTTTTGTGATCCT	HSK17703
HSKst_DN17703_c0_g1_i1_217_F	GCCACTCGACTTCGTCCTAC	HSK17703
HSKst_DN17703_c0_g1_i1_708_F	CTTTCCCGCGACATGTTAAA	HSK17703
HSKst_DN17703_c0_g1_i1_122_R	AGGCAATGCTGGAAACAAAC	HSK17703
HSKst_DN17703_c0_g1_i1_562_R	TGTTGCGTCAACGAAATCAG	HSK17703
HSKst_DN17703_c0_g1_i1_1074_R	CAACAACTTAGAAATCTCAATCCAA	HSK17703
BANst_DN25161_c0_g1_i1_24_F	CGACAAAGACGAAAATGAAGG	BAN25161
BANst_DN25161_c0_g1_i1_379_F	TGGATTCATGAGTGGGAAAA	BAN25161
BANst_DN25161_c0_g1_i1_216_R	CCAGAGCCCATGTAGGATGA	BAN25161
BANst_DN25161_c0_g1_i1_722_R	GGCTCGGGGAACTTGATATT	BAN25161
BANst_DN25161_c0_g1_i1_816_R	TCTCAAAATATCCACAACCAAGA	BAN25161
Primers for inheritance analysis
G1_RT_F	TGGCTATTGCTTGCAGGCAAACT	HY16290
G1_RT_R	CCGCTCTACTTAAATTGTTTTC	HY16290
G3_RT_F	CCTACCCCTGCAAATATAAGCC	HY11692
G3_RT_R	GGACCCAAAATAATTCAGTGT	HY11692
HYSISCst_DN8523_c0_g1_i1_420_F	TAAATCTTTTGCTGCCGAGA	HY8523
HYSISCst_DN8523_c0_g1_i1_1247_R	GATTTTGCCAGACCACATCC	HY8523
G5_Whole_F	ATGAAGAATAAGGCGATTTACC	HY9350
G5_Whole_R	TGGTAATACCCCAAGGTGTGA	HY9350
TBNst_DN21745_c0_g1_i1_288_F	TGGAAACATGAGTGGGATGA	TBN21745
TBNst_DN21745_c0_g1_i1_644_R	TTCTGTTCTGAAGGCATTGCT	TBN21745
TBNst_DN10176_c0_g1_i1_380_F	TTTGGAAAGATCAGTGGTTCG	TBN10176
TBNst_DN10176_c0_g1_i1_716_R	AATATCCGGCCCACAGTTTT	TBN10176

## Sheet: Table S4
Table S4. Transcripts differentially expressed between HYSI and HYSC styles detected by DESeq2 program using RNAseq data. T2 RNase was highlighted.
Transcript	p value	q value	Log2 fold change	Description
Upregulated in HYSC style
HY12581_c0_g2_i2	1.4708e-31	2.74715e-27	3.77405	fasciclin-like arabinogalactan protein 17
HY4904_c0_g1_i1	1.06793e-27	9.97339e-24	3.48123	hypothetical protein CICLE_v10017452mg
HY13377_c1_g4_i1	3.87289e-18	2.41126e-14	3.74787	heavy metal-associated isoprenylated plant protein 3-like
HY7235_c0_g2_i1	5.96451e-15	2.78513e-11	4.36451	copper transporter 6-like
HY10073_c0_g2_i3	1.77825e-12	6.64282e-09	2.38446	aspartate carbamoyltransferase, chloroplastic
HY13914_c2_g3_i1	4.75523e-10	8.88181e-07	1.44099	---NA---
HY11108_c0_g2_i2	8.49637e-10	1.43257e-06	2.02431	heavy metal-associated isoprenylated plant protein 21
HY10722_c1_g1_i4	2.54802e-09	3.66092e-06	1.54254	zinc finger BED domain-containing protein RICESLEEPER 2-like
HY12335_c3_g3_i1	9.84677e-08	9.1959e-05	1.94223	AAA-ATPase ASD, mitochondrial-like
HY16299_c1_g1_i1	2.20452e-07	0.000187164	1.27988	putative F-box protein PP2-B12
HY9877_c0_g5_i1	3.42348e-07	0.000278016	1.50677	---NA---
HY11879_c4_g1_i2	3.62236e-07	0.000281911	1.54658	---NA---
HY12612_c0_g3_i2	3.90114e-07	0.000287998	2.32691	major pollen allergen Ole e 10-like
HY13914_c2_g1_i1	4.00896e-07	0.000287998	1.41327	subtilisin-like protease SBT3.17
HY13754_c0_g4_i1	7.3922e-07	0.000511376	3.10619	putative F-box protein PP2-B12
HY11081_c2_g3_i1	1.53056e-06	0.000952925	2.89905	hypothetical protein CICLE_v10006799mg
HY9873_c1_g1_i1	5.21664e-06	0.00286578	2.22006	thaumatin-like protein
HY14700_c1_g7_i1	5.66767e-06	0.00288144	1.34816	putative F-box protein PP2-B12
HY6954_c0_g1_i1	9.50873e-06	0.00455395	1.82114	transmembrane protein 45A
HY8012_c0_g1_i1	2.25671e-05	0.00916324	3.70498	non-specific lipid-transfer protein A-like
HY11879_c4_g1_i1	3.26096e-05	0.0121816	1.37223	---NA---
HY11089_c2_g1_i2	3.47575e-05	0.0127294	1.67449	DDB1- and CUL4-associated factor 4
HY16181_c1_g1_i10	4.03216e-05	0.0144832	3.15745	helicase sen1-like
HY8475_c0_g1_i3	6.51126e-05	0.0219587	1.99071	protein TIC 20-IV, chloroplastic
HY13527_c1_g1_i11	6.7635e-05	0.0219587	1.69918	---NA---
HY12335_c3_g4_i1	6.93632e-05	0.0219587	2.57536	AAA-ATPase ASD, mitochondrial-like
HY8069_c0_g1_i2	7.39271e-05	0.0230135	2.00985	GDSL esterase/lipase At5g08460
HY9588_c1_g1_i1	8.07313e-05	0.0247197	1.82773	---NA---
HY14056_c1_g1_i6	8.36107e-05	0.0249352	0.945438	aspartic proteinase A1-like
HY16385_c2_g5_i3	8.54237e-05	0.0249352	1.29766	auxin response factor 4 isoform X1
HY16185_c2_g1_i1	8.54403e-05	0.0249352	1.13886	copper transporter 1-like
HY16583_c2_g2_i12	9.62483e-05	0.0268317	1.44714	zinc finger BED domain-containing protein RICESLEEPER 1-like isoform X1
HY6974_c0_g1_i1	0.000103476	0.027916	1.99318	late embryogenesis abundant domain-containing family protein
HY14371_c2_g1_i1	0.000108497	0.0282963	1.08723	putative lipid-transfer protein DIR1
HY14488_c0_g2_i2	0.000109077	0.0282963	1.48944	reverse transcriptase
HY9818_c1_g2_i1	0.000125278	0.0316209	2.97893	serine/threonine-protein phosphatase 7 long form homolog
HY6829_c0_g1_i1	0.000131581	0.032769	5.09603	transcription factor RAX2-like
HY11108_c0_g2_i6	0.000147539	0.0362597	1.45915	heavy metal-associated isoprenylated plant protein 30-like
HY16456_c0_g1_i2	0.000153947	0.0373431	1.44431	---NA---
HY9316_c3_g2_i1	0.000185405	0.0443975	2.13355	hypothetical protein CICLE_v10027346mg
Downregulated in HYSC sytle
HY16438_c1_g1_i1	5.04301e-12	1.56989e-08	-2.6637	major allergen Pru ar 1-like
HY14426_c4_g1_i1	1.29482e-11	3.45495e-08	-2.00184	acidic endochitinase-like
HY13084_c0_g3_i3	2.49422e-10	5.82337e-07	-2.13754	lipid transfer protein
HY819_c0_g1_i1	3.90094e-10	8.09575e-07	-2.78318	peroxidase 2-like
HY11303_c1_g5_i2	9.20377e-10	1.43257e-06	-2.13444	caffeic acid 3-O-methyltransferase-like
HY9396_c0_g2_i1	3.04277e-09	4.05112e-06	-2.19205	hypothetical protein CISIN_1g037576mg
HY8536_c0_g1_i1	3.25339e-09	4.05112e-06	-2.63213	Late embryogenesis abundant protein, LEA-14
HY14783_c1_g3_i1	8.96769e-09	1.04687e-05	-6.55315	major allergen Pru ar 1-like
HY15845_c3_g1_i1	1.56018e-08	1.71417e-05	-1.32292	glycine-rich cell wall structural protein 2-like
HY10677_c0_g2_i1	9.23907e-08	9.1959e-05	-2.39247	probable L-gulonolactone oxidase 6
HY157_c0_g1_i1	9.52165e-08	9.1959e-05	-2.74907	F-box/kelch-repeat protein SKIP25-like
HY14947_c1_g4_i1	1.4647e-07	0.000130274	-6.11936	desiccation-related protein PCC13-62-like
HY10613_c0_g1_i1	9.81217e-07	0.000654542	-1.87136	hypothetical protein CICLE_v10009387mg
HY27349_c0_g1_i1	1.26718e-06	0.00081615	-3.3665	probable 2-oxoglutarate-dependent dioxygenase AOP1
HY11059_c1_g1_i1	2.60736e-06	0.00157098	-4.11185	cytochrome P450 734A1-like
HY12971_c1_g1_i2	3.15192e-06	0.00183974	-1.75491	homeobox-leucine zipper protein MERISTEM L1-like
HY8603_c0_g2_i1	3.95585e-06	0.00223901	-3.26789	omega-hydroxypalmitate O-feruloyl transferase-like
HY12654_c0_g4_i1	5.65062e-06	0.00288144	-2.69935	---NA---
HY10677_c0_g3_i1	5.70795e-06	0.00288144	-2.6937	probable L-gulonolactone oxidase 6
HY15332_c2_g1_i2	8.6889e-06	0.00427082	-1.69921	probable beta-1,3-galactosyltransferase 8
HY11149_c1_g1_i1	1.42168e-05	0.00663854	-2.4734	elongation of fatty acids protein sre1-like
HY25829_c0_g1_i1	1.46541e-05	1	-6.46606	lipid transfer-like protein VAS
HY9350_c0_g2_i1	1.57799e-05	0.00718869	-2.23751	extracellular ribonuclease LE
HY13379_c1_g4_i1	1.66943e-05	0.00742421	-1.22426	21 kDa seed protein-like
HY15594_c1_g1_i1	1.73565e-05	0.00753918	-1.15111	---NA---
HY8608_c0_g1_i1	1.83568e-05	0.00779245	-1.55331	UDP-glycosyltransferase 73C3-like
HY6199_c0_g1_i1	1.98629e-05	0.00824444	-4.09858	Bifunctional inhibitor/plant lipid transfer protein/seed storage helical domain
HY11810_c2_g1_i1	2.76104e-05	0.0108596	-2.29055	stearoyl-[acyl-carrier-protein] 9-desaturase 6, chloroplastic
HY8885_c0_g1_i1	2.79078e-05	0.0108596	-1.23617	glycerol-3-phosphate acyltransferase 1
HY10819_c0_g3_i1	2.95778e-05	0.0112746	-1.03422	ABC transporter G family member 6-like
HY10889_c5_g1_i1	4.40886e-05	0.0155375	-5.24782	9-cis-epoxycarotenoid dioxygenase NCED6, chloroplastic
HY13155_c2_g5_i1	6.51009e-05	0.0219587	-1.68692	L-type lectin-domain containing receptor kinase IV.2-like
HY13084_c0_g3_i1	6.66512e-05	0.0219587	-1.90258	lipid transfer protein
HY13379_c1_g6_i1	6.93608e-05	0.0219587	-1.10066	miraculin-like protein 1
HY8157_c0_g1_i1	9.23407e-05	0.0265345	-2.34224	putative indole-3-acetic acid-amido synthetase GH3.9
HY11097_c4_g1_i2	9.55931e-05	0.0268317	-1.02677	basic endochitinase C-like
HY2198_c0_g1_i1	0.000104197	0.027916	-2.09923	F-box/FBD/LRR-repeat protein At5g53840-like isoform X1
HY13119_c0_g4_i1	0.000104621	0.027916	-1.25948	---NA---
HY13084_c0_g3_i2	0.000124884	0.0316209	-2.0159	lipid transfer protein

## Sheet: Table S5
Table S4. Pairwise comparison matrix for amino acid sequences of T2-RNase and S-RNases. Lower left matrix shows a pairwise p-distance and upper right a number of different amino aicd residue.
	HY11692	HY9350	HSK19371	BAN25161	HSK17703	TBN21745	S1-ribonuclease	S2-ribonuclease	S3-ribonuclease	S4-ribonuclease	S5-ribonuclease	S6-ribonuclease	S7-ribonuclease	S8-ribonuclease	S9-ribonuclease	S10-ribonuclease	S11-ribonuclease	S12-ribonuclease	S13-ribonuclease	S14-ribonuclease	SmR-ribonuclease
HY11692		133	131	125	121	122	126	125	128	123	0	123	122	121	131	131	134	130	2	107	124
HY9350	0.624		43	103	125	125	124	103	81	127	133	122	134	125	85	83	133	86	134	134	124
HSK19371	0.615	0.191		103	126	131	129	103	79	131	131	126	137	126	86	86	132	88	133	132	132
BAN25161	0.573	0.464	0.464		135	134	135	0	108	135	125	130	131	135	112	113	133	113	126	131	142
HSK17703	0.568	0.584	0.589	0.614		85	87	135	131	96	121	65	129	0	131	131	121	130	122	128	91
TBN21745	0.575	0.584	0.612	0.612	0.394		90	134	125	96	122	89	126	85	138	135	120	136	123	131	91
S1-ribonuclease	0.594	0.579	0.603	0.616	0.403	0.413		135	124	51	126	93	124	87	137	136	122	134	127	128	52
S2-ribonuclease	0.573	0.464	0.464	0	0.614	0.612	0.616		108	135	125	130	131	135	112	113	133	113	126	131	142
S3-ribonuclease	0.587	0.362	0.353	0.474	0.593	0.571	0.566	0.474		126	128	125	134	131	70	68	131	68	129	133	132
S4-ribonuclease	0.577	0.591	0.609	0.614	0.442	0.438	0.23	0.614	0.573		123	95	125	96	137	137	124	134	124	132	54
S5-ribonuclease	0	0.624	0.615	0.573	0.568	0.575	0.594	0.573	0.587	0.577		123	122	121	131	131	134	130	2	107	124
S6-ribonuclease	0.577	0.573	0.592	0.594	0.297	0.412	0.431	0.594	0.571	0.438	0.577		128	65	134	136	117	131	124	130	93
S7-ribonuclease	0.557	0.609	0.623	0.582	0.578	0.583	0.574	0.582	0.593	0.576	0.557	0.584		129	137	136	123	137	124	120	123
S8-ribonuclease	0.568	0.584	0.589	0.614	0	0.394	0.403	0.614	0.593	0.442	0.568	0.297	0.578		131	131	121	130	122	128	91
S9-ribonuclease	0.601	0.379	0.384	0.493	0.598	0.63	0.626	0.493	0.306	0.623	0.601	0.615	0.612	0.598		22	132	5	132	139	142
S10-ribonuclease	0.601	0.371	0.384	0.498	0.598	0.616	0.621	0.498	0.297	0.623	0.601	0.624	0.607	0.598	0.096		133	24	131	138	139
S11-ribonuclease	0.612	0.607	0.603	0.594	0.56	0.553	0.562	0.594	0.585	0.569	0.612	0.544	0.552	0.56	0.589	0.594		132	134	128	120
S12-ribonuclease	0.596	0.384	0.393	0.498	0.594	0.621	0.612	0.498	0.297	0.609	0.596	0.601	0.612	0.594	0.022	0.105	0.589		131	138	139
S13-ribonuclease	0.009	0.629	0.624	0.578	0.573	0.58	0.599	0.578	0.592	0.582	0.009	0.582	0.566	0.573	0.606	0.601	0.612	0.601		108	125
S14-ribonuclease	0.495	0.618	0.608	0.595	0.604	0.612	0.598	0.595	0.599	0.614	0.495	0.613	0.55	0.604	0.626	0.622	0.579	0.622	0.5		133
SmR-ribonuclease	0.588	0.582	0.62	0.651	0.423	0.419	0.236	0.651	0.606	0.244	0.588	0.433	0.572	0.423	0.651	0.638	0.556	0.638	0.592	0.624
