# Supplementary material for: Association of T2/S-RNase With Self-Incompatibility of Japanese Citrus Accessions Examined by Transcriptomic, Phylogenetic, and Genetic Approaches
Source: Front Plant Sci. 2021 Feb 12;12:638321. doi: 10.3389/fpls.2021.638321 (PMC7909312; doi:10.3389/fpls.2021.638321)
Supplement: Supplementary file 3 [file Table_2.XLSX]

## Sheet: Table S3
Table S3. Transcriptome annotations of Hyuganatsu (HY), Hassaku (HSK), Tosabuntan (TBN), Banpeiyu (BAN), and Sweet Spring (SWS) by Blast2GO.
SeqName	Description	Length	#Hits	e-Value	sim mean	#GO	GO IDs	GO Names	Enzyme Codes	Enzyme Names	InterPro IDs	InterPro GO IDs	InterPro GO Names
HY0_c0_g1_i1	PREDICTED: uncharacterized protein LOC107175981	354	2	3.39381e-08	54						no IPS match	no IPS match	no IPS match
HY1_c0_g1_i1	---NA---	210									mobidb-lite (MOBIDB_LITE)	no GO terms	no GO terms
HY10_c0_g1_i1	G-type lectin S-receptor-like serine/threonine-protein kinase B120	230	20	5.01483e-47	98	8	F:GO:0004674; F:GO:0005515; F:GO:0005524; C:GO:0005886; P:GO:0006468; C:GO:0016021; F:GO:0030246; P:GO:0048544	F:protein serine/threonine kinase activity; F:protein binding; F:ATP binding; C:plasma membrane; P:protein phosphorylation; C:integral component of membrane; F:carbohydrate binding; P:recognition of pollen	EC:2.7.11	Transferring phosphorus-containing groups	G3DSA:1.10.510.10 (GENE3D); IPR000719 (PFAM); PTHR27002 (PANTHER); PTHR27002:SF361 (PANTHER); IPR000719 (PROSITE_PROFILES); IPR011009 (SUPERFAMILY)	F:GO:0004672; F:GO:0005524; P:GO:0006468	F:protein kinase activity; F:ATP binding; P:protein phosphorylation
HY100_c0_g1_i1	putative clathrin assembly protein At5g35200 isoform X1	354	20	5.82306e-58	84	6	F:GO:0005545; C:GO:0030136; F:GO:0030276; F:GO:0032440; P:GO:0048268; P:GO:0055114	F:1-phosphatidylinositol binding; C:clathrin-coated vesicle; F:clathrin binding; F:2-alkenal reductase [NAD(P)] activity; P:clathrin coat assembly; P:oxidation-reduction process	EC:1.3.1.74	2-alkenal reductase (NAD(P)(+))	IPR014712 (G3DSA:1.20.58.GENE3D); IPR011417 (PFAM); PTHR22951 (PANTHER); PTHR22951:SF32 (PANTHER); SSF89009 (SUPERFAMILY)	F:GO:0005543; F:GO:0005545; C:GO:0030136; F:GO:0030276; P:GO:0048268	F:phospholipid binding; F:1-phosphatidylinositol binding; C:clathrin-coated vesicle; F:clathrin binding; P:clathrin coat assembly
HY1000_c0_g1_i1	predicted protein	482	20	2.65537e-56	80						no IPS match	no IPS match	no IPS match
HY10000_c0_g1_i1	tRNA (guanine(10)-N2)-methyltransferase homolog	1049	20	9.16982e-174	84.6	5	F:GO:0003676; P:GO:0006400; F:GO:0008168; P:GO:0032259; P:GO:0080180	F:nucleic acid binding; P:tRNA modification; F:methyltransferase activity; P:methylation; P:2-methylguanosine metabolic process			G3DSA:3.40.50.150 (GENE3D); IPR000241 (PFAM); PTHR13370:SF3 (PANTHER); PTHR13370 (PANTHER); IPR029063 (SUPERFAMILY)	no GO terms	no GO terms
HY10000_c0_g1_i10	tRNA (guanine(10)-N2)-methyltransferase homolog	248	20	6.14622e-22	93.8	5	F:GO:0003676; P:GO:0006400; F:GO:0008168; P:GO:0032259; P:GO:0080180	F:nucleic acid binding; P:tRNA modification; F:methyltransferase activity; P:methylation; P:2-methylguanosine metabolic process			no IPS match	no IPS match	no IPS match
HY10000_c0_g1_i2	tRNA (guanine(10)-N2)-methyltransferase homolog	988	20	8.0217e-155	90.7	5	F:GO:0003676; P:GO:0006400; F:GO:0008168; P:GO:0032259; P:GO:0080180	F:nucleic acid binding; P:tRNA modification; F:methyltransferase activity; P:methylation; P:2-methylguanosine metabolic process			IPR000241 (PFAM); G3DSA:3.40.50.150 (GENE3D); PTHR13370 (PANTHER); PTHR13370:SF3 (PANTHER); IPR029063 (SUPERFAMILY)	no GO terms	no GO terms
HY10000_c0_g1_i3	tRNA (guanine(10)-N2)-methyltransferase homolog	971	20	0	92.2	5	F:GO:0003676; P:GO:0006400; F:GO:0008168; P:GO:0032259; P:GO:0080180	F:nucleic acid binding; P:tRNA modification; F:methyltransferase activity; P:methylation; P:2-methylguanosine metabolic process			IPR000241 (PFAM); PIRSF017259 (PIRSF); G3DSA:3.40.50.150 (GENE3D); PTHR13370 (PANTHER); PTHR13370:SF3 (PANTHER); IPR016691 (PROSITE_PROFILES); IPR029063 (SUPERFAMILY)	F:GO:0008168	F:methyltransferase activity
HY10000_c0_g1_i4	tRNA (guanine(10)-N2)-methyltransferase homolog	1057	20	1.55853e-149	90.95	5	F:GO:0003676; P:GO:0006400; F:GO:0008168; P:GO:0032259; P:GO:0080180	F:nucleic acid binding; P:tRNA modification; F:methyltransferase activity; P:methylation; P:2-methylguanosine metabolic process			IPR000241 (PFAM); G3DSA:3.40.50.150 (GENE3D); PTHR13370 (PANTHER); PTHR13370:SF3 (PANTHER); IPR029063 (SUPERFAMILY)	no GO terms	no GO terms
HY10000_c0_g1_i5	tRNA (guanine(10)-N2)-methyltransferase homolog	1413	20	0	91.95	5	F:GO:0003676; P:GO:0006400; F:GO:0008168; P:GO:0032259; P:GO:0080180	F:nucleic acid binding; P:tRNA modification; F:methyltransferase activity; P:methylation; P:2-methylguanosine metabolic process			IPR000241 (PFAM); G3DSA:3.40.50.150 (GENE3D); PIRSF017259 (PIRSF); mobidb-lite (MOBIDB_LITE); PTHR13370 (PANTHER); PTHR13370:SF3 (PANTHER); IPR016691 (PROSITE_PROFILES); IPR029063 (SUPERFAMILY)	F:GO:0008168	F:methyltransferase activity
HY10000_c0_g1_i6	tRNA (guanine(10)-N2)-methyltransferase homolog	921	20	0	92.25	5	F:GO:0003676; P:GO:0006400; F:GO:0008168; P:GO:0032259; P:GO:0080180	F:nucleic acid binding; P:tRNA modification; F:methyltransferase activity; P:methylation; P:2-methylguanosine metabolic process			G3DSA:3.40.50.150 (GENE3D); PIRSF017259 (PIRSF); IPR000241 (PFAM); mobidb-lite (MOBIDB_LITE); PTHR13370 (PANTHER); PTHR13370:SF3 (PANTHER); IPR016691 (PROSITE_PROFILES); IPR029063 (SUPERFAMILY)	F:GO:0008168	F:methyltransferase activity
HY10000_c0_g1_i7	tRNA (guanine(10)-N2)-methyltransferase homolog	1040	20	0	85.25	5	F:GO:0003676; P:GO:0006400; F:GO:0008168; P:GO:0032259; P:GO:0080180	F:nucleic acid binding; P:tRNA modification; F:methyltransferase activity; P:methylation; P:2-methylguanosine metabolic process			G3DSA:3.40.50.150 (GENE3D); IPR000241 (PFAM); PTHR13370:SF3 (PANTHER); PTHR13370 (PANTHER); IPR029063 (SUPERFAMILY)	no GO terms	no GO terms
HY10000_c0_g1_i8	tRNA (guanine(10)-N2)-methyltransferase homolog	1126	20	0	92.2	5	F:GO:0003676; P:GO:0006400; F:GO:0008168; P:GO:0032259; P:GO:0080180	F:nucleic acid binding; P:tRNA modification; F:methyltransferase activity; P:methylation; P:2-methylguanosine metabolic process			G3DSA:3.40.50.150 (GENE3D); PIRSF017259 (PIRSF); IPR000241 (PFAM); mobidb-lite (MOBIDB_LITE); PTHR13370 (PANTHER); PTHR13370:SF3 (PANTHER); IPR016691 (PROSITE_PROFILES); IPR029063 (SUPERFAMILY)	F:GO:0008168	F:methyltransferase activity
HY10000_c0_g1_i9	tRNA (guanine(10)-N2)-methyltransferase homolog	1258	20	0	91.95	5	F:GO:0003676; P:GO:0006400; F:GO:0008168; P:GO:0032259; P:GO:0080180	F:nucleic acid binding; P:tRNA modification; F:methyltransferase activity; P:methylation; P:2-methylguanosine metabolic process			PIRSF017259 (PIRSF); G3DSA:3.40.50.150 (GENE3D); IPR000241 (PFAM); PTHR13370:SF3 (PANTHER); PTHR13370 (PANTHER); IPR016691 (PROSITE_PROFILES); IPR029063 (SUPERFAMILY)	F:GO:0008168	F:methyltransferase activity
HY10000_c0_g2_i1	protein jagunal homolog 1	1326	20	2.55164e-29	86.65	3	C:GO:0005789; P:GO:0007029; C:GO:0016021	C:endoplasmic reticulum membrane; P:endoplasmic reticulum organization; C:integral component of membrane			IPR009787 (PANTHER); PTHR20955:SF1 (PANTHER)	C:GO:0005789; P:GO:0007029	C:endoplasmic reticulum membrane; P:endoplasmic reticulum organization
HY10000_c0_g2_i10	tRNA (guanine(10)-N2)-methyltransferase homolog	930	20	4.63594e-136	87.8	3	F:GO:0003676; F:GO:0008168; P:GO:0032259	F:nucleic acid binding; F:methyltransferase activity; P:methylation			G3DSA:3.40.50.150 (GENE3D); PTHR13370 (PANTHER); PTHR13370:SF3 (PANTHER); IPR029063 (SUPERFAMILY)	no GO terms	no GO terms
HY10000_c0_g2_i11	protein jagunal homolog 1	1419	18	3.98746e-18	74.78	3	C:GO:0005789; P:GO:0007029; C:GO:0016021	C:endoplasmic reticulum membrane; P:endoplasmic reticulum organization; C:integral component of membrane			no IPS match	no IPS match	no IPS match
HY10000_c0_g2_i12	---NA---	527									mobidb-lite (MOBIDB_LITE)	no GO terms	no GO terms
HY10000_c0_g2_i13	tRNA (guanine(10)-N2)-methyltransferase homolog	946	20	2.04729e-131	89.9	5	F:GO:0003676; P:GO:0006400; F:GO:0008168; P:GO:0032259; P:GO:0080180	F:nucleic acid binding; P:tRNA modification; F:methyltransferase activity; P:methylation; P:2-methylguanosine metabolic process			G3DSA:3.40.50.150 (GENE3D); PTHR13370 (PANTHER); PTHR13370:SF3 (PANTHER); IPR029063 (SUPERFAMILY)	no GO terms	no GO terms
HY10000_c0_g2_i14	protein jagunal homolog 1	1461	20	1.17503e-41	82.2	3	C:GO:0005789; P:GO:0007029; C:GO:0016021	C:endoplasmic reticulum membrane; P:endoplasmic reticulum organization; C:integral component of membrane			IPR009787 (PFAM); mobidb-lite (MOBIDB_LITE); PTHR20955:SF1 (PANTHER); IPR009787 (PANTHER)	C:GO:0005789; P:GO:0007029	C:endoplasmic reticulum membrane; P:endoplasmic reticulum organization
HY10000_c0_g2_i2	protein jagunal homolog 1	754	20	3.24551e-19	73.7	3	C:GO:0005789; P:GO:0007029; C:GO:0016021	C:endoplasmic reticulum membrane; P:endoplasmic reticulum organization; C:integral component of membrane			no IPS match	no IPS match	no IPS match
HY10000_c0_g2_i3	tRNA (guanine(10)-N2)-methyltransferase homolog	1820	20	2.00645e-152	90	5	F:GO:0003676; P:GO:0006400; F:GO:0008168; P:GO:0032259; P:GO:0080180	F:nucleic acid binding; P:tRNA modification; F:methyltransferase activity; P:methylation; P:2-methylguanosine metabolic process			IPR005162 (PFAM); mobidb-lite (MOBIDB_LITE); mobidb-lite (MOBIDB_LITE); PTHR35046 (PANTHER)	no GO terms	no GO terms
HY10000_c0_g2_i4	hypothetical protein CICLE_v10006041mg	396	5	1.16221e-12	77.2	3	C:GO:0005789; P:GO:0007029; C:GO:0016021	C:endoplasmic reticulum membrane; P:endoplasmic reticulum organization; C:integral component of membrane			no IPS match	no IPS match	no IPS match
HY10000_c0_g2_i5	hypothetical protein CICLE_v10006041mg	854	2	3.19889e-07	75	1	C:GO:0044425	C:membrane part			no IPS match	no IPS match	no IPS match
HY10000_c0_g2_i6	protein jagunal homolog 1	1426	20	2.76959e-29	84.5	3	C:GO:0005789; P:GO:0007029; C:GO:0016021	C:endoplasmic reticulum membrane; P:endoplasmic reticulum organization; C:integral component of membrane			no IPS match	no IPS match	no IPS match
HY10000_c0_g2_i7	protein jagunal homolog 1	1361	20	4.83383e-42	82.75	3	C:GO:0005789; P:GO:0007029; C:GO:0016021	C:endoplasmic reticulum membrane; P:endoplasmic reticulum organization; C:integral component of membrane			IPR009787 (PFAM); mobidb-lite (MOBIDB_LITE); PTHR20955:SF1 (PANTHER); IPR009787 (PANTHER)	C:GO:0005789; P:GO:0007029	C:endoplasmic reticulum membrane; P:endoplasmic reticulum organization
HY10000_c0_g2_i8	---NA---	205									no IPS match	no IPS match	no IPS match
HY10000_c0_g2_i9	protein jagunal homolog 1	1375	20	1.98617e-73	78.3	3	C:GO:0005789; P:GO:0007029; C:GO:0016021	C:endoplasmic reticulum membrane; P:endoplasmic reticulum organization; C:integral component of membrane			IPR009787 (PFAM); mobidb-lite (MOBIDB_LITE); PTHR20955:SF1 (PANTHER); IPR009787 (PANTHER)	C:GO:0005789; P:GO:0007029	C:endoplasmic reticulum membrane; P:endoplasmic reticulum organization
HY10000_c0_g3_i1	---NA---	289									no IPS match	no IPS match	no IPS match
HY10000_c0_g4_i1	tRNA (guanine(10)-N2)-methyltransferase homolog	782	20	3.48064e-08	95.8	5	F:GO:0003676; P:GO:0006400; F:GO:0008168; P:GO:0032259; P:GO:0080180	F:nucleic acid binding; P:tRNA modification; F:methyltransferase activity; P:methylation; P:2-methylguanosine metabolic process			no IPS match	no IPS match	no IPS match
HY10001_c0_g1_i1	Integrase, catalytic core	971	20	4.04072e-19	71.3	1	F:GO:0005488	F:binding			no IPS match	no IPS match	no IPS match
HY10001_c0_g1_i2	---NA---	544									no IPS match	no IPS match	no IPS match
HY10001_c1_g1_i1	---NA---	204									no IPS match	no IPS match	no IPS match
HY10001_c1_g1_i10	hypothetical protein CISIN_1g036576mg, partial	1539	1	1.77236e-07	46						PS51257 (PROSITE_PROFILES)	no GO terms	no GO terms
HY10001_c1_g1_i11	---NA---	360									no IPS match	no IPS match	no IPS match
HY10001_c1_g1_i2	hypothetical protein VITISV_032357	799	20	2.29621e-59	83.95	6	F:GO:0003676; F:GO:0004190; C:GO:0005634; P:GO:0006508; F:GO:0008270; P:GO:0015074	F:nucleic acid binding; F:aspartic-type endopeptidase activity; C:nucleus; P:proteolysis; F:zinc ion binding; P:DNA integration	EC:3.4.23	Acting on peptide bonds (peptidases)	IPR036397 (G3DSA:3.30.420.GENE3D); IPR001584 (PFAM); PTHR24559:SF247 (PANTHER); PTHR24559 (PANTHER); IPR001584 (PROSITE_PROFILES); IPR012337 (SUPERFAMILY)	F:GO:0003676; P:GO:0015074	F:nucleic acid binding; P:DNA integration
HY10001_c1_g1_i3	PREDICTED: uncharacterized protein LOC107177839	1951	5	2.7079e-42	66.4						PS51257 (PROSITE_PROFILES)	no GO terms	no GO terms
HY10001_c1_g1_i4	PREDICTED: uncharacterized protein LOC107177839	1683	4	8.59778e-43	71.5						mobidb-lite (MOBIDB_LITE); PS51257 (PROSITE_PROFILES)	no GO terms	no GO terms
HY10001_c1_g1_i5	---NA---	1271									mobidb-lite (MOBIDB_LITE); PS51257 (PROSITE_PROFILES)	no GO terms	no GO terms
HY10001_c1_g1_i6	hypothetical protein VITISV_032357	1991	20	8.63768e-59	83.75	6	F:GO:0003676; F:GO:0004190; C:GO:0005634; P:GO:0006508; F:GO:0008270; P:GO:0015074	F:nucleic acid binding; F:aspartic-type endopeptidase activity; C:nucleus; P:proteolysis; F:zinc ion binding; P:DNA integration	EC:3.4.23	Acting on peptide bonds (peptidases)	IPR036397 (G3DSA:3.30.420.GENE3D); IPR001584 (PFAM); PTHR24559:SF247 (PANTHER); PTHR24559 (PANTHER); IPR001584 (PROSITE_PROFILES); IPR012337 (SUPERFAMILY)	F:GO:0003676; P:GO:0015074	F:nucleic acid binding; P:DNA integration
HY10001_c1_g1_i7	---NA---	304									mobidb-lite (MOBIDB_LITE)	no GO terms	no GO terms
HY10001_c1_g1_i8	LOW QUALITY PROTEIN: uncharacterized protein LOC105647934, partial	586	20	1.28536e-84	86.9	6	F:GO:0003676; F:GO:0004190; C:GO:0005634; P:GO:0006508; F:GO:0008270; P:GO:0015074	F:nucleic acid binding; F:aspartic-type endopeptidase activity; C:nucleus; P:proteolysis; F:zinc ion binding; P:DNA integration	EC:3.4.23	Acting on peptide bonds (peptidases)	IPR001584 (PFAM); IPR036397 (G3DSA:3.30.420.GENE3D); PTHR44369 (PANTHER); IPR001584 (PROSITE_PROFILES); IPR012337 (SUPERFAMILY)	F:GO:0003676; P:GO:0015074	F:nucleic acid binding; P:DNA integration
HY10001_c1_g1_i9	hypothetical protein VITISV_032357	682	20	1.69656e-59	83.95	6	F:GO:0003676; F:GO:0004190; C:GO:0005634; P:GO:0006508; F:GO:0008270; P:GO:0015074	F:nucleic acid binding; F:aspartic-type endopeptidase activity; C:nucleus; P:proteolysis; F:zinc ion binding; P:DNA integration	EC:3.4.23	Acting on peptide bonds (peptidases)	IPR036397 (G3DSA:3.30.420.GENE3D); IPR001584 (PFAM); PTHR24559:SF247 (PANTHER); PTHR24559 (PANTHER); IPR001584 (PROSITE_PROFILES); IPR012337 (SUPERFAMILY)	F:GO:0003676; P:GO:0015074	F:nucleic acid binding; P:DNA integration
HY10001_c1_g2_i1	cyclin-U1-1	1318	20	2.79449e-149	83.6	2	P:GO:0000079; F:GO:0019901	P:regulation of cyclin-dependent protein serine/threonine kinase activity; F:protein kinase binding			IPR036915 (G3DSA:1.10.472.GENE3D); IPR012389 (PIRSF); IPR013922 (PFAM); mobidb-lite (MOBIDB_LITE); PTHR15615:SF0 (PANTHER); PTHR15615 (PANTHER); IPR036915 (SUPERFAMILY)	P:GO:0000079; F:GO:0019901	P:regulation of cyclin-dependent protein serine/threonine kinase activity; F:protein kinase binding
HY10001_c1_g2_i2	cyclin-U1-1	1323	20	3.0028e-149	83.6	2	P:GO:0000079; F:GO:0019901	P:regulation of cyclin-dependent protein serine/threonine kinase activity; F:protein kinase binding			IPR036915 (G3DSA:1.10.472.GENE3D); IPR012389 (PIRSF); IPR013922 (PFAM); mobidb-lite (MOBIDB_LITE); PTHR15615:SF0 (PANTHER); PTHR15615 (PANTHER); IPR036915 (SUPERFAMILY)	P:GO:0000079; F:GO:0019901	P:regulation of cyclin-dependent protein serine/threonine kinase activity; F:protein kinase binding
HY10001_c2_g1_i1	LOW QUALITY PROTEIN: uncharacterized protein LOC105647934, partial	625	20	8.9197e-113	85.5	9	F:GO:0003676; F:GO:0004190; F:GO:0004672; F:GO:0005524; C:GO:0005634; P:GO:0006468; P:GO:0006508; F:GO:0008270; P:GO:0015074	F:nucleic acid binding; F:aspartic-type endopeptidase activity; F:protein kinase activity; F:ATP binding; C:nucleus; P:protein phosphorylation; P:proteolysis; F:zinc ion binding; P:DNA integration	EC:3.4.23	Acting on peptide bonds (peptidases)	IPR001584 (PFAM); IPR036397 (G3DSA:3.30.420.GENE3D); PTHR24559:SF247 (PANTHER); PTHR24559 (PANTHER); IPR001584 (PROSITE_PROFILES); IPR012337 (SUPERFAMILY)	F:GO:0003676; P:GO:0015074	F:nucleic acid binding; P:DNA integration
HY10001_c3_g1_i1	---NA---	371									mobidb-lite (MOBIDB_LITE)	no GO terms	no GO terms
HY10002_c0_g1_i1	WAS/WASL-interacting protein family member 1	1329	8	5.77439e-69	73.13	2	C:GO:0016020; C:GO:0016021	C:membrane; C:integral component of membrane			mobidb-lite (MOBIDB_LITE); PTHR34938:SF1 (PANTHER); PTHR34938 (PANTHER)	no GO terms	no GO terms
HY10002_c0_g1_i10	hypothetical protein CICLE_v10029514mg	1070	5	6.4293e-81	84.6	2	C:GO:0016020; C:GO:0016021	C:membrane; C:integral component of membrane			no IPS match	no IPS match	no IPS match
HY10002_c0_g1_i11	PREDICTED: uncharacterized protein LOC102623881 isoform X1	1739	6	1.55442e-55	80	2	C:GO:0016020; C:GO:0016021	C:membrane; C:integral component of membrane			mobidb-lite (MOBIDB_LITE); PTHR34938:SF1 (PANTHER); PTHR34938 (PANTHER)	no GO terms	no GO terms
HY10002_c0_g1_i12	hypothetical protein CICLE_v10029514mg	1327	5	9.30997e-80	84.6	2	C:GO:0016020; C:GO:0016021	C:membrane; C:integral component of membrane			no IPS match	no IPS match	no IPS match
HY10002_c0_g1_i13	hypothetical protein CICLE_v10029514mg	1737	5	2.18e-66	83.6	2	C:GO:0016020; C:GO:0016021	C:membrane; C:integral component of membrane			no IPS match	no IPS match	no IPS match
HY10002_c0_g1_i14	hypothetical protein CICLE_v10029514mg	1722	5	1.95467e-66	83.6	2	C:GO:0016020; C:GO:0016021	C:membrane; C:integral component of membrane			no IPS match	no IPS match	no IPS match
HY10002_c0_g1_i15	hypothetical protein CICLE_v10029514mg	1465	5	2.55029e-67	83.6	2	C:GO:0016020; C:GO:0016021	C:membrane; C:integral component of membrane			no IPS match	no IPS match	no IPS match
HY10002_c0_g1_i16	hypothetical protein CICLE_v10029514mg	1085	5	7.56652e-81	84.6	2	C:GO:0016020; C:GO:0016021	C:membrane; C:integral component of membrane			no IPS match	no IPS match	no IPS match
HY10002_c0_g1_i2	PREDICTED: uncharacterized protein LOC102623881 isoform X1	1648	6	8.72634e-56	80	2	C:GO:0016020; C:GO:0016021	C:membrane; C:integral component of membrane			mobidb-lite (MOBIDB_LITE); PTHR34938:SF1 (PANTHER); PTHR34938 (PANTHER)	no GO terms	no GO terms
HY10002_c0_g1_i3	WAS/WASL-interacting protein family member 1	1268	8	3.29235e-69	73.13	2	C:GO:0016020; C:GO:0016021	C:membrane; C:integral component of membrane			mobidb-lite (MOBIDB_LITE); PTHR34938 (PANTHER); PTHR34938:SF1 (PANTHER)	no GO terms	no GO terms
HY10002_c0_g1_i4	WAS/WASL-interacting protein family member 1	1253	8	2.85359e-69	73.13	2	C:GO:0016020; C:GO:0016021	C:membrane; C:integral component of membrane			mobidb-lite (MOBIDB_LITE); PTHR34938:SF1 (PANTHER); PTHR34938 (PANTHER)	no GO terms	no GO terms
HY10002_c0_g1_i5	PREDICTED: uncharacterized protein LOC102623881 isoform X1	1663	6	9.63509e-56	80	2	C:GO:0016020; C:GO:0016021	C:membrane; C:integral component of membrane			mobidb-lite (MOBIDB_LITE); PTHR34938:SF1 (PANTHER); PTHR34938 (PANTHER)	no GO terms	no GO terms
HY10002_c0_g1_i6	hypothetical protein CICLE_v10029514mg	1204	5	2.69351e-80	84.6	2	C:GO:0016020; C:GO:0016021	C:membrane; C:integral component of membrane			no IPS match	no IPS match	no IPS match
HY10002_c0_g1_i7	hypothetical protein CICLE_v10029514mg	1200	5	1.74016e-29	83.8	2	C:GO:0016020; C:GO:0016021	C:membrane; C:integral component of membrane			no IPS match	no IPS match	no IPS match
HY10002_c0_g1_i8	WAS/WASL-interacting protein family member 1	1344	8	6.62818e-69	73.13	2	C:GO:0016020; C:GO:0016021	C:membrane; C:integral component of membrane			mobidb-lite (MOBIDB_LITE); PTHR34938 (PANTHER); PTHR34938:SF1 (PANTHER)	no GO terms	no GO terms
HY10002_c0_g1_i9	PREDICTED: uncharacterized protein LOC102623881 isoform X1	1724	6	1.41583e-55	80	2	C:GO:0016020; C:GO:0016021	C:membrane; C:integral component of membrane			mobidb-lite (MOBIDB_LITE); PTHR34938:SF1 (PANTHER); PTHR34938 (PANTHER)	no GO terms	no GO terms
HY10003_c0_g1_i1	---NA---	346									no IPS match	no IPS match	no IPS match
HY10003_c1_g1_i1	UDP-glycosyltransferase 84B1	1966	20	0	81.2	4	P:GO:0008152; C:GO:0043231; F:GO:0080043; F:GO:0080044	P:metabolic process; C:intracellular membrane-bounded organelle; F:quercetin 3-O-glucosyltransferase activity; F:quercetin 7-O-glucosyltransferase activity			G3DSA:3.40.50.2000 (GENE3D); IPR002213 (PFAM); G3DSA:3.40.50.2000 (GENE3D); PTHR11926:SF726 (PANTHER); PTHR11926 (PANTHER); cd03784 (CDD); SSF53756 (SUPERFAMILY)	P:GO:0008152; F:GO:0016758	P:metabolic process; F:transferase activity, transferring hexosyl groups
HY10003_c2_g1_i1	maf-like protein	1420	20	1.62563e-179	73.1	1	C:GO:0016021	C:integral component of membrane			mobidb-lite (MOBIDB_LITE); mobidb-lite (MOBIDB_LITE); mobidb-lite (MOBIDB_LITE); PTHR35490 (PANTHER)	no GO terms	no GO terms
HY10003_c2_g1_i2	maf-like protein	1814	20	0	85.55	1	C:GO:0016021	C:integral component of membrane			mobidb-lite (MOBIDB_LITE); mobidb-lite (MOBIDB_LITE); PTHR35490 (PANTHER)	no GO terms	no GO terms
HY10003_c2_g1_i3	hypothetical protein CICLE_v10025466mg	240	20	1.06219e-09	95.95	3	P:GO:0000105; F:GO:0003949; C:GO:0016021	P:histidine biosynthetic process; F:1-(5-phosphoribosyl)-5-[(5-phosphoribosylamino)methylideneamino]imidazole-4-carboxamide isomerase activity; C:integral component of membrane	EC:5.3.1.16	1-(5-phosphoribosyl)-5-	no IPS match	no IPS match	no IPS match
HY10003_c2_g1_i4	maf-like protein	1814	20	0	78.3	1	C:GO:0016021	C:integral component of membrane			mobidb-lite (MOBIDB_LITE); mobidb-lite (MOBIDB_LITE); PTHR35490 (PANTHER)	no GO terms	no GO terms
HY10003_c2_g1_i5	maf-like protein	2666	20	0	77.9	1	C:GO:0016021	C:integral component of membrane			mobidb-lite (MOBIDB_LITE); mobidb-lite (MOBIDB_LITE); mobidb-lite (MOBIDB_LITE); PTHR35490 (PANTHER)	no GO terms	no GO terms
HY10003_c2_g1_i6	maf-like protein	1835	20	0	78.8	1	C:GO:0016021	C:integral component of membrane			mobidb-lite (MOBIDB_LITE); mobidb-lite (MOBIDB_LITE); mobidb-lite (MOBIDB_LITE); mobidb-lite (MOBIDB_LITE); PTHR35490 (PANTHER)	no GO terms	no GO terms
HY10003_c2_g1_i7	maf-like protein	2029	20	0	78.8	1	C:GO:0016021	C:integral component of membrane			mobidb-lite (MOBIDB_LITE); mobidb-lite (MOBIDB_LITE); mobidb-lite (MOBIDB_LITE); mobidb-lite (MOBIDB_LITE); PTHR35490 (PANTHER)	no GO terms	no GO terms
HY10003_c2_g2_i1	nuclear transcription factor Y subunit A-7-like isoform X1	1411	20	4.00846e-26	89.85	4	F:GO:0003677; F:GO:0003700; P:GO:0006355; C:GO:0016602	F:DNA binding; F:DNA binding transcription factor activity; P:regulation of transcription, DNA-templated; C:CCAAT-binding factor complex			mobidb-lite (MOBIDB_LITE); IPR001289 (PANTHER); PTHR12632:SF18 (PANTHER)	F:GO:0003700; P:GO:0006355	F:DNA binding transcription factor activity; P:regulation of transcription, DNA-templated
HY10003_c2_g2_i10	nuclear transcription factor Y subunit A-7	1976	20	1.80701e-141	91.75	4	F:GO:0003677; F:GO:0003700; P:GO:0006355; C:GO:0016602	F:DNA binding; F:DNA binding transcription factor activity; P:regulation of transcription, DNA-templated; C:CCAAT-binding factor complex			IPR001289 (PRINTS); IPR001289 (PFAM); mobidb-lite (MOBIDB_LITE); mobidb-lite (MOBIDB_LITE); PTHR12632:SF18 (PANTHER); IPR001289 (PANTHER); IPR001289 (PROSITE_PROFILES)	F:GO:0003700; P:GO:0006355	F:DNA binding transcription factor activity; P:regulation of transcription, DNA-templated
HY10003_c2_g2_i11	nuclear transcription factor Y subunit A-7-like isoform X1	1150	20	2.17525e-40	84.75	4	F:GO:0003677; F:GO:0003700; P:GO:0006355; C:GO:0016602	F:DNA binding; F:DNA binding transcription factor activity; P:regulation of transcription, DNA-templated; C:CCAAT-binding factor complex			mobidb-lite (MOBIDB_LITE)	no GO terms	no GO terms
HY10003_c2_g2_i12	---NA---	326									no IPS match	no IPS match	no IPS match
HY10003_c2_g2_i13	nuclear transcription factor Y subunit A-7-like isoform X3	201	20	3.28786e-13	99	4	F:GO:0003677; F:GO:0003700; P:GO:0006355; C:GO:0016602	F:DNA binding; F:DNA binding transcription factor activity; P:regulation of transcription, DNA-templated; C:CCAAT-binding factor complex			IPR001289 (PANTHER); PTHR12632:SF29 (PANTHER); IPR001289 (PROSITE_PROFILES)	F:GO:0003700; P:GO:0006355	F:DNA binding transcription factor activity; P:regulation of transcription, DNA-templated
HY10003_c2_g2_i14	nuclear transcription factor Y subunit A-7	2829	20	1.5548e-107	91.55	4	F:GO:0003677; F:GO:0003700; P:GO:0006355; C:GO:0016602	F:DNA binding; F:DNA binding transcription factor activity; P:regulation of transcription, DNA-templated; C:CCAAT-binding factor complex			IPR001289 (PRINTS); IPR001289 (PFAM); mobidb-lite (MOBIDB_LITE); mobidb-lite (MOBIDB_LITE); IPR001289 (PANTHER); PTHR12632:SF18 (PANTHER); IPR001289 (PROSITE_PROFILES)	F:GO:0003700; P:GO:0006355	F:DNA binding transcription factor activity; P:regulation of transcription, DNA-templated
HY10003_c2_g2_i15	nuclear transcription factor Y subunit A-7-like isoform X1	2369	20	6.15627e-79	91.55	4	F:GO:0003677; F:GO:0003700; P:GO:0006355; C:GO:0016602	F:DNA binding; F:DNA binding transcription factor activity; P:regulation of transcription, DNA-templated; C:CCAAT-binding factor complex			IPR001289 (PFAM); mobidb-lite (MOBIDB_LITE); IPR001289 (PANTHER); PTHR12632:SF18 (PANTHER); IPR001289 (PROSITE_PROFILES)	F:GO:0003700; P:GO:0006355	F:DNA binding transcription factor activity; P:regulation of transcription, DNA-templated
HY10003_c2_g2_i2	nuclear transcription factor Y subunit A-7 isoform X2	778	10	2.60423e-10	91.6	4	F:GO:0003677; F:GO:0003700; P:GO:0006355; C:GO:0016602	F:DNA binding; F:DNA binding transcription factor activity; P:regulation of transcription, DNA-templated; C:CCAAT-binding factor complex			mobidb-lite (MOBIDB_LITE)	no GO terms	no GO terms
HY10003_c2_g2_i3	nuclear transcription factor Y subunit A-7-like isoform X1	1421	20	2.39205e-93	92.8	4	F:GO:0003677; F:GO:0003700; P:GO:0006355; C:GO:0016602	F:DNA binding; F:DNA binding transcription factor activity; P:regulation of transcription, DNA-templated; C:CCAAT-binding factor complex			IPR001289 (PFAM); mobidb-lite (MOBIDB_LITE); PTHR12632:SF18 (PANTHER); IPR001289 (PANTHER); IPR001289 (PROSITE_PROFILES)	F:GO:0003700; P:GO:0006355	F:DNA binding transcription factor activity; P:regulation of transcription, DNA-templated
HY10003_c2_g2_i4	---NA---	395									no IPS match	no IPS match	no IPS match
HY10003_c2_g2_i5	nuclear transcription factor Y subunit A-7-like isoform X1	768	20	8.41782e-46	90.05	4	F:GO:0003677; F:GO:0003700; P:GO:0006355; C:GO:0016602	F:DNA binding; F:DNA binding transcription factor activity; P:regulation of transcription, DNA-templated; C:CCAAT-binding factor complex			mobidb-lite (MOBIDB_LITE); PTHR12632:SF18 (PANTHER); IPR001289 (PANTHER)	F:GO:0003700; P:GO:0006355	F:DNA binding transcription factor activity; P:regulation of transcription, DNA-templated
HY10003_c2_g2_i6	---NA---	890									no IPS match	no IPS match	no IPS match
HY10003_c2_g2_i7	nuclear transcription factor Y subunit A-7 isoform X1	1118	5	5.3514e-05	96.8	4	F:GO:0003677; F:GO:0003700; P:GO:0006355; C:GO:0016602	F:DNA binding; F:DNA binding transcription factor activity; P:regulation of transcription, DNA-templated; C:CCAAT-binding factor complex			no IPS match	no IPS match	no IPS match
HY10003_c2_g2_i8	nuclear transcription factor Y subunit A-7-like isoform X1	1389	20	1.11507e-39	84.95	4	F:GO:0003677; F:GO:0003700; P:GO:0006355; C:GO:0016602	F:DNA binding; F:DNA binding transcription factor activity; P:regulation of transcription, DNA-templated; C:CCAAT-binding factor complex			mobidb-lite (MOBIDB_LITE)	no GO terms	no GO terms
HY10003_c2_g2_i9	---NA---	588									no IPS match	no IPS match	no IPS match
HY10003_c2_g3_i1	---NA---	279									no IPS match	no IPS match	no IPS match
HY10003_c2_g3_i2	---NA---	347									no IPS match	no IPS match	no IPS match
HY10003_c3_g1_i1	phosphatidylinositol N-acetylglucosaminyltransferase subunit P-like	271	13	1.27728e-06	95.08	6	P:GO:0006506; C:GO:0016020; C:GO:0016021; F:GO:0016740; F:GO:0016757; F:GO:0017176	P:GPI anchor biosynthetic process; C:membrane; C:integral component of membrane; F:transferase activity; F:transferase activity, transferring glycosyl groups; F:phosphatidylinositol N-acetylglucosaminyltransferase activity			no IPS match	no IPS match	no IPS match
HY10003_c4_g1_i1	---NA---	372									mobidb-lite (MOBIDB_LITE)	no GO terms	no GO terms
HY10003_c5_g1_i1	---NA---	266									no IPS match	no IPS match	no IPS match
HY10003_c6_g1_i1	---NA---	517									no IPS match	no IPS match	no IPS match
HY10004_c0_g1_i1	probable thimet oligopeptidase isoform X1	3540	20	0	93.55	4	F:GO:0004222; P:GO:0006508; C:GO:0016021; F:GO:0046872	F:metalloendopeptidase activity; P:proteolysis; C:integral component of membrane; F:metal ion binding	EC:3.4.24	Acting on peptide bonds (peptidases)	IPR024079 (G3DSA:3.40.390.GENE3D); IPR001567 (PFAM); PTHR11804:SF40 (PANTHER); PTHR11804 (PANTHER); SSF55486 (SUPERFAMILY)	F:GO:0004222; P:GO:0006508; F:GO:0008237	F:metalloendopeptidase activity; P:proteolysis; F:metallopeptidase activity
HY10004_c0_g1_i10	probable thimet oligopeptidase	3957	20	0	93.15	4	F:GO:0004222; P:GO:0006508; C:GO:0016021; F:GO:0046872	F:metalloendopeptidase activity; P:proteolysis; C:integral component of membrane; F:metal ion binding	EC:3.4.24	Acting on peptide bonds (peptidases)	G3DSA:1.10.1370.10 (GENE3D); IPR001567 (PFAM); PTHR11804 (PANTHER); PTHR11804:SF40 (PANTHER); SSF55486 (SUPERFAMILY)	F:GO:0004222; P:GO:0006508	F:metalloendopeptidase activity; P:proteolysis
HY10004_c0_g1_i11	probable thimet oligopeptidase	1190	20	5.57186e-143	94.1	4	F:GO:0004222; P:GO:0006508; C:GO:0016021; F:GO:0046872	F:metalloendopeptidase activity; P:proteolysis; C:integral component of membrane; F:metal ion binding	EC:3.4.24	Acting on peptide bonds (peptidases)	G3DSA:1.10.1370.10 (GENE3D); IPR001567 (PFAM); PTHR11804:SF40 (PANTHER); PTHR11804 (PANTHER); SSF55486 (SUPERFAMILY)	F:GO:0004222; P:GO:0006508	F:metalloendopeptidase activity; P:proteolysis
HY10004_c0_g1_i12	probable thimet oligopeptidase isoform X1	2059	20	0	89.3	4	F:GO:0004222; P:GO:0006508; C:GO:0016021; F:GO:0046872	F:metalloendopeptidase activity; P:proteolysis; C:integral component of membrane; F:metal ion binding	EC:3.4.24	Acting on peptide bonds (peptidases)	IPR024080 (G3DSA:1.20.1050.GENE3D); IPR001567 (PFAM); G3DSA:1.10.1370.10 (GENE3D); mobidb-lite (MOBIDB_LITE); PTHR11804 (PANTHER); PTHR11804:SF40 (PANTHER); SSF55486 (SUPERFAMILY)	F:GO:0004222; P:GO:0006508	F:metalloendopeptidase activity; P:proteolysis
HY10004_c0_g1_i13	probable thimet oligopeptidase isoform X1	2850	20	0	89.3	4	F:GO:0004222; P:GO:0006508; C:GO:0016021; F:GO:0046872	F:metalloendopeptidase activity; P:proteolysis; C:integral component of membrane; F:metal ion binding	EC:3.4.24	Acting on peptide bonds (peptidases)	IPR024080 (G3DSA:1.20.1050.GENE3D); IPR001567 (PFAM); G3DSA:1.10.1370.10 (GENE3D); mobidb-lite (MOBIDB_LITE); PTHR11804 (PANTHER); PTHR11804:SF40 (PANTHER); SSF55486 (SUPERFAMILY)	F:GO:0004222; P:GO:0006508	F:metalloendopeptidase activity; P:proteolysis
HY10004_c0_g1_i2	probable thimet oligopeptidase isoform X1	3813	20	0	92.9	4	F:GO:0004222; P:GO:0006508; C:GO:0016021; F:GO:0046872	F:metalloendopeptidase activity; P:proteolysis; C:integral component of membrane; F:metal ion binding	EC:3.4.24	Acting on peptide bonds (peptidases)	IPR001567 (PFAM); G3DSA:1.10.1370.10 (GENE3D); IPR024080 (G3DSA:1.20.1050.GENE3D); mobidb-lite (MOBIDB_LITE); PTHR11804 (PANTHER); PTHR11804:SF40 (PANTHER); SSF55486 (SUPERFAMILY)	F:GO:0004222; P:GO:0006508	F:metalloendopeptidase activity; P:proteolysis
HY10004_c0_g1_i3	probable thimet oligopeptidase isoform X1	3731	20	0	93.15	4	F:GO:0004222; P:GO:0006508; C:GO:0016021; F:GO:0046872	F:metalloendopeptidase activity; P:proteolysis; C:integral component of membrane; F:metal ion binding	EC:3.4.24	Acting on peptide bonds (peptidases)	IPR001567 (PFAM); G3DSA:1.10.1370.10 (GENE3D); IPR024080 (G3DSA:1.20.1050.GENE3D); mobidb-lite (MOBIDB_LITE); PTHR11804 (PANTHER); PTHR11804:SF40 (PANTHER); SSF55486 (SUPERFAMILY)	F:GO:0004222; P:GO:0006508	F:metalloendopeptidase activity; P:proteolysis
HY10004_c0_g1_i4	probable thimet oligopeptidase isoform X1	2471	20	0	87.75	4	F:GO:0004222; P:GO:0006508; C:GO:0016021; F:GO:0046872	F:metalloendopeptidase activity; P:proteolysis; C:integral component of membrane; F:metal ion binding	EC:3.4.24	Acting on peptide bonds (peptidases)	IPR001567 (PFAM); G3DSA:1.10.1370.10 (GENE3D); IPR024080 (G3DSA:1.20.1050.GENE3D); mobidb-lite (MOBIDB_LITE); PTHR11804 (PANTHER); PTHR11804:SF40 (PANTHER); SSF55486 (SUPERFAMILY)	F:GO:0004222; P:GO:0006508	F:metalloendopeptidase activity; P:proteolysis
HY10004_c0_g1_i5	probable thimet oligopeptidase isoform X1	3780	20	0	92.65	4	F:GO:0004222; P:GO:0006508; C:GO:0016021; F:GO:0046872	F:metalloendopeptidase activity; P:proteolysis; C:integral component of membrane; F:metal ion binding	EC:3.4.24	Acting on peptide bonds (peptidases)	G3DSA:1.10.1370.10 (GENE3D); IPR001567 (PFAM); PTHR11804 (PANTHER); PTHR11804:SF40 (PANTHER); SSF55486 (SUPERFAMILY)	F:GO:0004222; P:GO:0006508	F:metalloendopeptidase activity; P:proteolysis
HY10004_c0_g1_i6	probable thimet oligopeptidase isoform X1	3401	20	0	89.3	4	F:GO:0004222; P:GO:0006508; C:GO:0016021; F:GO:0046872	F:metalloendopeptidase activity; P:proteolysis; C:integral component of membrane; F:metal ion binding	EC:3.4.24	Acting on peptide bonds (peptidases)	IPR024080 (G3DSA:1.20.1050.GENE3D); IPR001567 (PFAM); G3DSA:1.10.1370.10 (GENE3D); mobidb-lite (MOBIDB_LITE); PTHR11804 (PANTHER); PTHR11804:SF40 (PANTHER); SSF55486 (SUPERFAMILY)	F:GO:0004222; P:GO:0006508	F:metalloendopeptidase activity; P:proteolysis
HY10004_c0_g1_i7	probable thimet oligopeptidase isoform X1	3210	20	0	90.8	4	F:GO:0004222; P:GO:0006508; C:GO:0016021; F:GO:0046872	F:metalloendopeptidase activity; P:proteolysis; C:integral component of membrane; F:metal ion binding	EC:3.4.24	Acting on peptide bonds (peptidases)	IPR001567 (PFAM); IPR024080 (G3DSA:1.20.1050.GENE3D); G3DSA:1.10.1370.10 (GENE3D); mobidb-lite (MOBIDB_LITE); PTHR11804 (PANTHER); PTHR11804:SF40 (PANTHER); cd06455 (CDD); SSF55486 (SUPERFAMILY)	F:GO:0004222; P:GO:0006508	F:metalloendopeptidase activity; P:proteolysis
HY10004_c0_g1_i8	probable thimet oligopeptidase isoform X1	1868	20	0	89.3	4	F:GO:0004222; P:GO:0006508; C:GO:0016021; F:GO:0046872	F:metalloendopeptidase activity; P:proteolysis; C:integral component of membrane; F:metal ion binding	EC:3.4.24	Acting on peptide bonds (peptidases)	IPR001567 (PFAM); IPR024080 (G3DSA:1.20.1050.GENE3D); IPR024079 (G3DSA:3.40.390.GENE3D); mobidb-lite (MOBIDB_LITE); PTHR11804:SF40 (PANTHER); PTHR11804 (PANTHER); SSF55486 (SUPERFAMILY)	F:GO:0004222; P:GO:0006508; F:GO:0008237	F:metalloendopeptidase activity; P:proteolysis; F:metallopeptidase activity
HY10004_c0_g1_i9	probable thimet oligopeptidase isoform X1	3262	20	0	87.75	4	F:GO:0004222; P:GO:0006508; C:GO:0016021; F:GO:0046872	F:metalloendopeptidase activity; P:proteolysis; C:integral component of membrane; F:metal ion binding	EC:3.4.24	Acting on peptide bonds (peptidases)	IPR001567 (PFAM); G3DSA:1.10.1370.10 (GENE3D); IPR024080 (G3DSA:1.20.1050.GENE3D); mobidb-lite (MOBIDB_LITE); PTHR11804 (PANTHER); PTHR11804:SF40 (PANTHER); SSF55486 (SUPERFAMILY)	F:GO:0004222; P:GO:0006508	F:metalloendopeptidase activity; P:proteolysis
HY10005_c0_g1_i1	ATPase family AAA domain-containing protein 1-like	564	20	4.82917e-96	80.05	3	F:GO:0005524; C:GO:0016021; F:GO:0016787	F:ATP binding; C:integral component of membrane; F:hydrolase activity			PS51257 (PROSITE_PROFILES)	no GO terms	no GO terms
HY10005_c0_g1_i2	ATPase family AAA domain-containing protein 1-like	1408	20	0	92.15	3	F:GO:0005524; C:GO:0016021; F:GO:0016787	F:ATP binding; C:integral component of membrane; F:hydrolase activity			IPR003959 (PFAM); G3DSA:3.40.50.300 (GENE3D); G3DSA:1.10.8.60 (GENE3D); mobidb-lite (MOBIDB_LITE); PTHR23074:SF20 (PANTHER); PTHR23074 (PANTHER); PS51257 (PROSITE_PROFILES); cd00009 (CDD); IPR027417 (SUPERFAMILY)	F:GO:0005524	F:ATP binding
HY10005_c0_g1_i3	ATPase family AAA domain-containing protein 1-like	1746	20	0	96.9	3	F:GO:0005524; C:GO:0016021; F:GO:0016787	F:ATP binding; C:integral component of membrane; F:hydrolase activity			IPR003959 (PFAM); G3DSA:3.40.50.300 (GENE3D); G3DSA:1.10.8.60 (GENE3D); PTHR23074:SF20 (PANTHER); PTHR23074 (PANTHER); PS51257 (PROSITE_PROFILES); cd00009 (CDD); IPR027417 (SUPERFAMILY)	F:GO:0005524	F:ATP binding
HY10005_c0_g1_i4	ATPase family AAA domain-containing protein 1-like	1972	20	0	94.4	3	F:GO:0005524; C:GO:0016021; F:GO:0016787	F:ATP binding; C:integral component of membrane; F:hydrolase activity			G3DSA:3.40.50.300 (GENE3D); G3DSA:1.10.8.60 (GENE3D); IPR003959 (PFAM); PTHR23074 (PANTHER); PTHR23074:SF20 (PANTHER); PS51257 (PROSITE_PROFILES); cd00009 (CDD); IPR027417 (SUPERFAMILY)	F:GO:0005524	F:ATP binding
HY10005_c0_g1_i5	ATPase family AAA domain-containing protein 1-like	1390	20	0	94.4	3	F:GO:0005524; C:GO:0016021; F:GO:0016787	F:ATP binding; C:integral component of membrane; F:hydrolase activity			IPR003959 (PFAM); G3DSA:1.10.8.60 (GENE3D); G3DSA:3.40.50.300 (GENE3D); PTHR23074:SF20 (PANTHER); PTHR23074 (PANTHER); PS51257 (PROSITE_PROFILES); cd00009 (CDD); IPR027417 (SUPERFAMILY)	F:GO:0005524	F:ATP binding
HY10005_c0_g2_i1	ATPase family AAA domain-containing protein 1 isoform X2	589	20	3.40868e-10	97.95	4	F:GO:0005524; C:GO:0005634; C:GO:0016021; F:GO:0016887	F:ATP binding; C:nucleus; C:integral component of membrane; F:ATPase activity	EC:3.6.1.3; EC:3.6.1.15	Adenosinetriphosphatase; Nucleoside-triphosphate phosphatase	no IPS match	no IPS match	no IPS match
HY10006_c0_g1_i1	---NA---	478									no IPS match	no IPS match	no IPS match
HY10006_c0_g1_i2	---NA---	510									no IPS match	no IPS match	no IPS match
HY10006_c0_g2_i1	---NA---	862									no IPS match	no IPS match	no IPS match
HY10006_c1_g1_i1	---NA---	656									no IPS match	no IPS match	no IPS match
HY10006_c2_g1_i1	probable LRR receptor-like serine/threonine-protein kinase At4g08850	228	4	5.1446e-10	58.25	3	F:GO:0004672; F:GO:0005524; P:GO:0006468	F:protein kinase activity; F:ATP binding; P:protein phosphorylation			no IPS match	no IPS match	no IPS match
HY10006_c2_g1_i2	50S ribosomal protein L15	1220	20	1.39452e-06	82.3	5	F:GO:0003735; C:GO:0005762; C:GO:0005840; P:GO:0006412; C:GO:0015934	F:structural constituent of ribosome; C:mitochondrial large ribosomal subunit; C:ribosome; P:translation; C:large ribosomal subunit			no IPS match	no IPS match	no IPS match
HY10006_c2_g2_i1	hypothetical protein CICLE_v10014082mg	450	1	2.90956e-11	96	4	F:GO:0004672; F:GO:0005524; P:GO:0006468; C:GO:0016021	F:protein kinase activity; F:ATP binding; P:protein phosphorylation; C:integral component of membrane			no IPS match	no IPS match	no IPS match
HY10006_c3_g1_i1	---NA---	1241									no IPS match	no IPS match	no IPS match
HY10006_c3_g1_i2	---NA---	1259									no IPS match	no IPS match	no IPS match
HY10006_c3_g1_i3	---NA---	917									no IPS match	no IPS match	no IPS match
HY10006_c3_g1_i4	---NA---	899									no IPS match	no IPS match	no IPS match
HY10006_c4_g1_i1	50S ribosomal protein L15	1472	20	2.58545e-150	91.35	3	F:GO:0003735; C:GO:0005762; P:GO:0006412	F:structural constituent of ribosome; C:mitochondrial large ribosomal subunit; P:translation			IPR021131 (PFAM); G3DSA:3.100.10.10 (GENE3D); IPR005749 (TIGRFAM); mobidb-lite (MOBIDB_LITE); mobidb-lite (MOBIDB_LITE); IPR005749 (PANTHER); PTHR12934:SF12 (PANTHER); IPR030878 (HAMAP); IPR036227 (SUPERFAMILY)	F:GO:0003735; P:GO:0006412; C:GO:0015934	F:structural constituent of ribosome; P:translation; C:large ribosomal subunit
HY10006_c4_g1_i2	50S ribosomal protein L15	1530	20	3.28832e-103	88.55	3	F:GO:0003735; P:GO:0006412; C:GO:0015934	F:structural constituent of ribosome; P:translation; C:large ribosomal subunit			IPR021131 (PFAM); G3DSA:3.100.10.10 (GENE3D); IPR005749 (TIGRFAM); mobidb-lite (MOBIDB_LITE); PTHR12934:SF12 (PANTHER); IPR005749 (PANTHER); IPR030878 (HAMAP); IPR036227 (SUPERFAMILY)	F:GO:0003735; P:GO:0006412; C:GO:0015934	F:structural constituent of ribosome; P:translation; C:large ribosomal subunit
HY10006_c4_g2_i1	50S ribosomal protein L15	910	20	1.00489e-31	95.6	3	F:GO:0003735; P:GO:0006412; C:GO:0015934	F:structural constituent of ribosome; P:translation; C:large ribosomal subunit			G3DSA:3.100.10.10 (GENE3D); PTHR12934:SF12 (PANTHER); IPR005749 (PANTHER)	F:GO:0003735; P:GO:0006412; C:GO:0015934	F:structural constituent of ribosome; P:translation; C:large ribosomal subunit
HY10006_c5_g1_i1	Nuclear factor 1 A-type isoform 2	1038	20	3.51191e-142	94.25	4	P:GO:0006508; F:GO:0008233; P:GO:0009651; P:GO:0009737	P:proteolysis; F:peptidase activity; P:response to salt stress; P:response to abscisic acid			IPR010410 (PFAM); IPR010410 (PANTHER); PTHR31317:SF4 (PANTHER)	no GO terms	no GO terms
HY10006_c5_g1_i2	---NA---	1050									no IPS match	no IPS match	no IPS match
HY10006_c5_g1_i3	Nuclear factor 1 A-type isoform 2	1372	20	1.98678e-141	94.55	4	P:GO:0006508; F:GO:0008233; P:GO:0009651; P:GO:0009737	P:proteolysis; F:peptidase activity; P:response to salt stress; P:response to abscisic acid			IPR010410 (PFAM); IPR010410 (PANTHER); PTHR31317:SF4 (PANTHER)	no GO terms	no GO terms
HY10006_c5_g1_i4	Nuclear factor 1 A-type isoform 2	2187	20	0	92.5	4	P:GO:0006508; F:GO:0008233; P:GO:0009651; P:GO:0009737	P:proteolysis; F:peptidase activity; P:response to salt stress; P:response to abscisic acid			IPR010410 (PFAM); PTHR31317:SF4 (PANTHER); IPR010410 (PANTHER)	no GO terms	no GO terms
HY10006_c5_g1_i5	Nuclear factor 1 A-type isoform 2	1356	20	1.60664e-141	94.55	4	P:GO:0006508; F:GO:0008233; P:GO:0009651; P:GO:0009737	P:proteolysis; F:peptidase activity; P:response to salt stress; P:response to abscisic acid			IPR010410 (PFAM); IPR010410 (PANTHER); PTHR31317:SF4 (PANTHER)	no GO terms	no GO terms
HY10006_c5_g1_i6	hypothetical protein CICLE_v10031611mg	405	20	4.1438e-30	91.6	2	P:GO:0009651; P:GO:0009737	P:response to salt stress; P:response to abscisic acid			IPR010410 (PFAM); IPR010410 (PANTHER); PTHR31317:SF4 (PANTHER)	no GO terms	no GO terms
HY10006_c5_g1_i7	hypothetical protein CICLE_v10031611mg	638	20	5.69363e-29	91.75	2	P:GO:0009651; P:GO:0009737	P:response to salt stress; P:response to abscisic acid			IPR010410 (PFAM); IPR010410 (PANTHER); PTHR31317:SF4 (PANTHER)	no GO terms	no GO terms
HY10006_c5_g1_i8	Nuclear factor 1 A-type isoform 2	2205	20	0	92.5	4	P:GO:0006508; F:GO:0008233; P:GO:0009651; P:GO:0009737	P:proteolysis; F:peptidase activity; P:response to salt stress; P:response to abscisic acid			IPR010410 (PFAM); PTHR31317:SF4 (PANTHER); IPR010410 (PANTHER)	no GO terms	no GO terms
HY10006_c5_g2_i1	PREDICTED: uncharacterized protein LOC107177972	692	1	4.06829e-09	97						no IPS match	no IPS match	no IPS match
HY10006_c5_g2_i2	PREDICTED: uncharacterized protein LOC107177972	830	1	0.000601981	100						no IPS match	no IPS match	no IPS match
HY10006_c5_g3_i1	---NA---	567									no IPS match	no IPS match	no IPS match
HY10006_c5_g4_i1	---NA---	400									no IPS match	no IPS match	no IPS match
HY10006_c5_g5_i1	PREDICTED: uncharacterized protein LOC107177972	308	1	1.75217e-14	90						no IPS match	no IPS match	no IPS match
HY10006_c5_g6_i1	DNA (cytosine-5)-methyltransferase DRM2	269	3	6.16425e-13	100	2	P:GO:0006306; C:GO:0016021	P:DNA methylation; C:integral component of membrane			mobidb-lite (MOBIDB_LITE)	no GO terms	no GO terms
HY10006_c6_g1_i1	hypothetical protein CISIN_1g0345511mg, partial	283	1	1.95374e-07	71						mobidb-lite (MOBIDB_LITE)	no GO terms	no GO terms
HY10007_c0_g1_i1	pentatricopeptide repeat-containing protein At5g48730, chloroplastic	1717	20	0	90.95						G3DSA:3.30.2320.10 (GENE3D); IPR002885 (TIGRFAM); IPR002885 (PFAM); IPR002885 (PFAM); IPR002885 (PFAM); PTHR24015:SF664 (PANTHER); PTHR24015 (PANTHER); IPR002885 (PROSITE_PROFILES); IPR002885 (PROSITE_PROFILES); IPR002885 (PROSITE_PROFILES); IPR002885 (PROSITE_PROFILES); IPR002885 (PROSITE_PROFILES); IPR002885 (PROSITE_PROFILES); IPR002885 (PROSITE_PROFILES); IPR002885 (PROSITE_PROFILES); IPR0028…	no GO terms	no GO terms
HY10007_c0_g1_i2	pentatricopeptide repeat-containing protein At5g48730, chloroplastic	2260	20	0	87.35						IPR002885 (PFAM); IPR002885 (TIGRFAM); G3DSA:3.30.2320.10 (GENE3D); IPR002885 (PFAM); IPR002885 (PFAM); mobidb-lite (MOBIDB_LITE); PTHR24015:SF664 (PANTHER); PTHR24015 (PANTHER); IPR002885 (PROSITE_PROFILES); IPR002885 (PROSITE_PROFILES); IPR002885 (PROSITE_PROFILES); IPR002885 (PROSITE_PROFILES); IPR002885 (PROSITE_PROFILES); IPR002885 (PROSITE_PROFILES); IPR002885 (PROSITE_PROFILES); IPR002885 …	no GO terms	no GO terms
HY10007_c0_g1_i3	pentatricopeptide repeat-containing protein At5g48730, chloroplastic	1853	20	0	80.45						IPR002885 (PFAM); G3DSA:3.30.2320.10 (GENE3D); IPR002885 (TIGRFAM); IPR002885 (PFAM); PTHR24015:SF664 (PANTHER); PTHR24015 (PANTHER); IPR002885 (PROSITE_PROFILES); IPR002885 (PROSITE_PROFILES); IPR002885 (PROSITE_PROFILES); IPR002885 (PROSITE_PROFILES); IPR002885 (PROSITE_PROFILES); IPR002885 (PROSITE_PROFILES)	no GO terms	no GO terms
HY10007_c0_g1_i4	pentatricopeptide repeat-containing protein At5g48730, chloroplastic	2419	20	0	78.6						IPR002885 (PFAM); IPR002885 (PFAM); G3DSA:3.30.2320.10 (GENE3D); IPR002885 (PFAM); IPR002885 (TIGRFAM); mobidb-lite (MOBIDB_LITE); PTHR24015:SF664 (PANTHER); PTHR24015 (PANTHER); IPR002885 (PROSITE_PROFILES); IPR002885 (PROSITE_PROFILES); IPR002885 (PROSITE_PROFILES); IPR002885 (PROSITE_PROFILES)	no GO terms	no GO terms
HY10007_c0_g1_i5	pentatricopeptide repeat-containing protein At5g48730, chloroplastic	2382	20	0	90.9						IPR002885 (PFAM); IPR002885 (PFAM); IPR002885 (TIGRFAM); IPR002885 (PFAM); G3DSA:3.30.2320.10 (GENE3D); PTHR24015 (PANTHER); PTHR24015:SF664 (PANTHER); IPR002885 (PROSITE_PROFILES); IPR002885 (PROSITE_PROFILES); IPR002885 (PROSITE_PROFILES); IPR002885 (PROSITE_PROFILES); IPR002885 (PROSITE_PROFILES); IPR002885 (PROSITE_PROFILES); IPR002885 (PROSITE_PROFILES); IPR002885 (PROSITE_PROFILES); IPR0028…	no GO terms	no GO terms
HY10007_c0_g1_i6	pentatricopeptide repeat-containing protein At5g48730, chloroplastic	2092	20	0	87.35						IPR002885 (PFAM); IPR002885 (TIGRFAM); G3DSA:3.30.2320.10 (GENE3D); IPR002885 (PFAM); IPR002885 (PFAM); mobidb-lite (MOBIDB_LITE); PTHR24015:SF664 (PANTHER); PTHR24015 (PANTHER); IPR002885 (PROSITE_PROFILES); IPR002885 (PROSITE_PROFILES); IPR002885 (PROSITE_PROFILES); IPR002885 (PROSITE_PROFILES); IPR002885 (PROSITE_PROFILES); IPR002885 (PROSITE_PROFILES); IPR002885 (PROSITE_PROFILES); IPR002885 …	no GO terms	no GO terms
HY10007_c0_g1_i7	pentatricopeptide repeat-containing protein At5g48730, chloroplastic	2214	20	0	90.9						IPR002885 (PFAM); IPR002885 (PFAM); IPR002885 (TIGRFAM); IPR002885 (PFAM); G3DSA:3.30.2320.10 (GENE3D); PTHR24015 (PANTHER); PTHR24015:SF664 (PANTHER); IPR002885 (PROSITE_PROFILES); IPR002885 (PROSITE_PROFILES); IPR002885 (PROSITE_PROFILES); IPR002885 (PROSITE_PROFILES); IPR002885 (PROSITE_PROFILES); IPR002885 (PROSITE_PROFILES); IPR002885 (PROSITE_PROFILES); IPR002885 (PROSITE_PROFILES); IPR0028…	no GO terms	no GO terms
HY10008_c0_g1_i1	putative disease resistance RPP13-like protein 1	486	20	3.74387e-88	86.6						IPR036941 (G3DSA:3.80.20.GENE3D); IPR032675 (G3DSA:3.80.10.GENE3D); PTHR43930 (PANTHER); SSF52047 (SUPERFAMILY)	no GO terms	no GO terms
HY10008_c0_g1_i10	putative disease resistance protein At3g14460	242	20	4.51541e-42	89.4	2	P:GO:0006952; F:GO:0043531	P:defense response; F:ADP binding			IPR032675 (G3DSA:3.80.10.GENE3D); SSF52047 (SUPERFAMILY)	no GO terms	no GO terms
HY10008_c0_g1_i11	putative disease resistance RPP13-like protein 1	300	20	4.21021e-53	79	2	P:GO:0006952; F:GO:0043531	P:defense response; F:ADP binding			IPR036941 (G3DSA:3.80.20.GENE3D); PTHR43930 (PANTHER); SSF52047 (SUPERFAMILY)	no GO terms	no GO terms
HY10008_c0_g1_i12	putative disease resistance RPP13-like protein 1	527	20	3.95057e-99	85.75						IPR032675 (G3DSA:3.80.10.GENE3D); PTHR43930 (PANTHER); SSF52047 (SUPERFAMILY)	no GO terms	no GO terms
HY10008_c0_g1_i13	putative disease resistance RPP13-like protein 1	375	20	6.33163e-61	87.45	2	P:GO:0006952; F:GO:0043531	P:defense response; F:ADP binding			IPR032675 (G3DSA:3.80.10.GENE3D); PTHR43930 (PANTHER); SSF52047 (SUPERFAMILY)	no GO terms	no GO terms
HY10008_c0_g1_i14	putative disease resistance RPP13-like protein 1	363	20	2.29662e-63	85.9	2	P:GO:0006952; F:GO:0043531	P:defense response; F:ADP binding			IPR036941 (G3DSA:3.80.20.GENE3D); PTHR43930 (PANTHER); SSF52047 (SUPERFAMILY)	no GO terms	no GO terms
HY10008_c0_g1_i15	putative disease resistance RPP13-like protein 1	256	20	3.33855e-42	88.45						IPR036941 (G3DSA:3.80.20.GENE3D); SSF52047 (SUPERFAMILY)	no GO terms	no GO terms
HY10008_c0_g1_i16	putative disease resistance RPP13-like protein 1	330	20	2.24341e-57	87.35	2	P:GO:0006952; F:GO:0043531	P:defense response; F:ADP binding			IPR036941 (G3DSA:3.80.20.GENE3D); PTHR43930 (PANTHER); SSF52047 (SUPERFAMILY)	no GO terms	no GO terms
HY10008_c0_g1_i17	putative disease resistance RPP13-like protein 1 isoform X2	235	20	1.14047e-37	86.75						IPR036941 (G3DSA:3.80.20.GENE3D)	no GO terms	no GO terms
HY10008_c0_g1_i18	putative disease resistance protein At3g14460	269	20	1.92144e-43	88	2	P:GO:0006952; F:GO:0043531	P:defense response; F:ADP binding			IPR036941 (G3DSA:3.80.20.GENE3D); PTHR43930 (PANTHER); SSF52047 (SUPERFAMILY)	no GO terms	no GO terms
HY10008_c0_g1_i2	putative disease resistance RPP13-like protein 1	591	20	5.60998e-109	84.6	2	P:GO:0006952; F:GO:0043531	P:defense response; F:ADP binding			IPR032675 (G3DSA:3.80.10.GENE3D); IPR032675 (G3DSA:3.80.10.GENE3D); PTHR23155 (PANTHER); PTHR23155:SF672 (PANTHER); SSF52047 (SUPERFAMILY)	no GO terms	no GO terms
HY10008_c0_g1_i3	putative disease resistance RPP13-like protein 1	249	20	2.1264e-42	89.7	2	P:GO:0006952; F:GO:0043531	P:defense response; F:ADP binding			IPR032675 (G3DSA:3.80.10.GENE3D); SSF52047 (SUPERFAMILY)	no GO terms	no GO terms
HY10008_c0_g1_i4	putative disease resistance protein At3g14460	363	20	3.86338e-62	84.4						IPR032675 (G3DSA:3.80.10.GENE3D); PTHR23155:SF672 (PANTHER); PTHR23155 (PANTHER); IPR032675 (SUPERFAMILY)	no GO terms	no GO terms
HY10008_c0_g1_i5	putative disease resistance RPP13-like protein 1	313	20	1.25615e-48	82.35	2	P:GO:0006952; F:GO:0043531	P:defense response; F:ADP binding			IPR036941 (G3DSA:3.80.20.GENE3D); PTHR43930 (PANTHER); PTHR43930:SF2 (PANTHER); SSF52047 (SUPERFAMILY)	no GO terms	no GO terms
HY10008_c0_g1_i6	putative disease resistance RPP13-like protein 1	527	20	8.29068e-101	85.4						IPR032675 (G3DSA:3.80.10.GENE3D); IPR036941 (G3DSA:3.80.20.GENE3D); PTHR43930 (PANTHER); SSF52047 (SUPERFAMILY)	no GO terms	no GO terms
HY10008_c0_g1_i7	putative disease resistance protein At3g14460	595	20	8.52826e-107	84.55						IPR032675 (G3DSA:3.80.10.GENE3D); IPR036941 (G3DSA:3.80.20.GENE3D); PTHR43930:SF1 (PANTHER); PTHR43930 (PANTHER); SSF52047 (SUPERFAMILY)	no GO terms	no GO terms
HY10008_c0_g1_i8	putative disease resistance RPP13-like protein 1	250	20	8.11911e-32	86.75	2	P:GO:0006952; F:GO:0043531	P:defense response; F:ADP binding			IPR032675 (G3DSA:3.80.10.GENE3D)	no GO terms	no GO terms
HY10008_c0_g1_i9	putative disease resistance RPP13-like protein 1	279	20	1.55632e-48	86.75	2	P:GO:0006952; F:GO:0043531	P:defense response; F:ADP binding			IPR032675 (G3DSA:3.80.10.GENE3D); PTHR23155 (PANTHER); PTHR23155:SF672 (PANTHER); IPR032675 (SUPERFAMILY)	no GO terms	no GO terms
HY10008_c0_g2_i1	putative disease resistance RPP13-like protein 1	228	20	1.75281e-26	84.15	2	P:GO:0006952; F:GO:0043531	P:defense response; F:ADP binding			IPR032675 (G3DSA:3.80.10.GENE3D)	no GO terms	no GO terms
HY10008_c0_g2_i10	putative disease resistance protein At3g14460	235	20	9.49478e-34	85.35						IPR032675 (G3DSA:3.80.10.GENE3D)	no GO terms	no GO terms
HY10008_c0_g2_i2	putative disease resistance protein At3g14460	203	20	3.00304e-25	82.3	2	P:GO:0006952; F:GO:0043531	P:defense response; F:ADP binding			IPR032675 (G3DSA:3.80.10.GENE3D)	no GO terms	no GO terms
HY10008_c0_g2_i3	putative disease resistance RPP13-like protein 1 isoform X2	225	20	4.35344e-27	88.45	2	P:GO:0006952; F:GO:0043531	P:defense response; F:ADP binding			IPR032675 (G3DSA:3.80.10.GENE3D)	no GO terms	no GO terms
HY10008_c0_g2_i4	putative disease resistance RPP13-like protein 1 isoform X2	223	20	5.71073e-28	86.1	2	P:GO:0006952; F:GO:0043531	P:defense response; F:ADP binding			IPR032675 (G3DSA:3.80.10.GENE3D)	no GO terms	no GO terms
HY10008_c0_g2_i5	putative disease resistance protein At3g14460	209	20	4.75339e-19	84.75	2	P:GO:0006952; F:GO:0043531	P:defense response; F:ADP binding			IPR032675 (G3DSA:3.80.10.GENE3D)	no GO terms	no GO terms
HY10008_c0_g2_i6	putative disease resistance RPP13-like protein 1 isoform X2	225	20	5.73198e-34	86.25	2	P:GO:0006952; F:GO:0043531	P:defense response; F:ADP binding			IPR032675 (G3DSA:3.80.10.GENE3D)	no GO terms	no GO terms
HY10008_c0_g2_i7	putative disease resistance protein At3g14460	222	20	1.03818e-32	85.5						IPR032675 (G3DSA:3.80.10.GENE3D)	no GO terms	no GO terms
HY10008_c0_g2_i8	putative disease resistance protein At3g14460	201	20	7.88737e-19	85.75	2	P:GO:0006952; F:GO:0043531	P:defense response; F:ADP binding			IPR032675 (G3DSA:3.80.10.GENE3D); mobidb-lite (MOBIDB_LITE)	no GO terms	no GO terms
HY10008_c0_g2_i9	putative disease resistance RPP13-like protein 1 isoform X2	228	20	2.04427e-27	85.5	2	P:GO:0006952; F:GO:0043531	P:defense response; F:ADP binding			IPR032675 (G3DSA:3.80.10.GENE3D)	no GO terms	no GO terms
HY10008_c0_g3_i1	putative disease resistance protein At3g14460	207	20	1.5929e-22	88.55	2	P:GO:0006952; F:GO:0043531	P:defense response; F:ADP binding			IPR036941 (G3DSA:3.80.20.GENE3D); SSF52047 (SUPERFAMILY)	no GO terms	no GO terms
HY10008_c1_g1_i1	---NA---	579									no IPS match	no IPS match	no IPS match
HY10009_c0_g1_i1	zinc finger protein ZAT4-like	2900	20	0	67.65	1	F:GO:0003676	F:nucleic acid binding			PF13912 (PFAM); G3DSA:2.10.69.10 (GENE3D); G3DSA:3.30.160.60 (GENE3D); G3DSA:3.30.160.60 (GENE3D); mobidb-lite (MOBIDB_LITE); mobidb-lite (MOBIDB_LITE); mobidb-lite (MOBIDB_LITE); PTHR26374:SF216 (PANTHER); PTHR26374 (PANTHER); IPR013087 (PROSITE_PROFILES); IPR013087 (PROSITE_PROFILES); IPR013087 (PROSITE_PROFILES); IPR036236 (SUPERFAMILY); IPR036236 (SUPERFAMILY)	F:GO:0003676	F:nucleic acid binding
HY1001_c0_g1_i1	vacuolar protein sorting-associated protein 29	321	20	1.95952e-46	97.1	9	P:GO:0001881; C:GO:0005771; C:GO:0005829; P:GO:0006623; F:GO:0008270; F:GO:0008565; C:GO:0030904; P:GO:0042147; C:GO:0043231	P:receptor recycling; C:multivesicular body; C:cytosol; P:protein targeting to vacuole; F:zinc ion binding; F:protein transporter activity; C:retromer complex; P:retrograde transport, endosome to Golgi; C:intracellular membrane-bounded organelle			no IPS match	no IPS match	no IPS match
HY10010_c0_g1_i1	---NA---	1524									no IPS match	no IPS match	no IPS match
HY10010_c0_g1_i2	---NA---	724									no IPS match	no IPS match	no IPS match
HY10010_c0_g1_i3	---NA---	1267									no IPS match	no IPS match	no IPS match
HY10011_c0_g1_i1	syntaxin-32	1571	20	0	87.35	6	F:GO:0005484; C:GO:0005622; P:GO:0006886; C:GO:0016021; P:GO:0016192; P:GO:0061025	F:SNAP receptor activity; C:intracellular; P:intracellular protein transport; C:integral component of membrane; P:vesicle-mediated transport; P:membrane fusion			IPR021538 (PFAM); G3DSA:1.20.58.70 (GENE3D); G3DSA:1.20.5.110 (GENE3D); IPR000727 (PFAM); mobidb-lite (MOBIDB_LITE); mobidb-lite (MOBIDB_LITE); PTHR19957:SF206 (PANTHER); PTHR19957 (PANTHER); IPR000727 (PROSITE_PROFILES); cd15844 (CDD); IPR010989 (SUPERFAMILY)	C:GO:0016020; P:GO:0016192	C:membrane; P:vesicle-mediated transport
HY10011_c0_g1_i2	syntaxin-32 isoform X1	1357	20	5.37243e-29	76.8	6	F:GO:0005484; C:GO:0005622; P:GO:0006886; C:GO:0016021; P:GO:0016192; P:GO:0061025	F:SNAP receptor activity; C:intracellular; P:intracellular protein transport; C:integral component of membrane; P:vesicle-mediated transport; P:membrane fusion			IPR021538 (PFAM); G3DSA:1.20.58.70 (GENE3D); mobidb-lite (MOBIDB_LITE); PTHR19957:SF206 (PANTHER); PTHR19957 (PANTHER)	no GO terms	no GO terms
HY10011_c0_g1_i3	syntaxin-32	1994	20	7.58277e-167	86.55	6	F:GO:0005484; C:GO:0005622; P:GO:0006886; C:GO:0016021; P:GO:0016192; P:GO:0061025	F:SNAP receptor activity; C:intracellular; P:intracellular protein transport; C:integral component of membrane; P:vesicle-mediated transport; P:membrane fusion			G3DSA:1.20.58.70 (GENE3D); IPR021538 (PFAM); mobidb-lite (MOBIDB_LITE); mobidb-lite (MOBIDB_LITE); PTHR19957:SF206 (PANTHER); PTHR19957 (PANTHER); IPR000727 (PROSITE_PROFILES); IPR010989 (SUPERFAMILY)	C:GO:0016020; P:GO:0016192	C:membrane; P:vesicle-mediated transport
HY10011_c1_g1_i1	hypothetical protein CICLE_v10010258mg, partial	2531	20	0	79.85	2	F:GO:0004565; P:GO:0005975	F:beta-galactosidase activity; P:carbohydrate metabolic process	EC:3.2.1.23	Beta-galactosidase	IPR001944 (PRINTS); IPR031330 (PFAM); G3DSA:3.20.20.80 (GENE3D); IPR008979 (G3DSA:2.60.120.GENE3D); IPR001944 (PANTHER); PTHR23421:SF74 (PANTHER); IPR008979 (SUPERFAMILY); IPR017853 (SUPERFAMILY)	F:GO:0004553; P:GO:0005975	F:hydrolase activity, hydrolyzing O-glycosyl compounds; P:carbohydrate metabolic process
HY10011_c1_g1_i2	Glyco_hydro_35 domain-containing protein/Gal_Lectin domain-containing protein	1242	20	2.60305e-178	78.05	2	F:GO:0004565; P:GO:0005975	F:beta-galactosidase activity; P:carbohydrate metabolic process	EC:3.2.1.23	Beta-galactosidase	IPR008979 (G3DSA:2.60.120.GENE3D); IPR008979 (G3DSA:2.60.120.GENE3D); IPR001944 (PANTHER); PTHR23421:SF74 (PANTHER); IPR008979 (SUPERFAMILY); IPR008979 (SUPERFAMILY)	F:GO:0004553; P:GO:0005975	F:hydrolase activity, hydrolyzing O-glycosyl compounds; P:carbohydrate metabolic process
HY10011_c1_g1_i3	beta-galactosidase-like	2454	20	0	79.1	2	F:GO:0004565; P:GO:0005975	F:beta-galactosidase activity; P:carbohydrate metabolic process	EC:3.2.1.23	Beta-galactosidase	IPR001944 (PRINTS); IPR031330 (PFAM); IPR008979 (G3DSA:2.60.120.GENE3D); G3DSA:3.20.20.80 (GENE3D); IPR008979 (G3DSA:2.60.120.GENE3D); IPR001944 (PANTHER); PTHR23421:SF74 (PANTHER); IPR008979 (SUPERFAMILY); IPR008979 (SUPERFAMILY); IPR017853 (SUPERFAMILY)	F:GO:0004553; P:GO:0005975	F:hydrolase activity, hydrolyzing O-glycosyl compounds; P:carbohydrate metabolic process
HY10011_c2_g1_i1	beta-galactosidase pBG(b)	1353	20	4.03649e-97	95.3	2	F:GO:0004565; P:GO:0005975	F:beta-galactosidase activity; P:carbohydrate metabolic process	EC:3.2.1.23	Beta-galactosidase	G3DSA:3.20.20.80 (GENE3D); IPR031330 (PFAM); IPR001944 (PANTHER); PTHR23421:SF63 (PANTHER); IPR017853 (SUPERFAMILY)	F:GO:0004553; P:GO:0005975	F:hydrolase activity, hydrolyzing O-glycosyl compounds; P:carbohydrate metabolic process
HY10011_c2_g1_i10	beta-galactosidase 1 isoform X2	224	20	2.13257e-24	91.25	3	F:GO:0004565; P:GO:0005975; F:GO:0030246	F:beta-galactosidase activity; P:carbohydrate metabolic process; F:carbohydrate binding	EC:3.2.1.23	Beta-galactosidase	IPR031330 (PFAM); G3DSA:3.20.20.80 (GENE3D); PTHR23421:SF74 (PANTHER); IPR001944 (PANTHER); IPR017853 (SUPERFAMILY)	F:GO:0004553; P:GO:0005975	F:hydrolase activity, hydrolyzing O-glycosyl compounds; P:carbohydrate metabolic process
HY10011_c2_g1_i2	hypothetical protein CISIN_1g004219mg	321	20	1.39006e-27	91.15	3	F:GO:0004565; P:GO:0005975; F:GO:0030246	F:beta-galactosidase activity; P:carbohydrate metabolic process; F:carbohydrate binding	EC:3.2.1.23	Beta-galactosidase	IPR001944 (PANTHER); PTHR23421:SF63 (PANTHER)	F:GO:0004553; P:GO:0005975	F:hydrolase activity, hydrolyzing O-glycosyl compounds; P:carbohydrate metabolic process
HY10011_c2_g1_i3	beta-galactosidase-like isoform X1	1957	20	0	95.6	3	F:GO:0004565; P:GO:0005975; F:GO:0030246	F:beta-galactosidase activity; P:carbohydrate metabolic process; F:carbohydrate binding	EC:3.2.1.23	Beta-galactosidase	IPR001944 (PRINTS); IPR031330 (PFAM); IPR008979 (G3DSA:2.60.120.GENE3D); G3DSA:3.20.20.80 (GENE3D); IPR001944 (PANTHER); PTHR23421:SF74 (PANTHER); IPR008979 (SUPERFAMILY); IPR017853 (SUPERFAMILY)	F:GO:0004553; P:GO:0005975	F:hydrolase activity, hydrolyzing O-glycosyl compounds; P:carbohydrate metabolic process
HY10011_c2_g1_i4	beta-galactosidase-like isoform X2	2157	20	1.16105e-128	96.6	3	F:GO:0004565; P:GO:0005975; F:GO:0030246	F:beta-galactosidase activity; P:carbohydrate metabolic process; F:carbohydrate binding	EC:3.2.1.23	Beta-galactosidase	IPR001944 (PRINTS); IPR031330 (PFAM); G3DSA:3.20.20.80 (GENE3D); IPR001944 (PANTHER); PTHR23421:SF74 (PANTHER); IPR017853 (SUPERFAMILY)	F:GO:0004553; P:GO:0005975	F:hydrolase activity, hydrolyzing O-glycosyl compounds; P:carbohydrate metabolic process
HY10011_c2_g1_i5	beta-galactosidase-like isoform X1	1265	20	7.93288e-94	75.7	2	F:GO:0004565; P:GO:0005975	F:beta-galactosidase activity; P:carbohydrate metabolic process	EC:3.2.1.23	Beta-galactosidase	IPR001944 (PRINTS); G3DSA:3.20.20.80 (GENE3D); IPR031330 (PFAM); IPR001944 (PANTHER); PTHR23421:SF74 (PANTHER); IPR017853 (SUPERFAMILY)	F:GO:0004553; P:GO:0005975	F:hydrolase activity, hydrolyzing O-glycosyl compounds; P:carbohydrate metabolic process
HY10011_c2_g1_i6	beta-galactosidase 3	1283	20	2.92007e-130	96.55	3	F:GO:0004565; P:GO:0005975; F:GO:0030246	F:beta-galactosidase activity; P:carbohydrate metabolic process; F:carbohydrate binding	EC:3.2.1.23	Beta-galactosidase	IPR001944 (PRINTS); IPR031330 (PFAM); G3DSA:3.20.20.80 (GENE3D); PTHR23421:SF79 (PANTHER); IPR001944 (PANTHER); IPR017853 (SUPERFAMILY)	F:GO:0004553; P:GO:0005975	F:hydrolase activity, hydrolyzing O-glycosyl compounds; P:carbohydrate metabolic process
HY10011_c2_g1_i7	beta-galactosidase-like isoform X2	2454	20	0	95.9	3	F:GO:0004565; P:GO:0005975; F:GO:0030246	F:beta-galactosidase activity; P:carbohydrate metabolic process; F:carbohydrate binding	EC:3.2.1.23	Beta-galactosidase	IPR001944 (PRINTS); IPR008979 (G3DSA:2.60.120.GENE3D); IPR031330 (PFAM); G3DSA:3.20.20.80 (GENE3D); IPR001944 (PANTHER); PTHR23421:SF74 (PANTHER); IPR008979 (SUPERFAMILY); IPR017853 (SUPERFAMILY)	F:GO:0004553; P:GO:0005975	F:hydrolase activity, hydrolyzing O-glycosyl compounds; P:carbohydrate metabolic process
HY10011_c2_g1_i8	beta-galactosidase 12	2659	20	1.87708e-165	96.3	2	F:GO:0004565; P:GO:0005975	F:beta-galactosidase activity; P:carbohydrate metabolic process	EC:3.2.1.23	Beta-galactosidase	IPR001944 (PRINTS); G3DSA:3.20.20.80 (GENE3D); IPR031330 (PFAM); IPR001944 (PANTHER); PTHR23421:SF74 (PANTHER); IPR017853 (SUPERFAMILY)	F:GO:0004553; P:GO:0005975	F:hydrolase activity, hydrolyzing O-glycosyl compounds; P:carbohydrate metabolic process
HY10011_c2_g1_i9	beta-galactosidase-like isoform X2	1325	20	0	95.9	3	F:GO:0004565; P:GO:0005975; F:GO:0030246	F:beta-galactosidase activity; P:carbohydrate metabolic process; F:carbohydrate binding	EC:3.2.1.23	Beta-galactosidase	IPR001944 (PRINTS); IPR008979 (G3DSA:2.60.120.GENE3D); IPR031330 (PFAM); G3DSA:3.20.20.80 (GENE3D); IPR001944 (PANTHER); PTHR23421:SF74 (PANTHER); IPR008979 (SUPERFAMILY); IPR017853 (SUPERFAMILY)	F:GO:0004553; P:GO:0005975	F:hydrolase activity, hydrolyzing O-glycosyl compounds; P:carbohydrate metabolic process
HY10011_c2_g2_i1	syntaxin-32-like	1427	20	3.47877e-165	86.8	6	F:GO:0005484; C:GO:0005622; P:GO:0006886; C:GO:0016021; P:GO:0016192; P:GO:0061025	F:SNAP receptor activity; C:intracellular; P:intracellular protein transport; C:integral component of membrane; P:vesicle-mediated transport; P:membrane fusion			G3DSA:1.20.5.110 (GENE3D); G3DSA:1.20.58.70 (GENE3D); IPR000727 (PFAM); IPR021538 (PFAM); mobidb-lite (MOBIDB_LITE); mobidb-lite (MOBIDB_LITE); PTHR19957 (PANTHER); PTHR19957:SF206 (PANTHER); PTHR19957:SF206 (PANTHER); PTHR19957 (PANTHER); IPR000727 (PROSITE_PROFILES); cd15844 (CDD); IPR010989 (SUPERFAMILY)	C:GO:0016020; P:GO:0016192	C:membrane; P:vesicle-mediated transport
HY10011_c2_g2_i10	syntaxin-32-like	2502	20	2.29196e-119	92.65	6	F:GO:0005484; C:GO:0005622; P:GO:0006886; C:GO:0016021; P:GO:0016192; P:GO:0061025	F:SNAP receptor activity; C:intracellular; P:intracellular protein transport; C:integral component of membrane; P:vesicle-mediated transport; P:membrane fusion			IPR000727 (PFAM); G3DSA:1.20.58.70 (GENE3D); G3DSA:1.20.5.110 (GENE3D); mobidb-lite (MOBIDB_LITE); PTHR19957 (PANTHER); PTHR19957:SF206 (PANTHER); IPR000727 (PROSITE_PROFILES); cd15844 (CDD); IPR010989 (SUPERFAMILY)	C:GO:0016020; P:GO:0016192	C:membrane; P:vesicle-mediated transport
HY10011_c2_g2_i11	syntaxin-32-like	2538	20	7.99695e-116	88.6	6	F:GO:0005484; C:GO:0005622; P:GO:0006886; C:GO:0016021; P:GO:0016192; P:GO:0061025	F:SNAP receptor activity; C:intracellular; P:intracellular protein transport; C:integral component of membrane; P:vesicle-mediated transport; P:membrane fusion			G3DSA:1.20.5.110 (GENE3D); G3DSA:1.20.58.70 (GENE3D); IPR000727 (PFAM); mobidb-lite (MOBIDB_LITE); PTHR19957:SF206 (PANTHER); PTHR19957 (PANTHER); PTHR19957 (PANTHER); PTHR19957:SF206 (PANTHER); IPR000727 (PROSITE_PROFILES); cd15844 (CDD); IPR010989 (SUPERFAMILY)	C:GO:0016020; P:GO:0016192	C:membrane; P:vesicle-mediated transport
HY10011_c2_g2_i12	syntaxin-32-like	2682	20	2.47122e-115	88.6	6	F:GO:0005484; C:GO:0005622; P:GO:0006886; C:GO:0016021; P:GO:0016192; P:GO:0061025	F:SNAP receptor activity; C:intracellular; P:intracellular protein transport; C:integral component of membrane; P:vesicle-mediated transport; P:membrane fusion			G3DSA:1.20.5.110 (GENE3D); G3DSA:1.20.58.70 (GENE3D); IPR000727 (PFAM); mobidb-lite (MOBIDB_LITE); PTHR19957:SF206 (PANTHER); PTHR19957 (PANTHER); PTHR19957 (PANTHER); PTHR19957:SF206 (PANTHER); IPR000727 (PROSITE_PROFILES); cd15844 (CDD); IPR010989 (SUPERFAMILY)	C:GO:0016020; P:GO:0016192	C:membrane; P:vesicle-mediated transport
HY10011_c2_g2_i13	syntaxin-32-like	1392	20	1.23226e-100	88.2	6	F:GO:0005484; C:GO:0005622; P:GO:0006886; C:GO:0016021; P:GO:0016192; P:GO:0061025	F:SNAP receptor activity; C:intracellular; P:intracellular protein transport; C:integral component of membrane; P:vesicle-mediated transport; P:membrane fusion			IPR021538 (PFAM); G3DSA:1.20.58.70 (GENE3D); mobidb-lite (MOBIDB_LITE); mobidb-lite (MOBIDB_LITE); PTHR19957 (PANTHER); PTHR19957:SF206 (PANTHER); IPR010989 (SUPERFAMILY)	C:GO:0016020; P:GO:0016192	C:membrane; P:vesicle-mediated transport
HY10011_c2_g2_i14	syntaxin-32-like	1428	20	1.12239e-168	89.9	6	F:GO:0005484; C:GO:0005622; P:GO:0006886; C:GO:0016021; P:GO:0016192; P:GO:0061025	F:SNAP receptor activity; C:intracellular; P:intracellular protein transport; C:integral component of membrane; P:vesicle-mediated transport; P:membrane fusion			IPR021538 (PFAM); G3DSA:1.20.58.70 (GENE3D); IPR000727 (PFAM); G3DSA:1.20.5.110 (GENE3D); mobidb-lite (MOBIDB_LITE); mobidb-lite (MOBIDB_LITE); PTHR19957:SF206 (PANTHER); PTHR19957 (PANTHER); IPR000727 (PROSITE_PROFILES); cd15844 (CDD); IPR010989 (SUPERFAMILY)	C:GO:0016020; P:GO:0016192	C:membrane; P:vesicle-mediated transport
HY10011_c2_g2_i2	syntaxin-32-like	1366	20	1.37853e-20	97.5	6	F:GO:0005484; C:GO:0005622; P:GO:0006886; C:GO:0016021; P:GO:0016192; P:GO:0061025	F:SNAP receptor activity; C:intracellular; P:intracellular protein transport; C:integral component of membrane; P:vesicle-mediated transport; P:membrane fusion			G3DSA:1.20.58.70 (GENE3D); PTHR19957:SF206 (PANTHER); PTHR19957 (PANTHER); IPR000727 (PROSITE_PROFILES); IPR010989 (SUPERFAMILY)	C:GO:0016020; P:GO:0016192	C:membrane; P:vesicle-mediated transport
HY10011_c2_g2_i3	syntaxin-32-like	1513	20	9.49218e-165	86.8	6	F:GO:0005484; C:GO:0005622; P:GO:0006886; C:GO:0016021; P:GO:0016192; P:GO:0061025	F:SNAP receptor activity; C:intracellular; P:intracellular protein transport; C:integral component of membrane; P:vesicle-mediated transport; P:membrane fusion			G3DSA:1.20.5.110 (GENE3D); G3DSA:1.20.58.70 (GENE3D); IPR000727 (PFAM); IPR021538 (PFAM); mobidb-lite (MOBIDB_LITE); mobidb-lite (MOBIDB_LITE); PTHR19957 (PANTHER); PTHR19957:SF206 (PANTHER); PTHR19957:SF206 (PANTHER); IPR000727 (PROSITE_PROFILES); cd15844 (CDD); IPR010989 (SUPERFAMILY)	C:GO:0016020; P:GO:0016192	C:membrane; P:vesicle-mediated transport
HY10011_c2_g2_i4	syntaxin-32-like	2539	20	3.08403e-119	92.65	6	F:GO:0005484; C:GO:0005622; P:GO:0006886; C:GO:0016021; P:GO:0016192; P:GO:0061025	F:SNAP receptor activity; C:intracellular; P:intracellular protein transport; C:integral component of membrane; P:vesicle-mediated transport; P:membrane fusion			IPR000727 (PFAM); G3DSA:1.20.58.70 (GENE3D); G3DSA:1.20.5.110 (GENE3D); mobidb-lite (MOBIDB_LITE); PTHR19957 (PANTHER); PTHR19957:SF206 (PANTHER); IPR000727 (PROSITE_PROFILES); cd15844 (CDD); IPR010989 (SUPERFAMILY)	C:GO:0016020; P:GO:0016192	C:membrane; P:vesicle-mediated transport
HY10011_c2_g2_i5	syntaxin-32-like	1556	20	4.06498e-56	91.15	6	F:GO:0005484; C:GO:0005622; P:GO:0006886; C:GO:0016021; P:GO:0016192; P:GO:0061025	F:SNAP receptor activity; C:intracellular; P:intracellular protein transport; C:integral component of membrane; P:vesicle-mediated transport; P:membrane fusion			G3DSA:1.20.58.70 (GENE3D); mobidb-lite (MOBIDB_LITE); PTHR19957 (PANTHER); PTHR19957:SF206 (PANTHER); IPR010989 (SUPERFAMILY)	C:GO:0016020; P:GO:0016192	C:membrane; P:vesicle-mediated transport
HY10011_c2_g2_i6	syntaxin-32-like	1083	20	3.94199e-102	88.2	6	F:GO:0005484; C:GO:0005622; P:GO:0006886; C:GO:0016021; P:GO:0016192; P:GO:0061025	F:SNAP receptor activity; C:intracellular; P:intracellular protein transport; C:integral component of membrane; P:vesicle-mediated transport; P:membrane fusion			IPR021538 (PFAM); G3DSA:1.20.58.70 (GENE3D); mobidb-lite (MOBIDB_LITE); mobidb-lite (MOBIDB_LITE); PTHR19957 (PANTHER); PTHR19957:SF206 (PANTHER); IPR010989 (SUPERFAMILY)	C:GO:0016020; P:GO:0016192	C:membrane; P:vesicle-mediated transport
HY10011_c2_g2_i7	syntaxin-32-like	1329	20	1.25589e-20	97.5	6	F:GO:0005484; C:GO:0005622; P:GO:0006886; C:GO:0016021; P:GO:0016192; P:GO:0061025	F:SNAP receptor activity; C:intracellular; P:intracellular protein transport; C:integral component of membrane; P:vesicle-mediated transport; P:membrane fusion			G3DSA:1.20.58.70 (GENE3D); PTHR19957:SF206 (PANTHER); PTHR19957 (PANTHER); IPR000727 (PROSITE_PROFILES); IPR010989 (SUPERFAMILY)	C:GO:0016020; P:GO:0016192	C:membrane; P:vesicle-mediated transport
HY10011_c2_g2_i8	syntaxin-32-like	1391	20	7.25263e-169	89.9	6	F:GO:0005484; C:GO:0005622; P:GO:0006886; C:GO:0016021; P:GO:0016192; P:GO:0061025	F:SNAP receptor activity; C:intracellular; P:intracellular protein transport; C:integral component of membrane; P:vesicle-mediated transport; P:membrane fusion			IPR021538 (PFAM); G3DSA:1.20.58.70 (GENE3D); IPR000727 (PFAM); G3DSA:1.20.5.110 (GENE3D); mobidb-lite (MOBIDB_LITE); mobidb-lite (MOBIDB_LITE); PTHR19957:SF206 (PANTHER); PTHR19957 (PANTHER); IPR000727 (PROSITE_PROFILES); cd15844 (CDD); IPR010989 (SUPERFAMILY)	C:GO:0016020; P:GO:0016192	C:membrane; P:vesicle-mediated transport
HY10011_c2_g2_i9	syntaxin-32-like	2575	20	1.06599e-115	88.6	6	F:GO:0005484; C:GO:0005622; P:GO:0006886; C:GO:0016021; P:GO:0016192; P:GO:0061025	F:SNAP receptor activity; C:intracellular; P:intracellular protein transport; C:integral component of membrane; P:vesicle-mediated transport; P:membrane fusion			G3DSA:1.20.5.110 (GENE3D); G3DSA:1.20.58.70 (GENE3D); IPR000727 (PFAM); mobidb-lite (MOBIDB_LITE); PTHR19957:SF206 (PANTHER); PTHR19957 (PANTHER); PTHR19957 (PANTHER); PTHR19957:SF206 (PANTHER); IPR000727 (PROSITE_PROFILES); cd15844 (CDD); IPR010989 (SUPERFAMILY)	C:GO:0016020; P:GO:0016192	C:membrane; P:vesicle-mediated transport
HY10012_c0_g1_i1	60S ribosomal protein L32-1	809	20	1.49389e-55	96.55	6	C:GO:0000796; F:GO:0003735; C:GO:0005840; P:GO:0006412; P:GO:0007076; P:GO:0051301	C:condensin complex; F:structural constituent of ribosome; C:ribosome; P:translation; P:mitotic chromosome condensation; P:cell division			no IPS match	no IPS match	no IPS match
HY10012_c0_g1_i2	60S ribosomal protein L32-1	875	20	2.50705e-79	97.75	3	F:GO:0003735; C:GO:0005840; P:GO:0006412	F:structural constituent of ribosome; C:ribosome; P:translation			IPR001515 (PFAM); IPR001515 (PANTHER); IPR001515 (PRODOM); IPR001515 (CDD); IPR036351 (SUPERFAMILY)	F:GO:0003735; C:GO:0005622; C:GO:0005840; P:GO:0006412	F:structural constituent of ribosome; C:intracellular; C:ribosome; P:translation
HY10012_c1_g1_i1	disease resistance protein At4g27190-like	415	20	6.88432e-76	84.8						IPR032675 (G3DSA:3.80.10.GENE3D)	no GO terms	no GO terms
HY10012_c1_g1_i2	disease resistance protein At4g27190-like	371	20	8.9109e-48	84.8						IPR032675 (G3DSA:3.80.10.GENE3D)	no GO terms	no GO terms
HY10012_c1_g2_i1	disease resistance protein At4g27190-like	943	20	2.00262e-86	84.6						IPR032675 (G3DSA:3.80.10.GENE3D); PTHR45142 (PANTHER); SSF52047 (SUPERFAMILY)	no GO terms	no GO terms
HY10012_c1_g2_i2	disease resistance protein At4g27190-like	705	20	1.11231e-87	84.6						IPR032675 (G3DSA:3.80.10.GENE3D); PTHR45142 (PANTHER); SSF52047 (SUPERFAMILY)	no GO terms	no GO terms
HY10012_c1_g2_i3	---NA---	273									no IPS match	no IPS match	no IPS match
HY10012_c1_g2_i4	disease resistance protein At4g27190-like	703	20	1.07091e-87	84.6						IPR032675 (G3DSA:3.80.10.GENE3D); PTHR45142 (PANTHER); SSF52047 (SUPERFAMILY)	no GO terms	no GO terms
HY10012_c1_g2_i5	disease resistance protein At4g27190-like	520	20	1.2086e-101	83.7						IPR032675 (G3DSA:3.80.10.GENE3D); PTHR45142 (PANTHER); SSF52047 (SUPERFAMILY)	no GO terms	no GO terms
HY10012_c1_g3_i1	disease resistance protein At4g27190-like	944	20	1.83788e-35	89.2						IPR032675 (G3DSA:3.80.10.GENE3D)	no GO terms	no GO terms
HY10012_c1_g3_i2	disease resistance protein At4g27190-like	281	20	8.90176e-16	88.75	2	P:GO:0006952; F:GO:0043531	P:defense response; F:ADP binding			mobidb-lite (MOBIDB_LITE)	no GO terms	no GO terms
HY10012_c1_g4_i1	---NA---	601									mobidb-lite (MOBIDB_LITE)	no GO terms	no GO terms
HY10012_c1_g4_i2	---NA---	593									no IPS match	no IPS match	no IPS match
HY10012_c1_g5_i1	---NA---	217									no IPS match	no IPS match	no IPS match
HY10012_c2_g1_i1	---NA---	644									no IPS match	no IPS match	no IPS match
HY10012_c2_g1_i2	NADH kinase	1759	20	7.36754e-129	66.35	3	F:GO:0003951; P:GO:0006741; P:GO:0019674	F:NAD+ kinase activity; P:NADP biosynthetic process; P:NAD metabolic process			IPR017437 (G3DSA:2.60.200.GENE3D); PTHR20275:SF24 (PANTHER); IPR002504 (PANTHER); IPR016064 (SUPERFAMILY)	F:GO:0003951; P:GO:0006741; P:GO:0008152; P:GO:0019674	F:NAD+ kinase activity; P:NADP biosynthetic process; P:metabolic process; P:NAD metabolic process
HY10012_c2_g1_i3	NADH kinase isoform X2	1267	20	0	87.4	4	F:GO:0003951; P:GO:0006741; P:GO:0016310; P:GO:0019674	F:NAD+ kinase activity; P:NADP biosynthetic process; P:phosphorylation; P:NAD metabolic process	EC:2.7.1.23	NAD(+) kinase	IPR017437 (G3DSA:2.60.200.GENE3D); IPR002504 (PFAM); IPR017438 (G3DSA:3.40.50.GENE3D); PTHR20275:SF24 (PANTHER); IPR002504 (PANTHER); IPR016064 (SUPERFAMILY)	F:GO:0003951; P:GO:0006741; P:GO:0008152; P:GO:0019674	F:NAD+ kinase activity; P:NADP biosynthetic process; P:metabolic process; P:NAD metabolic process
HY10012_c2_g1_i4	NADH kinase	1474	20	3.36286e-151	66.9	3	F:GO:0003951; P:GO:0006741; P:GO:0019674	F:NAD+ kinase activity; P:NADP biosynthetic process; P:NAD metabolic process			IPR017437 (G3DSA:2.60.200.GENE3D); PTHR20275:SF24 (PANTHER); IPR002504 (PANTHER); IPR016064 (SUPERFAMILY)	F:GO:0003951; P:GO:0006741; P:GO:0008152; P:GO:0019674	F:NAD+ kinase activity; P:NADP biosynthetic process; P:metabolic process; P:NAD metabolic process
HY10012_c2_g1_i5	NADH kinase isoform X1	1623	20	9.57889e-106	85.85	4	F:GO:0003951; P:GO:0006741; P:GO:0016310; P:GO:0019674	F:NAD+ kinase activity; P:NADP biosynthetic process; P:phosphorylation; P:NAD metabolic process	EC:2.7.1.23	NAD(+) kinase	IPR002504 (PFAM); IPR017437 (G3DSA:2.60.200.GENE3D); PTHR20275:SF24 (PANTHER); IPR002504 (PANTHER); IPR016064 (SUPERFAMILY)	F:GO:0003951; P:GO:0006741; P:GO:0008152; P:GO:0019674	F:NAD+ kinase activity; P:NADP biosynthetic process; P:metabolic process; P:NAD metabolic process
HY10012_c2_g1_i6	NADH kinase isoform X1	1552	20	6.09644e-180	88.35	4	F:GO:0003951; P:GO:0006741; P:GO:0016310; P:GO:0019674	F:NAD+ kinase activity; P:NADP biosynthetic process; P:phosphorylation; P:NAD metabolic process	EC:2.7.1.23	NAD(+) kinase	IPR002504 (PFAM); IPR017438 (G3DSA:3.40.50.GENE3D); IPR017437 (G3DSA:2.60.200.GENE3D); IPR002504 (PANTHER); PTHR20275:SF24 (PANTHER); IPR016064 (SUPERFAMILY)	F:GO:0003951; P:GO:0006741; P:GO:0008152; P:GO:0019674	F:NAD+ kinase activity; P:NADP biosynthetic process; P:metabolic process; P:NAD metabolic process
HY10012_c2_g1_i7	NADH kinase isoform X1	1908	20	1.50439e-104	85.85	4	F:GO:0003951; P:GO:0006741; P:GO:0016310; P:GO:0019674	F:NAD+ kinase activity; P:NADP biosynthetic process; P:phosphorylation; P:NAD metabolic process	EC:2.7.1.23	NAD(+) kinase	IPR002504 (PFAM); IPR017437 (G3DSA:2.60.200.GENE3D); PTHR20275:SF24 (PANTHER); IPR002504 (PANTHER); IPR016064 (SUPERFAMILY)	F:GO:0003951; P:GO:0006741; P:GO:0008152; P:GO:0019674	F:NAD+ kinase activity; P:NADP biosynthetic process; P:metabolic process; P:NAD metabolic process
HY10012_c2_g1_i8	NADH kinase isoform X2	398	20	2.67623e-49	90.25	4	F:GO:0003951; P:GO:0006741; P:GO:0016310; P:GO:0019674	F:NAD+ kinase activity; P:NADP biosynthetic process; P:phosphorylation; P:NAD metabolic process	EC:2.7.1.23	NAD(+) kinase	IPR017437 (G3DSA:2.60.200.GENE3D); IPR002504 (PANTHER); PTHR20275:SF24 (PANTHER); IPR016064 (SUPERFAMILY)	F:GO:0003951; P:GO:0006741; P:GO:0008152; P:GO:0019674	F:NAD+ kinase activity; P:NADP biosynthetic process; P:metabolic process; P:NAD metabolic process
HY10012_c2_g2_i1	---NA---	201									no IPS match	no IPS match	no IPS match
HY10012_c2_g3_i1	---NA---	292									no IPS match	no IPS match	no IPS match
HY10012_c3_g1_i1	probable disease resistance protein At4g27220	291	20	3.73077e-57	76.3	1	C:GO:0016020	C:membrane			IPR032675 (G3DSA:3.80.10.GENE3D); PTHR33463 (PANTHER); PTHR33463:SF6 (PANTHER); SSF52047 (SUPERFAMILY)	no GO terms	no GO terms
HY10012_c4_g1_i1	condensin complex subunit 2-like isoform X2	202	20	5.05182e-23	89.1	3	C:GO:0000796; P:GO:0007076; P:GO:0051301	C:condensin complex; P:mitotic chromosome condensation; P:cell division			no IPS match	no IPS match	no IPS match
HY10013_c0_g1_i1	plastidial pyruvate kinase 2	488	20	1.84154e-19	93.9	5	F:GO:0000287; F:GO:0004743; P:GO:0006096; F:GO:0016301; F:GO:0030955	F:magnesium ion binding; F:pyruvate kinase activity; P:glycolytic process; F:kinase activity; F:potassium ion binding	EC:2.7.1.40	Pyruvate kinase	IPR036918 (G3DSA:3.40.1380.GENE3D)	no GO terms	no GO terms
HY10013_c0_g1_i10	plastidial pyruvate kinase 2	2814	20	0	96.4	10	F:GO:0000287; F:GO:0004743; C:GO:0005739; P:GO:0006096; P:GO:0006633; C:GO:0009570; P:GO:0010431; F:GO:0016301; F:GO:0030955; P:GO:0046686	F:magnesium ion binding; F:pyruvate kinase activity; C:mitochondrion; P:glycolytic process; P:fatty acid biosynthetic process; C:chloroplast stroma; P:seed maturation; F:kinase activity; F:potassium ion binding; P:response to cadmium ion	EC:2.7.1.40	Pyruvate kinase	IPR001697 (PRINTS); G3DSA:2.40.33.10 (GENE3D); IPR015795 (PFAM); IPR036918 (G3DSA:3.40.1380.GENE3D); G3DSA:3.20.20.60 (GENE3D); IPR001697 (TIGRFAM); IPR015793 (PFAM); G3DSA:3.20.20.60 (GENE3D); PTHR11817:SF2 (PANTHER); IPR001697 (PANTHER); IPR036918 (SUPERFAMILY); IPR011037 (SUPERFAMILY); IPR015813 (SUPERFAMILY)	F:GO:0000287; F:GO:0003824; F:GO:0004743; P:GO:0006096; F:GO:0030955	F:magnesium ion binding; F:catalytic activity; F:pyruvate kinase activity; P:glycolytic process; F:potassium ion binding
HY10013_c0_g1_i11	plastidial pyruvate kinase 2	1904	20	1.51827e-22	99.4	10	F:GO:0000287; F:GO:0004743; C:GO:0005739; P:GO:0006096; P:GO:0006633; C:GO:0009570; P:GO:0010431; F:GO:0016301; F:GO:0030955; P:GO:0046686	F:magnesium ion binding; F:pyruvate kinase activity; C:mitochondrion; P:glycolytic process; P:fatty acid biosynthetic process; C:chloroplast stroma; P:seed maturation; F:kinase activity; F:potassium ion binding; P:response to cadmium ion	EC:2.7.1.40	Pyruvate kinase	no IPS match	no IPS match	no IPS match
HY10013_c0_g1_i2	probable inactive receptor kinase At5g67200	382	20	4.78892e-27	92.7	4	F:GO:0004672; F:GO:0005524; P:GO:0006468; C:GO:0016021	F:protein kinase activity; F:ATP binding; P:protein phosphorylation; C:integral component of membrane			PTHR27008 (PANTHER); PTHR27008:SF1 (PANTHER)	no GO terms	no GO terms
HY10013_c0_g1_i3	plastidial pyruvate kinase 2	2922	20	0	92.35	10	F:GO:0000287; F:GO:0004743; C:GO:0005739; P:GO:0006096; P:GO:0006633; C:GO:0009570; P:GO:0010431; F:GO:0016301; F:GO:0030955; P:GO:0046686	F:magnesium ion binding; F:pyruvate kinase activity; C:mitochondrion; P:glycolytic process; P:fatty acid biosynthetic process; C:chloroplast stroma; P:seed maturation; F:kinase activity; F:potassium ion binding; P:response to cadmium ion	EC:2.7.1.40	Pyruvate kinase	IPR001697 (PRINTS); IPR036918 (G3DSA:3.40.1380.GENE3D); G3DSA:2.40.33.10 (GENE3D); IPR001697 (TIGRFAM); IPR015793 (PFAM); G3DSA:3.20.20.60 (GENE3D); G3DSA:3.20.20.60 (GENE3D); mobidb-lite (MOBIDB_LITE); IPR001697 (PANTHER); PTHR11817:SF2 (PANTHER); IPR011037 (SUPERFAMILY); IPR015813 (SUPERFAMILY)	F:GO:0000287; F:GO:0003824; F:GO:0004743; P:GO:0006096; F:GO:0030955	F:magnesium ion binding; F:catalytic activity; F:pyruvate kinase activity; P:glycolytic process; F:potassium ion binding
HY10013_c0_g1_i4	plastidial pyruvate kinase 2	2788	20	0	93.6	10	F:GO:0000287; F:GO:0004743; C:GO:0005739; P:GO:0006096; P:GO:0006633; C:GO:0009570; P:GO:0010431; F:GO:0016301; F:GO:0030955; P:GO:0046686	F:magnesium ion binding; F:pyruvate kinase activity; C:mitochondrion; P:glycolytic process; P:fatty acid biosynthetic process; C:chloroplast stroma; P:seed maturation; F:kinase activity; F:potassium ion binding; P:response to cadmium ion	EC:2.7.1.40	Pyruvate kinase	IPR001697 (PRINTS); IPR036918 (G3DSA:3.40.1380.GENE3D); IPR015793 (PFAM); G3DSA:3.20.20.60 (GENE3D); IPR001697 (TIGRFAM); G3DSA:2.40.33.10 (GENE3D); G3DSA:3.20.20.60 (GENE3D); IPR015795 (PFAM); mobidb-lite (MOBIDB_LITE); PTHR11817:SF2 (PANTHER); IPR001697 (PANTHER); IPR015813 (SUPERFAMILY); IPR011037 (SUPERFAMILY); IPR036918 (SUPERFAMILY)	F:GO:0000287; F:GO:0003824; F:GO:0004743; P:GO:0006096; F:GO:0030955	F:magnesium ion binding; F:catalytic activity; F:pyruvate kinase activity; P:glycolytic process; F:potassium ion binding
HY10013_c0_g1_i5	plastidial pyruvate kinase 2	2802	20	0	93.6	10	F:GO:0000287; F:GO:0004743; C:GO:0005739; P:GO:0006096; P:GO:0006633; C:GO:0009570; P:GO:0010431; F:GO:0016301; F:GO:0030955; P:GO:0046686	F:magnesium ion binding; F:pyruvate kinase activity; C:mitochondrion; P:glycolytic process; P:fatty acid biosynthetic process; C:chloroplast stroma; P:seed maturation; F:kinase activity; F:potassium ion binding; P:response to cadmium ion	EC:2.7.1.40	Pyruvate kinase	IPR001697 (PRINTS); IPR036918 (G3DSA:3.40.1380.GENE3D); IPR015793 (PFAM); G3DSA:3.20.20.60 (GENE3D); IPR001697 (TIGRFAM); G3DSA:2.40.33.10 (GENE3D); G3DSA:3.20.20.60 (GENE3D); IPR015795 (PFAM); mobidb-lite (MOBIDB_LITE); PTHR11817:SF2 (PANTHER); IPR001697 (PANTHER); IPR015813 (SUPERFAMILY); IPR011037 (SUPERFAMILY); IPR036918 (SUPERFAMILY)	F:GO:0000287; F:GO:0003824; F:GO:0004743; P:GO:0006096; F:GO:0030955	F:magnesium ion binding; F:catalytic activity; F:pyruvate kinase activity; P:glycolytic process; F:potassium ion binding
HY10013_c0_g1_i6	plastidial pyruvate kinase 2	2895	20	0	96.35	5	F:GO:0000287; F:GO:0004743; P:GO:0006096; F:GO:0016301; F:GO:0030955	F:magnesium ion binding; F:pyruvate kinase activity; P:glycolytic process; F:kinase activity; F:potassium ion binding	EC:2.7.1.40	Pyruvate kinase	IPR001697 (PRINTS); G3DSA:3.20.20.60 (GENE3D); G3DSA:3.20.20.60 (GENE3D); IPR015793 (PFAM); G3DSA:2.40.33.10 (GENE3D); mobidb-lite (MOBIDB_LITE); IPR001697 (PANTHER); PTHR11817:SF2 (PANTHER); IPR011037 (SUPERFAMILY); IPR015813 (SUPERFAMILY)	F:GO:0000287; F:GO:0003824; F:GO:0004743; P:GO:0006096; F:GO:0030955	F:magnesium ion binding; F:catalytic activity; F:pyruvate kinase activity; P:glycolytic process; F:potassium ion binding
HY10013_c0_g1_i7	plastidial pyruvate kinase 2	1793	20	2.0277e-14	96.75	10	F:GO:0000287; F:GO:0004743; C:GO:0005739; P:GO:0006096; P:GO:0006633; C:GO:0009570; P:GO:0010431; F:GO:0016301; F:GO:0030955; P:GO:0046686	F:magnesium ion binding; F:pyruvate kinase activity; C:mitochondrion; P:glycolytic process; P:fatty acid biosynthetic process; C:chloroplast stroma; P:seed maturation; F:kinase activity; F:potassium ion binding; P:response to cadmium ion	EC:2.7.1.40	Pyruvate kinase	IPR036918 (G3DSA:3.40.1380.GENE3D)	no GO terms	no GO terms
HY10013_c0_g1_i8	plastidial pyruvate kinase 2	3158	20	0	91.4	10	F:GO:0000287; F:GO:0004743; C:GO:0005739; P:GO:0006096; P:GO:0006633; C:GO:0009570; P:GO:0010431; F:GO:0016301; F:GO:0030955; P:GO:0046686	F:magnesium ion binding; F:pyruvate kinase activity; C:mitochondrion; P:glycolytic process; P:fatty acid biosynthetic process; C:chloroplast stroma; P:seed maturation; F:kinase activity; F:potassium ion binding; P:response to cadmium ion	EC:2.7.1.40	Pyruvate kinase	IPR001697 (PRINTS); G3DSA:3.20.20.60 (GENE3D); G3DSA:3.20.20.60 (GENE3D); IPR015793 (PFAM); G3DSA:2.40.33.10 (GENE3D); mobidb-lite (MOBIDB_LITE); IPR001697 (PANTHER); PTHR11817:SF2 (PANTHER); IPR011037 (SUPERFAMILY); IPR015813 (SUPERFAMILY)	F:GO:0000287; F:GO:0003824; F:GO:0004743; P:GO:0006096; F:GO:0030955	F:magnesium ion binding; F:catalytic activity; F:pyruvate kinase activity; P:glycolytic process; F:potassium ion binding
HY10013_c0_g1_i9	plastidial pyruvate kinase 2	1116	20	7.84251e-98	96.2	6	F:GO:0000287; F:GO:0004743; P:GO:0006096; C:GO:0009570; F:GO:0016301; F:GO:0030955	F:magnesium ion binding; F:pyruvate kinase activity; P:glycolytic process; C:chloroplast stroma; F:kinase activity; F:potassium ion binding	EC:2.7.1.40	Pyruvate kinase	IPR001697 (PRINTS); IPR015793 (PFAM); G3DSA:3.20.20.60 (GENE3D); IPR001697 (PANTHER); PTHR11817:SF2 (PANTHER); IPR015813 (SUPERFAMILY)	F:GO:0000287; F:GO:0003824; F:GO:0004743; P:GO:0006096; F:GO:0030955	F:magnesium ion binding; F:catalytic activity; F:pyruvate kinase activity; P:glycolytic process; F:potassium ion binding
HY10013_c0_g2_i1	pyruvate kinase isozyme G, chloroplastic	4423	20	0	89.9	6	F:GO:0000287; F:GO:0004743; P:GO:0006096; C:GO:0009570; F:GO:0016301; F:GO:0030955	F:magnesium ion binding; F:pyruvate kinase activity; P:glycolytic process; C:chloroplast stroma; F:kinase activity; F:potassium ion binding	EC:2.7.1.40	Pyruvate kinase	IPR001697 (PRINTS); G3DSA:3.20.20.60 (GENE3D); IPR001697 (TIGRFAM); G3DSA:2.40.33.10 (GENE3D); IPR015793 (PFAM); G3DSA:3.20.20.60 (GENE3D); PTHR11817:SF26 (PANTHER); IPR001697 (PANTHER); IPR015813 (SUPERFAMILY); IPR011037 (SUPERFAMILY)	F:GO:0000287; F:GO:0003824; F:GO:0004743; P:GO:0006096; F:GO:0030955	F:magnesium ion binding; F:catalytic activity; F:pyruvate kinase activity; P:glycolytic process; F:potassium ion binding
HY10013_c0_g2_i10	pyruvate kinase isozyme G, chloroplastic	1147	20	3.04972e-84	93.95	6	F:GO:0000287; F:GO:0004743; P:GO:0006096; C:GO:0009570; F:GO:0016301; F:GO:0030955	F:magnesium ion binding; F:pyruvate kinase activity; P:glycolytic process; C:chloroplast stroma; F:kinase activity; F:potassium ion binding	EC:2.7.1.40	Pyruvate kinase	IPR015795 (PFAM); IPR036918 (G3DSA:3.40.1380.GENE3D); PTHR11817:SF26 (PANTHER); IPR001697 (PANTHER); IPR036918 (SUPERFAMILY)	F:GO:0000287; F:GO:0004743; P:GO:0006096; F:GO:0030955	F:magnesium ion binding; F:pyruvate kinase activity; P:glycolytic process; F:potassium ion binding
HY10013_c0_g2_i11	---NA---	279									no IPS match	no IPS match	no IPS match
HY10013_c0_g2_i12	pyruvate kinase isozyme G, chloroplastic	4184	20	0	82.4	6	F:GO:0000287; F:GO:0004743; P:GO:0006096; C:GO:0009570; F:GO:0016301; F:GO:0030955	F:magnesium ion binding; F:pyruvate kinase activity; P:glycolytic process; C:chloroplast stroma; F:kinase activity; F:potassium ion binding	EC:2.7.1.40	Pyruvate kinase	G3DSA:3.20.20.60 (GENE3D); IPR015793 (PFAM); G3DSA:2.40.33.10 (GENE3D); IPR001697 (PANTHER); PTHR11817:SF26 (PANTHER); IPR011037 (SUPERFAMILY); IPR015813 (SUPERFAMILY)	F:GO:0000287; F:GO:0003824; F:GO:0004743; P:GO:0006096; F:GO:0030955	F:magnesium ion binding; F:catalytic activity; F:pyruvate kinase activity; P:glycolytic process; F:potassium ion binding
HY10013_c0_g2_i2	pyruvate kinase isozyme G, chloroplastic	1177	20	1.82954e-154	93.85	6	F:GO:0000287; F:GO:0004743; P:GO:0006096; C:GO:0009570; F:GO:0016301; F:GO:0030955	F:magnesium ion binding; F:pyruvate kinase activity; P:glycolytic process; C:chloroplast stroma; F:kinase activity; F:potassium ion binding	EC:2.7.1.40	Pyruvate kinase	IPR001697 (PRINTS); IPR036918 (G3DSA:3.40.1380.GENE3D); IPR015793 (PFAM); IPR015795 (PFAM); G3DSA:3.20.20.60 (GENE3D); IPR001697 (PANTHER); PTHR11817:SF26 (PANTHER); IPR036918 (SUPERFAMILY); IPR015813 (SUPERFAMILY)	F:GO:0000287; F:GO:0003824; F:GO:0004743; P:GO:0006096; F:GO:0030955	F:magnesium ion binding; F:catalytic activity; F:pyruvate kinase activity; P:glycolytic process; F:potassium ion binding
HY10013_c0_g2_i3	pyruvate kinase isozyme G, chloroplastic	4166	20	0	89.85	6	F:GO:0000287; F:GO:0004743; P:GO:0006096; C:GO:0009570; F:GO:0016301; F:GO:0030955	F:magnesium ion binding; F:pyruvate kinase activity; P:glycolytic process; C:chloroplast stroma; F:kinase activity; F:potassium ion binding	EC:2.7.1.40	Pyruvate kinase	IPR001697 (PRINTS); G3DSA:3.20.20.60 (GENE3D); IPR001697 (TIGRFAM); G3DSA:2.40.33.10 (GENE3D); IPR015793 (PFAM); G3DSA:3.20.20.60 (GENE3D); PTHR11817:SF26 (PANTHER); IPR001697 (PANTHER); IPR015813 (SUPERFAMILY); IPR011037 (SUPERFAMILY)	F:GO:0000287; F:GO:0003824; F:GO:0004743; P:GO:0006096; F:GO:0030955	F:magnesium ion binding; F:catalytic activity; F:pyruvate kinase activity; P:glycolytic process; F:potassium ion binding
HY10013_c0_g2_i4	pyruvate kinase isozyme G, chloroplastic	4430	20	0	89.85	6	F:GO:0000287; F:GO:0004743; P:GO:0006096; C:GO:0009570; F:GO:0016301; F:GO:0030955	F:magnesium ion binding; F:pyruvate kinase activity; P:glycolytic process; C:chloroplast stroma; F:kinase activity; F:potassium ion binding	EC:2.7.1.40	Pyruvate kinase	IPR001697 (PRINTS); G3DSA:3.20.20.60 (GENE3D); IPR001697 (TIGRFAM); G3DSA:2.40.33.10 (GENE3D); IPR015793 (PFAM); G3DSA:3.20.20.60 (GENE3D); PTHR11817:SF26 (PANTHER); IPR001697 (PANTHER); IPR015813 (SUPERFAMILY); IPR011037 (SUPERFAMILY)	F:GO:0000287; F:GO:0003824; F:GO:0004743; P:GO:0006096; F:GO:0030955	F:magnesium ion binding; F:catalytic activity; F:pyruvate kinase activity; P:glycolytic process; F:potassium ion binding
HY10013_c0_g2_i5	pyruvate kinase isozyme G, chloroplastic	4089	20	0	86.15	6	F:GO:0000287; F:GO:0004743; P:GO:0006096; C:GO:0009570; F:GO:0016301; F:GO:0030955	F:magnesium ion binding; F:pyruvate kinase activity; P:glycolytic process; C:chloroplast stroma; F:kinase activity; F:potassium ion binding	EC:2.7.1.40	Pyruvate kinase	G3DSA:3.20.20.60 (GENE3D); IPR015793 (PFAM); G3DSA:2.40.33.10 (GENE3D); PTHR11817:SF26 (PANTHER); IPR001697 (PANTHER); IPR011037 (SUPERFAMILY); IPR015813 (SUPERFAMILY)	F:GO:0000287; F:GO:0003824; F:GO:0004743; P:GO:0006096; F:GO:0030955	F:magnesium ion binding; F:catalytic activity; F:pyruvate kinase activity; P:glycolytic process; F:potassium ion binding
HY10013_c0_g2_i6	pyruvate kinase isozyme G, chloroplastic	4477	20	0	89.85	6	F:GO:0000287; F:GO:0004743; P:GO:0006096; C:GO:0009570; F:GO:0016301; F:GO:0030955	F:magnesium ion binding; F:pyruvate kinase activity; P:glycolytic process; C:chloroplast stroma; F:kinase activity; F:potassium ion binding	EC:2.7.1.40	Pyruvate kinase	IPR001697 (PRINTS); G3DSA:3.20.20.60 (GENE3D); IPR001697 (TIGRFAM); G3DSA:2.40.33.10 (GENE3D); IPR015793 (PFAM); G3DSA:3.20.20.60 (GENE3D); PTHR11817:SF26 (PANTHER); IPR001697 (PANTHER); IPR015813 (SUPERFAMILY); IPR011037 (SUPERFAMILY)	F:GO:0000287; F:GO:0003824; F:GO:0004743; P:GO:0006096; F:GO:0030955	F:magnesium ion binding; F:catalytic activity; F:pyruvate kinase activity; P:glycolytic process; F:potassium ion binding
HY10013_c0_g2_i7	pyruvate kinase isozyme G, chloroplastic	4470	20	0	89.9	6	F:GO:0000287; F:GO:0004743; P:GO:0006096; C:GO:0009570; F:GO:0016301; F:GO:0030955	F:magnesium ion binding; F:pyruvate kinase activity; P:glycolytic process; C:chloroplast stroma; F:kinase activity; F:potassium ion binding	EC:2.7.1.40	Pyruvate kinase	IPR001697 (PRINTS); G3DSA:3.20.20.60 (GENE3D); IPR001697 (TIGRFAM); G3DSA:2.40.33.10 (GENE3D); IPR015793 (PFAM); G3DSA:3.20.20.60 (GENE3D); PTHR11817:SF26 (PANTHER); IPR001697 (PANTHER); IPR015813 (SUPERFAMILY); IPR011037 (SUPERFAMILY)	F:GO:0000287; F:GO:0003824; F:GO:0004743; P:GO:0006096; F:GO:0030955	F:magnesium ion binding; F:catalytic activity; F:pyruvate kinase activity; P:glycolytic process; F:potassium ion binding
HY10013_c0_g2_i8	amino acid transporter ANTL1	396	20	2.30698e-08	94.2	1	C:GO:0016021	C:integral component of membrane			mobidb-lite (MOBIDB_LITE)	no GO terms	no GO terms
HY10013_c0_g2_i9	pyruvate kinase isozyme G, chloroplastic	1002	20	2.6519e-174	94.75	6	F:GO:0000287; F:GO:0004743; P:GO:0006096; C:GO:0009570; F:GO:0016301; F:GO:0030955	F:magnesium ion binding; F:pyruvate kinase activity; P:glycolytic process; C:chloroplast stroma; F:kinase activity; F:potassium ion binding	EC:2.7.1.40	Pyruvate kinase	IPR001697 (PRINTS); G3DSA:3.20.20.60 (GENE3D); IPR036918 (G3DSA:3.40.1380.GENE3D); IPR015793 (PFAM); IPR015795 (PFAM); PTHR11817:SF26 (PANTHER); IPR001697 (PANTHER); IPR015813 (SUPERFAMILY); IPR036918 (SUPERFAMILY)	F:GO:0000287; F:GO:0003824; F:GO:0004743; P:GO:0006096; F:GO:0030955	F:magnesium ion binding; F:catalytic activity; F:pyruvate kinase activity; P:glycolytic process; F:potassium ion binding
HY10013_c0_g3_i1	hypothetical protein CISIN_1g0073492mg, partial	932	1	1.23603e-20	95	5	F:GO:0000287; F:GO:0004743; P:GO:0006096; F:GO:0016301; F:GO:0030955	F:magnesium ion binding; F:pyruvate kinase activity; P:glycolytic process; F:kinase activity; F:potassium ion binding	EC:2.7.1.40	Pyruvate kinase	no IPS match	no IPS match	no IPS match
HY10013_c0_g3_i2	---NA---	878									no IPS match	no IPS match	no IPS match
HY10014_c0_g1_i1	mitochondrial import inner membrane translocase subunit TIM22-2-like	449	20	3.98747e-20	87.55	3	C:GO:0016021; P:GO:0033365; P:GO:0071806	C:integral component of membrane; P:protein localization to organelle; P:protein transmembrane transport			mobidb-lite (MOBIDB_LITE); PTHR14110:SF1 (PANTHER); PTHR14110 (PANTHER)	no GO terms	no GO terms
HY10014_c0_g1_i10	mitochondrial import inner membrane translocase subunit TIM22-2-like	391	20	5.04024e-42	91.95	1	C:GO:0016021	C:integral component of membrane			IPR003397 (PFAM); mobidb-lite (MOBIDB_LITE); PTHR14110 (PANTHER); PTHR14110:SF1 (PANTHER)	no GO terms	no GO terms
HY10014_c0_g1_i11	mitochondrial import inner membrane translocase subunit TIM22-2	1410	9	8.36859e-09	90	1	C:GO:0016021	C:integral component of membrane			no IPS match	no IPS match	no IPS match
HY10014_c0_g1_i2	mitochondrial import inner membrane translocase subunit TIM22-2-like	391	20	8.49392e-42	91.95	1	C:GO:0016021	C:integral component of membrane			IPR003397 (PFAM); mobidb-lite (MOBIDB_LITE); PTHR14110 (PANTHER); PTHR14110:SF1 (PANTHER)	no GO terms	no GO terms
HY10014_c0_g1_i3	mitochondrial import inner membrane translocase subunit TIM22-2-like	412	20	1.10965e-41	91.95	1	C:GO:0016021	C:integral component of membrane			IPR003397 (PFAM); mobidb-lite (MOBIDB_LITE); PTHR14110 (PANTHER); PTHR14110:SF1 (PANTHER)	no GO terms	no GO terms
HY10014_c0_g1_i4	mitochondrial import inner membrane translocase subunit TIM22-2-like	2052	20	3.32591e-37	93.15	3	C:GO:0016021; P:GO:0033365; P:GO:0071806	C:integral component of membrane; P:protein localization to organelle; P:protein transmembrane transport			IPR003397 (PFAM); PTHR14110 (PANTHER); PTHR14110:SF1 (PANTHER)	no GO terms	no GO terms
HY10014_c0_g1_i5	mitochondrial import inner membrane translocase subunit TIM22-2-like	2616	20	4.99382e-41	79.25	4	C:GO:0005739; C:GO:0009941; C:GO:0016021; P:GO:0033365	C:mitochondrion; C:chloroplast envelope; C:integral component of membrane; P:protein localization to organelle			PTHR14110:SF1 (PANTHER); PTHR14110 (PANTHER)	no GO terms	no GO terms
HY10014_c0_g1_i6	mitochondrial import inner membrane translocase subunit TIM22-2-like	540	17	1.05231e-09	83.53	1	C:GO:0016021	C:integral component of membrane			no IPS match	no IPS match	no IPS match
HY10014_c0_g1_i7	mitochondrial import inner membrane translocase subunit TIM22-2-like	449	20	7.4738e-20	87.55	3	C:GO:0016021; P:GO:0033365; P:GO:0071806	C:integral component of membrane; P:protein localization to organelle; P:protein transmembrane transport			mobidb-lite (MOBIDB_LITE); PTHR14110:SF1 (PANTHER); PTHR14110 (PANTHER)	no GO terms	no GO terms
HY10014_c0_g1_i8	mitochondrial import inner membrane translocase subunit TIM22-2-like	3002	20	7.49814e-43	78.3	4	C:GO:0005739; C:GO:0009941; C:GO:0016021; P:GO:0033365	C:mitochondrion; C:chloroplast envelope; C:integral component of membrane; P:protein localization to organelle			PTHR14110 (PANTHER); PTHR14110:SF1 (PANTHER)	no GO terms	no GO terms
HY10014_c0_g1_i9	mitochondrial import inner membrane translocase subunit TIM22-2-like	547	20	5.72546e-41	91.95	1	C:GO:0016021	C:integral component of membrane			IPR003397 (PFAM); mobidb-lite (MOBIDB_LITE); PTHR14110 (PANTHER); PTHR14110:SF1 (PANTHER)	no GO terms	no GO terms
HY10014_c0_g2_i1	DVL family protein	311	20	3.4441e-15	74.5	1	C:GO:0016021	C:integral component of membrane			IPR012552 (PFAM); PTHR33102 (PANTHER); PTHR33102:SF3 (PANTHER)	no GO terms	no GO terms
HY10014_c0_g2_i2	DVL family protein	311	20	3.4441e-15	74.5	1	C:GO:0016021	C:integral component of membrane			IPR012552 (PFAM); PTHR33102 (PANTHER); PTHR33102:SF3 (PANTHER)	no GO terms	no GO terms
HY10014_c0_g3_i1	transcription factor VIP1	1681	20	1.2824e-08	98.65	3	F:GO:0003677; F:GO:0003700; P:GO:0006355	F:DNA binding; F:DNA binding transcription factor activity; P:regulation of transcription, DNA-templated			no IPS match	no IPS match	no IPS match
HY10014_c0_g3_i2	---NA---	228									no IPS match	no IPS match	no IPS match
HY10014_c0_g4_i1	hypothetical protein CICLE_v10023091mg	834	2	1.7605e-49	97.5						no IPS match	no IPS match	no IPS match
HY10015_c0_g1_i1	ninja-family protein Os05g0558800	2976	20	2.96911e-131	66.4	1	P:GO:0007165	P:signal transduction			IPR032308 (PFAM); mobidb-lite (MOBIDB_LITE); mobidb-lite (MOBIDB_LITE); IPR031307 (PANTHER); PTHR31413:SF11 (PANTHER)	P:GO:0007165	P:signal transduction
HY10015_c0_g1_i2	ninja-family protein Os05g0558800	2978	20	1.86746e-133	68.65	1	P:GO:0007165	P:signal transduction			IPR032308 (PFAM); mobidb-lite (MOBIDB_LITE); mobidb-lite (MOBIDB_LITE); PTHR31413:SF11 (PANTHER); IPR031307 (PANTHER)	P:GO:0007165	P:signal transduction
HY10015_c0_g1_i3	ninja-family protein Os05g0558800	1777	20	3.36211e-178	63.9	1	P:GO:0007165	P:signal transduction			IPR032308 (PFAM); mobidb-lite (MOBIDB_LITE); mobidb-lite (MOBIDB_LITE); PTHR31413:SF11 (PANTHER); IPR031307 (PANTHER)	P:GO:0007165	P:signal transduction
HY10015_c0_g1_i4	ninja-family protein Os05g0558800	1774	20	4.34237e-165	64.9	1	P:GO:0007165	P:signal transduction			IPR032308 (PFAM); mobidb-lite (MOBIDB_LITE); mobidb-lite (MOBIDB_LITE); PTHR31413:SF11 (PANTHER); IPR031307 (PANTHER)	P:GO:0007165	P:signal transduction
HY10015_c0_g1_i5	ninja-family protein Os05g0558800	2669	20	1.46088e-134	68.65	1	P:GO:0007165	P:signal transduction			IPR032308 (PFAM); mobidb-lite (MOBIDB_LITE); mobidb-lite (MOBIDB_LITE); PTHR31413:SF11 (PANTHER); IPR031307 (PANTHER)	P:GO:0007165	P:signal transduction
HY10015_c0_g1_i6	ninja-family protein Os05g0558800	3126	20	5.92345e-133	68.65	1	P:GO:0007165	P:signal transduction			IPR032308 (PFAM); mobidb-lite (MOBIDB_LITE); mobidb-lite (MOBIDB_LITE); PTHR31413:SF11 (PANTHER); IPR031307 (PANTHER)	P:GO:0007165	P:signal transduction
HY10015_c0_g1_i7	ninja-family protein Os05g0558800	2981	20	1.91208e-133	68.65	1	P:GO:0007165	P:signal transduction			IPR032308 (PFAM); mobidb-lite (MOBIDB_LITE); mobidb-lite (MOBIDB_LITE); PTHR31413:SF11 (PANTHER); IPR031307 (PANTHER)	P:GO:0007165	P:signal transduction
HY10015_c0_g2_i1	ninja-family protein 1-like	1136	20	1.59079e-124	59.5	1	P:GO:0007165	P:signal transduction			mobidb-lite (MOBIDB_LITE); mobidb-lite (MOBIDB_LITE)	no GO terms	no GO terms
HY10015_c0_g2_i2	ninja-family protein 1-like	285	20	5.18011e-54	63.35	1	P:GO:0007165	P:signal transduction			no IPS match	no IPS match	no IPS match
HY10016_c0_g1_i1	---NA---	463									no IPS match	no IPS match	no IPS match
HY10016_c1_g1_i1	2,3-bisphosphoglycerate-dependent phosphoglycerate mutase	2046	20	4.68805e-126	96.45	3	F:GO:0004619; P:GO:0006096; C:GO:0016021	F:phosphoglycerate mutase activity; P:glycolytic process; C:integral component of membrane	EC:5.4.2.1	Intramolecular transferases	IPR029033 (G3DSA:3.40.50.GENE3D); IPR013078 (PFAM); IPR005952 (PANTHER); PTHR11931:SF16 (PANTHER); IPR013078 (CDD); IPR029033 (SUPERFAMILY)	F:GO:0004619; P:GO:0006096; F:GO:0016868	F:phosphoglycerate mutase activity; P:glycolytic process; F:intramolecular transferase activity, phosphotransferases
HY10016_c1_g1_i10	2,3-bisphosphoglycerate-dependent phosphoglycerate mutase	2429	20	4.15378e-177	96.95	2	F:GO:0004619; P:GO:0006096	F:phosphoglycerate mutase activity; P:glycolytic process	EC:5.4.2.1	Intramolecular transferases	IPR029033 (G3DSA:3.40.50.GENE3D); IPR013078 (PFAM); PIRSF000709 (PIRSF); PTHR11931:SF16 (PANTHER); IPR005952 (PANTHER); IPR005952 (HAMAP); IPR013078 (CDD); IPR029033 (SUPERFAMILY)	F:GO:0004619; P:GO:0006096; F:GO:0016868	F:phosphoglycerate mutase activity; P:glycolytic process; F:intramolecular transferase activity, phosphotransferases
HY10016_c1_g1_i11	2,3-bisphosphoglycerate-dependent phosphoglycerate mutase	1170	20	1.1593e-114	96.65	3	F:GO:0004619; P:GO:0006096; C:GO:0016021	F:phosphoglycerate mutase activity; P:glycolytic process; C:integral component of membrane	EC:5.4.2.1	Intramolecular transferases	IPR029033 (G3DSA:3.40.50.GENE3D); IPR013078 (PFAM); IPR005952 (PANTHER); PTHR11931:SF16 (PANTHER); IPR013078 (CDD); IPR029033 (SUPERFAMILY)	F:GO:0004619; P:GO:0006096; F:GO:0016868	F:phosphoglycerate mutase activity; P:glycolytic process; F:intramolecular transferase activity, phosphotransferases
HY10016_c1_g1_i12	2,3-bisphosphoglycerate-dependent phosphoglycerate mutase	2141	20	0	90.3	3	F:GO:0004619; P:GO:0006096; C:GO:0016021	F:phosphoglycerate mutase activity; P:glycolytic process; C:integral component of membrane	EC:5.4.2.1	Intramolecular transferases	IPR029033 (G3DSA:3.40.50.GENE3D); IPR013078 (PFAM); IPR005952 (PANTHER); PTHR11931:SF16 (PANTHER); IPR005952 (HAMAP); IPR013078 (CDD); IPR029033 (SUPERFAMILY)	F:GO:0004619; P:GO:0006096; F:GO:0016868	F:phosphoglycerate mutase activity; P:glycolytic process; F:intramolecular transferase activity, phosphotransferases
HY10016_c1_g1_i13	2,3-bisphosphoglycerate-dependent phosphoglycerate mutase	1110	20	4.9161e-22	56	3	F:GO:0016868; P:GO:0044238; P:GO:0071704	F:intramolecular transferase activity, phosphotransferases; P:primary metabolic process; P:organic substance metabolic process			no IPS match	no IPS match	no IPS match
HY10016_c1_g1_i14	2,3-bisphosphoglycerate-dependent phosphoglycerate mutase	212	20	5.03998e-14	100	6	C:GO:0005829; P:GO:0006094; P:GO:0006096; C:GO:0016021; P:GO:0043456; F:GO:0046538	C:cytosol; P:gluconeogenesis; P:glycolytic process; C:integral component of membrane; P:regulation of pentose-phosphate shunt; F:2,3-bisphosphoglycerate-dependent phosphoglycerate mutase activity	EC:5.4.2.1	Intramolecular transferases	no IPS match	no IPS match	no IPS match
HY10016_c1_g1_i15	2,3-bisphosphoglycerate-dependent phosphoglycerate mutase	1417	20	9.80822e-99	97.7	6	C:GO:0005829; P:GO:0006094; P:GO:0006096; C:GO:0016021; P:GO:0043456; F:GO:0046538	C:cytosol; P:gluconeogenesis; P:glycolytic process; C:integral component of membrane; P:regulation of pentose-phosphate shunt; F:2,3-bisphosphoglycerate-dependent phosphoglycerate mutase activity	EC:5.4.2.1	Intramolecular transferases	IPR029033 (G3DSA:3.40.50.GENE3D); IPR013078 (PFAM); IPR005952 (PANTHER); PTHR11931:SF16 (PANTHER); IPR029033 (SUPERFAMILY)	F:GO:0004619; P:GO:0006096; F:GO:0016868	F:phosphoglycerate mutase activity; P:glycolytic process; F:intramolecular transferase activity, phosphotransferases
HY10016_c1_g1_i16	2,3-bisphosphoglycerate-dependent phosphoglycerate mutase	2108	20	1.08922e-44	96.9	6	C:GO:0005829; P:GO:0006094; P:GO:0006096; C:GO:0016021; P:GO:0043456; F:GO:0046538	C:cytosol; P:gluconeogenesis; P:glycolytic process; C:integral component of membrane; P:regulation of pentose-phosphate shunt; F:2,3-bisphosphoglycerate-dependent phosphoglycerate mutase activity	EC:5.4.2.1	Intramolecular transferases	IPR013078 (PFAM); IPR029033 (G3DSA:3.40.50.GENE3D); IPR005952 (PANTHER); PTHR11931:SF16 (PANTHER); IPR029033 (SUPERFAMILY)	F:GO:0004619; P:GO:0006096; F:GO:0016868	F:phosphoglycerate mutase activity; P:glycolytic process; F:intramolecular transferase activity, phosphotransferases
HY10016_c1_g1_i2	2,3-bisphosphoglycerate-dependent phosphoglycerate mutase	1153	20	8.82203e-171	97	3	F:GO:0004619; P:GO:0006096; C:GO:0016021	F:phosphoglycerate mutase activity; P:glycolytic process; C:integral component of membrane	EC:5.4.2.1	Intramolecular transferases	IPR013078 (PFAM); IPR029033 (G3DSA:3.40.50.GENE3D); IPR005952 (PANTHER); PTHR11931:SF16 (PANTHER); IPR013078 (CDD); IPR029033 (SUPERFAMILY)	F:GO:0004619; P:GO:0006096; F:GO:0016868	F:phosphoglycerate mutase activity; P:glycolytic process; F:intramolecular transferase activity, phosphotransferases
HY10016_c1_g1_i3	2,3-bisphosphoglycerate-dependent phosphoglycerate mutase	2008	20	1.02942e-44	96.9	6	C:GO:0005829; P:GO:0006094; P:GO:0006096; C:GO:0016021; P:GO:0043456; F:GO:0046538	C:cytosol; P:gluconeogenesis; P:glycolytic process; C:integral component of membrane; P:regulation of pentose-phosphate shunt; F:2,3-bisphosphoglycerate-dependent phosphoglycerate mutase activity	EC:5.4.2.1	Intramolecular transferases	no IPS match	no IPS match	no IPS match
HY10016_c1_g1_i4	2,3-bisphosphoglycerate-dependent phosphoglycerate mutase	2459	20	2.08732e-124	96.45	3	F:GO:0004619; P:GO:0006096; C:GO:0016021	F:phosphoglycerate mutase activity; P:glycolytic process; C:integral component of membrane	EC:5.4.2.1	Intramolecular transferases	IPR029033 (G3DSA:3.40.50.GENE3D); IPR013078 (PFAM); IPR005952 (PANTHER); PTHR11931:SF16 (PANTHER); IPR013078 (CDD); IPR029033 (SUPERFAMILY)	F:GO:0004619; P:GO:0006096; F:GO:0016868	F:phosphoglycerate mutase activity; P:glycolytic process; F:intramolecular transferase activity, phosphotransferases
HY10016_c1_g1_i5	2,3-bisphosphoglycerate-dependent phosphoglycerate mutase	2034	20	3.21247e-98	96.4	3	F:GO:0004619; P:GO:0006096; C:GO:0016021	F:phosphoglycerate mutase activity; P:glycolytic process; C:integral component of membrane	EC:5.4.2.1	Intramolecular transferases	IPR029033 (G3DSA:3.40.50.GENE3D); IPR013078 (PFAM); IPR005952 (PANTHER); PTHR11931:SF16 (PANTHER); IPR013078 (CDD); IPR029033 (SUPERFAMILY)	F:GO:0004619; P:GO:0006096; F:GO:0016868	F:phosphoglycerate mutase activity; P:glycolytic process; F:intramolecular transferase activity, phosphotransferases
HY10016_c1_g1_i6	2,3-bisphosphoglycerate-dependent phosphoglycerate mutase	1728	20	0	90.4	3	F:GO:0004619; P:GO:0006096; C:GO:0016021	F:phosphoglycerate mutase activity; P:glycolytic process; C:integral component of membrane	EC:5.4.2.1	Intramolecular transferases	IPR013078 (PFAM); IPR029033 (G3DSA:3.40.50.GENE3D); PTHR11931:SF16 (PANTHER); IPR005952 (PANTHER); IPR005952 (HAMAP); IPR013078 (CDD); IPR029033 (SUPERFAMILY)	F:GO:0004619; P:GO:0006096; F:GO:0016868	F:phosphoglycerate mutase activity; P:glycolytic process; F:intramolecular transferase activity, phosphotransferases
HY10016_c1_g1_i7	2,3-bisphosphoglycerate-dependent phosphoglycerate mutase	1875	20	8.66915e-111	96.4	3	F:GO:0004619; P:GO:0006096; C:GO:0016021	F:phosphoglycerate mutase activity; P:glycolytic process; C:integral component of membrane	EC:5.4.2.1	Intramolecular transferases	IPR013078 (PFAM); IPR029033 (G3DSA:3.40.50.GENE3D); IPR005952 (PANTHER); PTHR11931:SF16 (PANTHER); IPR013078 (CDD); IPR029033 (SUPERFAMILY)	F:GO:0004619; P:GO:0006096; F:GO:0016868	F:phosphoglycerate mutase activity; P:glycolytic process; F:intramolecular transferase activity, phosphotransferases
HY10016_c1_g1_i8	2,3-bisphosphoglycerate-dependent phosphoglycerate mutase	2214	20	0	90.25	6	C:GO:0005829; P:GO:0006094; P:GO:0006096; C:GO:0016021; P:GO:0043456; F:GO:0046538	C:cytosol; P:gluconeogenesis; P:glycolytic process; C:integral component of membrane; P:regulation of pentose-phosphate shunt; F:2,3-bisphosphoglycerate-dependent phosphoglycerate mutase activity	EC:5.4.2.1	Intramolecular transferases	IPR013078 (PFAM); IPR029033 (G3DSA:3.40.50.GENE3D); IPR005952 (PANTHER); PTHR11931:SF16 (PANTHER); IPR005952 (HAMAP); IPR013078 (CDD); IPR029033 (SUPERFAMILY)	F:GO:0004619; P:GO:0006096; F:GO:0016868	F:phosphoglycerate mutase activity; P:glycolytic process; F:intramolecular transferase activity, phosphotransferases
HY10016_c1_g1_i9	2,3-bisphosphoglycerate-dependent phosphoglycerate mutase	1210	20	7.71992e-22	56	3	F:GO:0016868; P:GO:0044238; P:GO:0071704	F:intramolecular transferase activity, phosphotransferases; P:primary metabolic process; P:organic substance metabolic process			no IPS match	no IPS match	no IPS match
HY10016_c1_g2_i1	PRA1 family protein B3-like	1344	20	2.12895e-72	90.75	1	C:GO:0016021	C:integral component of membrane			IPR004895 (PFAM); mobidb-lite (MOBIDB_LITE); PTHR19317 (PANTHER); PTHR19317:SF34 (PANTHER)	no GO terms	no GO terms
HY10016_c1_g2_i2	PRA1 family protein B3-like	623	20	3.63967e-58	87.9	1	C:GO:0016021	C:integral component of membrane			IPR004895 (PFAM); mobidb-lite (MOBIDB_LITE); PTHR19317:SF34 (PANTHER); PTHR19317 (PANTHER)	no GO terms	no GO terms
HY10016_c1_g2_i3	PRA1 family protein B3-like	1968	20	3.25004e-70	90.75	1	C:GO:0016021	C:integral component of membrane			IPR004895 (PFAM); mobidb-lite (MOBIDB_LITE); PTHR19317 (PANTHER); PTHR19317:SF34 (PANTHER)	no GO terms	no GO terms
HY10016_c1_g2_i4	PRA1 family protein B3-like	1600	20	2.03322e-71	90.75	1	C:GO:0016021	C:integral component of membrane			IPR004895 (PFAM); mobidb-lite (MOBIDB_LITE); PTHR19317 (PANTHER); PTHR19317:SF34 (PANTHER)	no GO terms	no GO terms
HY10017_c0_g1_i1	DNA repair protein recA homolog 2, mitochondrial isoform X2	319	20	2.5591e-28	84.55	5	F:GO:0003697; F:GO:0005524; P:GO:0006281; P:GO:0006310; F:GO:0008094	F:single-stranded DNA binding; F:ATP binding; P:DNA repair; P:DNA recombination; F:DNA-dependent ATPase activity	EC:3.6.1.3; EC:3.6.1.15	Adenosinetriphosphatase; Nucleoside-triphosphate phosphatase	IPR013765 (PRINTS); IPR013765 (PFAM); PTHR22942 (PANTHER); PTHR22942:SF41 (PANTHER)	F:GO:0003697; F:GO:0005524; P:GO:0006281	F:single-stranded DNA binding; F:ATP binding; P:DNA repair
HY10017_c0_g1_i10	DNA repair protein recA homolog 2, mitochondrial isoform X1	1797	20	0	86.25	11	F:GO:0000150; F:GO:0000400; P:GO:0000730; F:GO:0003690; F:GO:0003697; F:GO:0004520; F:GO:0005524; P:GO:0006312; F:GO:0008094; P:GO:0010212; P:GO:0042148	F:recombinase activity; F:four-way junction DNA binding; P:DNA recombinase assembly; F:double-stranded DNA binding; F:single-stranded DNA binding; F:endodeoxyribonuclease activity; F:ATP binding; P:mitotic recombination; F:DNA-dependent ATPase activity; P:response to ionizing radiation; P:strand invasion	EC:3.6.1.3; EC:3.6.1.15	Adenosinetriphosphatase; Nucleoside-triphosphate phosphatase	IPR013765 (PRINTS); IPR013765 (PFAM); G3DSA:3.40.50.300 (GENE3D); PTHR22942:SF41 (PANTHER); PTHR22942 (PANTHER); IPR020587 (PROSITE_PROFILES); IPR020588 (PROSITE_PROFILES); IPR027417 (SUPERFAMILY)	F:GO:0003677; F:GO:0003697; F:GO:0005524; P:GO:0006259; P:GO:0006281; F:GO:0008094	F:DNA binding; F:single-stranded DNA binding; F:ATP binding; P:DNA metabolic process; P:DNA repair; F:DNA-dependent ATPase activity
HY10017_c0_g1_i11	DNA repair protein recA homolog 2, mitochondrial isoform X1	1084	20	0	77.5	11	F:GO:0000150; F:GO:0000400; P:GO:0000730; F:GO:0003690; F:GO:0003697; F:GO:0004520; F:GO:0005524; P:GO:0006312; F:GO:0008094; P:GO:0010212; P:GO:0042148	F:recombinase activity; F:four-way junction DNA binding; P:DNA recombinase assembly; F:double-stranded DNA binding; F:single-stranded DNA binding; F:endodeoxyribonuclease activity; F:ATP binding; P:mitotic recombination; F:DNA-dependent ATPase activity; P:response to ionizing radiation; P:strand invasion	EC:3.6.1.3; EC:3.6.1.15	Adenosinetriphosphatase; Nucleoside-triphosphate phosphatase	IPR013765 (PRINTS); IPR013765 (PFAM); G3DSA:3.40.50.300 (GENE3D); PTHR22942:SF41 (PANTHER); PTHR22942 (PANTHER); IPR020588 (PROSITE_PROFILES); IPR027417 (SUPERFAMILY)	F:GO:0003677; F:GO:0003697; F:GO:0005524; P:GO:0006281; F:GO:0008094	F:DNA binding; F:single-stranded DNA binding; F:ATP binding; P:DNA repair; F:DNA-dependent ATPase activity
HY10017_c0_g1_i12	DNA repair protein recA homolog 2, mitochondrial isoform X1	1063	20	0	78.65	11	F:GO:0000150; F:GO:0000400; P:GO:0000730; F:GO:0003690; F:GO:0003697; F:GO:0004520; F:GO:0005524; P:GO:0006312; F:GO:0008094; P:GO:0010212; P:GO:0042148	F:recombinase activity; F:four-way junction DNA binding; P:DNA recombinase assembly; F:double-stranded DNA binding; F:single-stranded DNA binding; F:endodeoxyribonuclease activity; F:ATP binding; P:mitotic recombination; F:DNA-dependent ATPase activity; P:response to ionizing radiation; P:strand invasion	EC:3.6.1.3; EC:3.6.1.15	Adenosinetriphosphatase; Nucleoside-triphosphate phosphatase	IPR013765 (PRINTS); IPR013765 (PFAM); G3DSA:3.40.50.300 (GENE3D); PTHR22942:SF41 (PANTHER); PTHR22942 (PANTHER); IPR020588 (PROSITE_PROFILES); IPR027417 (SUPERFAMILY)	F:GO:0003677; F:GO:0003697; F:GO:0005524; P:GO:0006281; F:GO:0008094	F:DNA binding; F:single-stranded DNA binding; F:ATP binding; P:DNA repair; F:DNA-dependent ATPase activity
HY10017_c0_g1_i2	DNA repair protein recA homolog 2, mitochondrial isoform X1	1844	20	0	84.7	11	F:GO:0000150; F:GO:0000400; P:GO:0000730; F:GO:0003690; F:GO:0003697; F:GO:0004520; F:GO:0005524; P:GO:0006312; F:GO:0008094; P:GO:0010212; P:GO:0042148	F:recombinase activity; F:four-way junction DNA binding; P:DNA recombinase assembly; F:double-stranded DNA binding; F:single-stranded DNA binding; F:endodeoxyribonuclease activity; F:ATP binding; P:mitotic recombination; F:DNA-dependent ATPase activity; P:response to ionizing radiation; P:strand invasion	EC:3.6.1.3; EC:3.6.1.15	Adenosinetriphosphatase; Nucleoside-triphosphate phosphatase	IPR013765 (PRINTS); IPR023400 (G3DSA:3.30.250.GENE3D); IPR013765 (TIGRFAM); IPR013765 (PFAM); G3DSA:3.40.50.300 (GENE3D); PTHR22942 (PANTHER); PTHR22942:SF41 (PANTHER); IPR020587 (PROSITE_PROFILES); IPR020588 (PROSITE_PROFILES); IPR027417 (SUPERFAMILY)	F:GO:0003677; F:GO:0003697; F:GO:0005524; P:GO:0006259; P:GO:0006281; F:GO:0008094	F:DNA binding; F:single-stranded DNA binding; F:ATP binding; P:DNA metabolic process; P:DNA repair; F:DNA-dependent ATPase activity
HY10017_c0_g1_i3	DNA repair protein recA homolog 2, mitochondrial isoform X1	554	20	2.52723e-59	81.65	6	F:GO:0003697; F:GO:0005524; P:GO:0006281; P:GO:0006310; F:GO:0008094; C:GO:0016020	F:single-stranded DNA binding; F:ATP binding; P:DNA repair; P:DNA recombination; F:DNA-dependent ATPase activity; C:membrane	EC:3.6.1.3; EC:3.6.1.15	Adenosinetriphosphatase; Nucleoside-triphosphate phosphatase	IPR013765 (PRINTS); IPR023400 (G3DSA:3.30.250.GENE3D); PTHR22942 (PANTHER); PTHR22942:SF41 (PANTHER)	F:GO:0003697; F:GO:0005524; P:GO:0006281	F:single-stranded DNA binding; F:ATP binding; P:DNA repair
HY10017_c0_g1_i4	DNA repair protein recA homolog 2, mitochondrial isoform X1	1850	20	0	83.9	11	F:GO:0000150; F:GO:0000400; P:GO:0000730; F:GO:0003690; F:GO:0003697; F:GO:0004520; F:GO:0005524; P:GO:0006312; F:GO:0008094; P:GO:0010212; P:GO:0042148	F:recombinase activity; F:four-way junction DNA binding; P:DNA recombinase assembly; F:double-stranded DNA binding; F:single-stranded DNA binding; F:endodeoxyribonuclease activity; F:ATP binding; P:mitotic recombination; F:DNA-dependent ATPase activity; P:response to ionizing radiation; P:strand invasion	EC:3.6.1.3; EC:3.6.1.15	Adenosinetriphosphatase; Nucleoside-triphosphate phosphatase	IPR013765 (PRINTS); IPR023400 (G3DSA:3.30.250.GENE3D); IPR013765 (TIGRFAM); G3DSA:3.40.50.300 (GENE3D); IPR013765 (PFAM); PTHR22942 (PANTHER); PTHR22942:SF41 (PANTHER); IPR020588 (PROSITE_PROFILES); IPR020587 (PROSITE_PROFILES); IPR027417 (SUPERFAMILY)	F:GO:0003677; F:GO:0003697; F:GO:0005524; P:GO:0006259; P:GO:0006281; F:GO:0008094	F:DNA binding; F:single-stranded DNA binding; F:ATP binding; P:DNA metabolic process; P:DNA repair; F:DNA-dependent ATPase activity
HY10017_c0_g1_i5	DNA repair protein recA homolog 2, mitochondrial isoform X1	1829	20	0	84.55	11	F:GO:0000150; F:GO:0000400; P:GO:0000730; F:GO:0003690; F:GO:0003697; F:GO:0004520; F:GO:0005524; P:GO:0006312; F:GO:0008094; P:GO:0010212; P:GO:0042148	F:recombinase activity; F:four-way junction DNA binding; P:DNA recombinase assembly; F:double-stranded DNA binding; F:single-stranded DNA binding; F:endodeoxyribonuclease activity; F:ATP binding; P:mitotic recombination; F:DNA-dependent ATPase activity; P:response to ionizing radiation; P:strand invasion	EC:3.6.1.3; EC:3.6.1.15	Adenosinetriphosphatase; Nucleoside-triphosphate phosphatase	IPR013765 (PRINTS); IPR013765 (TIGRFAM); IPR023400 (G3DSA:3.30.250.GENE3D); G3DSA:3.40.50.300 (GENE3D); IPR013765 (PFAM); PTHR22942 (PANTHER); PTHR22942:SF41 (PANTHER); IPR020587 (PROSITE_PROFILES); IPR020588 (PROSITE_PROFILES); IPR027417 (SUPERFAMILY)	F:GO:0003677; F:GO:0003697; F:GO:0005524; P:GO:0006259; P:GO:0006281; F:GO:0008094	F:DNA binding; F:single-stranded DNA binding; F:ATP binding; P:DNA metabolic process; P:DNA repair; F:DNA-dependent ATPase activity
HY10017_c0_g1_i6	DNA repair protein recA homolog 2, mitochondrial isoform X1	230	20	5.24425e-23	94.7	5	F:GO:0003697; F:GO:0005524; P:GO:0006281; P:GO:0006310; F:GO:0008094	F:single-stranded DNA binding; F:ATP binding; P:DNA repair; P:DNA recombination; F:DNA-dependent ATPase activity	EC:3.6.1.3; EC:3.6.1.15	Adenosinetriphosphatase; Nucleoside-triphosphate phosphatase	no IPS match	no IPS match	no IPS match
HY10017_c0_g1_i7	DNA repair protein recA homolog 2, mitochondrial isoform X1	1818	20	0	84.9	11	F:GO:0000150; F:GO:0000400; P:GO:0000730; F:GO:0003690; F:GO:0003697; F:GO:0004520; F:GO:0005524; P:GO:0006312; F:GO:0008094; P:GO:0010212; P:GO:0042148	F:recombinase activity; F:four-way junction DNA binding; P:DNA recombinase assembly; F:double-stranded DNA binding; F:single-stranded DNA binding; F:endodeoxyribonuclease activity; F:ATP binding; P:mitotic recombination; F:DNA-dependent ATPase activity; P:response to ionizing radiation; P:strand invasion	EC:3.6.1.3; EC:3.6.1.15	Adenosinetriphosphatase; Nucleoside-triphosphate phosphatase	IPR013765 (PRINTS); IPR013765 (PFAM); G3DSA:3.40.50.300 (GENE3D); PTHR22942:SF41 (PANTHER); PTHR22942 (PANTHER); IPR020588 (PROSITE_PROFILES); IPR020587 (PROSITE_PROFILES); IPR027417 (SUPERFAMILY)	F:GO:0003677; F:GO:0003697; F:GO:0005524; P:GO:0006259; P:GO:0006281; F:GO:0008094	F:DNA binding; F:single-stranded DNA binding; F:ATP binding; P:DNA metabolic process; P:DNA repair; F:DNA-dependent ATPase activity
HY10017_c0_g1_i8	DNA repair protein recA homolog 2, mitochondrial isoform X1	1865	20	0	84	11	F:GO:0000150; F:GO:0000400; P:GO:0000730; F:GO:0003690; F:GO:0003697; F:GO:0004520; F:GO:0005524; P:GO:0006312; F:GO:0008094; P:GO:0010212; P:GO:0042148	F:recombinase activity; F:four-way junction DNA binding; P:DNA recombinase assembly; F:double-stranded DNA binding; F:single-stranded DNA binding; F:endodeoxyribonuclease activity; F:ATP binding; P:mitotic recombination; F:DNA-dependent ATPase activity; P:response to ionizing radiation; P:strand invasion	EC:3.6.1.3; EC:3.6.1.15	Adenosinetriphosphatase; Nucleoside-triphosphate phosphatase	IPR013765 (PRINTS); IPR013765 (PFAM); IPR023400 (G3DSA:3.30.250.GENE3D); G3DSA:3.40.50.300 (GENE3D); IPR013765 (TIGRFAM); PTHR22942:SF41 (PANTHER); PTHR22942 (PANTHER); IPR020588 (PROSITE_PROFILES); IPR020587 (PROSITE_PROFILES); IPR027417 (SUPERFAMILY)	F:GO:0003677; F:GO:0003697; F:GO:0005524; P:GO:0006259; P:GO:0006281; F:GO:0008094	F:DNA binding; F:single-stranded DNA binding; F:ATP binding; P:DNA metabolic process; P:DNA repair; F:DNA-dependent ATPase activity
HY10017_c0_g1_i9	DNA repair protein recA homolog 2, mitochondrial	374	20	4.72418e-51	81.05	6	F:GO:0003697; F:GO:0005524; P:GO:0006281; P:GO:0006310; F:GO:0008094; C:GO:0016020	F:single-stranded DNA binding; F:ATP binding; P:DNA repair; P:DNA recombination; F:DNA-dependent ATPase activity; C:membrane	EC:3.6.1.3; EC:3.6.1.15	Adenosinetriphosphatase; Nucleoside-triphosphate phosphatase	IPR013765 (PRINTS); IPR023400 (G3DSA:3.30.250.GENE3D); PTHR22942 (PANTHER); PTHR22942:SF41 (PANTHER)	F:GO:0003697; F:GO:0005524; P:GO:0006281	F:single-stranded DNA binding; F:ATP binding; P:DNA repair
HY10018_c0_g1_i1	dihydroneopterin aldolase 2-like isoform X1	2156	20	7.16438e-87	88.7	4	F:GO:0004150; P:GO:0046654; P:GO:0046656; F:GO:0102083	F:dihydroneopterin aldolase activity; P:tetrahydrofolate biosynthetic process; P:folic acid biosynthetic process; F:7,8-dihydromonapterin aldolase activity	EC:4.1.2.25	Dihydroneopterin aldolase	G3DSA:3.30.1130.10 (GENE3D); IPR006157 (PFAM); IPR006156 (TIGRFAM); IPR006157 (TIGRFAM); PTHR42844 (PANTHER); PTHR42844:SF3 (PANTHER); IPR006157 (CDD); SSF55620 (SUPERFAMILY)	F:GO:0004150; P:GO:0006760	F:dihydroneopterin aldolase activity; P:folic acid-containing compound metabolic process
HY10018_c0_g1_i2	dihydroneopterin aldolase 2-like isoform X1	772	20	1.25106e-64	89.65	4	F:GO:0004150; P:GO:0046654; P:GO:0046656; F:GO:0102083	F:dihydroneopterin aldolase activity; P:tetrahydrofolate biosynthetic process; P:folic acid biosynthetic process; F:7,8-dihydromonapterin aldolase activity	EC:4.1.2.25	Dihydroneopterin aldolase	IPR006157 (PFAM); IPR006157 (TIGRFAM); G3DSA:3.30.1130.10 (GENE3D); PTHR42844:SF4 (PANTHER); PTHR42844 (PANTHER); SSF55620 (SUPERFAMILY)	F:GO:0004150; P:GO:0006760	F:dihydroneopterin aldolase activity; P:folic acid-containing compound metabolic process
HY10018_c0_g1_i3	dihydroneopterin aldolase 2-like isoform X1	1042	20	2.17967e-91	88.7	4	F:GO:0004150; P:GO:0046654; P:GO:0046656; F:GO:0102083	F:dihydroneopterin aldolase activity; P:tetrahydrofolate biosynthetic process; P:folic acid biosynthetic process; F:7,8-dihydromonapterin aldolase activity	EC:4.1.2.25	Dihydroneopterin aldolase	G3DSA:3.30.1130.10 (GENE3D); IPR006157 (PFAM); IPR006156 (TIGRFAM); IPR006157 (TIGRFAM); PTHR42844 (PANTHER); PTHR42844:SF3 (PANTHER); IPR006157 (CDD); SSF55620 (SUPERFAMILY)	F:GO:0004150; P:GO:0006760	F:dihydroneopterin aldolase activity; P:folic acid-containing compound metabolic process
HY10018_c0_g1_i4	dihydroneopterin aldolase 2-like isoform X1	998	20	9.09234e-92	88.95	4	F:GO:0004150; P:GO:0046654; P:GO:0046656; F:GO:0102083	F:dihydroneopterin aldolase activity; P:tetrahydrofolate biosynthetic process; P:folic acid biosynthetic process; F:7,8-dihydromonapterin aldolase activity	EC:4.1.2.25	Dihydroneopterin aldolase	IPR006156 (TIGRFAM); IPR006157 (PFAM); G3DSA:3.30.1130.10 (GENE3D); IPR006157 (TIGRFAM); PTHR42844:SF3 (PANTHER); PTHR42844 (PANTHER); IPR006157 (CDD); SSF55620 (SUPERFAMILY)	F:GO:0004150; P:GO:0006760	F:dihydroneopterin aldolase activity; P:folic acid-containing compound metabolic process
HY10018_c0_g1_i5	dihydroneopterin aldolase 2-like isoform X1	2304	20	1.97691e-37	89.6	4	F:GO:0004150; P:GO:0046654; P:GO:0046656; F:GO:0102083	F:dihydroneopterin aldolase activity; P:tetrahydrofolate biosynthetic process; P:folic acid biosynthetic process; F:7,8-dihydromonapterin aldolase activity	EC:4.1.2.25	Dihydroneopterin aldolase	no IPS match	no IPS match	no IPS match
HY10018_c0_g1_i6	dihydroneopterin aldolase 2-like isoform X1	2154	20	7.00947e-87	88.7	4	F:GO:0004150; P:GO:0046654; P:GO:0046656; F:GO:0102083	F:dihydroneopterin aldolase activity; P:tetrahydrofolate biosynthetic process; P:folic acid biosynthetic process; F:7,8-dihydromonapterin aldolase activity	EC:4.1.2.25	Dihydroneopterin aldolase	G3DSA:3.30.1130.10 (GENE3D); IPR006157 (PFAM); IPR006156 (TIGRFAM); IPR006157 (TIGRFAM); PTHR42844 (PANTHER); PTHR42844:SF3 (PANTHER); IPR006157 (CDD); SSF55620 (SUPERFAMILY)	F:GO:0004150; P:GO:0006760	F:dihydroneopterin aldolase activity; P:folic acid-containing compound metabolic process
HY10018_c0_g1_i7	dihydroneopterin aldolase 2-like isoform X1	2302	20	1.9701e-37	89.6	4	F:GO:0004150; P:GO:0046654; P:GO:0046656; F:GO:0102083	F:dihydroneopterin aldolase activity; P:tetrahydrofolate biosynthetic process; P:folic acid biosynthetic process; F:7,8-dihydromonapterin aldolase activity	EC:4.1.2.25	Dihydroneopterin aldolase	no IPS match	no IPS match	no IPS match
HY10018_c0_g1_i8	dihydroneopterin aldolase 2-like isoform X1	870	20	1.14495e-38	86.1	4	F:GO:0004150; P:GO:0046654; P:GO:0046656; F:GO:0102083	F:dihydroneopterin aldolase activity; P:tetrahydrofolate biosynthetic process; P:folic acid biosynthetic process; F:7,8-dihydromonapterin aldolase activity	EC:4.1.2.25	Dihydroneopterin aldolase	IPR006157 (PFAM); G3DSA:3.30.1130.10 (GENE3D); IPR006157 (TIGRFAM); PTHR42844 (PANTHER); PTHR42844:SF4 (PANTHER); SSF55620 (SUPERFAMILY)	F:GO:0004150; P:GO:0006760	F:dihydroneopterin aldolase activity; P:folic acid-containing compound metabolic process
HY10018_c1_g1_i1	proline iminopeptidase	1712	20	0	89.1	4	F:GO:0004177; C:GO:0005829; P:GO:0006508; C:GO:0009507	F:aminopeptidase activity; C:cytosol; P:proteolysis; C:chloroplast	EC:3.4.11	Acting on peptide bonds (peptidases)	IPR002410 (PRINTS); IPR000073 (PRINTS); IPR000073 (PFAM); IPR005944 (TIGRFAM); IPR029058 (G3DSA:3.40.50.GENE3D); IPR005944 (PANTHER); IPR029058 (SUPERFAMILY)	F:GO:0004177; C:GO:0005737; P:GO:0006508; F:GO:0008233	F:aminopeptidase activity; C:cytoplasm; P:proteolysis; F:peptidase activity
HY10018_c1_g1_i2	proline iminopeptidase	1229	20	8.28266e-61	95.45	4	F:GO:0004177; C:GO:0005829; P:GO:0006508; C:GO:0009507	F:aminopeptidase activity; C:cytosol; P:proteolysis; C:chloroplast	EC:3.4.11	Acting on peptide bonds (peptidases)	IPR029058 (G3DSA:3.40.50.GENE3D); IPR005944 (PANTHER); IPR029058 (SUPERFAMILY)	F:GO:0004177; C:GO:0005737; P:GO:0006508	F:aminopeptidase activity; C:cytoplasm; P:proteolysis
HY10018_c1_g1_i3	proline iminopeptidase	1080	20	1.17834e-32	92	3	F:GO:0004177; C:GO:0005737; P:GO:0006508	F:aminopeptidase activity; C:cytoplasm; P:proteolysis	EC:3.4.11	Acting on peptide bonds (peptidases)	no IPS match	no IPS match	no IPS match
HY10018_c1_g1_i4	proline iminopeptidase	1659	20	0	95.35	4	F:GO:0004177; C:GO:0005829; P:GO:0006508; C:GO:0009507	F:aminopeptidase activity; C:cytosol; P:proteolysis; C:chloroplast	EC:3.4.11	Acting on peptide bonds (peptidases)	IPR029058 (G3DSA:3.40.50.GENE3D); IPR000073 (PFAM); IPR005944 (TIGRFAM); IPR005944 (PANTHER); IPR029058 (SUPERFAMILY)	F:GO:0004177; C:GO:0005737; P:GO:0006508	F:aminopeptidase activity; C:cytoplasm; P:proteolysis
HY10018_c1_g1_i5	proline iminopeptidase	234	20	2.29796e-13	100	3	F:GO:0004177; C:GO:0005737; P:GO:0006508	F:aminopeptidase activity; C:cytoplasm; P:proteolysis	EC:3.4.11	Acting on peptide bonds (peptidases)	no IPS match	no IPS match	no IPS match
HY10018_c1_g1_i6	proline iminopeptidase	1848	20	0	92.05	4	F:GO:0004177; C:GO:0005829; P:GO:0006508; C:GO:0009507	F:aminopeptidase activity; C:cytosol; P:proteolysis; C:chloroplast	EC:3.4.11	Acting on peptide bonds (peptidases)	IPR000073 (PRINTS); IPR002410 (PRINTS); IPR005944 (TIGRFAM); IPR000073 (PFAM); IPR005944 (PIRSF); IPR029058 (G3DSA:3.40.50.GENE3D); IPR005944 (PANTHER); IPR029058 (SUPERFAMILY)	F:GO:0004177; C:GO:0005737; P:GO:0006508; F:GO:0008233	F:aminopeptidase activity; C:cytoplasm; P:proteolysis; F:peptidase activity
HY10018_c1_g2_i1	proline iminopeptidase isoform X2	506	20	2.27554e-39	95.25	3	F:GO:0004177; C:GO:0005737; P:GO:0006508	F:aminopeptidase activity; C:cytoplasm; P:proteolysis	EC:3.4.11	Acting on peptide bonds (peptidases)	IPR029058 (G3DSA:3.40.50.GENE3D); IPR005944 (PANTHER)	F:GO:0004177; C:GO:0005737; P:GO:0006508	F:aminopeptidase activity; C:cytoplasm; P:proteolysis
HY10018_c1_g3_i1	---NA---	614									no IPS match	no IPS match	no IPS match
HY10019_c0_g1_i1	probable leucine-rich repeat receptor-like protein kinase At5g63930	2781	20	0	84	5	F:GO:0004672; F:GO:0005524; C:GO:0005886; P:GO:0006468; C:GO:0016021	F:protein kinase activity; F:ATP binding; C:plasma membrane; P:protein phosphorylation; C:integral component of membrane			IPR032675 (G3DSA:3.80.10.GENE3D); IPR013210 (PFAM); IPR032675 (G3DSA:3.80.10.GENE3D); IPR032675 (G3DSA:3.80.10.GENE3D); IPR032675 (G3DSA:3.80.10.GENE3D); mobidb-lite (MOBIDB_LITE); PTHR27000 (PANTHER); PTHR27000:SF434 (PANTHER); IPR032675 (SUPERFAMILY); IPR032675 (SUPERFAMILY)	no GO terms	no GO terms
HY10019_c0_g1_i2	---NA---	336									no IPS match	no IPS match	no IPS match
HY10019_c0_g1_i3	probable leucine-rich repeat receptor-like protein kinase At5g63930	4092	20	0	87.15	5	F:GO:0004672; F:GO:0005524; C:GO:0005886; P:GO:0006468; C:GO:0016021	F:protein kinase activity; F:ATP binding; C:plasma membrane; P:protein phosphorylation; C:integral component of membrane			IPR013210 (PFAM); G3DSA:1.10.510.10 (GENE3D); IPR032675 (G3DSA:3.80.10.GENE3D); IPR032675 (G3DSA:3.80.10.GENE3D); IPR032675 (G3DSA:3.80.10.GENE3D); G3DSA:3.30.200.20 (GENE3D); IPR032675 (G3DSA:3.80.10.GENE3D); IPR000719 (PFAM); mobidb-lite (MOBIDB_LITE); PTHR27000 (PANTHER); PTHR27000:SF434 (PANTHER); IPR000719 (PROSITE_PROFILES); IPR032675 (SUPERFAMILY); IPR011009 (SUPERFAMILY); IPR032675 (SUPER…	F:GO:0004672; F:GO:0005524; P:GO:0006468	F:protein kinase activity; F:ATP binding; P:protein phosphorylation
HY1002_c0_g1_i1	---NA---	340									no IPS match	no IPS match	no IPS match
HY10020_c0_g1_i1	---NA---	362									no IPS match	no IPS match	no IPS match
HY10020_c0_g1_i10	probable amino-acid racemase	859	20	2.5636e-85	89.45	3	P:GO:0006520; C:GO:0009507; F:GO:0036361	P:cellular amino acid metabolic process; C:chloroplast; F:racemase activity, acting on amino acids and derivatives			G3DSA:3.40.50.1860 (GENE3D); IPR004380 (PTHR21198:PANTHER); PTHR21198 (PANTHER); IPR001920 (SUPERFAMILY)	P:GO:0006520; P:GO:0008152; F:GO:0016855	P:cellular amino acid metabolic process; P:metabolic process; F:racemase and epimerase activity, acting on amino acids and derivatives
HY10020_c0_g1_i11	nudix hydrolase 19, chloroplastic	2829	20	6.43833e-147	80.6	3	F:GO:0016787; C:GO:0044444; F:GO:0046872	F:hydrolase activity; C:cytoplasmic part; F:metal ion binding			IPR015375 (PFAM); IPR015376 (PFAM); PTHR42904 (PANTHER); PTHR42904:SF2 (PANTHER); IPR015797 (SUPERFAMILY)	F:GO:0016787; F:GO:0046872	F:hydrolase activity; F:metal ion binding
HY10020_c0_g1_i12	nudix hydrolase 19, chloroplastic	1237	20	1.36866e-153	81.55	4	C:GO:0005829; C:GO:0009507; F:GO:0016787; F:GO:0046872	C:cytosol; C:chloroplast; F:hydrolase activity; F:metal ion binding			IPR015375 (PFAM); IPR015376 (PFAM); PTHR42904 (PANTHER); PTHR42904:SF2 (PANTHER); IPR015797 (SUPERFAMILY)	F:GO:0016787; F:GO:0046872	F:hydrolase activity; F:metal ion binding
HY10020_c0_g1_i13	probable amino-acid racemase	883	20	6.42638e-91	90.35	3	P:GO:0006520; C:GO:0009507; F:GO:0036361	P:cellular amino acid metabolic process; C:chloroplast; F:racemase activity, acting on amino acids and derivatives			G3DSA:3.40.50.1860 (GENE3D); IPR004380 (PTHR21198:PANTHER); PTHR21198 (PANTHER); IPR001920 (SUPERFAMILY)	P:GO:0006520; P:GO:0008152; F:GO:0016855	P:cellular amino acid metabolic process; P:metabolic process; F:racemase and epimerase activity, acting on amino acids and derivatives
HY10020_c0_g1_i2	nudix hydrolase 19, chloroplastic	2365	20	1.38586e-171	91.65	4	F:GO:0000210; C:GO:0005829; C:GO:0009507; F:GO:0046872	F:NAD+ diphosphatase activity; C:cytosol; C:chloroplast; F:metal ion binding	EC:3.6.1.22; EC:3.6.1.9	NAD(+) diphosphatase; Nucleotide diphosphatase	IPR020476 (PRINTS); G3DSA:3.90.79.10 (GENE3D); IPR000086 (PFAM); IPR015376 (PFAM); PTHR42904 (PANTHER); PTHR42904:SF2 (PANTHER); IPR000086 (PROSITE_PROFILES); cd03429 (CDD); IPR015797 (SUPERFAMILY)	F:GO:0016787; F:GO:0046872	F:hydrolase activity; F:metal ion binding
HY10020_c0_g1_i3	nudix hydrolase 19, chloroplastic	2489	20	0	86.55	4	C:GO:0005829; C:GO:0009507; F:GO:0016787; F:GO:0046872	C:cytosol; C:chloroplast; F:hydrolase activity; F:metal ion binding			IPR020476 (PRINTS); IPR015375 (PFAM); IPR015376 (PFAM); G3DSA:3.90.79.10 (GENE3D); IPR000086 (PFAM); PTHR42904 (PANTHER); PTHR42904:SF2 (PANTHER); IPR000086 (PROSITE_PROFILES); cd03429 (CDD); IPR015797 (SUPERFAMILY)	F:GO:0016787; F:GO:0046872	F:hydrolase activity; F:metal ion binding
HY10020_c0_g1_i4	nudix hydrolase 19, chloroplastic	3189	20	3.47925e-168	91.65	4	F:GO:0000210; C:GO:0005829; C:GO:0009507; F:GO:0046872	F:NAD+ diphosphatase activity; C:cytosol; C:chloroplast; F:metal ion binding	EC:3.6.1.22; EC:3.6.1.9	NAD(+) diphosphatase; Nucleotide diphosphatase	IPR020476 (PRINTS); G3DSA:3.90.79.10 (GENE3D); IPR000086 (PFAM); IPR015376 (PFAM); PTHR42904 (PANTHER); PTHR42904:SF2 (PANTHER); IPR000086 (PROSITE_PROFILES); cd03429 (CDD); IPR015797 (SUPERFAMILY)	F:GO:0016787; F:GO:0046872	F:hydrolase activity; F:metal ion binding
HY10020_c0_g1_i5	nudix hydrolase 19, chloroplastic	2417	20	2.96088e-163	80.7	4	C:GO:0005829; C:GO:0009507; F:GO:0016787; F:GO:0046872	C:cytosol; C:chloroplast; F:hydrolase activity; F:metal ion binding			IPR020476 (PRINTS); G3DSA:3.90.79.10 (GENE3D); IPR015376 (PFAM); IPR000086 (PFAM); PTHR42904 (PANTHER); PTHR42904:SF2 (PANTHER); IPR000086 (PROSITE_PROFILES); cd03429 (CDD); IPR015797 (SUPERFAMILY)	F:GO:0016787; F:GO:0046872	F:hydrolase activity; F:metal ion binding
HY10020_c0_g1_i6	nudix hydrolase 19, chloroplastic	1664	20	0	85.85	4	C:GO:0005829; C:GO:0009507; F:GO:0016787; F:GO:0046872	C:cytosol; C:chloroplast; F:hydrolase activity; F:metal ion binding			IPR020476 (PRINTS); IPR015376 (PFAM); IPR015375 (PFAM); IPR000086 (PFAM); G3DSA:3.90.79.10 (GENE3D); mobidb-lite (MOBIDB_LITE); PTHR42904:SF2 (PANTHER); PTHR42904 (PANTHER); IPR000086 (PROSITE_PROFILES); cd03429 (CDD); IPR015797 (SUPERFAMILY)	F:GO:0016787; F:GO:0046872	F:hydrolase activity; F:metal ion binding
HY10020_c0_g1_i7	nudix hydrolase 19, chloroplastic	2856	20	8.13812e-147	80.6	3	F:GO:0016787; C:GO:0044444; F:GO:0046872	F:hydrolase activity; C:cytoplasmic part; F:metal ion binding			IPR015375 (PFAM); IPR015376 (PFAM); PTHR42904 (PANTHER); PTHR42904:SF2 (PANTHER); IPR015797 (SUPERFAMILY)	F:GO:0016787; F:GO:0046872	F:hydrolase activity; F:metal ion binding
HY10020_c0_g1_i8	probable amino-acid racemase	4656	20	4.16169e-126	89.8	4	P:GO:0006520; F:GO:0016787; F:GO:0036361; F:GO:0046872	P:cellular amino acid metabolic process; F:hydrolase activity; F:racemase activity, acting on amino acids and derivatives; F:metal ion binding			IPR015942 (PFAM); G3DSA:3.40.50.1860 (GENE3D); G3DSA:3.40.50.1860 (GENE3D); IPR004380 (PTHR21198:PANTHER); PTHR21198 (PANTHER); IPR001920 (SUPERFAMILY); IPR001920 (SUPERFAMILY)	P:GO:0006520; P:GO:0006807; P:GO:0008152; F:GO:0016855; F:GO:0036361	P:cellular amino acid metabolic process; P:nitrogen compound metabolic process; P:metabolic process; F:racemase and epimerase activity, acting on amino acids and derivatives; F:racemase activity, acting on amino acids and derivatives
HY10020_c0_g1_i9	nudix hydrolase 19, chloroplastic	1389	20	4.40678e-162	87.9	4	C:GO:0005829; C:GO:0009507; F:GO:0016787; F:GO:0046872	C:cytosol; C:chloroplast; F:hydrolase activity; F:metal ion binding			IPR020476 (PRINTS); IPR000086 (PFAM); G3DSA:3.90.79.10 (GENE3D); PTHR42904 (PANTHER); PTHR42904:SF2 (PANTHER); IPR000086 (PROSITE_PROFILES); cd03429 (CDD); IPR015797 (SUPERFAMILY)	F:GO:0016787	F:hydrolase activity
HY10020_c0_g2_i1	probable amino-acid racemase	563	20	4.03802e-91	72.15	2	P:GO:0006520; F:GO:0036361	P:cellular amino acid metabolic process; F:racemase activity, acting on amino acids and derivatives			G3DSA:3.40.50.1860 (GENE3D); IPR004380 (PTHR21198:PANTHER); PTHR21198 (PANTHER)	P:GO:0006520; F:GO:0016855	P:cellular amino acid metabolic process; F:racemase and epimerase activity, acting on amino acids and derivatives
HY10020_c0_g2_i2	probable amino-acid racemase	911	20	3.73623e-90	72.8	2	P:GO:0006520; F:GO:0036361	P:cellular amino acid metabolic process; F:racemase activity, acting on amino acids and derivatives			G3DSA:3.40.50.1860 (GENE3D); PTHR21198 (PANTHER); IPR004380 (PTHR21198:PANTHER)	P:GO:0006520; F:GO:0016855	P:cellular amino acid metabolic process; F:racemase and epimerase activity, acting on amino acids and derivatives
HY10020_c0_g2_i3	probable amino-acid racemase	750	20	5.38188e-91	72.8	2	P:GO:0006520; F:GO:0036361	P:cellular amino acid metabolic process; F:racemase activity, acting on amino acids and derivatives			G3DSA:3.40.50.1860 (GENE3D); PTHR21198 (PANTHER); IPR004380 (PTHR21198:PANTHER)	P:GO:0006520; F:GO:0016855	P:cellular amino acid metabolic process; F:racemase and epimerase activity, acting on amino acids and derivatives
HY10020_c0_g3_i1	Thioredoxin superfamily protein isoform 3	238	20	2.921e-16	99	2	C:GO:0016021; P:GO:0055114	C:integral component of membrane; P:oxidation-reduction process			no IPS match	no IPS match	no IPS match
HY10020_c1_g1_i1	---NA---	448									no IPS match	no IPS match	no IPS match
HY10021_c0_g1_i1	putative concanavalin A-like lectin/glucanase domain, Xyloglucan endotransglucosylase/hydrolase	1262	20	1.15398e-170	69.8	5	F:GO:0004553; C:GO:0005576; P:GO:0010411; F:GO:0016762; P:GO:0042546	F:hydrolase activity, hydrolyzing O-glycosyl compounds; C:extracellular region; P:xyloglucan metabolic process; F:xyloglucan:xyloglucosyl transferase activity; P:cell wall biogenesis	EC:2.4.1.207	Xyloglucan:xyloglucosyl transferase	IPR016455 (PIRSF); IPR000757 (PFAM); G3DSA:2.60.120.200 (GENE3D); PTHR31062:SF62 (PANTHER); PTHR31062 (PANTHER); IPR000757 (PROSITE_PROFILES); IPR013320 (SUPERFAMILY)	F:GO:0004553; P:GO:0005975; P:GO:0010411; F:GO:0016762; P:GO:0042546	F:hydrolase activity, hydrolyzing O-glycosyl compounds; P:carbohydrate metabolic process; P:xyloglucan metabolic process; F:xyloglucan:xyloglucosyl transferase activity; P:cell wall biogenesis
HY10021_c0_g1_i2	putative concanavalin A-like lectin/glucanase domain, Xyloglucan endotransglucosylase/hydrolase	1264	20	4.89355e-174	70.35	5	F:GO:0004553; C:GO:0005576; P:GO:0010411; F:GO:0016762; P:GO:0042546	F:hydrolase activity, hydrolyzing O-glycosyl compounds; C:extracellular region; P:xyloglucan metabolic process; F:xyloglucan:xyloglucosyl transferase activity; P:cell wall biogenesis	EC:2.4.1.207	Xyloglucan:xyloglucosyl transferase	IPR000757 (PFAM); G3DSA:2.60.120.200 (GENE3D); IPR016455 (PIRSF); PTHR31062:SF62 (PANTHER); PTHR31062 (PANTHER); IPR000757 (PROSITE_PROFILES); IPR013320 (SUPERFAMILY)	F:GO:0004553; P:GO:0005975; P:GO:0010411; F:GO:0016762; P:GO:0042546	F:hydrolase activity, hydrolyzing O-glycosyl compounds; P:carbohydrate metabolic process; P:xyloglucan metabolic process; F:xyloglucan:xyloglucosyl transferase activity; P:cell wall biogenesis
HY10021_c0_g1_i3	putative concanavalin A-like lectin/glucanase domain, Xyloglucan endotransglucosylase/hydrolase	1604	20	7.18634e-169	69.8	5	F:GO:0004553; C:GO:0005576; P:GO:0010411; F:GO:0016762; P:GO:0042546	F:hydrolase activity, hydrolyzing O-glycosyl compounds; C:extracellular region; P:xyloglucan metabolic process; F:xyloglucan:xyloglucosyl transferase activity; P:cell wall biogenesis	EC:2.4.1.207	Xyloglucan:xyloglucosyl transferase	IPR016455 (PIRSF); IPR000757 (PFAM); G3DSA:2.60.120.200 (GENE3D); PTHR31062:SF62 (PANTHER); PTHR31062 (PANTHER); IPR000757 (PROSITE_PROFILES); IPR013320 (SUPERFAMILY)	F:GO:0004553; P:GO:0005975; P:GO:0010411; F:GO:0016762; P:GO:0042546	F:hydrolase activity, hydrolyzing O-glycosyl compounds; P:carbohydrate metabolic process; P:xyloglucan metabolic process; F:xyloglucan:xyloglucosyl transferase activity; P:cell wall biogenesis
HY10021_c0_g2_i1	BTB/POZ domain-containing protein POB1-like	1940	20	0	94.95	6	F:GO:0004842; F:GO:0005515; C:GO:0005634; P:GO:0010114; P:GO:0016567; C:GO:0031463	F:ubiquitin-protein transferase activity; F:protein binding; C:nucleus; P:response to red light; P:protein ubiquitination; C:Cul3-RING ubiquitin ligase complex			G3DSA:3.30.710.10 (GENE3D); IPR000210 (PFAM); IPR011705 (PFAM); IPR008974 (G3DSA:2.60.210.GENE3D); mobidb-lite (MOBIDB_LITE); PTHR24412 (PANTHER); PTHR24412:SF148 (PANTHER); IPR000210 (PROSITE_PROFILES); IPR008974 (SUPERFAMILY); IPR011333 (SUPERFAMILY)	F:GO:0005515	F:protein binding
HY10021_c0_g2_i2	BTB/POZ domain-containing protein POB1-like	4040	20	0	97.25	6	F:GO:0004842; F:GO:0005515; C:GO:0005634; P:GO:0010114; P:GO:0016567; C:GO:0031463	F:ubiquitin-protein transferase activity; F:protein binding; C:nucleus; P:response to red light; P:protein ubiquitination; C:Cul3-RING ubiquitin ligase complex			IPR008974 (G3DSA:2.60.210.GENE3D); G3DSA:3.30.710.10 (GENE3D); IPR000210 (PFAM); IPR011705 (PFAM); PTHR24412 (PANTHER); PTHR24412:SF148 (PANTHER); IPR000210 (PROSITE_PROFILES); IPR011333 (SUPERFAMILY); IPR008974 (SUPERFAMILY)	F:GO:0005515	F:protein binding
HY10021_c0_g2_i3	BTB/POZ domain-containing protein POB1-like	2391	20	0	80	1	F:GO:0005515	F:protein binding			G3DSA:3.30.710.10 (GENE3D); IPR011705 (PFAM); IPR008974 (G3DSA:2.60.210.GENE3D); PTHR24412 (PANTHER); PTHR24412:SF148 (PANTHER); IPR008974 (SUPERFAMILY)	F:GO:0005515	F:protein binding
HY10021_c0_g2_i4	BTB/POZ domain-containing protein POB1-like	2064	20	0	94.95	6	F:GO:0004842; F:GO:0005515; C:GO:0005634; P:GO:0010114; P:GO:0016567; C:GO:0031463	F:ubiquitin-protein transferase activity; F:protein binding; C:nucleus; P:response to red light; P:protein ubiquitination; C:Cul3-RING ubiquitin ligase complex			G3DSA:3.30.710.10 (GENE3D); IPR000210 (PFAM); IPR011705 (PFAM); IPR008974 (G3DSA:2.60.210.GENE3D); mobidb-lite (MOBIDB_LITE); PTHR24412 (PANTHER); PTHR24412:SF148 (PANTHER); IPR000210 (PROSITE_PROFILES); IPR008974 (SUPERFAMILY); IPR011333 (SUPERFAMILY)	F:GO:0005515	F:protein binding
HY10021_c0_g2_i5	---NA---	220									no IPS match	no IPS match	no IPS match
HY10021_c0_g2_i6	BTB/POZ domain-containing protein POB1-like	2199	20	0	86.95	6	F:GO:0004842; F:GO:0005515; C:GO:0005634; P:GO:0010114; P:GO:0016567; C:GO:0031463	F:ubiquitin-protein transferase activity; F:protein binding; C:nucleus; P:response to red light; P:protein ubiquitination; C:Cul3-RING ubiquitin ligase complex			IPR008974 (G3DSA:2.60.210.GENE3D); IPR011705 (PFAM); PTHR24412:SF148 (PANTHER); PTHR24412 (PANTHER); IPR008974 (SUPERFAMILY)	F:GO:0005515	F:protein binding
HY10021_c0_g2_i7	BTB/POZ domain-containing protein POB1-like	2904	20	0	94.3	6	F:GO:0004842; F:GO:0005515; C:GO:0005634; P:GO:0010114; P:GO:0016567; C:GO:0031463	F:ubiquitin-protein transferase activity; F:protein binding; C:nucleus; P:response to red light; P:protein ubiquitination; C:Cul3-RING ubiquitin ligase complex			IPR008974 (G3DSA:2.60.210.GENE3D); G3DSA:3.30.710.10 (GENE3D); IPR000210 (PFAM); IPR011705 (PFAM); mobidb-lite (MOBIDB_LITE); PTHR24412 (PANTHER); PTHR24412:SF148 (PANTHER); IPR000210 (PROSITE_PROFILES); IPR011333 (SUPERFAMILY); IPR008974 (SUPERFAMILY)	F:GO:0005515	F:protein binding
HY10021_c0_g2_i8	BTB/POZ domain-containing protein POB1-like	3103	20	0	97.25	6	F:GO:0004842; F:GO:0005515; C:GO:0005634; P:GO:0010114; P:GO:0016567; C:GO:0031463	F:ubiquitin-protein transferase activity; F:protein binding; C:nucleus; P:response to red light; P:protein ubiquitination; C:Cul3-RING ubiquitin ligase complex			IPR008974 (G3DSA:2.60.210.GENE3D); G3DSA:3.30.710.10 (GENE3D); IPR000210 (PFAM); IPR011705 (PFAM); PTHR24412 (PANTHER); PTHR24412:SF148 (PANTHER); IPR000210 (PROSITE_PROFILES); IPR011333 (SUPERFAMILY); IPR008974 (SUPERFAMILY)	F:GO:0005515	F:protein binding
HY10022_c0_g1_i1	ubiquitin-conjugating enzyme E2 7	244	20	1.42233e-21	98.2	6	P:GO:0000209; F:GO:0005524; C:GO:0005737; P:GO:0006511; F:GO:0031625; F:GO:0061630	P:protein polyubiquitination; F:ATP binding; C:cytoplasm; P:ubiquitin-dependent protein catabolic process; F:ubiquitin protein ligase binding; F:ubiquitin protein ligase activity			IPR000608 (PFAM); IPR016135 (G3DSA:3.10.110.GENE3D); mobidb-lite (MOBIDB_LITE); PTHR24067 (PANTHER); PTHR24067:SF174 (PANTHER); IPR016135 (SUPERFAMILY)	no GO terms	no GO terms
HY10022_c0_g1_i2	ubiquitin-conjugating enzyme E2 7	417	20	3.94679e-20	96.1	6	P:GO:0000209; F:GO:0005524; C:GO:0005737; P:GO:0006511; F:GO:0031625; F:GO:0061630	P:protein polyubiquitination; F:ATP binding; C:cytoplasm; P:ubiquitin-dependent protein catabolic process; F:ubiquitin protein ligase binding; F:ubiquitin protein ligase activity			IPR000608 (PFAM); IPR016135 (G3DSA:3.10.110.GENE3D); mobidb-lite (MOBIDB_LITE); PTHR24067 (PANTHER); PTHR24067:SF174 (PANTHER); IPR016135 (SUPERFAMILY)	no GO terms	no GO terms
HY10022_c0_g1_i3	---NA---	235									no IPS match	no IPS match	no IPS match
HY10022_c0_g1_i4	ubiquitin-conjugating enzyme E2 7	2056	20	1.27807e-49	96.4	1	F:GO:0005524	F:ATP binding			no IPS match	no IPS match	no IPS match
HY10022_c0_g1_i5	ubiquitin-conjugating enzyme E2 7	2067	20	1.33623e-49	94.6	1	F:GO:0005524	F:ATP binding			no IPS match	no IPS match	no IPS match
HY10022_c0_g1_i6	ubiquitin-conjugating enzyme E2 7	540	20	3.95339e-20	98.2	6	P:GO:0000209; F:GO:0005524; C:GO:0005737; P:GO:0006511; F:GO:0031625; F:GO:0061630	P:protein polyubiquitination; F:ATP binding; C:cytoplasm; P:ubiquitin-dependent protein catabolic process; F:ubiquitin protein ligase binding; F:ubiquitin protein ligase activity			IPR000608 (PFAM); IPR016135 (G3DSA:3.10.110.GENE3D); mobidb-lite (MOBIDB_LITE); PTHR24067 (PANTHER); PTHR24067:SF174 (PANTHER); IPR016135 (SUPERFAMILY)	no GO terms	no GO terms
HY10022_c0_g1_i7	ubiquitin-conjugating enzyme E2 7	2232	20	2.30098e-49	96.4	1	F:GO:0005524	F:ATP binding			no IPS match	no IPS match	no IPS match
HY10022_c0_g2_i1	ubiquitin-conjugating enzyme E2 7	549	20	9.82713e-46	98.3	2	F:GO:0005524; F:GO:0016874	F:ATP binding; F:ligase activity			IPR000608 (PFAM); IPR016135 (G3DSA:3.10.110.GENE3D); PTHR24067 (PANTHER); PTHR24067:SF237 (PANTHER); IPR000608 (PROSITE_PROFILES); IPR000608 (CDD); IPR016135 (SUPERFAMILY)	no GO terms	no GO terms
HY10022_c0_g2_i2	ubiquitin-conjugating enzyme E2 7	1641	20	7.2664e-50	92	1	F:GO:0005524	F:ATP binding			IPR000608 (PFAM); IPR016135 (G3DSA:3.10.110.GENE3D); PTHR24067 (PANTHER); PTHR24067:SF237 (PANTHER); IPR000608 (PROSITE_PROFILES); IPR016135 (SUPERFAMILY)	no GO terms	no GO terms
HY10022_c0_g2_i3	ubiquitin-conjugating enzyme E2 7	290	20	2.26618e-19	96.7	6	P:GO:0000209; F:GO:0005524; C:GO:0005737; P:GO:0006511; F:GO:0031625; F:GO:0061630	P:protein polyubiquitination; F:ATP binding; C:cytoplasm; P:ubiquitin-dependent protein catabolic process; F:ubiquitin protein ligase binding; F:ubiquitin protein ligase activity			IPR000608 (PFAM); IPR016135 (G3DSA:3.10.110.GENE3D); PTHR24067 (PANTHER); PTHR24067:SF237 (PANTHER); IPR000608 (PROSITE_PROFILES); IPR016135 (SUPERFAMILY)	no GO terms	no GO terms
HY10022_c0_g2_i4	---NA---	252									no IPS match	no IPS match	no IPS match
HY10022_c0_g2_i5	ubiquitin-conjugating enzyme E2 7	2332	20	6.08992e-75	93.05	1	F:GO:0005524	F:ATP binding			IPR016135 (G3DSA:3.10.110.GENE3D); IPR000608 (PFAM); PTHR24067 (PANTHER); PTHR24067:SF237 (PANTHER); IPR000608 (PROSITE_PROFILES); IPR000608 (CDD); IPR016135 (SUPERFAMILY)	no GO terms	no GO terms
HY10022_c0_g2_i6	ubiquitin-conjugating enzyme E2 7	1384	20	1.32408e-50	92	1	F:GO:0005524	F:ATP binding			IPR000608 (PFAM); IPR016135 (G3DSA:3.10.110.GENE3D); PTHR24067 (PANTHER); PTHR24067:SF237 (PANTHER); IPR000608 (PROSITE_PROFILES); IPR016135 (SUPERFAMILY)	no GO terms	no GO terms
HY10022_c0_g2_i7	ubiquitin-conjugating enzyme E2 7	665	20	3.05565e-72	98	1	F:GO:0005524	F:ATP binding			IPR000608 (PFAM); IPR016135 (G3DSA:3.10.110.GENE3D); PTHR24067 (PANTHER); PTHR24067:SF237 (PANTHER); IPR000608 (PROSITE_PROFILES); IPR000608 (CDD); IPR016135 (SUPERFAMILY)	no GO terms	no GO terms
HY10022_c0_g2_i8	ubiquitin-conjugating enzyme E2 7	2423	20	2.01725e-47	90.9	6	P:GO:0000209; F:GO:0005524; C:GO:0005737; P:GO:0006511; F:GO:0031625; F:GO:0061630	P:protein polyubiquitination; F:ATP binding; C:cytoplasm; P:ubiquitin-dependent protein catabolic process; F:ubiquitin protein ligase binding; F:ubiquitin protein ligase activity			IPR016135 (G3DSA:3.10.110.GENE3D); IPR000608 (PFAM); PTHR24067 (PANTHER); PTHR24067:SF237 (PANTHER); IPR000608 (PROSITE_PROFILES); IPR000608 (CDD); IPR016135 (SUPERFAMILY)	no GO terms	no GO terms
HY10022_c1_g1_i1	flocculation protein FLO11	2435	20	5.96434e-08	96						no IPS match	no IPS match	no IPS match
HY10022_c2_g1_i1	transcription initiation factor TFIID subunit 8-like	2234	20	0	82.35	3	F:GO:0003743; P:GO:0006413; F:GO:0046982	F:translation initiation factor activity; P:translational initiation; F:protein heterodimerization activity			IPR019473 (PFAM); IPR006565 (PFAM); mobidb-lite (MOBIDB_LITE); PTHR12321:SF53 (PANTHER); PTHR12321 (PANTHER); IPR019473 (CDD)	no GO terms	no GO terms
HY10022_c2_g1_i2	transcription initiation factor TFIID subunit 8-like	2100	20	0	82.35	3	F:GO:0003743; P:GO:0006413; F:GO:0046982	F:translation initiation factor activity; P:translational initiation; F:protein heterodimerization activity			IPR019473 (PFAM); IPR006565 (PFAM); mobidb-lite (MOBIDB_LITE); PTHR12321:SF53 (PANTHER); PTHR12321 (PANTHER); IPR019473 (CDD)	no GO terms	no GO terms
HY10022_c2_g1_i3	transcription initiation factor TFIID subunit 8-like	3232	20	0	82.35	3	F:GO:0003743; P:GO:0006413; F:GO:0046982	F:translation initiation factor activity; P:translational initiation; F:protein heterodimerization activity			IPR019473 (PFAM); IPR006565 (PFAM); mobidb-lite (MOBIDB_LITE); PTHR12321:SF53 (PANTHER); PTHR12321 (PANTHER); IPR019473 (CDD)	no GO terms	no GO terms
HY10022_c2_g1_i4	transcription initiation factor TFIID subunit 8-like	4677	20	0	82.35	3	F:GO:0003743; P:GO:0006413; F:GO:0046982	F:translation initiation factor activity; P:translational initiation; F:protein heterodimerization activity			IPR019473 (PFAM); IPR006565 (PFAM); mobidb-lite (MOBIDB_LITE); PTHR12321:SF53 (PANTHER); PTHR12321 (PANTHER); IPR019473 (CDD)	no GO terms	no GO terms
HY10022_c2_g1_i5	transcription initiation factor TFIID subunit 8-like	4691	20	0	82.35	3	F:GO:0003743; P:GO:0006413; F:GO:0046982	F:translation initiation factor activity; P:translational initiation; F:protein heterodimerization activity			IPR019473 (PFAM); IPR006565 (PFAM); mobidb-lite (MOBIDB_LITE); PTHR12321:SF53 (PANTHER); PTHR12321 (PANTHER); IPR019473 (CDD)	no GO terms	no GO terms
HY10023_c0_g1_i1	protein FAR1-RELATED SEQUENCE 6-like	2050	20	0	89.1	2	P:GO:0006355; F:GO:0008270	P:regulation of transcription, DNA-templated; F:zinc ion binding			IPR018289 (PFAM); IPR004330 (PFAM); PTHR31669:SF10 (PANTHER); IPR031052 (PANTHER)	P:GO:0006355	P:regulation of transcription, DNA-templated
HY10023_c0_g1_i2	protein FAR1-RELATED SEQUENCE 6-like	2430	20	0	90.9	2	P:GO:0006355; F:GO:0008270	P:regulation of transcription, DNA-templated; F:zinc ion binding			IPR007527 (PFAM); IPR004330 (PFAM); IPR018289 (PFAM); mobidb-lite (MOBIDB_LITE); IPR031052 (PANTHER); PTHR31669:SF10 (PANTHER); IPR007527 (PROSITE_PROFILES)	P:GO:0006355; F:GO:0008270	P:regulation of transcription, DNA-templated; F:zinc ion binding
HY10023_c0_g1_i3	protein FAR1-RELATED SEQUENCE 6-like	1538	20	0	89.1	2	P:GO:0006355; F:GO:0008270	P:regulation of transcription, DNA-templated; F:zinc ion binding			IPR018289 (PFAM); IPR004330 (PFAM); mobidb-lite (MOBIDB_LITE); PTHR31669:SF10 (PANTHER); IPR031052 (PANTHER)	P:GO:0006355	P:regulation of transcription, DNA-templated
HY10023_c0_g1_i4	protein FAR1-RELATED SEQUENCE 6-like	2942	20	0	90.9	2	P:GO:0006355; F:GO:0008270	P:regulation of transcription, DNA-templated; F:zinc ion binding			IPR018289 (PFAM); IPR004330 (PFAM); IPR007527 (PFAM); PTHR31669:SF10 (PANTHER); IPR031052 (PANTHER); IPR007527 (PROSITE_PROFILES)	P:GO:0006355; F:GO:0008270	P:regulation of transcription, DNA-templated; F:zinc ion binding
HY10024_c0_g1_i1	---NA---	1007									no IPS match	no IPS match	no IPS match
HY10024_c1_g1_i1	PREDICTED: uncharacterized protein LOC102609307	1063	20	1.07601e-45	91.5	1	C:GO:0016021	C:integral component of membrane			PTHR34673 (PANTHER)	no GO terms	no GO terms
HY10024_c1_g1_i2	hypothetical protein CICLE_v10013249mg	1098	20	5.07047e-46	92.9	1	C:GO:0016021	C:integral component of membrane			no IPS match	no IPS match	no IPS match
HY10024_c1_g1_i3	hypothetical protein CICLE_v10013249mg	1050	20	3.36941e-46	92.9	1	C:GO:0016021	C:integral component of membrane			no IPS match	no IPS match	no IPS match
HY10024_c1_g1_i4	PREDICTED: uncharacterized protein LOC102609307	1015	20	7.09368e-46	91.5	1	C:GO:0016021	C:integral component of membrane			PTHR34673 (PANTHER)	no GO terms	no GO terms
HY10024_c1_g1_i5	---NA---	259									no IPS match	no IPS match	no IPS match
HY10024_c1_g2_i1	beta-fructofuranosidase, insoluble isoenzyme CWINV6-like	2649	20	0	82.85	2	F:GO:0004553; P:GO:0005975	F:hydrolase activity, hydrolyzing O-glycosyl compounds; P:carbohydrate metabolic process			IPR013148 (PFAM); IPR013189 (PFAM); G3DSA:2.60.120.560 (GENE3D); IPR023296 (G3DSA:2.115.10.GENE3D); PTHR31953 (PANTHER); PTHR31953:SF14 (PANTHER); cd08996 (CDD); IPR013320 (SUPERFAMILY); IPR023296 (SUPERFAMILY)	no GO terms	no GO terms
HY10024_c1_g2_i2	beta-fructofuranosidase, insoluble isoenzyme CWINV6-like	2760	20	0	79.55	2	F:GO:0004553; P:GO:0005975	F:hydrolase activity, hydrolyzing O-glycosyl compounds; P:carbohydrate metabolic process			IPR013148 (PFAM); IPR023296 (G3DSA:2.115.10.GENE3D); PTHR31953:SF14 (PANTHER); PTHR31953 (PANTHER); cd08996 (CDD); IPR023296 (SUPERFAMILY)	no GO terms	no GO terms
HY10024_c1_g3_i1	---NA---	432									mobidb-lite (MOBIDB_LITE); mobidb-lite (MOBIDB_LITE)	no GO terms	no GO terms
HY10024_c1_g3_i2	---NA---	208									mobidb-lite (MOBIDB_LITE)	no GO terms	no GO terms
HY10024_c3_g1_i1	---NA---	217									mobidb-lite (MOBIDB_LITE)	no GO terms	no GO terms
HY10024_c4_g1_i1	---NA---	333									no IPS match	no IPS match	no IPS match
HY10024_c5_g1_i1	---NA---	320									no IPS match	no IPS match	no IPS match
HY10024_c6_g1_i1	---NA---	284									no IPS match	no IPS match	no IPS match
HY10025_c0_g1_i1	malonyl CoA-acyl carrier protein transacylase	1449	20	0	87.4	3	F:GO:0004314; C:GO:0005737; P:GO:0006633	F:[acyl-carrier-protein] S-malonyltransferase activity; C:cytoplasm; P:fatty acid biosynthetic process	EC:2.3.1.85; EC:2.3.1.39	Fatty-acid synthase; [Acyl-carrier-protein] S-malonyltransferase	G3DSA:3.40.366.10 (GENE3D); IPR014043 (PFAM); PTHR42681 (PANTHER); IPR016035 (SUPERFAMILY); IPR016036 (SUPERFAMILY)	F:GO:0003824; P:GO:0008152	F:catalytic activity; P:metabolic process
HY10025_c0_g1_i10	malonyl-CoA-acyl carrier protein transacylase, mitochondrial	1459	20	1.08199e-119	84.65	3	F:GO:0004314; C:GO:0005737; P:GO:0006633	F:[acyl-carrier-protein] S-malonyltransferase activity; C:cytoplasm; P:fatty acid biosynthetic process	EC:2.3.1.85; EC:2.3.1.39	Fatty-acid synthase; [Acyl-carrier-protein] S-malonyltransferase	IPR016036 (G3DSA:3.30.70.GENE3D); PTHR42681 (PANTHER); IPR016036 (SUPERFAMILY)	F:GO:0003824; P:GO:0008152	F:catalytic activity; P:metabolic process
HY10025_c0_g1_i11	---NA---	220									no IPS match	no IPS match	no IPS match
HY10025_c0_g1_i12	malonyl-CoA-acyl carrier protein transacylase, mitochondrial	3328	20	3.84423e-113	84.95	3	F:GO:0004314; C:GO:0005737; P:GO:0006633	F:[acyl-carrier-protein] S-malonyltransferase activity; C:cytoplasm; P:fatty acid biosynthetic process	EC:2.3.1.85; EC:2.3.1.39	Fatty-acid synthase; [Acyl-carrier-protein] S-malonyltransferase	IPR016036 (G3DSA:3.30.70.GENE3D); PTHR42681 (PANTHER); IPR016036 (SUPERFAMILY)	F:GO:0003824; P:GO:0008152	F:catalytic activity; P:metabolic process
HY10025_c0_g1_i13	malonyl-CoA-acyl carrier protein transacylase, mitochondrial	1703	20	2.58106e-124	95.6	3	F:GO:0004314; C:GO:0005737; P:GO:0006633	F:[acyl-carrier-protein] S-malonyltransferase activity; C:cytoplasm; P:fatty acid biosynthetic process	EC:2.3.1.85; EC:2.3.1.39	Fatty-acid synthase; [Acyl-carrier-protein] S-malonyltransferase	IPR016036 (G3DSA:3.30.70.GENE3D); G3DSA:3.40.366.10 (GENE3D); G3DSA:3.40.366.10 (GENE3D); PTHR42681 (PANTHER); IPR016036 (SUPERFAMILY); IPR016035 (SUPERFAMILY)	F:GO:0003824; P:GO:0008152	F:catalytic activity; P:metabolic process
HY10025_c0_g1_i14	malonyl CoA-acyl carrier protein transacylase	1473	20	0	85.5	3	F:GO:0004314; C:GO:0005737; P:GO:0006633	F:[acyl-carrier-protein] S-malonyltransferase activity; C:cytoplasm; P:fatty acid biosynthetic process	EC:2.3.1.85; EC:2.3.1.39	Fatty-acid synthase; [Acyl-carrier-protein] S-malonyltransferase	IPR024925 (PIRSF); G3DSA:3.40.366.10 (GENE3D); G3DSA:3.40.366.10 (GENE3D); IPR014043 (PFAM); IPR016036 (G3DSA:3.30.70.GENE3D); IPR004410 (TIGRFAM); PTHR42681 (PANTHER); PTHR42681:SF1 (PANTHER); IPR016036 (SUPERFAMILY); IPR016035 (SUPERFAMILY)	F:GO:0003824; F:GO:0004314; P:GO:0008152	F:catalytic activity; F:[acyl-carrier-protein] S-malonyltransferase activity; P:metabolic process
HY10025_c0_g1_i15	malonyl CoA-acyl carrier protein transacylase	1242	20	2.46777e-101	69.1	2	F:GO:0003824; P:GO:0008152	F:catalytic activity; P:metabolic process			G3DSA:3.40.366.10 (GENE3D); PTHR42681 (PANTHER); PTHR42681:SF1 (PANTHER); IPR016035 (SUPERFAMILY)	P:GO:0008152	P:metabolic process
HY10025_c0_g1_i16	malonyl-CoA-acyl carrier protein transacylase, mitochondrial	1884	20	1.63739e-123	95.6	3	F:GO:0004314; C:GO:0005737; P:GO:0006633	F:[acyl-carrier-protein] S-malonyltransferase activity; C:cytoplasm; P:fatty acid biosynthetic process	EC:2.3.1.85; EC:2.3.1.39	Fatty-acid synthase; [Acyl-carrier-protein] S-malonyltransferase	G3DSA:3.40.366.10 (GENE3D); IPR016036 (G3DSA:3.30.70.GENE3D); G3DSA:3.40.366.10 (GENE3D); PTHR42681 (PANTHER); IPR016036 (SUPERFAMILY); IPR016035 (SUPERFAMILY)	F:GO:0003824; P:GO:0008152	F:catalytic activity; P:metabolic process
HY10025_c0_g1_i17	malonyl CoA-acyl carrier protein transacylase	2940	20	0	95.45	2	F:GO:0004314; P:GO:0008152	F:[acyl-carrier-protein] S-malonyltransferase activity; P:metabolic process	EC:2.3.1.85; EC:2.3.1.39	Fatty-acid synthase; [Acyl-carrier-protein] S-malonyltransferase	IPR004410 (TIGRFAM); G3DSA:3.40.366.10 (GENE3D); IPR016036 (G3DSA:3.30.70.GENE3D); IPR014043 (PFAM); IPR024925 (PIRSF); G3DSA:3.40.366.10 (GENE3D); PTHR42681 (PANTHER); IPR016035 (SUPERFAMILY); IPR016036 (SUPERFAMILY)	F:GO:0003824; F:GO:0004314; P:GO:0008152	F:catalytic activity; F:[acyl-carrier-protein] S-malonyltransferase activity; P:metabolic process
HY10025_c0_g1_i18	malonyl CoA-acyl carrier protein transacylase	2912	20	0	95.45	2	F:GO:0004314; P:GO:0008152	F:[acyl-carrier-protein] S-malonyltransferase activity; P:metabolic process	EC:2.3.1.85; EC:2.3.1.39	Fatty-acid synthase; [Acyl-carrier-protein] S-malonyltransferase	IPR004410 (TIGRFAM); G3DSA:3.40.366.10 (GENE3D); IPR016036 (G3DSA:3.30.70.GENE3D); IPR014043 (PFAM); IPR024925 (PIRSF); G3DSA:3.40.366.10 (GENE3D); PTHR42681 (PANTHER); IPR016035 (SUPERFAMILY); IPR016036 (SUPERFAMILY)	F:GO:0003824; F:GO:0004314; P:GO:0008152	F:catalytic activity; F:[acyl-carrier-protein] S-malonyltransferase activity; P:metabolic process
HY10025_c0_g1_i2	malonyl-CoA-acyl carrier protein transacylase, mitochondrial	3253	20	1.18572e-118	95.6	3	F:GO:0004314; C:GO:0005737; P:GO:0006633	F:[acyl-carrier-protein] S-malonyltransferase activity; C:cytoplasm; P:fatty acid biosynthetic process	EC:2.3.1.85; EC:2.3.1.39	Fatty-acid synthase; [Acyl-carrier-protein] S-malonyltransferase	IPR016036 (G3DSA:3.30.70.GENE3D); G3DSA:3.40.366.10 (GENE3D); G3DSA:3.40.366.10 (GENE3D); PTHR42681 (PANTHER); IPR016036 (SUPERFAMILY); IPR016035 (SUPERFAMILY)	F:GO:0003824; P:GO:0008152	F:catalytic activity; P:metabolic process
HY10025_c0_g1_i3	malonyl-CoA-acyl carrier protein transacylase, mitochondrial	1959	20	1.00471e-117	84.95	3	F:GO:0004314; C:GO:0005737; P:GO:0006633	F:[acyl-carrier-protein] S-malonyltransferase activity; C:cytoplasm; P:fatty acid biosynthetic process	EC:2.3.1.85; EC:2.3.1.39	Fatty-acid synthase; [Acyl-carrier-protein] S-malonyltransferase	IPR016036 (G3DSA:3.30.70.GENE3D); PTHR42681 (PANTHER); IPR016036 (SUPERFAMILY)	F:GO:0003824; P:GO:0008152	F:catalytic activity; P:metabolic process
HY10025_c0_g1_i4	malonyl-CoA-acyl carrier protein transacylase, mitochondrial	3356	20	4.57413e-113	84.95	3	F:GO:0004314; C:GO:0005737; P:GO:0006633	F:[acyl-carrier-protein] S-malonyltransferase activity; C:cytoplasm; P:fatty acid biosynthetic process	EC:2.3.1.85; EC:2.3.1.39	Fatty-acid synthase; [Acyl-carrier-protein] S-malonyltransferase	no IPS match	no IPS match	no IPS match
HY10025_c0_g1_i5	malonyl-CoA-acyl carrier protein transacylase, mitochondrial	1134	20	1.51066e-108	80	3	F:GO:0004314; C:GO:0005737; P:GO:0006633	F:[acyl-carrier-protein] S-malonyltransferase activity; C:cytoplasm; P:fatty acid biosynthetic process	EC:2.3.1.85; EC:2.3.1.39	Fatty-acid synthase; [Acyl-carrier-protein] S-malonyltransferase	G3DSA:3.40.366.10 (GENE3D); PTHR42681 (PANTHER); PTHR42681:SF1 (PANTHER); IPR016035 (SUPERFAMILY)	P:GO:0008152	P:metabolic process
HY10025_c0_g1_i6	malonyl-CoA-acyl carrier protein transacylase, mitochondrial	3281	20	1.4333e-118	95.6	3	F:GO:0004314; C:GO:0005737; P:GO:0006633	F:[acyl-carrier-protein] S-malonyltransferase activity; C:cytoplasm; P:fatty acid biosynthetic process	EC:2.3.1.85; EC:2.3.1.39	Fatty-acid synthase; [Acyl-carrier-protein] S-malonyltransferase	IPR016036 (G3DSA:3.30.70.GENE3D); G3DSA:3.40.366.10 (GENE3D); G3DSA:3.40.366.10 (GENE3D); PTHR42681 (PANTHER); IPR016036 (SUPERFAMILY); IPR016035 (SUPERFAMILY)	F:GO:0003824; P:GO:0008152	F:catalytic activity; P:metabolic process
HY10025_c0_g1_i7	malonyl CoA-acyl carrier protein transacylase	629	20	5.77016e-14	91.7	2	F:GO:0004314; P:GO:0008152	F:[acyl-carrier-protein] S-malonyltransferase activity; P:metabolic process	EC:2.3.1.85; EC:2.3.1.39	Fatty-acid synthase; [Acyl-carrier-protein] S-malonyltransferase	G3DSA:3.40.366.10 (GENE3D); IPR016035 (SUPERFAMILY)	P:GO:0008152	P:metabolic process
HY10025_c0_g1_i8	---NA---	412									no IPS match	no IPS match	no IPS match
HY10025_c0_g1_i9	malonyl CoA-acyl carrier protein transacylase	728	20	1.59619e-08	57.05	1	P:GO:0008152	P:metabolic process			G3DSA:3.40.366.10 (GENE3D); IPR016035 (SUPERFAMILY)	P:GO:0008152	P:metabolic process
HY10026_c0_g1_i1	trafficking protein particle complex subunit 1-like	1935	20	6.65622e-17	79.85	3	C:GO:0005829; P:GO:0016192; C:GO:0030008	C:cytosol; P:vesicle-mediated transport; C:TRAPP complex			IPR007233 (PFAM); G3DSA:3.30.450.70 (GENE3D); IPR011012 (SUPERFAMILY)	P:GO:0016192; C:GO:0030008	P:vesicle-mediated transport; C:TRAPP complex
HY10026_c0_g1_i2	trafficking protein particle complex subunit 1-like	1751	20	5.94778e-17	79.85	3	C:GO:0005829; P:GO:0016192; C:GO:0030008	C:cytosol; P:vesicle-mediated transport; C:TRAPP complex			IPR007233 (PFAM); G3DSA:3.30.450.70 (GENE3D); IPR011012 (SUPERFAMILY)	P:GO:0016192; C:GO:0030008	P:vesicle-mediated transport; C:TRAPP complex
HY10026_c0_g1_i3	trafficking protein particle complex subunit 1	267	20	4.05379e-11	58.65	2	P:GO:0016192; C:GO:0030008	P:vesicle-mediated transport; C:TRAPP complex			mobidb-lite (MOBIDB_LITE)	no GO terms	no GO terms
HY10026_c0_g1_i4	trafficking protein particle complex subunit 1-like	763	20	1.3128e-37	73	2	P:GO:0016192; C:GO:0030008	P:vesicle-mediated transport; C:TRAPP complex			G3DSA:3.30.450.70 (GENE3D); IPR007233 (PFAM); IPR011012 (SUPERFAMILY)	P:GO:0016192; C:GO:0030008	P:vesicle-mediated transport; C:TRAPP complex
HY10026_c1_g1_i1	hypothetical protein CICLE_v10022179mg	1425	20	3.19466e-137	68.95						mobidb-lite (MOBIDB_LITE); PTHR34539 (PANTHER); PTHR34539:SF2 (PANTHER)	no GO terms	no GO terms
HY10026_c1_g1_i2	hypothetical protein CICLE_v10022179mg	1510	20	8.31579e-137	68.95						mobidb-lite (MOBIDB_LITE); PTHR34539 (PANTHER); PTHR34539:SF2 (PANTHER)	no GO terms	no GO terms
HY10026_c1_g1_i3	hypothetical protein CICLE_v10022179mg	1639	20	3.48952e-136	68.95						mobidb-lite (MOBIDB_LITE); PTHR34539 (PANTHER); PTHR34539:SF2 (PANTHER)	no GO terms	no GO terms
HY10026_c1_g1_i4	---NA---	488									no IPS match	no IPS match	no IPS match
HY10026_c1_g2_i1	basic leucine zipper 43-like	2094	20	8.12049e-91	76.65	3	F:GO:0003677; F:GO:0003700; P:GO:0006355	F:DNA binding; F:DNA binding transcription factor activity; P:regulation of transcription, DNA-templated			IPR008917 (G3DSA:1.10.880.GENE3D); IPR004827 (PFAM); G3DSA:1.20.5.170 (GENE3D); mobidb-lite (MOBIDB_LITE); PTHR22952 (PANTHER); PTHR22952:SF362 (PANTHER); IPR004827 (PROSITE_PROFILES); cd14702 (CDD); SSF57959 (SUPERFAMILY)	F:GO:0003677; F:GO:0003700; P:GO:0006355	F:DNA binding; F:DNA binding transcription factor activity; P:regulation of transcription, DNA-templated
HY10026_c1_g2_i2	basic leucine zipper 43-like	2082	20	1.3171e-90	76.65	3	F:GO:0003677; F:GO:0003700; P:GO:0006355	F:DNA binding; F:DNA binding transcription factor activity; P:regulation of transcription, DNA-templated			IPR008917 (G3DSA:1.10.880.GENE3D); IPR004827 (PFAM); G3DSA:1.20.5.170 (GENE3D); mobidb-lite (MOBIDB_LITE); PTHR22952 (PANTHER); PTHR22952:SF362 (PANTHER); IPR004827 (PROSITE_PROFILES); cd14702 (CDD); SSF57959 (SUPERFAMILY)	F:GO:0003677; F:GO:0003700; P:GO:0006355	F:DNA binding; F:DNA binding transcription factor activity; P:regulation of transcription, DNA-templated
HY10026_c1_g3_i1	mitogen-activated protein kinase kinase kinase NPK1	1114	20	0	78.9	9	F:GO:0004674; F:GO:0005524; C:GO:0005737; P:GO:0007346; C:GO:0016020; P:GO:0023014; P:GO:0031098; P:GO:0032147; P:GO:0042981	F:protein serine/threonine kinase activity; F:ATP binding; C:cytoplasm; P:regulation of mitotic cell cycle; C:membrane; P:signal transduction by protein phosphorylation; P:stress-activated protein kinase signaling cascade; P:activation of protein kinase activity; P:regulation of apoptotic process	EC:2.7.11	Transferring phosphorus-containing groups	IPR000719 (PFAM); G3DSA:1.10.510.10 (GENE3D); G3DSA:3.30.200.20 (GENE3D); PTHR24361:SF390 (PANTHER); PTHR24361 (PANTHER); IPR000719 (PROSITE_PROFILES); cd06606 (CDD); IPR011009 (SUPERFAMILY)	F:GO:0004672; F:GO:0005524; P:GO:0006468	F:protein kinase activity; F:ATP binding; P:protein phosphorylation
HY10026_c1_g3_i2	mitogen-activated protein kinase kinase kinase NPK1	2862	20	0	74.95	9	F:GO:0004674; F:GO:0005524; C:GO:0005737; P:GO:0007346; C:GO:0016020; P:GO:0023014; P:GO:0031098; P:GO:0032147; P:GO:0042981	F:protein serine/threonine kinase activity; F:ATP binding; C:cytoplasm; P:regulation of mitotic cell cycle; C:membrane; P:signal transduction by protein phosphorylation; P:stress-activated protein kinase signaling cascade; P:activation of protein kinase activity; P:regulation of apoptotic process	EC:2.7.11	Transferring phosphorus-containing groups	G3DSA:1.10.510.10 (GENE3D); IPR000719 (PFAM); G3DSA:3.30.200.20 (GENE3D); PTHR24361 (PANTHER); PTHR24361:SF390 (PANTHER); IPR000719 (PROSITE_PROFILES); cd06606 (CDD); IPR011009 (SUPERFAMILY)	F:GO:0004672; F:GO:0005524; P:GO:0006468	F:protein kinase activity; F:ATP binding; P:protein phosphorylation
HY10026_c1_g3_i3	mitogen-activated protein kinase kinase kinase ANP1-like	249	19	3.58316e-19	88.63	4	F:GO:0004674; F:GO:0005524; P:GO:0006468; C:GO:0016021	F:protein serine/threonine kinase activity; F:ATP binding; P:protein phosphorylation; C:integral component of membrane	EC:2.7.11	Transferring phosphorus-containing groups	G3DSA:3.30.200.20 (GENE3D); PTHR24361 (PANTHER); PTHR24361:SF390 (PANTHER); IPR000719 (PROSITE_PROFILES); IPR011009 (SUPERFAMILY)	F:GO:0004672; F:GO:0005524; P:GO:0006468	F:protein kinase activity; F:ATP binding; P:protein phosphorylation
HY10026_c1_g3_i4	mitogen-activated protein kinase kinase kinase NPK1	1789	20	0	79.1	9	F:GO:0004674; F:GO:0005524; C:GO:0005737; P:GO:0007346; C:GO:0016020; P:GO:0023014; P:GO:0031098; P:GO:0032147; P:GO:0042981	F:protein serine/threonine kinase activity; F:ATP binding; C:cytoplasm; P:regulation of mitotic cell cycle; C:membrane; P:signal transduction by protein phosphorylation; P:stress-activated protein kinase signaling cascade; P:activation of protein kinase activity; P:regulation of apoptotic process	EC:2.7.11	Transferring phosphorus-containing groups	G3DSA:1.10.510.10 (GENE3D); IPR000719 (PFAM); PIRSF000654 (PIRSF); G3DSA:3.30.200.20 (GENE3D); PTHR24361 (PANTHER); PTHR24361:SF390 (PANTHER); IPR000719 (PROSITE_PROFILES); cd06606 (CDD); IPR011009 (SUPERFAMILY)	F:GO:0004672; F:GO:0005524; P:GO:0006468	F:protein kinase activity; F:ATP binding; P:protein phosphorylation
HY10026_c1_g3_i5	mitogen-activated protein kinase kinase kinase 2-like	708	3	7.46108e-40	98	3	F:GO:0004672; F:GO:0005524; P:GO:0006468	F:protein kinase activity; F:ATP binding; P:protein phosphorylation			no IPS match	no IPS match	no IPS match
HY10026_c1_g3_i6	mitogen-activated protein kinase kinase kinase NPK1	2217	20	0	74.95	9	F:GO:0004674; F:GO:0005524; C:GO:0005737; P:GO:0007346; C:GO:0016020; P:GO:0023014; P:GO:0031098; P:GO:0032147; P:GO:0042981	F:protein serine/threonine kinase activity; F:ATP binding; C:cytoplasm; P:regulation of mitotic cell cycle; C:membrane; P:signal transduction by protein phosphorylation; P:stress-activated protein kinase signaling cascade; P:activation of protein kinase activity; P:regulation of apoptotic process	EC:2.7.11	Transferring phosphorus-containing groups	G3DSA:1.10.510.10 (GENE3D); IPR000719 (PFAM); G3DSA:3.30.200.20 (GENE3D); PTHR24361 (PANTHER); PTHR24361:SF390 (PANTHER); IPR000719 (PROSITE_PROFILES); cd06606 (CDD); IPR011009 (SUPERFAMILY)	F:GO:0004672; F:GO:0005524; P:GO:0006468	F:protein kinase activity; F:ATP binding; P:protein phosphorylation
HY10026_c1_g4_i1	---NA---	686									no IPS match	no IPS match	no IPS match
HY10027_c0_g1_i1	aconitate hydratase, cytoplasmic	446	20	8.33338e-31	98.7	3	F:GO:0003994; P:GO:0008152; F:GO:0051539	F:aconitate hydratase activity; P:metabolic process; F:4 iron, 4 sulfur cluster binding	EC:4.2.1.3	Aconitate hydratase	no IPS match	no IPS match	no IPS match
HY10027_c0_g1_i2	aconitate hydratase, cytoplasmic	527	20	1.40894e-25	66.9	5	F:GO:0003994; P:GO:0008152; F:GO:0016829; F:GO:0051536; F:GO:0051539	F:aconitate hydratase activity; P:metabolic process; F:lyase activity; F:iron-sulfur cluster binding; F:4 iron, 4 sulfur cluster binding			no IPS match	no IPS match	no IPS match
HY10027_c0_g1_i3	aconitate hydratase, cytoplasmic	451	20	8.64444e-31	98.7	3	F:GO:0003994; P:GO:0008152; F:GO:0051539	F:aconitate hydratase activity; P:metabolic process; F:4 iron, 4 sulfur cluster binding	EC:4.2.1.3	Aconitate hydratase	no IPS match	no IPS match	no IPS match
HY10027_c0_g2_i1	aconitate hydratase, cytoplasmic-like	283	20	9.43257e-57	96.2	3	F:GO:0003994; P:GO:0008152; F:GO:0051539	F:aconitate hydratase activity; P:metabolic process; F:4 iron, 4 sulfur cluster binding	EC:4.2.1.3	Aconitate hydratase	IPR000573 (PFAM); IPR015928 (G3DSA:3.20.19.GENE3D); PTHR11670:SF50 (PANTHER); IPR006249 (PANTHER); SSF52016 (SUPERFAMILY)	P:GO:0008152	P:metabolic process
HY10027_c1_g1_i1	protein SAWADEE HOMEODOMAIN HOMOLOG 2	1137	20	6.64854e-75	87.45	4	F:GO:0003677; F:GO:0003682; C:GO:0005634; C:GO:0016020	F:DNA binding; F:chromatin binding; C:nucleus; C:membrane			G3DSA:1.10.10.60 (GENE3D); IPR001356 (PFAM); mobidb-lite (MOBIDB_LITE); PTHR33827:SF3 (PANTHER); PTHR33827 (PANTHER); IPR001356 (PROSITE_PROFILES); IPR001356 (CDD); IPR009057 (SUPERFAMILY)	F:GO:0003677	F:DNA binding
HY10027_c1_g1_i2	protein SAWADEE HOMEODOMAIN HOMOLOG 2-like isoform X1	2679	20	5.71093e-147	88.7	3	F:GO:0003677; F:GO:0003682; C:GO:0005634	F:DNA binding; F:chromatin binding; C:nucleus			IPR032001 (PFAM); G3DSA:1.10.10.60 (GENE3D); G3DSA:2.40.50.40 (GENE3D); PTHR33827:SF3 (PANTHER); PTHR33827 (PANTHER); IPR001356 (PROSITE_PROFILES); IPR001356 (CDD); IPR009057 (SUPERFAMILY)	F:GO:0003677; F:GO:0003682	F:DNA binding; F:chromatin binding
HY10027_c1_g1_i3	protein SAWADEE HOMEODOMAIN HOMOLOG 2	2727	20	4.29417e-161	87.75	4	F:GO:0003677; F:GO:0003682; C:GO:0005634; C:GO:0016021	F:DNA binding; F:chromatin binding; C:nucleus; C:integral component of membrane			IPR001356 (PFAM); G3DSA:2.40.50.40 (GENE3D); IPR032001 (PFAM); G3DSA:1.10.10.60 (GENE3D); PTHR33827:SF3 (PANTHER); PTHR33827 (PANTHER); IPR001356 (PROSITE_PROFILES); IPR001356 (CDD); IPR009057 (SUPERFAMILY)	F:GO:0003677; F:GO:0003682	F:DNA binding; F:chromatin binding
HY10027_c1_g1_i4	protein SAWADEE HOMEODOMAIN HOMOLOG 2 isoform X2	1635	20	0	84.1	3	F:GO:0003677; F:GO:0003682; C:GO:0005634	F:DNA binding; F:chromatin binding; C:nucleus			G3DSA:2.30.30.140 (GENE3D); IPR001356 (PFAM); IPR032001 (PFAM); G3DSA:1.10.10.60 (GENE3D); G3DSA:2.40.50.40 (GENE3D); mobidb-lite (MOBIDB_LITE); PTHR33827:SF3 (PANTHER); PTHR33827 (PANTHER); IPR001356 (PROSITE_PROFILES); IPR001356 (CDD); IPR009057 (SUPERFAMILY)	F:GO:0003677; F:GO:0003682	F:DNA binding; F:chromatin binding
HY10027_c1_g1_i5	protein SAWADEE HOMEODOMAIN HOMOLOG 2	2727	20	4.29417e-161	87.75	4	F:GO:0003677; F:GO:0003682; C:GO:0005634; C:GO:0016021	F:DNA binding; F:chromatin binding; C:nucleus; C:integral component of membrane			IPR001356 (PFAM); G3DSA:2.40.50.40 (GENE3D); IPR032001 (PFAM); G3DSA:1.10.10.60 (GENE3D); PTHR33827:SF3 (PANTHER); PTHR33827 (PANTHER); IPR001356 (PROSITE_PROFILES); IPR001356 (CDD); IPR009057 (SUPERFAMILY)	F:GO:0003677; F:GO:0003682	F:DNA binding; F:chromatin binding
HY10027_c1_g1_i6	protein SAWADEE HOMEODOMAIN HOMOLOG 2 isoform X2	1635	20	0	84.1	3	F:GO:0003677; F:GO:0003682; C:GO:0005634	F:DNA binding; F:chromatin binding; C:nucleus			G3DSA:2.30.30.140 (GENE3D); IPR001356 (PFAM); IPR032001 (PFAM); G3DSA:1.10.10.60 (GENE3D); G3DSA:2.40.50.40 (GENE3D); mobidb-lite (MOBIDB_LITE); PTHR33827:SF3 (PANTHER); PTHR33827 (PANTHER); IPR001356 (PROSITE_PROFILES); IPR001356 (CDD); IPR009057 (SUPERFAMILY)	F:GO:0003677; F:GO:0003682	F:DNA binding; F:chromatin binding
HY10027_c1_g1_i7	protein SAWADEE HOMEODOMAIN HOMOLOG 2	3570	20	6.8463e-87	83.65	4	F:GO:0003677; F:GO:0003682; C:GO:0005634; C:GO:0016020	F:DNA binding; F:chromatin binding; C:nucleus; C:membrane			IPR001356 (PFAM); G3DSA:1.10.10.60 (GENE3D); mobidb-lite (MOBIDB_LITE); PTHR33827 (PANTHER); PTHR33827:SF3 (PANTHER); IPR001356 (PROSITE_PROFILES); IPR001356 (CDD); IPR009057 (SUPERFAMILY)	F:GO:0003677	F:DNA binding
HY10027_c1_g1_i8	protein SAWADEE HOMEODOMAIN HOMOLOG 2	3570	20	6.8463e-87	83.65	4	F:GO:0003677; F:GO:0003682; C:GO:0005634; C:GO:0016020	F:DNA binding; F:chromatin binding; C:nucleus; C:membrane			IPR001356 (PFAM); G3DSA:1.10.10.60 (GENE3D); mobidb-lite (MOBIDB_LITE); PTHR33827 (PANTHER); PTHR33827:SF3 (PANTHER); IPR001356 (PROSITE_PROFILES); IPR001356 (CDD); IPR009057 (SUPERFAMILY)	F:GO:0003677	F:DNA binding
HY10027_c1_g2_i1	---NA---	264									no IPS match	no IPS match	no IPS match
HY10027_c2_g1_i1	nuclear speckle splicing regulatory protein 1-like	2018	20	0	75.5						IPR018612 (PFAM); mobidb-lite (MOBIDB_LITE); mobidb-lite (MOBIDB_LITE); PTHR30060:SF0 (PANTHER); PTHR30060 (PANTHER)	no GO terms	no GO terms
HY10027_c2_g1_i2	nuclear speckle splicing regulatory protein 1-like	2010	20	0	75.5						IPR018612 (PFAM); mobidb-lite (MOBIDB_LITE); mobidb-lite (MOBIDB_LITE); PTHR30060:SF0 (PANTHER); PTHR30060 (PANTHER)	no GO terms	no GO terms
HY10027_c2_g1_i3	nuclear speckle splicing regulatory protein 1-like	2417	20	1.04574e-78	70.15						mobidb-lite (MOBIDB_LITE); PTHR30060:SF0 (PANTHER); PTHR30060 (PANTHER)	no GO terms	no GO terms
HY10027_c2_g1_i4	nuclear speckle splicing regulatory protein 1-like	2127	20	1.76058e-150	75.15						IPR018612 (PFAM); mobidb-lite (MOBIDB_LITE); PTHR30060:SF0 (PANTHER); PTHR30060 (PANTHER)	no GO terms	no GO terms
HY10027_c2_g1_i5	nuclear speckle splicing regulatory protein 1-like	2119	20	1.60572e-150	75.15						IPR018612 (PFAM); mobidb-lite (MOBIDB_LITE); PTHR30060:SF0 (PANTHER); PTHR30060 (PANTHER)	no GO terms	no GO terms
HY10027_c2_g1_i6	---NA---	302									no IPS match	no IPS match	no IPS match
HY10027_c3_g1_i1	CSC1-like protein ERD4	1679	20	6.10525e-55	96.35	1	C:GO:0016021	C:integral component of membrane			IPR032880 (PFAM); PTHR13018 (PANTHER); PTHR13018:SF22 (PANTHER)	no GO terms	no GO terms
HY10027_c3_g1_i10	CSC1-like protein ERD4	3961	20	0	91.2	1	C:GO:0016021	C:integral component of membrane			IPR032880 (PFAM); IPR003864 (PFAM); IPR027815 (PFAM); PTHR13018:SF22 (PANTHER); PTHR13018 (PANTHER)	C:GO:0016020	C:membrane
HY10027_c3_g1_i11	LEAF RUST 10 DISEASE-RESISTANCE LOCUS RECEPTOR-LIKE PROTEIN KINASE-like 1.2 isoform X2	1109	20	1.0118e-73	58.8	3	F:GO:0004672; F:GO:0005524; P:GO:0006468	F:protein kinase activity; F:ATP binding; P:protein phosphorylation			no IPS match	no IPS match	no IPS match
HY10027_c3_g1_i12	CSC1-like protein ERD4	1628	20	4.40699e-55	96.35	1	C:GO:0016021	C:integral component of membrane			IPR032880 (PFAM); PTHR13018 (PANTHER); PTHR13018:SF22 (PANTHER)	no GO terms	no GO terms
HY10027_c3_g1_i13	LEAF RUST 10 DISEASE-RESISTANCE LOCUS RECEPTOR-LIKE PROTEIN KINASE-like 1.2 isoform X2	1158	20	2.69205e-74	58.8	3	F:GO:0004672; F:GO:0005524; P:GO:0006468	F:protein kinase activity; F:ATP binding; P:protein phosphorylation			no IPS match	no IPS match	no IPS match
HY10027_c3_g1_i14	CSC1-like protein ERD4	1630	20	4.49398e-55	96.35	1	C:GO:0016021	C:integral component of membrane			IPR032880 (PFAM); PTHR13018 (PANTHER); PTHR13018:SF22 (PANTHER)	no GO terms	no GO terms
HY10027_c3_g1_i15	CSC1-like protein ERD4	3959	20	0	91.2	1	C:GO:0016021	C:integral component of membrane			IPR032880 (PFAM); IPR003864 (PFAM); IPR027815 (PFAM); PTHR13018:SF22 (PANTHER); PTHR13018 (PANTHER)	C:GO:0016020	C:membrane
HY10027_c3_g1_i16	CSC1-like protein ERD4	4064	20	0	92.55	1	C:GO:0016021	C:integral component of membrane			IPR003864 (PFAM); IPR027815 (PFAM); IPR032880 (PFAM); PTHR13018:SF22 (PANTHER); PTHR13018 (PANTHER)	C:GO:0016020	C:membrane
HY10027_c3_g1_i17	CSC1-like protein ERD4	4152	20	0	91.55	1	C:GO:0016021	C:integral component of membrane			IPR003864 (PFAM); IPR027815 (PFAM); PTHR13018:SF22 (PANTHER); PTHR13018 (PANTHER)	C:GO:0016020	C:membrane
HY10027_c3_g1_i2	CSC1-like protein ERD4	2643	20	0	91.5	1	C:GO:0016021	C:integral component of membrane			IPR032880 (PFAM); IPR027815 (PFAM); IPR003864 (PFAM); PTHR13018 (PANTHER); PTHR13018:SF22 (PANTHER)	C:GO:0016020	C:membrane
HY10027_c3_g1_i3	CSC1-like protein ERD4	3241	20	0	91.2	1	C:GO:0016021	C:integral component of membrane			IPR003864 (PFAM); IPR032880 (PFAM); IPR027815 (PFAM); PTHR13018:SF22 (PANTHER); PTHR13018 (PANTHER)	C:GO:0016020	C:membrane
HY10027_c3_g1_i4	CSC1-like protein ERD4	3243	20	0	91.2	1	C:GO:0016021	C:integral component of membrane			IPR003864 (PFAM); IPR032880 (PFAM); IPR027815 (PFAM); PTHR13018:SF22 (PANTHER); PTHR13018 (PANTHER)	C:GO:0016020	C:membrane
HY10027_c3_g1_i5	CSC1-like protein ERD4	2641	20	0	91.5	1	C:GO:0016021	C:integral component of membrane			IPR032880 (PFAM); IPR027815 (PFAM); IPR003864 (PFAM); PTHR13018 (PANTHER); PTHR13018:SF22 (PANTHER)	C:GO:0016020	C:membrane
HY10027_c3_g1_i6	CSC1-like protein ERD4	3140	20	0	90.95	1	C:GO:0016021	C:integral component of membrane			IPR003864 (PFAM); IPR032880 (PFAM); IPR027815 (PFAM); PTHR13018 (PANTHER); PTHR13018:SF22 (PANTHER)	C:GO:0016020	C:membrane
HY10027_c3_g1_i7	CSC1-like protein ERD4	3138	20	0	90.95	1	C:GO:0016021	C:integral component of membrane			IPR003864 (PFAM); IPR032880 (PFAM); IPR027815 (PFAM); PTHR13018 (PANTHER); PTHR13018:SF22 (PANTHER)	C:GO:0016020	C:membrane
HY10027_c3_g1_i8	CSC1-like protein ERD4	2600	20	0	93.7	1	C:GO:0016021	C:integral component of membrane			IPR027815 (PFAM); IPR003864 (PFAM); PTHR13018 (PANTHER); PTHR13018:SF22 (PANTHER)	C:GO:0016020	C:membrane
HY10027_c3_g1_i9	CSC1-like protein ERD4	1677	20	5.99154e-55	96.35	1	C:GO:0016021	C:integral component of membrane			IPR032880 (PFAM); PTHR13018 (PANTHER); PTHR13018:SF22 (PANTHER)	no GO terms	no GO terms
HY10027_c3_g2_i1	CSC1-like protein ERD4	433	20	5.69346e-16	97	1	C:GO:0016021	C:integral component of membrane			mobidb-lite (MOBIDB_LITE)	no GO terms	no GO terms
HY10028_c0_g1_i1	asparagine synthetase [glutamine-hydrolyzing] 2	273	20	4.91547e-13	97.95	4	F:GO:0004066; F:GO:0005524; P:GO:0006529; P:GO:0006541	F:asparagine synthase (glutamine-hydrolyzing) activity; F:ATP binding; P:asparagine biosynthetic process; P:glutamine metabolic process	EC:6.3.5.4	Asparagine synthase (glutamine-hydrolyzing)	no IPS match	no IPS match	no IPS match
HY10028_c0_g1_i2	asparagine synthetase [glutamine-hydrolyzing] 2	1830	20	0	97.25	4	F:GO:0004066; F:GO:0005524; P:GO:0006529; P:GO:0006541	F:asparagine synthase (glutamine-hydrolyzing) activity; F:ATP binding; P:asparagine biosynthetic process; P:glutamine metabolic process	EC:6.3.5.4	Asparagine synthase (glutamine-hydrolyzing)	IPR001962 (PFAM); IPR014729 (G3DSA:3.40.50.GENE3D); IPR029055 (G3DSA:3.60.20.GENE3D); PTHR11772 (PANTHER); PTHR11772:SF13 (PANTHER); IPR001962 (CDD); cd00352 (CDD); IPR029055 (SUPERFAMILY); SSF52402 (SUPERFAMILY)	F:GO:0004066; P:GO:0006529	F:asparagine synthase (glutamine-hydrolyzing) activity; P:asparagine biosynthetic process
HY10028_c0_g1_i3	asparagine synthetase [glutamine-hydrolyzing] 2	1517	20	0	95.3	4	F:GO:0004066; F:GO:0005524; P:GO:0006529; P:GO:0006541	F:asparagine synthase (glutamine-hydrolyzing) activity; F:ATP binding; P:asparagine biosynthetic process; P:glutamine metabolic process	EC:6.3.5.4	Asparagine synthase (glutamine-hydrolyzing)	IPR029055 (G3DSA:3.60.20.GENE3D); IPR001962 (PFAM); IPR014729 (G3DSA:3.40.50.GENE3D); IPR006426 (PIRSF); PTHR11772:SF13 (PANTHER); PTHR11772 (PANTHER); IPR001962 (CDD); cd00352 (CDD); SSF52402 (SUPERFAMILY); IPR029055 (SUPERFAMILY)	F:GO:0004066; P:GO:0006529	F:asparagine synthase (glutamine-hydrolyzing) activity; P:asparagine biosynthetic process
HY10028_c0_g1_i4	asparagine synthetase [glutamine-hydrolyzing] 2	1829	20	0	97.25	4	F:GO:0004066; F:GO:0005524; P:GO:0006529; P:GO:0006541	F:asparagine synthase (glutamine-hydrolyzing) activity; F:ATP binding; P:asparagine biosynthetic process; P:glutamine metabolic process	EC:6.3.5.4	Asparagine synthase (glutamine-hydrolyzing)	IPR001962 (PFAM); IPR014729 (G3DSA:3.40.50.GENE3D); IPR029055 (G3DSA:3.60.20.GENE3D); PTHR11772 (PANTHER); PTHR11772:SF13 (PANTHER); IPR001962 (CDD); cd00352 (CDD); IPR029055 (SUPERFAMILY); SSF52402 (SUPERFAMILY)	F:GO:0004066; P:GO:0006529	F:asparagine synthase (glutamine-hydrolyzing) activity; P:asparagine biosynthetic process
HY10028_c0_g1_i5	asparagine synthetase [glutamine-hydrolyzing] 2	2124	20	0	95.4	4	F:GO:0004066; F:GO:0005524; P:GO:0006529; P:GO:0006541	F:asparagine synthase (glutamine-hydrolyzing) activity; F:ATP binding; P:asparagine biosynthetic process; P:glutamine metabolic process	EC:6.3.5.4	Asparagine synthase (glutamine-hydrolyzing)	IPR006426 (TIGRFAM); IPR001962 (PFAM); IPR029055 (G3DSA:3.60.20.GENE3D); IPR017932 (PFAM); IPR014729 (G3DSA:3.40.50.GENE3D); IPR006426 (PIRSF); PTHR11772:SF13 (PANTHER); PTHR11772 (PANTHER); IPR017932 (PROSITE_PROFILES); IPR001962 (CDD); IPR033738 (CDD); SSF52402 (SUPERFAMILY); IPR029055 (SUPERFAMILY)	F:GO:0004066; P:GO:0006529	F:asparagine synthase (glutamine-hydrolyzing) activity; P:asparagine biosynthetic process
HY10028_c0_g1_i6	asparagine synthetase [glutamine-hydrolyzing] 2	2479	20	0	95.75	4	F:GO:0004066; F:GO:0005524; P:GO:0006529; P:GO:0006541	F:asparagine synthase (glutamine-hydrolyzing) activity; F:ATP binding; P:asparagine biosynthetic process; P:glutamine metabolic process	EC:6.3.5.4	Asparagine synthase (glutamine-hydrolyzing)	IPR001962 (PFAM); IPR014729 (G3DSA:3.40.50.GENE3D); IPR017932 (PFAM); IPR029055 (G3DSA:3.60.20.GENE3D); IPR006426 (PIRSF); PTHR11772 (PANTHER); PTHR11772:SF13 (PANTHER); IPR017932 (PROSITE_PROFILES); IPR001962 (CDD); IPR033738 (CDD); SSF52402 (SUPERFAMILY); IPR029055 (SUPERFAMILY)	F:GO:0004066; P:GO:0006529	F:asparagine synthase (glutamine-hydrolyzing) activity; P:asparagine biosynthetic process
HY10028_c0_g1_i7	---NA---	367									no IPS match	no IPS match	no IPS match
HY10028_c0_g1_i8	asparagine synthetase [glutamine-hydrolyzing] 2	392	20	2.2624e-75	97.25	4	F:GO:0004066; F:GO:0005524; P:GO:0006529; P:GO:0006541	F:asparagine synthase (glutamine-hydrolyzing) activity; F:ATP binding; P:asparagine biosynthetic process; P:glutamine metabolic process	EC:6.3.5.4	Asparagine synthase (glutamine-hydrolyzing)	IPR001962 (PFAM); IPR014729 (G3DSA:3.40.50.GENE3D); PTHR11772 (PANTHER); PTHR11772:SF13 (PANTHER); IPR001962 (CDD); SSF52402 (SUPERFAMILY)	F:GO:0004066; P:GO:0006529	F:asparagine synthase (glutamine-hydrolyzing) activity; P:asparagine biosynthetic process
HY10028_c0_g2_i1	asparagine synthetase [glutamine-hydrolyzing] 2	531	20	5.78261e-23	99.55	4	F:GO:0004066; F:GO:0005524; P:GO:0006529; P:GO:0006541	F:asparagine synthase (glutamine-hydrolyzing) activity; F:ATP binding; P:asparagine biosynthetic process; P:glutamine metabolic process	EC:6.3.5.4	Asparagine synthase (glutamine-hydrolyzing)	IPR029055 (G3DSA:3.60.20.GENE3D); PTHR11772 (PANTHER); PTHR11772:SF13 (PANTHER); cd00352 (CDD); IPR029055 (SUPERFAMILY)	no GO terms	no GO terms
HY10029_c0_g1_i1	oxidoreductase, putative	2219	20	4.11761e-100	84.6	2	F:GO:0016491; P:GO:0055114	F:oxidoreductase activity; P:oxidation-reduction process			G3DSA:3.30.360.10 (GENE3D); PTHR42840:SF5 (PANTHER); PTHR42840 (PANTHER)	no GO terms	no GO terms
HY10029_c0_g1_i10	oxidoreductase, putative	1016	20	1.38919e-138	89.9	2	F:GO:0016491; P:GO:0055114	F:oxidoreductase activity; P:oxidation-reduction process			IPR004104 (PFAM); G3DSA:3.30.360.10 (GENE3D); PTHR42840:SF5 (PANTHER); PTHR42840 (PANTHER); SSF55347 (SUPERFAMILY)	P:GO:0008152; F:GO:0016491; P:GO:0055114	P:metabolic process; F:oxidoreductase activity; P:oxidation-reduction process
HY10029_c0_g1_i11	NAD(P)-binding Rossmann-fold superfamily protein	2770	20	7.31319e-114	90.4	3	C:GO:0005829; F:GO:0016491; P:GO:0055114	C:cytosol; F:oxidoreductase activity; P:oxidation-reduction process			IPR000683 (PFAM); G3DSA:3.40.50.720 (GENE3D); G3DSA:3.30.360.10 (GENE3D); PTHR42840 (PANTHER); PTHR42840:SF5 (PANTHER); SSF55347 (SUPERFAMILY); IPR036291 (SUPERFAMILY)	F:GO:0016491	F:oxidoreductase activity
HY10029_c0_g1_i12	oxidoreductase, putative	419	20	1.43998e-40	86.65	2	F:GO:0016491; P:GO:0055114	F:oxidoreductase activity; P:oxidation-reduction process			no IPS match	no IPS match	no IPS match
HY10029_c0_g1_i2	cinnamyl alcohol dehydrogenase	292	20	2.63647e-12	98.4	5	F:GO:0008270; P:GO:0009809; F:GO:0045551; F:GO:0052747; P:GO:0055114	F:zinc ion binding; P:lignin biosynthetic process; F:cinnamyl-alcohol dehydrogenase activity; F:sinapyl alcohol dehydrogenase activity; P:oxidation-reduction process	EC:1.1.1.195	Cinnamyl-alcohol dehydrogenase	no IPS match	no IPS match	no IPS match
HY10029_c0_g1_i3	oxidoreductase, putative	3738	20	2.69308e-96	84.6	2	F:GO:0016491; P:GO:0055114	F:oxidoreductase activity; P:oxidation-reduction process			G3DSA:3.30.360.10 (GENE3D); PTHR42840:SF5 (PANTHER); PTHR42840 (PANTHER)	no GO terms	no GO terms
HY10029_c0_g1_i4	oxidoreductase, putative	1044	20	5.41769e-106	86.95	2	F:GO:0016491; P:GO:0055114	F:oxidoreductase activity; P:oxidation-reduction process			G3DSA:3.30.360.10 (GENE3D); PTHR42840:SF5 (PANTHER); PTHR42840 (PANTHER); SSF55347 (SUPERFAMILY)	no GO terms	no GO terms
HY10029_c0_g1_i5	oxidoreductase, putative	3881	20	4.3676e-96	84.6	2	F:GO:0016491; P:GO:0055114	F:oxidoreductase activity; P:oxidation-reduction process			G3DSA:3.30.360.10 (GENE3D); PTHR42840:SF5 (PANTHER); PTHR42840 (PANTHER)	no GO terms	no GO terms
HY10029_c0_g1_i6	NAD(P)-binding Rossmann-fold superfamily protein	2865	20	1.41485e-113	90.4	3	C:GO:0005829; F:GO:0016491; P:GO:0055114	C:cytosol; F:oxidoreductase activity; P:oxidation-reduction process			IPR000683 (PFAM); G3DSA:3.40.50.720 (GENE3D); G3DSA:3.30.360.10 (GENE3D); PTHR42840 (PANTHER); PTHR42840:SF5 (PANTHER); SSF55347 (SUPERFAMILY); IPR036291 (SUPERFAMILY)	F:GO:0016491	F:oxidoreductase activity
HY10029_c0_g1_i7	NAD(P)-binding Rossmann-fold superfamily protein	2627	20	2.50934e-114	90.4	3	C:GO:0005829; F:GO:0016491; P:GO:0055114	C:cytosol; F:oxidoreductase activity; P:oxidation-reduction process			IPR000683 (PFAM); G3DSA:3.40.50.720 (GENE3D); G3DSA:3.30.360.10 (GENE3D); PTHR42840 (PANTHER); PTHR42840:SF5 (PANTHER); SSF55347 (SUPERFAMILY); IPR036291 (SUPERFAMILY)	F:GO:0016491	F:oxidoreductase activity
HY10029_c0_g1_i8	NAD(P)-binding Rossmann-fold superfamily protein	2722	20	5.04047e-114	90.4	3	C:GO:0005829; F:GO:0016491; P:GO:0055114	C:cytosol; F:oxidoreductase activity; P:oxidation-reduction process			IPR000683 (PFAM); G3DSA:3.40.50.720 (GENE3D); G3DSA:3.30.360.10 (GENE3D); PTHR42840 (PANTHER); PTHR42840:SF5 (PANTHER); SSF55347 (SUPERFAMILY); IPR036291 (SUPERFAMILY)	F:GO:0016491	F:oxidoreductase activity
HY10029_c0_g1_i9	oxidoreductase, putative	2314	20	5.82017e-78	86.95	2	F:GO:0016491; P:GO:0055114	F:oxidoreductase activity; P:oxidation-reduction process			G3DSA:3.30.360.10 (GENE3D); PTHR42840:SF5 (PANTHER); PTHR42840 (PANTHER)	no GO terms	no GO terms
HY10029_c0_g2_i1	oxidoreductase, putative	894	20	1.7497e-35	49.6	4	C:GO:0005829; P:GO:0008152; F:GO:0016491; P:GO:0055114	C:cytosol; P:metabolic process; F:oxidoreductase activity; P:oxidation-reduction process			no IPS match	no IPS match	no IPS match
HY1003_c0_g1_i1	---NA---	469									no IPS match	no IPS match	no IPS match
HY10030_c0_g1_i1	actin-7-like	1031	20	0	98.75	1	F:GO:0005524	F:ATP binding			IPR004000 (PRINTS); IPR004000 (PFAM); G3DSA:3.90.640.10 (GENE3D); G3DSA:3.30.420.40 (GENE3D); G3DSA:3.30.420.40 (GENE3D); G3DSA:3.30.420.40 (GENE3D); IPR004000 (PANTHER); PTHR11937:SF252 (PANTHER); cd00012 (CDD); SSF53067 (SUPERFAMILY)	no GO terms	no GO terms
HY10030_c1_g1_i1	myosin2	667	20	6.05826e-11	67.5	2	F:GO:0000166; F:GO:0003779	F:nucleotide binding; F:actin binding			PTHR13140:SF382 (PANTHER); PTHR13140 (PANTHER)	no GO terms	no GO terms
HY10030_c2_g1_i1	Actin-7	644	20	6.23562e-154	99.1	1	F:GO:0005524	F:ATP binding			IPR004000 (PRINTS); IPR004000 (PFAM); G3DSA:3.30.420.40 (GENE3D); G3DSA:3.30.420.40 (GENE3D); G3DSA:3.90.640.10 (GENE3D); G3DSA:3.30.420.40 (GENE3D); IPR004000 (PANTHER); PTHR11937:SF252 (PANTHER); cd00012 (CDD); SSF53067 (SUPERFAMILY); SSF53067 (SUPERFAMILY)	no GO terms	no GO terms
HY10030_c2_g2_i1	actin-1	721	20	5.91427e-176	99.2	3	F:GO:0005524; C:GO:0005737; C:GO:0005856	F:ATP binding; C:cytoplasm; C:cytoskeleton			IPR004000 (PRINTS); G3DSA:3.30.420.40 (GENE3D); IPR004000 (PFAM); G3DSA:3.90.640.10 (GENE3D); G3DSA:3.30.420.40 (GENE3D); G3DSA:3.30.420.40 (GENE3D); IPR004000 (PANTHER); PTHR11937:SF276 (PANTHER); cd00012 (CDD); SSF53067 (SUPERFAMILY); SSF53067 (SUPERFAMILY)	no GO terms	no GO terms
HY10030_c3_g1_i1	---NA---	267									no IPS match	no IPS match	no IPS match
HY10030_c3_g2_i1	respiratory burst oxidase homolog protein D-like	1298	20	9.17682e-133	92.15	15	F:GO:0004601; F:GO:0005509; C:GO:0005794; C:GO:0005886; P:GO:0007231; P:GO:0009408; P:GO:0009611; C:GO:0016021; F:GO:0016174; P:GO:0033500; P:GO:0043069; P:GO:0050832; P:GO:0055114; P:GO:0072593; P:GO:0098869	F:peroxidase activity; F:calcium ion binding; C:Golgi apparatus; C:plasma membrane; P:osmosensory signaling pathway; P:response to heat; P:response to wounding; C:integral component of membrane; F:NAD(P)H oxidase activity; P:carbohydrate homeostasis; P:negative regulation of programmed cell death; P:defense response to fungus; P:oxidation-reduction process; P:reactive oxygen species metabolic pro…	EC:1.6.3.1; EC:1.11.1.7	NAD(P)H oxidase (H(2)O(2)-forming); Peroxidase	IPR013121 (PFAM); G3DSA:3.40.50.80 (GENE3D); PTHR11972 (PANTHER); PTHR11972:SF64 (PANTHER); SSF52343 (SUPERFAMILY)	F:GO:0016491; P:GO:0055114	F:oxidoreductase activity; P:oxidation-reduction process
HY10030_c3_g2_i2	respiratory burst oxidase homolog protein D-like	3426	20	0	93.3	15	F:GO:0004601; F:GO:0005509; C:GO:0005794; C:GO:0005886; P:GO:0007231; P:GO:0009408; P:GO:0009611; C:GO:0016021; F:GO:0016174; P:GO:0033500; P:GO:0043069; P:GO:0050832; P:GO:0055114; P:GO:0072593; P:GO:0098869	F:peroxidase activity; F:calcium ion binding; C:Golgi apparatus; C:plasma membrane; P:osmosensory signaling pathway; P:response to heat; P:response to wounding; C:integral component of membrane; F:NAD(P)H oxidase activity; P:carbohydrate homeostasis; P:negative regulation of programmed cell death; P:defense response to fungus; P:oxidation-reduction process; P:reactive oxygen species metabolic pro…	EC:1.6.3.1; EC:1.11.1.7	NAD(P)H oxidase (H(2)O(2)-forming); Peroxidase	IPR000778 (PRINTS); G3DSA:1.10.238.10 (GENE3D); G3DSA:3.40.50.80 (GENE3D); IPR013121 (PFAM); IPR013112 (PFAM); IPR013623 (PFAM); G3DSA:1.10.238.10 (GENE3D); G3DSA:2.40.30.10 (GENE3D); IPR013130 (PFAM); PTHR11972 (PANTHER); PTHR11972:SF94 (PANTHER); IPR002048 (PROSITE_PROFILES); IPR017927 (PROSITE_PROFILES); IPR002048 (PROSITE_PROFILES); IPR002048 (CDD); cd06186 (CDD); SSF52343 (SUPERFAMILY); IPR0…	F:GO:0004601; F:GO:0005509; C:GO:0016020; F:GO:0016491; F:GO:0050664; P:GO:0055114	F:peroxidase activity; F:calcium ion binding; C:membrane; F:oxidoreductase activity; F:oxidoreductase activity, acting on NAD(P)H, oxygen as acceptor; P:oxidation-reduction process
HY10030_c3_g2_i3	respiratory burst oxidase homolog protein D-like	3460	20	0	85.4	15	F:GO:0004601; F:GO:0005509; C:GO:0005794; C:GO:0005886; P:GO:0007231; P:GO:0009408; P:GO:0009611; C:GO:0016021; F:GO:0016174; P:GO:0033500; P:GO:0043069; P:GO:0050832; P:GO:0055114; P:GO:0072593; P:GO:0098869	F:peroxidase activity; F:calcium ion binding; C:Golgi apparatus; C:plasma membrane; P:osmosensory signaling pathway; P:response to heat; P:response to wounding; C:integral component of membrane; F:NAD(P)H oxidase activity; P:carbohydrate homeostasis; P:negative regulation of programmed cell death; P:defense response to fungus; P:oxidation-reduction process; P:reactive oxygen species metabolic pro…	EC:1.6.3.1; EC:1.11.1.7	NAD(P)H oxidase (H(2)O(2)-forming); Peroxidase	IPR000778 (PRINTS); G3DSA:1.10.238.10 (GENE3D); IPR013623 (PFAM); G3DSA:2.40.30.10 (GENE3D); IPR013121 (PFAM); G3DSA:3.40.50.80 (GENE3D); IPR013130 (PFAM); IPR013112 (PFAM); G3DSA:1.10.238.10 (GENE3D),SFLDG01169 (SFLD); mobidb-lite (MOBIDB_LITE); PTHR11972 (PANTHER); PTHR11972:SF94 (PANTHER); IPR002048 (PROSITE_PROFILES); IPR017927 (PROSITE_PROFILES); IPR002048 (PROSITE_PROFILES); cd06186 (CDD); …	F:GO:0004601; F:GO:0005509; C:GO:0016020; F:GO:0016491; F:GO:0050664; P:GO:0055114	F:peroxidase activity; F:calcium ion binding; C:membrane; F:oxidoreductase activity; F:oxidoreductase activity, acting on NAD(P)H, oxygen as acceptor; P:oxidation-reduction process
HY10030_c3_g2_i4	respiratory burst oxidase homolog protein D-like	1190	20	0	84.6	15	F:GO:0004601; F:GO:0005509; C:GO:0005794; C:GO:0005886; P:GO:0007231; P:GO:0009408; P:GO:0009611; C:GO:0016021; F:GO:0016174; P:GO:0033500; P:GO:0043069; P:GO:0050832; P:GO:0055114; P:GO:0072593; P:GO:0098869	F:peroxidase activity; F:calcium ion binding; C:Golgi apparatus; C:plasma membrane; P:osmosensory signaling pathway; P:response to heat; P:response to wounding; C:integral component of membrane; F:NAD(P)H oxidase activity; P:carbohydrate homeostasis; P:negative regulation of programmed cell death; P:defense response to fungus; P:oxidation-reduction process; P:reactive oxygen species metabolic pro…	EC:1.6.3.1; EC:1.11.1.7	NAD(P)H oxidase (H(2)O(2)-forming); Peroxidase	G3DSA:1.10.238.10 (GENE3D); G3DSA:1.10.238.10 (GENE3D); IPR013623 (PFAM); mobidb-lite (MOBIDB_LITE); PTHR11972 (PANTHER); PTHR11972:SF94 (PANTHER); IPR002048 (PROSITE_PROFILES); IPR002048 (CDD); IPR011992 (SUPERFAMILY)	F:GO:0004601; F:GO:0005509; F:GO:0050664; P:GO:0055114	F:peroxidase activity; F:calcium ion binding; F:oxidoreductase activity, acting on NAD(P)H, oxygen as acceptor; P:oxidation-reduction process
HY10030_c3_g2_i5	respiratory burst oxidase homolog protein D-like	3301	20	0	90.5	15	F:GO:0004601; F:GO:0005509; C:GO:0005794; C:GO:0005886; P:GO:0007231; P:GO:0009408; P:GO:0009611; C:GO:0016021; F:GO:0016174; P:GO:0033500; P:GO:0043069; P:GO:0050832; P:GO:0055114; P:GO:0072593; P:GO:0098869	F:peroxidase activity; F:calcium ion binding; C:Golgi apparatus; C:plasma membrane; P:osmosensory signaling pathway; P:response to heat; P:response to wounding; C:integral component of membrane; F:NAD(P)H oxidase activity; P:carbohydrate homeostasis; P:negative regulation of programmed cell death; P:defense response to fungus; P:oxidation-reduction process; P:reactive oxygen species metabolic pro…	EC:1.6.3.1; EC:1.11.1.7	NAD(P)H oxidase (H(2)O(2)-forming); Peroxidase	IPR000778 (PRINTS); IPR013130 (PFAM); IPR013121 (PFAM); IPR013112 (PFAM); G3DSA:3.40.50.80 (GENE3D); IPR013623 (PFAM); G3DSA:1.10.238.10 (GENE3D); G3DSA:1.10.238.10 (GENE3D); G3DSA:2.40.30.10 (GENE3D),SFLDG01168 (SFLD),SFLDG01169 (SFLD); mobidb-lite (MOBIDB_LITE); PTHR11972 (PANTHER); PTHR11972:SF94 (PANTHER); IPR002048 (PROSITE_PROFILES); IPR017927 (PROSITE_PROFILES); IPR002048 (PROSITE_PROFILES…	F:GO:0004601; F:GO:0005509; C:GO:0016020; F:GO:0016491; F:GO:0050664; P:GO:0055114	F:peroxidase activity; F:calcium ion binding; C:membrane; F:oxidoreductase activity; F:oxidoreductase activity, acting on NAD(P)H, oxygen as acceptor; P:oxidation-reduction process
HY10030_c3_g3_i1	polyprenol reductase 2	2348	20	3.48293e-86	85.7	5	C:GO:0005737; P:GO:0006629; C:GO:0016021; F:GO:0016627; P:GO:0055114	C:cytoplasm; P:lipid metabolic process; C:integral component of membrane; F:oxidoreductase activity, acting on the CH-CH group of donors; P:oxidation-reduction process			PTHR14624 (PANTHER)	no GO terms	no GO terms
HY10030_c3_g3_i10	polyprenol reductase 2	2500	20	4.10799e-86	85.7	5	C:GO:0005737; P:GO:0006629; C:GO:0016021; F:GO:0016627; P:GO:0055114	C:cytoplasm; P:lipid metabolic process; C:integral component of membrane; F:oxidoreductase activity, acting on the CH-CH group of donors; P:oxidation-reduction process			PTHR14624 (PANTHER)	no GO terms	no GO terms
HY10030_c3_g3_i11	polyprenol reductase 2	3198	20	1.44661e-48	86.55	5	C:GO:0005737; P:GO:0006629; C:GO:0016021; F:GO:0016627; P:GO:0055114	C:cytoplasm; P:lipid metabolic process; C:integral component of membrane; F:oxidoreductase activity, acting on the CH-CH group of donors; P:oxidation-reduction process			PTHR14624 (PANTHER)	no GO terms	no GO terms
HY10030_c3_g3_i12	polyprenol reductase 2	1721	20	0	77.2	5	C:GO:0005737; P:GO:0006629; C:GO:0016021; F:GO:0016627; P:GO:0055114	C:cytoplasm; P:lipid metabolic process; C:integral component of membrane; F:oxidoreductase activity, acting on the CH-CH group of donors; P:oxidation-reduction process			IPR001104 (PFAM); PTHR14624 (PANTHER); IPR001104 (PROSITE_PROFILES)	C:GO:0005737; P:GO:0006629; C:GO:0016021; F:GO:0016627	C:cytoplasm; P:lipid metabolic process; C:integral component of membrane; F:oxidoreductase activity, acting on the CH-CH group of donors
HY10030_c3_g3_i13	polyprenol reductase 2	2492	20	3.95955e-86	85.7	5	C:GO:0005737; P:GO:0006629; C:GO:0016021; F:GO:0016627; P:GO:0055114	C:cytoplasm; P:lipid metabolic process; C:integral component of membrane; F:oxidoreductase activity, acting on the CH-CH group of donors; P:oxidation-reduction process			PTHR14624 (PANTHER)	no GO terms	no GO terms
HY10030_c3_g3_i14	---NA---	225									no IPS match	no IPS match	no IPS match
HY10030_c3_g3_i15	polyprenol reductase 2	1577	20	0	77.2	5	C:GO:0005737; P:GO:0006629; C:GO:0016021; F:GO:0016627; P:GO:0055114	C:cytoplasm; P:lipid metabolic process; C:integral component of membrane; F:oxidoreductase activity, acting on the CH-CH group of donors; P:oxidation-reduction process			IPR001104 (PFAM); PTHR14624 (PANTHER); IPR001104 (PROSITE_PROFILES)	C:GO:0005737; P:GO:0006629; C:GO:0016021; F:GO:0016627	C:cytoplasm; P:lipid metabolic process; C:integral component of membrane; F:oxidoreductase activity, acting on the CH-CH group of donors
HY10030_c3_g3_i2	polyprenol reductase 2	2427	20	1.14546e-178	74.65	5	C:GO:0005737; P:GO:0006629; C:GO:0016021; F:GO:0016627; P:GO:0055114	C:cytoplasm; P:lipid metabolic process; C:integral component of membrane; F:oxidoreductase activity, acting on the CH-CH group of donors; P:oxidation-reduction process			IPR001104 (PFAM); PTHR14624 (PANTHER); IPR001104 (PROSITE_PROFILES)	C:GO:0005737; P:GO:0006629; C:GO:0016021; F:GO:0016627	C:cytoplasm; P:lipid metabolic process; C:integral component of membrane; F:oxidoreductase activity, acting on the CH-CH group of donors
HY10030_c3_g3_i3	---NA---	220									mobidb-lite (MOBIDB_LITE)	no GO terms	no GO terms
HY10030_c3_g3_i4	polyprenol reductase 2	1607	20	0	85.35	5	C:GO:0005737; P:GO:0006629; C:GO:0016021; F:GO:0016627; P:GO:0055114	C:cytoplasm; P:lipid metabolic process; C:integral component of membrane; F:oxidoreductase activity, acting on the CH-CH group of donors; P:oxidation-reduction process			IPR001104 (PFAM); PTHR14624 (PANTHER); IPR001104 (PROSITE_PROFILES)	C:GO:0005737; P:GO:0006629; C:GO:0016021; F:GO:0016627	C:cytoplasm; P:lipid metabolic process; C:integral component of membrane; F:oxidoreductase activity, acting on the CH-CH group of donors
HY10030_c3_g3_i5	---NA---	322									no IPS match	no IPS match	no IPS match
HY10030_c3_g3_i6	polyprenol reductase 2 isoform X1	613	20	2.60317e-62	91.3	5	C:GO:0005737; P:GO:0006629; C:GO:0016021; F:GO:0016627; P:GO:0055114	C:cytoplasm; P:lipid metabolic process; C:integral component of membrane; F:oxidoreductase activity, acting on the CH-CH group of donors; P:oxidation-reduction process			no IPS match	no IPS match	no IPS match
HY10030_c3_g3_i7	polyprenol reductase 2	2313	20	5.47862e-175	84.45	5	C:GO:0005737; P:GO:0006629; C:GO:0016021; F:GO:0016627; P:GO:0055114	C:cytoplasm; P:lipid metabolic process; C:integral component of membrane; F:oxidoreductase activity, acting on the CH-CH group of donors; P:oxidation-reduction process			IPR001104 (PFAM); PTHR14624 (PANTHER); IPR001104 (PROSITE_PROFILES)	C:GO:0005737; P:GO:0006629; C:GO:0016021; F:GO:0016627	C:cytoplasm; P:lipid metabolic process; C:integral component of membrane; F:oxidoreductase activity, acting on the CH-CH group of donors
HY10030_c3_g3_i8	polyprenol reductase 2	311	20	5.47275e-22	91.7	5	C:GO:0005737; P:GO:0006629; C:GO:0016021; F:GO:0016627; P:GO:0055114	C:cytoplasm; P:lipid metabolic process; C:integral component of membrane; F:oxidoreductase activity, acting on the CH-CH group of donors; P:oxidation-reduction process			IPR001104 (PFAM); PTHR14624 (PANTHER); IPR001104 (PROSITE_PROFILES)	C:GO:0005737; P:GO:0006629; C:GO:0016021; F:GO:0016627	C:cytoplasm; P:lipid metabolic process; C:integral component of membrane; F:oxidoreductase activity, acting on the CH-CH group of donors
HY10030_c3_g3_i9	polyprenol reductase 2	1463	20	0	85.35	5	C:GO:0005737; P:GO:0006629; C:GO:0016021; F:GO:0016627; P:GO:0055114	C:cytoplasm; P:lipid metabolic process; C:integral component of membrane; F:oxidoreductase activity, acting on the CH-CH group of donors; P:oxidation-reduction process			IPR001104 (PFAM); PTHR14624 (PANTHER); IPR001104 (PROSITE_PROFILES)	C:GO:0005737; P:GO:0006629; C:GO:0016021; F:GO:0016627	C:cytoplasm; P:lipid metabolic process; C:integral component of membrane; F:oxidoreductase activity, acting on the CH-CH group of donors
HY10030_c3_g4_i1	probable protein phosphatase 2C 68	5124	20	5.32197e-176	99.65	4	F:GO:0004722; F:GO:0005524; P:GO:0006470; F:GO:0046872	F:protein serine/threonine phosphatase activity; F:ATP binding; P:protein dephosphorylation; F:metal ion binding	EC:3.1.3.16; EC:3.1.3.41	Protein-serine/threonine phosphatase; 4-nitrophenylphosphatase	IPR001932 (PFAM); IPR036457 (G3DSA:3.60.40.GENE3D); PTHR13832:SF239 (PANTHER); IPR015655 (PANTHER); IPR001932 (PROSITE_PROFILES); IPR001932 (CDD); IPR036457 (SUPERFAMILY)	F:GO:0003824; F:GO:0004722; P:GO:0006470	F:catalytic activity; F:protein serine/threonine phosphatase activity; P:protein dephosphorylation
HY10030_c3_g4_i10	probable protein phosphatase 2C 68	5564	20	5.14641e-175	92.25	3	F:GO:0004722; P:GO:0006470; F:GO:0046872	F:protein serine/threonine phosphatase activity; P:protein dephosphorylation; F:metal ion binding	EC:3.1.3.16; EC:3.1.3.41	Protein-serine/threonine phosphatase; 4-nitrophenylphosphatase	IPR001932 (PFAM); IPR036457 (G3DSA:3.60.40.GENE3D); PTHR13832:SF239 (PANTHER); IPR015655 (PANTHER); IPR001932 (PROSITE_PROFILES); IPR001932 (CDD); IPR036457 (SUPERFAMILY)	F:GO:0003824; F:GO:0004722; P:GO:0006470	F:catalytic activity; F:protein serine/threonine phosphatase activity; P:protein dephosphorylation
HY10030_c3_g4_i11	probable protein phosphatase 2C 68	3605	20	0	90.8	3	F:GO:0004722; P:GO:0006470; F:GO:0046872	F:protein serine/threonine phosphatase activity; P:protein dephosphorylation; F:metal ion binding	EC:3.1.3.16; EC:3.1.3.41	Protein-serine/threonine phosphatase; 4-nitrophenylphosphatase	IPR001932 (PFAM); IPR036457 (G3DSA:3.60.40.GENE3D); PTHR13832:SF239 (PANTHER); IPR015655 (PANTHER); IPR001932 (PROSITE_PROFILES); IPR001932 (CDD); IPR036457 (SUPERFAMILY)	F:GO:0003824; F:GO:0004722; P:GO:0006470	F:catalytic activity; F:protein serine/threonine phosphatase activity; P:protein dephosphorylation
HY10030_c3_g4_i2	probable protein phosphatase 2C 68	3977	20	2.81925e-179	99.65	4	F:GO:0004722; F:GO:0005524; P:GO:0006470; F:GO:0046872	F:protein serine/threonine phosphatase activity; F:ATP binding; P:protein dephosphorylation; F:metal ion binding	EC:3.1.3.16; EC:3.1.3.41	Protein-serine/threonine phosphatase; 4-nitrophenylphosphatase	IPR001932 (PFAM); IPR036457 (G3DSA:3.60.40.GENE3D); PTHR13832:SF239 (PANTHER); IPR015655 (PANTHER); IPR001932 (PROSITE_PROFILES); IPR001932 (CDD); IPR036457 (SUPERFAMILY)	F:GO:0003824; F:GO:0004722; P:GO:0006470	F:catalytic activity; F:protein serine/threonine phosphatase activity; P:protein dephosphorylation
HY10030_c3_g4_i3	probable protein phosphatase 2C 68	3625	20	0	90.8	3	F:GO:0004722; P:GO:0006470; F:GO:0046872	F:protein serine/threonine phosphatase activity; P:protein dephosphorylation; F:metal ion binding	EC:3.1.3.16; EC:3.1.3.41	Protein-serine/threonine phosphatase; 4-nitrophenylphosphatase	IPR001932 (PFAM); IPR036457 (G3DSA:3.60.40.GENE3D); PTHR13832:SF239 (PANTHER); IPR015655 (PANTHER); IPR001932 (PROSITE_PROFILES); IPR001932 (CDD); IPR036457 (SUPERFAMILY)	F:GO:0003824; F:GO:0004722; P:GO:0006470	F:catalytic activity; F:protein serine/threonine phosphatase activity; P:protein dephosphorylation
HY10030_c3_g4_i4	probable protein phosphatase 2C 68	3165	20	0	90.8	3	F:GO:0004722; P:GO:0006470; F:GO:0046872	F:protein serine/threonine phosphatase activity; P:protein dephosphorylation; F:metal ion binding	EC:3.1.3.16; EC:3.1.3.41	Protein-serine/threonine phosphatase; 4-nitrophenylphosphatase	IPR001932 (PFAM); IPR036457 (G3DSA:3.60.40.GENE3D); PTHR13832:SF239 (PANTHER); IPR015655 (PANTHER); IPR001932 (PROSITE_PROFILES); IPR001932 (CDD); IPR036457 (SUPERFAMILY)	F:GO:0003824; F:GO:0004722; P:GO:0006470	F:catalytic activity; F:protein serine/threonine phosphatase activity; P:protein dephosphorylation
HY10030_c3_g4_i5	probable protein phosphatase 2C 68	4332	20	0	90.8	3	F:GO:0004722; P:GO:0006470; F:GO:0046872	F:protein serine/threonine phosphatase activity; P:protein dephosphorylation; F:metal ion binding	EC:3.1.3.16; EC:3.1.3.41	Protein-serine/threonine phosphatase; 4-nitrophenylphosphatase	IPR001932 (PFAM); IPR036457 (G3DSA:3.60.40.GENE3D); PTHR13832:SF239 (PANTHER); IPR015655 (PANTHER); IPR001932 (PROSITE_PROFILES); IPR001932 (CDD); IPR036457 (SUPERFAMILY)	F:GO:0003824; F:GO:0004722; P:GO:0006470	F:catalytic activity; F:protein serine/threonine phosphatase activity; P:protein dephosphorylation
HY10030_c3_g4_i6	probable protein phosphatase 2C 68	3185	20	0	90.8	3	F:GO:0004722; P:GO:0006470; F:GO:0046872	F:protein serine/threonine phosphatase activity; P:protein dephosphorylation; F:metal ion binding	EC:3.1.3.16; EC:3.1.3.41	Protein-serine/threonine phosphatase; 4-nitrophenylphosphatase	IPR001932 (PFAM); IPR036457 (G3DSA:3.60.40.GENE3D); PTHR13832:SF239 (PANTHER); IPR015655 (PANTHER); IPR001932 (PROSITE_PROFILES); IPR001932 (CDD); IPR036457 (SUPERFAMILY)	F:GO:0003824; F:GO:0004722; P:GO:0006470	F:catalytic activity; F:protein serine/threonine phosphatase activity; P:protein dephosphorylation
HY10030_c3_g4_i7	probable protein phosphatase 2C 68	4772	20	0	90.8	3	F:GO:0004722; P:GO:0006470; F:GO:0046872	F:protein serine/threonine phosphatase activity; P:protein dephosphorylation; F:metal ion binding	EC:3.1.3.16; EC:3.1.3.41	Protein-serine/threonine phosphatase; 4-nitrophenylphosphatase	IPR001932 (PFAM); IPR036457 (G3DSA:3.60.40.GENE3D); PTHR13832:SF239 (PANTHER); IPR015655 (PANTHER); IPR001932 (PROSITE_PROFILES); IPR001932 (CDD); IPR036457 (SUPERFAMILY)	F:GO:0003824; F:GO:0004722; P:GO:0006470	F:catalytic activity; F:protein serine/threonine phosphatase activity; P:protein dephosphorylation
HY10030_c3_g4_i8	actin	2163	20	5.15167e-170	99.65	1	F:GO:0005524	F:ATP binding			G3DSA:3.30.420.40 (GENE3D); G3DSA:3.90.640.10 (GENE3D); IPR004000 (PFAM); G3DSA:3.30.420.40 (GENE3D); PTHR11937:SF355 (PANTHER); IPR004000 (PANTHER); SSF53067 (SUPERFAMILY)	no GO terms	no GO terms
HY10030_c3_g4_i9	probable protein phosphatase 2C 68	3957	20	2.40077e-179	99.65	4	F:GO:0004722; F:GO:0005524; P:GO:0006470; F:GO:0046872	F:protein serine/threonine phosphatase activity; F:ATP binding; P:protein dephosphorylation; F:metal ion binding	EC:3.1.3.16; EC:3.1.3.41	Protein-serine/threonine phosphatase; 4-nitrophenylphosphatase	IPR001932 (PFAM); IPR036457 (G3DSA:3.60.40.GENE3D); PTHR13832:SF239 (PANTHER); IPR015655 (PANTHER); IPR001932 (PROSITE_PROFILES); IPR001932 (CDD); IPR036457 (SUPERFAMILY)	F:GO:0003824; F:GO:0004722; P:GO:0006470	F:catalytic activity; F:protein serine/threonine phosphatase activity; P:protein dephosphorylation
HY10030_c3_g5_i1	---NA---	636									no IPS match	no IPS match	no IPS match
HY10030_c3_g6_i1	R2R3-MYB transcription factor	250	20	6.36791e-08	98.85	1	F:GO:0003677	F:DNA binding			no IPS match	no IPS match	no IPS match
HY10030_c4_g1_i1	probable protein phosphatase 2C 68	271	3	3.24541e-06	78.67	7	F:GO:0003824; F:GO:0004721; F:GO:0004722; P:GO:0006470; F:GO:0016787; F:GO:0043169; F:GO:0046872	F:catalytic activity; F:phosphoprotein phosphatase activity; F:protein serine/threonine phosphatase activity; P:protein dephosphorylation; F:hydrolase activity; F:cation binding; F:metal ion binding			no IPS match	no IPS match	no IPS match
HY10031_c0_g1_i1	Phosphoesterase domain	843	20	2.15086e-144	80.2	1	F:GO:0016787	F:hydrolase activity			IPR004843 (PFAM); IPR029052 (G3DSA:3.60.21.GENE3D); PTHR36492 (PANTHER); PTHR36492:SF2 (PANTHER); IPR029052 (SUPERFAMILY)	F:GO:0016787	F:hydrolase activity
HY10031_c0_g1_i10	hypothetical protein CISIN_1g0426521mg, partial	894	20	4.51161e-108	78.6	1	F:GO:0016787	F:hydrolase activity			IPR004843 (PFAM); IPR029052 (G3DSA:3.60.21.GENE3D); PTHR36492:SF2 (PANTHER); PTHR36492 (PANTHER); cd00838 (CDD); IPR029052 (SUPERFAMILY)	F:GO:0016787	F:hydrolase activity
HY10031_c0_g1_i11	Phosphoesterase domain	229	20	4.4241e-22	88.35	1	F:GO:0016787	F:hydrolase activity			no IPS match	no IPS match	no IPS match
HY10031_c0_g1_i12	Phosphoesterase domain	866	20	2.29314e-126	78	2	C:GO:0016020; F:GO:0016787	C:membrane; F:hydrolase activity			IPR029052 (G3DSA:3.60.21.GENE3D); IPR004843 (PFAM); PTHR36492:SF2 (PANTHER); PTHR36492 (PANTHER); IPR029052 (SUPERFAMILY)	F:GO:0016787	F:hydrolase activity
HY10031_c0_g1_i13	Phosphoesterase domain	716	20	8.7167e-102	75.05	1	F:GO:0016787	F:hydrolase activity			IPR004843 (PFAM); IPR029052 (G3DSA:3.60.21.GENE3D); PTHR36492:SF2 (PANTHER); PTHR36492 (PANTHER); cd00838 (CDD); IPR029052 (SUPERFAMILY)	F:GO:0016787	F:hydrolase activity
HY10031_c0_g1_i14	Phosphoesterase domain	206	20	1.04083e-33	92.15	1	F:GO:0016787	F:hydrolase activity			PTHR36492:SF2 (PANTHER); PTHR36492 (PANTHER)	no GO terms	no GO terms
HY10031_c0_g1_i2	Phosphoesterase domain	760	20	7.11548e-145	80.2	1	F:GO:0016787	F:hydrolase activity			IPR004843 (PFAM); IPR029052 (G3DSA:3.60.21.GENE3D); PTHR36492 (PANTHER); PTHR36492:SF2 (PANTHER); IPR029052 (SUPERFAMILY)	F:GO:0016787	F:hydrolase activity
HY10031_c0_g1_i3	PREDICTED: uncharacterized protein LOC102629007 isoform X1	822	20	1.00676e-93	68.5	1	F:GO:0016787	F:hydrolase activity			IPR004843 (PFAM); IPR029052 (G3DSA:3.60.21.GENE3D); PTHR36492:SF2 (PANTHER); PTHR36492 (PANTHER); cd00838 (CDD); IPR029052 (SUPERFAMILY)	F:GO:0016787	F:hydrolase activity
HY10031_c0_g1_i4	Phosphoesterase domain	783	20	7.79076e-127	78	2	C:GO:0016020; F:GO:0016787	C:membrane; F:hydrolase activity			IPR029052 (G3DSA:3.60.21.GENE3D); IPR004843 (PFAM); PTHR36492:SF2 (PANTHER); PTHR36492 (PANTHER); IPR029052 (SUPERFAMILY)	F:GO:0016787	F:hydrolase activity
HY10031_c0_g1_i5	Phosphoesterase domain	799	20	1.07275e-101	75.05	1	F:GO:0016787	F:hydrolase activity			IPR004843 (PFAM); IPR029052 (G3DSA:3.60.21.GENE3D); PTHR36492:SF2 (PANTHER); PTHR36492 (PANTHER); cd00838 (CDD); IPR029052 (SUPERFAMILY)	F:GO:0016787	F:hydrolase activity
HY10031_c0_g1_i6	PREDICTED: uncharacterized protein LOC102629007 isoform X1	739	20	3.53409e-94	68.5	1	F:GO:0016787	F:hydrolase activity			IPR004843 (PFAM); IPR029052 (G3DSA:3.60.21.GENE3D); PTHR36492:SF2 (PANTHER); PTHR36492 (PANTHER); cd00838 (CDD); IPR029052 (SUPERFAMILY)	F:GO:0016787	F:hydrolase activity
HY10031_c0_g1_i7	Phosphoesterase domain	1276	20	1.71767e-125	78.7	2	C:GO:0016020; F:GO:0016787	C:membrane; F:hydrolase activity			IPR029052 (G3DSA:3.60.21.GENE3D); IPR004843 (PFAM); PTHR36492 (PANTHER); PTHR36492:SF2 (PANTHER); IPR029052 (SUPERFAMILY)	F:GO:0016787	F:hydrolase activity
HY10031_c0_g1_i8	Phosphoesterase domain	1359	20	4.51295e-125	78.7	2	C:GO:0016020; F:GO:0016787	C:membrane; F:hydrolase activity			IPR029052 (G3DSA:3.60.21.GENE3D); IPR004843 (PFAM); PTHR36492 (PANTHER); PTHR36492:SF2 (PANTHER); IPR029052 (SUPERFAMILY)	F:GO:0016787	F:hydrolase activity
HY10031_c0_g1_i9	hypothetical protein CISIN_1g0426521mg, partial	811	20	1.58314e-108	78.6	1	F:GO:0016787	F:hydrolase activity			IPR004843 (PFAM); IPR029052 (G3DSA:3.60.21.GENE3D); PTHR36492:SF2 (PANTHER); PTHR36492 (PANTHER); cd00838 (CDD); IPR029052 (SUPERFAMILY)	F:GO:0016787	F:hydrolase activity
HY10031_c0_g2_i1	---NA---	879									no IPS match	no IPS match	no IPS match
HY10031_c0_g2_i2	---NA---	624									no IPS match	no IPS match	no IPS match
HY10031_c0_g2_i3	---NA---	1470									no IPS match	no IPS match	no IPS match
HY10031_c0_g2_i4	---NA---	551									no IPS match	no IPS match	no IPS match
HY10031_c0_g3_i1	hypothetical protein CISIN_1g0426522mg, partial	1612	20	3.00477e-44	90.65	1	F:GO:0016787	F:hydrolase activity			PTHR36492 (PANTHER); PTHR36492:SF2 (PANTHER)	no GO terms	no GO terms
HY10031_c0_g3_i2	PREDICTED: uncharacterized protein LOC102629007 isoform X3	725	20	1.61258e-106	90.6	1	F:GO:0016787	F:hydrolase activity			IPR029052 (G3DSA:3.60.21.GENE3D); PTHR36492 (PANTHER); PTHR36492:SF2 (PANTHER)	no GO terms	no GO terms
HY10031_c0_g4_i1	---NA---	269									no IPS match	no IPS match	no IPS match
HY10031_c1_g1_i1	---NA---	226									no IPS match	no IPS match	no IPS match
HY10032_c0_g1_i1	DUF2232 domain-containing protein	2256	20	2.61551e-53	87.15	1	C:GO:0016021	C:integral component of membrane			PTHR37185:SF1 (PANTHER); PTHR37185 (PANTHER)	no GO terms	no GO terms
HY10032_c0_g1_i10	DUF2232 domain-containing protein	2208	20	1.14446e-53	91.8	1	C:GO:0016021	C:integral component of membrane			PTHR37185 (PANTHER); PTHR37185:SF1 (PANTHER)	no GO terms	no GO terms
HY10032_c0_g1_i11	PREDICTED: uncharacterized protein LOC102610092 isoform X3	2374	20	1.53391e-35	92.4	1	C:GO:0016021	C:integral component of membrane			no IPS match	no IPS match	no IPS match
HY10032_c0_g1_i12	PREDICTED: uncharacterized protein LOC102610092 isoform X3	1964	20	5.45189e-50	91.3	1	C:GO:0016021	C:integral component of membrane			PTHR37185 (PANTHER); PTHR37185:SF1 (PANTHER)	no GO terms	no GO terms
HY10032_c0_g1_i2	hypothetical protein CICLE_v10032286mg	1846	20	2.05464e-53	90.6	1	C:GO:0016021	C:integral component of membrane			PTHR37185:SF1 (PANTHER); PTHR37185 (PANTHER)	no GO terms	no GO terms
HY10032_c0_g1_i3	DUF2232 domain-containing protein	1262	20	7.59372e-154	78.55	1	C:GO:0016021	C:integral component of membrane			IPR018710 (PFAM); PTHR37185:SF1 (PANTHER); PTHR37185 (PANTHER)	no GO terms	no GO terms
HY10032_c0_g1_i4	DUF2232 domain-containing protein	1484	20	1.94922e-135	82.8	1	C:GO:0016021	C:integral component of membrane			IPR018710 (PFAM); PTHR37185:SF1 (PANTHER); PTHR37185 (PANTHER)	no GO terms	no GO terms
HY10032_c0_g1_i5	DUF2232 domain-containing protein	1212	20	0	86.35	1	C:GO:0016021	C:integral component of membrane			IPR018710 (PFAM); PTHR37185 (PANTHER); PTHR37185:SF1 (PANTHER)	no GO terms	no GO terms
HY10032_c0_g1_i6	DUF2232 domain-containing protein	1295	20	6.51805e-162	83.75	1	C:GO:0016021	C:integral component of membrane			IPR018710 (PFAM); PTHR37185 (PANTHER); PTHR37185:SF1 (PANTHER)	no GO terms	no GO terms
HY10032_c0_g1_i7	DUF2232 domain-containing protein	2090	20	7.03469e-54	93.15	1	C:GO:0016021	C:integral component of membrane			PTHR37185 (PANTHER); PTHR37185:SF1 (PANTHER)	no GO terms	no GO terms
HY10032_c0_g1_i8	DUF2232 domain-containing protein	1318	20	5.47702e-145	83.8	1	C:GO:0016021	C:integral component of membrane			IPR018710 (PFAM); PTHR37185:SF1 (PANTHER); PTHR37185 (PANTHER)	no GO terms	no GO terms
HY10032_c0_g1_i9	DUF2232 domain-containing protein	1179	20	0	81.1	1	C:GO:0016021	C:integral component of membrane			PTHR37185:SF1 (PANTHER); PTHR37185 (PANTHER)	no GO terms	no GO terms
HY10032_c1_g1_i1	monoacylglycerol lipase ABHD6	1541	20	0	85.3	1	F:GO:0016787	F:hydrolase activity			IPR000073 (PRINTS); IPR000639 (PRINTS); IPR000073 (PFAM); IPR029058 (G3DSA:3.40.50.GENE3D); PTHR43139:SF7 (PANTHER); PTHR43139 (PANTHER); IPR029058 (SUPERFAMILY)	F:GO:0003824	F:catalytic activity
HY10032_c1_g1_i2	Alpha/beta-Hydrolases superfamily protein isoform 1	738	20	1.38486e-28	87.55	2	C:GO:0005886; F:GO:0016787	C:plasma membrane; F:hydrolase activity			IPR029058 (G3DSA:3.40.50.GENE3D); PTHR43139 (PANTHER); PTHR43139:SF8 (PANTHER); IPR029058 (SUPERFAMILY)	no GO terms	no GO terms
HY10032_c1_g1_i3	monoacylglycerol lipase ABHD6	1472	20	0	85.3	1	F:GO:0016787	F:hydrolase activity			IPR000073 (PRINTS); IPR000639 (PRINTS); IPR000073 (PFAM); IPR029058 (G3DSA:3.40.50.GENE3D); PTHR43139:SF7 (PANTHER); PTHR43139 (PANTHER); IPR029058 (SUPERFAMILY)	F:GO:0003824	F:catalytic activity
HY10032_c1_g1_i4	Alpha/beta-Hydrolases superfamily protein isoform 1	777	20	1.96608e-28	87.55	2	C:GO:0005886; F:GO:0016787	C:plasma membrane; F:hydrolase activity			IPR029058 (G3DSA:3.40.50.GENE3D); PTHR43139 (PANTHER); PTHR43139:SF8 (PANTHER); IPR029058 (SUPERFAMILY)	no GO terms	no GO terms
HY10032_c1_g1_i5	monoacylglycerol lipase ABHD6	2304	20	0	85.5	1	F:GO:0016787	F:hydrolase activity			IPR000639 (PRINTS); IPR000073 (PRINTS); IPR000073 (PFAM); IPR029058 (G3DSA:3.40.50.GENE3D); PTHR43139:SF7 (PANTHER); PTHR43139 (PANTHER); IPR029058 (SUPERFAMILY)	F:GO:0003824	F:catalytic activity
HY10032_c1_g1_i6	2-hydroxy-6-oxononadienedioate/2-hydroxy-6-oxononatrienedioate hydrolase	951	20	1.6072e-11	84	1	F:GO:0016787	F:hydrolase activity			no IPS match	no IPS match	no IPS match
HY10032_c1_g1_i7	Alpha/beta-Hydrolases superfamily protein isoform 1	893	20	5.07718e-28	87.55	2	C:GO:0005886; F:GO:0016787	C:plasma membrane; F:hydrolase activity			IPR029058 (G3DSA:3.40.50.GENE3D); PTHR43139 (PANTHER); PTHR43139:SF8 (PANTHER); IPR029058 (SUPERFAMILY)	no GO terms	no GO terms
HY10032_c1_g2_i1	probable polyamine transporter At3g19553	2418	20	0	93.95	6	P:GO:0003333; C:GO:0005887; F:GO:0015179; F:GO:0015203; F:GO:0015297; P:GO:1902047	P:amino acid transmembrane transport; C:integral component of plasma membrane; F:L-amino acid transmembrane transporter activity; F:polyamine transmembrane transporter activity; F:antiporter activity; P:polyamine transmembrane transport			IPR002293 (PFAM); IPR002293 (PIRSF); PTHR11785 (PANTHER); PTHR11785:SF338 (PANTHER)	P:GO:0003333; F:GO:0015171; C:GO:0016020	P:amino acid transmembrane transport; F:amino acid transmembrane transporter activity; C:membrane
HY10032_c1_g2_i2	probable polyamine transporter At3g19553	2921	20	0	94.8	6	P:GO:0003333; C:GO:0005887; F:GO:0015179; F:GO:0015203; F:GO:0015297; P:GO:1902047	P:amino acid transmembrane transport; C:integral component of plasma membrane; F:L-amino acid transmembrane transporter activity; F:polyamine transmembrane transporter activity; F:antiporter activity; P:polyamine transmembrane transport			IPR002293 (PFAM); PTHR11785:SF338 (PANTHER); PTHR11785 (PANTHER)	P:GO:0003333; F:GO:0015171; C:GO:0016020	P:amino acid transmembrane transport; F:amino acid transmembrane transporter activity; C:membrane
HY10032_c1_g2_i3	probable polyamine transporter At3g19553	624	20	2.13459e-49	80.45	6	P:GO:0003333; C:GO:0005887; F:GO:0015179; F:GO:0015203; F:GO:0015297; P:GO:1902047	P:amino acid transmembrane transport; C:integral component of plasma membrane; F:L-amino acid transmembrane transporter activity; F:polyamine transmembrane transporter activity; F:antiporter activity; P:polyamine transmembrane transport			mobidb-lite (MOBIDB_LITE)	no GO terms	no GO terms
HY10032_c1_g2_i4	probable polyamine transporter At3g19553	946	20	8.27179e-113	85.25	6	P:GO:0003333; C:GO:0005887; F:GO:0015179; F:GO:0015203; F:GO:0015297; P:GO:1902047	P:amino acid transmembrane transport; C:integral component of plasma membrane; F:L-amino acid transmembrane transporter activity; F:polyamine transmembrane transporter activity; F:antiporter activity; P:polyamine transmembrane transport			IPR002293 (PFAM); mobidb-lite (MOBIDB_LITE); PTHR11785:SF338 (PANTHER); PTHR11785 (PANTHER)	P:GO:0003333; F:GO:0015171; C:GO:0016020	P:amino acid transmembrane transport; F:amino acid transmembrane transporter activity; C:membrane
HY10032_c1_g2_i5	probable polyamine transporter At3g19553	2678	20	0	94.8	6	P:GO:0003333; C:GO:0005887; F:GO:0015179; F:GO:0015203; F:GO:0015297; P:GO:1902047	P:amino acid transmembrane transport; C:integral component of plasma membrane; F:L-amino acid transmembrane transporter activity; F:polyamine transmembrane transporter activity; F:antiporter activity; P:polyamine transmembrane transport			IPR002293 (PFAM); PTHR11785:SF338 (PANTHER); PTHR11785 (PANTHER)	P:GO:0003333; F:GO:0015171; C:GO:0016020	P:amino acid transmembrane transport; F:amino acid transmembrane transporter activity; C:membrane
HY10032_c1_g2_i6	probable polyamine transporter At3g19553	2233	20	0	90.4	6	P:GO:0003333; C:GO:0005887; F:GO:0015179; F:GO:0015203; F:GO:0015297; P:GO:1902047	P:amino acid transmembrane transport; C:integral component of plasma membrane; F:L-amino acid transmembrane transporter activity; F:polyamine transmembrane transporter activity; F:antiporter activity; P:polyamine transmembrane transport			IPR002293 (PIRSF); IPR002293 (PFAM); mobidb-lite (MOBIDB_LITE); PTHR11785:SF338 (PANTHER); PTHR11785 (PANTHER)	P:GO:0003333; F:GO:0015171; C:GO:0016020	P:amino acid transmembrane transport; F:amino acid transmembrane transporter activity; C:membrane
HY10033_c0_g1_i1	Lecithin:cholesterol/phospholipid:diacylglycerol acyltransferase	2523	20	0	94.45	2	F:GO:0016746; F:GO:0016787	F:transferase activity, transferring acyl groups; F:hydrolase activity			IPR029058 (G3DSA:3.40.50.GENE3D); PTHR31934:SF3 (PANTHER); PTHR31934 (PANTHER); IPR029058 (SUPERFAMILY)	no GO terms	no GO terms
HY10033_c0_g1_i10	Lecithin:cholesterol/phospholipid:diacylglycerol acyltransferase	4581	20	0	83.5	1	F:GO:0016746	F:transferase activity, transferring acyl groups			IPR029058 (G3DSA:3.40.50.GENE3D); PTHR31934 (PANTHER); PTHR31934:SF3 (PANTHER); IPR029058 (SUPERFAMILY)	no GO terms	no GO terms
HY10033_c0_g1_i11	Lecithin:cholesterol/phospholipid:diacylglycerol acyltransferase	2385	20	0	81.8	2	F:GO:0016746; F:GO:0016787	F:transferase activity, transferring acyl groups; F:hydrolase activity			PTHR31934 (PANTHER); PTHR31934:SF3 (PANTHER)	no GO terms	no GO terms
HY10033_c0_g1_i12	Lecithin:cholesterol/phospholipid:diacylglycerol acyltransferase	4463	20	0	83.5	1	F:GO:0016746	F:transferase activity, transferring acyl groups			IPR029058 (G3DSA:3.40.50.GENE3D); PTHR31934 (PANTHER); PTHR31934:SF3 (PANTHER); IPR029058 (SUPERFAMILY)	no GO terms	no GO terms
HY10033_c0_g1_i13	Lecithin:cholesterol/phospholipid:diacylglycerol acyltransferase	3889	20	0	80.65	1	F:GO:0016740	F:transferase activity			IPR029058 (G3DSA:3.40.50.GENE3D); PTHR31934:SF3 (PANTHER); PTHR31934 (PANTHER); IPR029058 (SUPERFAMILY)	no GO terms	no GO terms
HY10033_c0_g1_i14	hypothetical protein CISIN_1g009067mg	500	20	1.59804e-51	62.1						no IPS match	no IPS match	no IPS match
HY10033_c0_g1_i15	Lecithin:cholesterol/phospholipid:diacylglycerol acyltransferase	3828	20	0	83.65	1	F:GO:0016746	F:transferase activity, transferring acyl groups			IPR029058 (G3DSA:3.40.50.GENE3D); PTHR31934:SF3 (PANTHER); PTHR31934 (PANTHER); IPR029058 (SUPERFAMILY)	no GO terms	no GO terms
HY10033_c0_g1_i16	Lecithin:cholesterol/phospholipid:diacylglycerol acyltransferase	2413	20	0	81.8	2	F:GO:0016746; F:GO:0016787	F:transferase activity, transferring acyl groups; F:hydrolase activity			PTHR31934 (PANTHER); PTHR31934:SF3 (PANTHER)	no GO terms	no GO terms
HY10033_c0_g1_i17	Lecithin:cholesterol/phospholipid:diacylglycerol acyltransferase	2480	20	0	81.8	2	F:GO:0016746; F:GO:0016787	F:transferase activity, transferring acyl groups; F:hydrolase activity			PTHR31934 (PANTHER); PTHR31934:SF3 (PANTHER)	no GO terms	no GO terms
HY10033_c0_g1_i18	Lecithin:cholesterol/phospholipid:diacylglycerol acyltransferase	4396	20	0	83.65	1	F:GO:0016746	F:transferase activity, transferring acyl groups			IPR029058 (G3DSA:3.40.50.GENE3D); PTHR31934:SF3 (PANTHER); PTHR31934 (PANTHER); IPR029058 (SUPERFAMILY)	no GO terms	no GO terms
HY10033_c0_g1_i19	Lecithin:cholesterol/phospholipid:diacylglycerol acyltransferase	3625	20	0	82.3	1	F:GO:0016746	F:transferase activity, transferring acyl groups			IPR029058 (G3DSA:3.40.50.GENE3D); PTHR31934 (PANTHER); PTHR31934:SF3 (PANTHER); IPR029058 (SUPERFAMILY)	no GO terms	no GO terms
HY10033_c0_g1_i2	Alpha/beta-Hydrolases superfamily protein	4173	20	3.5568e-108	92.25	1	F:GO:0016787	F:hydrolase activity			PTHR31934:SF3 (PANTHER); PTHR31934 (PANTHER)	no GO terms	no GO terms
HY10033_c0_g1_i20	Lecithin:cholesterol/phospholipid:diacylglycerol acyltransferase	3558	20	0	80.65	1	F:GO:0016740	F:transferase activity			IPR029058 (G3DSA:3.40.50.GENE3D); PTHR31934:SF3 (PANTHER); PTHR31934 (PANTHER); IPR029058 (SUPERFAMILY)	no GO terms	no GO terms
HY10033_c0_g1_i21	Lecithin:cholesterol/phospholipid:diacylglycerol acyltransferase	2495	20	0	94.45	2	F:GO:0016746; F:GO:0016787	F:transferase activity, transferring acyl groups; F:hydrolase activity			IPR029058 (G3DSA:3.40.50.GENE3D); PTHR31934:SF3 (PANTHER); PTHR31934 (PANTHER); IPR029058 (SUPERFAMILY)	no GO terms	no GO terms
HY10033_c0_g1_i22	Lecithin:cholesterol/phospholipid:diacylglycerol acyltransferase	3596	20	0	77.85	1	F:GO:0016746	F:transferase activity, transferring acyl groups			IPR029058 (G3DSA:3.40.50.GENE3D); PTHR31934 (PANTHER); PTHR31934:SF3 (PANTHER); IPR029058 (SUPERFAMILY)	no GO terms	no GO terms
HY10033_c0_g1_i23	Lecithin:cholesterol/phospholipid:diacylglycerol acyltransferase	2680	20	0	94.45	2	F:GO:0016746; F:GO:0016787	F:transferase activity, transferring acyl groups; F:hydrolase activity			IPR029058 (G3DSA:3.40.50.GENE3D); PTHR31934:SF3 (PANTHER); PTHR31934 (PANTHER); IPR029058 (SUPERFAMILY)	no GO terms	no GO terms
HY10033_c0_g1_i24	Lecithin:cholesterol/phospholipid:diacylglycerol acyltransferase	2562	20	0	94.45	2	F:GO:0016746; F:GO:0016787	F:transferase activity, transferring acyl groups; F:hydrolase activity			IPR029058 (G3DSA:3.40.50.GENE3D); PTHR31934:SF3 (PANTHER); PTHR31934 (PANTHER); IPR029058 (SUPERFAMILY)	no GO terms	no GO terms
HY10033_c0_g1_i3	Lecithin:cholesterol/phospholipid:diacylglycerol acyltransferase	2460	20	0	94.45	2	F:GO:0016746; F:GO:0016787	F:transferase activity, transferring acyl groups; F:hydrolase activity			IPR029058 (G3DSA:3.40.50.GENE3D); PTHR31934:SF3 (PANTHER); PTHR31934 (PANTHER); IPR029058 (SUPERFAMILY)	no GO terms	no GO terms
HY10033_c0_g1_i4	Lecithin:cholesterol/phospholipid:diacylglycerol acyltransferase	2446	20	0	94.6	1	F:GO:0016746	F:transferase activity, transferring acyl groups			IPR029058 (G3DSA:3.40.50.GENE3D); PTHR31934 (PANTHER); PTHR31934:SF3 (PANTHER); IPR029058 (SUPERFAMILY)	no GO terms	no GO terms
HY10033_c0_g1_i5	Lecithin:cholesterol/phospholipid:diacylglycerol acyltransferase	3956	20	0	82.3	1	F:GO:0016746	F:transferase activity, transferring acyl groups			IPR029058 (G3DSA:3.40.50.GENE3D); PTHR31934 (PANTHER); PTHR31934:SF3 (PANTHER); IPR029058 (SUPERFAMILY)	no GO terms	no GO terms
HY10033_c0_g1_i6	Alpha/beta-Hydrolases superfamily protein	4055	20	4.63953e-108	92.25	1	F:GO:0016787	F:hydrolase activity			PTHR31934:SF3 (PANTHER); PTHR31934 (PANTHER)	no GO terms	no GO terms
HY10033_c0_g1_i7	Lecithin:cholesterol/phospholipid:diacylglycerol acyltransferase	2481	20	0	94.6	1	F:GO:0016746	F:transferase activity, transferring acyl groups			IPR029058 (G3DSA:3.40.50.GENE3D); PTHR31934 (PANTHER); PTHR31934:SF3 (PANTHER); IPR029058 (SUPERFAMILY)	no GO terms	no GO terms
HY10033_c0_g1_i8	Lecithin:cholesterol/phospholipid:diacylglycerol acyltransferase	3529	20	0	82.6	1	F:GO:0016746	F:transferase activity, transferring acyl groups			IPR029058 (G3DSA:3.40.50.GENE3D); PTHR31934:SF3 (PANTHER); PTHR31934 (PANTHER); IPR029058 (SUPERFAMILY)	no GO terms	no GO terms
HY10033_c0_g1_i9	Alpha/beta-Hydrolases superfamily protein	3882	20	4.79525e-153	92.75	1	F:GO:0016787	F:hydrolase activity			PTHR31934 (PANTHER); PTHR31934:SF3 (PANTHER)	no GO terms	no GO terms
HY10033_c1_g1_i1	fasciclin-like arabinogalactan protein 2	1114	20	4.19041e-122	78.85	1	P:GO:0007155	P:cell adhesion			IPR036378 (G3DSA:2.30.180.GENE3D); IPR000782 (PFAM); mobidb-lite (MOBIDB_LITE); IPR033254 (PANTHER); PTHR32382:SF13 (PANTHER); IPR000782 (PROSITE_PROFILES); IPR036378 (SUPERFAMILY)	no GO terms	no GO terms
HY10033_c1_g1_i10	GTP-binding protein At2g22870	2599	20	2.02378e-117	86	3	F:GO:0005525; C:GO:0005737; F:GO:0016787	F:GTP binding; C:cytoplasm; F:hydrolase activity			IPR006073 (PFAM); G3DSA:3.40.50.300 (GENE3D); mobidb-lite (MOBIDB_LITE); PTHR11649 (PANTHER); PTHR11649:SF71 (PANTHER); IPR030393 (PROSITE_PROFILES); IPR027417 (SUPERFAMILY)	F:GO:0005525	F:GTP binding
HY10033_c1_g1_i2	GTP-binding protein At2g22870	976	20	3.52138e-159	96.1	3	F:GO:0005525; C:GO:0005737; F:GO:0016787	F:GTP binding; C:cytoplasm; F:hydrolase activity			G3DSA:3.40.50.300 (GENE3D); IPR019987 (TIGRFAM); IPR006073 (PFAM); PTHR11649 (PANTHER); PTHR11649:SF71 (PANTHER); IPR030393 (PROSITE_PROFILES); cd01876 (CDD); IPR027417 (SUPERFAMILY)	F:GO:0005525	F:GTP binding
HY10033_c1_g1_i3	GTP-binding protein At2g22870	2106	20	1.70145e-80	94.2	3	F:GO:0005525; C:GO:0005737; F:GO:0016787	F:GTP binding; C:cytoplasm; F:hydrolase activity			G3DSA:3.40.50.300 (GENE3D); PTHR11649:SF71 (PANTHER); PTHR11649 (PANTHER); IPR027417 (SUPERFAMILY)	no GO terms	no GO terms
HY10033_c1_g1_i4	fasciclin-like arabinogalactan protein 2	1675	20	0	84.65	2	P:GO:0007155; C:GO:0016021	P:cell adhesion; C:integral component of membrane			IPR000782 (PFAM); IPR036378 (G3DSA:2.30.180.GENE3D); IPR036378 (G3DSA:2.30.180.GENE3D); mobidb-lite (MOBIDB_LITE); IPR033254 (PANTHER); PTHR32382:SF13 (PANTHER); IPR000782 (PROSITE_PROFILES); IPR000782 (PROSITE_PROFILES); IPR036378 (SUPERFAMILY); IPR036378 (SUPERFAMILY)	no GO terms	no GO terms
HY10033_c1_g1_i5	GTP-binding protein At2g22870	287	20	1.29583e-43	99	3	F:GO:0005525; C:GO:0005737; F:GO:0016787	F:GTP binding; C:cytoplasm; F:hydrolase activity			IPR006073 (PFAM); G3DSA:3.40.50.300 (GENE3D); IPR027417 (SUPERFAMILY)	F:GO:0005525	F:GTP binding
HY10033_c1_g1_i6	---NA---	267									mobidb-lite (MOBIDB_LITE)	no GO terms	no GO terms
HY10033_c1_g1_i7	GTP-binding protein At2g22870	1812	20	1.75737e-81	94.2	3	F:GO:0005525; C:GO:0005737; F:GO:0016787	F:GTP binding; C:cytoplasm; F:hydrolase activity			G3DSA:3.40.50.300 (GENE3D); PTHR11649:SF71 (PANTHER); PTHR11649 (PANTHER); IPR027417 (SUPERFAMILY)	no GO terms	no GO terms
HY10033_c1_g1_i8	fasciclin-like arabinogalactan protein 2	822	20	1.75841e-107	94.4	2	P:GO:0007155; C:GO:0016021	P:cell adhesion; C:integral component of membrane			IPR000782 (PFAM); IPR036378 (G3DSA:2.30.180.GENE3D); IPR033254 (PANTHER); PTHR32382:SF13 (PANTHER); IPR000782 (PROSITE_PROFILES); IPR036378 (SUPERFAMILY)	no GO terms	no GO terms
HY10033_c1_g1_i9	GTP-binding protein At2g22870	2731	20	1.59494e-79	95.2	3	F:GO:0005525; C:GO:0005737; F:GO:0016787	F:GTP binding; C:cytoplasm; F:hydrolase activity			G3DSA:3.40.50.300 (GENE3D); IPR006073 (PFAM); mobidb-lite (MOBIDB_LITE); PTHR11649 (PANTHER); PTHR11649:SF71 (PANTHER); IPR027417 (SUPERFAMILY)	F:GO:0005525	F:GTP binding
HY10033_c1_g2_i1	---NA---	490									no IPS match	no IPS match	no IPS match
HY10033_c1_g3_i1	zinc transport protein ZntB	486	20	1.83902e-17	97.15	4	C:GO:0016021; P:GO:0030001; F:GO:0046873; P:GO:0055085	C:integral component of membrane; P:metal ion transport; F:metal ion transmembrane transporter activity; P:transmembrane transport			no IPS match	no IPS match	no IPS match
HY10034_c0_g1_i1	anthocyanidin 3-O-glucoside 2''-O-glucosyltransferase-like	2129	20	0	86.4	4	P:GO:0008152; C:GO:0043231; F:GO:0080043; F:GO:0080044	P:metabolic process; C:intracellular membrane-bounded organelle; F:quercetin 3-O-glucosyltransferase activity; F:quercetin 7-O-glucosyltransferase activity			G3DSA:3.40.50.2000 (GENE3D); G3DSA:3.40.50.2000 (GENE3D); IPR002213 (PFAM); PTHR11926 (PANTHER); PTHR11926:SF490 (PANTHER); SSF53756 (SUPERFAMILY)	P:GO:0008152; F:GO:0016758	P:metabolic process; F:transferase activity, transferring hexosyl groups
HY10034_c0_g1_i2	anthocyanidin 3-O-glucoside 2''-O-glucosyltransferase-like	2144	20	0	86.4	4	P:GO:0008152; C:GO:0043231; F:GO:0080043; F:GO:0080044	P:metabolic process; C:intracellular membrane-bounded organelle; F:quercetin 3-O-glucosyltransferase activity; F:quercetin 7-O-glucosyltransferase activity			G3DSA:3.40.50.2000 (GENE3D); G3DSA:3.40.50.2000 (GENE3D); IPR002213 (PFAM); PTHR11926 (PANTHER); PTHR11926:SF490 (PANTHER); SSF53756 (SUPERFAMILY)	P:GO:0008152; F:GO:0016758	P:metabolic process; F:transferase activity, transferring hexosyl groups
HY10034_c0_g1_i3	anthocyanidin 3-O-glucoside 2''-O-glucosyltransferase-like	1822	20	0	86.45	4	P:GO:0008152; C:GO:0043231; F:GO:0080043; F:GO:0080044	P:metabolic process; C:intracellular membrane-bounded organelle; F:quercetin 3-O-glucosyltransferase activity; F:quercetin 7-O-glucosyltransferase activity			IPR002213 (PFAM); G3DSA:3.40.50.2000 (GENE3D); G3DSA:3.40.50.2000 (GENE3D); PTHR11926:SF490 (PANTHER); PTHR11926 (PANTHER); SSF53756 (SUPERFAMILY)	P:GO:0008152; F:GO:0016758	P:metabolic process; F:transferase activity, transferring hexosyl groups
HY10034_c0_g1_i4	---NA---	583									mobidb-lite (MOBIDB_LITE)	no GO terms	no GO terms
HY10034_c0_g1_i5	---NA---	598									mobidb-lite (MOBIDB_LITE)	no GO terms	no GO terms
HY10034_c0_g1_i6	anthocyanidin 3-O-glucoside 2''-O-glucosyltransferase-like	305	20	5.53811e-50	95.9	5	P:GO:0008152; F:GO:0033838; C:GO:0043231; F:GO:0080043; F:GO:0080044	P:metabolic process; F:flavonol-3-O-glucoside glucosyltransferase activity; C:intracellular membrane-bounded organelle; F:quercetin 3-O-glucosyltransferase activity; F:quercetin 7-O-glucosyltransferase activity	EC:2.4.1.239	Flavonol-3-O-glucoside glucosyltransferase	G3DSA:3.40.50.2000 (GENE3D); IPR002213 (PFAM); PTHR11926 (PANTHER); PTHR11926:SF490 (PANTHER); SSF53756 (SUPERFAMILY)	P:GO:0008152; F:GO:0016758	P:metabolic process; F:transferase activity, transferring hexosyl groups
HY10034_c0_g2_i1	putative GDP-L-fucose synthase 2	328	20	9.20297e-22	84.5	4	P:GO:0009226; F:GO:0016491; F:GO:0050662; P:GO:0055114	P:nucleotide-sugar biosynthetic process; F:oxidoreductase activity; F:coenzyme binding; P:oxidation-reduction process			no IPS match	no IPS match	no IPS match
HY10034_c0_g2_i2	putative GDP-L-fucose synthase 2	355	20	7.44807e-24	89.9	4	P:GO:0009226; F:GO:0016491; F:GO:0050662; P:GO:0055114	P:nucleotide-sugar biosynthetic process; F:oxidoreductase activity; F:coenzyme binding; P:oxidation-reduction process			no IPS match	no IPS match	no IPS match
HY10034_c0_g3_i1	probable RNA helicase SDE3 isoform X1	1046	8	2.183e-149	81						mobidb-lite (MOBIDB_LITE); mobidb-lite (MOBIDB_LITE)	no GO terms	no GO terms
HY10034_c0_g3_i2	probable RNA helicase SDE3 isoform X1	1085	8	3.33084e-131	80.13						mobidb-lite (MOBIDB_LITE); mobidb-lite (MOBIDB_LITE)	no GO terms	no GO terms
HY10034_c0_g3_i3	probable RNA helicase SDE3 isoform X1	791	8	1.62492e-72	77.75						mobidb-lite (MOBIDB_LITE); mobidb-lite (MOBIDB_LITE)	no GO terms	no GO terms
HY10034_c0_g3_i4	probable RNA helicase SDE3 isoform X1	1180	8	3.4702e-148	80.88						mobidb-lite (MOBIDB_LITE); mobidb-lite (MOBIDB_LITE)	no GO terms	no GO terms
HY10034_c0_g4_i1	---NA---	581									no IPS match	no IPS match	no IPS match
HY10034_c0_g4_i2	---NA---	428									mobidb-lite (MOBIDB_LITE); PS51257 (PROSITE_PROFILES)	no GO terms	no GO terms
HY10034_c0_g4_i3	---NA---	461									mobidb-lite (MOBIDB_LITE); PS51257 (PROSITE_PROFILES)	no GO terms	no GO terms
HY10034_c0_g5_i1	---NA---	248									no IPS match	no IPS match	no IPS match
HY10034_c0_g5_i2	---NA---	417									mobidb-lite (MOBIDB_LITE)	no GO terms	no GO terms
HY10034_c0_g6_i1	---NA---	394									no IPS match	no IPS match	no IPS match
HY10034_c0_g7_i1	putative clathrin assembly protein At4g40080	1738	20	0	82.7	1	F:GO:0005543	F:phospholipid binding			IPR008942 (G3DSA:1.25.40.GENE3D); IPR011417 (PFAM); PTHR22951:SF18 (PANTHER); PTHR22951 (PANTHER); IPR013809 (PROSITE_PROFILES); IPR008942 (SUPERFAMILY)	F:GO:0005543	F:phospholipid binding
HY10034_c0_g7_i2	putative clathrin assembly protein At4g40080	1721	20	0	86.65	3	F:GO:0005543; F:GO:0032440; P:GO:0055114	F:phospholipid binding; F:2-alkenal reductase [NAD(P)] activity; P:oxidation-reduction process	EC:1.3.1.74	2-alkenal reductase (NAD(P)(+))	IPR011417 (PFAM); IPR008942 (G3DSA:1.25.40.GENE3D); PTHR22951:SF18 (PANTHER); PTHR22951 (PANTHER); IPR013809 (PROSITE_PROFILES); IPR008942 (SUPERFAMILY)	F:GO:0005543	F:phospholipid binding
HY10034_c0_g7_i3	putative clathrin assembly protein At4g40080	1744	20	0	82.7	1	F:GO:0005543	F:phospholipid binding			IPR011417 (PFAM); IPR008942 (G3DSA:1.25.40.GENE3D); PTHR22951 (PANTHER); PTHR22951:SF18 (PANTHER); IPR013809 (PROSITE_PROFILES); IPR008942 (SUPERFAMILY)	F:GO:0005543	F:phospholipid binding
HY10034_c0_g7_i4	putative clathrin assembly protein At4g40080	1715	20	0	86.65	3	F:GO:0005543; F:GO:0032440; P:GO:0055114	F:phospholipid binding; F:2-alkenal reductase [NAD(P)] activity; P:oxidation-reduction process	EC:1.3.1.74	2-alkenal reductase (NAD(P)(+))	IPR008942 (G3DSA:1.25.40.GENE3D); IPR011417 (PFAM); PTHR22951:SF18 (PANTHER); PTHR22951 (PANTHER); IPR013809 (PROSITE_PROFILES); IPR008942 (SUPERFAMILY)	F:GO:0005543	F:phospholipid binding
HY10034_c1_g1_i1	tRNA pseudouridine synthase A isoform X2	1245	20	0	81.95	4	P:GO:0001522; F:GO:0003723; P:GO:0008033; F:GO:0009982	P:pseudouridine synthesis; F:RNA binding; P:tRNA processing; F:pseudouridine synthase activity	EC:5.4.99.12	tRNA pseudouridine(38-40) synthase	IPR020095 (G3DSA:3.30.70.GENE3D); IPR001406 (PIRSF); IPR020097 (PFAM); mobidb-lite (MOBIDB_LITE); IPR001406 (PANTHER); PTHR11142:SF0 (PANTHER); IPR020103 (SUPERFAMILY)	P:GO:0001522; F:GO:0003723; P:GO:0009451; F:GO:0009982	P:pseudouridine synthesis; F:RNA binding; P:RNA modification; F:pseudouridine synthase activity
HY10034_c1_g1_i10	tRNA pseudouridine synthase A isoform X2	640	20	5.95821e-46	88.8	4	P:GO:0001522; F:GO:0003723; P:GO:0008033; F:GO:0009982	P:pseudouridine synthesis; F:RNA binding; P:tRNA processing; F:pseudouridine synthase activity	EC:5.4.99.12	tRNA pseudouridine(38-40) synthase	IPR020095 (G3DSA:3.30.70.GENE3D); mobidb-lite (MOBIDB_LITE)	P:GO:0001522; F:GO:0003723; P:GO:0009451; F:GO:0009982	P:pseudouridine synthesis; F:RNA binding; P:RNA modification; F:pseudouridine synthase activity
HY10034_c1_g1_i11	tRNA pseudouridine synthase A isoform X1	734	20	1.20389e-32	92.4	4	P:GO:0001522; F:GO:0003723; P:GO:0008033; F:GO:0009982	P:pseudouridine synthesis; F:RNA binding; P:tRNA processing; F:pseudouridine synthase activity	EC:5.4.99.12	tRNA pseudouridine(38-40) synthase	mobidb-lite (MOBIDB_LITE)	no GO terms	no GO terms
HY10034_c1_g1_i2	tRNA pseudouridine synthase A isoform X1	2449	20	1.94595e-95	93.75	4	P:GO:0001522; F:GO:0003723; P:GO:0008033; F:GO:0009982	P:pseudouridine synthesis; F:RNA binding; P:tRNA processing; F:pseudouridine synthase activity	EC:5.4.99.12	tRNA pseudouridine(38-40) synthase	IPR020095 (G3DSA:3.30.70.GENE3D); IPR020097 (PFAM); PTHR11142:SF0 (PANTHER); IPR001406 (PANTHER); IPR020103 (SUPERFAMILY)	P:GO:0001522; F:GO:0003723; P:GO:0009451; F:GO:0009982	P:pseudouridine synthesis; F:RNA binding; P:RNA modification; F:pseudouridine synthase activity
HY10034_c1_g1_i3	tRNA pseudouridine synthase A isoform X2	1395	20	0	81.75	3	F:GO:0003723; F:GO:0009982; P:GO:0031119	F:RNA binding; F:pseudouridine synthase activity; P:tRNA pseudouridine synthesis	EC:5.4.99.12	tRNA pseudouridine(38-40) synthase	IPR001406 (PIRSF); IPR020097 (PFAM); IPR020095 (G3DSA:3.30.70.GENE3D); IPR001406 (PANTHER); PTHR11142:SF0 (PANTHER); IPR020103 (SUPERFAMILY)	P:GO:0001522; F:GO:0003723; P:GO:0009451; F:GO:0009982	P:pseudouridine synthesis; F:RNA binding; P:RNA modification; F:pseudouridine synthase activity
HY10034_c1_g1_i4	tRNA pseudouridine synthase A isoform X2	1618	20	1.64862e-98	91.5	4	P:GO:0001522; F:GO:0003723; P:GO:0008033; F:GO:0009982	P:pseudouridine synthesis; F:RNA binding; P:tRNA processing; F:pseudouridine synthase activity	EC:5.4.99.12	tRNA pseudouridine(38-40) synthase	IPR020095 (G3DSA:3.30.70.GENE3D); IPR020097 (PFAM); PTHR11142:SF0 (PANTHER); IPR001406 (PANTHER); IPR020103 (SUPERFAMILY)	P:GO:0001522; F:GO:0003723; P:GO:0009451; F:GO:0009982	P:pseudouridine synthesis; F:RNA binding; P:RNA modification; F:pseudouridine synthase activity
HY10034_c1_g1_i5	tRNA pseudouridine synthase A isoform X2	591	20	1.2673e-54	67.3	4	P:GO:0001522; F:GO:0003723; P:GO:0008033; F:GO:0009982	P:pseudouridine synthesis; F:RNA binding; P:tRNA processing; F:pseudouridine synthase activity	EC:5.4.99.12	tRNA pseudouridine(38-40) synthase	IPR020095 (G3DSA:3.30.70.GENE3D); mobidb-lite (MOBIDB_LITE)	P:GO:0001522; F:GO:0003723; P:GO:0009451; F:GO:0009982	P:pseudouridine synthesis; F:RNA binding; P:RNA modification; F:pseudouridine synthase activity
HY10034_c1_g1_i6	tRNA pseudouridine synthase A isoform X2	1808	20	0	84.4	3	F:GO:0003723; F:GO:0009982; P:GO:0031119	F:RNA binding; F:pseudouridine synthase activity; P:tRNA pseudouridine synthesis	EC:5.4.99.12	tRNA pseudouridine(38-40) synthase	IPR020097 (PFAM); IPR020095 (G3DSA:3.30.70.GENE3D); G3DSA:3.30.70.580 (GENE3D); mobidb-lite (MOBIDB_LITE); mobidb-lite (MOBIDB_LITE); IPR001406 (PANTHER); PTHR11142:SF0 (PANTHER); IPR001406 (HAMAP); cd02570 (CDD); IPR020103 (SUPERFAMILY)	P:GO:0001522; F:GO:0003723; P:GO:0009451; F:GO:0009982	P:pseudouridine synthesis; F:RNA binding; P:RNA modification; F:pseudouridine synthase activity
HY10034_c1_g1_i7	tRNA pseudouridine synthase A isoform X1	1340	20	5.62046e-144	80.45	3	F:GO:0003723; F:GO:0009982; P:GO:0031119	F:RNA binding; F:pseudouridine synthase activity; P:tRNA pseudouridine synthesis	EC:5.4.99.12	tRNA pseudouridine(38-40) synthase	IPR020097 (PFAM); IPR020095 (G3DSA:3.30.70.GENE3D); mobidb-lite (MOBIDB_LITE); PTHR11142:SF0 (PANTHER); IPR001406 (PANTHER); IPR020103 (SUPERFAMILY)	P:GO:0001522; F:GO:0003723; P:GO:0009451; F:GO:0009982	P:pseudouridine synthesis; F:RNA binding; P:RNA modification; F:pseudouridine synthase activity
HY10034_c1_g1_i8	tRNA pseudouridine synthase A isoform X2	2181	20	9.03637e-147	92.6	3	F:GO:0003723; F:GO:0009982; P:GO:0031119	F:RNA binding; F:pseudouridine synthase activity; P:tRNA pseudouridine synthesis	EC:5.4.99.12	tRNA pseudouridine(38-40) synthase	IPR020097 (PFAM); G3DSA:3.30.70.580 (GENE3D); IPR020095 (G3DSA:3.30.70.GENE3D); IPR001406 (PIRSF); mobidb-lite (MOBIDB_LITE); IPR001406 (PANTHER); PTHR11142:SF0 (PANTHER); cd02570 (CDD); IPR020103 (SUPERFAMILY)	P:GO:0001522; F:GO:0003723; P:GO:0009451; F:GO:0009982	P:pseudouridine synthesis; F:RNA binding; P:RNA modification; F:pseudouridine synthase activity
HY10034_c1_g1_i9	tRNA pseudouridine synthase A isoform X2	2224	20	1.54119e-115	91.15	3	F:GO:0003723; F:GO:0009982; P:GO:0031119	F:RNA binding; F:pseudouridine synthase activity; P:tRNA pseudouridine synthesis	EC:5.4.99.12	tRNA pseudouridine(38-40) synthase	IPR020097 (PFAM); G3DSA:3.30.70.580 (GENE3D); mobidb-lite (MOBIDB_LITE); IPR001406 (PANTHER); PTHR11142:SF0 (PANTHER); IPR020103 (SUPERFAMILY)	P:GO:0001522; F:GO:0003723; P:GO:0009451; F:GO:0009982	P:pseudouridine synthesis; F:RNA binding; P:RNA modification; F:pseudouridine synthase activity
HY10034_c1_g2_i1	hypothetical protein CICLE_v10029932mg	378	1	1.77517e-12	96						no IPS match	no IPS match	no IPS match
HY10034_c1_g3_i1	tRNA pseudouridine synthase A isoform X1	1018	20	6.85363e-43	93.75	4	P:GO:0001522; F:GO:0003723; P:GO:0008033; F:GO:0009982	P:pseudouridine synthesis; F:RNA binding; P:tRNA processing; F:pseudouridine synthase activity	EC:5.4.99.12	tRNA pseudouridine(38-40) synthase	G3DSA:3.30.70.580 (GENE3D); PTHR11142:SF0 (PANTHER); IPR001406 (PANTHER); IPR020103 (SUPERFAMILY)	P:GO:0001522; F:GO:0003723; P:GO:0009451; F:GO:0009982	P:pseudouridine synthesis; F:RNA binding; P:RNA modification; F:pseudouridine synthase activity
HY10035_c0_g1_i1	ABC transporter B family member 6	830	20	3.02321e-26	92.2	5	F:GO:0005524; P:GO:0006855; F:GO:0008559; C:GO:0016021; P:GO:0042908	F:ATP binding; P:drug transmembrane transport; F:xenobiotic transmembrane transporting ATPase activity; C:integral component of membrane; P:xenobiotic transport	EC:3.6.1.3; EC:3.6.3.44; EC:3.6.1.15	Adenosinetriphosphatase; Xenobiotic-transporting ATPase; Nucleoside-triphosphate phosphatase	no IPS match	no IPS match	no IPS match
HY10035_c1_g1_i1	serine/arginine-rich splicing factor SC35-like	588	20	4.07606e-07	97.9	1	F:GO:0003723	F:RNA binding			no IPS match	no IPS match	no IPS match
HY10035_c1_g1_i2	serine/arginine-rich splicing factor SC35-like	457	20	1.75835e-07	97.9	2	F:GO:0003723; C:GO:0016021	F:RNA binding; C:integral component of membrane			no IPS match	no IPS match	no IPS match
HY10035_c2_g1_i1	arabinogalactan peptide 21-like	1145	1	1.56459e-13	100						PTHR34114 (PANTHER); PTHR34114:SF2 (PANTHER)	no GO terms	no GO terms
HY10035_c3_g1_i1	polyubiquitin 9-like	3108	20	7.31075e-172	83.05	1	F:GO:0005515	F:protein binding			IPR019956 (PRINTS); IPR000626 (PFAM); G3DSA:3.10.20.90 (GENE3D); G3DSA:3.10.20.90 (GENE3D); PTHR10666:SF241 (PANTHER); PTHR10666 (PANTHER); IPR000626 (PROSITE_PROFILES); IPR000626 (PROSITE_PROFILES); IPR000626 (PROSITE_PROFILES); cd00196 (CDD); cd01769 (CDD); cd01769 (CDD); IPR029071 (SUPERFAMILY); IPR029071 (SUPERFAMILY); IPR029071 (SUPERFAMILY)	F:GO:0005515	F:protein binding
HY10035_c3_g1_i10	cysteine-rich PDZ-binding protein	2663	20	8.2175e-36	74.75	3	F:GO:0004867; P:GO:0009611; P:GO:0010951	F:serine-type endopeptidase inhibitor activity; P:response to wounding; P:negative regulation of endopeptidase activity			IPR000864 (PFAM); G3DSA:3.30.10.10 (GENE3D); IPR000864 (PANTHER); PTHR33091:SF15 (PANTHER); IPR000864 (PRODOM); IPR036354 (SUPERFAMILY)	F:GO:0004867; P:GO:0009611	F:serine-type endopeptidase inhibitor activity; P:response to wounding
HY10035_c3_g1_i11	inhibitor of trypsin and hageman factor-like	758	20	1.65886e-45	77.9	3	F:GO:0004867; P:GO:0009611; P:GO:0010951	F:serine-type endopeptidase inhibitor activity; P:response to wounding; P:negative regulation of endopeptidase activity			IPR000864 (PRINTS); IPR000864 (PFAM); G3DSA:3.30.10.10 (GENE3D); IPR000864 (PANTHER); PTHR33091:SF15 (PANTHER); IPR000864 (PRODOM); IPR036354 (SUPERFAMILY)	F:GO:0004867; P:GO:0009611	F:serine-type endopeptidase inhibitor activity; P:response to wounding
HY10035_c3_g1_i12	cysteine-rich PDZ-binding protein	2215	20	1.31883e-58	96						IPR019367 (PFAM); IPR019367 (PANTHER)	no GO terms	no GO terms
HY10035_c3_g1_i13	polyubiquitin 9-like	1563	20	7.4395e-179	83.05	1	F:GO:0005515	F:protein binding			IPR019956 (PRINTS); IPR000626 (PFAM); G3DSA:3.10.20.90 (GENE3D); G3DSA:3.10.20.90 (GENE3D); PTHR10666:SF241 (PANTHER); PTHR10666 (PANTHER); IPR000626 (PROSITE_PROFILES); IPR000626 (PROSITE_PROFILES); IPR000626 (PROSITE_PROFILES); cd00196 (CDD); cd01769 (CDD); cd01769 (CDD); IPR029071 (SUPERFAMILY); IPR029071 (SUPERFAMILY); IPR029071 (SUPERFAMILY)	F:GO:0005515	F:protein binding
HY10035_c3_g1_i14	polyubiquitin 9-like	3696	20	9.67476e-170	83.05	1	F:GO:0005515	F:protein binding			IPR019956 (PRINTS); IPR000626 (PFAM); G3DSA:3.10.20.90 (GENE3D); G3DSA:3.10.20.90 (GENE3D); PTHR10666:SF241 (PANTHER); PTHR10666 (PANTHER); IPR000626 (PROSITE_PROFILES); IPR000626 (PROSITE_PROFILES); IPR000626 (PROSITE_PROFILES); cd00196 (CDD); cd01769 (CDD); cd01769 (CDD); IPR029071 (SUPERFAMILY); IPR029071 (SUPERFAMILY); IPR029071 (SUPERFAMILY)	F:GO:0005515	F:protein binding
HY10035_c3_g1_i2	polyubiquitin 9-like	3784	20	1.92457e-169	83.05	1	F:GO:0005515	F:protein binding			IPR019956 (PRINTS); IPR000626 (PFAM); G3DSA:3.10.20.90 (GENE3D); G3DSA:3.10.20.90 (GENE3D); PTHR10666:SF241 (PANTHER); PTHR10666 (PANTHER); IPR000626 (PROSITE_PROFILES); IPR000626 (PROSITE_PROFILES); IPR000626 (PROSITE_PROFILES); cd00196 (CDD); cd01769 (CDD); cd01769 (CDD); IPR029071 (SUPERFAMILY); IPR029071 (SUPERFAMILY); IPR029071 (SUPERFAMILY)	F:GO:0005515	F:protein binding
HY10035_c3_g1_i3	cysteine-rich PDZ-binding protein	1313	20	4.01528e-61	96						IPR019367 (PFAM); IPR019367 (PANTHER)	no GO terms	no GO terms
HY10035_c3_g1_i4	cysteine-rich PDZ-binding protein	2303	20	1.88318e-58	96						IPR019367 (PFAM); IPR019367 (PANTHER)	no GO terms	no GO terms
HY10035_c3_g1_i5	polyubiquitin 9-like	3113	20	7.71093e-172	83.05	1	F:GO:0005515	F:protein binding			IPR019956 (PRINTS); IPR000626 (PFAM); G3DSA:3.10.20.90 (GENE3D); G3DSA:3.10.20.90 (GENE3D); PTHR10666:SF241 (PANTHER); PTHR10666 (PANTHER); IPR000626 (PROSITE_PROFILES); IPR000626 (PROSITE_PROFILES); IPR000626 (PROSITE_PROFILES); cd00196 (CDD); cd01769 (CDD); cd01769 (CDD); IPR029071 (SUPERFAMILY); IPR029071 (SUPERFAMILY); IPR029071 (SUPERFAMILY)	F:GO:0005515	F:protein binding
HY10035_c3_g1_i6	cysteine-rich PDZ-binding protein	2979	20	1.7723e-41	74.55	3	F:GO:0004867; P:GO:0009611; P:GO:0010951	F:serine-type endopeptidase inhibitor activity; P:response to wounding; P:negative regulation of endopeptidase activity			IPR000864 (PRINTS); IPR000864 (PFAM); G3DSA:3.30.10.10 (GENE3D); IPR000864 (PANTHER); PTHR33091:SF15 (PANTHER); IPR000864 (PRODOM); IPR036354 (SUPERFAMILY)	F:GO:0004867; P:GO:0009611	F:serine-type endopeptidase inhibitor activity; P:response to wounding
HY10035_c3_g1_i7	cysteine-rich PDZ-binding protein	2308	20	1.92767e-58	96						IPR019367 (PFAM); IPR019367 (PANTHER)	no GO terms	no GO terms
HY10035_c3_g1_i8	polyubiquitin 9-like	3020	20	3.3488e-172	83.05	1	F:GO:0005515	F:protein binding			IPR019956 (PRINTS); IPR000626 (PFAM); G3DSA:3.10.20.90 (GENE3D); G3DSA:3.10.20.90 (GENE3D); PTHR10666:SF241 (PANTHER); PTHR10666 (PANTHER); IPR000626 (PROSITE_PROFILES); IPR000626 (PROSITE_PROFILES); IPR000626 (PROSITE_PROFILES); cd00196 (CDD); cd01769 (CDD); cd01769 (CDD); IPR029071 (SUPERFAMILY); IPR029071 (SUPERFAMILY); IPR029071 (SUPERFAMILY)	F:GO:0005515	F:protein binding
HY10035_c3_g1_i9	polyubiquitin 9-like	3025	20	3.53575e-172	83.05	1	F:GO:0005515	F:protein binding			IPR019956 (PRINTS); IPR000626 (PFAM); G3DSA:3.10.20.90 (GENE3D); G3DSA:3.10.20.90 (GENE3D); PTHR10666:SF241 (PANTHER); PTHR10666 (PANTHER); IPR000626 (PROSITE_PROFILES); IPR000626 (PROSITE_PROFILES); IPR000626 (PROSITE_PROFILES); cd00196 (CDD); cd01769 (CDD); cd01769 (CDD); IPR029071 (SUPERFAMILY); IPR029071 (SUPERFAMILY); IPR029071 (SUPERFAMILY)	F:GO:0005515	F:protein binding
HY10035_c4_g1_i1	protein root UVB sensitive 4	1523	20	0	84.8						IPR006968 (PFAM); PTHR12770:SF23 (PANTHER); IPR006968 (PANTHER)	no GO terms	no GO terms
HY10035_c4_g1_i10	protein root UVB sensitive 4	1331	20	5.37981e-115	58.5						IPR006968 (PFAM); PTHR12770:SF23 (PANTHER); IPR006968 (PANTHER)	no GO terms	no GO terms
HY10035_c4_g1_i11	protein root UVB sensitive 4	1046	20	0	86.4	1	C:GO:0016021	C:integral component of membrane			IPR006968 (PFAM); IPR006968 (PANTHER); PTHR12770:SF23 (PANTHER)	no GO terms	no GO terms
HY10035_c4_g1_i12	protein root UVB sensitive 4	2506	20	0	85.6						IPR006968 (PFAM); PTHR12770:SF23 (PANTHER); IPR006968 (PANTHER)	no GO terms	no GO terms
HY10035_c4_g1_i13	protein root UVB sensitive 4	347	20	6.2166e-05	80	2	C:GO:0016020; C:GO:0016021	C:membrane; C:integral component of membrane			no IPS match	no IPS match	no IPS match
HY10035_c4_g1_i14	protein root UVB sensitive 4	643	20	1.11074e-105	79.45						PTHR12770:SF23 (PANTHER); IPR006968 (PANTHER)	no GO terms	no GO terms
HY10035_c4_g1_i2	protein root UVB sensitive 4 isoform X2	1594	20	0	84.35						IPR006968 (PFAM); PTHR12770:SF23 (PANTHER); IPR006968 (PANTHER)	no GO terms	no GO terms
HY10035_c4_g1_i3	protein root UVB sensitive 4	2429	20	1.32109e-157	82.95	1	C:GO:0016021	C:integral component of membrane			IPR006968 (PFAM); PTHR12770:SF23 (PANTHER); IPR006968 (PANTHER)	no GO terms	no GO terms
HY10035_c4_g1_i4	protein root UVB sensitive 4	2978	20	0	84.8						IPR006968 (PFAM); PTHR12770:SF23 (PANTHER); IPR006968 (PANTHER)	no GO terms	no GO terms
HY10035_c4_g1_i5	protein root UVB sensitive 4 isoform X2	2611	20	0	76.55						IPR006968 (PFAM); IPR006968 (PANTHER); PTHR12770:SF23 (PANTHER)	no GO terms	no GO terms
HY10035_c4_g1_i6	protein root UVB sensitive 4	1076	20	0	84.8						IPR006968 (PFAM); IPR006968 (PANTHER); PTHR12770:SF23 (PANTHER)	no GO terms	no GO terms
HY10035_c4_g1_i7	protein root UVB sensitive 4	1068	20	2.08199e-129	79.35						PTHR12770:SF23 (PANTHER); IPR006968 (PANTHER)	no GO terms	no GO terms
HY10035_c4_g1_i8	protein root UVB sensitive 4	2566	20	0	85.25						IPR006968 (PFAM); PTHR12770:SF23 (PANTHER); IPR006968 (PANTHER)	no GO terms	no GO terms
HY10035_c4_g1_i9	protein root UVB sensitive 4 isoform X2	544	20	2.98155e-52	60.1						IPR006968 (PFAM); PTHR12770:SF23 (PANTHER); IPR006968 (PANTHER)	no GO terms	no GO terms
HY10035_c5_g1_i1	non-classical arabinogalactan protein 31-like	228	20	5.35868e-12	68.95	3	F:GO:0005199; C:GO:0016020; C:GO:0016021	F:structural constituent of cell wall; C:membrane; C:integral component of membrane			no IPS match	no IPS match	no IPS match
HY10035_c6_g1_i1	ribonuclease E/G-like protein, chloroplastic	267	20	2.92191e-08	100	8	F:GO:0003723; F:GO:0004521; C:GO:0009507; P:GO:0009658; P:GO:0010239; P:GO:0090502; P:GO:1901259; F:GO:2001070	F:RNA binding; F:endoribonuclease activity; C:chloroplast; P:chloroplast organization; P:chloroplast mRNA processing; P:RNA phosphodiester bond hydrolysis, endonucleolytic; P:chloroplast rRNA processing; F:starch binding			no IPS match	no IPS match	no IPS match
HY10035_c7_g1_i1	---NA---	217									no IPS match	no IPS match	no IPS match
HY10036_c0_g1_i1	histone-lysine N-methyltransferase 2D isoform X2	1349	5	1.26336e-20	95.4	2	C:GO:0016020; C:GO:0016021	C:membrane; C:integral component of membrane			no IPS match	no IPS match	no IPS match
HY10036_c0_g1_i2	histone-lysine N-methyltransferase 2D isoform X2	2561	20	0	87.45	1	C:GO:0016021	C:integral component of membrane			mobidb-lite (MOBIDB_LITE); PTHR33826 (PANTHER); PTHR33826:SF4 (PANTHER)	no GO terms	no GO terms
HY10036_c0_g1_i3	histone-lysine N-methyltransferase 2D isoform X2	1566	20	9.39681e-161	90.65	1	C:GO:0016021	C:integral component of membrane			mobidb-lite (MOBIDB_LITE); PTHR33826 (PANTHER); PTHR33826:SF4 (PANTHER)	no GO terms	no GO terms
HY10036_c0_g1_i4	histone-lysine N-methyltransferase 2D isoform X2	1676	20	1.71473e-88	93.9	1	C:GO:0016021	C:integral component of membrane			mobidb-lite (MOBIDB_LITE); PTHR33826 (PANTHER); PTHR33826:SF4 (PANTHER)	no GO terms	no GO terms
HY10036_c0_g1_i5	---NA---	210									no IPS match	no IPS match	no IPS match
HY10036_c0_g1_i6	histone-lysine N-methyltransferase 2D isoform X2	2694	20	0	87.2	1	C:GO:0016021	C:integral component of membrane			mobidb-lite (MOBIDB_LITE); PTHR33826:SF4 (PANTHER); PTHR33826 (PANTHER)	no GO terms	no GO terms
HY10036_c0_g1_i7	histone-lysine N-methyltransferase 2D isoform X2	1543	20	1.22929e-79	94.2	1	C:GO:0016021	C:integral component of membrane			mobidb-lite (MOBIDB_LITE); PTHR33826:SF4 (PANTHER); PTHR33826 (PANTHER)	no GO terms	no GO terms
HY10036_c0_g1_i8	histone-lysine N-methyltransferase 2D isoform X2	2509	20	9.75255e-176	91.3	1	C:GO:0016021	C:integral component of membrane			mobidb-lite (MOBIDB_LITE); PTHR33826:SF4 (PANTHER); PTHR33826 (PANTHER)	no GO terms	no GO terms
HY10036_c0_g2_i1	beta-glucuronosyltransferase GlcAT14B-like	1290	20	1.87656e-175	93.55	2	F:GO:0008375; C:GO:0016021	F:acetylglucosaminyltransferase activity; C:integral component of membrane			IPR003406 (PFAM); PTHR19297 (PANTHER); PTHR19297:SF98 (PANTHER)	F:GO:0008375; C:GO:0016020	F:acetylglucosaminyltransferase activity; C:membrane
HY10036_c0_g2_i2	beta-glucuronosyltransferase GlcAT14B-like	1207	20	1.06032e-154	92.75	2	F:GO:0008375; C:GO:0016021	F:acetylglucosaminyltransferase activity; C:integral component of membrane			IPR003406 (PFAM); PTHR19297 (PANTHER); PTHR19297:SF98 (PANTHER)	F:GO:0008375; C:GO:0016020	F:acetylglucosaminyltransferase activity; C:membrane
HY10036_c0_g2_i3	beta-glucuronosyltransferase GlcAT14B-like	1142	20	1.88587e-95	88.1	2	F:GO:0008375; C:GO:0016021	F:acetylglucosaminyltransferase activity; C:integral component of membrane			IPR003406 (PFAM); PTHR19297:SF98 (PANTHER); PTHR19297 (PANTHER)	F:GO:0008375; C:GO:0016020	F:acetylglucosaminyltransferase activity; C:membrane
HY10036_c0_g2_i4	beta-glucuronosyltransferase GlcAT14B-like	1999	20	0	90.65	2	F:GO:0008375; C:GO:0016021	F:acetylglucosaminyltransferase activity; C:integral component of membrane			IPR003406 (PFAM); PTHR19297:SF98 (PANTHER); PTHR19297 (PANTHER)	F:GO:0008375; C:GO:0016020	F:acetylglucosaminyltransferase activity; C:membrane
HY10036_c0_g3_i1	pentatricopeptide repeat-containing protein At3g25210, mitochondrial	2067	20	0	83.9	6	F:GO:0003723; F:GO:0004519; F:GO:0005515; P:GO:0009451; C:GO:0043231; P:GO:0090305	F:RNA binding; F:endonuclease activity; F:protein binding; P:RNA modification; C:intracellular membrane-bounded organelle; P:nucleic acid phosphodiester bond hydrolysis			IPR011990 (G3DSA:1.25.40.GENE3D); G3DSA:3.30.2320.10 (GENE3D); IPR002885 (TIGRFAM); IPR002885 (PFAM); IPR002885 (PFAM); IPR002885 (PFAM); mobidb-lite (MOBIDB_LITE); PTHR24015 (PANTHER); PTHR24015:SF355 (PANTHER); IPR002885 (PROSITE_PROFILES); IPR002885 (PROSITE_PROFILES); IPR002885 (PROSITE_PROFILES); IPR002885 (PROSITE_PROFILES); IPR002885 (PROSITE_PROFILES); IPR002885 (PROSITE_PROFILES)	F:GO:0005515	F:protein binding
HY10036_c0_g4_i1	---NA---	227									no IPS match	no IPS match	no IPS match
HY10036_c0_g4_i2	---NA---	716									mobidb-lite (MOBIDB_LITE)	no GO terms	no GO terms
HY10036_c0_g4_i3	B-box zinc finger protein 19	940	20	6.98563e-09	89.9	2	C:GO:0005622; F:GO:0008270	C:intracellular; F:zinc ion binding			no IPS match	no IPS match	no IPS match
HY10037_c0_g1_i1	glutamate receptor 2.8-like	489	20	5.51816e-44	71.25	4	F:GO:0004970; P:GO:0006811; C:GO:0016021; P:GO:0035235	F:ionotropic glutamate receptor activity; P:ion transport; C:integral component of membrane; P:ionotropic glutamate receptor signaling pathway			PTHR34836 (PANTHER)	no GO terms	no GO terms
HY10037_c0_g1_i2	glutamate receptor 2.8-like	1003	20	2.24385e-36	72.35	4	F:GO:0004970; P:GO:0006811; C:GO:0016021; P:GO:0035235	F:ionotropic glutamate receptor activity; P:ion transport; C:integral component of membrane; P:ionotropic glutamate receptor signaling pathway			no IPS match	no IPS match	no IPS match
HY10037_c0_g1_i3	glutamate receptor 2.8-like	735	20	1.68392e-37	74.35	4	F:GO:0004970; P:GO:0006811; C:GO:0016021; P:GO:0035235	F:ionotropic glutamate receptor activity; P:ion transport; C:integral component of membrane; P:ionotropic glutamate receptor signaling pathway			no IPS match	no IPS match	no IPS match
HY10037_c0_g1_i4	glutamate receptor 2.8-like	613	20	2.27109e-39	73.4	4	F:GO:0004970; P:GO:0006811; C:GO:0016021; P:GO:0035235	F:ionotropic glutamate receptor activity; P:ion transport; C:integral component of membrane; P:ionotropic glutamate receptor signaling pathway			no IPS match	no IPS match	no IPS match
HY10037_c0_g1_i5	---NA---	212									no IPS match	no IPS match	no IPS match
HY10038_c0_g1_i1	---NA---	424									no IPS match	no IPS match	no IPS match
HY10038_c0_g1_i10	hypothetical protein CISIN_1g023984mg	2871	20	1.18446e-44	90.7						PTHR37178 (PANTHER)	no GO terms	no GO terms
HY10038_c0_g1_i11	hypothetical protein CISIN_1g023984mg	4425	20	2.04947e-44	90.7						PTHR37178 (PANTHER)	no GO terms	no GO terms
HY10038_c0_g1_i12	vesicle transport v-SNARE 12-like	4588	20	8.33774e-105	92.05	15	F:GO:0000149; F:GO:0005484; C:GO:0005789; C:GO:0005794; C:GO:0005829; P:GO:0006623; P:GO:0006888; P:GO:0006891; P:GO:0006896; C:GO:0012507; C:GO:0016021; C:GO:0031201; C:GO:0031902; P:GO:0042147; P:GO:0048280	F:SNARE binding; F:SNAP receptor activity; C:endoplasmic reticulum membrane; C:Golgi apparatus; C:cytosol; P:protein targeting to vacuole; P:ER to Golgi vesicle-mediated transport; P:intra-Golgi vesicle-mediated transport; P:Golgi to vacuole transport; C:ER to Golgi transport vesicle membrane; C:integral component of membrane; C:SNARE complex; C:late endosome membrane; P:retrograde transport, end…			G3DSA:1.20.5.110 (GENE3D); IPR007705 (PFAM); G3DSA:1.20.58.400 (GENE3D); PF12352 (PFAM); PTHR21230:SF52 (PANTHER); PTHR21230 (PANTHER); cd15862 (CDD); SSF58038 (SUPERFAMILY); IPR010989 (SUPERFAMILY)	P:GO:0006886; C:GO:0016020; P:GO:0016192	P:intracellular protein transport; C:membrane; P:vesicle-mediated transport
HY10038_c0_g1_i13	vesicle transport v-SNARE 12-like	3557	20	6.88986e-155	92.3						PTHR37178 (PANTHER)	no GO terms	no GO terms
HY10038_c0_g1_i14	hypothetical protein CICLE_v10032381mg	3354	20	1.44921e-155	91.9						PTHR37178 (PANTHER)	no GO terms	no GO terms
HY10038_c0_g1_i15	vesicle transport v-SNARE 12	3376	20	2.80354e-134	92.85	15	F:GO:0000149; F:GO:0005484; C:GO:0005789; C:GO:0005794; C:GO:0005829; P:GO:0006623; P:GO:0006888; P:GO:0006891; P:GO:0006896; C:GO:0012507; C:GO:0016021; C:GO:0031201; C:GO:0031902; P:GO:0042147; P:GO:0048280	F:SNARE binding; F:SNAP receptor activity; C:endoplasmic reticulum membrane; C:Golgi apparatus; C:cytosol; P:protein targeting to vacuole; P:ER to Golgi vesicle-mediated transport; P:intra-Golgi vesicle-mediated transport; P:Golgi to vacuole transport; C:ER to Golgi transport vesicle membrane; C:integral component of membrane; C:SNARE complex; C:late endosome membrane; P:retrograde transport, end…			PTHR37178 (PANTHER)	no GO terms	no GO terms
HY10038_c0_g1_i16	hypothetical protein CICLE_v10032381mg	3099	20	1.82249e-156	91.9						PTHR37178 (PANTHER)	no GO terms	no GO terms
HY10038_c0_g1_i17	hypothetical protein CISIN_1g023984mg	2831	20	1.14827e-44	90.3						PTHR37178 (PANTHER)	no GO terms	no GO terms
HY10038_c0_g1_i18	vesicle transport v-SNARE 12-like	4628	20	9.05168e-105	92.05	15	F:GO:0000149; F:GO:0005484; C:GO:0005789; C:GO:0005794; C:GO:0005829; P:GO:0006623; P:GO:0006888; P:GO:0006891; P:GO:0006896; C:GO:0012507; C:GO:0016021; C:GO:0031201; C:GO:0031902; P:GO:0042147; P:GO:0048280	F:SNARE binding; F:SNAP receptor activity; C:endoplasmic reticulum membrane; C:Golgi apparatus; C:cytosol; P:protein targeting to vacuole; P:ER to Golgi vesicle-mediated transport; P:intra-Golgi vesicle-mediated transport; P:Golgi to vacuole transport; C:ER to Golgi transport vesicle membrane; C:integral component of membrane; C:SNARE complex; C:late endosome membrane; P:retrograde transport, end…			G3DSA:1.20.5.110 (GENE3D); IPR007705 (PFAM); G3DSA:1.20.58.400 (GENE3D); PF12352 (PFAM); PTHR21230:SF52 (PANTHER); PTHR21230 (PANTHER); cd15862 (CDD); SSF58038 (SUPERFAMILY); IPR010989 (SUPERFAMILY)	P:GO:0006886; C:GO:0016020; P:GO:0016192	P:intracellular protein transport; C:membrane; P:vesicle-mediated transport
HY10038_c0_g1_i19	hypothetical protein CICLE_v10032381mg	1819	20	6.84165e-162	91.9						PTHR37178 (PANTHER)	no GO terms	no GO terms
HY10038_c0_g1_i2	vesicle transport v-SNARE 12	3302	20	9.67952e-156	93.45	6	F:GO:0005484; C:GO:0005794; P:GO:0006886; C:GO:0016021; P:GO:0016192; P:GO:0061025	F:SNAP receptor activity; C:Golgi apparatus; P:intracellular protein transport; C:integral component of membrane; P:vesicle-mediated transport; P:membrane fusion			PTHR37178 (PANTHER)	no GO terms	no GO terms
HY10038_c0_g1_i3	hypothetical protein CISIN_1g023984mg	4385	20	2.02798e-44	90.3						PTHR37178 (PANTHER)	no GO terms	no GO terms
HY10038_c0_g1_i4	DUF3110 domain-containing protein	2342	20	5.71609e-102	75.75						PTHR37178 (PANTHER)	no GO terms	no GO terms
HY10038_c0_g1_i5	hypothetical protein CICLE_v10032381mg	3173	20	6.58898e-135	90.8						PTHR37178 (PANTHER)	no GO terms	no GO terms
HY10038_c0_g1_i6	hypothetical protein CICLE_v10032381mg	3428	20	3.96425e-134	90.8						PTHR37178 (PANTHER)	no GO terms	no GO terms
HY10038_c0_g1_i7	hypothetical protein CICLE_v10032381mg	3214	20	4.80063e-156	91.9						PTHR37178 (PANTHER)	no GO terms	no GO terms
HY10038_c0_g1_i8	vesicle transport v-SNARE 12-like	313	20	5.40271e-43	90.7	15	F:GO:0000149; F:GO:0005484; C:GO:0005789; C:GO:0005794; C:GO:0005829; P:GO:0006623; P:GO:0006888; P:GO:0006891; P:GO:0006896; C:GO:0012507; C:GO:0016021; C:GO:0031201; C:GO:0031902; P:GO:0042147; P:GO:0048280	F:SNARE binding; F:SNAP receptor activity; C:endoplasmic reticulum membrane; C:Golgi apparatus; C:cytosol; P:protein targeting to vacuole; P:ER to Golgi vesicle-mediated transport; P:intra-Golgi vesicle-mediated transport; P:Golgi to vacuole transport; C:ER to Golgi transport vesicle membrane; C:integral component of membrane; C:SNARE complex; C:late endosome membrane; P:retrograde transport, end…			IPR007705 (PFAM); G3DSA:1.20.58.400 (GENE3D); PTHR21230:SF52 (PANTHER); PTHR21230 (PANTHER); IPR010989 (SUPERFAMILY)	P:GO:0006886; C:GO:0016020; P:GO:0016192	P:intracellular protein transport; C:membrane; P:vesicle-mediated transport
HY10038_c0_g1_i9	vesicle transport v-SNARE 12-like	3631	20	1.48947e-133	93.9	6	F:GO:0005484; C:GO:0005794; P:GO:0006886; C:GO:0016021; P:GO:0016192; P:GO:0061025	F:SNAP receptor activity; C:Golgi apparatus; P:intracellular protein transport; C:integral component of membrane; P:vesicle-mediated transport; P:membrane fusion			PTHR37178 (PANTHER)	no GO terms	no GO terms
HY10038_c0_g2_i1	cyclic nucleotide-gated ion channel 2-like	1011	20	3.6994e-117	78.25	9	F:GO:0005222; F:GO:0005242; F:GO:0005262; C:GO:0005622; P:GO:0007263; P:GO:0009626; C:GO:0016021; P:GO:0070509; P:GO:0070588	F:intracellular cAMP activated cation channel activity; F:inward rectifier potassium channel activity; F:calcium channel activity; C:intracellular; P:nitric oxide mediated signal transduction; P:plant-type hypersensitive response; C:integral component of membrane; P:calcium ion import; P:calcium ion transmembrane transport			PTHR10217 (PANTHER); PTHR10217:SF501 (PANTHER); SSF81324 (SUPERFAMILY)	no GO terms	no GO terms
HY10038_c0_g2_i10	cyclic nucleotide-gated ion channel 2	2371	20	0	81.9	7	F:GO:0005221; F:GO:0005249; C:GO:0005887; P:GO:0006816; P:GO:0042391; P:GO:0051716; P:GO:0071805	F:intracellular cyclic nucleotide activated cation channel activity; F:voltage-gated potassium channel activity; C:integral component of plasma membrane; P:calcium ion transport; P:regulation of membrane potential; P:cellular response to stimulus; P:potassium ion transmembrane transport			IPR014710 (G3DSA:2.60.120.GENE3D); G3DSA:1.10.287.70 (GENE3D); IPR005821 (PFAM); G3DSA:1.10.287.630 (GENE3D); PTHR10217 (PANTHER); PTHR10217:SF501 (PANTHER); IPR000595 (PROSITE_PROFILES); IPR000595 (CDD); SSF81324 (SUPERFAMILY); IPR018490 (SUPERFAMILY)	F:GO:0005216; P:GO:0006811; C:GO:0016020; P:GO:0055085	F:ion channel activity; P:ion transport; C:membrane; P:transmembrane transport
HY10038_c0_g2_i2	cyclic nucleotide-gated ion channel 2-like	680	20	9.67671e-62	84.85	9	F:GO:0005222; F:GO:0005242; F:GO:0005262; C:GO:0005622; P:GO:0007263; P:GO:0009626; C:GO:0016021; P:GO:0070509; P:GO:0070588	F:intracellular cAMP activated cation channel activity; F:inward rectifier potassium channel activity; F:calcium channel activity; C:intracellular; P:nitric oxide mediated signal transduction; P:plant-type hypersensitive response; C:integral component of membrane; P:calcium ion import; P:calcium ion transmembrane transport			PTHR10217:SF501 (PANTHER); PTHR10217 (PANTHER); SSF81324 (SUPERFAMILY)	no GO terms	no GO terms
HY10038_c0_g2_i3	cyclic nucleotide-gated ion channel 2	2371	20	0	82.4	7	F:GO:0005221; F:GO:0005249; C:GO:0005887; P:GO:0006816; P:GO:0042391; P:GO:0051716; P:GO:0071805	F:intracellular cyclic nucleotide activated cation channel activity; F:voltage-gated potassium channel activity; C:integral component of plasma membrane; P:calcium ion transport; P:regulation of membrane potential; P:cellular response to stimulus; P:potassium ion transmembrane transport			IPR005821 (PFAM); IPR014710 (G3DSA:2.60.120.GENE3D); G3DSA:1.10.287.70 (GENE3D); G3DSA:1.10.287.630 (GENE3D); PTHR10217 (PANTHER); PTHR10217:SF501 (PANTHER); IPR000595 (PROSITE_PROFILES); IPR000595 (CDD); SSF81324 (SUPERFAMILY); IPR018490 (SUPERFAMILY)	F:GO:0005216; P:GO:0006811; C:GO:0016020; P:GO:0055085	F:ion channel activity; P:ion transport; C:membrane; P:transmembrane transport
HY10038_c0_g2_i4	cyclic nucleotide-gated ion channel 2	2040	20	0	84.55	11	F:GO:0005222; F:GO:0005242; F:GO:0005262; C:GO:0005622; C:GO:0005887; P:GO:0007263; P:GO:0009626; P:GO:0042391; P:GO:0070509; P:GO:0070588; P:GO:0071805	F:intracellular cAMP activated cation channel activity; F:inward rectifier potassium channel activity; F:calcium channel activity; C:intracellular; C:integral component of plasma membrane; P:nitric oxide mediated signal transduction; P:plant-type hypersensitive response; P:regulation of membrane potential; P:calcium ion import; P:calcium ion transmembrane transport; P:potassium ion transmembrane …			G3DSA:1.10.287.630 (GENE3D); IPR005821 (PFAM); G3DSA:1.10.287.70 (GENE3D); IPR014710 (G3DSA:2.60.120.GENE3D); PTHR10217:SF501 (PANTHER); PTHR10217 (PANTHER); IPR000595 (PROSITE_PROFILES); IPR000595 (CDD); SSF81324 (SUPERFAMILY); IPR018490 (SUPERFAMILY)	F:GO:0005216; P:GO:0006811; C:GO:0016020; P:GO:0055085	F:ion channel activity; P:ion transport; C:membrane; P:transmembrane transport
HY10038_c0_g2_i5	cyclic nucleotide-gated ion channel 2	1145	20	1.56288e-115	75.9	9	F:GO:0005222; F:GO:0005242; F:GO:0005262; C:GO:0005622; P:GO:0007263; P:GO:0009626; C:GO:0016021; P:GO:0070509; P:GO:0070588	F:intracellular cAMP activated cation channel activity; F:inward rectifier potassium channel activity; F:calcium channel activity; C:intracellular; P:nitric oxide mediated signal transduction; P:plant-type hypersensitive response; C:integral component of membrane; P:calcium ion import; P:calcium ion transmembrane transport			PTHR10217 (PANTHER); PTHR10217:SF501 (PANTHER); SSF81324 (SUPERFAMILY)	no GO terms	no GO terms
HY10038_c0_g2_i6	cyclic nucleotide-gated ion channel 2	2487	20	0	82.2	7	F:GO:0005221; F:GO:0005249; C:GO:0005887; P:GO:0006816; P:GO:0042391; P:GO:0051716; P:GO:0071805	F:intracellular cyclic nucleotide activated cation channel activity; F:voltage-gated potassium channel activity; C:integral component of plasma membrane; P:calcium ion transport; P:regulation of membrane potential; P:cellular response to stimulus; P:potassium ion transmembrane transport			IPR014710 (G3DSA:2.60.120.GENE3D); G3DSA:1.10.287.70 (GENE3D); IPR005821 (PFAM); G3DSA:1.10.287.630 (GENE3D); PTHR10217 (PANTHER); PTHR10217:SF501 (PANTHER); IPR000595 (PROSITE_PROFILES); IPR000595 (CDD); SSF81324 (SUPERFAMILY); IPR018490 (SUPERFAMILY)	F:GO:0005216; P:GO:0006811; C:GO:0016020; P:GO:0055085	F:ion channel activity; P:ion transport; C:membrane; P:transmembrane transport
HY10038_c0_g2_i7	cyclic nucleotide-gated ion channel 2	1589	20	0	80.3	11	F:GO:0005222; F:GO:0005242; F:GO:0005262; C:GO:0005622; C:GO:0005887; P:GO:0007263; P:GO:0009626; P:GO:0042391; P:GO:0070509; P:GO:0070588; P:GO:0071805	F:intracellular cAMP activated cation channel activity; F:inward rectifier potassium channel activity; F:calcium channel activity; C:intracellular; C:integral component of plasma membrane; P:nitric oxide mediated signal transduction; P:plant-type hypersensitive response; P:regulation of membrane potential; P:calcium ion import; P:calcium ion transmembrane transport; P:potassium ion transmembrane …			G3DSA:1.10.287.630 (GENE3D); G3DSA:1.10.287.70 (GENE3D); IPR005821 (PFAM); PTHR10217:SF501 (PANTHER); PTHR10217 (PANTHER); SSF81324 (SUPERFAMILY); IPR018490 (SUPERFAMILY)	F:GO:0005216; P:GO:0006811; C:GO:0016020; P:GO:0055085	F:ion channel activity; P:ion transport; C:membrane; P:transmembrane transport
HY10038_c0_g2_i8	cyclic nucleotide-gated ion channel 2	2505	20	0	82.8	7	F:GO:0005221; F:GO:0005249; C:GO:0005887; P:GO:0006816; P:GO:0042391; P:GO:0051716; P:GO:0071805	F:intracellular cyclic nucleotide activated cation channel activity; F:voltage-gated potassium channel activity; C:integral component of plasma membrane; P:calcium ion transport; P:regulation of membrane potential; P:cellular response to stimulus; P:potassium ion transmembrane transport			G3DSA:1.10.287.70 (GENE3D); IPR005821 (PFAM); G3DSA:1.10.287.630 (GENE3D); IPR014710 (G3DSA:2.60.120.GENE3D); PTHR10217:SF501 (PANTHER); PTHR10217 (PANTHER); IPR000595 (PROSITE_PROFILES); IPR000595 (CDD); IPR018490 (SUPERFAMILY); SSF81324 (SUPERFAMILY)	F:GO:0005216; P:GO:0006811; C:GO:0016020; P:GO:0055085	F:ion channel activity; P:ion transport; C:membrane; P:transmembrane transport
HY10038_c0_g2_i9	cyclic nucleotide-gated ion channel 2	1127	20	9.02334e-117	78.8	9	F:GO:0005222; F:GO:0005242; F:GO:0005262; C:GO:0005622; P:GO:0007263; P:GO:0009626; C:GO:0016021; P:GO:0070509; P:GO:0070588	F:intracellular cAMP activated cation channel activity; F:inward rectifier potassium channel activity; F:calcium channel activity; C:intracellular; P:nitric oxide mediated signal transduction; P:plant-type hypersensitive response; C:integral component of membrane; P:calcium ion import; P:calcium ion transmembrane transport			PTHR10217 (PANTHER); PTHR10217:SF501 (PANTHER); SSF81324 (SUPERFAMILY)	no GO terms	no GO terms
HY10039_c0_g1_i1	galacturonosyltransferase 8-like	2993	20	4.8827e-49	51.85	5	C:GO:0016020; F:GO:0016757; P:GO:0045489; P:GO:0071555; C:GO:0098791	C:membrane; F:transferase activity, transferring glycosyl groups; P:pectin biosynthetic process; P:cell wall organization; C:Golgi subcompartment			no IPS match	no IPS match	no IPS match
HY10039_c0_g1_i10	galacturonosyltransferase 8-like	1395	20	3.61111e-37	76.95	4	C:GO:0005794; P:GO:0009987; C:GO:0016020; F:GO:0016757	C:Golgi apparatus; P:cellular process; C:membrane; F:transferase activity, transferring glycosyl groups			no IPS match	no IPS match	no IPS match
HY10039_c0_g1_i11	galacturonosyltransferase 8-like	2109	20	9.69563e-40	70.45	4	C:GO:0005794; P:GO:0009987; C:GO:0016020; F:GO:0016757	C:Golgi apparatus; P:cellular process; C:membrane; F:transferase activity, transferring glycosyl groups			no IPS match	no IPS match	no IPS match
HY10039_c0_g1_i12	galacturonosyltransferase 8-like	807	20	8.5213e-27	76.85	4	C:GO:0005794; P:GO:0009987; C:GO:0016020; F:GO:0047262	C:Golgi apparatus; P:cellular process; C:membrane; F:polygalacturonate 4-alpha-galacturonosyltransferase activity			IPR002495 (PFAM); PTHR32116:SF19 (PANTHER); IPR029993 (PANTHER)	F:GO:0016757; F:GO:0047262	F:transferase activity, transferring glycosyl groups; F:polygalacturonate 4-alpha-galacturonosyltransferase activity
HY10039_c0_g1_i13	probable galacturonosyltransferase 9	447	20	7.51388e-11	77	7	C:GO:0000139; C:GO:0005739; C:GO:0005768; C:GO:0005802; P:GO:0010289; C:GO:0016021; F:GO:0047262	C:Golgi membrane; C:mitochondrion; C:endosome; C:trans-Golgi network; P:homogalacturonan biosynthetic process; C:integral component of membrane; F:polygalacturonate 4-alpha-galacturonosyltransferase activity	EC:2.4.1.43	Polygalacturonate 4-alpha-galacturonosyltransferase	no IPS match	no IPS match	no IPS match
HY10039_c0_g1_i14	hypothetical protein CICLE_v10029037mg	242	1	5.09196e-05	95						no IPS match	no IPS match	no IPS match
HY10039_c0_g1_i15	---NA---	1504									no IPS match	no IPS match	no IPS match
HY10039_c0_g1_i16	galacturonosyltransferase 8-like	2757	20	8.29819e-37	76.95	4	C:GO:0005794; P:GO:0009987; C:GO:0016020; F:GO:0016757	C:Golgi apparatus; P:cellular process; C:membrane; F:transferase activity, transferring glycosyl groups			no IPS match	no IPS match	no IPS match
HY10039_c0_g1_i17	galacturonosyltransferase 8-like	2184	20	1.01237e-39	70.45	4	C:GO:0005794; P:GO:0009987; C:GO:0016020; F:GO:0016757	C:Golgi apparatus; P:cellular process; C:membrane; F:transferase activity, transferring glycosyl groups			no IPS match	no IPS match	no IPS match
HY10039_c0_g1_i18	galacturonosyltransferase 8-like	2276	20	3.56964e-49	51.85	5	C:GO:0016020; F:GO:0016757; P:GO:0045489; P:GO:0071555; C:GO:0098791	C:membrane; F:transferase activity, transferring glycosyl groups; P:pectin biosynthetic process; P:cell wall organization; C:Golgi subcompartment			no IPS match	no IPS match	no IPS match
HY10039_c0_g1_i2	COBW domain-containing protein 1	787	20	3.95234e-07	76.1						no IPS match	no IPS match	no IPS match
HY10039_c0_g1_i3	---NA---	482									no IPS match	no IPS match	no IPS match
HY10039_c0_g1_i4	S-adenosyl-L-homocysteine hydrolase	1058	20	2.89389e-07	98	5	F:GO:0004013; P:GO:0006730; F:GO:0016787; P:GO:0019510; F:GO:0051287	F:adenosylhomocysteinase activity; P:one-carbon metabolic process; F:hydrolase activity; P:S-adenosylhomocysteine catabolic process; F:NAD binding			no IPS match	no IPS match	no IPS match
HY10039_c0_g1_i5	galacturonosyltransferase 8-like	2832	20	8.56327e-37	73.45	4	C:GO:0005794; P:GO:0009987; C:GO:0016020; F:GO:0047262	C:Golgi apparatus; P:cellular process; C:membrane; F:polygalacturonate 4-alpha-galacturonosyltransferase activity			IPR002495 (PFAM); IPR029993 (PANTHER); PTHR32116:SF19 (PANTHER)	F:GO:0016757; F:GO:0047262	F:transferase activity, transferring glycosyl groups; F:polygalacturonate 4-alpha-galacturonosyltransferase activity
HY10039_c0_g1_i6	hypothetical protein CICLE_v10029037mg	309	1	0.000106089	95						no IPS match	no IPS match	no IPS match
HY10039_c0_g1_i7	galacturonosyltransferase 8-like	2201	20	3.42682e-49	51.85	5	C:GO:0016020; F:GO:0016757; P:GO:0045489; P:GO:0071555; C:GO:0098791	C:membrane; F:transferase activity, transferring glycosyl groups; P:pectin biosynthetic process; P:cell wall organization; C:Golgi subcompartment			no IPS match	no IPS match	no IPS match
HY10039_c0_g1_i8	---NA---	393									no IPS match	no IPS match	no IPS match
HY10039_c0_g1_i9	COBW domain-containing protein 1	240	20	1.00188e-08	83						no IPS match	no IPS match	no IPS match
HY10039_c0_g2_i1	serine/threonine-protein kinase HT1-like	556	20	8.06669e-10	86.75	6	F:GO:0004674; F:GO:0004871; F:GO:0005524; C:GO:0005622; P:GO:0006468; P:GO:0035556	F:protein serine/threonine kinase activity; F:signal transducer activity; F:ATP binding; C:intracellular; P:protein phosphorylation; P:intracellular signal transduction	EC:2.7.11	Transferring phosphorus-containing groups	no IPS match	no IPS match	no IPS match
HY10039_c0_g2_i2	serine/threonine-protein kinase HT1-like	577	20	7.86223e-10	90.35	6	F:GO:0004674; F:GO:0004871; F:GO:0005524; C:GO:0005622; P:GO:0006468; P:GO:0035556	F:protein serine/threonine kinase activity; F:signal transducer activity; F:ATP binding; C:intracellular; P:protein phosphorylation; P:intracellular signal transduction	EC:2.7.11	Transferring phosphorus-containing groups	no IPS match	no IPS match	no IPS match
HY10039_c0_g3_i1	COBW domain-containing protein 1	694	20	8.80645e-08	92.95						no IPS match	no IPS match	no IPS match
HY1004_c0_g1_i1	---NA---	388									mobidb-lite (MOBIDB_LITE)	no GO terms	no GO terms
HY10040_c1_g1_i1	V-type proton ATPase subunit D	1813	20	0	95.35	2	F:GO:0042626; P:GO:0055085	F:ATPase activity, coupled to transmembrane movement of substances; P:transmembrane transport	EC:3.6.1.3; EC:3.6.1.15	Adenosinetriphosphatase; Nucleoside-triphosphate phosphatase	IPR002699 (TIGRFAM); IPR002699 (PFAM); IPR002699 (PANTHER)	F:GO:0042626	F:ATPase activity, coupled to transmembrane movement of substances
HY10040_c1_g1_i2	V-type proton ATPase subunit D	1551	20	0	95.35	2	F:GO:0042626; P:GO:0055085	F:ATPase activity, coupled to transmembrane movement of substances; P:transmembrane transport	EC:3.6.1.3; EC:3.6.1.15	Adenosinetriphosphatase; Nucleoside-triphosphate phosphatase	IPR002699 (TIGRFAM); IPR002699 (PFAM); IPR002699 (PANTHER)	F:GO:0042626	F:ATPase activity, coupled to transmembrane movement of substances
HY10040_c2_g1_i1	protein PHLOEM PROTEIN 2-LIKE A1-like	496	20	2.95066e-30	75.4	1	C:GO:0016021	C:integral component of membrane			no IPS match	no IPS match	no IPS match
HY10040_c2_g1_i2	---NA---	203									no IPS match	no IPS match	no IPS match
HY10040_c2_g1_i3	---NA---	957									no IPS match	no IPS match	no IPS match
HY10040_c2_g2_i1	---NA---	203									no IPS match	no IPS match	no IPS match
HY10040_c2_g2_i10	---NA---	687									PS51257 (PROSITE_PROFILES)	no GO terms	no GO terms
HY10040_c2_g2_i11	PREDICTED: uncharacterized protein LOC107175284, partial	307	3	1.49419e-08	48.33						no IPS match	no IPS match	no IPS match
HY10040_c2_g2_i2	hypothetical protein CICLE_v10017066mg	796	3	5.51519e-07	56.67						no IPS match	no IPS match	no IPS match
HY10040_c2_g2_i3	---NA---	329									no IPS match	no IPS match	no IPS match
HY10040_c2_g2_i4	PREDICTED: uncharacterized protein LOC107175284, partial	488	3	2.31139e-21	60						no IPS match	no IPS match	no IPS match
HY10040_c2_g2_i5	hypothetical protein CICLE_v10017066mg	444	1	1.35683e-09	64						no IPS match	no IPS match	no IPS match
HY10040_c2_g2_i6	---NA---	311									mobidb-lite (MOBIDB_LITE)	no GO terms	no GO terms
HY10040_c2_g2_i7	hypothetical protein CICLE_v10017066mg	457	1	6.26859e-07	64						no IPS match	no IPS match	no IPS match
HY10040_c2_g2_i8	---NA---	255									mobidb-lite (MOBIDB_LITE)	no GO terms	no GO terms
HY10040_c2_g2_i9	hypothetical protein CICLE_v10007097mg, partial	371	1	1.34467e-07	89	1	C:GO:0016021	C:integral component of membrane			no IPS match	no IPS match	no IPS match
HY10040_c2_g3_i1	hypothetical protein CICLE_v10007097mg, partial	528	1	5.40053e-10	89	1	C:GO:0016021	C:integral component of membrane			no IPS match	no IPS match	no IPS match
HY10040_c2_g3_i2	hypothetical protein CICLE_v10007097mg, partial	534	1	5.64648e-10	89	1	C:GO:0016021	C:integral component of membrane			no IPS match	no IPS match	no IPS match
HY10040_c2_g3_i3	hypothetical protein CICLE_v10017066mg	477	3	3.18609e-06	60						no IPS match	no IPS match	no IPS match
HY10040_c2_g3_i4	hypothetical protein CICLE_v10017066mg	422	3	1.97528e-06	56.67						no IPS match	no IPS match	no IPS match
HY10040_c2_g3_i5	hypothetical protein CICLE_v10007097mg, partial	557	1	7.51472e-10	89	1	C:GO:0016021	C:integral component of membrane			no IPS match	no IPS match	no IPS match
HY10040_c2_g4_i1	hypothetical protein CICLE_v10027627mg	348	2	7.61565e-11	77						no IPS match	no IPS match	no IPS match
HY10040_c2_g4_i2	hypothetical protein CICLE_v10027627mg	360	2	6.87042e-11	77						no IPS match	no IPS match	no IPS match
HY10040_c2_g4_i3	hypothetical protein CICLE_v10027627mg	460	5	6.01242e-14	54.6						mobidb-lite (MOBIDB_LITE)	no GO terms	no GO terms
HY10040_c2_g4_i4	hypothetical protein CICLE_v10006236mg	248	3	2.49906e-06	63.67						no IPS match	no IPS match	no IPS match
HY10040_c2_g4_i5	hypothetical protein CICLE_v10027627mg	369	4	3.9228e-12	67.75						mobidb-lite (MOBIDB_LITE)	no GO terms	no GO terms
HY10040_c2_g4_i6	hypothetical protein CICLE_v10006236mg	276	1	1.02466e-05	61						IPR013083 (G3DSA:3.30.40.GENE3D)	no GO terms	no GO terms
HY10040_c2_g5_i1	PREDICTED: uncharacterized protein LOC107176070	227	1	9.74448e-05	62						no IPS match	no IPS match	no IPS match
HY10040_c2_g5_i2	hypothetical protein CICLE_v10006236mg	574	1	6.77079e-31	99						no IPS match	no IPS match	no IPS match
HY10040_c2_g5_i3	hypothetical protein CICLE_v10006236mg	517	1	1.24852e-06	100						no IPS match	no IPS match	no IPS match
HY10040_c2_g5_i4	hypothetical protein CICLE_v10006236mg	519	2	1.66856e-06	76						no IPS match	no IPS match	no IPS match
HY10040_c2_g6_i1	---NA---	429									no IPS match	no IPS match	no IPS match
HY10040_c3_g1_i1	---NA---	279									no IPS match	no IPS match	no IPS match
HY10041_c0_g1_i1	ABC transporter B family member 29, chloroplastic	3440	20	0	85.4	4	F:GO:0005524; C:GO:0016021; F:GO:0042626; P:GO:0055085	F:ATP binding; C:integral component of membrane; F:ATPase activity, coupled to transmembrane movement of substances; P:transmembrane transport	EC:3.6.1.3; EC:3.6.1.15	Adenosinetriphosphatase; Nucleoside-triphosphate phosphatase	G3DSA:3.40.50.300 (GENE3D); IPR036640 (G3DSA:1.20.1560.GENE3D); IPR003439 (PFAM); IPR011527 (PFAM); PTHR24221 (PANTHER); PTHR24221:SF112 (PANTHER); IPR011527 (PROSITE_PROFILES); IPR027417 (SUPERFAMILY); IPR036640 (SUPERFAMILY)	F:GO:0005524; C:GO:0016021; F:GO:0016887; F:GO:0042626; P:GO:0055085	F:ATP binding; C:integral component of membrane; F:ATPase activity; F:ATPase activity, coupled to transmembrane movement of substances; P:transmembrane transport
HY10041_c0_g1_i10	ABC transporter B family member 29, chloroplastic	1744	20	2.17019e-87	91.35	5	F:GO:0005524; C:GO:0009941; C:GO:0016021; F:GO:0042626; P:GO:0055085	F:ATP binding; C:chloroplast envelope; C:integral component of membrane; F:ATPase activity, coupled to transmembrane movement of substances; P:transmembrane transport	EC:3.6.1.3; EC:3.6.1.15	Adenosinetriphosphatase; Nucleoside-triphosphate phosphatase	IPR003439 (PFAM); G3DSA:3.40.50.300 (GENE3D); PTHR24221 (PANTHER); PTHR24221:SF112 (PANTHER); IPR027417 (SUPERFAMILY)	F:GO:0005524; F:GO:0016887	F:ATP binding; F:ATPase activity
HY10041_c0_g1_i11	ABC transporter B family member 29, chloroplastic	1372	20	1.68189e-143	86.05	5	F:GO:0005524; C:GO:0009941; C:GO:0016021; F:GO:0042626; P:GO:0055085	F:ATP binding; C:chloroplast envelope; C:integral component of membrane; F:ATPase activity, coupled to transmembrane movement of substances; P:transmembrane transport	EC:3.6.1.3; EC:3.6.1.15	Adenosinetriphosphatase; Nucleoside-triphosphate phosphatase	G3DSA:3.40.50.300 (GENE3D); IPR003439 (PFAM); mobidb-lite (MOBIDB_LITE); PTHR24221:SF112 (PANTHER); PTHR24221 (PANTHER); IPR027417 (SUPERFAMILY)	F:GO:0005524; F:GO:0016887	F:ATP binding; F:ATPase activity
HY10041_c0_g1_i12	ABC transporter B family member 29, chloroplastic	2915	20	0	87.05	5	F:GO:0005524; C:GO:0009941; C:GO:0016021; F:GO:0042626; P:GO:0055085	F:ATP binding; C:chloroplast envelope; C:integral component of membrane; F:ATPase activity, coupled to transmembrane movement of substances; P:transmembrane transport	EC:3.6.1.3; EC:3.6.1.15	Adenosinetriphosphatase; Nucleoside-triphosphate phosphatase	IPR036640 (G3DSA:1.20.1560.GENE3D); G3DSA:3.40.50.300 (GENE3D); IPR003439 (PFAM); PTHR24221 (PANTHER); PTHR24221:SF112 (PANTHER); IPR011527 (PROSITE_PROFILES); IPR003439 (PROSITE_PROFILES); IPR027417 (SUPERFAMILY); IPR036640 (SUPERFAMILY)	F:GO:0005524; C:GO:0016021; F:GO:0016887; F:GO:0042626; P:GO:0055085	F:ATP binding; C:integral component of membrane; F:ATPase activity; F:ATPase activity, coupled to transmembrane movement of substances; P:transmembrane transport
HY10041_c0_g1_i13	ABC transporter B family member 29, chloroplastic	2854	20	0	81.8	4	F:GO:0005524; C:GO:0016021; F:GO:0042626; P:GO:0055085	F:ATP binding; C:integral component of membrane; F:ATPase activity, coupled to transmembrane movement of substances; P:transmembrane transport	EC:3.6.1.3; EC:3.6.1.15	Adenosinetriphosphatase; Nucleoside-triphosphate phosphatase	IPR011527 (PFAM); IPR036640 (G3DSA:1.20.1560.GENE3D); PTHR24221:SF112 (PANTHER); PTHR24221 (PANTHER); IPR011527 (PROSITE_PROFILES); IPR036640 (SUPERFAMILY)	F:GO:0005524; C:GO:0016021; F:GO:0042626; P:GO:0055085	F:ATP binding; C:integral component of membrane; F:ATPase activity, coupled to transmembrane movement of substances; P:transmembrane transport
HY10041_c0_g1_i14	ABC transporter B family member 29, chloroplastic	3603	20	0	83.35	4	F:GO:0005524; C:GO:0016021; F:GO:0042626; P:GO:0055085	F:ATP binding; C:integral component of membrane; F:ATPase activity, coupled to transmembrane movement of substances; P:transmembrane transport	EC:3.6.1.3; EC:3.6.1.15	Adenosinetriphosphatase; Nucleoside-triphosphate phosphatase	IPR036640 (G3DSA:1.20.1560.GENE3D); PTHR24221 (PANTHER); PTHR24221:SF112 (PANTHER); IPR011527 (PROSITE_PROFILES); IPR036640 (SUPERFAMILY)	F:GO:0005524; C:GO:0016021; F:GO:0042626; P:GO:0055085	F:ATP binding; C:integral component of membrane; F:ATPase activity, coupled to transmembrane movement of substances; P:transmembrane transport
HY10041_c0_g1_i15	ABC transporter B family member 29, chloroplastic-like	789	20	4.61029e-107	77.35	4	F:GO:0005524; C:GO:0016021; F:GO:0042626; P:GO:0055085	F:ATP binding; C:integral component of membrane; F:ATPase activity, coupled to transmembrane movement of substances; P:transmembrane transport	EC:3.6.1.3; EC:3.6.1.15	Adenosinetriphosphatase; Nucleoside-triphosphate phosphatase	IPR036640 (G3DSA:1.20.1560.GENE3D); IPR011527 (PFAM); PTHR24221 (PANTHER); PTHR24221:SF112 (PANTHER); IPR011527 (PROSITE_PROFILES); IPR036640 (SUPERFAMILY)	F:GO:0005524; C:GO:0016021; F:GO:0042626; P:GO:0055085	F:ATP binding; C:integral component of membrane; F:ATPase activity, coupled to transmembrane movement of substances; P:transmembrane transport
HY10041_c0_g1_i16	ABC transporter B family member 29, chloroplastic	2803	20	0	84.15	4	F:GO:0005524; C:GO:0016021; F:GO:0042626; P:GO:0055085	F:ATP binding; C:integral component of membrane; F:ATPase activity, coupled to transmembrane movement of substances; P:transmembrane transport	EC:3.6.1.3; EC:3.6.1.15	Adenosinetriphosphatase; Nucleoside-triphosphate phosphatase	IPR011527 (PFAM); G3DSA:3.40.50.300 (GENE3D); IPR036640 (G3DSA:1.20.1560.GENE3D); IPR003439 (PFAM); PTHR24221 (PANTHER); PTHR24221:SF112 (PANTHER); IPR011527 (PROSITE_PROFILES); IPR003439 (PROSITE_PROFILES); IPR027417 (SUPERFAMILY); IPR036640 (SUPERFAMILY)	F:GO:0005524; C:GO:0016021; F:GO:0016887; F:GO:0042626; P:GO:0055085	F:ATP binding; C:integral component of membrane; F:ATPase activity; F:ATPase activity, coupled to transmembrane movement of substances; P:transmembrane transport
HY10041_c0_g1_i17	ABC transporter B family member 29, chloroplastic	2009	20	4.16916e-67	92.15	10	F:GO:0003924; F:GO:0005524; F:GO:0005525; P:GO:0006614; F:GO:0008312; C:GO:0009941; C:GO:0016021; F:GO:0042626; C:GO:0048500; P:GO:0055085	F:GTPase activity; F:ATP binding; F:GTP binding; P:SRP-dependent cotranslational protein targeting to membrane; F:7S RNA binding; C:chloroplast envelope; C:integral component of membrane; F:ATPase activity, coupled to transmembrane movement of substances; C:signal recognition particle; P:transmembrane transport	EC:3.6.1.3; EC:3.6.1.15	Adenosinetriphosphatase; Nucleoside-triphosphate phosphatase	G3DSA:3.40.50.300 (GENE3D); IPR003439 (PFAM); PTHR24221 (PANTHER); PTHR24221:SF112 (PANTHER); IPR027417 (SUPERFAMILY)	F:GO:0005524; F:GO:0016887	F:ATP binding; F:ATPase activity
HY10041_c0_g1_i2	ABC transporter B family member 29, chloroplastic	2966	20	0	83.75	5	F:GO:0005524; C:GO:0009941; C:GO:0016021; F:GO:0042626; P:GO:0055085	F:ATP binding; C:chloroplast envelope; C:integral component of membrane; F:ATPase activity, coupled to transmembrane movement of substances; P:transmembrane transport	EC:3.6.1.3; EC:3.6.1.15	Adenosinetriphosphatase; Nucleoside-triphosphate phosphatase	IPR003439 (PFAM); G3DSA:3.40.50.300 (GENE3D); PTHR24221:SF112 (PANTHER); PTHR24221 (PANTHER); IPR003439 (PROSITE_PROFILES); IPR027417 (SUPERFAMILY)	F:GO:0005524; F:GO:0016887	F:ATP binding; F:ATPase activity
HY10041_c0_g1_i3	ABC transporter B family member 29, chloroplastic	3491	20	0	82.15	4	F:GO:0005524; C:GO:0016021; F:GO:0042626; P:GO:0055085	F:ATP binding; C:integral component of membrane; F:ATPase activity, coupled to transmembrane movement of substances; P:transmembrane transport	EC:3.6.1.3; EC:3.6.1.15	Adenosinetriphosphatase; Nucleoside-triphosphate phosphatase	IPR011527 (PFAM); IPR036640 (G3DSA:1.20.1560.GENE3D); PTHR24221:SF112 (PANTHER); PTHR24221 (PANTHER); IPR011527 (PROSITE_PROFILES); IPR036640 (SUPERFAMILY)	F:GO:0005524; C:GO:0016021; F:GO:0042626; P:GO:0055085	F:ATP binding; C:integral component of membrane; F:ATPase activity, coupled to transmembrane movement of substances; P:transmembrane transport
HY10041_c0_g1_i4	ABC transporter B family member 29, chloroplastic	1122	20	4.7489e-21	88.85	5	F:GO:0005524; C:GO:0016021; C:GO:0031969; F:GO:0042626; P:GO:0055085	F:ATP binding; C:integral component of membrane; C:chloroplast membrane; F:ATPase activity, coupled to transmembrane movement of substances; P:transmembrane transport	EC:3.6.1.3; EC:3.6.1.15	Adenosinetriphosphatase; Nucleoside-triphosphate phosphatase	G3DSA:3.40.50.300 (GENE3D); PTHR24221:SF112 (PANTHER); PTHR24221 (PANTHER); IPR027417 (SUPERFAMILY)	no GO terms	no GO terms
HY10041_c0_g1_i5	ABC transporter B family member 29, chloroplastic-like	460	20	8.27264e-88	91.35	5	F:GO:0005524; C:GO:0009941; C:GO:0016021; F:GO:0042626; P:GO:0055085	F:ATP binding; C:chloroplast envelope; C:integral component of membrane; F:ATPase activity, coupled to transmembrane movement of substances; P:transmembrane transport	EC:3.6.1.3; EC:3.6.1.15	Adenosinetriphosphatase; Nucleoside-triphosphate phosphatase	G3DSA:3.40.50.300 (GENE3D); IPR003439 (PFAM); PTHR24221:SF112 (PANTHER); PTHR24221 (PANTHER); IPR027417 (SUPERFAMILY)	F:GO:0005524; F:GO:0016887	F:ATP binding; F:ATPase activity
HY10041_c0_g1_i6	ABC transporter B family member 29, chloroplastic-like	725	20	5.88903e-69	91.45	10	F:GO:0003924; F:GO:0005524; F:GO:0005525; P:GO:0006614; F:GO:0008312; C:GO:0009941; C:GO:0016021; F:GO:0042626; C:GO:0048500; P:GO:0055085	F:GTPase activity; F:ATP binding; F:GTP binding; P:SRP-dependent cotranslational protein targeting to membrane; F:7S RNA binding; C:chloroplast envelope; C:integral component of membrane; F:ATPase activity, coupled to transmembrane movement of substances; C:signal recognition particle; P:transmembrane transport	EC:3.6.1.3; EC:3.6.1.15	Adenosinetriphosphatase; Nucleoside-triphosphate phosphatase	IPR003439 (PFAM); G3DSA:3.40.50.300 (GENE3D); PTHR24221 (PANTHER); PTHR24221:SF112 (PANTHER); IPR027417 (SUPERFAMILY)	F:GO:0005524; F:GO:0016887	F:ATP binding; F:ATPase activity
HY10041_c0_g1_i7	ABC transporter B family member 29, chloroplastic	1107	20	4.49382e-165	86.35	5	F:GO:0005524; C:GO:0009941; C:GO:0016021; F:GO:0042626; P:GO:0055085	F:ATP binding; C:chloroplast envelope; C:integral component of membrane; F:ATPase activity, coupled to transmembrane movement of substances; P:transmembrane transport	EC:3.6.1.3; EC:3.6.1.15	Adenosinetriphosphatase; Nucleoside-triphosphate phosphatase	G3DSA:3.40.50.300 (GENE3D); IPR003439 (PFAM); mobidb-lite (MOBIDB_LITE); PTHR24221 (PANTHER); PTHR24221:SF112 (PANTHER); IPR027417 (SUPERFAMILY)	F:GO:0005524; F:GO:0016887	F:ATP binding; F:ATPase activity
HY10041_c0_g1_i8	ABC transporter B family member 29, chloroplastic	665	20	1.55844e-92	91.35	5	F:GO:0005524; C:GO:0009941; C:GO:0016021; F:GO:0042626; P:GO:0055085	F:ATP binding; C:chloroplast envelope; C:integral component of membrane; F:ATPase activity, coupled to transmembrane movement of substances; P:transmembrane transport	EC:3.6.1.3; EC:3.6.1.15	Adenosinetriphosphatase; Nucleoside-triphosphate phosphatase	IPR003439 (PFAM); G3DSA:3.40.50.300 (GENE3D); PTHR24221 (PANTHER); PTHR24221:SF112 (PANTHER); IPR027417 (SUPERFAMILY)	F:GO:0005524; F:GO:0016887	F:ATP binding; F:ATPase activity
HY10041_c0_g1_i9	ABC transporter B family member 29, chloroplastic	930	20	2.51598e-71	91.7	10	F:GO:0003924; F:GO:0005524; F:GO:0005525; P:GO:0006614; F:GO:0008312; C:GO:0009941; C:GO:0016021; F:GO:0042626; C:GO:0048500; P:GO:0055085	F:GTPase activity; F:ATP binding; F:GTP binding; P:SRP-dependent cotranslational protein targeting to membrane; F:7S RNA binding; C:chloroplast envelope; C:integral component of membrane; F:ATPase activity, coupled to transmembrane movement of substances; C:signal recognition particle; P:transmembrane transport	EC:3.6.1.3; EC:3.6.1.15	Adenosinetriphosphatase; Nucleoside-triphosphate phosphatase	G3DSA:3.40.50.300 (GENE3D); IPR003439 (PFAM); PTHR24221 (PANTHER); PTHR24221:SF112 (PANTHER); IPR027417 (SUPERFAMILY)	F:GO:0005524; F:GO:0016887	F:ATP binding; F:ATPase activity
HY10042_c0_g1_i1	bromodomain-containing protein DDB_G0270170-like	2140	20	0	74.95	1	F:GO:0003677	F:DNA binding			mobidb-lite (MOBIDB_LITE); mobidb-lite (MOBIDB_LITE); PTHR22881 (PANTHER); PTHR22881:SF16 (PANTHER)	no GO terms	no GO terms
HY10042_c0_g1_i2	bromodomain-containing protein DDB_G0270170-like	3273	20	0	78.1	1	F:GO:0005515	F:protein binding			IPR036427 (G3DSA:1.20.920.GENE3D); mobidb-lite (MOBIDB_LITE); mobidb-lite (MOBIDB_LITE); mobidb-lite (MOBIDB_LITE); PTHR22881 (PANTHER); PTHR22881:SF16 (PANTHER); IPR036427 (SUPERFAMILY)	F:GO:0005515	F:protein binding
HY10042_c0_g1_i3	bromodomain-containing protein DDB_G0270170-like	2554	20	0	75.25	1	F:GO:0003677	F:DNA binding			mobidb-lite (MOBIDB_LITE); mobidb-lite (MOBIDB_LITE); PTHR22881 (PANTHER); PTHR22881:SF16 (PANTHER)	no GO terms	no GO terms
HY10042_c0_g1_i4	bromodomain-containing protein DDB_G0270170-like	3108	20	0	78.05	1	F:GO:0005515	F:protein binding			IPR036427 (G3DSA:1.20.920.GENE3D); mobidb-lite (MOBIDB_LITE); mobidb-lite (MOBIDB_LITE); mobidb-lite (MOBIDB_LITE); PTHR22881:SF16 (PANTHER); PTHR22881 (PANTHER); IPR036427 (SUPERFAMILY)	F:GO:0005515	F:protein binding
HY10042_c0_g1_i5	bromodomain-containing protein DDB_G0270170-like	2523	20	0	78.3	1	F:GO:0005515	F:protein binding			IPR001487 (PRINTS); IPR036427 (G3DSA:1.20.920.GENE3D); IPR001487 (PFAM); mobidb-lite (MOBIDB_LITE); mobidb-lite (MOBIDB_LITE); mobidb-lite (MOBIDB_LITE); PTHR22881 (PANTHER); PTHR22881:SF16 (PANTHER); IPR001487 (PROSITE_PROFILES); cd04369 (CDD); IPR036427 (SUPERFAMILY)	F:GO:0005515	F:protein binding
HY10042_c0_g1_i6	bromodomain-containing protein DDB_G0270170-like	2642	20	0	75.85	1	F:GO:0016740	F:transferase activity			mobidb-lite (MOBIDB_LITE); mobidb-lite (MOBIDB_LITE); PTHR22881 (PANTHER); PTHR22881:SF16 (PANTHER)	no GO terms	no GO terms
HY10042_c0_g1_i7	bromodomain-containing protein DDB_G0270170-like	3706	20	0	78.1	1	F:GO:0005515	F:protein binding			IPR036427 (G3DSA:1.20.920.GENE3D); mobidb-lite (MOBIDB_LITE); mobidb-lite (MOBIDB_LITE); mobidb-lite (MOBIDB_LITE); PTHR22881 (PANTHER); PTHR22881:SF16 (PANTHER); IPR036427 (SUPERFAMILY)	F:GO:0005515	F:protein binding
HY10043_c0_g1_i1	2-C-methyl-D-erythritol 4-phosphate cytidylyltransferase, chloroplastic isoform X3	1771	20	5.51347e-173	90.1	2	P:GO:0008299; F:GO:0050518	P:isoprenoid biosynthetic process; F:2-C-methyl-D-erythritol 4-phosphate cytidylyltransferase activity	EC:2.7.7.60	2-C-methyl-D-erythritol 4-phosphate cytidylyltransferase	IPR029044 (G3DSA:3.90.550.GENE3D); IPR034683 (PFAM); IPR001228 (TIGRFAM); PTHR32125 (PANTHER); PTHR32125:SF4 (PANTHER); IPR001228 (HAMAP); IPR034683 (CDD); IPR029044 (SUPERFAMILY)	P:GO:0008299; F:GO:0050518; F:GO:0070567	P:isoprenoid biosynthetic process; F:2-C-methyl-D-erythritol 4-phosphate cytidylyltransferase activity; F:cytidylyltransferase activity
HY10043_c0_g1_i10	2-C-methyl-D-erythritol 4-phosphate cytidylyltransferase	1723	20	7.18528e-178	86	2	P:GO:0008299; F:GO:0050518	P:isoprenoid biosynthetic process; F:2-C-methyl-D-erythritol 4-phosphate cytidylyltransferase activity	EC:2.7.7.60	2-C-methyl-D-erythritol 4-phosphate cytidylyltransferase	IPR034683 (PFAM); IPR029044 (G3DSA:3.90.550.GENE3D); IPR001228 (TIGRFAM); PTHR32125:SF4 (PANTHER); PTHR32125 (PANTHER); IPR034683 (CDD); IPR029044 (SUPERFAMILY)	P:GO:0008299; F:GO:0050518; F:GO:0070567	P:isoprenoid biosynthetic process; F:2-C-methyl-D-erythritol 4-phosphate cytidylyltransferase activity; F:cytidylyltransferase activity
HY10043_c0_g1_i2	2-C-methyl-D-erythritol 4-phosphate cytidylyltransferase	1884	20	2.52042e-168	88.8	2	P:GO:0008299; F:GO:0050518	P:isoprenoid biosynthetic process; F:2-C-methyl-D-erythritol 4-phosphate cytidylyltransferase activity	EC:2.7.7.60	2-C-methyl-D-erythritol 4-phosphate cytidylyltransferase	IPR001228 (TIGRFAM); IPR034683 (PFAM); IPR029044 (G3DSA:3.90.550.GENE3D); PTHR32125:SF4 (PANTHER); PTHR32125 (PANTHER); IPR001228 (HAMAP); IPR034683 (CDD); IPR029044 (SUPERFAMILY)	P:GO:0008299; F:GO:0050518; F:GO:0070567	P:isoprenoid biosynthetic process; F:2-C-methyl-D-erythritol 4-phosphate cytidylyltransferase activity; F:cytidylyltransferase activity
HY10043_c0_g1_i3	2-C-methyl-D-erythritol 4-phosphate cytidylyltransferase, chloroplastic	788	20	1.0821e-46	87.25	2	P:GO:0008299; F:GO:0050518	P:isoprenoid biosynthetic process; F:2-C-methyl-D-erythritol 4-phosphate cytidylyltransferase activity	EC:2.7.7.60	2-C-methyl-D-erythritol 4-phosphate cytidylyltransferase	IPR034683 (PFAM); IPR029044 (G3DSA:3.90.550.GENE3D); PTHR32125 (PANTHER); PTHR32125:SF4 (PANTHER); IPR029044 (SUPERFAMILY)	F:GO:0070567	F:cytidylyltransferase activity
HY10043_c0_g1_i4	2-C-methyl-D-erythritol 4-phosphate cytidylyltransferase, chloroplastic isoform X1	1541	20	2.09295e-67	88.6	2	P:GO:0008299; F:GO:0050518	P:isoprenoid biosynthetic process; F:2-C-methyl-D-erythritol 4-phosphate cytidylyltransferase activity	EC:2.7.7.60	2-C-methyl-D-erythritol 4-phosphate cytidylyltransferase	IPR034683 (PFAM); IPR029044 (G3DSA:3.90.550.GENE3D); PTHR32125:SF4 (PANTHER); PTHR32125 (PANTHER); IPR029044 (SUPERFAMILY)	F:GO:0070567	F:cytidylyltransferase activity
HY10043_c0_g1_i5	2-C-methyl-D-erythritol 4-phosphate cytidylyltransferase, chloroplastic isoform X2	1908	20	2.21559e-97	79.85	2	P:GO:0008299; F:GO:0050518	P:isoprenoid biosynthetic process; F:2-C-methyl-D-erythritol 4-phosphate cytidylyltransferase activity	EC:2.7.7.60	2-C-methyl-D-erythritol 4-phosphate cytidylyltransferase	IPR034683 (PFAM); IPR029044 (G3DSA:3.90.550.GENE3D); PTHR32125:SF4 (PANTHER); PTHR32125 (PANTHER); IPR029044 (SUPERFAMILY)	F:GO:0070567	F:cytidylyltransferase activity
HY10043_c0_g1_i6	2-C-methyl-D-erythritol 4-phosphate cytidylyltransferase, chloroplastic isoform X3	1420	20	1.28568e-163	88.8	2	P:GO:0008299; F:GO:0050518	P:isoprenoid biosynthetic process; F:2-C-methyl-D-erythritol 4-phosphate cytidylyltransferase activity	EC:2.7.7.60	2-C-methyl-D-erythritol 4-phosphate cytidylyltransferase	IPR034683 (PFAM); IPR001228 (TIGRFAM); IPR029044 (G3DSA:3.90.550.GENE3D); PTHR32125:SF4 (PANTHER); PTHR32125 (PANTHER); IPR001228 (HAMAP); IPR034683 (CDD); IPR029044 (SUPERFAMILY)	P:GO:0008299; F:GO:0050518; F:GO:0070567	P:isoprenoid biosynthetic process; F:2-C-methyl-D-erythritol 4-phosphate cytidylyltransferase activity; F:cytidylyltransferase activity
HY10043_c0_g1_i7	2-C-methyl-D-erythritol 4-phosphate cytidylyltransferase	1693	20	1.10699e-180	89.45	2	P:GO:0008299; F:GO:0050518	P:isoprenoid biosynthetic process; F:2-C-methyl-D-erythritol 4-phosphate cytidylyltransferase activity	EC:2.7.7.60	2-C-methyl-D-erythritol 4-phosphate cytidylyltransferase	IPR001228 (TIGRFAM); IPR029044 (G3DSA:3.90.550.GENE3D); IPR034683 (PFAM); PTHR32125:SF4 (PANTHER); PTHR32125 (PANTHER); IPR001228 (HAMAP); IPR034683 (CDD); IPR029044 (SUPERFAMILY)	P:GO:0008299; F:GO:0050518; F:GO:0070567	P:isoprenoid biosynthetic process; F:2-C-methyl-D-erythritol 4-phosphate cytidylyltransferase activity; F:cytidylyltransferase activity
HY10043_c0_g1_i8	2-C-methyl-D-erythritol 4-phosphate cytidylyltransferase, chloroplastic	850	20	7.57511e-10	94.85	2	P:GO:0008299; F:GO:0050518	P:isoprenoid biosynthetic process; F:2-C-methyl-D-erythritol 4-phosphate cytidylyltransferase activity	EC:2.7.7.60	2-C-methyl-D-erythritol 4-phosphate cytidylyltransferase	no IPS match	no IPS match	no IPS match
HY10043_c0_g1_i9	2-C-methyl-D-erythritol 4-phosphate cytidylyltransferase, chloroplastic isoform X3	1523	20	1.02704e-91	82.05	2	P:GO:0008299; F:GO:0050518	P:isoprenoid biosynthetic process; F:2-C-methyl-D-erythritol 4-phosphate cytidylyltransferase activity	EC:2.7.7.60	2-C-methyl-D-erythritol 4-phosphate cytidylyltransferase	IPR034683 (PFAM); IPR029044 (G3DSA:3.90.550.GENE3D); PTHR32125 (PANTHER); PTHR32125:SF4 (PANTHER); IPR029044 (SUPERFAMILY)	F:GO:0070567	F:cytidylyltransferase activity
HY10043_c0_g2_i1	2-C-methyl-D-erythritol 4-phosphate cytidylyltransferase	240	14	0.000203099	100	6	F:GO:0003824; P:GO:0008299; F:GO:0016740; F:GO:0016779; F:GO:0050518; F:GO:0070567	F:catalytic activity; P:isoprenoid biosynthetic process; F:transferase activity; F:nucleotidyltransferase activity; F:2-C-methyl-D-erythritol 4-phosphate cytidylyltransferase activity; F:cytidylyltransferase activity			no IPS match	no IPS match	no IPS match
HY10044_c0_g1_i1	glucan endo-1,3-beta-glucosidase 7	579	20	1.196e-07	98.8	4	C:GO:0005576; P:GO:0006076; F:GO:0042803; F:GO:0042973	C:extracellular region; P:(1->3)-beta-D-glucan catabolic process; F:protein homodimerization activity; F:glucan endo-1,3-beta-D-glucosidase activity	EC:3.2.1.21; EC:3.2.1.39	Beta-glucosidase; Glucan endo-1,3-beta-D-glucosidase	no IPS match	no IPS match	no IPS match
HY10044_c0_g1_i2	---NA---	433									no IPS match	no IPS match	no IPS match
HY10044_c1_g1_i1	---NA---	798									no IPS match	no IPS match	no IPS match
HY10044_c2_g1_i1	RNA-binding protein 1-like	1130	20	3.71324e-35	88.7	1	F:GO:0003723	F:RNA binding			IPR000504 (PFAM); G3DSA:3.30.70.330 (GENE3D); PTHR10501 (PANTHER); PTHR10501:SF19 (PANTHER); IPR035979 (SUPERFAMILY)	F:GO:0003676	F:nucleic acid binding
HY10044_c2_g1_i10	RNA-binding protein 1-like	271	20	1.51677e-21	83.7	3	P:GO:0000398; C:GO:0016021; F:GO:0035614	P:mRNA splicing, via spliceosome; C:integral component of membrane; F:snRNA stem-loop binding			no IPS match	no IPS match	no IPS match
HY10044_c2_g1_i11	RNA-binding protein 2-like isoform X2	2361	20	1.50002e-13	93.6	1	F:GO:0003723	F:RNA binding			no IPS match	no IPS match	no IPS match
HY10044_c2_g1_i2	RNA-binding protein 1-like	571	20	2.13465e-51	90.25	2	P:GO:0000398; F:GO:0035614	P:mRNA splicing, via spliceosome; F:snRNA stem-loop binding			IPR000504 (PFAM); G3DSA:3.30.70.330 (GENE3D); G3DSA:3.30.70.330 (GENE3D); PTHR10501:SF19 (PANTHER); PTHR10501 (PANTHER); IPR035979 (SUPERFAMILY)	F:GO:0003676	F:nucleic acid binding
HY10044_c2_g1_i3	RNA-binding protein 2-like isoform X1	2566	20	5.35552e-106	78.85	1	F:GO:0003723	F:RNA binding			G3DSA:3.30.70.330 (GENE3D); IPR000504 (PFAM); PTHR10501 (PANTHER); PTHR10501:SF19 (PANTHER); IPR035979 (SUPERFAMILY)	F:GO:0003676	F:nucleic acid binding
HY10044_c2_g1_i4	RNA-binding protein 2-like isoform X1	3337	20	2.59131e-121	78.7	1	F:GO:0003723	F:RNA binding			IPR000504 (PFAM); G3DSA:3.30.70.330 (GENE3D); PTHR10501:SF19 (PANTHER); PTHR10501 (PANTHER); IPR035979 (SUPERFAMILY)	F:GO:0003676	F:nucleic acid binding
HY10044_c2_g1_i5	---NA---	284									no IPS match	no IPS match	no IPS match
HY10044_c2_g1_i6	RNA-binding protein 2-like isoform X1	3452	20	5.31427e-121	78.7	1	F:GO:0003723	F:RNA binding			IPR000504 (PFAM); G3DSA:3.30.70.330 (GENE3D); PTHR10501:SF19 (PANTHER); PTHR10501 (PANTHER); IPR035979 (SUPERFAMILY)	F:GO:0003676	F:nucleic acid binding
HY10044_c2_g1_i7	RNA-binding protein 2-like isoform X1	437	2	9.0623e-07	92.5						no IPS match	no IPS match	no IPS match
HY10044_c2_g1_i8	RNA-binding protein 2-like isoform X1	2236	20	3.1785e-76	81.6	1	F:GO:0003723	F:RNA binding			G3DSA:3.30.70.330 (GENE3D); IPR000504 (PFAM); PTHR10501 (PANTHER); PTHR10501:SF19 (PANTHER); IPR035979 (SUPERFAMILY)	F:GO:0003676	F:nucleic acid binding
HY10044_c2_g1_i9	RNA-binding protein 2-like isoform X1	2502	20	7.96118e-118	77.55	1	F:GO:0003723	F:RNA binding			G3DSA:3.30.70.330 (GENE3D); IPR000504 (PFAM); PTHR10501 (PANTHER); PTHR10501:SF19 (PANTHER); IPR035979 (SUPERFAMILY)	F:GO:0003676	F:nucleic acid binding
HY10044_c3_g1_i1	---NA---	634									no IPS match	no IPS match	no IPS match
HY10044_c4_g1_i1	---NA---	241									no IPS match	no IPS match	no IPS match
HY10045_c0_g1_i1	putative nuclease HARBI1	1796	20	0	92.9						IPR027806 (PFAM); PTHR22930 (PANTHER); PTHR22930:SF58 (PANTHER)	no GO terms	no GO terms
HY10045_c0_g1_i2	---NA---	250									mobidb-lite (MOBIDB_LITE)	no GO terms	no GO terms
HY10045_c0_g1_i3	putative nuclease HARBI1	1813	20	0	92.85						IPR027806 (PFAM); PTHR22930:SF58 (PANTHER); PTHR22930 (PANTHER)	no GO terms	no GO terms
HY10045_c0_g1_i4	putative nuclease HARBI1	2864	20	0	92.6						IPR027806 (PFAM); PTHR22930:SF58 (PANTHER); PTHR22930 (PANTHER)	no GO terms	no GO terms
HY10045_c0_g1_i5	putative nuclease HARBI1	2172	20	0	92.6						IPR027806 (PFAM); PTHR22930:SF58 (PANTHER); PTHR22930 (PANTHER)	no GO terms	no GO terms
HY10045_c0_g2_i1	phospholipase A1-Igamma1, chloroplastic-like	2197	20	0	85.15	2	P:GO:0006629; F:GO:0016787	P:lipid metabolic process; F:hydrolase activity			IPR029058 (G3DSA:3.40.50.GENE3D); IPR002921 (PFAM); mobidb-lite (MOBIDB_LITE); PTHR31403:SF6 (PANTHER); PTHR31403 (PANTHER); cd00519 (CDD); IPR029058 (SUPERFAMILY)	P:GO:0006629	P:lipid metabolic process
HY10045_c0_g2_i2	phospholipase A1-Igamma1, chloroplastic-like	2197	20	0	86.15	2	P:GO:0006629; F:GO:0016787	P:lipid metabolic process; F:hydrolase activity			IPR029058 (G3DSA:3.40.50.GENE3D); IPR002921 (PFAM); mobidb-lite (MOBIDB_LITE); mobidb-lite (MOBIDB_LITE); PTHR31403 (PANTHER); PTHR31403:SF6 (PANTHER); cd00519 (CDD); IPR029058 (SUPERFAMILY)	P:GO:0006629	P:lipid metabolic process
HY10045_c0_g2_i3	phospholipase A1-Igamma1, chloroplastic-like	936	20	3.19136e-13	70.35	2	P:GO:0006629; F:GO:0016787	P:lipid metabolic process; F:hydrolase activity			no IPS match	no IPS match	no IPS match
HY10045_c0_g2_i4	phospholipase A1-Igamma2, chloroplastic-like	2335	20	0	84.4	2	P:GO:0006629; F:GO:0016787	P:lipid metabolic process; F:hydrolase activity			IPR002921 (PFAM); IPR029058 (G3DSA:3.40.50.GENE3D); mobidb-lite (MOBIDB_LITE); PTHR31403 (PANTHER); PTHR31403:SF7 (PANTHER); cd00519 (CDD); IPR029058 (SUPERFAMILY)	P:GO:0006629	P:lipid metabolic process
HY10045_c0_g3_i1	hypothetical protein CICLE_v10021958mg	1576	20	7.31885e-107	65.15						mobidb-lite (MOBIDB_LITE); PTHR34356:SF1 (PANTHER); PTHR34356 (PANTHER)	no GO terms	no GO terms
HY10045_c0_g3_i2	hypothetical protein CICLE_v10021958mg	1497	20	8.62802e-173	73.2						mobidb-lite (MOBIDB_LITE); PTHR34356:SF1 (PANTHER); PTHR34356 (PANTHER)	no GO terms	no GO terms
HY10045_c0_g3_i3	hypothetical protein CICLE_v10021958mg	1483	20	7.47053e-173	73.2						mobidb-lite (MOBIDB_LITE); PTHR34356:SF1 (PANTHER); PTHR34356 (PANTHER)	no GO terms	no GO terms
HY10045_c0_g3_i4	hypothetical protein CICLE_v10021958mg	2121	20	1.05894e-169	73.2						mobidb-lite (MOBIDB_LITE); PTHR34356:SF1 (PANTHER); PTHR34356 (PANTHER)	no GO terms	no GO terms
HY10045_c0_g3_i5	hypothetical protein CICLE_v10021958mg	2135	20	1.20379e-169	73.2						mobidb-lite (MOBIDB_LITE); PTHR34356:SF1 (PANTHER); PTHR34356 (PANTHER)	no GO terms	no GO terms
HY10045_c0_g4_i1	---NA---	243									no IPS match	no IPS match	no IPS match
HY10045_c1_g1_i1	---NA---	344									no IPS match	no IPS match	no IPS match
HY10046_c0_g1_i1	---NA---	450									mobidb-lite (MOBIDB_LITE)	no GO terms	no GO terms
HY10046_c1_g1_i1	---NA---	458									no IPS match	no IPS match	no IPS match
HY10046_c2_g1_i1	ras-related protein RABF1	745	20	2.25286e-83	94.9	2	F:GO:0003924; F:GO:0005525	F:GTPase activity; F:GTP binding	EC:3.6.1.15	Nucleoside-triphosphate phosphatase	PR00449 (PRINTS); IPR001806 (PFAM); G3DSA:3.30.70.1390 (GENE3D); G3DSA:3.40.50.300 (GENE3D); IPR005225 (TIGRFAM); mobidb-lite (MOBIDB_LITE); PTHR24073:SF618 (PANTHER); PTHR24073 (PANTHER); PS51419 (PROSITE_PROFILES); IPR027417 (SUPERFAMILY)	F:GO:0003924; F:GO:0005525	F:GTPase activity; F:GTP binding
HY10046_c2_g1_i10	ras-related protein RABF1	1312	20	4.30325e-59	91.4	2	F:GO:0003924; F:GO:0005525	F:GTPase activity; F:GTP binding	EC:3.6.1.15	Nucleoside-triphosphate phosphatase	G3DSA:3.40.50.300 (GENE3D); IPR001806 (PFAM); PTHR24073 (PANTHER); PTHR24073:SF485 (PANTHER); IPR027417 (SUPERFAMILY)	F:GO:0003924; F:GO:0005525	F:GTPase activity; F:GTP binding
HY10046_c2_g1_i11	ras-related protein RABF1	1161	20	2.14834e-81	94.9	2	F:GO:0003924; F:GO:0005525	F:GTPase activity; F:GTP binding	EC:3.6.1.15	Nucleoside-triphosphate phosphatase	PR00449 (PRINTS); IPR005225 (TIGRFAM); G3DSA:3.30.70.1390 (GENE3D); G3DSA:3.40.50.300 (GENE3D); IPR001806 (PFAM); mobidb-lite (MOBIDB_LITE); PTHR24073:SF618 (PANTHER); PTHR24073 (PANTHER); PS51419 (PROSITE_PROFILES); IPR027417 (SUPERFAMILY)	F:GO:0003924; F:GO:0005525	F:GTPase activity; F:GTP binding
HY10046_c2_g1_i12	ras-related protein RABF1	2507	20	1.08391e-76	94.9	2	F:GO:0003924; F:GO:0005525	F:GTPase activity; F:GTP binding	EC:3.6.1.15	Nucleoside-triphosphate phosphatase	PR00449 (PRINTS); IPR001806 (PFAM); G3DSA:3.30.70.1390 (GENE3D); G3DSA:3.40.50.300 (GENE3D); IPR005225 (TIGRFAM); mobidb-lite (MOBIDB_LITE); PTHR24073:SF618 (PANTHER); PTHR24073 (PANTHER); PS51419 (PROSITE_PROFILES); IPR027417 (SUPERFAMILY)	F:GO:0003924; F:GO:0005525	F:GTPase activity; F:GTP binding
HY10046_c2_g1_i13	ras-related protein RABF1	2533	20	1.22997e-76	94.9	2	F:GO:0003924; F:GO:0005525	F:GTPase activity; F:GTP binding	EC:3.6.1.15	Nucleoside-triphosphate phosphatase	PR00449 (PRINTS); IPR001806 (PFAM); G3DSA:3.30.70.1390 (GENE3D); G3DSA:3.40.50.300 (GENE3D); IPR005225 (TIGRFAM); mobidb-lite (MOBIDB_LITE); PTHR24073:SF618 (PANTHER); PTHR24073 (PANTHER); PS51419 (PROSITE_PROFILES); IPR027417 (SUPERFAMILY)	F:GO:0003924; F:GO:0005525	F:GTPase activity; F:GTP binding
HY10046_c2_g1_i14	ras-related protein RABF1	2672	20	5.97621e-56	91.4	2	F:GO:0003924; F:GO:0005525	F:GTPase activity; F:GTP binding	EC:3.6.1.15	Nucleoside-triphosphate phosphatase	G3DSA:3.40.50.300 (GENE3D); IPR001806 (PFAM); PTHR24073:SF485 (PANTHER); PTHR24073 (PANTHER); IPR027417 (SUPERFAMILY)	F:GO:0003924; F:GO:0005525	F:GTPase activity; F:GTP binding
HY10046_c2_g1_i15	ras-related protein RABF1	2008	20	1.53433e-135	95.45	2	F:GO:0003924; F:GO:0005525	F:GTPase activity; F:GTP binding	EC:3.6.1.15	Nucleoside-triphosphate phosphatase	PR00449 (PRINTS); IPR001806 (PFAM); G3DSA:3.30.70.1390 (GENE3D); IPR005225 (TIGRFAM); G3DSA:3.40.50.300 (GENE3D); mobidb-lite (MOBIDB_LITE); PTHR24073:SF618 (PANTHER); PTHR24073 (PANTHER); PS51419 (PROSITE_PROFILES); cd01860 (CDD); IPR027417 (SUPERFAMILY)	F:GO:0003924; F:GO:0005525	F:GTPase activity; F:GTP binding
HY10046_c2_g1_i16	ras-related protein RABF1	2659	20	5.80698e-56	91.4	2	F:GO:0003924; F:GO:0005525	F:GTPase activity; F:GTP binding	EC:3.6.1.15	Nucleoside-triphosphate phosphatase	G3DSA:3.40.50.300 (GENE3D); IPR001806 (PFAM); PTHR24073:SF485 (PANTHER); PTHR24073 (PANTHER); IPR027417 (SUPERFAMILY)	F:GO:0003924; F:GO:0005525	F:GTPase activity; F:GTP binding
HY10046_c2_g1_i17	ras-related protein RABF1	1995	20	1.35981e-135	95.45	2	F:GO:0003924; F:GO:0005525	F:GTPase activity; F:GTP binding	EC:3.6.1.15	Nucleoside-triphosphate phosphatase	PR00449 (PRINTS); IPR001806 (PFAM); G3DSA:3.30.70.1390 (GENE3D); IPR005225 (TIGRFAM); G3DSA:3.40.50.300 (GENE3D); mobidb-lite (MOBIDB_LITE); PTHR24073:SF618 (PANTHER); PTHR24073 (PANTHER); PS51419 (PROSITE_PROFILES); cd01860 (CDD); IPR027417 (SUPERFAMILY)	F:GO:0003924; F:GO:0005525	F:GTPase activity; F:GTP binding
HY10046_c2_g1_i18	ras-related protein RABF1	1213	20	1.29945e-136	95.45	2	F:GO:0003924; F:GO:0005525	F:GTPase activity; F:GTP binding	EC:3.6.1.15	Nucleoside-triphosphate phosphatase	PR00449 (PRINTS); IPR005225 (TIGRFAM); G3DSA:3.30.70.1390 (GENE3D); G3DSA:3.40.50.300 (GENE3D); IPR001806 (PFAM); mobidb-lite (MOBIDB_LITE); PTHR24073:SF618 (PANTHER); PTHR24073 (PANTHER); PS51419 (PROSITE_PROFILES); cd01860 (CDD); IPR027417 (SUPERFAMILY)	F:GO:0003924; F:GO:0005525	F:GTPase activity; F:GTP binding
HY10046_c2_g1_i19	ras-related protein RABF1	2482	20	9.53155e-77	94.9	2	F:GO:0003924; F:GO:0005525	F:GTPase activity; F:GTP binding	EC:3.6.1.15	Nucleoside-triphosphate phosphatase	PR00449 (PRINTS); IPR001806 (PFAM); G3DSA:3.30.70.1390 (GENE3D); G3DSA:3.40.50.300 (GENE3D); IPR005225 (TIGRFAM); mobidb-lite (MOBIDB_LITE); PTHR24073:SF618 (PANTHER); PTHR24073 (PANTHER); PS51419 (PROSITE_PROFILES); IPR027417 (SUPERFAMILY)	F:GO:0003924; F:GO:0005525	F:GTPase activity; F:GTP binding
HY10046_c2_g1_i2	ras-related protein RABF1	1982	20	1.2047e-135	95.45	2	F:GO:0003924; F:GO:0005525	F:GTPase activity; F:GTP binding	EC:3.6.1.15	Nucleoside-triphosphate phosphatase	PR00449 (PRINTS); IPR001806 (PFAM); G3DSA:3.30.70.1390 (GENE3D); IPR005225 (TIGRFAM); G3DSA:3.40.50.300 (GENE3D); mobidb-lite (MOBIDB_LITE); PTHR24073:SF618 (PANTHER); PTHR24073 (PANTHER); PS51419 (PROSITE_PROFILES); cd01860 (CDD); IPR027417 (SUPERFAMILY)	F:GO:0003924; F:GO:0005525	F:GTPase activity; F:GTP binding
HY10046_c2_g1_i20	ras-related protein RABF1	2684	20	6.14719e-56	91.4	2	F:GO:0003924; F:GO:0005525	F:GTPase activity; F:GTP binding	EC:3.6.1.15	Nucleoside-triphosphate phosphatase	G3DSA:3.40.50.300 (GENE3D); IPR001806 (PFAM); PTHR24073:SF485 (PANTHER); PTHR24073 (PANTHER); IPR027417 (SUPERFAMILY)	F:GO:0003924; F:GO:0005525	F:GTPase activity; F:GTP binding
HY10046_c2_g1_i21	ras-related protein RABF1	1135	20	1.66409e-81	94.9	2	F:GO:0003924; F:GO:0005525	F:GTPase activity; F:GTP binding	EC:3.6.1.15	Nucleoside-triphosphate phosphatase	PR00449 (PRINTS); IPR005225 (TIGRFAM); G3DSA:3.30.70.1390 (GENE3D); G3DSA:3.40.50.300 (GENE3D); IPR001806 (PFAM); mobidb-lite (MOBIDB_LITE); PTHR24073:SF618 (PANTHER); PTHR24073 (PANTHER); PS51419 (PROSITE_PROFILES); IPR027417 (SUPERFAMILY)	F:GO:0003924; F:GO:0005525	F:GTPase activity; F:GTP binding
HY10046_c2_g1_i22	ras-related protein RABF1	2495	20	1.01671e-76	94.9	2	F:GO:0003924; F:GO:0005525	F:GTPase activity; F:GTP binding	EC:3.6.1.15	Nucleoside-triphosphate phosphatase	PR00449 (PRINTS); IPR001806 (PFAM); G3DSA:3.30.70.1390 (GENE3D); G3DSA:3.40.50.300 (GENE3D); IPR005225 (TIGRFAM); mobidb-lite (MOBIDB_LITE); PTHR24073:SF618 (PANTHER); PTHR24073 (PANTHER); PS51419 (PROSITE_PROFILES); IPR027417 (SUPERFAMILY)	F:GO:0003924; F:GO:0005525	F:GTPase activity; F:GTP binding
HY10046_c2_g1_i23	ras-related protein RABF1	2697	20	6.31983e-56	91.4	2	F:GO:0003924; F:GO:0005525	F:GTPase activity; F:GTP binding	EC:3.6.1.15	Nucleoside-triphosphate phosphatase	G3DSA:3.40.50.300 (GENE3D); IPR001806 (PFAM); PTHR24073:SF485 (PANTHER); PTHR24073 (PANTHER); IPR027417 (SUPERFAMILY)	F:GO:0003924; F:GO:0005525	F:GTPase activity; F:GTP binding
HY10046_c2_g1_i24	ras-related protein RABF1	1239	20	1.73201e-136	95.45	2	F:GO:0003924; F:GO:0005525	F:GTPase activity; F:GTP binding	EC:3.6.1.15	Nucleoside-triphosphate phosphatase	PR00449 (PRINTS); IPR005225 (TIGRFAM); G3DSA:3.30.70.1390 (GENE3D); G3DSA:3.40.50.300 (GENE3D); IPR001806 (PFAM); mobidb-lite (MOBIDB_LITE); PTHR24073:SF618 (PANTHER); PTHR24073 (PANTHER); PS51419 (PROSITE_PROFILES); cd01860 (CDD); IPR027417 (SUPERFAMILY)	F:GO:0003924; F:GO:0005525	F:GTPase activity; F:GTP binding
HY10046_c2_g1_i25	ras-related protein RABF1	2520	20	1.15494e-76	94.9	2	F:GO:0003924; F:GO:0005525	F:GTPase activity; F:GTP binding	EC:3.6.1.15	Nucleoside-triphosphate phosphatase	PR00449 (PRINTS); IPR001806 (PFAM); G3DSA:3.30.70.1390 (GENE3D); G3DSA:3.40.50.300 (GENE3D); IPR005225 (TIGRFAM); mobidb-lite (MOBIDB_LITE); PTHR24073:SF618 (PANTHER); PTHR24073 (PANTHER); PS51419 (PROSITE_PROFILES); IPR027417 (SUPERFAMILY)	F:GO:0003924; F:GO:0005525	F:GTPase activity; F:GTP binding
HY10046_c2_g1_i26	ras-related protein RABF1	1226	20	1.5005e-136	95.45	2	F:GO:0003924; F:GO:0005525	F:GTPase activity; F:GTP binding	EC:3.6.1.15	Nucleoside-triphosphate phosphatase	PR00449 (PRINTS); IPR005225 (TIGRFAM); G3DSA:3.30.70.1390 (GENE3D); G3DSA:3.40.50.300 (GENE3D); IPR001806 (PFAM); mobidb-lite (MOBIDB_LITE); PTHR24073:SF618 (PANTHER); PTHR24073 (PANTHER); PS51419 (PROSITE_PROFILES); cd01860 (CDD); IPR027417 (SUPERFAMILY)	F:GO:0003924; F:GO:0005525	F:GTPase activity; F:GTP binding
HY10046_c2_g1_i27	ras-related protein RABF1	1325	20	4.76899e-59	91.4	2	F:GO:0003924; F:GO:0005525	F:GTPase activity; F:GTP binding	EC:3.6.1.15	Nucleoside-triphosphate phosphatase	G3DSA:3.40.50.300 (GENE3D); IPR001806 (PFAM); PTHR24073 (PANTHER); PTHR24073:SF485 (PANTHER); IPR027417 (SUPERFAMILY)	F:GO:0003924; F:GO:0005525	F:GTPase activity; F:GTP binding
HY10046_c2_g1_i28	ras-related protein RABF1	2685	20	6.14719e-56	91.4	2	F:GO:0003924; F:GO:0005525	F:GTPase activity; F:GTP binding	EC:3.6.1.15	Nucleoside-triphosphate phosphatase	G3DSA:3.40.50.300 (GENE3D); IPR001806 (PFAM); PTHR24073:SF485 (PANTHER); PTHR24073 (PANTHER); IPR027417 (SUPERFAMILY)	F:GO:0003924; F:GO:0005525	F:GTPase activity; F:GTP binding
HY10046_c2_g1_i29	ras-related protein RABF1	2020	20	1.78339e-135	95.45	2	F:GO:0003924; F:GO:0005525	F:GTPase activity; F:GTP binding	EC:3.6.1.15	Nucleoside-triphosphate phosphatase	PR00449 (PRINTS); IPR001806 (PFAM); G3DSA:3.30.70.1390 (GENE3D); IPR005225 (TIGRFAM); G3DSA:3.40.50.300 (GENE3D); mobidb-lite (MOBIDB_LITE); PTHR24073:SF618 (PANTHER); PTHR24073 (PANTHER); PS51419 (PROSITE_PROFILES); cd01860 (CDD); IPR027417 (SUPERFAMILY)	F:GO:0003924; F:GO:0005525	F:GTPase activity; F:GTP binding
HY10046_c2_g1_i3	ras-related protein RABF1	2508	20	1.08391e-76	94.9	2	F:GO:0003924; F:GO:0005525	F:GTPase activity; F:GTP binding	EC:3.6.1.15	Nucleoside-triphosphate phosphatase	PR00449 (PRINTS); IPR001806 (PFAM); G3DSA:3.30.70.1390 (GENE3D); G3DSA:3.40.50.300 (GENE3D); IPR005225 (TIGRFAM); mobidb-lite (MOBIDB_LITE); PTHR24073:SF618 (PANTHER); PTHR24073 (PANTHER); PS51419 (PROSITE_PROFILES); IPR027417 (SUPERFAMILY)	F:GO:0003924; F:GO:0005525	F:GTPase activity; F:GTP binding
HY10046_c2_g1_i4	ras-related protein RABF1	2710	20	6.49401e-56	91.4	2	F:GO:0003924; F:GO:0005525	F:GTPase activity; F:GTP binding	EC:3.6.1.15	Nucleoside-triphosphate phosphatase	G3DSA:3.40.50.300 (GENE3D); IPR001806 (PFAM); PTHR24073:SF485 (PANTHER); PTHR24073 (PANTHER); IPR027417 (SUPERFAMILY)	F:GO:0003924; F:GO:0005525	F:GTPase activity; F:GTP binding
HY10046_c2_g1_i5	ras-related protein RABF1	1338	20	5.28126e-59	91.4	2	F:GO:0003924; F:GO:0005525	F:GTPase activity; F:GTP binding	EC:3.6.1.15	Nucleoside-triphosphate phosphatase	G3DSA:3.40.50.300 (GENE3D); IPR001806 (PFAM); PTHR24073 (PANTHER); PTHR24073:SF485 (PANTHER); IPR027417 (SUPERFAMILY)	F:GO:0003924; F:GO:0005525	F:GTPase activity; F:GTP binding
HY10046_c2_g1_i6	ras-related protein RABF1	2007	20	1.58126e-135	95.45	2	F:GO:0003924; F:GO:0005525	F:GTPase activity; F:GTP binding	EC:3.6.1.15	Nucleoside-triphosphate phosphatase	PR00449 (PRINTS); IPR001806 (PFAM); G3DSA:3.30.70.1390 (GENE3D); IPR005225 (TIGRFAM); G3DSA:3.40.50.300 (GENE3D); mobidb-lite (MOBIDB_LITE); PTHR24073:SF618 (PANTHER); PTHR24073 (PANTHER); PS51419 (PROSITE_PROFILES); cd01860 (CDD); IPR027417 (SUPERFAMILY)	F:GO:0003924; F:GO:0005525	F:GTPase activity; F:GTP binding
HY10046_c2_g1_i7	ras-related protein RABF1	2033	20	2.01063e-135	95.45	2	F:GO:0003924; F:GO:0005525	F:GTPase activity; F:GTP binding	EC:3.6.1.15	Nucleoside-triphosphate phosphatase	PR00449 (PRINTS); IPR001806 (PFAM); G3DSA:3.30.70.1390 (GENE3D); IPR005225 (TIGRFAM); G3DSA:3.40.50.300 (GENE3D); mobidb-lite (MOBIDB_LITE); PTHR24073:SF618 (PANTHER); PTHR24073 (PANTHER); PS51419 (PROSITE_PROFILES); cd01860 (CDD); IPR027417 (SUPERFAMILY)	F:GO:0003924; F:GO:0005525	F:GTPase activity; F:GTP binding
HY10046_c2_g1_i8	ras-related protein RABF1	1148	20	1.89132e-81	94.9	2	F:GO:0003924; F:GO:0005525	F:GTPase activity; F:GTP binding	EC:3.6.1.15	Nucleoside-triphosphate phosphatase	PR00449 (PRINTS); IPR005225 (TIGRFAM); G3DSA:3.30.70.1390 (GENE3D); G3DSA:3.40.50.300 (GENE3D); IPR001806 (PFAM); mobidb-lite (MOBIDB_LITE); PTHR24073:SF618 (PANTHER); PTHR24073 (PANTHER); PS51419 (PROSITE_PROFILES); IPR027417 (SUPERFAMILY)	F:GO:0003924; F:GO:0005525	F:GTPase activity; F:GTP binding
HY10046_c2_g1_i9	ras-related protein RABF1	631	20	1.49862e-133	95.55	2	F:GO:0003924; F:GO:0005525	F:GTPase activity; F:GTP binding	EC:3.6.1.15	Nucleoside-triphosphate phosphatase	PR00449 (PRINTS); IPR005225 (TIGRFAM); G3DSA:3.40.50.300 (GENE3D); IPR001806 (PFAM); G3DSA:3.30.70.1390 (GENE3D); mobidb-lite (MOBIDB_LITE); PTHR24073 (PANTHER); PTHR24073:SF618 (PANTHER); PS51419 (PROSITE_PROFILES); cd01860 (CDD); IPR027417 (SUPERFAMILY)	F:GO:0003924; F:GO:0005525	F:GTPase activity; F:GTP binding
HY10046_c2_g2_i1	hypothetical protein CICLE_v10013695mg	272	3	2.10473e-14	69.67	5	F:GO:0003677; F:GO:0004519; C:GO:0005622; P:GO:0006281; P:GO:0090305	F:DNA binding; F:endonuclease activity; C:intracellular; P:DNA repair; P:nucleic acid phosphodiester bond hydrolysis			no IPS match	no IPS match	no IPS match
HY10046_c2_g2_i2	hypothetical protein CICLE_v10013695mg	298	3	2.8057e-14	69.67	5	F:GO:0003677; F:GO:0004519; C:GO:0005622; P:GO:0006281; P:GO:0090305	F:DNA binding; F:endonuclease activity; C:intracellular; P:DNA repair; P:nucleic acid phosphodiester bond hydrolysis			no IPS match	no IPS match	no IPS match
HY10046_c2_g3_i1	transmembrane protein 87A	1775	20	0	91.85	2	C:GO:0005794; C:GO:0016021	C:Golgi apparatus; C:integral component of membrane			IPR009637 (PFAM); PTHR21229:SF15 (PANTHER); IPR009637 (PANTHER)	C:GO:0016021	C:integral component of membrane
HY10046_c2_g3_i2	transmembrane protein 87A	1859	20	0	91.85	2	C:GO:0005794; C:GO:0016021	C:Golgi apparatus; C:integral component of membrane			IPR009637 (PFAM); PTHR21229:SF15 (PANTHER); IPR009637 (PANTHER)	C:GO:0016021	C:integral component of membrane
HY10046_c2_g3_i3	transmembrane protein 87A	2176	20	0	91.35	2	C:GO:0005794; C:GO:0016021	C:Golgi apparatus; C:integral component of membrane			IPR009637 (PFAM); mobidb-lite (MOBIDB_LITE); IPR009637 (PANTHER); PTHR21229:SF15 (PANTHER)	C:GO:0016021	C:integral component of membrane
HY10046_c2_g3_i4	transmembrane protein 87A-like	1968	20	0	91.4	2	C:GO:0005794; C:GO:0016021	C:Golgi apparatus; C:integral component of membrane			IPR009637 (PFAM); PTHR21229:SF15 (PANTHER); IPR009637 (PANTHER)	C:GO:0016021	C:integral component of membrane
HY10046_c2_g3_i5	transmembrane protein 87A-like	2125	20	0	91.4	2	C:GO:0005794; C:GO:0016021	C:Golgi apparatus; C:integral component of membrane			IPR009637 (PFAM); PTHR21229:SF15 (PANTHER); IPR009637 (PANTHER)	C:GO:0016021	C:integral component of membrane
HY10046_c2_g3_i6	transmembrane protein 87A	2016	20	0	91.85	2	C:GO:0005794; C:GO:0016021	C:Golgi apparatus; C:integral component of membrane			IPR009637 (PFAM); PTHR21229:SF15 (PANTHER); IPR009637 (PANTHER)	C:GO:0016021	C:integral component of membrane
HY10046_c3_g1_i1	---NA---	243									no IPS match	no IPS match	no IPS match
HY10046_c4_g1_i1	---NA---	236									no IPS match	no IPS match	no IPS match
HY10047_c2_g1_i1	ABC transporter B family member 15-like	1437	20	0	92.4	4	F:GO:0005524; C:GO:0016021; F:GO:0042626; P:GO:0055085	F:ATP binding; C:integral component of membrane; F:ATPase activity, coupled to transmembrane movement of substances; P:transmembrane transport	EC:3.6.1.3; EC:3.6.1.15	Adenosinetriphosphatase; Nucleoside-triphosphate phosphatase	IPR036640 (G3DSA:1.20.1560.GENE3D); IPR003439 (PFAM); G3DSA:3.40.50.300 (GENE3D); PTHR24221 (PANTHER); PTHR24221:SF381 (PANTHER); IPR003439 (PROSITE_PROFILES); IPR011527 (PROSITE_PROFILES); cd03249 (CDD); IPR027417 (SUPERFAMILY); IPR036640 (SUPERFAMILY)	F:GO:0005524; C:GO:0016021; F:GO:0016887; F:GO:0042626; P:GO:0055085	F:ATP binding; C:integral component of membrane; F:ATPase activity; F:ATPase activity, coupled to transmembrane movement of substances; P:transmembrane transport
HY10047_c2_g1_i2	ABC transporter B family member 15-like	1071	20	0	92.55	4	F:GO:0005524; C:GO:0016021; F:GO:0042626; P:GO:0055085	F:ATP binding; C:integral component of membrane; F:ATPase activity, coupled to transmembrane movement of substances; P:transmembrane transport	EC:3.6.1.3; EC:3.6.1.15	Adenosinetriphosphatase; Nucleoside-triphosphate phosphatase	G3DSA:3.40.50.300 (GENE3D); IPR003439 (PFAM); IPR036640 (G3DSA:1.20.1560.GENE3D); PTHR24221:SF381 (PANTHER); PTHR24221 (PANTHER); IPR003439 (PROSITE_PROFILES); IPR011527 (PROSITE_PROFILES); cd03249 (CDD); IPR036640 (SUPERFAMILY); IPR027417 (SUPERFAMILY)	F:GO:0005524; C:GO:0016021; F:GO:0016887; F:GO:0042626; P:GO:0055085	F:ATP binding; C:integral component of membrane; F:ATPase activity; F:ATPase activity, coupled to transmembrane movement of substances; P:transmembrane transport
HY10047_c2_g1_i3	ABC transporter B family member 15-like	1437	20	0	91.8	4	F:GO:0005524; C:GO:0016021; F:GO:0042626; P:GO:0055085	F:ATP binding; C:integral component of membrane; F:ATPase activity, coupled to transmembrane movement of substances; P:transmembrane transport	EC:3.6.1.3; EC:3.6.1.15	Adenosinetriphosphatase; Nucleoside-triphosphate phosphatase	G3DSA:3.40.50.300 (GENE3D); IPR036640 (G3DSA:1.20.1560.GENE3D); IPR003439 (PFAM); PTHR24221:SF381 (PANTHER); PTHR24221 (PANTHER); IPR011527 (PROSITE_PROFILES); IPR003439 (PROSITE_PROFILES); cd03249 (CDD); IPR036640 (SUPERFAMILY); IPR027417 (SUPERFAMILY)	F:GO:0005524; C:GO:0016021; F:GO:0016887; F:GO:0042626; P:GO:0055085	F:ATP binding; C:integral component of membrane; F:ATPase activity; F:ATPase activity, coupled to transmembrane movement of substances; P:transmembrane transport
HY10047_c2_g2_i1	ABC transporter B family member 15-like	2509	20	0	83.95	4	F:GO:0005524; C:GO:0016021; F:GO:0042626; P:GO:0055085	F:ATP binding; C:integral component of membrane; F:ATPase activity, coupled to transmembrane movement of substances; P:transmembrane transport	EC:3.6.1.3; EC:3.6.1.15	Adenosinetriphosphatase; Nucleoside-triphosphate phosphatase	IPR036640 (G3DSA:1.20.1560.GENE3D); G3DSA:3.40.50.300 (GENE3D); IPR036640 (G3DSA:1.20.1560.GENE3D); IPR003439 (PFAM); IPR011527 (PFAM); PTHR24221 (PANTHER); PTHR24221:SF386 (PANTHER); PTHR24221:SF386 (PANTHER); IPR011527 (PROSITE_PROFILES); IPR003439 (PROSITE_PROFILES); IPR011527 (PROSITE_PROFILES); cd03249 (CDD); IPR036640 (SUPERFAMILY); IPR027417 (SUPERFAMILY); IPR036640 (SUPERFAMILY)	F:GO:0005524; C:GO:0016021; F:GO:0016887; F:GO:0042626; P:GO:0055085	F:ATP binding; C:integral component of membrane; F:ATPase activity; F:ATPase activity, coupled to transmembrane movement of substances; P:transmembrane transport
HY10047_c2_g2_i2	ABC transporter B family member 15-like	1502	20	0	87.25	4	F:GO:0005524; C:GO:0016021; F:GO:0042626; P:GO:0055085	F:ATP binding; C:integral component of membrane; F:ATPase activity, coupled to transmembrane movement of substances; P:transmembrane transport	EC:3.6.1.3; EC:3.6.1.15	Adenosinetriphosphatase; Nucleoside-triphosphate phosphatase	IPR011527 (PFAM); G3DSA:3.40.50.300 (GENE3D); IPR036640 (G3DSA:1.20.1560.GENE3D); IPR003439 (PFAM); PTHR24221 (PANTHER); PTHR24221:SF381 (PANTHER); IPR003439 (PROSITE_PROFILES); IPR011527 (PROSITE_PROFILES); IPR027417 (SUPERFAMILY); IPR036640 (SUPERFAMILY)	F:GO:0005524; C:GO:0016021; F:GO:0016887; F:GO:0042626; P:GO:0055085	F:ATP binding; C:integral component of membrane; F:ATPase activity; F:ATPase activity, coupled to transmembrane movement of substances; P:transmembrane transport
HY10047_c2_g2_i3	ABC transporter B family member 15-like	2780	20	0	85.05	4	F:GO:0005524; C:GO:0016021; F:GO:0042626; P:GO:0055085	F:ATP binding; C:integral component of membrane; F:ATPase activity, coupled to transmembrane movement of substances; P:transmembrane transport	EC:3.6.1.3; EC:3.6.1.15	Adenosinetriphosphatase; Nucleoside-triphosphate phosphatase	IPR003439 (PFAM); IPR036640 (G3DSA:1.20.1560.GENE3D); G3DSA:3.40.50.300 (GENE3D); IPR036640 (G3DSA:1.20.1560.GENE3D); IPR011527 (PFAM); PTHR24221 (PANTHER); PTHR24221:SF381 (PANTHER); PTHR24221:SF381 (PANTHER); PTHR24221 (PANTHER); IPR011527 (PROSITE_PROFILES); IPR011527 (PROSITE_PROFILES); IPR003439 (PROSITE_PROFILES); cd03249 (CDD); IPR036640 (SUPERFAMILY); IPR036640 (SUPERFAMILY); IPR027417 (S…	F:GO:0005524; C:GO:0016021; F:GO:0016887; F:GO:0042626; P:GO:0055085	F:ATP binding; C:integral component of membrane; F:ATPase activity; F:ATPase activity, coupled to transmembrane movement of substances; P:transmembrane transport
HY10047_c2_g2_i4	ABC transporter B family member 15-like	2688	20	0	84.85	4	F:GO:0005524; C:GO:0016021; F:GO:0042626; P:GO:0055085	F:ATP binding; C:integral component of membrane; F:ATPase activity, coupled to transmembrane movement of substances; P:transmembrane transport	EC:3.6.1.3; EC:3.6.1.15	Adenosinetriphosphatase; Nucleoside-triphosphate phosphatase	IPR003439 (PFAM); IPR036640 (G3DSA:1.20.1560.GENE3D); G3DSA:3.40.50.300 (GENE3D); IPR036640 (G3DSA:1.20.1560.GENE3D); IPR011527 (PFAM); PTHR24221 (PANTHER); PTHR24221:SF386 (PANTHER); IPR011527 (PROSITE_PROFILES); IPR011527 (PROSITE_PROFILES); IPR003439 (PROSITE_PROFILES); cd03249 (CDD); IPR036640 (SUPERFAMILY); IPR027417 (SUPERFAMILY); IPR036640 (SUPERFAMILY)	F:GO:0005524; C:GO:0016021; F:GO:0016887; F:GO:0042626; P:GO:0055085	F:ATP binding; C:integral component of membrane; F:ATPase activity; F:ATPase activity, coupled to transmembrane movement of substances; P:transmembrane transport
HY10047_c2_g2_i5	ABC transporter B family member 15-like	1520	20	0	86.2	4	F:GO:0005524; C:GO:0016021; F:GO:0042626; P:GO:0055085	F:ATP binding; C:integral component of membrane; F:ATPase activity, coupled to transmembrane movement of substances; P:transmembrane transport	EC:3.6.1.3; EC:3.6.1.15	Adenosinetriphosphatase; Nucleoside-triphosphate phosphatase	IPR003439 (PFAM); G3DSA:3.40.50.300 (GENE3D); IPR036640 (G3DSA:1.20.1560.GENE3D); IPR011527 (PFAM); PTHR24221:SF381 (PANTHER); PTHR24221 (PANTHER); IPR011527 (PROSITE_PROFILES); IPR003439 (PROSITE_PROFILES); IPR036640 (SUPERFAMILY); IPR027417 (SUPERFAMILY)	F:GO:0005524; C:GO:0016021; F:GO:0016887; F:GO:0042626; P:GO:0055085	F:ATP binding; C:integral component of membrane; F:ATPase activity; F:ATPase activity, coupled to transmembrane movement of substances; P:transmembrane transport
HY10048_c0_g1_i1	hypothetical protein CICLE_v10019972mg	2884	20	0	86.1						PTHR34541:SF2 (PANTHER); PTHR34541 (PANTHER)	no GO terms	no GO terms
HY10048_c0_g1_i2	Epstein-Barr nuclear antigen 2	1080	20	9.07007e-121	94.05						PTHR34541 (PANTHER)	no GO terms	no GO terms
HY10048_c0_g1_i3	ATP-dependent helicase/nuclease subunit A	433	20	1.55357e-28	92.8	1	F:GO:0004386	F:helicase activity	EC:3.6.1.15	Nucleoside-triphosphate phosphatase	PTHR34541 (PANTHER); PTHR34541:SF2 (PANTHER)	no GO terms	no GO terms
HY10048_c0_g1_i4	PREDICTED: uncharacterized protein LOC102620562 isoform X1	3223	20	2.03442e-137	85.55						PTHR34541:SF2 (PANTHER); PTHR34541 (PANTHER)	no GO terms	no GO terms
HY10048_c0_g1_i5	hypothetical protein CICLE_v10019972mg	3492	20	0	86.1						PTHR34541:SF2 (PANTHER); PTHR34541 (PANTHER)	no GO terms	no GO terms
HY10049_c0_g1_i1	protein DETOXIFICATION 27-like	1039	20	5.94598e-110	87.45	4	P:GO:0006855; F:GO:0015238; F:GO:0015297; C:GO:0016021	P:drug transmembrane transport; F:drug transmembrane transporter activity; F:antiporter activity; C:integral component of membrane			IPR002528 (PFAM); PTHR11206 (PANTHER); PTHR11206:SF130 (PANTHER)	P:GO:0006855; F:GO:0015238; F:GO:0015297; C:GO:0016020; P:GO:0055085	P:drug transmembrane transport; F:drug transmembrane transporter activity; F:antiporter activity; C:membrane; P:transmembrane transport
HY10049_c0_g1_i2	protein DETOXIFICATION 27-like	1978	20	0	86.7	4	P:GO:0006855; F:GO:0015238; F:GO:0015297; C:GO:0016021	P:drug transmembrane transport; F:drug transmembrane transporter activity; F:antiporter activity; C:integral component of membrane			IPR002528 (TIGRFAM); IPR002528 (PFAM); PTHR11206:SF130 (PANTHER); PTHR11206 (PANTHER); cd13132 (CDD)	P:GO:0006855; F:GO:0015238; F:GO:0015297; C:GO:0016020; P:GO:0055085	P:drug transmembrane transport; F:drug transmembrane transporter activity; F:antiporter activity; C:membrane; P:transmembrane transport
HY10049_c0_g1_i3	protein DETOXIFICATION 27-like	1921	20	0	82.7	4	P:GO:0006855; F:GO:0015238; F:GO:0015297; C:GO:0016021	P:drug transmembrane transport; F:drug transmembrane transporter activity; F:antiporter activity; C:integral component of membrane			IPR002528 (PFAM); PTHR11206:SF130 (PANTHER); PTHR11206 (PANTHER)	P:GO:0006855; F:GO:0015238; F:GO:0015297; C:GO:0016020; P:GO:0055085	P:drug transmembrane transport; F:drug transmembrane transporter activity; F:antiporter activity; C:membrane; P:transmembrane transport
HY10049_c0_g1_i4	protein DETOXIFICATION 27-like	2064	20	0	88.3	4	P:GO:0006855; F:GO:0015238; F:GO:0015297; C:GO:0016021	P:drug transmembrane transport; F:drug transmembrane transporter activity; F:antiporter activity; C:integral component of membrane			IPR002528 (TIGRFAM); IPR002528 (PFAM); PTHR11206:SF130 (PANTHER); PTHR11206 (PANTHER); cd13132 (CDD)	P:GO:0006855; F:GO:0015238; F:GO:0015297; C:GO:0016020; P:GO:0055085	P:drug transmembrane transport; F:drug transmembrane transporter activity; F:antiporter activity; C:membrane; P:transmembrane transport
HY10049_c0_g1_i5	protein DETOXIFICATION 27-like	638	20	1.15422e-46	82.9	4	P:GO:0006855; F:GO:0015238; F:GO:0015297; C:GO:0016021	P:drug transmembrane transport; F:drug transmembrane transporter activity; F:antiporter activity; C:integral component of membrane			PTHR11206:SF130 (PANTHER); PTHR11206 (PANTHER)	no GO terms	no GO terms
HY10049_c0_g1_i6	protein DETOXIFICATION 27-like	2007	20	0	83.65	4	P:GO:0006855; F:GO:0015238; F:GO:0015297; C:GO:0016021	P:drug transmembrane transport; F:drug transmembrane transporter activity; F:antiporter activity; C:integral component of membrane			IPR002528 (PFAM); PTHR11206:SF130 (PANTHER); PTHR11206 (PANTHER)	P:GO:0006855; F:GO:0015238; F:GO:0015297; C:GO:0016020; P:GO:0055085	P:drug transmembrane transport; F:drug transmembrane transporter activity; F:antiporter activity; C:membrane; P:transmembrane transport
HY10049_c0_g1_i7	protein DETOXIFICATION 27-like	1422	3	7.06572e-06	81	6	P:GO:0006855; F:GO:0015238; F:GO:0015297; C:GO:0016020; C:GO:0016021; P:GO:0055085	P:drug transmembrane transport; F:drug transmembrane transporter activity; F:antiporter activity; C:membrane; C:integral component of membrane; P:transmembrane transport			no IPS match	no IPS match	no IPS match
HY1005_c0_g1_i1	F-box/kelch-repeat protein At3g23880-like	692	20	7.54992e-128	57.45						no IPS match	no IPS match	no IPS match
HY10050_c0_g1_i1	UDP-galactose/UDP-glucose transporter 5B-like	257	20	1.06386e-54	96.65	3	P:GO:0008643; C:GO:0016021; P:GO:0055085	P:carbohydrate transport; C:integral component of membrane; P:transmembrane transport			IPR013657 (PFAM); PTHR10778 (PANTHER); PTHR10778:SF13 (PANTHER)	P:GO:0055085	P:transmembrane transport
HY10050_c0_g1_i10	UDP-galactose/UDP-glucose transporter 5B isoform X1	2003	20	1.12069e-107	94.45	3	P:GO:0008643; C:GO:0016021; P:GO:0055085	P:carbohydrate transport; C:integral component of membrane; P:transmembrane transport			IPR013657 (PFAM); PTHR10778:SF13 (PANTHER); PTHR10778 (PANTHER)	P:GO:0055085	P:transmembrane transport
HY10050_c0_g1_i2	UDP-galactose/UDP-glucose transporter 5B isoform X1	976	20	4.96033e-47	94.7	3	P:GO:0008643; C:GO:0016021; P:GO:0055085	P:carbohydrate transport; C:integral component of membrane; P:transmembrane transport			PTHR10778 (PANTHER); PTHR10778:SF13 (PANTHER)	no GO terms	no GO terms
HY10050_c0_g1_i3	UDP-galactose/UDP-glucose transporter 5B isoform X1	1901	20	4.38217e-108	94.45	3	P:GO:0008643; C:GO:0016021; P:GO:0055085	P:carbohydrate transport; C:integral component of membrane; P:transmembrane transport			IPR013657 (PFAM); PTHR10778:SF13 (PANTHER); PTHR10778 (PANTHER)	P:GO:0055085	P:transmembrane transport
HY10050_c0_g1_i4	UDP-galactose/UDP-glucose transporter 5	1079	20	3.25835e-13	88.5	4	C:GO:0030173; C:GO:0030176; F:GO:0046964; P:GO:1902559	C:integral component of Golgi membrane; C:integral component of endoplasmic reticulum membrane; F:3'-phosphoadenosine 5'-phosphosulfate transmembrane transporter activity; P:3'-phospho-5'-adenylyl sulfate transmembrane transport			no IPS match	no IPS match	no IPS match
HY10050_c0_g1_i5	UDP-galactose/UDP-glucose transporter 5B isoform X1	2234	20	1.77816e-179	92.6	3	P:GO:0008643; C:GO:0016021; P:GO:0055085	P:carbohydrate transport; C:integral component of membrane; P:transmembrane transport			IPR013657 (PFAM); mobidb-lite (MOBIDB_LITE); PTHR10778:SF13 (PANTHER); PTHR10778 (PANTHER); SSF103481 (SUPERFAMILY)	P:GO:0055085	P:transmembrane transport
HY10050_c0_g1_i6	UDP-galactose/UDP-glucose transporter 5B isoform X1	2447	20	4.62852e-106	94.45	3	P:GO:0008643; C:GO:0016021; P:GO:0055085	P:carbohydrate transport; C:integral component of membrane; P:transmembrane transport			IPR013657 (PFAM); PTHR10778:SF13 (PANTHER); PTHR10778 (PANTHER)	P:GO:0055085	P:transmembrane transport
HY10050_c0_g1_i7	UDP-galactose/UDP-glucose transporter 5	971	20	2.23815e-13	88.5	4	C:GO:0030173; C:GO:0030176; F:GO:0046964; P:GO:1902559	C:integral component of Golgi membrane; C:integral component of endoplasmic reticulum membrane; F:3'-phosphoadenosine 5'-phosphosulfate transmembrane transporter activity; P:3'-phospho-5'-adenylyl sulfate transmembrane transport			no IPS match	no IPS match	no IPS match
HY10050_c0_g1_i8	UDP-galactose/UDP-glucose transporter 5B isoform X1	1790	20	1.61075e-170	74.05	2	C:GO:0016021; P:GO:0055085	C:integral component of membrane; P:transmembrane transport			IPR013657 (PFAM); PTHR10778:SF13 (PANTHER); PTHR10778 (PANTHER); PTHR10778 (PANTHER); PTHR10778:SF13 (PANTHER)	P:GO:0055085	P:transmembrane transport
HY10050_c0_g1_i9	UDP-galactose/UDP-glucose transporter 5B isoform X1	2786	20	3.70095e-159	91.65	3	P:GO:0008643; C:GO:0016021; P:GO:0055085	P:carbohydrate transport; C:integral component of membrane; P:transmembrane transport			IPR013657 (PFAM); mobidb-lite (MOBIDB_LITE); PTHR10778 (PANTHER); PTHR10778:SF13 (PANTHER); SSF103481 (SUPERFAMILY)	P:GO:0055085	P:transmembrane transport
HY10051_c0_g1_i1	CASP-like protein 5A2	3676	20	1.04344e-87	93.2	2	C:GO:0005886; C:GO:0016021	C:plasma membrane; C:integral component of membrane			no IPS match	no IPS match	no IPS match
HY10051_c0_g1_i2	CASP-like protein 5A2	3072	20	1.22546e-88	86.65	2	C:GO:0005886; C:GO:0016021	C:plasma membrane; C:integral component of membrane			no IPS match	no IPS match	no IPS match
HY10051_c0_g1_i3	CASP-like protein 5A2	3386	20	4.3051e-88	90	2	C:GO:0005886; C:GO:0016021	C:plasma membrane; C:integral component of membrane			no IPS match	no IPS match	no IPS match
HY10051_c0_g1_i4	CASP-like protein 5A2	1055	20	2.51489e-40	85.45	2	C:GO:0005886; C:GO:0016021	C:plasma membrane; C:integral component of membrane			mobidb-lite (MOBIDB_LITE); PTHR32021 (PANTHER); PTHR32021:SF16 (PANTHER)	no GO terms	no GO terms
HY10051_c0_g1_i5	CASP-like protein 5A2	763	20	4.63377e-92	88.2	2	C:GO:0005886; C:GO:0016021	C:plasma membrane; C:integral component of membrane			IPR006702 (PFAM); mobidb-lite (MOBIDB_LITE); PTHR32021:SF16 (PANTHER); PTHR32021 (PANTHER)	no GO terms	no GO terms
HY10051_c0_g1_i6	CASP-like protein 5A2	3649	20	9.70149e-88	93.2	2	C:GO:0005886; C:GO:0016021	C:plasma membrane; C:integral component of membrane			no IPS match	no IPS match	no IPS match
HY10051_c0_g1_i7	CASP-like protein 5A2	630	20	3.29261e-42	85.45	2	C:GO:0005886; C:GO:0016021	C:plasma membrane; C:integral component of membrane			mobidb-lite (MOBIDB_LITE); PTHR32021:SF16 (PANTHER); PTHR32021 (PANTHER)	no GO terms	no GO terms
HY10052_c0_g1_i1	---NA---	541									no IPS match	no IPS match	no IPS match
HY10052_c0_g1_i2	---NA---	545									no IPS match	no IPS match	no IPS match
HY10052_c0_g1_i3	---NA---	547									no IPS match	no IPS match	no IPS match
HY10052_c0_g1_i4	---NA---	543									no IPS match	no IPS match	no IPS match
HY10052_c1_g1_i1	---NA---	1228									no IPS match	no IPS match	no IPS match
HY10052_c2_g1_i1	nucleolar protein 58-like	974	20	2.26923e-98	59.45						PTHR35499 (PANTHER); PTHR35499:SF2 (PANTHER)	no GO terms	no GO terms
HY10052_c2_g1_i2	nucleolar protein 58-like	1092	20	8.81212e-82	66.3						PTHR35499 (PANTHER); PTHR35499:SF2 (PANTHER)	no GO terms	no GO terms
HY10052_c2_g2_i1	VARLMGL domain-containing protein	1391	20	0	63.9						IPR032795 (PFAM); mobidb-lite (MOBIDB_LITE); mobidb-lite (MOBIDB_LITE); mobidb-lite (MOBIDB_LITE); PTHR35499:SF2 (PANTHER); PTHR35499 (PANTHER)	no GO terms	no GO terms
HY10052_c2_g2_i2	VARLMGL domain-containing protein	1370	20	0	63.95						IPR032795 (PFAM); mobidb-lite (MOBIDB_LITE); mobidb-lite (MOBIDB_LITE); PTHR35499:SF2 (PANTHER); PTHR35499 (PANTHER)	no GO terms	no GO terms
HY10052_c3_g1_i1	hypothetical protein CISIN_1g005082mg	2468	1	5.8007e-06	69	3	F:GO:0003676; F:GO:0003723; F:GO:0046872	F:nucleic acid binding; F:RNA binding; F:metal ion binding			no IPS match	no IPS match	no IPS match
HY10052_c3_g1_i10	---NA---	1629									no IPS match	no IPS match	no IPS match
HY10052_c3_g1_i11	---NA---	450									no IPS match	no IPS match	no IPS match
HY10052_c3_g1_i12	transcription factor MYB1	318	20	8.74088e-21	100	1	F:GO:0003677	F:DNA binding			G3DSA:1.10.10.60 (GENE3D); mobidb-lite (MOBIDB_LITE); IPR017930 (PROSITE_PROFILES)	no GO terms	no GO terms
HY10052_c3_g1_i13	PREDICTED: uncharacterized protein LOC107176925	1558	20	2.12177e-121	75.1						mobidb-lite (MOBIDB_LITE)	no GO terms	no GO terms
HY10052_c3_g1_i14	Transposon Ty3-I Gag-Pol polyprotein	1953	20	0	72.45	2	F:GO:0003676; P:GO:0015074	F:nucleic acid binding; P:DNA integration			IPR021109 (G3DSA:2.40.70.GENE3D); PTHR33067 (PANTHER); PTHR33067:SF7 (PANTHER); cd00303 (CDD)	no GO terms	no GO terms
HY10052_c3_g1_i15	hypothetical protein CISIN_1g005082mg	2318	1	5.3207e-06	69	3	F:GO:0003676; F:GO:0003723; F:GO:0046872	F:nucleic acid binding; F:RNA binding; F:metal ion binding			no IPS match	no IPS match	no IPS match
HY10052_c3_g1_i16	---NA---	590									no IPS match	no IPS match	no IPS match
HY10052_c3_g1_i17	---NA---	1465									no IPS match	no IPS match	no IPS match
HY10052_c3_g1_i18	---NA---	488									no IPS match	no IPS match	no IPS match
HY10052_c3_g1_i19	---NA---	1540									no IPS match	no IPS match	no IPS match
HY10052_c3_g1_i2	Transcription factor MYB44	283	20	1.97308e-20	100	1	F:GO:0003677	F:DNA binding			G3DSA:1.10.10.60 (GENE3D); mobidb-lite (MOBIDB_LITE); IPR017930 (PROSITE_PROFILES)	no GO terms	no GO terms
HY10052_c3_g1_i20	hypothetical protein CISIN_1g005082mg	1538	1	2.82472e-06	69	3	F:GO:0003676; F:GO:0003723; F:GO:0046872	F:nucleic acid binding; F:RNA binding; F:metal ion binding			no IPS match	no IPS match	no IPS match
HY10052_c3_g1_i3	PREDICTED: uncharacterized protein LOC107176925	1589	20	3.03734e-121	75.1						mobidb-lite (MOBIDB_LITE)	no GO terms	no GO terms
HY10052_c3_g1_i4	---NA---	413									no IPS match	no IPS match	no IPS match
HY10052_c3_g1_i5	hypothetical protein CISIN_1g005082mg	1365	1	2.27756e-06	69	3	F:GO:0003676; F:GO:0003723; F:GO:0046872	F:nucleic acid binding; F:RNA binding; F:metal ion binding			no IPS match	no IPS match	no IPS match
HY10052_c3_g1_i6	Transposon Ty3-I Gag-Pol polyprotein	3210	20	0	71.65	2	F:GO:0003676; P:GO:0015074	F:nucleic acid binding; P:DNA integration			IPR021109 (G3DSA:2.40.70.GENE3D); PTHR33067 (PANTHER); PTHR33067:SF7 (PANTHER); cd00303 (CDD)	no GO terms	no GO terms
HY10052_c3_g1_i7	---NA---	409									mobidb-lite (MOBIDB_LITE)	no GO terms	no GO terms
HY10052_c3_g1_i8	transcription factor LAF1	374	6	1.78701e-20	100	1	F:GO:0003677	F:DNA binding			G3DSA:1.10.10.60 (GENE3D); mobidb-lite (MOBIDB_LITE); IPR017930 (PROSITE_PROFILES)	no GO terms	no GO terms
HY10052_c3_g1_i9	---NA---	270									no IPS match	no IPS match	no IPS match
HY10052_c3_g2_i1	Retrovirus-related Pol polyprotein from transposon 17.6	1135	20	3.86087e-112	74.95	1	F:GO:0003676	F:nucleic acid binding			no IPS match	no IPS match	no IPS match
HY10052_c3_g3_i1	probable methyltransferase At1g27930	471	20	7.55319e-45	88.6	2	C:GO:0016021; P:GO:0045492	C:integral component of membrane; P:xylan biosynthetic process			IPR021148 (PFAM); G3DSA:3.40.50.150 (GENE3D); PTHR31444:SF1 (PANTHER); IPR006514 (PANTHER)	P:GO:0045492	P:xylan biosynthetic process
HY10052_c3_g4_i1	hypothetical protein CISIN_1g047632mg	726	2	4.01193e-71	99						no IPS match	no IPS match	no IPS match
HY10052_c3_g5_i1	probable methyltransferase At1g27930	857	20	4.05496e-146	85	4	F:GO:0008168; C:GO:0016021; P:GO:0032259; P:GO:0045492	F:methyltransferase activity; C:integral component of membrane; P:methylation; P:xylan biosynthetic process			IPR021148 (PFAM); G3DSA:3.40.50.150 (GENE3D); IPR006514 (TIGRFAM); IPR006514 (PANTHER); PTHR31444:SF1 (PANTHER)	P:GO:0045492	P:xylan biosynthetic process
HY10052_c4_g1_i1	---NA---	791									no IPS match	no IPS match	no IPS match
HY10053_c0_g1_i1	---NA---	394									no IPS match	no IPS match	no IPS match
HY10053_c0_g1_i2	hypothetical protein CICLE_v10018192mg	1260	1	2.5379e-17	89						no IPS match	no IPS match	no IPS match
HY10053_c0_g1_i3	hypothetical protein CICLE_v10018192mg	1255	1	5.34094e-17	96						no IPS match	no IPS match	no IPS match
HY10053_c1_g1_i1	heat shock factor protein HSF30	449	2	3.2415e-35	98.5	4	F:GO:0003700; C:GO:0005634; P:GO:0006355; F:GO:0043565	F:DNA binding transcription factor activity; C:nucleus; P:regulation of transcription, DNA-templated; F:sequence-specific DNA binding			mobidb-lite (MOBIDB_LITE)	no GO terms	no GO terms
HY10053_c1_g1_i2	heat shock factor protein HSF30	327	2	4.63017e-10	100	4	F:GO:0003700; C:GO:0005634; P:GO:0006355; F:GO:0043565	F:DNA binding transcription factor activity; C:nucleus; P:regulation of transcription, DNA-templated; F:sequence-specific DNA binding			no IPS match	no IPS match	no IPS match
HY10053_c1_g1_i3	heat shock factor protein HSF30	446	2	8.42116e-37	99.5	4	F:GO:0003700; C:GO:0005634; P:GO:0006355; F:GO:0043565	F:DNA binding transcription factor activity; C:nucleus; P:regulation of transcription, DNA-templated; F:sequence-specific DNA binding			mobidb-lite (MOBIDB_LITE)	no GO terms	no GO terms
HY10053_c1_g1_i4	beta-glucosidase 12-like	832	20	4.75624e-35	89.35	3	F:GO:0004553; P:GO:0005975; C:GO:0016021	F:hydrolase activity, hydrolyzing O-glycosyl compounds; P:carbohydrate metabolic process; C:integral component of membrane			IPR001360 (PFAM); G3DSA:3.20.20.80 (GENE3D); PTHR10353:SF131 (PANTHER); IPR001360 (PANTHER); IPR017853 (SUPERFAMILY)	F:GO:0004553; P:GO:0005975	F:hydrolase activity, hydrolyzing O-glycosyl compounds; P:carbohydrate metabolic process
HY10053_c1_g1_i5	heat shock factor protein HSF30	443	2	3.07531e-36	98.5	4	F:GO:0003700; C:GO:0005634; P:GO:0006355; F:GO:0043565	F:DNA binding transcription factor activity; C:nucleus; P:regulation of transcription, DNA-templated; F:sequence-specific DNA binding			mobidb-lite (MOBIDB_LITE)	no GO terms	no GO terms
HY10053_c1_g1_i6	cyanogenic beta-glucosidase-like	633	20	8.9251e-72	86.85	3	F:GO:0004553; P:GO:0005975; C:GO:0016021	F:hydrolase activity, hydrolyzing O-glycosyl compounds; P:carbohydrate metabolic process; C:integral component of membrane			G3DSA:3.20.20.80 (GENE3D); IPR001360 (PFAM); IPR001360 (PANTHER); PTHR10353:SF81 (PANTHER); IPR017853 (SUPERFAMILY)	F:GO:0004553; P:GO:0005975	F:hydrolase activity, hydrolyzing O-glycosyl compounds; P:carbohydrate metabolic process
HY10053_c1_g1_i7	heat shock factor protein HSF30	415	2	1.63412e-26	100	4	F:GO:0003700; C:GO:0005634; P:GO:0006355; F:GO:0043565	F:DNA binding transcription factor activity; C:nucleus; P:regulation of transcription, DNA-templated; F:sequence-specific DNA binding			mobidb-lite (MOBIDB_LITE)	no GO terms	no GO terms
HY10053_c1_g1_i8	beta-glucosidase 12-like	246	20	1.9908e-10	94.35	3	F:GO:0004553; P:GO:0005975; C:GO:0016021	F:hydrolase activity, hydrolyzing O-glycosyl compounds; P:carbohydrate metabolic process; C:integral component of membrane			no IPS match	no IPS match	no IPS match
HY10053_c1_g10_i1	non-symbiotic hemoglobin 1	812	20	3.33311e-59	94.2	5	F:GO:0005344; P:GO:0015671; F:GO:0019825; F:GO:0020037; F:GO:0046872	F:oxygen carrier activity; P:oxygen transport; F:oxygen binding; F:heme binding; F:metal ion binding			G3DSA:1.10.490.10 (GENE3D); PTHR22924 (PANTHER); PTHR22924:SF54 (PANTHER); IPR000971 (PROSITE_PROFILES); IPR009050 (SUPERFAMILY)	F:GO:0020037	F:heme binding
HY10053_c1_g2_i1	heat stress transcription factor A-7a-like	1445	20	0	73.25	4	F:GO:0003700; C:GO:0005634; P:GO:0006355; F:GO:0043565	F:DNA binding transcription factor activity; C:nucleus; P:regulation of transcription, DNA-templated; F:sequence-specific DNA binding			IPR000232 (PRINTS); IPR036388 (G3DSA:1.10.10.GENE3D); IPR000232 (PFAM); PTHR10015:SF217 (PANTHER); IPR027725 (PANTHER); IPR036390 (SUPERFAMILY)	F:GO:0003700; C:GO:0005634; P:GO:0006355; F:GO:0043565	F:DNA binding transcription factor activity; C:nucleus; P:regulation of transcription, DNA-templated; F:sequence-specific DNA binding
HY10053_c1_g2_i2	heat stress transcription factor A-7a-like	1460	20	0	73.25	4	F:GO:0003700; C:GO:0005634; P:GO:0006355; F:GO:0043565	F:DNA binding transcription factor activity; C:nucleus; P:regulation of transcription, DNA-templated; F:sequence-specific DNA binding			IPR000232 (PRINTS); IPR036388 (G3DSA:1.10.10.GENE3D); IPR000232 (PFAM); PTHR10015:SF217 (PANTHER); IPR027725 (PANTHER); IPR036390 (SUPERFAMILY)	F:GO:0003700; C:GO:0005634; P:GO:0006355; F:GO:0043565	F:DNA binding transcription factor activity; C:nucleus; P:regulation of transcription, DNA-templated; F:sequence-specific DNA binding
HY10053_c1_g2_i3	heat shock factor protein HSF30-like	1579	20	0	68.5	4	F:GO:0003700; C:GO:0005634; P:GO:0006355; F:GO:0043565	F:DNA binding transcription factor activity; C:nucleus; P:regulation of transcription, DNA-templated; F:sequence-specific DNA binding			PTHR10015:SF217 (PANTHER); IPR027725 (PANTHER)	no GO terms	no GO terms
HY10053_c1_g2_i4	heat shock factor protein HSF30-like	1564	20	0	68.5	4	F:GO:0003700; C:GO:0005634; P:GO:0006355; F:GO:0043565	F:DNA binding transcription factor activity; C:nucleus; P:regulation of transcription, DNA-templated; F:sequence-specific DNA binding			PTHR10015:SF217 (PANTHER); IPR027725 (PANTHER)	no GO terms	no GO terms
HY10053_c1_g2_i5	heat stress transcription factor A-7a-like	1566	20	0	73.25	4	F:GO:0003700; C:GO:0005634; P:GO:0006355; F:GO:0043565	F:DNA binding transcription factor activity; C:nucleus; P:regulation of transcription, DNA-templated; F:sequence-specific DNA binding			IPR000232 (PRINTS); IPR036388 (G3DSA:1.10.10.GENE3D); IPR000232 (PFAM); PTHR10015:SF217 (PANTHER); IPR027725 (PANTHER); IPR036390 (SUPERFAMILY)	F:GO:0003700; C:GO:0005634; P:GO:0006355; F:GO:0043565	F:DNA binding transcription factor activity; C:nucleus; P:regulation of transcription, DNA-templated; F:sequence-specific DNA binding
HY10053_c1_g3_i1	serine/threonine-protein kinase-like protein At3g51990	2521	20	0	81.15	5	F:GO:0004675; F:GO:0005524; C:GO:0005886; P:GO:0006468; P:GO:0007178	F:transmembrane receptor protein serine/threonine kinase activity; F:ATP binding; C:plasma membrane; P:protein phosphorylation; P:transmembrane receptor protein serine/threonine kinase signaling pathway	EC:2.7.11	Transferring phosphorus-containing groups	G3DSA:1.10.510.10 (GENE3D); IPR001245 (PFAM); G3DSA:3.30.200.20 (GENE3D); PIRSF000654 (PIRSF); mobidb-lite (MOBIDB_LITE); mobidb-lite (MOBIDB_LITE); PTHR27001:SF213 (PANTHER); PTHR27001 (PANTHER); IPR000719 (PROSITE_PROFILES); IPR011009 (SUPERFAMILY)	F:GO:0004672; F:GO:0005524; P:GO:0006468	F:protein kinase activity; F:ATP binding; P:protein phosphorylation
HY10053_c1_g4_i1	heat shock factor protein HSF30-like	1492	20	0	72.2	4	F:GO:0003700; C:GO:0005634; P:GO:0006355; F:GO:0043565	F:DNA binding transcription factor activity; C:nucleus; P:regulation of transcription, DNA-templated; F:sequence-specific DNA binding			IPR000232 (PRINTS); IPR036388 (G3DSA:1.10.10.GENE3D); IPR000232 (PFAM); PTHR10015:SF217 (PANTHER); IPR027725 (PANTHER); IPR036390 (SUPERFAMILY)	F:GO:0003700; C:GO:0005634; P:GO:0006355; F:GO:0043565	F:DNA binding transcription factor activity; C:nucleus; P:regulation of transcription, DNA-templated; F:sequence-specific DNA binding
HY10053_c1_g4_i2	heat shock factor protein HSF30-like	1505	20	0	68.5	4	F:GO:0003700; C:GO:0005634; P:GO:0006355; F:GO:0043565	F:DNA binding transcription factor activity; C:nucleus; P:regulation of transcription, DNA-templated; F:sequence-specific DNA binding			PTHR10015:SF217 (PANTHER); IPR027725 (PANTHER)	no GO terms	no GO terms
HY10053_c1_g4_i3	heat shock factor protein HSF30-like	1386	20	0	72.2	4	F:GO:0003700; C:GO:0005634; P:GO:0006355; F:GO:0043565	F:DNA binding transcription factor activity; C:nucleus; P:regulation of transcription, DNA-templated; F:sequence-specific DNA binding			IPR000232 (PRINTS); IPR036388 (G3DSA:1.10.10.GENE3D); IPR000232 (PFAM); PTHR10015:SF217 (PANTHER); IPR027725 (PANTHER); IPR036390 (SUPERFAMILY)	F:GO:0003700; C:GO:0005634; P:GO:0006355; F:GO:0043565	F:DNA binding transcription factor activity; C:nucleus; P:regulation of transcription, DNA-templated; F:sequence-specific DNA binding
HY10053_c1_g4_i4	heat shock factor protein HSF30-like	1371	20	0	72.2	4	F:GO:0003700; C:GO:0005634; P:GO:0006355; F:GO:0043565	F:DNA binding transcription factor activity; C:nucleus; P:regulation of transcription, DNA-templated; F:sequence-specific DNA binding			IPR000232 (PRINTS); IPR036388 (G3DSA:1.10.10.GENE3D); IPR000232 (PFAM); PTHR10015:SF217 (PANTHER); IPR027725 (PANTHER); IPR036390 (SUPERFAMILY)	F:GO:0003700; C:GO:0005634; P:GO:0006355; F:GO:0043565	F:DNA binding transcription factor activity; C:nucleus; P:regulation of transcription, DNA-templated; F:sequence-specific DNA binding
HY10053_c1_g4_i5	heat shock factor protein HSF30-like	1490	20	0	68.5	4	F:GO:0003700; C:GO:0005634; P:GO:0006355; F:GO:0043565	F:DNA binding transcription factor activity; C:nucleus; P:regulation of transcription, DNA-templated; F:sequence-specific DNA binding			PTHR10015:SF217 (PANTHER); IPR027725 (PANTHER)	no GO terms	no GO terms
HY10053_c1_g5_i1	sperm-associated antigen 1	1791	20	1.39195e-166	75.75	1	F:GO:0005515	F:protein binding			IPR011990 (G3DSA:1.25.40.GENE3D); G3DSA:1.20.58.280 (GENE3D); IPR011990 (G3DSA:1.25.40.GENE3D); IPR011990 (G3DSA:1.25.40.GENE3D); mobidb-lite (MOBIDB_LITE); PTHR22904:SF275 (PANTHER); PTHR22904 (PANTHER); IPR013026 (PROSITE_PROFILES); IPR011990 (SUPERFAMILY)	F:GO:0005515	F:protein binding
HY10053_c1_g5_i2	sperm-associated antigen 1	1443	20	1.67466e-66	73.5	2	C:GO:0016020; C:GO:0016021	C:membrane; C:integral component of membrane			mobidb-lite (MOBIDB_LITE)	no GO terms	no GO terms
HY10053_c1_g5_i3	sperm-associated antigen 1	2669	20	7.90621e-91	90.6	1	F:GO:0005515	F:protein binding			G3DSA:1.10.150.160 (GENE3D); PTHR22904 (PANTHER); PTHR22904:SF275 (PANTHER); IPR011990 (SUPERFAMILY)	F:GO:0005515	F:protein binding
HY10053_c1_g5_i4	sperm-associated antigen 1	1817	20	1.88758e-166	75.75	1	F:GO:0005515	F:protein binding			IPR011990 (G3DSA:1.25.40.GENE3D); G3DSA:1.20.58.280 (GENE3D); IPR011990 (G3DSA:1.25.40.GENE3D); IPR011990 (G3DSA:1.25.40.GENE3D); mobidb-lite (MOBIDB_LITE); PTHR22904:SF275 (PANTHER); PTHR22904 (PANTHER); IPR013026 (PROSITE_PROFILES); IPR011990 (SUPERFAMILY)	F:GO:0005515	F:protein binding
HY10053_c1_g5_i5	sperm-associated antigen 1	1591	20	5.55558e-68	73.5	2	C:GO:0016020; C:GO:0016021	C:membrane; C:integral component of membrane			mobidb-lite (MOBIDB_LITE)	no GO terms	no GO terms
HY10053_c1_g5_i6	sperm-associated antigen 1	1417	20	1.3233e-66	73.5	2	C:GO:0016020; C:GO:0016021	C:membrane; C:integral component of membrane			mobidb-lite (MOBIDB_LITE)	no GO terms	no GO terms
HY10053_c1_g5_i7	---NA---	277									no IPS match	no IPS match	no IPS match
HY10053_c1_g5_i8	sperm-associated antigen 1	1565	20	4.45078e-68	73.5	2	C:GO:0016020; C:GO:0016021	C:membrane; C:integral component of membrane			mobidb-lite (MOBIDB_LITE)	no GO terms	no GO terms
HY10053_c1_g5_i9	sperm-associated antigen 1	2643	20	7.85153e-91	90.6	1	F:GO:0005515	F:protein binding			G3DSA:1.10.150.160 (GENE3D); PTHR22904 (PANTHER); PTHR22904:SF275 (PANTHER); IPR011990 (SUPERFAMILY)	F:GO:0005515	F:protein binding
HY10053_c1_g6_i1	non-symbiotic hemoglobin 1	711	20	1.46897e-112	93.35	7	F:GO:0005344; C:GO:0005737; P:GO:0015671; C:GO:0016363; F:GO:0019825; F:GO:0020037; F:GO:0046872	F:oxygen carrier activity; C:cytoplasm; P:oxygen transport; C:nuclear matrix; F:oxygen binding; F:heme binding; F:metal ion binding			IPR001032 (PRINTS); IPR000971 (PFAM); G3DSA:1.10.490.10 (GENE3D); PTHR22924:SF54 (PANTHER); PTHR22924 (PANTHER); IPR000971 (PROSITE_PROFILES); cd14784 (CDD); IPR009050 (SUPERFAMILY)	F:GO:0019825; F:GO:0020037	F:oxygen binding; F:heme binding
HY10053_c1_g7_i1	---NA---	277									no IPS match	no IPS match	no IPS match
HY10053_c1_g7_i2	anaphase-promoting complex subunit 6-like	1057	20	1.67636e-92	56.45						IPR012442 (PFAM); mobidb-lite (MOBIDB_LITE); mobidb-lite (MOBIDB_LITE); PTHR33095 (PANTHER); PTHR33095:SF41 (PANTHER)	no GO terms	no GO terms
HY10053_c1_g8_i1	non-symbiotic hemoglobin 1	563	20	1.57319e-59	94.2	5	F:GO:0005344; P:GO:0015671; F:GO:0019825; F:GO:0020037; F:GO:0046872	F:oxygen carrier activity; P:oxygen transport; F:oxygen binding; F:heme binding; F:metal ion binding			G3DSA:1.10.490.10 (GENE3D); PTHR22924:SF54 (PANTHER); PTHR22924 (PANTHER); IPR000971 (PROSITE_PROFILES); IPR009050 (SUPERFAMILY)	F:GO:0020037	F:heme binding
HY10053_c1_g9_i1	non-symbiotic hemoglobin 1	711	20	9.58492e-114	92.8	8	F:GO:0005344; C:GO:0005737; P:GO:0009399; P:GO:0015671; C:GO:0016363; F:GO:0019825; F:GO:0020037; F:GO:0046872	F:oxygen carrier activity; C:cytoplasm; P:nitrogen fixation; P:oxygen transport; C:nuclear matrix; F:oxygen binding; F:heme binding; F:metal ion binding			IPR001032 (PRINTS); G3DSA:1.10.490.10 (GENE3D); IPR000971 (PFAM); PTHR22924 (PANTHER); PTHR22924:SF54 (PANTHER); IPR000971 (PROSITE_PROFILES); cd14784 (CDD); IPR009050 (SUPERFAMILY)	F:GO:0019825; F:GO:0020037	F:oxygen binding; F:heme binding
HY10054_c0_g1_i1	---NA---	207									no IPS match	no IPS match	no IPS match
HY10054_c1_g1_i1	---NA---	334									no IPS match	no IPS match	no IPS match
HY10054_c2_g1_i1	hypothetical protein CICLE_v10033778mg	514	7	1.0488e-26	74.86	1	C:GO:0016021	C:integral component of membrane			no IPS match	no IPS match	no IPS match
HY10054_c2_g2_i1	hypothetical protein CICLE_v10033778mg	724	1	0.000105442	100	2	C:GO:0016020; C:GO:0016021	C:membrane; C:integral component of membrane			no IPS match	no IPS match	no IPS match
HY10054_c2_g2_i2	hypothetical protein CICLE_v10033778mg	202	2	7.10868e-06	88.5	2	C:GO:0016020; C:GO:0016021	C:membrane; C:integral component of membrane			PTHR33726 (PANTHER); PTHR33726:SF8 (PANTHER)	no GO terms	no GO terms
HY10054_c3_g1_i1	---NA---	390									no IPS match	no IPS match	no IPS match
HY10054_c3_g1_i2	---NA---	741									no IPS match	no IPS match	no IPS match
HY10054_c3_g2_i1	protein phosphatase 2C 56-like	548	20	6.59547e-80	84.6	4	F:GO:0004722; P:GO:0006470; C:GO:0016021; F:GO:0046872	F:protein serine/threonine phosphatase activity; P:protein dephosphorylation; C:integral component of membrane; F:metal ion binding	EC:3.1.3.16; EC:3.1.3.41	Protein-serine/threonine phosphatase; 4-nitrophenylphosphatase	IPR036457 (G3DSA:3.60.40.GENE3D); PTHR13832:SF357 (PANTHER); IPR015655 (PANTHER); IPR036457 (SUPERFAMILY)	F:GO:0004722; P:GO:0006470	F:protein serine/threonine phosphatase activity; P:protein dephosphorylation
HY10054_c4_g1_i1	---NA---	365									no IPS match	no IPS match	no IPS match
HY10054_c4_g2_i1	---NA---	542									no IPS match	no IPS match	no IPS match
HY10054_c4_g3_i1	protein NUCLEAR FUSION DEFECTIVE 6, chloroplastic/mitochondrial isoform X3	581	20	5.89802e-39	83.15						mobidb-lite (MOBIDB_LITE); PTHR33156:SF9 (PANTHER); PTHR33156 (PANTHER)	no GO terms	no GO terms
HY10054_c4_g4_i1	---NA---	637									no IPS match	no IPS match	no IPS match
HY10054_c5_g1_i1	sterol 14-demethylase-like	1990	20	0	94.65	11	F:GO:0005506; C:GO:0005783; C:GO:0005886; F:GO:0008168; F:GO:0008398; C:GO:0016021; P:GO:0016126; F:GO:0020037; P:GO:0032259; P:GO:0055114; P:GO:0070988	F:iron ion binding; C:endoplasmic reticulum; C:plasma membrane; F:methyltransferase activity; F:sterol 14-demethylase activity; C:integral component of membrane; P:sterol biosynthetic process; F:heme binding; P:methylation; P:oxidation-reduction process; P:demethylation	EC:1.14.13.70; EC:1.14.13	Sterol 14-alpha-demethylase; Acting on paired donors, with incorporation or reduction of molecular oxygen. The oxygen incorporated need not be derived from O(2)	IPR002403 (PRINTS); IPR001128 (PRINTS); IPR036396 (G3DSA:1.10.630.GENE3D); IPR001128 (PFAM); PTHR24286:SF58 (PANTHER); PTHR24286 (PANTHER); IPR036396 (SUPERFAMILY)	F:GO:0004497; F:GO:0005506; F:GO:0016705; F:GO:0020037; P:GO:0055114	F:monooxygenase activity; F:iron ion binding; F:oxidoreductase activity, acting on paired donors, with incorporation or reduction of molecular oxygen; F:heme binding; P:oxidation-reduction process
HY10054_c5_g1_i2	sterol 14-demethylase-like	2173	20	0	94.7	11	F:GO:0005506; C:GO:0005783; C:GO:0005886; F:GO:0008168; F:GO:0008398; C:GO:0016021; P:GO:0016126; F:GO:0020037; P:GO:0032259; P:GO:0055114; P:GO:0070988	F:iron ion binding; C:endoplasmic reticulum; C:plasma membrane; F:methyltransferase activity; F:sterol 14-demethylase activity; C:integral component of membrane; P:sterol biosynthetic process; F:heme binding; P:methylation; P:oxidation-reduction process; P:demethylation	EC:1.14.13.70; EC:1.14.13	Sterol 14-alpha-demethylase; Acting on paired donors, with incorporation or reduction of molecular oxygen. The oxygen incorporated need not be derived from O(2)	IPR002403 (PRINTS); IPR001128 (PRINTS); IPR001128 (PFAM); IPR036396 (G3DSA:1.10.630.GENE3D); PTHR24286:SF58 (PANTHER); PTHR24286 (PANTHER); IPR036396 (SUPERFAMILY)	F:GO:0004497; F:GO:0005506; F:GO:0016705; F:GO:0020037; P:GO:0055114	F:monooxygenase activity; F:iron ion binding; F:oxidoreductase activity, acting on paired donors, with incorporation or reduction of molecular oxygen; F:heme binding; P:oxidation-reduction process
HY10054_c6_g1_i1	---NA---	222									no IPS match	no IPS match	no IPS match
HY10055_c0_g1_i1	Nuclear factor related to kappa-B-binding protein	3255	20	0	65.15	1	C:GO:0031011	C:Ino80 complex			mobidb-lite (MOBIDB_LITE); IPR024867 (PANTHER); PTHR13052:SF1 (PANTHER)	C:GO:0031011	C:Ino80 complex
HY10055_c0_g1_i2	Nuclear factor related to kappa-B-binding protein	2713	20	0	65.15	1	C:GO:0031011	C:Ino80 complex			mobidb-lite (MOBIDB_LITE); IPR024867 (PANTHER); PTHR13052:SF1 (PANTHER)	C:GO:0031011	C:Ino80 complex
HY10055_c0_g1_i3	Nuclear factor related to kappa-B-binding protein	2731	20	0	65.15	1	C:GO:0031011	C:Ino80 complex			mobidb-lite (MOBIDB_LITE); IPR024867 (PANTHER); PTHR13052:SF1 (PANTHER)	C:GO:0031011	C:Ino80 complex
HY10056_c0_g1_i1	adoMet-dependent rRNA methyltransferase spb1	451	16	4.08573e-08	86.19	2	P:GO:0001510; F:GO:0008168	P:RNA methylation; F:methyltransferase activity			no IPS match	no IPS match	no IPS match
HY10056_c0_g1_i2	adoMet-dependent rRNA methyltransferase spb1	486	20	2.84084e-08	86.25	2	P:GO:0001510; F:GO:0008168	P:RNA methylation; F:methyltransferase activity			no IPS match	no IPS match	no IPS match
HY10056_c0_g2_i1	protein FIZZY-RELATED 3	1284	20	0	95.9	3	F:GO:0010997; F:GO:0097027; P:GO:1904668	F:anaphase-promoting complex binding; F:ubiquitin-protein transferase activator activity; P:positive regulation of ubiquitin protein ligase activity			IPR001680 (PFAM); IPR015943 (G3DSA:2.130.10.GENE3D); PTHR19918:SF31 (PANTHER); IPR033010 (PANTHER); IPR001680 (PROSITE_PROFILES); IPR017986 (PROSITE_PROFILES); IPR001680 (PROSITE_PROFILES); IPR036322 (SUPERFAMILY)	F:GO:0005515; F:GO:0010997; F:GO:0097027; P:GO:1904668	F:protein binding; F:anaphase-promoting complex binding; F:ubiquitin-protein transferase activator activity; P:positive regulation of ubiquitin protein ligase activity
HY10056_c0_g2_i10	protein FIZZY-RELATED 3	1670	20	0	95.6	3	F:GO:0010997; F:GO:0097027; P:GO:1904668	F:anaphase-promoting complex binding; F:ubiquitin-protein transferase activator activity; P:positive regulation of ubiquitin protein ligase activity			IPR001680 (PFAM); IPR015943 (G3DSA:2.130.10.GENE3D); PTHR19918:SF31 (PANTHER); IPR033010 (PANTHER); IPR017986 (PROSITE_PROFILES); IPR001680 (PROSITE_PROFILES); IPR001680 (PROSITE_PROFILES); IPR001680 (PROSITE_PROFILES); IPR036322 (SUPERFAMILY)	F:GO:0005515; F:GO:0010997; F:GO:0097027; P:GO:1904668	F:protein binding; F:anaphase-promoting complex binding; F:ubiquitin-protein transferase activator activity; P:positive regulation of ubiquitin protein ligase activity
HY10056_c0_g2_i11	ribosomal RNA large subunit methyltransferase E	465	20	1.83158e-17	91.75	2	F:GO:0008650; P:GO:0031167	F:rRNA (uridine-2'-O-)-methyltransferase activity; P:rRNA methylation			G3DSA:3.40.50.150 (GENE3D)	no GO terms	no GO terms
HY10056_c0_g2_i2	---NA---	449									no IPS match	no IPS match	no IPS match
HY10056_c0_g2_i3	protein FIZZY-RELATED 3	2747	20	0	90.55	3	F:GO:0010997; F:GO:0097027; P:GO:1904668	F:anaphase-promoting complex binding; F:ubiquitin-protein transferase activator activity; P:positive regulation of ubiquitin protein ligase activity			IPR015943 (G3DSA:2.130.10.GENE3D); IPR001680 (PFAM); mobidb-lite (MOBIDB_LITE); PTHR19918:SF31 (PANTHER); IPR033010 (PANTHER); IPR001680 (PROSITE_PROFILES); IPR001680 (PROSITE_PROFILES); IPR017986 (PROSITE_PROFILES); IPR001680 (PROSITE_PROFILES); cd00200 (CDD); IPR011047 (SUPERFAMILY)	F:GO:0005515; F:GO:0010997; F:GO:0097027; P:GO:1904668	F:protein binding; F:anaphase-promoting complex binding; F:ubiquitin-protein transferase activator activity; P:positive regulation of ubiquitin protein ligase activity
HY10056_c0_g2_i4	---NA---	461									no IPS match	no IPS match	no IPS match
HY10056_c0_g2_i5	protein FIZZY-RELATED 3	1984	20	0	95.6	3	F:GO:0010997; F:GO:0097027; P:GO:1904668	F:anaphase-promoting complex binding; F:ubiquitin-protein transferase activator activity; P:positive regulation of ubiquitin protein ligase activity			IPR001680 (PFAM); IPR015943 (G3DSA:2.130.10.GENE3D); PTHR19918:SF31 (PANTHER); IPR033010 (PANTHER); IPR017986 (PROSITE_PROFILES); IPR001680 (PROSITE_PROFILES); IPR001680 (PROSITE_PROFILES); IPR001680 (PROSITE_PROFILES); IPR036322 (SUPERFAMILY)	F:GO:0005515; F:GO:0010997; F:GO:0097027; P:GO:1904668	F:protein binding; F:anaphase-promoting complex binding; F:ubiquitin-protein transferase activator activity; P:positive regulation of ubiquitin protein ligase activity
HY10056_c0_g2_i6	protein FIZZY-RELATED 3	2884	20	0	89.1	3	F:GO:0010997; F:GO:0097027; P:GO:1904668	F:anaphase-promoting complex binding; F:ubiquitin-protein transferase activator activity; P:positive regulation of ubiquitin protein ligase activity			IPR015943 (G3DSA:2.130.10.GENE3D); mobidb-lite (MOBIDB_LITE); IPR033010 (PANTHER); PTHR19918:SF31 (PANTHER); IPR017986 (PROSITE_PROFILES); IPR001680 (PROSITE_PROFILES); IPR036322 (SUPERFAMILY)	F:GO:0005515; F:GO:0010997; F:GO:0097027; P:GO:1904668	F:protein binding; F:anaphase-promoting complex binding; F:ubiquitin-protein transferase activator activity; P:positive regulation of ubiquitin protein ligase activity
HY10056_c0_g2_i7	protein FIZZY-RELATED 3	1403	20	4.86324e-172	95.4	3	F:GO:0010997; F:GO:0097027; P:GO:1904668	F:anaphase-promoting complex binding; F:ubiquitin-protein transferase activator activity; P:positive regulation of ubiquitin protein ligase activity			IPR015943 (G3DSA:2.130.10.GENE3D); IPR015943 (G3DSA:2.130.10.GENE3D); G3DSA:1.10.10.670 (GENE3D); IPR015943 (G3DSA:2.130.10.GENE3D); IPR001680 (PFAM); PTHR19918:SF31 (PANTHER); IPR033010 (PANTHER); IPR001680 (PROSITE_PROFILES); IPR017986 (PROSITE_PROFILES); IPR001680 (PROSITE_PROFILES); IPR036322 (SUPERFAMILY)	F:GO:0005515; F:GO:0010997; F:GO:0097027; P:GO:1904668	F:protein binding; F:anaphase-promoting complex binding; F:ubiquitin-protein transferase activator activity; P:positive regulation of ubiquitin protein ligase activity
HY10056_c0_g2_i8	protein FIZZY-RELATED 3	2848	20	0	89.1	3	F:GO:0010997; F:GO:0097027; P:GO:1904668	F:anaphase-promoting complex binding; F:ubiquitin-protein transferase activator activity; P:positive regulation of ubiquitin protein ligase activity			IPR015943 (G3DSA:2.130.10.GENE3D); mobidb-lite (MOBIDB_LITE); IPR033010 (PANTHER); PTHR19918:SF31 (PANTHER); IPR017986 (PROSITE_PROFILES); IPR001680 (PROSITE_PROFILES); IPR036322 (SUPERFAMILY)	F:GO:0005515; F:GO:0010997; F:GO:0097027; P:GO:1904668	F:protein binding; F:anaphase-promoting complex binding; F:ubiquitin-protein transferase activator activity; P:positive regulation of ubiquitin protein ligase activity
HY10056_c0_g2_i9	protein FIZZY-RELATED 3	2783	20	0	90.55	3	F:GO:0010997; F:GO:0097027; P:GO:1904668	F:anaphase-promoting complex binding; F:ubiquitin-protein transferase activator activity; P:positive regulation of ubiquitin protein ligase activity			IPR015943 (G3DSA:2.130.10.GENE3D); IPR001680 (PFAM); mobidb-lite (MOBIDB_LITE); PTHR19918:SF31 (PANTHER); IPR033010 (PANTHER); IPR001680 (PROSITE_PROFILES); IPR001680 (PROSITE_PROFILES); IPR017986 (PROSITE_PROFILES); IPR001680 (PROSITE_PROFILES); cd00200 (CDD); IPR011047 (SUPERFAMILY)	F:GO:0005515; F:GO:0010997; F:GO:0097027; P:GO:1904668	F:protein binding; F:anaphase-promoting complex binding; F:ubiquitin-protein transferase activator activity; P:positive regulation of ubiquitin protein ligase activity
HY10057_c0_g1_i1	ATPase subunit 6 (mitochondrion)	1937	20	1.52464e-71	94.45	5	C:GO:0005743; F:GO:0015078; P:GO:0015986; C:GO:0016021; C:GO:0045263	C:mitochondrial inner membrane; F:proton transmembrane transporter activity; P:ATP synthesis coupled proton transport; C:integral component of membrane; C:proton-transporting ATP synthase complex, coupling factor F(o)			IPR000568 (PRINTS); IPR000568 (TIGRFAM); IPR035908 (G3DSA:1.20.120.GENE3D); IPR000568 (PFAM); PTHR11410 (PANTHER); IPR035908 (SUPERFAMILY)	F:GO:0015078; P:GO:0015986; C:GO:0045263	F:proton transmembrane transporter activity; P:ATP synthesis coupled proton transport; C:proton-transporting ATP synthase complex, coupling factor F(o)
HY10057_c0_g1_i2	cytochrome c oxidase subunit 2 (mitochondrion)	1576	20	2.40416e-74	95.75	7	F:GO:0004129; F:GO:0005507; C:GO:0005743; C:GO:0016021; P:GO:0022900; C:GO:0070469; P:GO:1902600	F:cytochrome-c oxidase activity; F:copper ion binding; C:mitochondrial inner membrane; C:integral component of membrane; P:electron transport chain; C:respiratory chain; P:proton transmembrane transport	EC:1.9.3.1	Cytochrome-c oxidase	PR01166 (PRINTS); IPR002429 (PFAM); G3DSA:1.10.287.90 (GENE3D); IPR011759 (PFAM); IPR008972 (G3DSA:2.60.40.GENE3D); PTHR22888:SF9 (PANTHER); PTHR22888 (PANTHER); IPR002429 (PROSITE_PROFILES); IPR011759 (PROSITE_PROFILES); IPR008972 (SUPERFAMILY); IPR036257 (SUPERFAMILY)	F:GO:0004129; F:GO:0005507; C:GO:0016020; C:GO:0016021; P:GO:0022900	F:cytochrome-c oxidase activity; F:copper ion binding; C:membrane; C:integral component of membrane; P:electron transport chain
HY10057_c0_g2_i1	NADH dehydrogenase subunit 9 (mitochondrion)	1762	20	4.69472e-112	97.7	4	C:GO:0005743; F:GO:0008137; P:GO:0055114; C:GO:0070469	C:mitochondrial inner membrane; F:NADH dehydrogenase (ubiquinone) activity; P:oxidation-reduction process; C:respiratory chain	EC:1.6.99.5; EC:1.6.99.3; EC:1.6.5.3	Acting on NADH or NADPH; NADH dehydrogenase; NADH:ubiquinone reductase (H(+)-translocating)	IPR001268 (PFAM); IPR010218 (TIGRFAM); PTHR10884 (PANTHER); PTHR10884:SF10 (PANTHER); IPR001268 (PRODOM); IPR010218 (HAMAP); IPR037232 (SUPERFAMILY)	F:GO:0008137; F:GO:0016651; P:GO:0055114	F:NADH dehydrogenase (ubiquinone) activity; F:oxidoreductase activity, acting on NAD(P)H; P:oxidation-reduction process
HY10057_c0_g2_i2	NADH dehydrogenase subunit 9 (mitochondrion)	2601	20	2.75577e-137	97.8	4	C:GO:0005743; F:GO:0008137; P:GO:0055114; C:GO:0070469	C:mitochondrial inner membrane; F:NADH dehydrogenase (ubiquinone) activity; P:oxidation-reduction process; C:respiratory chain	EC:1.6.99.5; EC:1.6.99.3; EC:1.6.5.3	Acting on NADH or NADPH; NADH dehydrogenase; NADH:ubiquinone reductase (H(+)-translocating)	IPR010218 (TIGRFAM); IPR001268 (PFAM); PTHR10884:SF10 (PANTHER); PTHR10884 (PANTHER); IPR001268 (PRODOM); IPR010218 (HAMAP); IPR037232 (SUPERFAMILY)	F:GO:0008137; F:GO:0016651; P:GO:0055114	F:NADH dehydrogenase (ubiquinone) activity; F:oxidoreductase activity, acting on NAD(P)H; P:oxidation-reduction process
HY10057_c0_g2_i3	NADH dehydrogenase subunit 9 (mitochondrion)	281	20	2.59721e-18	89.95	4	C:GO:0005743; F:GO:0008137; P:GO:0055114; C:GO:0070469	C:mitochondrial inner membrane; F:NADH dehydrogenase (ubiquinone) activity; P:oxidation-reduction process; C:respiratory chain	EC:1.6.99.5; EC:1.6.99.3; EC:1.6.5.3	Acting on NADH or NADPH; NADH dehydrogenase; NADH:ubiquinone reductase (H(+)-translocating)	no IPS match	no IPS match	no IPS match
HY10057_c0_g3_i1	endoplasmic reticulum metallopeptidase 1	957	20	2.4522e-09	90.05	1	C:GO:0016021	C:integral component of membrane			no IPS match	no IPS match	no IPS match
HY10057_c0_g4_i1	ATPase subunit 6 (mitochondrion)	564	20	1.34086e-59	94.05	5	C:GO:0005743; F:GO:0015078; P:GO:0015986; C:GO:0016021; C:GO:0045263	C:mitochondrial inner membrane; F:proton transmembrane transporter activity; P:ATP synthesis coupled proton transport; C:integral component of membrane; C:proton-transporting ATP synthase complex, coupling factor F(o)			IPR035908 (G3DSA:1.20.120.GENE3D); IPR000568 (PFAM); PTHR11410 (PANTHER); IPR035908 (SUPERFAMILY)	F:GO:0015078; P:GO:0015986; C:GO:0045263	F:proton transmembrane transporter activity; P:ATP synthesis coupled proton transport; C:proton-transporting ATP synthase complex, coupling factor F(o)
HY10057_c0_g4_i2	ATPase subunit 6 (mitochondrion)	563	20	1.15444e-49	92.85	5	C:GO:0005743; F:GO:0015078; P:GO:0015986; C:GO:0016021; C:GO:0045263	C:mitochondrial inner membrane; F:proton transmembrane transporter activity; P:ATP synthesis coupled proton transport; C:integral component of membrane; C:proton-transporting ATP synthase complex, coupling factor F(o)			IPR035908 (G3DSA:1.20.120.GENE3D); IPR000568 (PFAM); PTHR11410 (PANTHER); IPR035908 (SUPERFAMILY)	F:GO:0015078; P:GO:0015986; C:GO:0045263	F:proton transmembrane transporter activity; P:ATP synthesis coupled proton transport; C:proton-transporting ATP synthase complex, coupling factor F(o)
HY10057_c0_g5_i1	cytochrome c1-2, heme protein, mitochondrial-like isoform X1	729	20	1.7147e-09	87.6	5	F:GO:0008121; C:GO:0016021; F:GO:0020037; P:GO:0022900; F:GO:0046872	F:ubiquinol-cytochrome-c reductase activity; C:integral component of membrane; F:heme binding; P:electron transport chain; F:metal ion binding	EC:1.10.2; EC:1.10.2.2	Acting on diphenols and related substances as donors; Quinol--cytochrome-c reductase	no IPS match	no IPS match	no IPS match
HY10058_c0_g1_i1	chaperone protein DnaJ isoform X1	4072	20	4.53353e-172	88.1	7	F:GO:0005524; P:GO:0006457; P:GO:0009408; C:GO:0016021; F:GO:0031072; F:GO:0046872; F:GO:0051082	F:ATP binding; P:protein folding; P:response to heat; C:integral component of membrane; F:heat shock protein binding; F:metal ion binding; F:unfolded protein binding			IPR001623 (PRINTS); IPR001623 (PFAM); IPR001305 (PFAM); IPR002939 (PFAM); G3DSA:2.60.260.20 (GENE3D); IPR036869 (G3DSA:1.10.287.GENE3D); PTHR43096 (PANTHER); PTHR43096:SF26 (PANTHER); IPR001305 (PROSITE_PROFILES); IPR001623 (PROSITE_PROFILES); IPR001623 (CDD); IPR001305 (CDD); IPR036410 (SUPERFAMILY); IPR008971 (SUPERFAMILY); IPR036869 (SUPERFAMILY)	P:GO:0006457; F:GO:0031072; F:GO:0051082	P:protein folding; F:heat shock protein binding; F:unfolded protein binding
HY10058_c0_g1_i10	chaperone protein DnaJ isoform X1	5191	20	5.32235e-141	89.4	7	F:GO:0005524; P:GO:0006457; P:GO:0009408; C:GO:0016021; F:GO:0031072; F:GO:0046872; F:GO:0051082	F:ATP binding; P:protein folding; P:response to heat; C:integral component of membrane; F:heat shock protein binding; F:metal ion binding; F:unfolded protein binding			G3DSA:2.10.230.10 (GENE3D); G3DSA:2.10.230.10 (GENE3D); IPR002939 (PFAM); IPR001305 (PFAM); PTHR43096:SF26 (PANTHER); PTHR43096 (PANTHER); IPR001305 (PROSITE_PROFILES); IPR001305 (CDD); IPR008971 (SUPERFAMILY); IPR036410 (SUPERFAMILY)	P:GO:0006457; F:GO:0031072; F:GO:0051082	P:protein folding; F:heat shock protein binding; F:unfolded protein binding
HY10058_c0_g1_i11	chaperone protein DnaJ isoform X1	4352	20	2.77862e-148	87.75	7	F:GO:0005524; P:GO:0006457; P:GO:0009408; C:GO:0016021; F:GO:0031072; F:GO:0046872; F:GO:0051082	F:ATP binding; P:protein folding; P:response to heat; C:integral component of membrane; F:heat shock protein binding; F:metal ion binding; F:unfolded protein binding			G3DSA:2.60.260.20 (GENE3D); IPR002939 (PFAM); PTHR43096 (PANTHER); PTHR43096:SF26 (PANTHER); cd10747 (CDD); IPR008971 (SUPERFAMILY)	P:GO:0006457; F:GO:0051082	P:protein folding; F:unfolded protein binding
HY10058_c0_g1_i12	chaperone protein DnaJ isoform X1	3058	20	3.49074e-152	87	7	F:GO:0005524; P:GO:0006457; P:GO:0009408; C:GO:0016021; F:GO:0031072; F:GO:0046872; F:GO:0051082	F:ATP binding; P:protein folding; P:response to heat; C:integral component of membrane; F:heat shock protein binding; F:metal ion binding; F:unfolded protein binding			G3DSA:2.60.260.20 (GENE3D); IPR002939 (PFAM); PTHR43096 (PANTHER); PTHR43096:SF26 (PANTHER); cd10747 (CDD); IPR008971 (SUPERFAMILY)	P:GO:0006457; F:GO:0051082	P:protein folding; F:unfolded protein binding
HY10058_c0_g1_i13	chaperone protein DnaJ isoform X1	4167	20	8.84455e-172	88.3	7	F:GO:0005524; P:GO:0006457; P:GO:0009408; C:GO:0016021; F:GO:0031072; F:GO:0046872; F:GO:0051082	F:ATP binding; P:protein folding; P:response to heat; C:integral component of membrane; F:heat shock protein binding; F:metal ion binding; F:unfolded protein binding			IPR001623 (PRINTS); IPR001623 (PFAM); IPR001305 (PFAM); IPR002939 (PFAM); G3DSA:2.60.260.20 (GENE3D); IPR036869 (G3DSA:1.10.287.GENE3D); PTHR43096 (PANTHER); PTHR43096:SF26 (PANTHER); IPR001305 (PROSITE_PROFILES); IPR001623 (PROSITE_PROFILES); IPR001623 (CDD); IPR001305 (CDD); IPR036410 (SUPERFAMILY); IPR008971 (SUPERFAMILY); IPR036869 (SUPERFAMILY)	P:GO:0006457; F:GO:0031072; F:GO:0051082	P:protein folding; F:heat shock protein binding; F:unfolded protein binding
HY10058_c0_g1_i14	UBN2_3 domain-containing protein	1420	20	7.23147e-06	65.1	5	P:GO:0006457; C:GO:0016020; C:GO:0016021; F:GO:0031072; F:GO:0051082	P:protein folding; C:membrane; C:integral component of membrane; F:heat shock protein binding; F:unfolded protein binding			no IPS match	no IPS match	no IPS match
HY10058_c0_g1_i2	chaperone protein DnaJ isoform X1	5180	20	4.52542e-169	87.25	7	F:GO:0005524; P:GO:0006457; P:GO:0009408; C:GO:0016021; F:GO:0031072; F:GO:0046872; F:GO:0051082	F:ATP binding; P:protein folding; P:response to heat; C:integral component of membrane; F:heat shock protein binding; F:metal ion binding; F:unfolded protein binding			IPR001623 (PRINTS); IPR001623 (PFAM); IPR001305 (PFAM); IPR002939 (PFAM); G3DSA:2.60.260.20 (GENE3D); IPR036869 (G3DSA:1.10.287.GENE3D); PTHR43096 (PANTHER); PTHR43096:SF26 (PANTHER); IPR001305 (PROSITE_PROFILES); IPR001623 (PROSITE_PROFILES); IPR001623 (CDD); IPR001305 (CDD); IPR036410 (SUPERFAMILY); IPR008971 (SUPERFAMILY); IPR036869 (SUPERFAMILY)	P:GO:0006457; F:GO:0031072; F:GO:0051082	P:protein folding; F:heat shock protein binding; F:unfolded protein binding
HY10058_c0_g1_i3	chaperone protein DnaJ isoform X2	3410	20	2.54858e-137	88.1	7	F:GO:0005524; P:GO:0006457; P:GO:0009408; C:GO:0016021; F:GO:0031072; F:GO:0046872; F:GO:0051082	F:ATP binding; P:protein folding; P:response to heat; C:integral component of membrane; F:heat shock protein binding; F:metal ion binding; F:unfolded protein binding			IPR002939 (PFAM); G3DSA:2.10.230.10 (GENE3D); IPR001305 (PFAM); G3DSA:2.60.260.20 (GENE3D); G3DSA:2.60.260.20 (GENE3D); PTHR43096 (PANTHER); PTHR43096:SF26 (PANTHER); IPR001305 (PROSITE_PROFILES); IPR001305 (CDD); IPR036410 (SUPERFAMILY); IPR008971 (SUPERFAMILY)	P:GO:0006457; F:GO:0031072; F:GO:0051082	P:protein folding; F:heat shock protein binding; F:unfolded protein binding
HY10058_c0_g1_i4	chaperone protein DnaJ isoform X2	1524	20	2.53728e-159	79.05	7	F:GO:0005524; P:GO:0006457; P:GO:0009408; C:GO:0016021; F:GO:0031072; F:GO:0046872; F:GO:0051082	F:ATP binding; P:protein folding; P:response to heat; C:integral component of membrane; F:heat shock protein binding; F:metal ion binding; F:unfolded protein binding			IPR002939 (PFAM); G3DSA:2.60.260.20 (GENE3D); PTHR43096 (PANTHER); PTHR43096:SF26 (PANTHER); IPR008971 (SUPERFAMILY)	P:GO:0006457; F:GO:0051082	P:protein folding; F:unfolded protein binding
HY10058_c0_g1_i5	chaperone protein DnaJ isoform X2	2357	20	4.07748e-141	88.9	7	F:GO:0005524; P:GO:0006457; P:GO:0009408; C:GO:0016021; F:GO:0031072; F:GO:0046872; F:GO:0051082	F:ATP binding; P:protein folding; P:response to heat; C:integral component of membrane; F:heat shock protein binding; F:metal ion binding; F:unfolded protein binding			IPR002939 (PFAM); G3DSA:2.10.230.10 (GENE3D); IPR001305 (PFAM); G3DSA:2.60.260.20 (GENE3D); G3DSA:2.60.260.20 (GENE3D); PTHR43096 (PANTHER); PTHR43096:SF26 (PANTHER); IPR001305 (PROSITE_PROFILES); IPR001305 (CDD); IPR036410 (SUPERFAMILY); IPR008971 (SUPERFAMILY)	P:GO:0006457; F:GO:0031072; F:GO:0051082	P:protein folding; F:heat shock protein binding; F:unfolded protein binding
HY10058_c0_g1_i6	chaperone protein DnaJ isoform X2	3465	20	3.72191e-137	88.1	7	F:GO:0005524; P:GO:0006457; P:GO:0009408; C:GO:0016021; F:GO:0031072; F:GO:0046872; F:GO:0051082	F:ATP binding; P:protein folding; P:response to heat; C:integral component of membrane; F:heat shock protein binding; F:metal ion binding; F:unfolded protein binding			IPR002939 (PFAM); G3DSA:2.10.230.10 (GENE3D); IPR001305 (PFAM); G3DSA:2.60.260.20 (GENE3D); G3DSA:2.60.260.20 (GENE3D); PTHR43096 (PANTHER); PTHR43096:SF26 (PANTHER); IPR001305 (PROSITE_PROFILES); IPR001305 (CDD); IPR036410 (SUPERFAMILY); IPR008971 (SUPERFAMILY)	P:GO:0006457; F:GO:0031072; F:GO:0051082	P:protein folding; F:heat shock protein binding; F:unfolded protein binding
HY10058_c0_g1_i7	chaperone protein DnaJ isoform X2	4518	20	1.58738e-134	88.1	7	F:GO:0005524; P:GO:0006457; P:GO:0009408; C:GO:0016021; F:GO:0031072; F:GO:0046872; F:GO:0051082	F:ATP binding; P:protein folding; P:response to heat; C:integral component of membrane; F:heat shock protein binding; F:metal ion binding; F:unfolded protein binding			IPR002939 (PFAM); G3DSA:2.10.230.10 (GENE3D); IPR001305 (PFAM); G3DSA:2.60.260.20 (GENE3D); G3DSA:2.60.260.20 (GENE3D); PTHR43096 (PANTHER); PTHR43096:SF26 (PANTHER); IPR001305 (PROSITE_PROFILES); IPR001305 (CDD); IPR036410 (SUPERFAMILY); IPR008971 (SUPERFAMILY)	P:GO:0006457; F:GO:0031072; F:GO:0051082	P:protein folding; F:heat shock protein binding; F:unfolded protein binding
HY10058_c0_g1_i8	chaperone protein DnaJ isoform X2	1312	7	5.85971e-05	100	8	F:GO:0005524; P:GO:0006457; P:GO:0009408; C:GO:0016020; C:GO:0016021; F:GO:0031072; F:GO:0046872; F:GO:0051082	F:ATP binding; P:protein folding; P:response to heat; C:membrane; C:integral component of membrane; F:heat shock protein binding; F:metal ion binding; F:unfolded protein binding			no IPS match	no IPS match	no IPS match
HY10058_c0_g1_i9	chaperone protein DnaJ isoform X1	4083	20	5.76303e-149	89.25	7	F:GO:0005524; P:GO:0006457; P:GO:0009408; C:GO:0016021; F:GO:0031072; F:GO:0046872; F:GO:0051082	F:ATP binding; P:protein folding; P:response to heat; C:integral component of membrane; F:heat shock protein binding; F:metal ion binding; F:unfolded protein binding			G3DSA:2.60.260.20 (GENE3D); IPR002939 (PFAM); PTHR43096 (PANTHER); PTHR43096:SF26 (PANTHER); cd10747 (CDD); IPR008971 (SUPERFAMILY)	P:GO:0006457; F:GO:0051082	P:protein folding; F:unfolded protein binding
HY10058_c0_g2_i1	---NA---	422									no IPS match	no IPS match	no IPS match
HY10058_c0_g2_i2	---NA---	611									no IPS match	no IPS match	no IPS match
HY10058_c0_g3_i1	actin-related protein 4	2362	20	0	92.6						G3DSA:3.30.420.40 (GENE3D); IPR004000 (PFAM); G3DSA:3.30.420.40 (GENE3D); mobidb-lite (MOBIDB_LITE); PTHR11937:SF274 (PANTHER); IPR004000 (PANTHER); cd00012 (CDD); SSF53067 (SUPERFAMILY); SSF53067 (SUPERFAMILY)	no GO terms	no GO terms
HY10058_c0_g3_i2	actin-related protein 4-like	1581	20	2.92112e-100	95.65						G3DSA:3.30.420.40 (GENE3D); IPR004000 (PFAM); IPR004000 (PANTHER); PTHR11937:SF274 (PANTHER); SSF53067 (SUPERFAMILY)	no GO terms	no GO terms
HY10058_c0_g3_i3	actin-related protein 4	2289	20	0	93.65						G3DSA:3.30.420.40 (GENE3D); IPR004000 (PFAM); G3DSA:3.90.640.10 (GENE3D); G3DSA:3.30.420.40 (GENE3D); G3DSA:3.30.420.40 (GENE3D); mobidb-lite (MOBIDB_LITE); IPR004000 (PANTHER); PTHR11937:SF274 (PANTHER); cd00012 (CDD); SSF53067 (SUPERFAMILY); SSF53067 (SUPERFAMILY)	no GO terms	no GO terms
HY10058_c0_g3_i4	actin-related protein 4	1512	20	2.90021e-125	92.95						G3DSA:3.30.420.40 (GENE3D); IPR004000 (PFAM); G3DSA:3.30.420.40 (GENE3D); mobidb-lite (MOBIDB_LITE); PTHR11937:SF274 (PANTHER); IPR004000 (PANTHER); cd00012 (CDD); SSF53067 (SUPERFAMILY); SSF53067 (SUPERFAMILY)	no GO terms	no GO terms
HY10058_c0_g3_i5	actin-related protein 4-like	747	20	2.2041e-07	97.65						no IPS match	no IPS match	no IPS match
HY10058_c1_g1_i1	---NA---	1247									no IPS match	no IPS match	no IPS match
HY10058_c1_g1_i2	---NA---	1247									no IPS match	no IPS match	no IPS match
HY10058_c1_g2_i1	---NA---	264									no IPS match	no IPS match	no IPS match
HY10059_c0_g1_i1	CHD3-type chromatin-remodeling factor PICKLE	9629	20	0	97.3	5	F:GO:0004386; F:GO:0005506; F:GO:0005524; C:GO:0005634; F:GO:0016740	F:helicase activity; F:iron ion binding; F:ATP binding; C:nucleus; F:transferase activity	EC:3.6.1.15	Nucleoside-triphosphate phosphatase	G3DSA:3.40.50.300 (GENE3D); IPR019787 (PFAM); IPR001650 (PFAM); G3DSA:2.40.50.40 (GENE3D); IPR000330 (PFAM); IPR013083 (G3DSA:3.30.40.GENE3D); G3DSA:3.40.50.10810 (GENE3D); IPR023780 (PFAM); G3DSA:2.40.50.40 (GENE3D); mobidb-lite (MOBIDB_LITE); PTHR10799 (PANTHER); PTHR10799:SF853 (PANTHER); IPR000953 (PROSITE_PROFILES); IPR000953 (PROSITE_PROFILES); IPR019787 (PROSITE_PROFILES); IPR001650 (PROSI…	F:GO:0005524	F:ATP binding
HY10059_c0_g1_i10	CHD3-type chromatin-remodeling factor PICKLE	6851	20	0	97.3	5	F:GO:0004386; F:GO:0005506; F:GO:0005524; C:GO:0005634; F:GO:0016740	F:helicase activity; F:iron ion binding; F:ATP binding; C:nucleus; F:transferase activity	EC:3.6.1.15	Nucleoside-triphosphate phosphatase	G3DSA:3.40.50.300 (GENE3D); IPR019787 (PFAM); IPR023780 (PFAM); G3DSA:2.40.50.40 (GENE3D); G3DSA:2.40.50.40 (GENE3D); G3DSA:3.40.50.10810 (GENE3D); IPR013083 (G3DSA:3.30.40.GENE3D); IPR001650 (PFAM); IPR000330 (PFAM); mobidb-lite (MOBIDB_LITE); PTHR10799 (PANTHER); PTHR10799:SF853 (PANTHER); IPR001650 (PROSITE_PROFILES); IPR000953 (PROSITE_PROFILES); IPR014001 (PROSITE_PROFILES); IPR000953 (PROSI…	F:GO:0005524	F:ATP binding
HY10059_c0_g1_i11	CHD3-type chromatin-remodeling factor PICKLE	1939	20	0	75.45	3	F:GO:0005524; C:GO:0005634; F:GO:0046872	F:ATP binding; C:nucleus; F:metal ion binding			G3DSA:1.10.10.60 (GENE3D); IPR009462 (PFAM); G3DSA:1.10.10.60 (GENE3D); mobidb-lite (MOBIDB_LITE); mobidb-lite (MOBIDB_LITE); mobidb-lite (MOBIDB_LITE); PTHR10799:SF853 (PANTHER); PTHR10799 (PANTHER)	no GO terms	no GO terms
HY10059_c0_g1_i12	CHD3-type chromatin-remodeling factor PICKLE	1586	20	0	96.65	5	F:GO:0004386; F:GO:0005506; F:GO:0005524; C:GO:0005634; F:GO:0016740	F:helicase activity; F:iron ion binding; F:ATP binding; C:nucleus; F:transferase activity	EC:3.6.1.15	Nucleoside-triphosphate phosphatase	G3DSA:2.40.50.40 (GENE3D); IPR013083 (G3DSA:3.30.40.GENE3D); IPR019787 (PFAM); IPR000330 (PFAM); IPR023780 (PFAM); G3DSA:2.40.50.40 (GENE3D); G3DSA:3.40.50.10810 (GENE3D); mobidb-lite (MOBIDB_LITE); PTHR10799:SF853 (PANTHER); PTHR10799 (PANTHER); IPR000953 (PROSITE_PROFILES); IPR000953 (PROSITE_PROFILES); IPR014001 (PROSITE_PROFILES); IPR000953 (CDD); cd00046 (CDD); IPR000953 (CDD); IPR027417 (SU…	F:GO:0005524	F:ATP binding
HY10059_c0_g1_i13	CHD3-type chromatin-remodeling factor PICKLE	6208	20	0	97.25	5	F:GO:0004386; F:GO:0005506; F:GO:0005524; C:GO:0005634; F:GO:0016740	F:helicase activity; F:iron ion binding; F:ATP binding; C:nucleus; F:transferase activity	EC:3.6.1.15	Nucleoside-triphosphate phosphatase	G3DSA:2.40.50.40 (GENE3D); IPR023780 (PFAM); G3DSA:2.40.50.40 (GENE3D); IPR000330 (PFAM); IPR013083 (G3DSA:3.30.40.GENE3D); G3DSA:3.40.50.10810 (GENE3D); IPR019787 (PFAM); IPR001650 (PFAM); G3DSA:3.40.50.300 (GENE3D); mobidb-lite (MOBIDB_LITE); PTHR10799:SF853 (PANTHER); PTHR10799 (PANTHER); IPR001650 (PROSITE_PROFILES); IPR000953 (PROSITE_PROFILES); IPR014001 (PROSITE_PROFILES); IPR000953 (PROSI…	F:GO:0005524	F:ATP binding
HY10059_c0_g1_i14	putative miraculin-like protein 2	293	3	0.00042907	78	2	F:GO:0004866; P:GO:0010951	F:endopeptidase inhibitor activity; P:negative regulation of endopeptidase activity			no IPS match	no IPS match	no IPS match
HY10059_c0_g1_i15	CHD3-type chromatin-remodeling factor PICKLE	6467	20	0	97.3	5	F:GO:0004386; F:GO:0005506; F:GO:0005524; C:GO:0005634; F:GO:0016740	F:helicase activity; F:iron ion binding; F:ATP binding; C:nucleus; F:transferase activity	EC:3.6.1.15	Nucleoside-triphosphate phosphatase	G3DSA:2.40.50.40 (GENE3D); IPR019787 (PFAM); G3DSA:2.40.50.40 (GENE3D); G3DSA:3.40.50.300 (GENE3D); IPR000330 (PFAM); IPR013083 (G3DSA:3.30.40.GENE3D); IPR023780 (PFAM); IPR001650 (PFAM); G3DSA:3.40.50.10810 (GENE3D); mobidb-lite (MOBIDB_LITE); PTHR10799 (PANTHER); PTHR10799:SF853 (PANTHER); IPR019787 (PROSITE_PROFILES); IPR000953 (PROSITE_PROFILES); IPR000953 (PROSITE_PROFILES); IPR001650 (PROSI…	F:GO:0005524	F:ATP binding
HY10059_c0_g1_i16	CHD3-type chromatin-remodeling factor PICKLE	3398	20	0	95.1	5	F:GO:0004386; F:GO:0005506; F:GO:0005524; C:GO:0005634; F:GO:0016740	F:helicase activity; F:iron ion binding; F:ATP binding; C:nucleus; F:transferase activity	EC:3.6.1.15	Nucleoside-triphosphate phosphatase	IPR009463 (PFAM); G3DSA:1.10.10.60 (GENE3D); G3DSA:3.40.50.300 (GENE3D); IPR001650 (PFAM); G3DSA:1.10.10.60 (GENE3D); IPR000330 (PFAM); IPR009462 (PFAM); mobidb-lite (MOBIDB_LITE); mobidb-lite (MOBIDB_LITE); PTHR10799:SF853 (PANTHER); PTHR10799 (PANTHER); PTHR10799 (PANTHER); PTHR10799:SF853 (PANTHER); IPR001650 (PROSITE_PROFILES); IPR001650 (CDD); IPR027417 (SUPERFAMILY)	F:GO:0005524	F:ATP binding
HY10059_c0_g1_i17	CHD3-type chromatin-remodeling factor PICKLE	2652	20	0	72.9	3	F:GO:0005524; C:GO:0005634; F:GO:0046872	F:ATP binding; C:nucleus; F:metal ion binding			mobidb-lite (MOBIDB_LITE); mobidb-lite (MOBIDB_LITE); mobidb-lite (MOBIDB_LITE)	no GO terms	no GO terms
HY10059_c0_g1_i18	CHD3-type chromatin-remodeling factor PICKLE	8180	20	0	97.2	5	F:GO:0004386; F:GO:0005506; F:GO:0005524; C:GO:0005634; F:GO:0016740	F:helicase activity; F:iron ion binding; F:ATP binding; C:nucleus; F:transferase activity	EC:3.6.1.15	Nucleoside-triphosphate phosphatase	IPR013083 (G3DSA:3.30.40.GENE3D); IPR001650 (PFAM); IPR000330 (PFAM); IPR019787 (PFAM); IPR023780 (PFAM); G3DSA:2.40.50.40 (GENE3D); G3DSA:3.40.50.10810 (GENE3D); G3DSA:3.40.50.300 (GENE3D); G3DSA:2.40.50.40 (GENE3D); mobidb-lite (MOBIDB_LITE); PTHR10799:SF853 (PANTHER); PTHR10799 (PANTHER); IPR000953 (PROSITE_PROFILES); IPR000953 (PROSITE_PROFILES); IPR019787 (PROSITE_PROFILES); IPR014001 (PROSI…	F:GO:0005524	F:ATP binding
HY10059_c0_g1_i19	CHD3-type chromatin-remodeling factor PICKLE	6017	20	0	97.25	5	F:GO:0004386; F:GO:0005506; F:GO:0005524; C:GO:0005634; F:GO:0016740	F:helicase activity; F:iron ion binding; F:ATP binding; C:nucleus; F:transferase activity	EC:3.6.1.15	Nucleoside-triphosphate phosphatase	G3DSA:2.40.50.40 (GENE3D); IPR023780 (PFAM); G3DSA:2.40.50.40 (GENE3D); IPR000330 (PFAM); IPR013083 (G3DSA:3.30.40.GENE3D); G3DSA:3.40.50.10810 (GENE3D); IPR019787 (PFAM); IPR001650 (PFAM); G3DSA:3.40.50.300 (GENE3D); mobidb-lite (MOBIDB_LITE); PTHR10799:SF853 (PANTHER); PTHR10799 (PANTHER); IPR001650 (PROSITE_PROFILES); IPR000953 (PROSITE_PROFILES); IPR014001 (PROSITE_PROFILES); IPR000953 (PROSI…	F:GO:0005524	F:ATP binding
HY10059_c0_g1_i2	CHD3-type chromatin-remodeling factor PICKLE	5593	20	0	97.25	5	F:GO:0004386; F:GO:0005506; F:GO:0005524; C:GO:0005634; F:GO:0016740	F:helicase activity; F:iron ion binding; F:ATP binding; C:nucleus; F:transferase activity	EC:3.6.1.15	Nucleoside-triphosphate phosphatase	G3DSA:2.40.50.40 (GENE3D); IPR023780 (PFAM); G3DSA:2.40.50.40 (GENE3D); IPR000330 (PFAM); IPR013083 (G3DSA:3.30.40.GENE3D); G3DSA:3.40.50.10810 (GENE3D); IPR019787 (PFAM); IPR001650 (PFAM); G3DSA:3.40.50.300 (GENE3D); mobidb-lite (MOBIDB_LITE); PTHR10799:SF853 (PANTHER); PTHR10799 (PANTHER); IPR001650 (PROSITE_PROFILES); IPR000953 (PROSITE_PROFILES); IPR014001 (PROSITE_PROFILES); IPR000953 (PROSI…	F:GO:0005524	F:ATP binding
[truncated: 202,680+ more rows]
