# Supplementary material for: Association of T2/S-RNase With Self-Incompatibility of Japanese Citrus Accessions Examined by Transcriptomic, Phylogenetic, and Genetic Approaches
Source: Front Plant Sci. 2021 Feb 12;12:638321. doi: 10.3389/fpls.2021.638321 (PMC7909312; doi:10.3389/fpls.2021.638321)
Supplement: Supplementary file 4 [file Table_3.XLSX]

## Sheet: Table S3
Table S3. Continued.
SeqName	Description	Length	#Hits	e-Value	sim mean	#GO	GO IDs	GO Names	Enzyme Codes	Enzyme Names	InterPro IDs	InterPro GO IDs	InterPro GO Names
HSK0_c0_g1_i1	non-structural maintenance of chromosomes element 1 homolog	311	20	2.32364e-66	89.61	6	P:GO:0000724; F:GO:0004842; C:GO:0005634; P:GO:0006301; P:GO:0016567; C:GO:0030915	P:double-strand break repair via homologous recombination; F:ubiquitin-protein transferase activity; C:nucleus; P:postreplication repair; P:protein ubiquitination; C:Smc5-Smc6 complex			IPR011513 (PFAM)	P:GO:0006281; C:GO:0030915	P:DNA repair; C:Smc5-Smc6 complex
HSK10_c0_g1_i1	---NA---	269									no IPS match	no IPS match	no IPS match
HSK100_c0_g1_i1	---NA---	269									no IPS match	no IPS match	no IPS match
HSK1000_c0_g1_i1	---NA---	506									no IPS match	no IPS match	no IPS match
HSK10000_c0_g1_i1	S-adenosyl-L-methionine-dependent methyltransferases superfamily protein, putative	1238	20	0	85.96	3	F:GO:0008168; C:GO:0016021; P:GO:0032259	F:methyltransferase activity; C:integral component of membrane; P:methylation			G3DSA:3.40.50.150 (GENE3D); PTHR12176 (PANTHER); PTHR12176:SF23 (PANTHER); IPR029063 (SUPERFAMILY)	no GO terms	no GO terms
HSK10001_c0_g1_i1	4-coumarate--CoA ligase-like 9	674	20	1.16933e-154	84.92	3	P:GO:0008152; C:GO:0016021; F:GO:0016874	P:metabolic process; C:integral component of membrane; F:ligase activity			IPR000873 (PFAM); G3DSA:3.40.50.12780 (GENE3D); PTHR24096:SF160 (PANTHER); PTHR24096 (PANTHER); SSF56801 (SUPERFAMILY)	F:GO:0003824; P:GO:0008152	F:catalytic activity; P:metabolic process
HSK10002_c0_g1_i1	hypothetical protein CISIN_1g009764mg	468	20	4.74036e-82	74.05						PTHR35505 (PANTHER)	no GO terms	no GO terms
HSK10003_c0_g1_i1	---NA---	231									mobidb-lite (MOBIDB_LITE)	no GO terms	no GO terms
HSK10003_c0_g1_i2	uncharacterized mitochondrial protein AtMg00810-like	902	20	8.36389e-78	75.67	2	F:GO:0005488; C:GO:0016020	F:binding; C:membrane			PTHR11439:SF204 (PANTHER); PTHR11439 (PANTHER); cd09272 (CDD)	no GO terms	no GO terms
HSK10003_c0_g2_i1	probable ATP-dependent RNA helicase DDX31 isoform X2	361	2	3.66922e-09	64.98						no IPS match	no IPS match	no IPS match
HSK10004_c0_g1_i1	DNA (cytosine-5)-methyltransferase 1	398	20	3.53698e-89	94.55	7	C:GO:0000785; F:GO:0003677; F:GO:0003682; F:GO:0003886; C:GO:0005634; P:GO:0006555; P:GO:0090116	C:chromatin; F:DNA binding; F:chromatin binding; F:DNA (cytosine-5-)-methyltransferase activity; C:nucleus; P:methionine metabolic process; P:C-5 methylation of cytosine	EC:2.1.1.37	DNA (cytosine-5-)-methyltransferase	IPR001525 (PRINTS); G3DSA:3.40.50.150 (GENE3D); IPR001525 (PFAM); PTHR10629:SF36 (PANTHER); PTHR10629 (PANTHER); IPR001525 (PROSITE_PROFILES); IPR029063 (SUPERFAMILY)	F:GO:0008168	F:methyltransferase activity
HSK10004_c0_g2_i1	DNA (cytosine-5)-methyltransferase 1-like	384	20	8.73355e-53	96.32	7	C:GO:0000785; F:GO:0003677; F:GO:0003682; F:GO:0003886; C:GO:0005634; P:GO:0006555; P:GO:0090116	C:chromatin; F:DNA binding; F:chromatin binding; F:DNA (cytosine-5-)-methyltransferase activity; C:nucleus; P:methionine metabolic process; P:C-5 methylation of cytosine	EC:2.1.1.37	DNA (cytosine-5-)-methyltransferase	G3DSA:3.90.120.10 (GENE3D); IPR001525 (PFAM); PTHR10629:SF36 (PANTHER); PTHR10629 (PANTHER); IPR029063 (SUPERFAMILY)	F:GO:0008168	F:methyltransferase activity
HSK10005_c0_g1_i1	kinesin-like protein KIN-7C, mitochondrial	575	20	1.51468e-72	82.6	8	F:GO:0003777; F:GO:0005524; C:GO:0005871; C:GO:0005874; P:GO:0007018; F:GO:0008017; F:GO:0016887; C:GO:0045298	F:microtubule motor activity; F:ATP binding; C:kinesin complex; C:microtubule; P:microtubule-based movement; F:microtubule binding; F:ATPase activity; C:tubulin complex	EC:3.6.1.3; EC:3.6.1.15	Adenosinetriphosphatase; Nucleoside-triphosphate phosphatase	no IPS match	no IPS match	no IPS match
HSK10005_c0_g2_i1	kinesin-like protein KIN-7C, mitochondrial	383	20	1.45591e-78	84.49	9	F:GO:0003777; F:GO:0005524; C:GO:0005871; C:GO:0005874; C:GO:0005886; P:GO:0007018; F:GO:0008017; F:GO:0016887; C:GO:0045298	F:microtubule motor activity; F:ATP binding; C:kinesin complex; C:microtubule; C:plasma membrane; P:microtubule-based movement; F:microtubule binding; F:ATPase activity; C:tubulin complex	EC:3.6.1.3; EC:3.6.1.15	Adenosinetriphosphatase; Nucleoside-triphosphate phosphatase	IPR027640 (PANTHER); PTHR24115:SF497 (PANTHER)	F:GO:0003777; P:GO:0007018	F:microtubule motor activity; P:microtubule-based movement
HSK10006_c0_g1_i1	---NA---	316									no IPS match	no IPS match	no IPS match
HSK10007_c0_g1_i1	---NA---	351									no IPS match	no IPS match	no IPS match
HSK10008_c0_g1_i1	pectinesterase 2	468	20	2.77045e-76	95.58	10	F:GO:0004857; C:GO:0005576; C:GO:0005618; P:GO:0005982; P:GO:0005985; F:GO:0030599; P:GO:0042545; P:GO:0043086; F:GO:0045330; P:GO:0045490	F:enzyme inhibitor activity; C:extracellular region; C:cell wall; P:starch metabolic process; P:sucrose metabolic process; F:pectinesterase activity; P:cell wall modification; P:negative regulation of catalytic activity; F:aspartyl esterase activity; P:pectin catabolic process	EC:3.1.1.11; EC:3.1.1.1	Pectinesterase; Carboxylesterase	IPR000070 (PFAM); IPR012334 (G3DSA:2.160.20.GENE3D); mobidb-lite (MOBIDB_LITE); PTHR31707:SF11 (PANTHER); PTHR31707 (PANTHER); IPR011050 (SUPERFAMILY)	C:GO:0005618; F:GO:0030599; P:GO:0042545	C:cell wall; F:pectinesterase activity; P:cell wall modification
HSK10008_c0_g1_i2	pectinesterase 2	570	20	5.13762e-122	93.46	10	C:GO:0005576; C:GO:0005618; P:GO:0005982; P:GO:0005985; F:GO:0030599; P:GO:0042545; P:GO:0043086; F:GO:0045330; P:GO:0045490; F:GO:0046910	C:extracellular region; C:cell wall; P:starch metabolic process; P:sucrose metabolic process; F:pectinesterase activity; P:cell wall modification; P:negative regulation of catalytic activity; F:aspartyl esterase activity; P:pectin catabolic process; F:pectinesterase inhibitor activity	EC:3.1.1.11; EC:3.1.1.1	Pectinesterase; Carboxylesterase	IPR000070 (PFAM); IPR012334 (G3DSA:2.160.20.GENE3D); mobidb-lite (MOBIDB_LITE); PTHR31707 (PANTHER); PTHR31707:SF11 (PANTHER); IPR011050 (SUPERFAMILY)	C:GO:0005618; F:GO:0030599; P:GO:0042545	C:cell wall; F:pectinesterase activity; P:cell wall modification
HSK10008_c0_g2_i1	pectinesterase 2	674	20	7.39148e-151	81.99	10	C:GO:0005576; C:GO:0005618; P:GO:0005982; P:GO:0005985; F:GO:0030599; P:GO:0042545; P:GO:0043086; F:GO:0045330; P:GO:0045490; F:GO:0046910	C:extracellular region; C:cell wall; P:starch metabolic process; P:sucrose metabolic process; F:pectinesterase activity; P:cell wall modification; P:negative regulation of catalytic activity; F:aspartyl esterase activity; P:pectin catabolic process; F:pectinesterase inhibitor activity	EC:3.1.1.11; EC:3.1.1.1	Pectinesterase; Carboxylesterase	IPR006501 (PFAM); IPR035513 (G3DSA:1.20.140.GENE3D); IPR006501 (TIGRFAM); PTHR31707:SF11 (PANTHER); PTHR31707 (PANTHER); cd15798 (CDD); IPR035513 (SUPERFAMILY)	F:GO:0004857	F:enzyme inhibitor activity
HSK10009_c0_g1_i1	mitochondrial import receptor subunit TOM9-2-like	537	20	6.7738e-70	84.51	3	C:GO:0005741; P:GO:0006886; C:GO:0016021	C:mitochondrial outer membrane; P:intracellular protein transport; C:integral component of membrane			IPR017411 (PIRSF); IPR005683 (PFAM); PTHR12504 (PANTHER); IPR005683 (PTHR12504:PANTHER)	C:GO:0005741; P:GO:0006886	C:mitochondrial outer membrane; P:intracellular protein transport
HSK10010_c0_g1_i1	serine carboxypeptidase-like 45	1576	20	0	92.79	2	F:GO:0004185; P:GO:0051603	F:serine-type carboxypeptidase activity; P:proteolysis involved in cellular protein catabolic process	EC:3.4.21; EC:3.4.16	Acting on peptide bonds (peptidases); Acting on peptide bonds (peptidases)	IPR001563 (PRINTS); IPR029058 (G3DSA:3.40.50.GENE3D); IPR001563 (PFAM); PTHR11802:SF22 (PANTHER); IPR001563 (PANTHER); IPR029058 (SUPERFAMILY)	F:GO:0004185; P:GO:0006508	F:serine-type carboxypeptidase activity; P:proteolysis
HSK10011_c0_g1_i1	DNA replication complex GINS protein PSF2	715	20	2.11676e-154	86.11	6	P:GO:0000727; C:GO:0000811; C:GO:0031298; P:GO:0032508; F:GO:0043138; P:GO:1902975	P:double-strand break repair via break-induced replication; C:GINS complex; C:replication fork protection complex; P:DNA duplex unwinding; F:3'-5' DNA helicase activity; P:mitotic DNA replication initiation	EC:3.6.1.15	Nucleoside-triphosphate phosphatase	IPR007257 (PIRSF); G3DSA:1.20.58.1020 (GENE3D); G3DSA:3.40.5.50 (GENE3D); IPR021151 (PFAM); mobidb-lite (MOBIDB_LITE); IPR007257 (PANTHER); cd11712 (CDD); IPR036224 (SUPERFAMILY); SSF160059 (SUPERFAMILY)	C:GO:0005634; P:GO:0006260	C:nucleus; P:DNA replication
HSK10012_c0_g1_i1	---NA---	597									no IPS match	no IPS match	no IPS match
HSK10014_c0_g1_i1	60S ribosomal protein L18a	814	20	3.375e-129	99.01	5	F:GO:0003723; F:GO:0003735; P:GO:0006412; C:GO:0022625; P:GO:0042254	F:RNA binding; F:structural constituent of ribosome; P:translation; C:cytosolic large ribosomal subunit; P:ribosome biogenesis			IPR021138 (PIRSF); G3DSA:3.10.20.10 (GENE3D); G3DSA:3.10.20.10 (GENE3D); IPR023573 (PFAM); PTHR10052:SF19 (PANTHER); IPR028877 (PANTHER); IPR028877 (HAMAP); SSF160374 (SUPERFAMILY)	F:GO:0003735; C:GO:0005840; P:GO:0006412	F:structural constituent of ribosome; C:ribosome; P:translation
HSK10015_c0_g1_i1	AP2-like ethylene-responsive transcription factor SNZ, putative	723	20	2.37341e-125	75.1						mobidb-lite (MOBIDB_LITE); PTHR37697 (PANTHER)	no GO terms	no GO terms
HSK10016_c0_g1_i1	putative disease resistance RPP13-like protein 1 isoform X2	214	20	1.59499e-30	96.79	1	F:GO:0043531	F:ADP binding			IPR032675 (G3DSA:3.80.10.GENE3D); SSF52047 (SUPERFAMILY)	no GO terms	no GO terms
HSK10018_c0_g1_i1	hypothetical protein CISIN_1g0060001mg, partial	278	20	3.73866e-57	76.28	1	C:GO:0016021	C:integral component of membrane			no IPS match	no IPS match	no IPS match
HSK10018_c0_g2_i1	Golgin candidate 6 isoform 1	315	20	4.15672e-45	73.96	1	C:GO:0016021	C:integral component of membrane			no IPS match	no IPS match	no IPS match
HSK10018_c0_g3_i1	Golgin candidate 6 isoform 2	727	20	1.48965e-162	79.17						IPR024875 (PANTHER)	no GO terms	no GO terms
HSK10019_c0_g1_i1	---NA---	289									no IPS match	no IPS match	no IPS match
HSK1002_c0_g1_i1	---NA---	260									no IPS match	no IPS match	no IPS match
HSK10020_c0_g1_i1	diphthamide biosynthesis protein 3-like	751	20	7.8115e-71	94.63	1	F:GO:0046872	F:metal ion binding			IPR007872 (PFAM); IPR036671 (G3DSA:3.10.660.GENE3D); mobidb-lite (MOBIDB_LITE); PTHR21454:SF2 (PANTHER); PTHR21454 (PANTHER); PTHR21454:SF2 (PANTHER); IPR007872 (PROSITE_PROFILES); IPR036671 (SUPERFAMILY)	no GO terms	no GO terms
HSK10021_c0_g1_i1	NADP-dependent glyceraldehyde-3-phosphate dehydrogenase	768	20	0	98.14	5	P:GO:0006096; F:GO:0008886; P:GO:0015976; F:GO:0047100; P:GO:0055114	P:glycolytic process; F:glyceraldehyde-3-phosphate dehydrogenase (NADP+) (non-phosphorylating) activity; P:carbon utilization; F:glyceraldehyde-3-phosphate dehydrogenase (NADP+) (phosphorylating) activity; P:oxidation-reduction process	EC:1.2.1.59; EC:1.2.1.13; EC:1.2.1.9	Glyceraldehyde-3-phosphate dehydrogenase (NAD(P)(+)) (phosphorylating); Glyceraldehyde-3-phosphate dehydrogenase (NADP(+)) (phosphorylating); Glyceraldehyde-3-phosphate dehydrogenase (NADP(+))	IPR016163 (G3DSA:3.40.309.GENE3D); IPR016162 (G3DSA:3.40.605.GENE3D); IPR015590 (PFAM); PTHR42991 (PANTHER); PTHR42991:SF3 (PANTHER); IPR016161 (SUPERFAMILY)	P:GO:0008152; F:GO:0016491; F:GO:0016620; P:GO:0055114	P:metabolic process; F:oxidoreductase activity; F:oxidoreductase activity, acting on the aldehyde or oxo group of donors, NAD or NADP as acceptor; P:oxidation-reduction process
HSK10022_c0_g1_i1	---NA---	290									no IPS match	no IPS match	no IPS match
HSK10023_c0_g1_i1	F3H9.20 protein	1373	20	1.83324e-177	87.42	2	C:GO:0009507; C:GO:0016021	C:chloroplast; C:integral component of membrane			IPR019275 (PFAM); PTHR36716:SF2 (PANTHER); PTHR36716 (PANTHER)	no GO terms	no GO terms
HSK10023_c0_g1_i2	DUF2301 domain-containing protein	1127	20	3.89708e-42	75.19	1	C:GO:0016021	C:integral component of membrane			no IPS match	no IPS match	no IPS match
HSK10023_c0_g1_i3	F3H9.20 protein	651	20	3.45592e-42	72.79	1	C:GO:0016021	C:integral component of membrane			no IPS match	no IPS match	no IPS match
HSK10024_c0_g1_i1	UNC93-like protein 1	683	20	3.09775e-107	87.8	3	F:GO:0008171; C:GO:0016021; P:GO:0032259	F:O-methyltransferase activity; C:integral component of membrane; P:methylation			mobidb-lite (MOBIDB_LITE); PTHR23294:SF27 (PANTHER); PTHR23294 (PANTHER)	no GO terms	no GO terms
HSK10025_c0_g1_i1	disease resistance protein RFL1-like	335	20	8.06627e-38	82.54	1	C:GO:0016020	C:membrane			no IPS match	no IPS match	no IPS match
HSK10025_c0_g1_i2	hypothetical protein CICLE_v10012795mg	305	1	0.000131539	100						no IPS match	no IPS match	no IPS match
HSK10026_c0_g1_i1	ORF58f (chloroplast)	256	20	1.56728e-29	75.2	1	C:GO:0009507	C:chloroplast			no IPS match	no IPS match	no IPS match
HSK10026_c0_g1_i2	signal anchor, putative	454	20	7.48007e-46	68.48	1	C:GO:0009507	C:chloroplast			mobidb-lite (MOBIDB_LITE)	no GO terms	no GO terms
HSK10026_c0_g1_i3	signal anchor, putative	454	20	3.82925e-33	67.25	1	C:GO:0009507	C:chloroplast			no IPS match	no IPS match	no IPS match
HSK10026_c0_g1_i4	signal anchor, putative	543	20	7.04048e-47	65.88	1	C:GO:0009507	C:chloroplast			no IPS match	no IPS match	no IPS match
HSK10027_c0_g1_i1	putative transcription factor bHLH041	551	20	7.27028e-107	70.13	1	F:GO:0046983	F:protein dimerization activity			mobidb-lite (MOBIDB_LITE); PTHR12565 (PANTHER); PTHR12565:SF157 (PANTHER)	no GO terms	no GO terms
HSK10027_c0_g1_i2	putative transcription factor bHLH041 isoform X1	611	20	4.84972e-127	75.56	1	F:GO:0046983	F:protein dimerization activity			mobidb-lite (MOBIDB_LITE); PTHR12565 (PANTHER); PTHR12565:SF157 (PANTHER)	no GO terms	no GO terms
HSK10027_c0_g1_i3	putative transcription factor bHLH041	583	20	4.64659e-109	77.05	1	F:GO:0046983	F:protein dimerization activity			mobidb-lite (MOBIDB_LITE); PTHR12565:SF157 (PANTHER); PTHR12565 (PANTHER)	no GO terms	no GO terms
HSK10027_c0_g1_i4	putative transcription factor bHLH041	523	20	4.34501e-89	71.16	1	F:GO:0046983	F:protein dimerization activity			mobidb-lite (MOBIDB_LITE); PTHR12565 (PANTHER); PTHR12565:SF157 (PANTHER)	no GO terms	no GO terms
HSK10028_c0_g1_i1	L-gulonolactone oxidase 3	1037	20	0	90.37	4	F:GO:0003885; C:GO:0016020; F:GO:0050660; P:GO:0055114	F:D-arabinono-1,4-lactone oxidase activity; C:membrane; F:flavin adenine dinucleotide binding; P:oxidation-reduction process	EC:1.1.3.37	D-arabinono-1,4-lactone oxidase	IPR010030 (TIGRFAM); G3DSA:3.30.465.10 (GENE3D); IPR007173 (PFAM); PTHR13878 (PANTHER); PTHR13878:SF51 (PANTHER)	F:GO:0003885; C:GO:0016020; P:GO:0055114	F:D-arabinono-1,4-lactone oxidase activity; C:membrane; P:oxidation-reduction process
HSK10029_c0_g1_i1	protein CHUP1, chloroplastic	1307	20	0	79.71	2	P:GO:0009658; C:GO:0009707	P:chloroplast organization; C:chloroplast outer membrane			mobidb-lite (MOBIDB_LITE); PTHR31342 (PANTHER); PTHR31342:SF12 (PANTHER)	no GO terms	no GO terms
HSK1003_c0_g1_i1	linoleate 13S-lipoxygenase 2-1, chloroplastic	741	20	3.97273e-125	63.04	4	F:GO:0005515; F:GO:0016702; F:GO:0046872; P:GO:0055114	F:protein binding; F:oxidoreductase activity, acting on single donors with incorporation of molecular oxygen, incorporation of two atoms of oxygen; F:metal ion binding; P:oxidation-reduction process	EC:1.13.11	Acting on single donors with incorporation of molecular oxygen (oxygenases). The oxygen incorporated need not be derived from O(2)	IPR001024 (PFAM); G3DSA:2.60.60.20 (GENE3D); mobidb-lite (MOBIDB_LITE); IPR000907 (PANTHER); PTHR11771:SF66 (PANTHER); IPR001024 (PROSITE_PROFILES); IPR036392 (SUPERFAMILY)	F:GO:0005515; F:GO:0016702; F:GO:0046872; P:GO:0055114	F:protein binding; F:oxidoreductase activity, acting on single donors with incorporation of molecular oxygen, incorporation of two atoms of oxygen; F:metal ion binding; P:oxidation-reduction process
HSK10030_c0_g1_i1	cytochrome b561 and DOMON domain-containing protein At5g47530-like	518	20	5.35625e-104	73.95	2	C:GO:0016021; P:GO:0055114	C:integral component of membrane; P:oxidation-reduction process			PTHR23130:SF141 (PANTHER); PTHR23130 (PANTHER); IPR006593 (PROSITE_PROFILES); cd08760 (CDD)	no GO terms	no GO terms
HSK10031_c0_g1_i1	berberine bridge enzyme-like 8	1488	20	0	87.09	5	P:GO:0009821; F:GO:0016614; F:GO:0050468; F:GO:0050660; P:GO:0055114	P:alkaloid biosynthetic process; F:oxidoreductase activity, acting on CH-OH group of donors; F:reticuline oxidase activity; F:flavin adenine dinucleotide binding; P:oxidation-reduction process	EC:1.21.3.3; EC:1.21.3	Reticuline oxidase; Catalyzing the reaction X-H + Y-H = 'X-Y'	G3DSA:3.40.462.20 (GENE3D); IPR012951 (PFAM); G3DSA:3.30.465.50 (GENE3D); IPR006094 (PFAM); IPR016167 (G3DSA:3.30.43.GENE3D); PTHR32448 (PANTHER); PTHR32448:SF25 (PANTHER); IPR016166 (PROSITE_PROFILES); IPR036318 (SUPERFAMILY)	F:GO:0003824; F:GO:0016491; F:GO:0016614; F:GO:0050660; P:GO:0055114	F:catalytic activity; F:oxidoreductase activity; F:oxidoreductase activity, acting on CH-OH group of donors; F:flavin adenine dinucleotide binding; P:oxidation-reduction process
HSK10032_c0_g1_i1	---NA---	634									no IPS match	no IPS match	no IPS match
HSK10032_c0_g2_i1	Gag-pol polyprotein, putative	1116	20	5.22941e-14	50.14	2	F:GO:0003676; F:GO:0008270	F:nucleic acid binding; F:zinc ion binding			mobidb-lite (MOBIDB_LITE)	no GO terms	no GO terms
HSK10033_c0_g1_i1	---NA---	222									no IPS match	no IPS match	no IPS match
HSK10034_c0_g1_i1	---NA---	287									no IPS match	no IPS match	no IPS match
HSK10034_c1_g1_i1	---NA---	228									no IPS match	no IPS match	no IPS match
HSK10035_c0_g1_i1	hypothetical protein CICLE_v10013268mg	393	20	6.48576e-24	90.58	1	C:GO:0016021	C:integral component of membrane			mobidb-lite (MOBIDB_LITE); PTHR37225 (PANTHER)	no GO terms	no GO terms
HSK10036_c0_g1_i1	---NA---	297									no IPS match	no IPS match	no IPS match
HSK10036_c0_g1_i2	---NA---	318									no IPS match	no IPS match	no IPS match
HSK10037_c0_g1_i1	cysteine-rich PDZ-binding protein	685	20	7.36646e-64	95.92						IPR019367 (PFAM); IPR019367 (PANTHER)	no GO terms	no GO terms
HSK10037_c0_g1_i2	cysteine-rich PDZ-binding protein	501	20	1.47062e-30	98.65						IPR019367 (PFAM); IPR019367 (PANTHER)	no GO terms	no GO terms
HSK10037_c0_g1_i3	cysteine-rich PDZ-binding protein	352	20	3.44128e-23	92.57						IPR019367 (PFAM); IPR019367 (PANTHER)	no GO terms	no GO terms
HSK10037_c0_g2_i1	---NA---	264									no IPS match	no IPS match	no IPS match
HSK10038_c0_g1_i1	sodium/hydrogen exchanger 4	1217	20	0	89.53	9	C:GO:0005774; P:GO:0006885; P:GO:0009651; F:GO:0015385; C:GO:0016021; P:GO:0035725; P:GO:0055075; P:GO:1902600; P:GO:1902600	C:vacuolar membrane; P:regulation of pH; P:response to salt stress; F:sodium:proton antiporter activity; C:integral component of membrane; P:sodium ion transmembrane transport; P:potassium ion homeostasis; P:proton transmembrane transport; P:proton transmembrane transport			IPR006153 (PFAM); IPR018422 (PANTHER); IPR036958 (PTHR10110:PANTHER)	C:GO:0005774; P:GO:0006812; P:GO:0006814; P:GO:0009651; F:GO:0015299; C:GO:0016021; P:GO:0055075; P:GO:0055085	C:vacuolar membrane; P:cation transport; P:sodium ion transport; P:response to salt stress; F:solute:proton antiporter activity; C:integral component of membrane; P:potassium ion homeostasis; P:transmembrane transport
HSK10039_c0_g1_i1	putative pentatricopeptide repeat-containing protein At5g40405	739	20	0	91.18	2	F:GO:0005515; F:GO:0008270	F:protein binding; F:zinc ion binding			IPR011990 (G3DSA:1.25.40.GENE3D); IPR002885 (PFAM); IPR002885 (PFAM); IPR002885 (TIGRFAM); PTHR24015:SF1640 (PANTHER); PTHR24015 (PANTHER); IPR002885 (PROSITE_PROFILES); IPR002885 (PROSITE_PROFILES); IPR002885 (PROSITE_PROFILES); IPR002885 (PROSITE_PROFILES); IPR002885 (PROSITE_PROFILES); IPR002885 (PROSITE_PROFILES); IPR002885 (PROSITE_PROFILES)	F:GO:0005515	F:protein binding
HSK10039_c0_g2_i1	putative pentatricopeptide repeat-containing protein At5g40405	566	20	2.20913e-133	93.22	1	F:GO:0008270	F:zinc ion binding			IPR032867 (PFAM); PTHR44853 (PANTHER)	F:GO:0008270	F:zinc ion binding
HSK1004_c0_g1_i1	F-box/LRR-repeat protein At3g48880	242	20	7.70479e-52	69.31						PTHR44918 (PANTHER)	no GO terms	no GO terms
HSK10040_c0_g1_i1	vinorine synthase-like	437	20	7.83575e-83	85.92	2	C:GO:0016020; F:GO:0016747	C:membrane; F:transferase activity, transferring acyl groups other than amino-acyl groups			IPR023213 (G3DSA:3.30.559.GENE3D); IPR003480 (PFAM); PTHR31623 (PANTHER); PTHR31623:SF16 (PANTHER)	F:GO:0016747	F:transferase activity, transferring acyl groups other than amino-acyl groups
HSK10040_c1_g1_i1	vinorine synthase-like	211	20	4.38736e-44	86.74	1	F:GO:0016747	F:transferase activity, transferring acyl groups other than amino-acyl groups			IPR023213 (G3DSA:3.30.559.GENE3D); IPR003480 (PFAM)	F:GO:0016747	F:transferase activity, transferring acyl groups other than amino-acyl groups
HSK10041_c0_g1_i1	potassium transporter 11	265	20	2.97095e-38	95.45	5	C:GO:0005886; P:GO:0009555; F:GO:0015079; C:GO:0016021; P:GO:0071805	C:plasma membrane; P:pollen development; F:potassium ion transmembrane transporter activity; C:integral component of membrane; P:potassium ion transmembrane transport			IPR003855 (PFAM); PTHR30540:SF76 (PANTHER); IPR003855 (PANTHER)	F:GO:0015079; C:GO:0016020; P:GO:0071805	F:potassium ion transmembrane transporter activity; C:membrane; P:potassium ion transmembrane transport
HSK10041_c0_g2_i1	potassium transporter 10-like isoform X3	802	20	8.77741e-148	85.48	3	F:GO:0015079; C:GO:0016021; P:GO:0071805	F:potassium ion transmembrane transporter activity; C:integral component of membrane; P:potassium ion transmembrane transport			IPR003855 (PANTHER); PTHR30540:SF76 (PANTHER)	F:GO:0015079; C:GO:0016020; P:GO:0071805	F:potassium ion transmembrane transporter activity; C:membrane; P:potassium ion transmembrane transport
HSK10041_c0_g3_i1	potassium transporter 10	342	20	6.81998e-56	95.97	3	F:GO:0015079; C:GO:0016021; P:GO:0071805	F:potassium ion transmembrane transporter activity; C:integral component of membrane; P:potassium ion transmembrane transport			IPR003855 (PFAM); PTHR30540:SF76 (PANTHER); IPR003855 (PANTHER)	F:GO:0015079; C:GO:0016020; P:GO:0071805	F:potassium ion transmembrane transporter activity; C:membrane; P:potassium ion transmembrane transport
HSK10042_c0_g1_i1	hypothetical protein CICLE_v10017141mg	664	6	2.50911e-28	84.79						mobidb-lite (MOBIDB_LITE)	no GO terms	no GO terms
HSK10043_c0_g1_i1	coumaroyl-CoA:anthocyanidin 3-O-glucoside-6''-O-coumaroyltransferase 1-like	1691	20	0	69.01	1	F:GO:0016747	F:transferase activity, transferring acyl groups other than amino-acyl groups			IPR023213 (G3DSA:3.30.559.GENE3D); IPR003480 (PFAM); IPR023213 (G3DSA:3.30.559.GENE3D); PTHR31625:SF13 (PANTHER); PTHR31625 (PANTHER)	F:GO:0016747	F:transferase activity, transferring acyl groups other than amino-acyl groups
HSK10043_c0_g1_i2	coumaroyl-CoA:anthocyanidin 3-O-glucoside-6''-O-coumaroyltransferase 1-like	1597	20	0	68.88	1	F:GO:0016747	F:transferase activity, transferring acyl groups other than amino-acyl groups			IPR023213 (G3DSA:3.30.559.GENE3D); IPR003480 (PFAM); PTHR31625:SF13 (PANTHER); PTHR31625 (PANTHER)	F:GO:0016747	F:transferase activity, transferring acyl groups other than amino-acyl groups
HSK10044_c0_g1_i1	Nucleic acid-binding protein	1032	20	1.92679e-93	96.6						G3DSA:2.40.50.140 (GENE3D); PTHR31472:SF1 (PANTHER); PTHR31472 (PANTHER); cd04491 (CDD); IPR012340 (SUPERFAMILY)	no GO terms	no GO terms
HSK10045_c0_g1_i1	PREDICTED: uncharacterized protein LOC102616331	1452	20	0	65.63						mobidb-lite (MOBIDB_LITE); mobidb-lite (MOBIDB_LITE); mobidb-lite (MOBIDB_LITE); PTHR13445 (PANTHER)	no GO terms	no GO terms
HSK10046_c0_g1_i1	---NA---	348									no IPS match	no IPS match	no IPS match
HSK10047_c0_g1_i1	zinc finger CCCH domain-containing protein 53-like	1330	20	2.47303e-140	80.23	2	F:GO:0003723; F:GO:0046872	F:RNA binding; F:metal ion binding			IPR000504 (PFAM); IPR012677 (G3DSA:3.30.70.GENE3D); mobidb-lite (MOBIDB_LITE); mobidb-lite (MOBIDB_LITE); mobidb-lite (MOBIDB_LITE); PTHR24009 (PANTHER); PTHR24009:SF11 (PANTHER); IPR000504 (PROSITE_PROFILES); IPR034365 (CDD); IPR035979 (SUPERFAMILY)	F:GO:0003676	F:nucleic acid binding
HSK10048_c0_g1_i1	clavaminate synthase-like protein At3g21360	1176	20	0	94.38	2	F:GO:0051213; P:GO:0055114	F:dioxygenase activity; P:oxidation-reduction process			G3DSA:3.60.130.10 (GENE3D); IPR003819 (PFAM); PTHR10696:SF29 (PANTHER); PTHR10696 (PANTHER); SSF51197 (SUPERFAMILY)	F:GO:0016491; P:GO:0055114	F:oxidoreductase activity; P:oxidation-reduction process
HSK10049_c0_g1_i1	ER membrane protein complex subunit 10	2576	20	1.47178e-75	89.71						mobidb-lite (MOBIDB_LITE); IPR029615 (PTHR21397:PANTHER); PTHR21397 (PANTHER)	no GO terms	no GO terms
HSK10049_c0_g1_i2	ER membrane protein complex subunit 10	1331	20	5.33174e-170	86.81						mobidb-lite (MOBIDB_LITE); mobidb-lite (MOBIDB_LITE); PTHR21397 (PANTHER); IPR029615 (PTHR21397:PANTHER)	no GO terms	no GO terms
HSK10050_c0_g1_i1	---NA---	513									no IPS match	no IPS match	no IPS match
HSK10051_c0_g1_i1	myosin heavy chain, muscle	789	20	1.82336e-63	94.38						PTHR36080 (PANTHER); PTHR36080:SF1 (PANTHER)	no GO terms	no GO terms
HSK10051_c0_g1_i2	myosin heavy chain, muscle	1105	20	6.33579e-18	94.52						no IPS match	no IPS match	no IPS match
HSK10051_c0_g1_i3	hypothetical protein CISIN_1g031305mg	923	20	2.30084e-49	93.25						PTHR36080:SF1 (PANTHER); PTHR36080 (PANTHER)	no GO terms	no GO terms
HSK10051_c0_g2_i1	---NA---	290									no IPS match	no IPS match	no IPS match
HSK10052_c0_g1_i1	50S ribosomal protein L1	1997	20	0	79.19	5	F:GO:0003723; F:GO:0003735; P:GO:0006412; C:GO:0015934; P:GO:0042254	F:RNA binding; F:structural constituent of ribosome; P:translation; C:large ribosomal subunit; P:ribosome biogenesis			IPR016095 (G3DSA:3.40.50.GENE3D); G3DSA:3.30.190.20 (GENE3D); IPR005878 (TIGRFAM); IPR028364 (PFAM); mobidb-lite (MOBIDB_LITE); mobidb-lite (MOBIDB_LITE); PTHR23105:SF51 (PANTHER); PTHR23105 (PANTHER); IPR028364 (CDD); IPR023674 (SUPERFAMILY)	F:GO:0003723; F:GO:0003735; P:GO:0006412; C:GO:0015934	F:RNA binding; F:structural constituent of ribosome; P:translation; C:large ribosomal subunit
HSK10053_c0_g1_i1	DUF3537 domain-containing protein	789	20	0	84.62	1	C:GO:0016021	C:integral component of membrane			IPR021924 (PFAM); IPR021924 (PANTHER); PTHR31963:SF7 (PANTHER)	no GO terms	no GO terms
HSK10053_c0_g2_i1	DUF3537 domain-containing protein	531	20	1.35629e-106	80.9	1	C:GO:0016021	C:integral component of membrane			IPR021924 (PFAM); IPR021924 (PANTHER); PTHR31963:SF7 (PANTHER)	no GO terms	no GO terms
HSK10054_c0_g1_i1	hypothetical protein CICLE_v10013180mg	607	1	1.46242e-13	87.5						no IPS match	no IPS match	no IPS match
HSK10054_c0_g1_i2	hypothetical protein CICLE_v10013180mg	619	1	1.11218e-23	93.15						no IPS match	no IPS match	no IPS match
HSK10055_c0_g1_i1	---NA---	501									PS51257 (PROSITE_PROFILES)	no GO terms	no GO terms
HSK10056_c0_g1_i1	UPF0481 protein At3g47200	787	20	0	85.05	1	C:GO:0016021	C:integral component of membrane			IPR004158 (PFAM); PTHR31549:SF34 (PANTHER); PTHR31549 (PANTHER)	no GO terms	no GO terms
HSK10057_c0_g1_i1	hypothetical protein CICLE_v10032982mg	805	20	4.84715e-75	83.29	2	C:GO:0009941; C:GO:0016021	C:chloroplast envelope; C:integral component of membrane			mobidb-lite (MOBIDB_LITE); mobidb-lite (MOBIDB_LITE); PTHR36374 (PANTHER)	no GO terms	no GO terms
HSK10058_c0_g1_i1	putative pentatricopeptide repeat-containing protein At3g05240	1138	20	0	79.81	1	F:GO:0005515	F:protein binding			IPR002885 (PFAM); IPR011990 (G3DSA:1.25.40.GENE3D); IPR011990 (G3DSA:1.25.40.GENE3D); IPR002885 (PFAM); IPR002885 (TIGRFAM); PTHR24015:SF120 (PANTHER); PTHR24015:SF120 (PANTHER); PTHR24015 (PANTHER); PTHR24015 (PANTHER); IPR002885 (PROSITE_PROFILES); IPR002885 (PROSITE_PROFILES); IPR002885 (PROSITE_PROFILES); IPR002885 (PROSITE_PROFILES); IPR002885 (PROSITE_PROFILES); IPR002885 (PROSITE_PROFILES)…	F:GO:0005515	F:protein binding
HSK10059_c0_g1_i1	cyclin-B2-4-like isoform X1	341	20	4.06116e-30	81.25	1	C:GO:0005634	C:nucleus			no IPS match	no IPS match	no IPS match
HSK10059_c0_g2_i1	cyclin-B2-4-like isoform X1	231	20	6.19205e-46	81.01	1	C:GO:0005634	C:nucleus			no IPS match	no IPS match	no IPS match
HSK10060_c0_g1_i1	GTP-binding protein OBGC, chloroplastic	388	20	2.24532e-64	65.36	7	F:GO:0000287; F:GO:0003924; F:GO:0005525; C:GO:0009528; P:GO:0009657; P:GO:0042254; C:GO:0044434	F:magnesium ion binding; F:GTPase activity; F:GTP binding; C:plastid inner membrane; P:plastid organization; P:ribosome biogenesis; C:chloroplast part	EC:3.6.1.15	Nucleoside-triphosphate phosphatase	mobidb-lite (MOBIDB_LITE); mobidb-lite (MOBIDB_LITE)	no GO terms	no GO terms
HSK10061_c0_g1_i1	proline-, glutamic acid- and leucine-rich protein 1 isoform X1	722	20	1.24471e-148	81.68	1	F:GO:0005488	F:binding			IPR012583 (PFAM); PTHR34105 (PANTHER); IPR016024 (SUPERFAMILY)	F:GO:0005488	F:binding
HSK10061_c0_g1_i2	proline-, glutamic acid- and leucine-rich protein 1 isoform X1	970	20	0	82.46	1	F:GO:0005488	F:binding			IPR012583 (PFAM); PTHR34105 (PANTHER); IPR016024 (SUPERFAMILY)	F:GO:0005488	F:binding
HSK10062_c0_g1_i1	probable WRKY transcription factor 71	731	20	2.07761e-115	69.33	6	F:GO:0003700; C:GO:0005634; C:GO:0005667; P:GO:0006355; P:GO:0006355; F:GO:0043565	F:DNA binding transcription factor activity; C:nucleus; C:transcription factor complex; P:regulation of transcription, DNA-templated; P:regulation of transcription, DNA-templated; F:sequence-specific DNA binding			mobidb-lite (MOBIDB_LITE); PTHR31221 (PANTHER); PTHR31221:SF56 (PANTHER)	no GO terms	no GO terms
HSK10063_c0_g1_i1	chloroplastic group IIA intron splicing facilitator CRS1, chloroplastic	415	20	8.21774e-65	69.53	2	P:GO:0000373; F:GO:0003723	P:Group II intron splicing; F:RNA binding			mobidb-lite (MOBIDB_LITE); PTHR31846 (PANTHER); PTHR31846:SF10 (PANTHER)	no GO terms	no GO terms
HSK10063_c0_g1_i2	chloroplastic group IIA intron splicing facilitator CRS1, chloroplastic	502	20	9.88196e-81	70.25	2	P:GO:0000373; F:GO:0003723	P:Group II intron splicing; F:RNA binding			mobidb-lite (MOBIDB_LITE); PTHR31846 (PANTHER); PTHR31846:SF10 (PANTHER)	no GO terms	no GO terms
HSK10064_c0_g1_i1	glycine-rich protein 2-like	380	20	7.08305e-48	89.98	3	F:GO:0003677; P:GO:0006355; F:GO:0008270	F:DNA binding; P:regulation of transcription, DNA-templated; F:zinc ion binding			IPR002059 (PRINTS); G3DSA:2.40.50.140 (GENE3D); IPR002059 (PFAM); mobidb-lite (MOBIDB_LITE); PTHR11544 (PANTHER); PTHR11544:SF57 (PANTHER); IPR002059 (CDD); IPR012340 (SUPERFAMILY)	F:GO:0003677; P:GO:0006355	F:DNA binding; P:regulation of transcription, DNA-templated
HSK10065_c0_g1_i1	---NA---	729									no IPS match	no IPS match	no IPS match
HSK10066_c0_g1_i1	---NA---	301									no IPS match	no IPS match	no IPS match
HSK10066_c0_g1_i2	putative HVA22-like protein g	316	7	1.15851e-16	89.82	1	C:GO:0016020	C:membrane			no IPS match	no IPS match	no IPS match
HSK10067_c0_g1_i1	ribonuclease P protein subunit p25-like protein	1114	20	1.64105e-113	88.94	2	F:GO:0003676; C:GO:0016021	F:nucleic acid binding; C:integral component of membrane			IPR036882 (G3DSA:3.30.110.GENE3D); IPR002775 (PFAM); mobidb-lite (MOBIDB_LITE); mobidb-lite (MOBIDB_LITE); mobidb-lite (MOBIDB_LITE); PTHR13516:SF10 (PANTHER); PTHR13516 (PANTHER); IPR036882 (SUPERFAMILY)	F:GO:0003676	F:nucleic acid binding
HSK10068_c0_g1_i1	hypothetical protein CUMW_053040	433	7	3.58064e-61	91.77	1	F:GO:0016779	F:nucleotidyltransferase activity			mobidb-lite (MOBIDB_LITE)	no GO terms	no GO terms
HSK10069_c0_g1_i1	---NA---	1134									PS51257 (PROSITE_PROFILES)	no GO terms	no GO terms
HSK1007_c0_g1_i1	---NA---	204									no IPS match	no IPS match	no IPS match
HSK1007_c0_g2_i1	---NA---	272									no IPS match	no IPS match	no IPS match
HSK10070_c0_g1_i1	pyruvate kinase isozyme A, chloroplastic	604	20	3.68875e-111	75.78	8	F:GO:0000287; F:GO:0004743; P:GO:0006094; P:GO:0006096; P:GO:0006144; P:GO:0015976; F:GO:0016301; F:GO:0030955	F:magnesium ion binding; F:pyruvate kinase activity; P:gluconeogenesis; P:glycolytic process; P:purine nucleobase metabolic process; P:carbon utilization; F:kinase activity; F:potassium ion binding	EC:2.7.1.40	Pyruvate kinase	G3DSA:3.20.20.60 (GENE3D); IPR015793 (PFAM); IPR001697 (PANTHER); PTHR11817:SF14 (PANTHER); IPR015813 (SUPERFAMILY)	F:GO:0000287; F:GO:0003824; F:GO:0004743; P:GO:0006096; F:GO:0030955	F:magnesium ion binding; F:catalytic activity; F:pyruvate kinase activity; P:glycolytic process; F:potassium ion binding
HSK10071_c0_g1_i1	heme-binding-like protein At3g10130, chloroplastic isoform X2	898	20	1.44407e-163	94.26						IPR006917 (PFAM); IPR011256 (G3DSA:3.20.80.GENE3D); IPR006917 (PANTHER); PTHR11220:SF50 (PANTHER); IPR011256 (SUPERFAMILY)	no GO terms	no GO terms
HSK10072_c0_g1_i1	B3 domain-containing protein Os01g0905400-like isoform X2	249	20	1.50688e-51	88.91	3	F:GO:0003677; C:GO:0005634; P:GO:0006355	F:DNA binding; C:nucleus; P:regulation of transcription, DNA-templated			no IPS match	no IPS match	no IPS match
HSK10072_c0_g2_i1	B3 domain-containing protein Os01g0905400-like isoform X2	1548	20	0	71.45	3	F:GO:0003677; C:GO:0005634; P:GO:0006355	F:DNA binding; C:nucleus; P:regulation of transcription, DNA-templated			mobidb-lite (MOBIDB_LITE); mobidb-lite (MOBIDB_LITE)	no GO terms	no GO terms
HSK10072_c0_g3_i1	B3 domain-containing protein Os01g0905400-like	534	20	8.27418e-99	85.23	3	F:GO:0003677; C:GO:0005634; P:GO:0006355	F:DNA binding; C:nucleus; P:regulation of transcription, DNA-templated			IPR015300 (G3DSA:2.40.330.GENE3D); IPR003340 (PFAM); PTHR31391:SF6 (PANTHER); PTHR31391 (PANTHER); IPR003340 (PROSITE_PROFILES); IPR003340 (CDD); IPR015300 (SUPERFAMILY)	F:GO:0003677	F:DNA binding
HSK10073_c0_g1_i1	3-ketoacyl-CoA synthase 11	649	20	9.85611e-152	97.83	3	P:GO:0006633; C:GO:0016021; F:GO:0016747	P:fatty acid biosynthetic process; C:integral component of membrane; F:transferase activity, transferring acyl groups other than amino-acyl groups			IPR013601 (PFAM); IPR013747 (PFAM); IPR016039 (G3DSA:3.40.47.GENE3D); IPR012392 (PANTHER); PTHR31561:SF19 (PANTHER); IPR016039 (SUPERFAMILY)	F:GO:0003824; P:GO:0006633; P:GO:0008152; C:GO:0016020; F:GO:0016747	F:catalytic activity; P:fatty acid biosynthetic process; P:metabolic process; C:membrane; F:transferase activity, transferring acyl groups other than amino-acyl groups
HSK10074_c0_g1_i1	probable trehalose-phosphate phosphatase C	818	18	1.18136e-39	77.43	8	F:GO:0004805; F:GO:0005216; P:GO:0005982; P:GO:0005985; P:GO:0005992; C:GO:0016021; P:GO:0016311; P:GO:0034220	F:trehalose-phosphatase activity; F:ion channel activity; P:starch metabolic process; P:sucrose metabolic process; P:trehalose biosynthetic process; C:integral component of membrane; P:dephosphorylation; P:ion transmembrane transport	EC:3.1.3.12; EC:3.1.3.41	Trehalose-phosphatase; 4-nitrophenylphosphatase	mobidb-lite (MOBIDB_LITE)	no GO terms	no GO terms
HSK10074_c0_g1_i2	---NA---	306									no IPS match	no IPS match	no IPS match
HSK10074_c0_g1_i3	probable trehalose-phosphate phosphatase C	603	20	1.90042e-92	93.41	8	F:GO:0004805; F:GO:0005216; P:GO:0005982; P:GO:0005985; P:GO:0005992; C:GO:0016021; P:GO:0016311; P:GO:0034220	F:trehalose-phosphatase activity; F:ion channel activity; P:starch metabolic process; P:sucrose metabolic process; P:trehalose biosynthetic process; C:integral component of membrane; P:dephosphorylation; P:ion transmembrane transport	EC:3.1.3.12; EC:3.1.3.41	Trehalose-phosphatase; 4-nitrophenylphosphatase	IPR023214 (G3DSA:3.40.50.GENE3D); IPR003337 (TIGRFAM); IPR003337 (PFAM); PTHR43768 (PANTHER); PTHR43768:SF4 (PANTHER); IPR036412 (SUPERFAMILY)	F:GO:0003824; P:GO:0005992	F:catalytic activity; P:trehalose biosynthetic process
HSK10074_c0_g1_i4	probable trehalose-phosphate phosphatase C	1459	20	0	89.4	8	F:GO:0004805; F:GO:0005216; P:GO:0005982; P:GO:0005985; P:GO:0005992; C:GO:0016021; P:GO:0016311; P:GO:0034220	F:trehalose-phosphatase activity; F:ion channel activity; P:starch metabolic process; P:sucrose metabolic process; P:trehalose biosynthetic process; C:integral component of membrane; P:dephosphorylation; P:ion transmembrane transport	EC:3.1.3.12; EC:3.1.3.41	Trehalose-phosphatase; 4-nitrophenylphosphatase	IPR003337 (TIGRFAM); IPR003337 (PFAM); IPR023214 (G3DSA:3.40.50.GENE3D); IPR006379 (TIGRFAM); mobidb-lite (MOBIDB_LITE); PTHR43768 (PANTHER); PTHR43768:SF4 (PANTHER); cd01627 (CDD); IPR036412 (SUPERFAMILY)	F:GO:0003824; P:GO:0005992	F:catalytic activity; P:trehalose biosynthetic process
HSK10074_c0_g1_i5	probable trehalose-phosphate phosphatase C	728	17	4.80962e-40	79.58	8	F:GO:0004805; F:GO:0005216; P:GO:0005982; P:GO:0005985; P:GO:0005992; C:GO:0016021; P:GO:0016311; P:GO:0034220	F:trehalose-phosphatase activity; F:ion channel activity; P:starch metabolic process; P:sucrose metabolic process; P:trehalose biosynthetic process; C:integral component of membrane; P:dephosphorylation; P:ion transmembrane transport	EC:3.1.3.12; EC:3.1.3.41	Trehalose-phosphatase; 4-nitrophenylphosphatase	mobidb-lite (MOBIDB_LITE)	no GO terms	no GO terms
HSK10074_c0_g1_i6	probable trehalose-phosphate phosphatase C	1349	20	0	89.4	8	F:GO:0004805; F:GO:0005216; P:GO:0005982; P:GO:0005985; P:GO:0005992; C:GO:0016021; P:GO:0016311; P:GO:0034220	F:trehalose-phosphatase activity; F:ion channel activity; P:starch metabolic process; P:sucrose metabolic process; P:trehalose biosynthetic process; C:integral component of membrane; P:dephosphorylation; P:ion transmembrane transport	EC:3.1.3.12; EC:3.1.3.41	Trehalose-phosphatase; 4-nitrophenylphosphatase	IPR003337 (TIGRFAM); IPR003337 (PFAM); IPR023214 (G3DSA:3.40.50.GENE3D); IPR006379 (TIGRFAM); mobidb-lite (MOBIDB_LITE); PTHR43768 (PANTHER); PTHR43768:SF4 (PANTHER); cd01627 (CDD); IPR036412 (SUPERFAMILY)	F:GO:0003824; P:GO:0005992	F:catalytic activity; P:trehalose biosynthetic process
HSK10074_c0_g1_i7	probable trehalose-phosphate phosphatase C	708	17	3.86711e-40	79.58	8	F:GO:0004805; F:GO:0005216; P:GO:0005982; P:GO:0005985; P:GO:0005992; C:GO:0016021; P:GO:0016311; P:GO:0034220	F:trehalose-phosphatase activity; F:ion channel activity; P:starch metabolic process; P:sucrose metabolic process; P:trehalose biosynthetic process; C:integral component of membrane; P:dephosphorylation; P:ion transmembrane transport	EC:3.1.3.12; EC:3.1.3.41	Trehalose-phosphatase; 4-nitrophenylphosphatase	mobidb-lite (MOBIDB_LITE)	no GO terms	no GO terms
HSK10074_c0_g1_i8	probable trehalose-phosphate phosphatase C	1369	20	0	89.4	8	F:GO:0004805; F:GO:0005216; P:GO:0005982; P:GO:0005985; P:GO:0005992; C:GO:0016021; P:GO:0016311; P:GO:0034220	F:trehalose-phosphatase activity; F:ion channel activity; P:starch metabolic process; P:sucrose metabolic process; P:trehalose biosynthetic process; C:integral component of membrane; P:dephosphorylation; P:ion transmembrane transport	EC:3.1.3.12; EC:3.1.3.41	Trehalose-phosphatase; 4-nitrophenylphosphatase	IPR003337 (TIGRFAM); IPR003337 (PFAM); IPR023214 (G3DSA:3.40.50.GENE3D); IPR006379 (TIGRFAM); mobidb-lite (MOBIDB_LITE); PTHR43768 (PANTHER); PTHR43768:SF4 (PANTHER); cd01627 (CDD); IPR036412 (SUPERFAMILY)	F:GO:0003824; P:GO:0005992	F:catalytic activity; P:trehalose biosynthetic process
HSK10075_c0_g1_i1	probable long-chain-alcohol O-fatty-acyltransferase 5	537	20	3.05233e-103	78.27	3	F:GO:0008374; C:GO:0016021; P:GO:0042967	F:O-acyltransferase activity; C:integral component of membrane; P:obsolete acyl-carrier-protein biosynthetic process			IPR032805 (PFAM); PTHR31595:SF13 (PANTHER); PTHR31595 (PANTHER)	no GO terms	no GO terms
HSK10075_c0_g2_i1	probable long-chain-alcohol O-fatty-acyltransferase 5	243	20	2.22861e-35	84.98	7	P:GO:0006355; F:GO:0008374; C:GO:0016021; P:GO:0031062; P:GO:0042967; P:GO:0048831; P:GO:0050896	P:regulation of transcription, DNA-templated; F:O-acyltransferase activity; C:integral component of membrane; P:positive regulation of histone methylation; P:obsolete acyl-carrier-protein biosynthetic process; P:regulation of shoot system development; P:response to stimulus			PTHR31595:SF13 (PANTHER); PTHR31595 (PANTHER)	no GO terms	no GO terms
HSK10076_c0_g1_i1	---NA---	1010									mobidb-lite (MOBIDB_LITE)	no GO terms	no GO terms
HSK10076_c0_g1_i2	---NA---	1061									mobidb-lite (MOBIDB_LITE)	no GO terms	no GO terms
HSK10077_c0_g1_i1	protein FAR1-RELATED SEQUENCE 5-like	463	20	4.06987e-43	76.3	1	P:GO:0006355	P:regulation of transcription, DNA-templated			IPR004330 (PFAM); IPR031052 (PANTHER); PTHR31669:SF25 (PANTHER)	P:GO:0006355	P:regulation of transcription, DNA-templated
HSK10077_c0_g1_i2	protein FAR1-RELATED SEQUENCE 5-like	292	8	8.2468e-10	71.02	1	P:GO:0006355	P:regulation of transcription, DNA-templated			no IPS match	no IPS match	no IPS match
HSK10078_c0_g1_i1	ribosomal protein L11 methyltransferase-like isoform X2	264	20	1.74692e-57	83.05	2	P:GO:0006479; F:GO:0008276	P:protein methylation; F:protein methyltransferase activity			no IPS match	no IPS match	no IPS match
HSK10078_c0_g2_i1	ribosomal protein L11 methyltransferase-like isoform X2	266	7	2.54378e-07	96.75	2	P:GO:0006479; F:GO:0008276	P:protein methylation; F:protein methyltransferase activity			no IPS match	no IPS match	no IPS match
HSK10079_c0_g1_i1	probable inactive receptor kinase At1g27190	464	20	1.84904e-57	92.56	1	C:GO:0016021	C:integral component of membrane			no IPS match	no IPS match	no IPS match
HSK10079_c0_g1_i2	probable LRR receptor-like serine/threonine-protein kinase At1g53420 isoform X12	1029	20	7.87368e-176	83.74	2	F:GO:0005515; C:GO:0016021	F:protein binding; C:integral component of membrane			PR00019 (PRINTS); IPR001611 (PFAM); IPR032675 (G3DSA:3.80.10.GENE3D); IPR032675 (G3DSA:3.80.10.GENE3D); PTHR27000 (PANTHER); SSF52058 (SUPERFAMILY)	F:GO:0005515	F:protein binding
HSK1008_c0_g1_i1	---NA---	268									no IPS match	no IPS match	no IPS match
HSK10080_c0_g1_i1	ribosomal lysine N-methyltransferase 3	711	20	3.19415e-151	77.33	2	F:GO:0016279; P:GO:0018026	F:protein-lysine N-methyltransferase activity; P:peptidyl-lysine monomethylation			G3DSA:3.90.1410.10 (GENE3D); G3DSA:3.90.1410.10 (GENE3D); mobidb-lite (MOBIDB_LITE); PTHR13271 (PANTHER); PTHR13271:SF82 (PANTHER); SSF82199 (SUPERFAMILY); SSF82199 (SUPERFAMILY)	no GO terms	no GO terms
HSK10081_c0_g1_i1	UBX domain-containing protein 1-like	238	20	2.25725e-13	86.87	1	F:GO:0005515	F:protein binding			G3DSA:1.10.8.10 (GENE3D); PTHR13020:SF33 (PANTHER); PTHR13020 (PANTHER); IPR009060 (SUPERFAMILY)	F:GO:0005515	F:protein binding
HSK10081_c0_g2_i1	UBX domain-containing protein 4-like	730	20	9.79495e-150	83.63	1	F:GO:0003676	F:nucleic acid binding			IPR018997 (PFAM); G3DSA:1.20.58.2190 (GENE3D); PTHR13020 (PANTHER); PTHR13020:SF33 (PANTHER); cd10461 (CDD); IPR036339 (SUPERFAMILY)	no GO terms	no GO terms
HSK10082_c0_g1_i1	transcription termination factor MTEF18, mitochondrial	1067	20	0	78.08	9	F:GO:0003690; F:GO:0003727; P:GO:0006355; P:GO:0008380; C:GO:0009507; P:GO:0009658; F:GO:0019843; P:GO:0032502; P:GO:0042255	F:double-stranded DNA binding; F:single-stranded RNA binding; P:regulation of transcription, DNA-templated; P:RNA splicing; C:chloroplast; P:chloroplast organization; F:rRNA binding; P:developmental process; P:ribosome assembly			IPR038538 (G3DSA:1.25.70.GENE3D); PTHR13068:SF38 (PANTHER); PTHR13068 (PANTHER)	no GO terms	no GO terms
HSK10083_c0_g1_i1	hypothetical protein CISIN_1g004200mg	337	20	1.20425e-62	95.95						PTHR32166:SF50 (PANTHER); PTHR32166 (PANTHER)	no GO terms	no GO terms
HSK10083_c0_g2_i1	PREDICTED: uncharacterized protein LOC102608326 isoform X2	427	20	3.54383e-55	99.16						mobidb-lite (MOBIDB_LITE); PTHR32166:SF50 (PANTHER); PTHR32166 (PANTHER)	no GO terms	no GO terms
HSK10084_c0_g1_i1	---NA---	542									no IPS match	no IPS match	no IPS match
HSK10084_c0_g1_i2	---NA---	541									no IPS match	no IPS match	no IPS match
HSK10085_c0_g1_i1	PLASMODESMATA CALLOSE-BINDING PROTEIN 3-like	481	20	1.40868e-18	73.83	1	F:GO:0016787	F:hydrolase activity			no IPS match	no IPS match	no IPS match
HSK10085_c0_g1_i2	PLASMODESMATA CALLOSE-BINDING PROTEIN 3-like	1170	20	1.52805e-80	75.73	4	F:GO:0004553; P:GO:0005975; F:GO:0030247; C:GO:0046658	F:hydrolase activity, hydrolyzing O-glycosyl compounds; P:carbohydrate metabolic process; F:polysaccharide binding; C:anchored component of plasma membrane			PR01217 (PRINTS); IPR012946 (PFAM); mobidb-lite (MOBIDB_LITE); mobidb-lite (MOBIDB_LITE); PTHR32227:SF118 (PANTHER); PTHR32227 (PANTHER)	no GO terms	no GO terms
HSK10085_c0_g1_i3	PLASMODESMATA CALLOSE-BINDING PROTEIN 3-like	1206	20	2.23451e-86	75.8	4	F:GO:0004553; P:GO:0005975; F:GO:0030247; C:GO:0046658	F:hydrolase activity, hydrolyzing O-glycosyl compounds; P:carbohydrate metabolic process; F:polysaccharide binding; C:anchored component of plasma membrane			PR01217 (PRINTS); IPR012946 (PFAM); mobidb-lite (MOBIDB_LITE); mobidb-lite (MOBIDB_LITE); PTHR32227 (PANTHER); PTHR32227:SF118 (PANTHER)	no GO terms	no GO terms
HSK10086_c0_g1_i1	---NA---	232									no IPS match	no IPS match	no IPS match
HSK10087_c0_g1_i1	phospholipase A(1) LCAT3 isoform X2	319	20	6.03748e-46	91.53	3	P:GO:0006629; F:GO:0008374; P:GO:0042967	P:lipid metabolic process; F:O-acyltransferase activity; P:obsolete acyl-carrier-protein biosynthetic process			PTHR11440 (PANTHER); PTHR11440:SF53 (PANTHER)	no GO terms	no GO terms
HSK10088_c0_g1_i1	ATP-dependent DNA helicase Q-like 3	845	20	4.53466e-91	82.87	5	F:GO:0003676; F:GO:0005524; C:GO:0005634; P:GO:0006310; F:GO:0008026	F:nucleic acid binding; F:ATP binding; C:nucleus; P:DNA recombination; F:ATP-dependent helicase activity	EC:3.6.1.3; EC:3.6.1.15	Adenosinetriphosphatase; Nucleoside-triphosphate phosphatase	mobidb-lite (MOBIDB_LITE)	no GO terms	no GO terms
HSK10089_c0_g1_i1	---NA---	839									mobidb-lite (MOBIDB_LITE)	no GO terms	no GO terms
HSK1009_c0_g1_i1	oligopeptide transporter 1-like	266	20	6.83336e-42	90.3	2	C:GO:0016021; P:GO:0055085	C:integral component of membrane; P:transmembrane transport			IPR004813 (PFAM); PTHR22601:SF46 (PANTHER); PTHR22601 (PANTHER)	P:GO:0055085	P:transmembrane transport
HSK10090_c0_g1_i1	cyclic nucleotide-gated ion channel 2	1049	20	0	82.93	5	P:GO:0009987; C:GO:0016021; P:GO:0030001; P:GO:0098655; F:GO:0099094	P:cellular process; C:integral component of membrane; P:metal ion transport; P:cation transmembrane transport; F:ligand-gated cation channel activity			PTHR10217 (PANTHER); PTHR10217:SF501 (PANTHER); SSF81324 (SUPERFAMILY)	no GO terms	no GO terms
HSK10091_c0_g1_i1	---NA---	718									no IPS match	no IPS match	no IPS match
HSK10092_c0_g1_i1	auxin-induced protein 15A-like	301	20	2.06162e-25	93.11	1	P:GO:0009733	P:response to auxin			no IPS match	no IPS match	no IPS match
HSK10092_c1_g1_i1	auxin-responsive protein SAUR21-like	480	20	3.71346e-66	83.64	1	P:GO:0009733	P:response to auxin			IPR003676 (PFAM); PTHR31929:SF28 (PANTHER); PTHR31929 (PANTHER)	P:GO:0009733	P:response to auxin
HSK10093_c0_g1_i1	hypothetical protein CISIN_1g033202mg	327	1	1.08797e-21	100						no IPS match	no IPS match	no IPS match
HSK10093_c0_g2_i1	hypothetical protein CISIN_1g033202mg	206	1	2.55056e-45	100						no IPS match	no IPS match	no IPS match
HSK10093_c0_g3_i1	---NA---	414									no IPS match	no IPS match	no IPS match
HSK10094_c0_g1_i1	small heat shock protein, chloroplastic-like	1109	20	6.05389e-169	74.88						IPR002068 (PFAM); IPR008978 (G3DSA:2.60.40.GENE3D); mobidb-lite (MOBIDB_LITE); mobidb-lite (MOBIDB_LITE); PTHR11527:SF137 (PANTHER); IPR031107 (PANTHER); IPR002068 (PROSITE_PROFILES); cd06464 (CDD); IPR008978 (SUPERFAMILY)	no GO terms	no GO terms
HSK10095_c0_g1_i1	hypothetical protein CICLE_v10030486mg	405	20	3.844e-89	83.49						PTHR32387 (PANTHER); PTHR32387:SF3 (PANTHER)	no GO terms	no GO terms
HSK10095_c1_g1_i1	PREDICTED: uncharacterized protein LOC102612494	498	20	2.33802e-107	85.24						PTHR32387 (PANTHER); PTHR32387:SF3 (PANTHER)	no GO terms	no GO terms
HSK10096_c0_g1_i1	putative pentatricopeptide repeat-containing protein At3g05240	636	20	4.40973e-141	82.45	1	F:GO:0005515	F:protein binding			IPR002885 (TIGRFAM); IPR011990 (G3DSA:1.25.40.GENE3D); IPR002885 (PFAM); IPR002885 (PFAM); IPR011990 (G3DSA:1.25.40.GENE3D); PTHR24015:SF1610 (PANTHER); PTHR24015 (PANTHER); IPR002885 (PROSITE_PROFILES); IPR002885 (PROSITE_PROFILES); IPR002885 (PROSITE_PROFILES); IPR002885 (PROSITE_PROFILES)	F:GO:0005515	F:protein binding
HSK10096_c0_g2_i1	putative pentatricopeptide repeat-containing protein At3g05240	339	20	1.04132e-71	78.74	6	F:GO:0003723; F:GO:0004519; F:GO:0005515; C:GO:0009507; P:GO:0031425; P:GO:1900865	F:RNA binding; F:endonuclease activity; F:protein binding; C:chloroplast; P:chloroplast RNA processing; P:chloroplast RNA modification			IPR002885 (TIGRFAM); IPR002885 (PFAM); IPR011990 (G3DSA:1.25.40.GENE3D); IPR002885 (PFAM); PTHR24015 (PANTHER); PTHR24015:SF6 (PANTHER); IPR002885 (PROSITE_PROFILES); IPR002885 (PROSITE_PROFILES); IPR002885 (PROSITE_PROFILES)	F:GO:0005515	F:protein binding
HSK10097_c0_g1_i1	kinesin light chain 3 isoform X1	572	20	8.80523e-110	83.72	2	F:GO:0005515; C:GO:0016021	F:protein binding; C:integral component of membrane			PF13424 (PFAM); IPR011990 (G3DSA:1.25.40.GENE3D); PTHR19959:SF159 (PANTHER); PTHR19959 (PANTHER); IPR011990 (SUPERFAMILY)	F:GO:0005515	F:protein binding
HSK10098_c0_g1_i1	B3 domain-containing transcription factor VRN1-like	428	20	1.19097e-99	81.64	3	F:GO:0003677; C:GO:0005634; P:GO:0006355	F:DNA binding; C:nucleus; P:regulation of transcription, DNA-templated			IPR015300 (G3DSA:2.40.330.GENE3D); IPR003340 (PFAM); PTHR31920:SF22 (PANTHER); PTHR31920 (PANTHER); IPR003340 (PROSITE_PROFILES); IPR003340 (CDD); IPR015300 (SUPERFAMILY)	F:GO:0003677	F:DNA binding
HSK10098_c0_g2_i1	B3 domain-containing transcription factor VRN1-like isoform X1	789	20	1.34088e-177	67.28	3	F:GO:0003677; C:GO:0005634; P:GO:0006355	F:DNA binding; C:nucleus; P:regulation of transcription, DNA-templated			IPR015300 (G3DSA:2.40.330.GENE3D); PTHR31920:SF22 (PANTHER); PTHR31920 (PANTHER); IPR003340 (PROSITE_PROFILES); IPR015300 (SUPERFAMILY)	F:GO:0003677	F:DNA binding
HSK10098_c0_g3_i1	B3 domain-containing transcription factor VRN1-like isoform X1	321	20	2.65058e-72	85.38	3	F:GO:0003677; C:GO:0005634; P:GO:0006355	F:DNA binding; C:nucleus; P:regulation of transcription, DNA-templated			IPR015300 (G3DSA:2.40.330.GENE3D); IPR003340 (PFAM); PTHR31920 (PANTHER); PTHR31920:SF22 (PANTHER); IPR003340 (PROSITE_PROFILES); IPR003340 (CDD); IPR015300 (SUPERFAMILY)	F:GO:0003677	F:DNA binding
HSK10099_c0_g1_i1	---NA---	822									no IPS match	no IPS match	no IPS match
HSK101_c0_g1_i1	---NA---	236									no IPS match	no IPS match	no IPS match
HSK1010_c0_g1_i1	myb-like protein A	290	20	1.61129e-52	96.1	14	F:GO:0003677; F:GO:0003700; C:GO:0005634; C:GO:0005667; P:GO:0006355; P:GO:0009739; P:GO:0009789; P:GO:0043068; P:GO:0045893; P:GO:0048235; P:GO:0080092; C:GO:0090406; P:GO:1901371; P:GO:1990019	F:DNA binding; F:DNA binding transcription factor activity; C:nucleus; C:transcription factor complex; P:regulation of transcription, DNA-templated; P:response to gibberellin; P:positive regulation of abscisic acid-activated signaling pathway; P:positive regulation of programmed cell death; P:positive regulation of transcription, DNA-templated; P:pollen sperm cell differentiation; P:regulation of…			no IPS match	no IPS match	no IPS match
HSK10100_c0_g1_i1	protein DETOXIFICATION 27-like	774	20	3.38891e-170	91.7	4	P:GO:0006855; F:GO:0015238; F:GO:0015297; C:GO:0016021	P:drug transmembrane transport; F:drug transmembrane transporter activity; F:antiporter activity; C:integral component of membrane			IPR002528 (PFAM); PTHR11206:SF80 (PANTHER); PTHR11206 (PANTHER)	P:GO:0006855; F:GO:0015238; F:GO:0015297; C:GO:0016020; P:GO:0055085	P:drug transmembrane transport; F:drug transmembrane transporter activity; F:antiporter activity; C:membrane; P:transmembrane transport
HSK10101_c0_g1_i1	---NA---	444									no IPS match	no IPS match	no IPS match
HSK10102_c0_g1_i1	hypothetical protein CUMW_147400	340	20	2.61997e-62	86.35	1	C:GO:0016021	C:integral component of membrane			PTHR36342 (PANTHER)	no GO terms	no GO terms
HSK10102_c0_g1_i2	PTB domain-containing engulfment adapter protein 1 isoform 1	847	20	6.59744e-121	84.19	1	C:GO:0016021	C:integral component of membrane			PTHR36342 (PANTHER)	no GO terms	no GO terms
HSK10102_c0_g1_i3	PREDICTED: uncharacterized protein LOC102620229 isoform X1	995	20	4.1126e-121	86.03	1	C:GO:0016021	C:integral component of membrane			PTHR36342 (PANTHER)	no GO terms	no GO terms
HSK10103_c0_g1_i1	CST complex subunit CTC1	641	20	2.92943e-145	70.28	1	P:GO:0000723	P:telomere maintenance			PTHR14865 (PANTHER)	no GO terms	no GO terms
HSK10104_c0_g1_i1	poly(A) polymerase, putative	1930	20	0	83.29	3	F:GO:0003723; F:GO:0004652; P:GO:0006396	F:RNA binding; F:polynucleotide adenylyltransferase activity; P:RNA processing	EC:2.7.7.19	Polynucleotide adenylyltransferase	IPR002646 (PFAM); IPR032828 (PFAM); G3DSA:3.30.460.10 (GENE3D); G3DSA:1.10.3090.10 (GENE3D); mobidb-lite (MOBIDB_LITE); PTHR43051 (PANTHER); PTHR43051:SF1 (PANTHER); PTHR43051 (PANTHER); PTHR43051:SF1 (PANTHER); SSF81301 (SUPERFAMILY); SSF81891 (SUPERFAMILY)	F:GO:0003723; P:GO:0006396; F:GO:0016779	F:RNA binding; P:RNA processing; F:nucleotidyltransferase activity
HSK10104_c0_g1_i2	poly(A) polymerase, putative	1945	20	0	83.9	3	F:GO:0003723; F:GO:0004652; P:GO:0006396	F:RNA binding; F:polynucleotide adenylyltransferase activity; P:RNA processing	EC:2.7.7.19	Polynucleotide adenylyltransferase	IPR032828 (PFAM); G3DSA:3.30.460.10 (GENE3D); IPR002646 (PFAM); G3DSA:1.10.3090.10 (GENE3D); mobidb-lite (MOBIDB_LITE); PTHR43051:SF1 (PANTHER); PTHR43051 (PANTHER); PTHR43051:SF1 (PANTHER); SSF81301 (SUPERFAMILY); SSF81891 (SUPERFAMILY)	F:GO:0003723; P:GO:0006396; F:GO:0016779	F:RNA binding; P:RNA processing; F:nucleotidyltransferase activity
HSK10105_c0_g1_i1	DNA polymerase kappa isoform X1	2503	20	0	88.01	7	F:GO:0003684; F:GO:0003887; P:GO:0006260; P:GO:0006281; C:GO:0016021; C:GO:0042575; P:GO:0071897	F:damaged DNA binding; F:DNA-directed DNA polymerase activity; P:DNA replication; P:DNA repair; C:integral component of membrane; C:DNA polymerase complex; P:DNA biosynthetic process	EC:2.7.7.7	DNA-directed DNA polymerase	G3DSA:1.10.150.810 (GENE3D); IPR024728 (PFAM); IPR036775 (G3DSA:3.30.1490.GENE3D); IPR017961 (PFAM); IPR001126 (PFAM); G3DSA:3.30.70.270 (GENE3D); PTHR11076 (PANTHER); PTHR11076:SF33 (PANTHER); IPR001126 (PROSITE_PROFILES); IPR022880 (CDD); IPR036775 (SUPERFAMILY); SSF56672 (SUPERFAMILY)	F:GO:0003684; F:GO:0003887; P:GO:0006281	F:damaged DNA binding; F:DNA-directed DNA polymerase activity; P:DNA repair
HSK10105_c0_g1_i2	DNA polymerase kappa	2261	20	0	88.15	6	F:GO:0003684; F:GO:0003887; P:GO:0006260; P:GO:0006281; C:GO:0042575; P:GO:0071897	F:damaged DNA binding; F:DNA-directed DNA polymerase activity; P:DNA replication; P:DNA repair; C:DNA polymerase complex; P:DNA biosynthetic process	EC:2.7.7.7	DNA-directed DNA polymerase	G3DSA:3.30.70.270 (GENE3D); G3DSA:2.30.40.20 (GENE3D); IPR001126 (PFAM); IPR036775 (G3DSA:3.30.1490.GENE3D); IPR017061 (PIRSF); IPR017961 (PFAM); G3DSA:1.10.150.810 (GENE3D); mobidb-lite (MOBIDB_LITE); PTHR11076:SF33 (PANTHER); PTHR11076 (PANTHER); IPR022880 (HAMAP); IPR001126 (PROSITE_PROFILES); IPR022880 (CDD); IPR036775 (SUPERFAMILY); SSF56672 (SUPERFAMILY)	F:GO:0003684; F:GO:0003887; P:GO:0006281	F:damaged DNA binding; F:DNA-directed DNA polymerase activity; P:DNA repair
HSK10105_c0_g1_i3	DNA polymerase kappa	2219	20	0	86.39	6	F:GO:0003684; F:GO:0003887; P:GO:0006260; P:GO:0006281; C:GO:0042575; P:GO:0071897	F:damaged DNA binding; F:DNA-directed DNA polymerase activity; P:DNA replication; P:DNA repair; C:DNA polymerase complex; P:DNA biosynthetic process	EC:2.7.7.7	DNA-directed DNA polymerase	G3DSA:2.30.40.20 (GENE3D); IPR017961 (PFAM); G3DSA:1.10.150.810 (GENE3D); G3DSA:3.30.70.270 (GENE3D); IPR017061 (PIRSF); IPR036775 (G3DSA:3.30.1490.GENE3D); IPR001126 (PFAM); mobidb-lite (MOBIDB_LITE); PTHR11076:SF33 (PANTHER); PTHR11076 (PANTHER); IPR001126 (PROSITE_PROFILES); IPR022880 (CDD); IPR036775 (SUPERFAMILY); SSF56672 (SUPERFAMILY)	F:GO:0003684; F:GO:0003887; P:GO:0006281	F:damaged DNA binding; F:DNA-directed DNA polymerase activity; P:DNA repair
HSK10105_c0_g1_i4	DNA polymerase kappa	2371	20	0	91.06	7	F:GO:0003684; F:GO:0003887; P:GO:0006260; P:GO:0006281; C:GO:0016021; C:GO:0042575; P:GO:0071897	F:damaged DNA binding; F:DNA-directed DNA polymerase activity; P:DNA replication; P:DNA repair; C:integral component of membrane; C:DNA polymerase complex; P:DNA biosynthetic process	EC:2.7.7.7	DNA-directed DNA polymerase	G3DSA:1.10.150.810 (GENE3D); IPR017961 (PFAM); G3DSA:2.30.40.20 (GENE3D); IPR001126 (PFAM); G3DSA:3.30.70.270 (GENE3D); IPR036775 (G3DSA:3.30.1490.GENE3D); IPR024728 (PFAM); IPR017061 (PIRSF); mobidb-lite (MOBIDB_LITE); PTHR11076:SF33 (PANTHER); PTHR11076 (PANTHER); IPR001126 (PROSITE_PROFILES); IPR022880 (CDD); IPR036775 (SUPERFAMILY); SSF56672 (SUPERFAMILY)	F:GO:0003684; F:GO:0003887; P:GO:0006281	F:damaged DNA binding; F:DNA-directed DNA polymerase activity; P:DNA repair
HSK10105_c0_g1_i5	DNA polymerase kappa isoform X1	2413	20	0	93.89	7	F:GO:0003684; F:GO:0003887; P:GO:0006260; P:GO:0006281; C:GO:0016021; C:GO:0042575; P:GO:0071897	F:damaged DNA binding; F:DNA-directed DNA polymerase activity; P:DNA replication; P:DNA repair; C:integral component of membrane; C:DNA polymerase complex; P:DNA biosynthetic process	EC:2.7.7.7	DNA-directed DNA polymerase	G3DSA:2.30.40.20 (GENE3D); IPR017061 (PIRSF); IPR036775 (G3DSA:3.30.1490.GENE3D); IPR024728 (PFAM); IPR017961 (PFAM); G3DSA:3.30.70.270 (GENE3D); IPR001126 (PFAM); G3DSA:1.10.150.810 (GENE3D); mobidb-lite (MOBIDB_LITE); PTHR11076:SF33 (PANTHER); PTHR11076 (PANTHER); IPR001126 (PROSITE_PROFILES); IPR022880 (CDD); IPR036775 (SUPERFAMILY); SSF56672 (SUPERFAMILY)	F:GO:0003684; F:GO:0003887; P:GO:0006281	F:damaged DNA binding; F:DNA-directed DNA polymerase activity; P:DNA repair
HSK10105_c0_g1_i6	DNA polymerase kappa	2351	20	0	84.84	6	F:GO:0003684; F:GO:0003887; P:GO:0006260; P:GO:0006281; C:GO:0042575; P:GO:0071897	F:damaged DNA binding; F:DNA-directed DNA polymerase activity; P:DNA replication; P:DNA repair; C:DNA polymerase complex; P:DNA biosynthetic process	EC:2.7.7.7	DNA-directed DNA polymerase	IPR036775 (G3DSA:3.30.1490.GENE3D); G3DSA:3.30.70.270 (GENE3D); IPR017961 (PFAM); G3DSA:1.10.150.810 (GENE3D); IPR001126 (PFAM); IPR024728 (PFAM); PTHR11076:SF33 (PANTHER); PTHR11076 (PANTHER); IPR001126 (PROSITE_PROFILES); IPR022880 (CDD); IPR036775 (SUPERFAMILY); SSF56672 (SUPERFAMILY)	F:GO:0003684; F:GO:0003887; P:GO:0006281	F:damaged DNA binding; F:DNA-directed DNA polymerase activity; P:DNA repair
HSK10106_c0_g1_i1	cancer-related nucleoside-triphosphatase	485	20	1.6297e-66	92.84	3	P:GO:0016311; F:GO:0017111; F:GO:0098519	P:dephosphorylation; F:nucleoside-triphosphatase activity; F:nucleotide phosphatase activity, acting on free nucleotides	EC:3.1.3.41; EC:3.6.1.15	4-nitrophenylphosphatase; Nucleoside-triphosphate phosphatase	IPR004948 (PFAM); G3DSA:3.40.50.300 (GENE3D); PTHR43146 (PANTHER); IPR027417 (SUPERFAMILY)	F:GO:0098519	F:nucleotide phosphatase activity, acting on free nucleotides
HSK10107_c0_g1_i1	---NA---	348									mobidb-lite (MOBIDB_LITE)	no GO terms	no GO terms
HSK10107_c0_g1_i2	hypothetical protein CUMW_213340	816	3	7.32902e-55	99.72						mobidb-lite (MOBIDB_LITE)	no GO terms	no GO terms
HSK10107_c0_g2_i1	---NA---	254									no IPS match	no IPS match	no IPS match
HSK10108_c0_g1_i1	---NA---	474									mobidb-lite (MOBIDB_LITE)	no GO terms	no GO terms
HSK10108_c0_g1_i2	---NA---	482									mobidb-lite (MOBIDB_LITE)	no GO terms	no GO terms
HSK10108_c0_g2_i1	---NA---	219									no IPS match	no IPS match	no IPS match
HSK10109_c0_g1_i1	midasin isoform X2	415	20	2.34744e-88	97.99	5	P:GO:0000027; F:GO:0005524; C:GO:0005634; C:GO:0016021; F:GO:0016887	P:ribosomal large subunit assembly; F:ATP binding; C:nucleus; C:integral component of membrane; F:ATPase activity	EC:3.6.1.3; EC:3.6.1.15	Adenosinetriphosphatase; Nucleoside-triphosphate phosphatase	IPR011704 (PFAM); G3DSA:3.40.50.300 (GENE3D); PTHR22908 (PANTHER); PTHR22908:SF66 (PANTHER); cd00009 (CDD); IPR027417 (SUPERFAMILY)	F:GO:0005524; F:GO:0016887	F:ATP binding; F:ATPase activity
HSK10109_c0_g1_i2	midasin isoform X3	245	20	1.50501e-42	95.92	5	P:GO:0000027; F:GO:0005524; C:GO:0005634; C:GO:0016021; F:GO:0016887	P:ribosomal large subunit assembly; F:ATP binding; C:nucleus; C:integral component of membrane; F:ATPase activity	EC:3.6.1.3; EC:3.6.1.15	Adenosinetriphosphatase; Nucleoside-triphosphate phosphatase	G3DSA:3.40.50.300 (GENE3D); IPR011704 (PFAM); PTHR22908:SF66 (PANTHER); PTHR22908 (PANTHER); IPR027417 (SUPERFAMILY)	F:GO:0005524; F:GO:0016887	F:ATP binding; F:ATPase activity
HSK10109_c0_g2_i1	midasin isoform X2	562	20	1.03099e-125	95.72	5	P:GO:0000027; F:GO:0005524; C:GO:0005634; C:GO:0016021; F:GO:0016887	P:ribosomal large subunit assembly; F:ATP binding; C:nucleus; C:integral component of membrane; F:ATPase activity	EC:3.6.1.3; EC:3.6.1.15	Adenosinetriphosphatase; Nucleoside-triphosphate phosphatase	G3DSA:3.40.50.300 (GENE3D); PTHR22908:SF66 (PANTHER); PTHR22908 (PANTHER); IPR027417 (SUPERFAMILY)	no GO terms	no GO terms
HSK10110_c0_g1_i1	bifunctional 3-dehydroquinate dehydratase/shikimate dehydrogenase, chloroplastic-like	1102	20	8.5093e-133	92.4	10	P:GO:0000162; F:GO:0003855; F:GO:0004764; P:GO:0006571; P:GO:0009094; P:GO:0009423; C:GO:0009570; P:GO:0019632; F:GO:0050661; P:GO:0055114	P:tryptophan biosynthetic process; F:3-dehydroquinate dehydratase activity; F:shikimate 3-dehydrogenase (NADP+) activity; P:tyrosine biosynthetic process; P:L-phenylalanine biosynthetic process; P:chorismate biosynthetic process; C:chloroplast stroma; P:shikimate metabolic process; F:NADP binding; P:oxidation-reduction process	EC:1.1.1.25; EC:4.2.1.10; EC:1.1.1.282	Shikimate dehydrogenase; 3-dehydroquinate dehydratase; Quinate/shikimate dehydrogenase	G3DSA:3.40.50.720 (GENE3D); IPR006151 (PFAM); PTHR21089 (PANTHER); PTHR21089:SF7 (PANTHER); cd01065 (CDD); IPR036291 (SUPERFAMILY)	no GO terms	no GO terms
HSK10110_c0_g1_i2	bifunctional 3-dehydroquinate dehydratase/shikimate dehydrogenase, chloroplastic-like	1020	20	2.07462e-173	92.28	8	P:GO:0000162; F:GO:0003855; F:GO:0004764; P:GO:0006571; P:GO:0009094; P:GO:0019632; F:GO:0050661; P:GO:0055114	P:tryptophan biosynthetic process; F:3-dehydroquinate dehydratase activity; F:shikimate 3-dehydrogenase (NADP+) activity; P:tyrosine biosynthetic process; P:L-phenylalanine biosynthetic process; P:shikimate metabolic process; F:NADP binding; P:oxidation-reduction process	EC:1.1.1.25; EC:4.2.1.10; EC:1.1.1.282	Shikimate dehydrogenase; 3-dehydroquinate dehydratase; Quinate/shikimate dehydrogenase	IPR013708 (PFAM); G3DSA:3.40.50.10860 (GENE3D); G3DSA:3.40.50.720 (GENE3D); IPR006151 (PFAM); PTHR21089:SF7 (PANTHER); PTHR21089 (PANTHER); cd01065 (CDD); IPR036291 (SUPERFAMILY); SSF53223 (SUPERFAMILY)	F:GO:0004764; P:GO:0055114	F:shikimate 3-dehydrogenase (NADP+) activity; P:oxidation-reduction process
HSK10111_c0_g1_i1	RNA polymerase sigma factor sigF, chloroplastic isoform X1	2114	20	0	92.5	7	F:GO:0001053; F:GO:0003677; F:GO:0003700; C:GO:0005667; P:GO:0006355; C:GO:0009507; P:GO:2000142	F:plastid sigma factor activity; F:DNA binding; F:DNA binding transcription factor activity; C:transcription factor complex; P:regulation of transcription, DNA-templated; C:chloroplast; P:regulation of DNA-templated transcription, initiation			IPR000943 (PRINTS); IPR036388 (G3DSA:1.10.10.GENE3D); IPR036388 (G3DSA:1.10.10.GENE3D); IPR007627 (PFAM); IPR007624 (PFAM); IPR016262 (PIRSF); G3DSA:1.10.601.10 (GENE3D); IPR007630 (PFAM); IPR014284 (TIGRFAM); mobidb-lite (MOBIDB_LITE); mobidb-lite (MOBIDB_LITE); PTHR30603:SF9 (PANTHER); PTHR30603 (PANTHER); cd06171 (CDD); IPR013324 (SUPERFAMILY); IPR013324 (SUPERFAMILY); IPR013325 (SUPERFAMILY)	F:GO:0003700; P:GO:0006352; P:GO:0006355	F:DNA binding transcription factor activity; P:DNA-templated transcription, initiation; P:regulation of transcription, DNA-templated
HSK10111_c0_g1_i2	RNA polymerase sigma factor sigF, chloroplastic isoform X3	703	20	4.84897e-110	93.74	7	F:GO:0001053; F:GO:0003677; F:GO:0003700; C:GO:0005667; P:GO:0006355; C:GO:0009507; P:GO:2000142	F:plastid sigma factor activity; F:DNA binding; F:DNA binding transcription factor activity; C:transcription factor complex; P:regulation of transcription, DNA-templated; C:chloroplast; P:regulation of DNA-templated transcription, initiation			IPR000943 (PRINTS); IPR007630 (PFAM); IPR007624 (PFAM); IPR036388 (G3DSA:1.10.10.GENE3D); IPR036388 (G3DSA:1.10.10.GENE3D); PTHR30603:SF9 (PANTHER); PTHR30603 (PANTHER); cd06171 (CDD); IPR013324 (SUPERFAMILY); IPR013324 (SUPERFAMILY)	F:GO:0003700; P:GO:0006352; P:GO:0006355	F:DNA binding transcription factor activity; P:DNA-templated transcription, initiation; P:regulation of transcription, DNA-templated
HSK10112_c0_g1_i1	putative disease resistance protein At3g14460 isoform X1	317	20	5.68158e-64	80.19	1	F:GO:0043531	F:ADP binding			PTHR23155:SF869 (PANTHER); PTHR23155 (PANTHER)	no GO terms	no GO terms
HSK10112_c0_g2_i1	putative disease resistance RPP13-like protein 1	902	20	0	82.5	1	F:GO:0043531	F:ADP binding			IPR032675 (G3DSA:3.80.10.GENE3D); PTHR23155 (PANTHER); PTHR23155:SF868 (PANTHER); SSF52058 (SUPERFAMILY)	no GO terms	no GO terms
HSK10113_c0_g1_i1	putative F-box protein PP2-B12	501	20	6.50596e-38	91.55						no IPS match	no IPS match	no IPS match
HSK10114_c0_g1_i1	secoisolariciresinol dehydrogenase-like isoform X2	402	20	1.00773e-60	93.91	2	F:GO:0016491; P:GO:0055114	F:oxidoreductase activity; P:oxidation-reduction process			PF13561 (PFAM); G3DSA:3.40.50.720 (GENE3D); PTHR43180:SF23 (PANTHER); PTHR43180 (PANTHER); IPR036291 (SUPERFAMILY)	no GO terms	no GO terms
HSK10114_c0_g1_i2	secoisolariciresinol dehydrogenase-like	1058	20	0	90.8	2	F:GO:0016491; P:GO:0055114	F:oxidoreductase activity; P:oxidation-reduction process			IPR002347 (PRINTS); IPR002347 (PRINTS); G3DSA:3.40.50.720 (GENE3D); PF13561 (PFAM); PTHR43180:SF23 (PANTHER); PTHR43180 (PANTHER); IPR036291 (SUPERFAMILY)	no GO terms	no GO terms
HSK10115_c0_g1_i1	VMA21-like domain protein	1671	20	4.10185e-34	91.07	5	C:GO:0005789; C:GO:0012507; C:GO:0016021; C:GO:0033116; P:GO:0070072	C:endoplasmic reticulum membrane; C:ER to Golgi transport vesicle membrane; C:integral component of membrane; C:endoplasmic reticulum-Golgi intermediate compartment membrane; P:vacuolar proton-transporting V-type ATPase complex assembly			IPR019013 (PFAM); mobidb-lite (MOBIDB_LITE); IPR019013 (PANTHER)	P:GO:0070072	P:vacuolar proton-transporting V-type ATPase complex assembly
HSK10115_c0_g1_i2	VMA21-like domain protein	1810	20	6.08504e-34	91.07	5	C:GO:0005789; C:GO:0012507; C:GO:0016021; C:GO:0033116; P:GO:0070072	C:endoplasmic reticulum membrane; C:ER to Golgi transport vesicle membrane; C:integral component of membrane; C:endoplasmic reticulum-Golgi intermediate compartment membrane; P:vacuolar proton-transporting V-type ATPase complex assembly			IPR019013 (PFAM); mobidb-lite (MOBIDB_LITE); IPR019013 (PANTHER)	P:GO:0070072	P:vacuolar proton-transporting V-type ATPase complex assembly
HSK10115_c0_g1_i3	VMA21-like domain protein	1098	20	2.91258e-59	93.36	5	C:GO:0005789; C:GO:0012507; C:GO:0016021; C:GO:0033116; P:GO:0070072	C:endoplasmic reticulum membrane; C:ER to Golgi transport vesicle membrane; C:integral component of membrane; C:endoplasmic reticulum-Golgi intermediate compartment membrane; P:vacuolar proton-transporting V-type ATPase complex assembly			IPR019013 (PFAM); mobidb-lite (MOBIDB_LITE); IPR019013 (PANTHER); IPR019013 (HAMAP)	P:GO:0070072	P:vacuolar proton-transporting V-type ATPase complex assembly
HSK10116_c0_g1_i1	peptidyl-prolyl cis-trans isomerase FKBP19, chloroplastic isoform X1	1060	20	1.22747e-180	90.5	2	P:GO:0000413; F:GO:0003755	P:protein peptidyl-prolyl isomerization; F:peptidyl-prolyl cis-trans isomerase activity	EC:5.2.1.8	Peptidylprolyl isomerase	IPR001179 (PFAM); G3DSA:3.10.50.40 (GENE3D); mobidb-lite (MOBIDB_LITE); PTHR10516:SF179 (PANTHER); IPR023566 (PANTHER); IPR001179 (PROSITE_PROFILES); SSF54534 (SUPERFAMILY)	no GO terms	no GO terms
HSK10116_c0_g1_i2	peptidyl-prolyl cis-trans isomerase FKBP19, chloroplastic isoform X1	682	20	5.96041e-75	81.91	2	P:GO:0000413; F:GO:0003755	P:protein peptidyl-prolyl isomerization; F:peptidyl-prolyl cis-trans isomerase activity	EC:5.2.1.8	Peptidylprolyl isomerase	mobidb-lite (MOBIDB_LITE); PTHR10516:SF179 (PANTHER); IPR023566 (PANTHER)	no GO terms	no GO terms
HSK10117_c0_g1_i1	probable serine/threonine-protein kinase At1g54610	401	20	5.15187e-15	93.06	10	F:GO:0004693; F:GO:0005524; C:GO:0005634; P:GO:0006468; F:GO:0008353; P:GO:0009069; F:GO:0030246; P:GO:0051301; P:GO:0051726; P:GO:0051726	F:cyclin-dependent protein serine/threonine kinase activity; F:ATP binding; C:nucleus; P:protein phosphorylation; F:RNA polymerase II carboxy-terminal domain kinase activity; P:serine family amino acid metabolic process; F:carbohydrate binding; P:cell division; P:regulation of cell cycle; P:regulation of cell cycle	EC:2.7.11; EC:2.7.11.23; EC:2.7.11.22	Transferring phosphorus-containing groups; [RNA-polymerase]-subunit kinase; Cyclin-dependent kinase	no IPS match	no IPS match	no IPS match
HSK10117_c0_g2_i1	Remorin family protein	491	20	1.33848e-08	67.39	3	C:GO:0005773; C:GO:0005886; C:GO:0009506	C:vacuole; C:plasma membrane; C:plasmodesma			no IPS match	no IPS match	no IPS match
HSK10118_c0_g1_i1	Acid phosphatase/vanadium-dependent haloperoxidase-related protein	1088	20	0	82.78	1	C:GO:0016020	C:membrane			IPR003832 (PFAM); mobidb-lite (MOBIDB_LITE); IPR003832 (PANTHER); PTHR31446:SF4 (PANTHER); cd01610 (CDD)	no GO terms	no GO terms
HSK10118_c0_g1_i2	Acid phosphatase/vanadium-dependent haloperoxidase-related protein	1145	20	0	82.78	1	C:GO:0016020	C:membrane			IPR003832 (PFAM); mobidb-lite (MOBIDB_LITE); IPR003832 (PANTHER); PTHR31446:SF4 (PANTHER); cd01610 (CDD)	no GO terms	no GO terms
HSK10119_c0_g1_i1	sister chromatid cohesion protein PDS5 homolog A-A isoform X2	203	9	1.36124e-40	83.31						no IPS match	no IPS match	no IPS match
HSK10120_c0_g1_i1	---NA---	271									no IPS match	no IPS match	no IPS match
HSK10120_c0_g2_i1	---NA---	218									no IPS match	no IPS match	no IPS match
HSK10121_c0_g1_i1	hypothetical protein CICLE_v10024474mg	643	20	1.28804e-58	86.9						no IPS match	no IPS match	no IPS match
HSK10121_c0_g1_i2	hypothetical protein CICLE_v10024474mg	537	20	1.8202e-57	87.05						no IPS match	no IPS match	no IPS match
HSK10122_c0_g1_i1	Mitochondrial glycoprotein family protein, putative	929	20	2.12766e-174	81.69	1	C:GO:0005759	C:mitochondrial matrix			IPR036561 (G3DSA:3.10.280.GENE3D); IPR003428 (PFAM); IPR003428 (PANTHER); PTHR10826:SF16 (PANTHER); IPR036561 (SUPERFAMILY)	C:GO:0005759	C:mitochondrial matrix
HSK10123_c0_g1_i1	peptide methionine sulfoxide reductase B5-like	873	20	3.029e-148	87.72	4	P:GO:0006979; P:GO:0030091; F:GO:0033743; P:GO:0055114	P:response to oxidative stress; P:protein repair; F:peptide-methionine (R)-S-oxide reductase activity; P:oxidation-reduction process	EC:1.8.4.12	Peptide-methionine (R)-S-oxide reductase	IPR002579 (TIGRFAM); IPR002579 (PFAM); G3DSA:2.170.150.20 (GENE3D); IPR028427 (PANTHER); PTHR10173:SF52 (PANTHER); IPR002579 (PROSITE_PROFILES); IPR011057 (SUPERFAMILY)	P:GO:0006979; F:GO:0016671; P:GO:0030091; F:GO:0033743; P:GO:0055114	P:response to oxidative stress; F:oxidoreductase activity, acting on a sulfur group of donors, disulfide as acceptor; P:protein repair; F:peptide-methionine (R)-S-oxide reductase activity; P:oxidation-reduction process
HSK10123_c0_g1_i2	peptide methionine sulfoxide reductase B5-like	833	20	3.05571e-103	84.34	9	P:GO:0006813; P:GO:0006885; P:GO:0006979; F:GO:0015299; C:GO:0016021; P:GO:0030091; F:GO:0033743; P:GO:0055114; P:GO:1902600	P:potassium ion transport; P:regulation of pH; P:response to oxidative stress; F:solute:proton antiporter activity; C:integral component of membrane; P:protein repair; F:peptide-methionine (R)-S-oxide reductase activity; P:oxidation-reduction process; P:proton transmembrane transport	EC:1.8.4.12	Peptide-methionine (R)-S-oxide reductase	G3DSA:2.170.150.20 (GENE3D); IPR002579 (PFAM); IPR028427 (PANTHER); PTHR10173:SF52 (PANTHER); IPR002579 (PROSITE_PROFILES); IPR011057 (SUPERFAMILY)	P:GO:0006979; F:GO:0016671; P:GO:0030091; F:GO:0033743; P:GO:0055114	P:response to oxidative stress; F:oxidoreductase activity, acting on a sulfur group of donors, disulfide as acceptor; P:protein repair; F:peptide-methionine (R)-S-oxide reductase activity; P:oxidation-reduction process
HSK10124_c0_g1_i1	mitochondrial amidoxime reducing component 2	586	20	5.32188e-98	91.73	3	F:GO:0003824; F:GO:0030151; F:GO:0030170	F:catalytic activity; F:molybdenum ion binding; F:pyridoxal phosphate binding			IPR005302 (PFAM); PTHR44907 (PANTHER); IPR005302 (PROSITE_PROFILES); IPR011037 (SUPERFAMILY)	F:GO:0003824; F:GO:0030151; F:GO:0030170	F:catalytic activity; F:molybdenum ion binding; F:pyridoxal phosphate binding
HSK10124_c0_g1_i2	mitochondrial amidoxime reducing component 2	1073	20	0	91.97	3	F:GO:0003824; F:GO:0030151; F:GO:0030170	F:catalytic activity; F:molybdenum ion binding; F:pyridoxal phosphate binding			IPR005303 (PFAM); IPR005302 (PFAM); PTHR44907 (PANTHER); IPR005302 (PROSITE_PROFILES); IPR011037 (SUPERFAMILY); SSF141673 (SUPERFAMILY)	F:GO:0003824; F:GO:0030151; F:GO:0030170	F:catalytic activity; F:molybdenum ion binding; F:pyridoxal phosphate binding
HSK10125_c0_g1_i1	transcription repressor OFP13-like	823	20	1.11325e-110	70.37						IPR006458 (TIGRFAM); IPR006458 (PFAM); mobidb-lite (MOBIDB_LITE); PTHR33057:SF26 (PANTHER); PTHR33057 (PANTHER); IPR006458 (PROSITE_PROFILES)	no GO terms	no GO terms
HSK10126_c0_g1_i1	senescence-associated protein	270	20	1.51445e-28	78.54	2	C:GO:0016020; C:GO:0016021	C:membrane; C:integral component of membrane			mobidb-lite (MOBIDB_LITE); PTHR33047 (PANTHER)	no GO terms	no GO terms
HSK10127_c0_g1_i1	RNA polymerase II transcriptional coactivator KIWI-like	460	20	6.29394e-29	85.47	4	F:GO:0003677; F:GO:0003713; C:GO:0005667; P:GO:0045893	F:DNA binding; F:transcription coactivator activity; C:transcription factor complex; P:positive regulation of transcription, DNA-templated			mobidb-lite (MOBIDB_LITE)	no GO terms	no GO terms
HSK10127_c0_g1_i2	RNA polymerase II transcriptional coactivator KIWI	777	20	2.28733e-61	86.32	7	F:GO:0003677; F:GO:0003713; F:GO:0005515; C:GO:0005634; C:GO:0005667; P:GO:0045893; P:GO:0060261	F:DNA binding; F:transcription coactivator activity; F:protein binding; C:nucleus; C:transcription factor complex; P:positive regulation of transcription, DNA-templated; P:positive regulation of transcription initiation from RNA polymerase II promoter			IPR009044 (G3DSA:2.30.31.GENE3D); IPR003173 (PFAM); mobidb-lite (MOBIDB_LITE); PTHR13215 (PANTHER); IPR009044 (SUPERFAMILY)	F:GO:0003677; F:GO:0003713; P:GO:0006355	F:DNA binding; F:transcription coactivator activity; P:regulation of transcription, DNA-templated
HSK10128_c0_g1_i1	17.3 kDa class I heat shock protein-like	611	20	5.14673e-114	75.58	3	C:GO:0005737; C:GO:0016020; C:GO:0016021	C:cytoplasm; C:membrane; C:integral component of membrane			IPR002068 (PFAM); IPR008978 (G3DSA:2.60.40.GENE3D); IPR031107 (PANTHER); PTHR11527:SF190 (PANTHER); IPR002068 (PROSITE_PROFILES); cd06472 (CDD); IPR008978 (SUPERFAMILY)	no GO terms	no GO terms
HSK10129_c0_g1_i1	disease resistance protein At4g27190-like	267	20	2.27385e-45	87.52	1	F:GO:0043531	F:ADP binding			no IPS match	no IPS match	no IPS match
HSK10129_c0_g1_i2	probable disease resistance protein At4g27220	267	20	2.73197e-52	90.39	1	F:GO:0043531	F:ADP binding			no IPS match	no IPS match	no IPS match
HSK10129_c0_g1_i3	disease resistance protein At4g27190-like	277	20	3.49759e-56	89.29	1	F:GO:0043531	F:ADP binding			no IPS match	no IPS match	no IPS match
HSK1013_c0_g1_i1	---NA---	417									no IPS match	no IPS match	no IPS match
HSK10130_c0_g1_i1	Chaperone DnaJ	684	20	6.40463e-88	87.31	1	C:GO:0016021	C:integral component of membrane			PTHR37230 (PANTHER)	no GO terms	no GO terms
HSK10131_c0_g1_i1	---NA---	837									no IPS match	no IPS match	no IPS match
HSK10131_c0_g2_i1	---NA---	513									no IPS match	no IPS match	no IPS match
HSK10132_c0_g1_i1	hypothetical protein CICLE_v10010525mg, partial	226	2	8.83455e-13	94.79						no IPS match	no IPS match	no IPS match
HSK10133_c0_g1_i1	TMV resistance protein N-like isoform X1	579	20	1.35054e-115	91.48	3	F:GO:0005515; P:GO:0007165; C:GO:0016021	F:protein binding; P:signal transduction; C:integral component of membrane			IPR000157 (PFAM); IPR035897 (G3DSA:3.40.50.GENE3D); PTHR11017 (PANTHER); IPR000157 (PROSITE_PROFILES); IPR035897 (SUPERFAMILY)	F:GO:0005515; P:GO:0007165	F:protein binding; P:signal transduction
HSK10134_c0_g1_i1	---NA---	293									no IPS match	no IPS match	no IPS match
HSK10134_c0_g2_i1	PREDICTED: uncharacterized protein LOC102614714	641	20	9.98943e-81	62.11						mobidb-lite (MOBIDB_LITE); PTHR33743 (PANTHER); PTHR33743:SF5 (PANTHER)	no GO terms	no GO terms
HSK10134_c0_g2_i2	PREDICTED: uncharacterized protein LOC102614714	322	20	4.72941e-38	71.98						no IPS match	no IPS match	no IPS match
HSK10135_c0_g1_i1	flocculation protein FLO11-like isoform X2	1016	9	0	88.68						mobidb-lite (MOBIDB_LITE); mobidb-lite (MOBIDB_LITE)	no GO terms	no GO terms
HSK10136_c0_g1_i1	non-functional NADPH-dependent codeinone reductase 2-like	1134	20	0	87.8	3	F:GO:0016491; F:GO:0033808; P:GO:0055114	F:oxidoreductase activity; F:6'-deoxychalcone synthase activity; P:oxidation-reduction process	EC:2.3.1.170	6'-deoxychalcone synthase	IPR020471 (PRINTS); IPR020471 (PIRSF); IPR036812 (G3DSA:3.20.20.GENE3D); IPR023210 (PFAM); IPR020471 (PANTHER); PTHR11732:SF382 (PANTHER); IPR023210 (CDD); IPR036812 (SUPERFAMILY)	F:GO:0016491; P:GO:0055114	F:oxidoreductase activity; P:oxidation-reduction process
HSK10137_c0_g1_i1	eukaryotic translation initiation factor 1A	569	20	2.03591e-82	98.94	4	F:GO:0003743; C:GO:0005840; P:GO:0006446; C:GO:0016021	F:translation initiation factor activity; C:ribosome; P:regulation of translational initiation; C:integral component of membrane			no IPS match	no IPS match	no IPS match
HSK10138_c0_g1_i1	pyrophosphate--fructose 6-phosphate 1-phosphotransferase subunit beta	2022	20	0	90.23	13	F:GO:0003872; F:GO:0005524; C:GO:0005945; P:GO:0006000; P:GO:0006002; P:GO:0006012; P:GO:0006013; P:GO:0006094; P:GO:0006098; P:GO:0046835; F:GO:0046872; F:GO:0047334; P:GO:0061615	F:6-phosphofructokinase activity; F:ATP binding; C:6-phosphofructokinase complex; P:fructose metabolic process; P:fructose 6-phosphate metabolic process; P:galactose metabolic process; P:mannose metabolic process; P:gluconeogenesis; P:pentose-phosphate shunt; P:carbohydrate phosphorylation; F:metal ion binding; F:diphosphate-fructose-6-phosphate 1-phosphotransferase activity; P:glycolytic process…	EC:2.7.1.90; EC:2.7.1.11	Diphosphate--fructose-6-phosphate 1-phosphotransferase; 6-phosphofructokinase	IPR022953 (PRINTS); IPR011183 (PIRSF); G3DSA:3.40.50.460 (GENE3D); G3DSA:1.10.10.480 (GENE3D); IPR000023 (PFAM); G3DSA:3.40.50.450 (GENE3D); IPR011183 (TIGRFAM); PTHR43650:SF6 (PANTHER); PTHR43650 (PANTHER); IPR011183 (HAMAP); IPR035966 (SUPERFAMILY)	F:GO:0003872; F:GO:0005524; P:GO:0006002; P:GO:0006096; F:GO:0047334	F:6-phosphofructokinase activity; F:ATP binding; P:fructose 6-phosphate metabolic process; P:glycolytic process; F:diphosphate-fructose-6-phosphate 1-phosphotransferase activity
HSK10139_c0_g1_i1	two-component response regulator ARR5-like	423	20	3.55115e-32	90.43	3	P:GO:0000160; C:GO:0005622; C:GO:0016021	P:phosphorelay signal transduction system; C:intracellular; C:integral component of membrane			mobidb-lite (MOBIDB_LITE)	no GO terms	no GO terms
HSK1014_c0_g1_i1	---NA---	424									no IPS match	no IPS match	no IPS match
HSK10140_c0_g1_i1	LRR receptor-like serine/threonine-protein kinase RCH1	467	20	1.09959e-80	91.98	6	F:GO:0004674; F:GO:0005515; F:GO:0005524; P:GO:0006468; P:GO:0009069; C:GO:0016021	F:protein serine/threonine kinase activity; F:protein binding; F:ATP binding; P:protein phosphorylation; P:serine family amino acid metabolic process; C:integral component of membrane	EC:2.7.11	Transferring phosphorus-containing groups	IPR032675 (G3DSA:3.80.10.GENE3D); IPR001611 (PFAM); PTHR27000:SF302 (PANTHER); PTHR27000 (PANTHER); SSF52058 (SUPERFAMILY)	F:GO:0005515	F:protein binding
HSK10140_c0_g2_i1	LRR receptor-like serine/threonine-protein kinase RCH1	751	20	6.26252e-163	95.52	7	F:GO:0004674; F:GO:0005524; P:GO:0006468; P:GO:0009069; C:GO:0016021; F:GO:0032440; P:GO:0055114	F:protein serine/threonine kinase activity; F:ATP binding; P:protein phosphorylation; P:serine family amino acid metabolic process; C:integral component of membrane; F:2-alkenal reductase [NAD(P)] activity; P:oxidation-reduction process	EC:2.7.11; EC:1.3.1.74	Transferring phosphorus-containing groups; 2-alkenal reductase (NAD(P)(+))	PIRSF000654 (PIRSF); G3DSA:1.10.510.10 (GENE3D); IPR000719 (PFAM); PTHR27000 (PANTHER); PTHR27000:SF302 (PANTHER); IPR000719 (PROSITE_PROFILES); IPR011009 (SUPERFAMILY)	F:GO:0004672; F:GO:0005524; P:GO:0006468	F:protein kinase activity; F:ATP binding; P:protein phosphorylation
HSK10140_c0_g3_i1	LRR receptor-like serine/threonine-protein kinase RCH1	207	20	3.96424e-33	94.31	5	F:GO:0004674; F:GO:0005524; P:GO:0006468; P:GO:0009069; C:GO:0016021	F:protein serine/threonine kinase activity; F:ATP binding; P:protein phosphorylation; P:serine family amino acid metabolic process; C:integral component of membrane	EC:2.7.11	Transferring phosphorus-containing groups	G3DSA:3.30.200.20 (GENE3D); PTHR27000 (PANTHER); PTHR27000:SF302 (PANTHER)	no GO terms	no GO terms
HSK10141_c0_g1_i1	protein SIEVE ELEMENT OCCLUSION B-like	479	20	3.96457e-106	87.92						IPR027942 (PFAM); PTHR33232:SF9 (PANTHER); PTHR33232 (PANTHER)	no GO terms	no GO terms
HSK10141_c0_g1_i2	protein SIEVE ELEMENT OCCLUSION B-like	1025	20	0	89.78						IPR027942 (PFAM); PTHR33232 (PANTHER); PTHR33232:SF9 (PANTHER)	no GO terms	no GO terms
HSK10142_c0_g1_i1	poly(A)-specific ribonuclease PARN	973	20	2.40499e-157	86.1	4	F:GO:0003723; P:GO:0006355; F:GO:0008168; P:GO:0032259	F:RNA binding; P:regulation of transcription, DNA-templated; F:methyltransferase activity; P:methylation			mobidb-lite (MOBIDB_LITE); PTHR15092:SF22 (PANTHER); PTHR15092 (PANTHER)	no GO terms	no GO terms
HSK10142_c0_g2_i1	poly(A)-specific ribonuclease PARN-like isoform X2	519	20	7.44356e-120	93.22	4	F:GO:0003723; P:GO:0006355; F:GO:0008168; P:GO:0032259	F:RNA binding; P:regulation of transcription, DNA-templated; F:methyltransferase activity; P:methylation			IPR006941 (PFAM); IPR036397 (G3DSA:3.30.420.GENE3D); PTHR15092 (PANTHER); PTHR15092:SF22 (PANTHER); IPR012337 (SUPERFAMILY)	F:GO:0003676	F:nucleic acid binding
HSK10143_c0_g1_i1	protein dimerization, putative	471	20	1.70508e-104	86.2	1	F:GO:0046983	F:protein dimerization activity			IPR007021 (PFAM); PTHR32166 (PANTHER)	no GO terms	no GO terms
HSK10143_c0_g2_i1	protein dimerization, putative	413	20	2.71938e-74	91.12	1	F:GO:0046983	F:protein dimerization activity			no IPS match	no IPS match	no IPS match
HSK10144_c0_g1_i1	hypothetical protein CUMW_115640	506	1	2.25135e-08	100						no IPS match	no IPS match	no IPS match
HSK10145_c0_g1_i1	mediator of RNA polymerase II transcription subunit 20a isoform X1	1312	20	3.1014e-163	92.6	6	F:GO:0001104; F:GO:0003713; C:GO:0005667; P:GO:0006357; C:GO:0016592; P:GO:0045893	F:RNA polymerase II transcription cofactor activity; F:transcription coactivator activity; C:transcription factor complex; P:regulation of transcription by RNA polymerase II; C:mediator complex; P:positive regulation of transcription, DNA-templated			IPR013921 (PFAM); PTHR12465 (PANTHER)	F:GO:0001104; P:GO:0006357; C:GO:0016592	F:RNA polymerase II transcription cofactor activity; P:regulation of transcription by RNA polymerase II; C:mediator complex
HSK10146_c0_g1_i1	pentatricopeptide repeat-containing protein At4g21065-like	823	20	3.62033e-166	93.44	7	F:GO:0003723; F:GO:0004519; F:GO:0005515; F:GO:0008270; P:GO:0009451; C:GO:0043231; P:GO:0090305	F:RNA binding; F:endonuclease activity; F:protein binding; F:zinc ion binding; P:RNA modification; C:intracellular membrane-bounded organelle; P:nucleic acid phosphodiester bond hydrolysis			IPR011990 (G3DSA:1.25.40.GENE3D); IPR002885 (PFAM); IPR032867 (PFAM); PTHR44853 (PANTHER)	F:GO:0005515; F:GO:0008270	F:protein binding; F:zinc ion binding
HSK10147_c0_g1_i1	leucine-rich repeat-containing G-protein coupled receptor 4-like	1166	20	3.60018e-55	69.18						IPR032675 (G3DSA:3.80.10.GENE3D); PTHR44306:SF1 (PANTHER); PTHR44306 (PANTHER); SSF52047 (SUPERFAMILY)	no GO terms	no GO terms
HSK10148_c0_g1_i1	---NA---	349									mobidb-lite (MOBIDB_LITE)	no GO terms	no GO terms
HSK10149_c0_g1_i1	disease resistance protein At4g27190-like isoform X2	916	20	1.59162e-99	82.04	1	F:GO:0043531	F:ADP binding			PTHR33463 (PANTHER); PTHR33463:SF6 (PANTHER); SSF52047 (SUPERFAMILY)	no GO terms	no GO terms
HSK10149_c0_g1_i2	probable disease resistance protein At1g61190 isoform X4	483	20	7.95325e-26	85.9	1	F:GO:0043531	F:ADP binding			no IPS match	no IPS match	no IPS match
HSK10150_c0_g1_i1	BAG family molecular chaperone regulator 2	1171	20	5.32009e-95	69.12						PTHR10666 (PANTHER); PTHR10666:SF91 (PANTHER)	no GO terms	no GO terms
HSK10150_c0_g1_i2	BAG family molecular chaperone regulator 2	1060	20	2.48376e-102	83.97	1	F:GO:0005515	F:protein binding			IPR000626 (PFAM); G3DSA:3.10.20.90 (GENE3D); PTHR10666:SF91 (PANTHER); PTHR10666 (PANTHER); IPR000626 (PROSITE_PROFILES); cd01812 (CDD); IPR029071 (SUPERFAMILY)	F:GO:0005515	F:protein binding
HSK10151_c0_g1_i1	Alpha/beta-Hydrolases superfamily protein	1020	20	0	88.64	1	F:GO:0016788	F:hydrolase activity, acting on ester bonds			IPR012908 (PFAM); PTHR15495 (PANTHER); IPR029058 (SUPERFAMILY)	F:GO:0016788	F:hydrolase activity, acting on ester bonds
HSK10152_c0_g1_i1	probable inactive ATP-dependent zinc metalloprotease FTSHI 4, chloroplastic	3134	20	0	93.52	3	F:GO:0004222; F:GO:0005524; P:GO:0006508	F:metalloendopeptidase activity; F:ATP binding; P:proteolysis	EC:3.4.24	Acting on peptide bonds (peptidases)	IPR003959 (PFAM); G3DSA:1.20.58.760 (GENE3D); G3DSA:3.40.50.300 (GENE3D); G3DSA:1.10.8.60 (GENE3D); PTHR23076 (PANTHER); PTHR23076:SF49 (PANTHER); cd00009 (CDD); IPR027417 (SUPERFAMILY); IPR037219 (SUPERFAMILY)	F:GO:0004222; F:GO:0005524; P:GO:0006508	F:metalloendopeptidase activity; F:ATP binding; P:proteolysis
HSK10153_c0_g1_i1	hypothetical protein CUMW_180320	756	20	1.09548e-108	65.65	2	P:GO:0009642; C:GO:0016021	P:response to light intensity; C:integral component of membrane			mobidb-lite (MOBIDB_LITE); PTHR33401:SF5 (PANTHER); IPR037492 (PANTHER)	P:GO:0009642	P:response to light intensity
HSK10154_c0_g1_i1	auxin-responsive protein IAA13-like	960	20	7.51124e-135	82.73	4	F:GO:0005515; C:GO:0005634; P:GO:0006355; P:GO:0009734	F:protein binding; C:nucleus; P:regulation of transcription, DNA-templated; P:auxin-activated signaling pathway			IPR033389 (PFAM); G3DSA:3.10.20.90 (GENE3D); mobidb-lite (MOBIDB_LITE); mobidb-lite (MOBIDB_LITE); IPR003311 (PANTHER); PTHR31734:SF6 (PANTHER); IPR000270 (PROSITE_PROFILES); SSF54277 (SUPERFAMILY)	F:GO:0005515; C:GO:0005634; P:GO:0006355	F:protein binding; C:nucleus; P:regulation of transcription, DNA-templated
HSK10155_c0_g1_i1	stress protein DDR48-like	682	2	5.27644e-109	99.77						mobidb-lite (MOBIDB_LITE)	no GO terms	no GO terms
HSK10155_c0_g1_i2	stress protein DDR48-like	755	2	2.65855e-112	99.77						mobidb-lite (MOBIDB_LITE)	no GO terms	no GO terms
HSK10155_c0_g1_i3	proline-rich protein 3-like	1546	20	0	58.45	2	C:GO:0016020; C:GO:0016021	C:membrane; C:integral component of membrane			PF01190 (PFAM); mobidb-lite (MOBIDB_LITE); PTHR33470:SF15 (PANTHER); PTHR33470 (PANTHER); PTHR33470 (PANTHER); PTHR33470:SF15 (PANTHER); PTHR33470 (PANTHER); PTHR33470:SF15 (PANTHER)	no GO terms	no GO terms
HSK10155_c0_g1_i4	proline-rich protein 3-like	1619	20	0	58.7	2	C:GO:0016020; C:GO:0016021	C:membrane; C:integral component of membrane			PF01190 (PFAM); mobidb-lite (MOBIDB_LITE); PTHR33470:SF1 (PANTHER); PTHR33470 (PANTHER); PTHR33470 (PANTHER); PTHR33470:SF1 (PANTHER); PTHR33470 (PANTHER)	no GO terms	no GO terms
HSK10156_c0_g1_i1	dehydrodolichyl diphosphate synthase 2	746	20	1.37749e-82	88.88	3	F:GO:0002094; C:GO:0009570; P:GO:0009668	F:polyprenyltransferase activity; C:chloroplast stroma; P:plastid membrane organization			IPR001441 (PFAM); IPR001441 (TIGRFAM); IPR036424 (G3DSA:3.40.1180.GENE3D); PTHR10291:SF0 (PANTHER); IPR001441 (PANTHER); IPR036424 (SUPERFAMILY)	F:GO:0016765	F:transferase activity, transferring alkyl or aryl (other than methyl) groups
HSK10157_c0_g1_i1	DDT domain-containing protein DDR4	693	20	1.30995e-82	63.58	2	C:GO:0016020; C:GO:0016021	C:membrane; C:integral component of membrane			mobidb-lite (MOBIDB_LITE); mobidb-lite (MOBIDB_LITE)	no GO terms	no GO terms
HSK10157_c0_g1_i2	DDT domain-containing protein DDR4	936	20	7.69278e-152	68.89	2	C:GO:0016020; C:GO:0016021	C:membrane; C:integral component of membrane			mobidb-lite (MOBIDB_LITE); mobidb-lite (MOBIDB_LITE); PTHR14296 (PANTHER); PTHR14296 (PANTHER); PTHR14296:SF6 (PANTHER); PTHR14296 (PANTHER); PTHR14296:SF6 (PANTHER); PTHR14296:SF6 (PANTHER)	no GO terms	no GO terms
HSK10158_c0_g1_i1	cellulose synthase A catalytic subunit 8 [UDP-forming]	1196	20	0	94.93	10	C:GO:0005886; P:GO:0005982; P:GO:0005985; P:GO:0006011; P:GO:0009834; C:GO:0016021; F:GO:0016760; P:GO:0030244; F:GO:0046872; P:GO:0071555	C:plasma membrane; P:starch metabolic process; P:sucrose metabolic process; P:UDP-glucose metabolic process; P:plant-type secondary cell wall biogenesis; C:integral component of membrane; F:cellulose synthase (UDP-forming) activity; P:cellulose biosynthetic process; F:metal ion binding; P:cell wall organization	EC:2.4.1.12	Cellulose synthase (UDP-forming)	IPR029044 (G3DSA:3.90.550.GENE3D); IPR005150 (PFAM); PTHR13301:SF31 (PANTHER); PTHR13301 (PANTHER); IPR029044 (SUPERFAMILY)	C:GO:0016020; F:GO:0016760; P:GO:0030244	C:membrane; F:cellulose synthase (UDP-forming) activity; P:cellulose biosynthetic process
HSK10158_c0_g2_i1	cellulose synthase	350	20	5.64067e-77	99.05	19	F:GO:0000977; F:GO:0005515; C:GO:0005618; C:GO:0005794; C:GO:0005886; P:GO:0005982; P:GO:0005985; P:GO:0006011; P:GO:0006970; P:GO:0009414; P:GO:0009833; P:GO:0009834; C:GO:0016021; F:GO:0016760; P:GO:0030244; P:GO:0042742; F:GO:0046872; P:GO:0050832; P:GO:0052386	F:RNA polymerase II regulatory region sequence-specific DNA binding; F:protein binding; C:cell wall; C:Golgi apparatus; C:plasma membrane; P:starch metabolic process; P:sucrose metabolic process; P:UDP-glucose metabolic process; P:response to osmotic stress; P:response to water deprivation; P:plant-type primary cell wall biogenesis; P:plant-type secondary cell wall biogenesis; C:integral componen…	EC:2.4.1.12	Cellulose synthase (UDP-forming)	IPR005150 (PFAM); PTHR13301:SF31 (PANTHER); PTHR13301 (PANTHER)	C:GO:0016020; F:GO:0016760; P:GO:0030244	C:membrane; F:cellulose synthase (UDP-forming) activity; P:cellulose biosynthetic process
HSK10158_c0_g3_i1	cellulose synthase A catalytic subunit 8 [UDP-forming]	516	20	7.14475e-96	99.96	10	C:GO:0005886; P:GO:0005982; P:GO:0005985; P:GO:0006011; P:GO:0009834; C:GO:0016021; F:GO:0016760; P:GO:0030244; F:GO:0046872; P:GO:0071555	C:plasma membrane; P:starch metabolic process; P:sucrose metabolic process; P:UDP-glucose metabolic process; P:plant-type secondary cell wall biogenesis; C:integral component of membrane; F:cellulose synthase (UDP-forming) activity; P:cellulose biosynthetic process; F:metal ion binding; P:cell wall organization	EC:2.4.1.12	Cellulose synthase (UDP-forming)	IPR005150 (PFAM); PTHR13301 (PANTHER); PTHR13301:SF31 (PANTHER)	C:GO:0016020; F:GO:0016760; P:GO:0030244	C:membrane; F:cellulose synthase (UDP-forming) activity; P:cellulose biosynthetic process
HSK10159_c0_g1_i1	EH domain-containing protein 1	1125	20	0	96.73	2	F:GO:0005509; F:GO:0005525	F:calcium ion binding; F:GTP binding			G3DSA:3.40.50.300 (GENE3D); IPR022812 (PFAM); G3DSA:1.10.268.20 (GENE3D); PTHR11216:SF76 (PANTHER); PTHR11216 (PANTHER); IPR030381 (PROSITE_PROFILES); cd09913 (CDD); IPR027417 (SUPERFAMILY)	F:GO:0005525	F:GTP binding
HSK10160_c0_g1_i1	TMV resistance protein N-like	351	20	2.30384e-74	96.03	1	F:GO:0043531	F:ADP binding			PTHR11017 (PANTHER)	no GO terms	no GO terms
HSK10160_c0_g2_i1	TMV resistance protein N-like	217	20	1.15878e-42	95.49	1	F:GO:0043531	F:ADP binding			IPR032675 (G3DSA:3.80.10.GENE3D); PTHR11017:SF199 (PANTHER); PTHR11017 (PANTHER); SSF52058 (SUPERFAMILY)	no GO terms	no GO terms
HSK10160_c0_g3_i1	TMV resistance protein N-like	657	20	5.13663e-148	85.74	2	P:GO:0007165; F:GO:0043531	P:signal transduction; F:ADP binding			IPR032675 (G3DSA:3.80.10.GENE3D); PTHR11017 (PANTHER); PTHR11017:SF197 (PANTHER); SSF52058 (SUPERFAMILY)	no GO terms	no GO terms
HSK10161_c0_g1_i1	---NA---	425									no IPS match	no IPS match	no IPS match
HSK10161_c0_g2_i1	ER membrane protein complex subunit 3	430	20	3.722e-56	96.59	1	C:GO:0016021	C:integral component of membrane			IPR002809 (PFAM); PTHR13116:SF5 (PANTHER); IPR008568 (PANTHER)	C:GO:0016020	C:membrane
HSK10161_c0_g2_i2	ER membrane protein complex subunit 3	1132	20	0	97.06	2	P:GO:0034975; C:GO:0072546	P:protein folding in endoplasmic reticulum; C:ER membrane protein complex			IPR002809 (PFAM); IPR008568 (PIRSF); IPR008568 (PANTHER); PTHR13116:SF5 (PANTHER)	C:GO:0016020	C:membrane
HSK10162_c0_g1_i1	transcription factor MYB59 isoform X1	1047	20	1.73404e-147	83.54	7	F:GO:0000981; F:GO:0001135; C:GO:0005634; P:GO:0006357; P:GO:0030154; F:GO:0043565; F:GO:0044212	F:RNA polymerase II transcription factor activity, sequence-specific DNA binding; F:transcription factor activity, RNA polymerase II transcription factor recruiting; C:nucleus; P:regulation of transcription by RNA polymerase II; P:cell differentiation; F:sequence-specific DNA binding; F:transcription regulatory region DNA binding			G3DSA:1.10.10.60 (GENE3D); IPR001005 (PFAM); G3DSA:1.10.10.60 (GENE3D); mobidb-lite (MOBIDB_LITE); PTHR10641 (PANTHER); PTHR10641:SF484 (PANTHER); IPR017877 (PROSITE_PROFILES); IPR017930 (PROSITE_PROFILES); IPR001005 (CDD); IPR009057 (SUPERFAMILY)	F:GO:0003677	F:DNA binding
HSK10163_c0_g1_i1	myosin-16 isoform X1	2724	20	0	80.55	9	F:GO:0003676; F:GO:0003777; F:GO:0003779; F:GO:0005524; C:GO:0005874; P:GO:0007018; F:GO:0008017; C:GO:0016459; C:GO:0045298	F:nucleic acid binding; F:microtubule motor activity; F:actin binding; F:ATP binding; C:microtubule; P:microtubule-based movement; F:microtubule binding; C:myosin complex; C:tubulin complex	EC:3.6.1.15	Nucleoside-triphosphate phosphatase	IPR001609 (PRINTS); IPR036961 (G3DSA:3.40.850.GENE3D); G3DSA:3.30.70.3240 (GENE3D); IPR001609 (PFAM); G3DSA:1.20.5.190 (GENE3D); G3DSA:1.20.58.530 (GENE3D); G3DSA:1.20.120.720 (GENE3D); IPR000048 (PFAM); mobidb-lite (MOBIDB_LITE); PTHR13140:SF652 (PANTHER); PTHR13140 (PANTHER); IPR001609 (PROSITE_PROFILES); IPR000048 (PROSITE_PROFILES); IPR000048 (PROSITE_PROFILES); IPR000048 (PROSITE_PROFILES); …	F:GO:0003774; F:GO:0003777; F:GO:0005515; F:GO:0005524; P:GO:0007018; F:GO:0008017; C:GO:0016459	F:motor activity; F:microtubule motor activity; F:protein binding; F:ATP binding; P:microtubule-based movement; F:microtubule binding; C:myosin complex
HSK10164_c0_g1_i1	PREDICTED: uncharacterized protein LOC102629039	265	1	1.66914e-05	80						no IPS match	no IPS match	no IPS match
HSK10164_c0_g2_i1	---NA---	229									no IPS match	no IPS match	no IPS match
HSK10164_c0_g3_i1	---NA---	431									no IPS match	no IPS match	no IPS match
HSK10165_c0_g1_i1	uncharacterized CRM domain-containing protein At3g25440, chloroplastic	1041	20	0	73.36	1	F:GO:0003723	F:RNA binding			mobidb-lite (MOBIDB_LITE); PTHR31426 (PANTHER); PTHR31426:SF4 (PANTHER)	no GO terms	no GO terms
HSK10166_c0_g1_i1	ribulose bisphosphate carboxylase small chain clone 512-like	1074	20	4.14128e-124	91.85	8	F:GO:0004497; C:GO:0009573; P:GO:0009853; P:GO:0015977; P:GO:0015979; F:GO:0016984; P:GO:0046487; P:GO:0055114	F:monooxygenase activity; C:chloroplast ribulose bisphosphate carboxylase complex; P:photorespiration; P:carbon fixation; P:photosynthesis; F:ribulose-bisphosphate carboxylase activity; P:glyoxylate metabolic process; P:oxidation-reduction process	EC:4.1.1.39	Ribulose-bisphosphate carboxylase	IPR024681 (PRINTS); IPR036385 (G3DSA:3.30.190.GENE3D); IPR000894 (PFAM); PTHR31262:SF7 (PANTHER); PTHR31262 (PANTHER); cd03527 (CDD); IPR036385 (SUPERFAMILY)	no GO terms	no GO terms
HSK10166_c0_g1_i2	ribulose bisphosphate carboxylase small chain clone 512-like	845	20	2.95387e-144	91.37	8	F:GO:0004497; C:GO:0009573; P:GO:0009853; P:GO:0015977; P:GO:0015979; F:GO:0016984; P:GO:0046487; P:GO:0055114	F:monooxygenase activity; C:chloroplast ribulose bisphosphate carboxylase complex; P:photorespiration; P:carbon fixation; P:photosynthesis; F:ribulose-bisphosphate carboxylase activity; P:glyoxylate metabolic process; P:oxidation-reduction process	EC:4.1.1.39	Ribulose-bisphosphate carboxylase	IPR000894 (PFAM); IPR036385 (G3DSA:3.30.190.GENE3D); PTHR31262:SF7 (PANTHER); PTHR31262 (PANTHER); cd03527 (CDD); IPR036385 (SUPERFAMILY)	no GO terms	no GO terms
HSK10166_c0_g1_i3	ribulose bisphosphate carboxylase small chain clone 512-like	1085	20	4.61815e-124	91.85	8	F:GO:0004497; C:GO:0009573; P:GO:0009853; P:GO:0015977; P:GO:0015979; F:GO:0016984; P:GO:0046487; P:GO:0055114	F:monooxygenase activity; C:chloroplast ribulose bisphosphate carboxylase complex; P:photorespiration; P:carbon fixation; P:photosynthesis; F:ribulose-bisphosphate carboxylase activity; P:glyoxylate metabolic process; P:oxidation-reduction process	EC:4.1.1.39	Ribulose-bisphosphate carboxylase	IPR024681 (PRINTS); IPR036385 (G3DSA:3.30.190.GENE3D); IPR000894 (PFAM); PTHR31262:SF7 (PANTHER); PTHR31262 (PANTHER); cd03527 (CDD); IPR036385 (SUPERFAMILY)	no GO terms	no GO terms
HSK10167_c0_g1_i1	nardilysin-like isoform X1	3384	20	0	89.44	3	F:GO:0004222; P:GO:0006508; F:GO:0046872	F:metalloendopeptidase activity; P:proteolysis; F:metal ion binding	EC:3.4.24	Acting on peptide bonds (peptidases)	G3DSA:3.30.830.10 (GENE3D); IPR032632 (PFAM); G3DSA:3.30.830.10 (GENE3D); IPR007863 (PFAM); G3DSA:3.30.830.10 (GENE3D); IPR011765 (PFAM); mobidb-lite (MOBIDB_LITE); PTHR43690 (PANTHER); PTHR43690:SF1 (PANTHER); IPR011249 (SUPERFAMILY); IPR011249 (SUPERFAMILY); IPR011249 (SUPERFAMILY); IPR011249 (SUPERFAMILY)	F:GO:0003824; F:GO:0046872	F:catalytic activity; F:metal ion binding
HSK10167_c0_g1_i2	nardilysin-like isoform X1	3395	20	0	88.26	3	F:GO:0004222; P:GO:0006508; F:GO:0046872	F:metalloendopeptidase activity; P:proteolysis; F:metal ion binding	EC:3.4.24	Acting on peptide bonds (peptidases)	IPR011765 (PFAM); G3DSA:3.30.830.10 (GENE3D); IPR032632 (PFAM); IPR007863 (PFAM); G3DSA:3.30.830.10 (GENE3D); mobidb-lite (MOBIDB_LITE); PTHR43690 (PANTHER); PTHR43690:SF1 (PANTHER); IPR011249 (SUPERFAMILY); IPR011249 (SUPERFAMILY); IPR011249 (SUPERFAMILY)	F:GO:0003824; F:GO:0046872	F:catalytic activity; F:metal ion binding
HSK10168_c0_g1_i1	rho GTPase-activating protein REN1 isoform X1	1413	20	0	81.42	5	F:GO:0005096; P:GO:0007165; P:GO:0043547; C:GO:0044464; P:GO:0048868	F:GTPase activator activity; P:signal transduction; P:positive regulation of GTPase activity; C:cell part; P:pollen tube development			IPR025757 (PFAM); mobidb-lite (MOBIDB_LITE); mobidb-lite (MOBIDB_LITE); mobidb-lite (MOBIDB_LITE); mobidb-lite (MOBIDB_LITE); mobidb-lite (MOBIDB_LITE); PTHR23176:SF42 (PANTHER); PTHR23176:SF42 (PANTHER); PTHR23176 (PANTHER); PTHR23176 (PANTHER)	no GO terms	no GO terms
HSK10168_c0_g1_i2	rho GTPase-activating protein REN1 isoform X1	1401	20	0	81.73	5	F:GO:0005096; P:GO:0007165; P:GO:0043547; C:GO:0044464; P:GO:0048868	F:GTPase activator activity; P:signal transduction; P:positive regulation of GTPase activity; C:cell part; P:pollen tube development			IPR025757 (PFAM); mobidb-lite (MOBIDB_LITE); mobidb-lite (MOBIDB_LITE); mobidb-lite (MOBIDB_LITE); mobidb-lite (MOBIDB_LITE); PTHR23176 (PANTHER); PTHR23176:SF42 (PANTHER); PTHR23176 (PANTHER); PTHR23176:SF42 (PANTHER)	no GO terms	no GO terms
HSK10169_c0_g1_i1	---NA---	439									no IPS match	no IPS match	no IPS match
HSK10169_c0_g1_i2	---NA---	303									no IPS match	no IPS match	no IPS match
HSK10170_c0_g1_i1	protein IQ-DOMAIN 1	634	20	4.01134e-54	84.71	2	F:GO:0005515; C:GO:0005634	F:protein binding; C:nucleus			PTHR32295 (PANTHER); PTHR32295:SF25 (PANTHER); IPR000048 (PROSITE_PROFILES)	F:GO:0005515	F:protein binding
HSK10170_c0_g1_i2	protein IQ-DOMAIN 1	1645	20	0	88.45	2	F:GO:0005515; C:GO:0005634	F:protein binding; C:nucleus			IPR025064 (PFAM); IPR000048 (PFAM); G3DSA:1.20.5.190 (GENE3D); mobidb-lite (MOBIDB_LITE); mobidb-lite (MOBIDB_LITE); PTHR32295 (PANTHER); PTHR32295:SF86 (PANTHER); IPR000048 (PROSITE_PROFILES); IPR000048 (PROSITE_PROFILES)	F:GO:0005515	F:protein binding
HSK10171_c0_g1_i1	PREDICTED: uncharacterized protein LOC102628675	416	20	1.96167e-59	71.39						PTHR31865 (PANTHER); PTHR31865:SF7 (PANTHER)	no GO terms	no GO terms
HSK10171_c0_g1_i2	PREDICTED: uncharacterized protein LOC102628675	807	20	1.17138e-155	70.83						IPR012881 (PFAM); PTHR31865 (PANTHER); PTHR31865:SF7 (PANTHER)	no GO terms	no GO terms
HSK10172_c0_g1_i1	Tetratricopeptide repeat (TPR)-like superfamily protein isoform 4	356	20	2.62125e-24	96.39	5	F:GO:0003676; F:GO:0004523; C:GO:0016021; P:GO:0051252; P:GO:0090502	F:nucleic acid binding; F:RNA-DNA hybrid ribonuclease activity; C:integral component of membrane; P:regulation of RNA metabolic process; P:RNA phosphodiester bond hydrolysis, endonucleolytic	EC:3.1.30; EC:3.1.26; EC:3.1.26.4	Acting on ester bonds; Acting on ester bonds; Ribonuclease H	no IPS match	no IPS match	no IPS match
HSK10172_c0_g2_i1	Tetratricopeptide repeat (TPR)-like superfamily protein isoform 1	1169	20	0	83.77	2	F:GO:0005515; C:GO:0016021	F:protein binding; C:integral component of membrane			IPR011990 (G3DSA:1.25.40.GENE3D); PF13432 (PFAM); IPR019734 (PFAM); mobidb-lite (MOBIDB_LITE); mobidb-lite (MOBIDB_LITE); PTHR26312:SF96 (PANTHER); PTHR26312 (PANTHER); IPR013026 (PROSITE_PROFILES); IPR019734 (PROSITE_PROFILES); IPR019734 (PROSITE_PROFILES); IPR019734 (PROSITE_PROFILES); IPR013026 (PROSITE_PROFILES); IPR011990 (SUPERFAMILY)	F:GO:0005515	F:protein binding
HSK10173_c0_g1_i1	---NA---	222									no IPS match	no IPS match	no IPS match
HSK10173_c0_g1_i2	uncharacterized serine-rich protein C1E8.05-like	673	20	4.18892e-26	91.86						IPR012552 (PFAM); mobidb-lite (MOBIDB_LITE); PTHR33102:SF3 (PANTHER); PTHR33102 (PANTHER)	no GO terms	no GO terms
HSK10174_c0_g1_i1	Retrovirus-related Pol polyprotein from transposon TNT 1-94	1574	20	4.59417e-62	71.23	6	F:GO:0003676; F:GO:0005506; F:GO:0008270; F:GO:0016705; F:GO:0020037; P:GO:0055114	F:nucleic acid binding; F:iron ion binding; F:zinc ion binding; F:oxidoreductase activity, acting on paired donors, with incorporation or reduction of molecular oxygen; F:heme binding; P:oxidation-reduction process			mobidb-lite (MOBIDB_LITE)	no GO terms	no GO terms
HSK10175_c0_g1_i1	Photosystem II PsbX	637	20	8.06495e-57	87.92	3	C:GO:0009523; P:GO:0015979; C:GO:0016021	C:photosystem II; P:photosynthesis; C:integral component of membrane			IPR009518 (PFAM); G3DSA:1.20.5.510 (GENE3D); PTHR34455 (PANTHER)	C:GO:0009523; P:GO:0015979; C:GO:0016020	C:photosystem II; P:photosynthesis; C:membrane
HSK10176_c0_g1_i1	DTW domain-containing protein isoform 2	1635	20	0	79.75						IPR005636 (PFAM); PTHR21392 (PANTHER); PTHR21392:SF4 (PANTHER)	no GO terms	no GO terms
HSK10176_c0_g1_i2	DTW domain-containing family protein	1021	20	0	81.14						IPR005636 (PFAM); PTHR21392 (PANTHER); PTHR21392:SF4 (PANTHER)	no GO terms	no GO terms
HSK10176_c0_g1_i3	DTW domain-containing protein isoform 2	1053	20	0	79.27						IPR005636 (PFAM); PTHR21392:SF4 (PANTHER); PTHR21392 (PANTHER)	no GO terms	no GO terms
HSK10176_c0_g1_i4	DTW domain-containing protein isoform 2	1667	20	0	79.83						IPR005636 (PFAM); PTHR21392:SF4 (PANTHER); PTHR21392 (PANTHER)	no GO terms	no GO terms
HSK10176_c0_g2_i1	DTW domain-containing protein	499	20	8.04227e-31	87.06						mobidb-lite (MOBIDB_LITE)	no GO terms	no GO terms
HSK10177_c0_g1_i1	photosystem II 22 kDa protein, chloroplastic	1182	20	3.83206e-147	87.23	3	C:GO:0009535; C:GO:0016021; P:GO:0055085	C:chloroplast thylakoid membrane; C:integral component of membrane; P:transmembrane transport			IPR023329 (G3DSA:1.10.3460.GENE3D); IPR022796 (PFAM); PTHR14154:SF39 (PANTHER); PTHR14154 (PANTHER); SSF103511 (SUPERFAMILY)	no GO terms	no GO terms
HSK10178_c0_g1_i1	phosphatidyl-N-methylethanolamine N-methyltransferase	680	20	6.11216e-103	92.6	10	F:GO:0000773; F:GO:0004608; C:GO:0005789; P:GO:0006544; P:GO:0006563; P:GO:0006566; P:GO:0006656; C:GO:0016021; P:GO:0032259; F:GO:0080101	F:phosphatidyl-N-methylethanolamine N-methyltransferase activity; F:phosphatidylethanolamine N-methyltransferase activity; C:endoplasmic reticulum membrane; P:glycine metabolic process; P:L-serine metabolic process; P:threonine metabolic process; P:phosphatidylcholine biosynthetic process; C:integral component of membrane; P:methylation; F:phosphatidyl-N-dimethylethanolamine N-methyltransferase a…	EC:2.1.1.71; EC:2.1.1.17	Phosphatidyl-N-methylethanolamine N-methyltransferase; Phosphatidylethanolamine N-methyltransferase	IPR007318 (PFAM); IPR024960 (PANTHER); PTHR15458:SF5 (PANTHER); IPR024960 (HAMAP)	P:GO:0006656; F:GO:0008757	P:phosphatidylcholine biosynthetic process; F:S-adenosylmethionine-dependent methyltransferase activity
HSK10179_c0_g1_i1	---NA---	353									no IPS match	no IPS match	no IPS match
HSK1018_c0_g1_i1	---NA---	203									no IPS match	no IPS match	no IPS match
HSK10180_c0_g1_i1	eukaryotic translation initiation factor 3 subunit A	960	20	1.78841e-51	76.68						mobidb-lite (MOBIDB_LITE); PTHR36364 (PANTHER)	no GO terms	no GO terms
HSK10180_c0_g1_i2	eukaryotic translation initiation factor 3 subunit A	1410	20	1.19167e-153	70.32						mobidb-lite (MOBIDB_LITE); PTHR36364 (PANTHER)	no GO terms	no GO terms
HSK10180_c0_g1_i3	eukaryotic translation initiation factor 3 subunit A	1322	20	0	72.44						mobidb-lite (MOBIDB_LITE); PTHR36364 (PANTHER)	no GO terms	no GO terms
HSK10181_c0_g1_i1	CAAX amino terminal protease	213	20	6.12635e-18	91.7	3	P:GO:0006508; F:GO:0008233; C:GO:0016021	P:proteolysis; F:peptidase activity; C:integral component of membrane			no IPS match	no IPS match	no IPS match
HSK10181_c0_g1_i2	Abi domain-containing protein	703	20	4.73112e-98	94.22	1	C:GO:0016021	C:integral component of membrane			IPR003675 (PFAM); PTHR43592:SF7 (PANTHER); PTHR43592 (PANTHER)	C:GO:0016020	C:membrane
HSK10181_c0_g1_i3	hypothetical protein CISIN_1g0220831mg	253	11	9.25779e-07	100	2	C:GO:0016020; C:GO:0016021	C:membrane; C:integral component of membrane			no IPS match	no IPS match	no IPS match
HSK10182_c0_g1_i1	---NA---	335									no IPS match	no IPS match	no IPS match
HSK10182_c1_g1_i1	---NA---	573									no IPS match	no IPS match	no IPS match
HSK10182_c2_g1_i1	---NA---	255									no IPS match	no IPS match	no IPS match
HSK10183_c0_g1_i1	SWR1 complex subunit 6	1060	20	2.28368e-112	90.03	7	C:GO:0000118; C:GO:0000812; P:GO:0031063; F:GO:0031491; F:GO:0042826; P:GO:0043486; F:GO:0046872	C:histone deacetylase complex; C:Swr1 complex; P:regulation of histone deacetylation; F:nucleosome binding; F:histone deacetylase binding; P:histone exchange; F:metal ion binding			IPR007529 (PFAM); mobidb-lite (MOBIDB_LITE); PTHR13093 (PANTHER); IPR007529 (PROSITE_PROFILES)	no GO terms	no GO terms
HSK10183_c0_g1_i2	SWR1 complex subunit 6	1259	20	2.27502e-111	90.03	7	C:GO:0000118; C:GO:0000812; P:GO:0031063; F:GO:0031491; F:GO:0042826; P:GO:0043486; F:GO:0046872	C:histone deacetylase complex; C:Swr1 complex; P:regulation of histone deacetylation; F:nucleosome binding; F:histone deacetylase binding; P:histone exchange; F:metal ion binding			IPR007529 (PFAM); mobidb-lite (MOBIDB_LITE); PTHR13093 (PANTHER); IPR007529 (PROSITE_PROFILES)	no GO terms	no GO terms
HSK10183_c0_g2_i1	laccase family protein	301	20	1.2022e-29	88.35	6	F:GO:0005507; F:GO:0016722; P:GO:0046274; C:GO:0048046; F:GO:0052716; P:GO:0055114	F:copper ion binding; F:oxidoreductase activity, oxidizing metal ions; P:lignin catabolic process; C:apoplast; F:hydroquinone:oxygen oxidoreductase activity; P:oxidation-reduction process	EC:1.10.3; EC:1.10.3.2	Acting on diphenols and related substances as donors; Laccase	no IPS match	no IPS match	no IPS match
HSK10184_c0_g1_i1	IRK-interacting protein-like	889	20	1.91438e-109	80.61	2	F:GO:0016301; P:GO:0016310	F:kinase activity; P:phosphorylation			mobidb-lite (MOBIDB_LITE); PTHR31029:SF4 (PANTHER); PTHR31029 (PANTHER)	no GO terms	no GO terms
HSK10185_c0_g1_i1	protein FAM136A-like	743	20	3.16395e-106	91.2	2	C:GO:0005575; P:GO:0008150	C:cellular_component; P:biological_process			IPR008560 (PFAM); IPR008560 (PANTHER)	no GO terms	no GO terms
HSK10186_c0_g1_i1	hypothetical protein CICLE_v10030487mg	327	20	5.66148e-52	85.57						PTHR32387 (PANTHER); PTHR32387:SF3 (PANTHER)	no GO terms	no GO terms
HSK10186_c0_g2_i1	DNA binding protein, putative	632	20	5.26576e-140	86.89	4	F:GO:0005524; P:GO:0006468; F:GO:0008353; P:GO:0009069	F:ATP binding; P:protein phosphorylation; F:RNA polymerase II carboxy-terminal domain kinase activity; P:serine family amino acid metabolic process	EC:2.7.11; EC:2.7.11.23	Transferring phosphorus-containing groups; [RNA-polymerase]-subunit kinase	PTHR32387 (PANTHER); PTHR32387:SF3 (PANTHER)	no GO terms	no GO terms
HSK10186_c1_g1_i1	hypothetical protein CISIN_1g039041mg, partial	306	20	2.5413e-60	86.07						PTHR32387:SF3 (PANTHER); PTHR32387 (PANTHER)	no GO terms	no GO terms
HSK10187_c0_g1_i1	disease resistance protein RPS2-like	218	20	9.93369e-40	95.42	1	F:GO:0043531	F:ADP binding			PTHR44061 (PANTHER)	no GO terms	no GO terms
HSK10187_c0_g1_i2	disease resistance protein At4g27190-like	218	20	1.85073e-39	94.1	1	F:GO:0043531	F:ADP binding			PTHR44061 (PANTHER)	no GO terms	no GO terms
HSK10188_c0_g1_i1	---NA---	277									no IPS match	no IPS match	no IPS match
HSK10188_c0_g2_i1	PREDICTED: uncharacterized protein LOC102609825 isoform X2	857	20	3.1791e-66	79.04	1	C:GO:0009941	C:chloroplast envelope			PTHR36737 (PANTHER)	no GO terms	no GO terms
HSK10188_c0_g2_i2	hypothetical protein CISIN_1g040830mg	926	20	7.71545e-84	92.01						PTHR36737 (PANTHER)	no GO terms	no GO terms
HSK10188_c0_g2_i3	hypothetical protein CICLE_v10013772mg	658	20	1.03861e-46	94.82						PTHR36737 (PANTHER)	no GO terms	no GO terms
HSK10189_c0_g1_i1	30S ribosomal protein S1-like isoform X1	479	20	1.53208e-27	84.31	2	F:GO:0003676; C:GO:0005840	F:nucleic acid binding; C:ribosome			no IPS match	no IPS match	no IPS match
HSK10190_c0_g1_i1	phytosulfokine receptor 1	3456	20	0	87.12	14	F:GO:0001653; F:GO:0004383; F:GO:0004674; F:GO:0005515; F:GO:0005524; P:GO:0006144; P:GO:0006182; P:GO:0006468; P:GO:0007165; P:GO:0009069; C:GO:0016021; P:GO:0031347; P:GO:0045087; P:GO:0046039	F:peptide receptor activity; F:guanylate cyclase activity; F:protein serine/threonine kinase activity; F:protein binding; F:ATP binding; P:purine nucleobase metabolic process; P:cGMP biosynthetic process; P:protein phosphorylation; P:signal transduction; P:serine family amino acid metabolic process; C:integral component of membrane; P:regulation of defense response; P:innate immune response; P:GT…	EC:2.7.11; EC:4.6.1.2	Transferring phosphorus-containing groups; Guanylate cyclase	PR00019 (PRINTS); G3DSA:3.30.200.20 (GENE3D); IPR032675 (G3DSA:3.80.10.GENE3D); IPR000719 (PFAM); IPR001611 (PFAM); IPR032675 (G3DSA:3.80.10.GENE3D); IPR032675 (G3DSA:3.80.10.GENE3D); IPR013210 (PFAM); G3DSA:1.10.510.10 (GENE3D); PTHR43932 (PANTHER); PTHR43932:SF6 (PANTHER); IPR001611 (PROSITE_PROFILES); IPR001611 (PROSITE_PROFILES); IPR001611 (PROSITE_PROFILES); IPR001611 (PROSITE_PROFILES); IPR…	F:GO:0004672; F:GO:0005515; F:GO:0005524; P:GO:0006468	F:protein kinase activity; F:protein binding; F:ATP binding; P:protein phosphorylation
HSK10191_c0_g1_i1	aldehyde dehydrogenase family 3 member F1	1608	20	0	87.28	8	F:GO:0004030; P:GO:0006081; P:GO:0006094; P:GO:0006096; P:GO:0006547; P:GO:0006558; P:GO:0006570; P:GO:0055114	F:aldehyde dehydrogenase [NAD(P)+] activity; P:cellular aldehyde metabolic process; P:gluconeogenesis; P:glycolytic process; P:histidine metabolic process; P:L-phenylalanine metabolic process; P:tyrosine metabolic process; P:oxidation-reduction process	EC:1.2.1.5	Aldehyde dehydrogenase (NAD(P)(+))	IPR016163 (G3DSA:3.40.309.GENE3D); IPR015590 (PFAM); IPR016162 (G3DSA:3.40.605.GENE3D); IPR012394 (PIRSF); PTHR43570 (PANTHER); PTHR43570:SF17 (PANTHER); IPR016161 (SUPERFAMILY)	F:GO:0004030; P:GO:0006081; P:GO:0008152; F:GO:0016491; F:GO:0016620; P:GO:0055114	F:aldehyde dehydrogenase [NAD(P)+] activity; P:cellular aldehyde metabolic process; P:metabolic process; F:oxidoreductase activity; F:oxidoreductase activity, acting on the aldehyde or oxo group of donors, NAD or NADP as acceptor; P:oxidation-reduction process
HSK10191_c0_g1_i2	aldehyde dehydrogenase family 3 member F1	420	20	4.13566e-86	88.06	8	F:GO:0004030; P:GO:0006081; P:GO:0006094; P:GO:0006096; P:GO:0006547; P:GO:0006558; P:GO:0006570; P:GO:0055114	F:aldehyde dehydrogenase [NAD(P)+] activity; P:cellular aldehyde metabolic process; P:gluconeogenesis; P:glycolytic process; P:histidine metabolic process; P:L-phenylalanine metabolic process; P:tyrosine metabolic process; P:oxidation-reduction process	EC:1.2.1.5	Aldehyde dehydrogenase (NAD(P)(+))	IPR016162 (G3DSA:3.40.605.GENE3D); IPR015590 (PFAM); PTHR43570 (PANTHER); PTHR43570:SF17 (PANTHER); IPR016161 (SUPERFAMILY)	P:GO:0008152; F:GO:0016491; P:GO:0055114	P:metabolic process; F:oxidoreductase activity; P:oxidation-reduction process
HSK10191_c0_g1_i3	aldehyde dehydrogenase family 3 member F1	1623	20	0	88.22	8	F:GO:0004030; P:GO:0006081; P:GO:0006094; P:GO:0006096; P:GO:0006547; P:GO:0006558; P:GO:0006570; P:GO:0055114	F:aldehyde dehydrogenase [NAD(P)+] activity; P:cellular aldehyde metabolic process; P:gluconeogenesis; P:glycolytic process; P:histidine metabolic process; P:L-phenylalanine metabolic process; P:tyrosine metabolic process; P:oxidation-reduction process	EC:1.2.1.5	Aldehyde dehydrogenase (NAD(P)(+))	IPR012394 (PIRSF); IPR015590 (PFAM); IPR016162 (G3DSA:3.40.605.GENE3D); IPR016163 (G3DSA:3.40.309.GENE3D); PTHR43570:SF17 (PANTHER); PTHR43570 (PANTHER); IPR016161 (SUPERFAMILY)	F:GO:0004030; P:GO:0006081; P:GO:0008152; F:GO:0016491; F:GO:0016620; P:GO:0055114	F:aldehyde dehydrogenase [NAD(P)+] activity; P:cellular aldehyde metabolic process; P:metabolic process; F:oxidoreductase activity; F:oxidoreductase activity, acting on the aldehyde or oxo group of donors, NAD or NADP as acceptor; P:oxidation-reduction process
HSK10192_c0_g1_i1	N-alpha-acetyltransferase MAK3	750	20	1.66529e-144	92.19	4	F:GO:0004596; P:GO:0006474; C:GO:0031417; P:GO:0042967	F:peptide alpha-N-acetyltransferase activity; P:N-terminal protein amino acid acetylation; C:NatC complex; P:obsolete acyl-carrier-protein biosynthetic process	EC:2.3.1.88	Acyltransferases	IPR000182 (PFAM); G3DSA:3.40.630.30 (GENE3D); PTHR23091 (PANTHER); PTHR23091:SF66 (PANTHER); IPR000182 (PROSITE_PROFILES); cd04301 (CDD); IPR016181 (SUPERFAMILY)	no GO terms	no GO terms
HSK10193_c0_g1_i1	hypothetical protein CICLE_v10006357mg	478	20	8.82444e-48	74.02	1	C:GO:0016021	C:integral component of membrane			PTHR33726:SF6 (PANTHER); PTHR33726 (PANTHER)	no GO terms	no GO terms
HSK10194_c0_g1_i1	---NA---	301									mobidb-lite (MOBIDB_LITE)	no GO terms	no GO terms
HSK10194_c0_g2_i1	---NA---	321									no IPS match	no IPS match	no IPS match
HSK10195_c0_g1_i1	RNA pseudouridine synthase 4, mitochondrial isoform X1	1785	20	0	84.84	5	F:GO:0003723; C:GO:0005739; F:GO:0009982; F:GO:0019239; P:GO:0031119	F:RNA binding; C:mitochondrion; F:pseudouridine synthase activity; F:deaminase activity; P:tRNA pseudouridine synthesis	EC:5.4.99.12	tRNA pseudouridine(38-40) synthase	IPR006145 (PFAM); PTHR44832 (PANTHER); PTHR44832:SF1 (PANTHER); IPR006145 (CDD); IPR020103 (SUPERFAMILY)	P:GO:0001522; F:GO:0003723; P:GO:0009451; F:GO:0009982	P:pseudouridine synthesis; F:RNA binding; P:RNA modification; F:pseudouridine synthase activity
HSK10195_c0_g1_i2	RNA pseudouridine synthase 4, mitochondrial	891	20	9.74747e-163	83.25	5	F:GO:0003723; C:GO:0005739; F:GO:0009982; F:GO:0019239; P:GO:0031119	F:RNA binding; C:mitochondrion; F:pseudouridine synthase activity; F:deaminase activity; P:tRNA pseudouridine synthesis	EC:5.4.99.12	tRNA pseudouridine(38-40) synthase	G3DSA:3.30.2350.10 (GENE3D); IPR006145 (PFAM); PTHR44832:SF1 (PANTHER); PTHR44832 (PANTHER); IPR006145 (CDD); IPR020103 (SUPERFAMILY)	P:GO:0001522; F:GO:0003723; P:GO:0009451; F:GO:0009982	P:pseudouridine synthesis; F:RNA binding; P:RNA modification; F:pseudouridine synthase activity
HSK10196_c0_g1_i1	PREDICTED: uncharacterized protein LOC102627503	595	20	1.50067e-46	86.3						mobidb-lite (MOBIDB_LITE)	no GO terms	no GO terms
HSK10197_c0_g1_i1	---NA---	443									no IPS match	no IPS match	no IPS match
HSK10197_c0_g1_i2	chaperone protein dnaJ 1, mitochondrial isoform X1	758	20	4.21549e-68	89.55	6	F:GO:0005524; P:GO:0006457; P:GO:0009408; F:GO:0031072; F:GO:0046872; F:GO:0051082	F:ATP binding; P:protein folding; P:response to heat; F:heat shock protein binding; F:metal ion binding; F:unfolded protein binding			G3DSA:2.60.260.20 (GENE3D); PTHR43096:SF27 (PANTHER); PTHR43096 (PANTHER); IPR008971 (SUPERFAMILY)	P:GO:0006457; F:GO:0051082	P:protein folding; F:unfolded protein binding
HSK10197_c0_g1_i3	chaperone protein dnaJ 1, mitochondrial isoform X1	413	20	3.8338e-53	94.57	6	F:GO:0005524; P:GO:0006457; P:GO:0009408; F:GO:0031072; F:GO:0046872; F:GO:0051082	F:ATP binding; P:protein folding; P:response to heat; F:heat shock protein binding; F:metal ion binding; F:unfolded protein binding			no IPS match	no IPS match	no IPS match
HSK10198_c0_g1_i1	protein NRT1/ PTR FAMILY 1.2-like	682	20	1.76577e-16	64.95	3	C:GO:0016021; F:GO:0022857; P:GO:0055085	C:integral component of membrane; F:transmembrane transporter activity; P:transmembrane transport			PTHR11654:SF157 (PANTHER); IPR000109 (PANTHER)	C:GO:0016020; F:GO:0022857; P:GO:0055085	C:membrane; F:transmembrane transporter activity; P:transmembrane transport
HSK10198_c0_g1_i2	protein NRT1/ PTR FAMILY 1.2	1570	20	3.58803e-71	58.15	3	C:GO:0016020; F:GO:0022857; P:GO:0055085	C:membrane; F:transmembrane transporter activity; P:transmembrane transport			no IPS match	no IPS match	no IPS match
HSK10198_c0_g1_i3	protein NRT1/ PTR FAMILY 1.1	983	20	1.46319e-21	58.03	4	C:GO:0016020; C:GO:0016021; F:GO:0022857; P:GO:0055085	C:membrane; C:integral component of membrane; F:transmembrane transporter activity; P:transmembrane transport			no IPS match	no IPS match	no IPS match
HSK10198_c0_g1_i4	protein NRT1/ PTR FAMILY 1.2	1665	20	3.32058e-71	58.15	3	C:GO:0016020; F:GO:0022857; P:GO:0055085	C:membrane; F:transmembrane transporter activity; P:transmembrane transport			no IPS match	no IPS match	no IPS match
HSK10198_c0_g1_i5	protein NRT1/ PTR FAMILY 1.2-like	777	20	3.16827e-16	65	3	C:GO:0016021; F:GO:0022857; P:GO:0055085	C:integral component of membrane; F:transmembrane transporter activity; P:transmembrane transport			PTHR11654:SF157 (PANTHER); IPR000109 (PANTHER); IPR000109 (PANTHER); PTHR11654:SF157 (PANTHER)	C:GO:0016020; F:GO:0022857; P:GO:0055085	C:membrane; F:transmembrane transporter activity; P:transmembrane transport
HSK10199_c0_g1_i1	RING-H2 finger protein ATL67	1132	20	7.90716e-84	82.85	6	F:GO:0008168; C:GO:0016021; P:GO:0016567; P:GO:0032259; P:GO:0043161; F:GO:0061630	F:methyltransferase activity; C:integral component of membrane; P:protein ubiquitination; P:methylation; P:proteasome-mediated ubiquitin-dependent protein catabolic process; F:ubiquitin protein ligase activity			IPR013083 (G3DSA:3.30.40.GENE3D); IPR001841 (PFAM); PTHR14155 (PANTHER); PTHR14155:SF71 (PANTHER); IPR001841 (PROSITE_PROFILES); cd16454 (CDD); SSF57850 (SUPERFAMILY)	no GO terms	no GO terms
HSK10200_c0_g1_i1	F-box/kelch-repeat protein At3g23880-like	1388	20	0	56.38	1	F:GO:0005515	F:protein binding			IPR013187 (PFAM); IPR001810 (PFAM); IPR017451 (TIGRFAM); IPR036047 (SUPERFAMILY)	F:GO:0005515	F:protein binding
HSK10201_c0_g1_i1	---NA---	415									no IPS match	no IPS match	no IPS match
HSK10202_c0_g1_i1	probable LL-diaminopimelate aminotransferase, chloroplastic	1907	20	0	89.85	4	F:GO:0008483; P:GO:0009058; C:GO:0016021; F:GO:0030170	F:transaminase activity; P:biosynthetic process; C:integral component of membrane; F:pyridoxal phosphate binding			IPR004839 (PFAM); IPR015421 (G3DSA:3.40.640.GENE3D); IPR015422 (G3DSA:3.90.1150.GENE3D); IPR019942 (TIGRFAM); PTHR43144:SF2 (PANTHER); IPR019942 (PANTHER); cd00609 (CDD); IPR015424 (SUPERFAMILY)	F:GO:0003824; F:GO:0008483; P:GO:0009058; F:GO:0030170	F:catalytic activity; F:transaminase activity; P:biosynthetic process; F:pyridoxal phosphate binding
HSK10202_c0_g1_i2	probable LL-diaminopimelate aminotransferase, chloroplastic	2038	20	0	90.49	4	F:GO:0008483; P:GO:0009058; C:GO:0016021; F:GO:0030170	F:transaminase activity; P:biosynthetic process; C:integral component of membrane; F:pyridoxal phosphate binding			IPR015421 (G3DSA:3.40.640.GENE3D); IPR015422 (G3DSA:3.90.1150.GENE3D); IPR019942 (TIGRFAM); IPR004839 (PFAM); PTHR43144:SF2 (PANTHER); IPR019942 (PANTHER); cd00609 (CDD); IPR015424 (SUPERFAMILY)	F:GO:0003824; F:GO:0008483; P:GO:0009058; F:GO:0030170	F:catalytic activity; F:transaminase activity; P:biosynthetic process; F:pyridoxal phosphate binding
HSK10203_c0_g1_i1	protein DMR6-LIKE OXYGENASE 2-like	1353	20	0	85.98	3	F:GO:0016491; F:GO:0046872; P:GO:0055114	F:oxidoreductase activity; F:metal ion binding; P:oxidation-reduction process			PR00682 (PRINTS); IPR005123 (PFAM); IPR026992 (PFAM); IPR027443 (G3DSA:2.60.120.GENE3D); PTHR10209:SF127 (PANTHER); PTHR10209 (PANTHER); IPR005123 (PROSITE_PROFILES); SSF51197 (SUPERFAMILY)	F:GO:0016491; P:GO:0055114	F:oxidoreductase activity; P:oxidation-reduction process
HSK10203_c0_g1_i2	2-oxoglutarate (2OG) and Fe(II)-dependent oxygenase superfamily protein	1119	20	0	84.75	3	F:GO:0016491; F:GO:0046872; P:GO:0055114	F:oxidoreductase activity; F:metal ion binding; P:oxidation-reduction process			PR00682 (PRINTS); IPR027443 (G3DSA:2.60.120.GENE3D); IPR005123 (PFAM); IPR026992 (PFAM); PTHR10209 (PANTHER); PTHR10209:SF127 (PANTHER); IPR005123 (PROSITE_PROFILES); SSF51197 (SUPERFAMILY)	F:GO:0016491; P:GO:0055114	F:oxidoreductase activity; P:oxidation-reduction process
HSK10203_c0_g1_i3	protein DMR6-LIKE OXYGENASE 2-like	1336	20	0	88.46	3	F:GO:0016491; F:GO:0046872; P:GO:0055114	F:oxidoreductase activity; F:metal ion binding; P:oxidation-reduction process			PR00682 (PRINTS); IPR005123 (PFAM); IPR027443 (G3DSA:2.60.120.GENE3D); PTHR10209:SF127 (PANTHER); PTHR10209 (PANTHER); IPR005123 (PROSITE_PROFILES); SSF51197 (SUPERFAMILY)	F:GO:0016491; P:GO:0055114	F:oxidoreductase activity; P:oxidation-reduction process
HSK10204_c0_g1_i1	LOB domain-containing protein 33-like	1041	20	9.95889e-160	71.18						IPR004883 (PFAM); PTHR31529 (PANTHER); PTHR31529:SF6 (PANTHER); IPR004883 (PROSITE_PROFILES)	no GO terms	no GO terms
HSK10205_c0_g1_i1	---NA---	448									no IPS match	no IPS match	no IPS match
HSK10205_c0_g1_i2	---NA---	279									no IPS match	no IPS match	no IPS match
HSK10206_c0_g1_i1	ubiquitin-conjugating enzyme E2 2-like	603	20	6.14099e-24	80.38	2	F:GO:0005524; F:GO:0016740	F:ATP binding; F:transferase activity			no IPS match	no IPS match	no IPS match
HSK10206_c0_g1_i2	Ubiquitin-conjugating enzyme E2 2	248	20	9.21148e-08	78.72	2	F:GO:0005524; F:GO:0016740	F:ATP binding; F:transferase activity			no IPS match	no IPS match	no IPS match
HSK10206_c0_g2_i1	---NA---	241									no IPS match	no IPS match	no IPS match
HSK10207_c0_g1_i1	fimbrin-5	1253	20	0	95.3	1	F:GO:0003779	F:actin binding			IPR036872 (G3DSA:1.10.418.GENE3D); IPR036872 (G3DSA:1.10.418.GENE3D); IPR036872 (G3DSA:1.10.418.GENE3D); IPR001715 (PFAM); PTHR19961:SF55 (PANTHER); PTHR19961 (PANTHER); IPR001715 (PROSITE_PROFILES); IPR001715 (PROSITE_PROFILES); IPR001715 (PROSITE_PROFILES); IPR001715 (CDD); IPR001715 (CDD); IPR036872 (SUPERFAMILY)	F:GO:0005515	F:protein binding
HSK10207_c0_g1_i2	fimbrin-5	1469	20	0	91.65	1	F:GO:0003779	F:actin binding			IPR036872 (G3DSA:1.10.418.GENE3D); IPR036872 (G3DSA:1.10.418.GENE3D); IPR036872 (G3DSA:1.10.418.GENE3D); IPR001715 (PFAM); mobidb-lite (MOBIDB_LITE); PTHR19961 (PANTHER); PTHR19961:SF55 (PANTHER); IPR001715 (PROSITE_PROFILES); IPR001715 (PROSITE_PROFILES); IPR001715 (PROSITE_PROFILES); IPR001715 (CDD); IPR001715 (CDD); IPR036872 (SUPERFAMILY)	F:GO:0005515	F:protein binding
HSK10208_c0_g1_i1	histidine-containing phosphotransfer protein 1-like isoform X1	937	20	2.34193e-101	74.65	7	P:GO:0000160; C:GO:0005634; C:GO:0005737; P:GO:0009736; F:GO:0009927; P:GO:0016310; F:GO:0043424	P:phosphorelay signal transduction system; C:nucleus; C:cytoplasm; P:cytokinin-activated signaling pathway; F:histidine phosphotransfer kinase activity; P:phosphorylation; F:protein histidine kinase binding			IPR036641 (G3DSA:1.20.120.GENE3D); PTHR28242 (PANTHER); PTHR28242:SF2 (PANTHER); IPR036641 (SUPERFAMILY)	P:GO:0000160; F:GO:0004871	P:phosphorelay signal transduction system; F:signal transducer activity
HSK10209_c0_g1_i1	cold-regulated 413 inner membrane protein 1, chloroplastic-like	1203	20	1.39255e-120	88.85	1	C:GO:0016021	C:integral component of membrane			IPR008892 (PFAM); IPR008892 (PANTHER); PTHR33596:SF3 (PANTHER)	C:GO:0016021	C:integral component of membrane
HSK1021_c0_g1_i1	ATP-dependent DNA helicase At3g02060, chloroplastic isoform X1	451	20	9.62923e-45	68.29	3	F:GO:0003676; F:GO:0005524; P:GO:0006281	F:nucleic acid binding; F:ATP binding; P:DNA repair			mobidb-lite (MOBIDB_LITE)	no GO terms	no GO terms
HSK10210_c0_g1_i1	oligosaccharyltransferase complex subunit ostc	834	20	2.08482e-91	95.82	4	C:GO:0005886; C:GO:0008250; C:GO:0016021; F:GO:0016740	C:plasma membrane; C:oligosaccharyltransferase complex; C:integral component of membrane; F:transferase activity			IPR021149 (PFAM); PTHR13160 (PANTHER); PTHR13160:SF7 (PANTHER)	no GO terms	no GO terms
HSK10211_c0_g1_i1	putative yippee-like protein Os10g0369500	832	20	3.57578e-73	90.71	1	F:GO:0046872	F:metal ion binding			IPR004910 (PFAM); PTHR13848 (PANTHER); PTHR13848:SF16 (PANTHER); IPR034751 (PROSITE_PROFILES)	no GO terms	no GO terms
HSK10211_c1_g1_i1	putative phospholipid:diacylglycerol acyltransferase 2	656	20	2.60852e-41	74.1	5	F:GO:0008374; C:GO:0016021; P:GO:0016042; F:GO:0016298; P:GO:0042967	F:O-acyltransferase activity; C:integral component of membrane; P:lipid catabolic process; F:lipase activity; P:obsolete acyl-carrier-protein biosynthetic process			PTHR11440 (PANTHER); PTHR11440:SF54 (PANTHER)	no GO terms	no GO terms
HSK10212_c0_g1_i1	DNA binding protein, putative	548	20	4.55264e-62	73.48						PTHR34451:SF2 (PANTHER); PTHR34451 (PANTHER)	no GO terms	no GO terms
HSK10212_c0_g2_i1	DNA binding protein, putative	461	20	2.05104e-67	77						mobidb-lite (MOBIDB_LITE)	no GO terms	no GO terms
HSK10213_c0_g1_i1	---NA---	548									no IPS match	no IPS match	no IPS match
HSK10214_c0_g1_i1	Aldo/keto reductase	760	20	2.08909e-89	83.71	1	C:GO:0016021	C:integral component of membrane			IPR005182 (PFAM); PTHR35688:SF2 (PANTHER); PTHR35688 (PANTHER)	no GO terms	no GO terms
HSK10215_c0_g1_i1	metal-independent phosphoserine phosphatase	1180	20	1.49058e-164	89.22	3	C:GO:0005829; P:GO:0016311; F:GO:0016791	C:cytosol; P:dephosphorylation; F:phosphatase activity	EC:3.1.3.41	4-nitrophenylphosphatase	IPR029033 (G3DSA:3.40.50.GENE3D); PIRSF000709 (PIRSF); IPR013078 (PFAM); PTHR23029:SF56 (PANTHER); PTHR23029 (PANTHER); IPR013078 (CDD); IPR029033 (SUPERFAMILY)	no GO terms	no GO terms
HSK10216_c0_g1_i1	vacuolar amino acid transporter 1 isoform X1	1219	20	0	93.39	1	C:GO:0016021	C:integral component of membrane			IPR013057 (PFAM); PTHR22950 (PANTHER); PTHR22950:SF358 (PANTHER)	no GO terms	no GO terms
HSK10216_c0_g2_i1	vacuolar amino acid transporter 1 isoform X1	316	20	1.83977e-68	88.04	1	C:GO:0016021	C:integral component of membrane			PTHR22950 (PANTHER); PTHR22950:SF358 (PANTHER)	no GO terms	no GO terms
HSK10216_c0_g3_i1	vacuolar amino acid transporter 1 isoform X1	415	20	2.07204e-24	90.75	1	C:GO:0016021	C:integral component of membrane			mobidb-lite (MOBIDB_LITE)	no GO terms	no GO terms
HSK10218_c0_g1_i1	rac-like GTP-binding protein RAC1	769	20	1.44502e-40	97.05	4	F:GO:0003924; F:GO:0005525; C:GO:0005622; P:GO:0007264	F:GTPase activity; F:GTP binding; C:intracellular; P:small GTPase mediated signal transduction	EC:3.6.1.15	Nucleoside-triphosphate phosphatase	PR00449 (PRINTS); IPR001806 (PFAM); G3DSA:3.40.50.300 (GENE3D); IPR005225 (TIGRFAM); PTHR24072 (PANTHER); PTHR24072:SF249 (PANTHER); IPR003578 (PROSITE_PROFILES); IPR027417 (SUPERFAMILY)	F:GO:0003924; F:GO:0005525; C:GO:0005622; P:GO:0007264	F:GTPase activity; F:GTP binding; C:intracellular; P:small GTPase mediated signal transduction
HSK10218_c0_g1_i2	rac-like GTP-binding protein 5	1190	20	1.12285e-123	98.51	7	F:GO:0003924; F:GO:0004767; F:GO:0005525; C:GO:0005737; P:GO:0006687; P:GO:0007264; C:GO:0016020	F:GTPase activity; F:sphingomyelin phosphodiesterase activity; F:GTP binding; C:cytoplasm; P:glycosphingolipid metabolic process; P:small GTPase mediated signal transduction; C:membrane	EC:3.1.4.12; EC:3.6.1.15	Sphingomyelin phosphodiesterase; Nucleoside-triphosphate phosphatase	PR00449 (PRINTS); G3DSA:3.40.50.300 (GENE3D); IPR001806 (PFAM); IPR005225 (TIGRFAM); PTHR24072 (PANTHER); PTHR24072:SF249 (PANTHER); IPR003578 (PROSITE_PROFILES); cd04133 (CDD); IPR027417 (SUPERFAMILY)	F:GO:0003924; F:GO:0005525; C:GO:0005622; P:GO:0007264	F:GTPase activity; F:GTP binding; C:intracellular; P:small GTPase mediated signal transduction
HSK10218_c0_g1_i3	Rho-related protein from plants 4	534	20	3.60919e-34	90.88	7	F:GO:0003924; F:GO:0005515; F:GO:0005525; C:GO:0005634; C:GO:0005737; P:GO:0007264; C:GO:0016021	F:GTPase activity; F:protein binding; F:GTP binding; C:nucleus; C:cytoplasm; P:small GTPase mediated signal transduction; C:integral component of membrane	EC:3.6.1.15	Nucleoside-triphosphate phosphatase	G3DSA:3.40.50.300 (GENE3D); IPR001806 (PFAM); PTHR24072:SF178 (PANTHER); PTHR24072 (PANTHER); IPR027417 (SUPERFAMILY)	F:GO:0003924; F:GO:0005525	F:GTPase activity; F:GTP binding
HSK10218_c0_g1_i4	rac-like GTP-binding protein ARAC3	1411	20	7.48647e-96	97.52	7	F:GO:0003924; F:GO:0004767; F:GO:0005525; C:GO:0005737; P:GO:0006687; P:GO:0007264; C:GO:0016020	F:GTPase activity; F:sphingomyelin phosphodiesterase activity; F:GTP binding; C:cytoplasm; P:glycosphingolipid metabolic process; P:small GTPase mediated signal transduction; C:membrane	EC:3.1.4.12; EC:3.6.1.15	Sphingomyelin phosphodiesterase; Nucleoside-triphosphate phosphatase	PR00449 (PRINTS); IPR005225 (TIGRFAM); IPR001806 (PFAM); G3DSA:3.40.50.300 (GENE3D); PTHR24072:SF249 (PANTHER); PTHR24072 (PANTHER); IPR003578 (PROSITE_PROFILES); cd04133 (CDD); IPR027417 (SUPERFAMILY)	F:GO:0003924; F:GO:0005525; C:GO:0005622; P:GO:0007264	F:GTPase activity; F:GTP binding; C:intracellular; P:small GTPase mediated signal transduction
HSK10218_c0_g1_i5	Rac-like GTP-binding protein 5	1493	20	2.51937e-28	95.66	7	F:GO:0003924; F:GO:0004767; F:GO:0005525; C:GO:0005737; P:GO:0006687; P:GO:0007264; C:GO:0016020	F:GTPase activity; F:sphingomyelin phosphodiesterase activity; F:GTP binding; C:cytoplasm; P:glycosphingolipid metabolic process; P:small GTPase mediated signal transduction; C:membrane	EC:3.1.4.12; EC:3.6.1.15	Sphingomyelin phosphodiesterase; Nucleoside-triphosphate phosphatase	no IPS match	no IPS match	no IPS match
HSK10218_c0_g1_i6	rac-like GTP-binding protein 5	871	20	7.62683e-37	95.91	9	F:GO:0003924; F:GO:0004767; F:GO:0005525; C:GO:0005829; P:GO:0006687; P:GO:0007264; P:GO:0015031; C:GO:0030906; P:GO:0042147	F:GTPase activity; F:sphingomyelin phosphodiesterase activity; F:GTP binding; C:cytosol; P:glycosphingolipid metabolic process; P:small GTPase mediated signal transduction; P:protein transport; C:retromer, cargo-selective complex; P:retrograde transport, endosome to Golgi	EC:3.1.4.12; EC:3.6.1.15	Sphingomyelin phosphodiesterase; Nucleoside-triphosphate phosphatase	no IPS match	no IPS match	no IPS match
HSK10219_c0_g1_i1	---NA---	410									no IPS match	no IPS match	no IPS match
HSK10219_c0_g2_i1	---NA---	309									no IPS match	no IPS match	no IPS match
HSK10220_c0_g1_i1	hypothetical protein CUMW_139900	1197	20	9.28337e-53	70.55	2	C:GO:0016020; C:GO:0016021	C:membrane; C:integral component of membrane			no IPS match	no IPS match	no IPS match
HSK10220_c0_g1_i2	hypothetical protein CUMW_139900	869	18	3.61133e-53	69.11	2	C:GO:0016020; C:GO:0016021	C:membrane; C:integral component of membrane			no IPS match	no IPS match	no IPS match
HSK10220_c0_g1_i3	ATPase WRNIP1	1298	20	1.04107e-52	68.36	2	C:GO:0016020; C:GO:0016021	C:membrane; C:integral component of membrane			no IPS match	no IPS match	no IPS match
HSK10220_c0_g2_i1	putative nuclease HARBI1	365	20	1.41687e-29	75.79						no IPS match	no IPS match	no IPS match
HSK10221_c0_g1_i1	putative cytoskeletal protein mRNA	3152	20	0	88.74	3	F:GO:0005515; F:GO:0016301; P:GO:0016310	F:protein binding; F:kinase activity; P:phosphorylation			IPR000270 (PFAM); IPR011990 (G3DSA:1.25.40.GENE3D); G3DSA:3.10.20.90 (GENE3D); mobidb-lite (MOBIDB_LITE); mobidb-lite (MOBIDB_LITE); mobidb-lite (MOBIDB_LITE); mobidb-lite (MOBIDB_LITE); mobidb-lite (MOBIDB_LITE); mobidb-lite (MOBIDB_LITE); PTHR22904:SF437 (PANTHER); PTHR22904 (PANTHER); IPR013026 (PROSITE_PROFILES); IPR019734 (PROSITE_PROFILES); IPR000270 (PROSITE_PROFILES); IPR019734 (PROSITE_P…	F:GO:0005515	F:protein binding
HSK10222_c0_g1_i1	---NA---	466									mobidb-lite (MOBIDB_LITE)	no GO terms	no GO terms
HSK10223_c0_g1_i1	---NA---	609									mobidb-lite (MOBIDB_LITE)	no GO terms	no GO terms
HSK10224_c0_g1_i1	---NA---	329									no IPS match	no IPS match	no IPS match
HSK10224_c0_g2_i1	---NA---	288									no IPS match	no IPS match	no IPS match
HSK10225_c0_g1_i1	DNA repair protein XRCC3 homolog	551	20	1.04549e-101	84.08	16	F:GO:0000150; F:GO:0000400; P:GO:0000707; F:GO:0003690; F:GO:0003697; F:GO:0004520; F:GO:0005524; C:GO:0005657; P:GO:0006308; P:GO:0006312; P:GO:0007131; F:GO:0008094; P:GO:0010212; C:GO:0016021; C:GO:0033063; P:GO:0042148	F:recombinase activity; F:four-way junction DNA binding; P:meiotic DNA recombinase assembly; F:double-stranded DNA binding; F:single-stranded DNA binding; F:endodeoxyribonuclease activity; F:ATP binding; C:replication fork; P:DNA catabolic process; P:mitotic recombination; P:reciprocal meiotic recombination; F:DNA-dependent ATPase activity; P:response to ionizing radiation; C:integral component o…	EC:3.6.1.3; EC:3.6.1.15	Adenosinetriphosphatase; Nucleoside-triphosphate phosphatase	IPR013632 (PFAM); G3DSA:3.40.50.300 (GENE3D); PTHR22942:SF24 (PANTHER); PTHR22942 (PANTHER); IPR027417 (SUPERFAMILY)	no GO terms	no GO terms
HSK10226_c0_g1_i1	Ubiquitin-conjugating enzyme E2 2	456	11	5.45625e-08	77.28	5	F:GO:0000166; F:GO:0005524; C:GO:0016020; C:GO:0016021; F:GO:0016740	F:nucleotide binding; F:ATP binding; C:membrane; C:integral component of membrane; F:transferase activity			no IPS match	no IPS match	no IPS match
HSK10226_c0_g2_i1	---NA---	875									no IPS match	no IPS match	no IPS match
HSK10227_c0_g1_i1	scarecrow-like protein 3	1381	20	0	88.43	8	F:GO:0000989; F:GO:0003700; C:GO:0005634; C:GO:0005667; P:GO:0006355; P:GO:0006355; P:GO:0009739; F:GO:0043565	F:transcription factor activity, transcription factor binding; F:DNA binding transcription factor activity; C:nucleus; C:transcription factor complex; P:regulation of transcription, DNA-templated; P:regulation of transcription, DNA-templated; P:response to gibberellin; F:sequence-specific DNA binding			IPR005202 (PFAM); IPR030008 (PTHR31636:PANTHER); PTHR31636 (PANTHER); IPR005202 (PROSITE_PROFILES)	F:GO:0000989; C:GO:0005634	F:transcription factor activity, transcription factor binding; C:nucleus
HSK10227_c0_g2_i1	---NA---	262									no IPS match	no IPS match	no IPS match
HSK10228_c0_g1_i1	(R)-specific enoyl-CoA hydratase	494	20	1.3152e-89	87.76	12	F:GO:0004017; F:GO:0005524; C:GO:0005634; C:GO:0005739; P:GO:0006144; P:GO:0006633; P:GO:0009853; P:GO:0010027; F:GO:0016887; F:GO:0019171; P:GO:0046034; P:GO:0046939	F:adenylate kinase activity; F:ATP binding; C:nucleus; C:mitochondrion; P:purine nucleobase metabolic process; P:fatty acid biosynthetic process; P:photorespiration; P:thylakoid membrane organization; F:ATPase activity; F:3-hydroxyacyl-[acyl-carrier-protein] dehydratase activity; P:ATP metabolic process; P:nucleotide phosphorylation	EC:2.7.4.3; EC:3.6.1.3; EC:4.2.1.59; EC:3.6.1.15	Adenylate kinase; Adenosinetriphosphatase; 3-hydroxyacyl-[acyl-carrier-protein] dehydratase; Nucleoside-triphosphate phosphatase	G3DSA:3.10.129.10 (GENE3D); IPR002539 (PFAM); PTHR43437 (PANTHER); PTHR43437:SF3 (PANTHER); cd03449 (CDD); IPR029069 (SUPERFAMILY)	no GO terms	no GO terms
HSK10228_c0_g1_i2	(R)-specific enoyl-CoA hydratase	533	20	2.2081e-89	87.76	12	F:GO:0004017; F:GO:0005524; C:GO:0005634; C:GO:0005739; P:GO:0006144; P:GO:0006633; P:GO:0009853; P:GO:0010027; F:GO:0016887; F:GO:0019171; P:GO:0046034; P:GO:0046939	F:adenylate kinase activity; F:ATP binding; C:nucleus; C:mitochondrion; P:purine nucleobase metabolic process; P:fatty acid biosynthetic process; P:photorespiration; P:thylakoid membrane organization; F:ATPase activity; F:3-hydroxyacyl-[acyl-carrier-protein] dehydratase activity; P:ATP metabolic process; P:nucleotide phosphorylation	EC:2.7.4.3; EC:3.6.1.3; EC:4.2.1.59; EC:3.6.1.15	Adenylate kinase; Adenosinetriphosphatase; 3-hydroxyacyl-[acyl-carrier-protein] dehydratase; Nucleoside-triphosphate phosphatase	G3DSA:3.10.129.10 (GENE3D); IPR002539 (PFAM); PTHR43437 (PANTHER); PTHR43437:SF3 (PANTHER); cd03449 (CDD); IPR029069 (SUPERFAMILY)	no GO terms	no GO terms
HSK10228_c0_g2_i1	---NA---	332									no IPS match	no IPS match	no IPS match
HSK10228_c1_g1_i1	---NA---	289									no IPS match	no IPS match	no IPS match
HSK10229_c0_g1_i1	protein NUCLEAR FUSION DEFECTIVE 4-like	1910	20	0	87.3	1	C:GO:0016021	C:integral component of membrane			G3DSA:1.20.1250.20 (GENE3D); G3DSA:1.20.1250.20 (GENE3D); IPR010658 (PFAM); PTHR21576 (PANTHER); PTHR21576:SF17 (PANTHER); IPR036259 (SUPERFAMILY)	no GO terms	no GO terms
HSK1023_c0_g1_i1	DNA replication ATP-dependent helicase/nuclease DNA2 isoform X1	363	20	8.10328e-74	94.88	5	F:GO:0004386; P:GO:0006308; F:GO:0017108; P:GO:0033567; F:GO:0043142	F:helicase activity; P:DNA catabolic process; F:5'-flap endonuclease activity; P:DNA replication, Okazaki fragment processing; F:single-stranded DNA-dependent ATPase activity	EC:3.1.30; EC:3.6.1.3; EC:3.1.21; EC:3.6.1.15	Acting on ester bonds; Adenosinetriphosphatase; Acting on ester bonds; Nucleoside-triphosphate phosphatase	G3DSA:3.40.50.300 (GENE3D); PF13086 (PFAM); IPR026851 (PTHR10887:PANTHER); PTHR10887 (PANTHER); IPR027417 (SUPERFAMILY)	F:GO:0017108; P:GO:0033567; F:GO:0043142	F:5'-flap endonuclease activity; P:DNA replication, Okazaki fragment processing; F:single-stranded DNA-dependent ATPase activity
HSK10230_c0_g1_i1	40S ribosomal protein S17-4	1017	20	2.48939e-14	80.83	4	F:GO:0003735; C:GO:0005840; P:GO:0006412; P:GO:0042254	F:structural constituent of ribosome; C:ribosome; P:translation; P:ribosome biogenesis			mobidb-lite (MOBIDB_LITE)	no GO terms	no GO terms
HSK10230_c0_g2_i1	DNA polymerase zeta processivity subunit	917	20	1.09731e-68	90.3	2	F:GO:0003677; C:GO:0016021	F:DNA binding; C:integral component of membrane			IPR036570 (G3DSA:3.30.900.GENE3D); PTHR11842 (PANTHER); PTHR11842:SF10 (PANTHER); IPR003511 (PROSITE_PROFILES); IPR036570 (SUPERFAMILY)	no GO terms	no GO terms
HSK10230_c0_g3_i1	DNA polymerase zeta processivity subunit	571	20	1.03565e-45	87.23						IPR036570 (G3DSA:3.30.900.GENE3D); IPR003511 (PFAM); PTHR11842:SF10 (PANTHER); PTHR11842 (PANTHER); IPR003511 (PROSITE_PROFILES); IPR036570 (SUPERFAMILY)	no GO terms	no GO terms
HSK10231_c0_g1_i1	bifunctional dethiobiotin synthetase/7,8-diamino-pelargonic acid aminotransferase, mitochondrial	1257	20	0	81.75	9	C:GO:0005739; P:GO:0006522; P:GO:0006531; P:GO:0006544; P:GO:0006563; P:GO:0006566; F:GO:0008453; F:GO:0030170; F:GO:0042802	C:mitochondrion; P:alanine metabolic process; P:aspartate metabolic process; P:glycine metabolic process; P:L-serine metabolic process; P:threonine metabolic process; F:alanine-glyoxylate transaminase activity; F:pyridoxal phosphate binding; F:identical protein binding	EC:2.6.1.44	Alanine--glyoxylate transaminase	PF13500 (PFAM); G3DSA:3.40.50.300 (GENE3D); IPR015422 (G3DSA:3.90.1150.GENE3D); PTHR42684 (PANTHER); PTHR42684:SF3 (PANTHER); IPR027417 (SUPERFAMILY)	F:GO:0003824	F:catalytic activity
HSK10232_c0_g1_i1	ribonuclease Z, chloroplastic	650	20	4.09464e-77	98.39	3	P:GO:0034414; F:GO:0042781; P:GO:0051252	P:tRNA 3'-trailer cleavage, endonucleolytic; F:3'-tRNA processing endoribonuclease activity; P:regulation of RNA metabolic process	EC:3.1.30; EC:3.1.26	Acting on ester bonds; Acting on ester bonds	IPR036866 (G3DSA:3.60.15.GENE3D); PTHR12553:SF43 (PANTHER); PTHR12553 (PANTHER); IPR036866 (SUPERFAMILY)	no GO terms	no GO terms
HSK10232_c0_g1_i2	ribonuclease Z, chloroplastic	1244	20	0	92.03	3	P:GO:0034414; F:GO:0042781; P:GO:0051252	P:tRNA 3'-trailer cleavage, endonucleolytic; F:3'-tRNA processing endoribonuclease activity; P:regulation of RNA metabolic process	EC:3.1.30; EC:3.1.26	Acting on ester bonds; Acting on ester bonds	IPR001279 (PFAM); IPR036866 (G3DSA:3.60.15.GENE3D); PTHR12553:SF43 (PANTHER); PTHR12553 (PANTHER); cd16272 (CDD); IPR036866 (SUPERFAMILY)	no GO terms	no GO terms
HSK10232_c0_g1_i3	ribonuclease Z, chloroplastic	393	20	8.32657e-11	92.71	1	F:GO:0016787	F:hydrolase activity			no IPS match	no IPS match	no IPS match
HSK10233_c0_g1_i1	chloroplast sensor kinase, chloroplastic isoform X2	378	20	4.41109e-81	88.57	1	P:GO:0007165	P:signal transduction			no IPS match	no IPS match	no IPS match
HSK10233_c0_g2_i1	chloroplast sensor kinase, chloroplastic isoform X1	1066	20	0	92.1	13	F:GO:0000155; P:GO:0000160; C:GO:0009365; C:GO:0009570; P:GO:0010468; F:GO:0016874; P:GO:0018106; P:GO:0023014; F:GO:0043621; P:GO:0046777; F:GO:0048038; P:GO:0051776; P:GO:0080005	F:phosphorelay sensor kinase activity; P:phosphorelay signal transduction system; C:protein histidine kinase complex; C:chloroplast stroma; P:regulation of gene expression; F:ligase activity; P:peptidyl-histidine phosphorylation; P:signal transduction by protein phosphorylation; F:protein self-association; P:protein autophosphorylation; F:quinone binding; P:detection of redox state; P:photosystem…	EC:2.7.13.3	Histidine kinase	IPR036890 (G3DSA:3.30.565.GENE3D); IPR003594 (PFAM); IPR036890 (SUPERFAMILY)	no GO terms	no GO terms
HSK10234_c0_g1_i1	prolyl 3-hydroxylase 1	376	20	1.37833e-34	91.09	4	F:GO:0005506; F:GO:0016705; F:GO:0031418; P:GO:0055114	F:iron ion binding; F:oxidoreductase activity, acting on paired donors, with incorporation or reduction of molecular oxygen; F:L-ascorbic acid binding; P:oxidation-reduction process			PTHR14049 (PANTHER); PTHR14049:SF9 (PANTHER)	no GO terms	no GO terms
HSK10234_c0_g1_i2	prolyl 3-hydroxylase 1 isoform X2	1023	20	0	86.07	5	F:GO:0005506; F:GO:0016705; F:GO:0031418; F:GO:0051213; P:GO:0055114	F:iron ion binding; F:oxidoreductase activity, acting on paired donors, with incorporation or reduction of molecular oxygen; F:L-ascorbic acid binding; F:dioxygenase activity; P:oxidation-reduction process			IPR005123 (PFAM); G3DSA:2.60.120.620 (GENE3D); PTHR14049:SF9 (PANTHER); PTHR14049 (PANTHER); IPR005123 (PROSITE_PROFILES)	F:GO:0016491; P:GO:0055114	F:oxidoreductase activity; P:oxidation-reduction process
HSK10234_c0_g1_i3	Oxidoreductase, putative isoform 1	1336	20	0	85.03	4	F:GO:0005506; F:GO:0016705; F:GO:0031418; P:GO:0055114	F:iron ion binding; F:oxidoreductase activity, acting on paired donors, with incorporation or reduction of molecular oxygen; F:L-ascorbic acid binding; P:oxidation-reduction process			IPR005123 (PFAM); G3DSA:2.60.120.620 (GENE3D); PTHR14049:SF9 (PANTHER); PTHR14049 (PANTHER); IPR005123 (PROSITE_PROFILES)	F:GO:0016491; P:GO:0055114	F:oxidoreductase activity; P:oxidation-reduction process
HSK10234_c0_g1_i4	Prolyl 3-hydroxylase 1	579	20	1.64767e-116	89.25	5	F:GO:0005506; F:GO:0016705; F:GO:0031418; F:GO:0051213; P:GO:0055114	F:iron ion binding; F:oxidoreductase activity, acting on paired donors, with incorporation or reduction of molecular oxygen; F:L-ascorbic acid binding; F:dioxygenase activity; P:oxidation-reduction process			IPR005123 (PFAM); G3DSA:2.60.120.620 (GENE3D); PTHR14049:SF9 (PANTHER); PTHR14049 (PANTHER)	F:GO:0016491; P:GO:0055114	F:oxidoreductase activity; P:oxidation-reduction process
HSK10235_c0_g1_i1	outer envelope pore protein 16-3, chloroplastic/mitochondrial	849	20	2.17779e-87	95.56	1	C:GO:0016021	C:integral component of membrane			IPR003397 (PFAM); PTHR14110 (PANTHER); PTHR14110:SF4 (PANTHER)	no GO terms	no GO terms
HSK10236_c0_g1_i1	---NA---	702									no IPS match	no IPS match	no IPS match
HSK10236_c0_g1_i2	---NA---	654									no IPS match	no IPS match	no IPS match
HSK10237_c0_g1_i1	catalytic, putative	527	20	1.36282e-55	92.22	1	F:GO:0016787	F:hydrolase activity			PTHR42886 (PANTHER); PTHR42886:SF10 (PANTHER)	no GO terms	no GO terms
HSK10237_c0_g1_i2	Alpha/beta-Hydrolases superfamily protein	526	20	4.10677e-125	93.34	1	F:GO:0016787	F:hydrolase activity			IPR029058 (G3DSA:3.40.50.GENE3D); PTHR42886:SF10 (PANTHER); PTHR42886 (PANTHER); IPR029058 (SUPERFAMILY)	no GO terms	no GO terms
HSK10237_c0_g1_i3	Alpha/beta-Hydrolases superfamily protein	540	20	6.41439e-91	92.93	1	F:GO:0016787	F:hydrolase activity			PTHR42886 (PANTHER); PTHR42886:SF10 (PANTHER)	no GO terms	no GO terms
HSK10237_c0_g1_i4	hypothetical protein CISIN_1g0207411mg, partial	291	20	1.42238e-56	94.66						PTHR42886:SF10 (PANTHER); PTHR42886 (PANTHER)	no GO terms	no GO terms
HSK10237_c0_g1_i5	hypothetical protein CISIN_1g0207411mg, partial	305	20	5.282e-23	96.03						PTHR42886:SF10 (PANTHER); PTHR42886 (PANTHER)	no GO terms	no GO terms
HSK10238_c0_g1_i1	serine/threonine-protein kinase ATG1a isoform X2	866	20	1.21262e-115	78.75	3	F:GO:0004672; F:GO:0005524; P:GO:0006468	F:protein kinase activity; F:ATP binding; P:protein phosphorylation			mobidb-lite (MOBIDB_LITE); PTHR24348:SF25 (PANTHER); PTHR24348 (PANTHER)	no GO terms	no GO terms
HSK10239_c0_g1_i1	---NA---	498									no IPS match	no IPS match	no IPS match
HSK10239_c0_g1_i2	---NA---	482									no IPS match	no IPS match	no IPS match
HSK10239_c0_g1_i3	---NA---	411									no IPS match	no IPS match	no IPS match
HSK1024_c0_g1_i1	histone-lysine N-methyltransferase, H3 lysine-79 specific isoform X1	638	20	1.8374e-116	67.35						mobidb-lite (MOBIDB_LITE); mobidb-lite (MOBIDB_LITE); mobidb-lite (MOBIDB_LITE); PTHR34282 (PANTHER); PTHR34282:SF1 (PANTHER)	no GO terms	no GO terms
HSK10240_c0_g1_i1	histidine-containing phosphotransfer protein 5-like	997	20	1.06949e-136	94.41	9	P:GO:0000160; C:GO:0005634; C:GO:0005737; P:GO:0009736; F:GO:0009927; P:GO:0016310; F:GO:0032440; F:GO:0043424; P:GO:0055114	P:phosphorelay signal transduction system; C:nucleus; C:cytoplasm; P:cytokinin-activated signaling pathway; F:histidine phosphotransfer kinase activity; P:phosphorylation; F:2-alkenal reductase [NAD(P)] activity; F:protein histidine kinase binding; P:oxidation-reduction process	EC:1.3.1.74	2-alkenal reductase (NAD(P)(+))	IPR036641 (G3DSA:1.20.120.GENE3D); IPR008207 (PFAM); PTHR28242:SF24 (PANTHER); PTHR28242 (PANTHER); IPR008207 (PROSITE_PROFILES); IPR008207 (CDD); IPR036641 (SUPERFAMILY)	P:GO:0000160; F:GO:0004871	P:phosphorelay signal transduction system; F:signal transducer activity
HSK10241_c0_g1_i1	peptidyl-prolyl cis-trans isomerase CYP18-2	912	20	1.94343e-105	93.44	3	P:GO:0000413; F:GO:0003755; P:GO:0006457	P:protein peptidyl-prolyl isomerization; F:peptidyl-prolyl cis-trans isomerase activity; P:protein folding	EC:5.2.1.8	Peptidylprolyl isomerase	IPR002130 (PRINTS); IPR029000 (G3DSA:2.40.100.GENE3D); IPR024936 (PIRSF); IPR002130 (PFAM); PTHR11071:SF213 (PANTHER); IPR024936 (PANTHER); IPR002130 (PROSITE_PROFILES); IPR029000 (SUPERFAMILY)	P:GO:0000413; F:GO:0003755	P:protein peptidyl-prolyl isomerization; F:peptidyl-prolyl cis-trans isomerase activity
HSK10242_c0_g1_i1	cysteine proteinase inhibitor 5-like	464	20	2.29739e-72	80.97	3	F:GO:0002020; F:GO:0004869; P:GO:2000117	F:protease binding; F:cysteine-type endopeptidase inhibitor activity; P:negative regulation of cysteine-type endopeptidase activity			no IPS match	no IPS match	no IPS match
HSK10243_c0_g1_i1	E3 ubiquitin-protein ligase HUWE1, putative	1047	20	9.88047e-160	74.2	1	F:GO:0005515	F:protein binding			G3DSA:2.20.70.10 (GENE3D); mobidb-lite (MOBIDB_LITE); PTHR14791 (PANTHER); PTHR14791:SF36 (PANTHER); IPR036020 (SUPERFAMILY)	F:GO:0005515	F:protein binding
HSK10244_c0_g1_i1	U3 snoRNP-associated protein-like EMB2271	1948	20	0	85.81	4	F:GO:0005515; P:GO:0006364; F:GO:0030515; C:GO:0032040	F:protein binding; P:rRNA processing; F:snoRNA binding; C:small-subunit processome			IPR020472 (PRINTS); IPR001680 (PFAM); IPR015943 (G3DSA:2.130.10.GENE3D); mobidb-lite (MOBIDB_LITE); PTHR19865:SF0 (PANTHER); PTHR19865 (PANTHER); IPR001680 (PROSITE_PROFILES); IPR001680 (PROSITE_PROFILES); IPR017986 (PROSITE_PROFILES); IPR001680 (PROSITE_PROFILES); cd00200 (CDD); IPR036322 (SUPERFAMILY)	F:GO:0005515	F:protein binding
HSK10245_c0_g1_i1	hypothetical protein CUMW_033960	820	1	2.05068e-10	82.05						no IPS match	no IPS match	no IPS match
HSK10246_c0_g1_i1	---NA---	265									no IPS match	no IPS match	no IPS match
HSK10246_c0_g2_i1	pentatricopeptide repeat-containing protein At3g48810	687	20	9.64615e-93	83.69	1	F:GO:0005515	F:protein binding			IPR002885 (TIGRFAM); IPR002885 (PFAM); IPR002885 (PFAM); IPR011990 (G3DSA:1.25.40.GENE3D); PTHR24015:SF269 (PANTHER); PTHR24015 (PANTHER); IPR002885 (PROSITE_PROFILES); IPR002885 (PROSITE_PROFILES); IPR002885 (PROSITE_PROFILES); IPR002885 (PROSITE_PROFILES)	F:GO:0005515	F:protein binding
HSK10247_c0_g1_i1	heparan-alpha-glucosaminide N-acetyltransferase	1609	20	0	86.21	2	C:GO:0016021; F:GO:0016746	C:integral component of membrane; F:transferase activity, transferring acyl groups			IPR012429 (PFAM); mobidb-lite (MOBIDB_LITE); PTHR31061:SF20 (PANTHER); PTHR31061 (PANTHER)	no GO terms	no GO terms
HSK10247_c0_g1_i2	heparan-alpha-glucosaminide N-acetyltransferase	1527	20	0	88.96	2	C:GO:0016021; F:GO:0016746	C:integral component of membrane; F:transferase activity, transferring acyl groups			PTHR31061 (PANTHER); PTHR31061:SF20 (PANTHER)	no GO terms	no GO terms
HSK10247_c0_g1_i3	heparan-alpha-glucosaminide N-acetyltransferase isoform X1	860	20	1.59817e-131	83.18	2	C:GO:0016021; F:GO:0016740	C:integral component of membrane; F:transferase activity			IPR012429 (PFAM); mobidb-lite (MOBIDB_LITE); PTHR31061:SF20 (PANTHER); PTHR31061 (PANTHER)	no GO terms	no GO terms
HSK10248_c0_g1_i1	CLAVATA3/ESR (CLE)-related protein 12-like	847	20	1.50814e-45	71.33	1	C:GO:0016021	C:integral component of membrane			mobidb-lite (MOBIDB_LITE); PTHR34359 (PANTHER); PTHR34359:SF5 (PANTHER)	no GO terms	no GO terms
HSK10249_c0_g1_i1	Putative COX1/OXI3 intron 2 protein	521	20	3.37684e-115	87.52	4	F:GO:0003964; C:GO:0005739; P:GO:0006278; P:GO:0006397	F:RNA-directed DNA polymerase activity; C:mitochondrion; P:RNA-dependent DNA biosynthetic process; P:mRNA processing	EC:2.7.7.49	RNA-directed DNA polymerase	PTHR33642:SF1 (PANTHER); PTHR33642 (PANTHER); IPR000477 (PROSITE_PROFILES)	no GO terms	no GO terms
HSK10249_c0_g2_i1	RNA-directed DNA polymerase (reverse transcriptase)	511	20	1.61345e-66	68.69	4	C:GO:0005739; P:GO:0006397; F:GO:0016740; F:GO:0016787	C:mitochondrion; P:mRNA processing; F:transferase activity; F:hydrolase activity			PTHR33642:SF1 (PANTHER); PTHR33642 (PANTHER)	no GO terms	no GO terms
HSK10249_c0_g3_i1	nuclear intron maturase 3, mitochondrial	226	20	1.43782e-44	88.02	5	F:GO:0003964; P:GO:0006278; P:GO:0006397; F:GO:0008168; P:GO:0032259	F:RNA-directed DNA polymerase activity; P:RNA-dependent DNA biosynthetic process; P:mRNA processing; F:methyltransferase activity; P:methylation	EC:2.7.7.49	RNA-directed DNA polymerase	PTHR33642:SF1 (PANTHER); PTHR33642 (PANTHER)	no GO terms	no GO terms
HSK1025_c0_g1_i1	---NA---	263									no IPS match	no IPS match	no IPS match
HSK10250_c0_g1_i1	60S ribosomal protein L35-like	592	20	4.15885e-80	98.34	4	F:GO:0003735; C:GO:0005840; P:GO:0006412; P:GO:0042254	F:structural constituent of ribosome; C:ribosome; P:translation; P:ribosome biogenesis			G3DSA:1.10.20.90 (GENE3D); IPR001854 (PFAM); G3DSA:1.10.287.310 (GENE3D); IPR001854 (TIGRFAM); PTHR13872:SF36 (PANTHER); PTHR13872 (PANTHER); IPR001854 (HAMAP); cd00427 (CDD); IPR036049 (SUPERFAMILY)	F:GO:0003735; C:GO:0005622; C:GO:0005840; P:GO:0006412	F:structural constituent of ribosome; C:intracellular; C:ribosome; P:translation
HSK10251_c0_g1_i1	GDSL esterase/lipase CPRD49-like	549	20	4.46085e-106	87.74	1	F:GO:0016788	F:hydrolase activity, acting on ester bonds			no IPS match	no IPS match	no IPS match
HSK10252_c0_g1_i1	putative RING-H2 finger protein ATL69	722	20	9.58165e-82	74.33	2	C:GO:0016021; P:GO:0044267	C:integral component of membrane; P:cellular protein metabolic process			IPR001841 (PFAM); IPR013083 (G3DSA:3.30.40.GENE3D); PTHR14155:SF157 (PANTHER); PTHR14155 (PANTHER); IPR001841 (PROSITE_PROFILES); cd16454 (CDD); SSF57850 (SUPERFAMILY)	no GO terms	no GO terms
HSK10253_c0_g1_i1	tropinone reductase-like 3	1047	20	1.56378e-161	91.21	2	F:GO:0016491; P:GO:0055114	F:oxidoreductase activity; P:oxidation-reduction process			IPR002347 (PRINTS); IPR002347 (PRINTS); PF13561 (PFAM); G3DSA:3.40.50.720 (GENE3D); PTHR43943:SF2 (PANTHER); PTHR43943 (PANTHER); IPR036291 (SUPERFAMILY)	no GO terms	no GO terms
HSK10254_c0_g1_i1	anaphase-promoting complex subunit 5 isoform X1	403	20	1.6774e-84	93.01	1	C:GO:0005680	C:anaphase-promoting complex			no IPS match	no IPS match	no IPS match
HSK10254_c0_g2_i1	anaphase-promoting complex subunit 5 isoform X1	1080	20	0	90.96	1	C:GO:0005680	C:anaphase-promoting complex			IPR026000 (PFAM); IPR037679 (PANTHER); PTHR12830:SF9 (PANTHER)	C:GO:0005680	C:anaphase-promoting complex
HSK10255_c0_g1_i1	---NA---	212									no IPS match	no IPS match	no IPS match
HSK10255_c0_g2_i1	---NA---	351									no IPS match	no IPS match	no IPS match
HSK10256_c0_g1_i1	dehydrogenase/reductase SDR family member 7	1295	20	0	92.5	2	F:GO:0016491; P:GO:0055114	F:oxidoreductase activity; P:oxidation-reduction process			IPR002347 (PRINTS); G3DSA:3.40.50.720 (GENE3D); IPR002347 (PFAM); PTHR45274 (PANTHER); IPR036291 (SUPERFAMILY)	no GO terms	no GO terms
HSK10256_c0_g1_i2	dehydrogenase/reductase SDR family member 7	694	20	1.40516e-75	90.15	2	F:GO:0016491; P:GO:0055114	F:oxidoreductase activity; P:oxidation-reduction process			PTHR45274 (PANTHER); IPR036291 (SUPERFAMILY)	no GO terms	no GO terms
HSK10256_c0_g1_i3	dehydrogenase/reductase SDR family member 7	1263	20	0	92.5	2	F:GO:0016491; P:GO:0055114	F:oxidoreductase activity; P:oxidation-reduction process			IPR002347 (PRINTS); G3DSA:3.40.50.720 (GENE3D); IPR002347 (PFAM); PTHR45274 (PANTHER); IPR036291 (SUPERFAMILY)	no GO terms	no GO terms
HSK10256_c0_g1_i4	dehydrogenase/reductase SDR family member 7	662	20	9.68904e-76	90.15	2	F:GO:0016491; P:GO:0055114	F:oxidoreductase activity; P:oxidation-reduction process			PTHR45274 (PANTHER); IPR036291 (SUPERFAMILY)	no GO terms	no GO terms
HSK10256_c0_g1_i5	---NA---	413									no IPS match	no IPS match	no IPS match
HSK10257_c0_g1_i1	glutathionyl-hydroquinone reductase YqjG	1406	20	0	85.02	5	F:GO:0004364; F:GO:0005515; C:GO:0005737; P:GO:0006749; P:GO:0006803	F:glutathione transferase activity; F:protein binding; C:cytoplasm; P:glutathione metabolic process; P:obsolete glutathione conjugation reaction	EC:2.5.1.18	Glutathione transferase	G3DSA:1.20.1050.10 (GENE3D); PF13410 (PFAM); G3DSA:3.40.30.130 (GENE3D); IPR004045 (PFAM); mobidb-lite (MOBIDB_LITE); PTHR32419:SF21 (PANTHER); IPR016639 (PANTHER); IPR010987 (PROSITE_PROFILES); cd03190 (CDD); IPR036249 (SUPERFAMILY); IPR036282 (SUPERFAMILY)	F:GO:0004364; F:GO:0005515	F:glutathione transferase activity; F:protein binding
HSK10258_c0_g1_i1	PREDICTED: uncharacterized protein LOC107176104	327	11	2.51739e-06	91.25						no IPS match	no IPS match	no IPS match
HSK10258_c0_g2_i1	---NA---	240									no IPS match	no IPS match	no IPS match
HSK10259_c0_g1_i1	probable enoyl-CoA hydratase 1, peroxisomal	1218	20	0	92.55	3	C:GO:0005777; P:GO:0008152; F:GO:0016853	C:peroxisome; P:metabolic process; F:isomerase activity			IPR001753 (PFAM); G3DSA:3.90.226.10 (GENE3D); PTHR43802 (PANTHER); cd06558 (CDD); IPR029045 (SUPERFAMILY)	F:GO:0003824; P:GO:0008152	F:catalytic activity; P:metabolic process
HSK10259_c0_g1_i2	probable enoyl-CoA hydratase 1, peroxisomal	666	20	3.95658e-99	93.59	3	C:GO:0005777; P:GO:0008152; F:GO:0016853	C:peroxisome; P:metabolic process; F:isomerase activity			G3DSA:3.90.226.10 (GENE3D); IPR001753 (PFAM); PTHR43802 (PANTHER); cd06558 (CDD); IPR029045 (SUPERFAMILY)	F:GO:0003824; P:GO:0008152	F:catalytic activity; P:metabolic process
HSK1026_c0_g1_i1	kinesin-like protein KIN-12E	388	20	6.20333e-81	67.26	6	F:GO:0003777; F:GO:0005524; C:GO:0005874; P:GO:0007018; F:GO:0008017; C:GO:0045298	F:microtubule motor activity; F:ATP binding; C:microtubule; P:microtubule-based movement; F:microtubule binding; C:tubulin complex	EC:3.6.1.15	Nucleoside-triphosphate phosphatase	mobidb-lite (MOBIDB_LITE)	no GO terms	no GO terms
HSK1026_c0_g2_i1	kinesin-like protein KIN-12E	226	19	5.29497e-22	79.77	6	F:GO:0003777; F:GO:0005524; C:GO:0005874; P:GO:0007018; F:GO:0008017; C:GO:0045298	F:microtubule motor activity; F:ATP binding; C:microtubule; P:microtubule-based movement; F:microtubule binding; C:tubulin complex	EC:3.6.1.15	Nucleoside-triphosphate phosphatase	PTHR24115:SF598 (PANTHER); IPR027640 (PANTHER)	F:GO:0003777; P:GO:0007018	F:microtubule motor activity; P:microtubule-based movement
HSK10260_c0_g1_i1	methyltransferase-like protein 6 isoform X1	1132	20	0	84.34	2	F:GO:0008168; P:GO:0032259	F:methyltransferase activity; P:methylation			IPR026113 (PIRSF); PF13489 (PFAM); IPR026113 (PANTHER); PTHR22809:SF5 (PANTHER); cd02440 (CDD); IPR029063 (SUPERFAMILY)	no GO terms	no GO terms
HSK10261_c0_g1_i1	ethylene-responsive transcription factor 4-like	1402	20	2.02721e-111	74.71	6	F:GO:0003677; F:GO:0003700; C:GO:0005634; C:GO:0005667; P:GO:0006355; P:GO:0006355	F:DNA binding; F:DNA binding transcription factor activity; C:nucleus; C:transcription factor complex; P:regulation of transcription, DNA-templated; P:regulation of transcription, DNA-templated			IPR001471 (PRINTS); IPR017392 (PIRSF); IPR001471 (PFAM); IPR036955 (G3DSA:3.30.730.GENE3D); mobidb-lite (MOBIDB_LITE); PTHR31677:SF17 (PANTHER); PTHR31677 (PANTHER); IPR001471 (PROSITE_PROFILES); IPR001471 (CDD); IPR016177 (SUPERFAMILY)	F:GO:0003677; F:GO:0003700; P:GO:0006355	F:DNA binding; F:DNA binding transcription factor activity; P:regulation of transcription, DNA-templated
HSK10262_c0_g1_i1	---NA---	423									no IPS match	no IPS match	no IPS match
HSK10263_c0_g1_i1	transcription factor bHLH68-like isoform X1	862	20	1.88205e-150	69.69	3	F:GO:0003677; P:GO:0006351; F:GO:0046983	F:DNA binding; P:transcription, DNA-templated; F:protein dimerization activity			no IPS match	no IPS match	no IPS match
HSK10263_c0_g1_i2	transcription factor bHLH68-like isoform X1	910	20	3.5209e-150	69.69	3	F:GO:0003677; P:GO:0006351; F:GO:0046983	F:DNA binding; P:transcription, DNA-templated; F:protein dimerization activity			no IPS match	no IPS match	no IPS match
HSK10264_c0_g1_i1	G-type lectin S-receptor-like serine/threonine-protein kinase SD2-5	1924	20	0	83.43	7	F:GO:0004674; F:GO:0005524; C:GO:0005886; P:GO:0006468; P:GO:0009069; C:GO:0016021; F:GO:0030246	F:protein serine/threonine kinase activity; F:ATP binding; C:plasma membrane; P:protein phosphorylation; P:serine family amino acid metabolic process; C:integral component of membrane; F:carbohydrate binding	EC:2.7.11	Transferring phosphorus-containing groups	IPR000719 (PFAM); IPR001480 (PFAM); G3DSA:1.10.510.10 (GENE3D); G3DSA:3.30.200.20 (GENE3D); IPR036426 (G3DSA:2.90.10.GENE3D); mobidb-lite (MOBIDB_LITE); PTHR27002 (PANTHER); PTHR27002:SF358 (PANTHER); IPR001480 (PROSITE_PROFILES); IPR000719 (PROSITE_PROFILES); cd14066 (CDD); IPR011009 (SUPERFAMILY); IPR036426 (SUPERFAMILY)	F:GO:0004672; F:GO:0005524; P:GO:0006468	F:protein kinase activity; F:ATP binding; P:protein phosphorylation
HSK10265_c0_g1_i1	hypothetical protein CUMW_166480	662	1	3.44277e-13	89.47						no IPS match	no IPS match	no IPS match
HSK10265_c0_g1_i2	---NA---	489									no IPS match	no IPS match	no IPS match
HSK10265_c0_g1_i3	hypothetical protein CUMW_166480	298	1	1.32762e-14	89.47						no IPS match	no IPS match	no IPS match
HSK10266_c0_g1_i1	probable histone chaperone ASF1A	1042	20	4.95589e-109	96.77	2	C:GO:0005634; P:GO:0006333	C:nucleus; P:chromatin assembly or disassembly			IPR006818 (PFAM); IPR036747 (G3DSA:2.60.40.GENE3D); mobidb-lite (MOBIDB_LITE); IPR006818 (PANTHER); PTHR12040:SF0 (PANTHER); IPR036747 (SUPERFAMILY)	C:GO:0005634; P:GO:0006333	C:nucleus; P:chromatin assembly or disassembly
HSK10266_c0_g1_i2	probable histone chaperone ASF1A	1050	20	5.32217e-109	96.77	2	C:GO:0005634; P:GO:0006333	C:nucleus; P:chromatin assembly or disassembly			IPR006818 (PFAM); IPR036747 (G3DSA:2.60.40.GENE3D); mobidb-lite (MOBIDB_LITE); IPR006818 (PANTHER); PTHR12040:SF0 (PANTHER); IPR036747 (SUPERFAMILY)	C:GO:0005634; P:GO:0006333	C:nucleus; P:chromatin assembly or disassembly
HSK10267_c0_g1_i1	---NA---	539									no IPS match	no IPS match	no IPS match
HSK10268_c0_g1_i1	---NA---	201									no IPS match	no IPS match	no IPS match
HSK10268_c0_g2_i1	hypothetical protein CISIN_1g005273mg	527	20	1.95056e-56	89.69	3	C:GO:0009507; P:GO:0015979; F:GO:0071949	C:chloroplast; P:photosynthesis; F:FAD binding			no IPS match	no IPS match	no IPS match
HSK10268_c0_g2_i2	PREDICTED: uncharacterized protein Cbei_0202 isoform X2	512	20	1.96682e-68	91.48	3	C:GO:0009507; P:GO:0015979; F:GO:0071949	C:chloroplast; P:photosynthesis; F:FAD binding			no IPS match	no IPS match	no IPS match
HSK10269_c0_g1_i1	tetraspanin-6	1086	20	0	95.01	1	C:GO:0016021	C:integral component of membrane			IPR000301 (PRINTS); IPR018499 (PFAM); PTHR32191 (PANTHER); PTHR32191:SF40 (PANTHER)	C:GO:0016021	C:integral component of membrane
HSK10269_c0_g1_i2	tetraspanin-6	206	20	2.29488e-34	95.61	2	C:GO:0016021; P:GO:0035265	C:integral component of membrane; P:organ growth			PTHR32191 (PANTHER); PTHR32191:SF40 (PANTHER)	no GO terms	no GO terms
HSK10269_c1_g1_i1	---NA---	374									no IPS match	no IPS match	no IPS match
HSK1027_c0_g1_i1	---NA---	242									no IPS match	no IPS match	no IPS match
HSK10270_c0_g1_i1	chlorophyll a-b binding protein 8, chloroplastic	1094	20	9.85365e-177	94.91	7	C:GO:0009522; C:GO:0009523; C:GO:0009535; P:GO:0009765; C:GO:0016021; F:GO:0016168; P:GO:0018298	C:photosystem I; C:photosystem II; C:chloroplast thylakoid membrane; P:photosynthesis, light harvesting; C:integral component of membrane; F:chlorophyll binding; P:protein-chromophore linkage			IPR022796 (PFAM); IPR023329 (G3DSA:1.10.3460.GENE3D); mobidb-lite (MOBIDB_LITE); IPR001344 (PANTHER); PTHR21649:SF14 (PANTHER); SSF103511 (SUPERFAMILY)	P:GO:0009765; C:GO:0016020	P:photosynthesis, light harvesting; C:membrane
HSK10271_c0_g1_i1	Polyamine-modulated factor 1-binding protein 1	616	20	7.88029e-16	84.85						no IPS match	no IPS match	no IPS match
HSK10271_c0_g1_i2	Polyamine-modulated factor 1-binding protein 1	668	20	7.50434e-40	84.55						PTHR36800 (PANTHER)	no GO terms	no GO terms
HSK10272_c0_g1_i1	jacalin-related lectin 3-like isoform X1	2135	20	0	85.98	1	F:GO:0030246	F:carbohydrate binding			IPR001229 (PFAM); IPR036404 (G3DSA:2.100.10.GENE3D); mobidb-lite (MOBIDB_LITE); mobidb-lite (MOBIDB_LITE); IPR001229 (PROSITE_PROFILES); IPR001229 (PROSITE_PROFILES); IPR001229 (PROSITE_PROFILES); IPR033734 (CDD); IPR033734 (CDD); IPR033734 (CDD); IPR036404 (SUPERFAMILY); IPR036404 (SUPERFAMILY); IPR036404 (SUPERFAMILY)	F:GO:0030246	F:carbohydrate binding
HSK10272_c0_g1_i2	jacalin-related lectin 3-like isoform X2	863	20	5.70843e-153	85.71	1	F:GO:0030246	F:carbohydrate binding			IPR001229 (PFAM); IPR036404 (G3DSA:2.100.10.GENE3D); mobidb-lite (MOBIDB_LITE); mobidb-lite (MOBIDB_LITE); PTHR45172 (PANTHER); IPR001229 (PROSITE_PROFILES); IPR033734 (CDD); IPR036404 (SUPERFAMILY)	F:GO:0030246	F:carbohydrate binding
HSK10273_c0_g1_i1	UPF0553 protein-like	1530	20	0	94.2	2	P:GO:0006400; C:GO:0016021	P:tRNA modification; C:integral component of membrane			IPR019438 (PFAM); IPR019438 (PANTHER)	no GO terms	no GO terms
HSK10273_c0_g2_i1	---NA---	213									no IPS match	no IPS match	no IPS match
HSK10274_c0_g1_i1	---NA---	1251									no IPS match	no IPS match	no IPS match
HSK10275_c0_g1_i1	protein COFACTOR ASSEMBLY OF COMPLEX C SUBUNIT B CCB4, chloroplastic isoform X1	889	20	1.50965e-116	88.2	1	C:GO:0016021	C:integral component of membrane			IPR021325 (PFAM); PTHR34943 (PANTHER); PTHR34943:SF2 (PANTHER)	no GO terms	no GO terms
HSK10275_c0_g1_i2	protein COFACTOR ASSEMBLY OF COMPLEX C SUBUNIT B CCB4, chloroplastic isoform X1	867	4	1.76678e-09	98.21	1	C:GO:0016021	C:integral component of membrane			no IPS match	no IPS match	no IPS match
HSK10276_c0_g1_i1	mitochondrial import inner membrane translocase subunit TIM23-2	566	20	3.69885e-106	86.53	3	C:GO:0005744; P:GO:0030150; C:GO:0031305	C:mitochondrial inner membrane presequence translocase complex; P:protein import into mitochondrial matrix; C:integral component of mitochondrial inner membrane			IPR003397 (PFAM); PTHR15371:SF15 (PANTHER); PTHR15371 (PANTHER)	no GO terms	no GO terms
HSK10277_c0_g1_i1	WAT1-related protein At3g28050-like	1235	20	0	85.32	3	C:GO:0016021; F:GO:0022857; P:GO:0055085	C:integral component of membrane; F:transmembrane transporter activity; P:transmembrane transport			IPR000620 (PFAM); IPR030184 (PANTHER); PTHR31218:SF42 (PANTHER); SSF103481 (SUPERFAMILY); SSF103481 (SUPERFAMILY)	C:GO:0016020; C:GO:0016021; F:GO:0022857	C:membrane; C:integral component of membrane; F:transmembrane transporter activity
HSK10278_c0_g1_i1	two-component response regulator ARR8-like	1046	20	1.85255e-120	83.16	2	P:GO:0000160; C:GO:0005622	P:phosphorelay signal transduction system; C:intracellular			IPR001789 (PFAM); G3DSA:3.40.50.2300 (GENE3D); PTHR43874 (PANTHER); PTHR43874 (PANTHER); PTHR43874:SF26 (PANTHER); PTHR43874:SF26 (PANTHER); IPR001789 (PROSITE_PROFILES); IPR001789 (CDD); IPR011006 (SUPERFAMILY)	P:GO:0000160	P:phosphorelay signal transduction system
HSK10278_c0_g1_i2	two-component response regulator ARR8-like	689	20	2.81831e-49	92.71	2	P:GO:0000160; C:GO:0005622	P:phosphorelay signal transduction system; C:intracellular			PTHR43874:SF26 (PANTHER); PTHR43874 (PANTHER); PTHR43874:SF26 (PANTHER); PTHR43874 (PANTHER)	no GO terms	no GO terms
HSK10278_c0_g1_i3	two-component response regulator ARR8-like	941	20	1.59902e-87	67.75	2	P:GO:0000160; C:GO:0005622	P:phosphorelay signal transduction system; C:intracellular			G3DSA:3.40.50.2300 (GENE3D); IPR001789 (PFAM); PTHR43874 (PANTHER); PTHR43874:SF26 (PANTHER); PTHR43874 (PANTHER); PTHR43874:SF26 (PANTHER); IPR001789 (PROSITE_PROFILES); IPR001789 (CDD); IPR011006 (SUPERFAMILY)	P:GO:0000160	P:phosphorelay signal transduction system
HSK10279_c0_g1_i1	uncharacterized CRM domain-containing protein At3g25440, chloroplastic isoform X1	1500	20	0	87.65	2	F:GO:0003723; C:GO:0016021	F:RNA binding; C:integral component of membrane			IPR035920 (G3DSA:3.30.110.GENE3D); IPR001890 (PFAM); mobidb-lite (MOBIDB_LITE); PTHR31426:SF5 (PANTHER); PTHR31426 (PANTHER); IPR001890 (PROSITE_PROFILES); IPR035920 (SUPERFAMILY)	F:GO:0003723	F:RNA binding
HSK10279_c0_g1_i2	uncharacterized CRM domain-containing protein At3g25440, chloroplastic isoform X1	1478	20	0	89.9	3	F:GO:0003723; F:GO:0005509; C:GO:0016021	F:RNA binding; F:calcium ion binding; C:integral component of membrane			IPR001890 (PFAM); IPR035920 (G3DSA:3.30.110.GENE3D); mobidb-lite (MOBIDB_LITE); PTHR31426:SF5 (PANTHER); PTHR31426 (PANTHER); IPR001890 (PROSITE_PROFILES); IPR035920 (SUPERFAMILY)	F:GO:0003723	F:RNA binding
HSK10280_c0_g1_i1	hypothetical protein CICLE_v10003143mg	876	20	3.42267e-50	86.93						PTHR36002 (PANTHER)	no GO terms	no GO terms
HSK10281_c0_g1_i1	U11/U12 small nuclear ribonucleoprotein 65 kDa protein-like isoform X2	778	20	3.53255e-139	83.95	5	P:GO:0000398; C:GO:0005689; P:GO:0010229; F:GO:0030626; F:GO:0097157	P:mRNA splicing, via spliceosome; C:U12-type spliceosomal complex; P:inflorescence development; F:U12 snRNA binding; F:pre-mRNA intronic binding			IPR012677 (G3DSA:3.30.70.GENE3D); IPR000504 (PFAM); PTHR16105:SF0 (PANTHER); PTHR16105 (PANTHER); IPR000504 (PROSITE_PROFILES); IPR035979 (SUPERFAMILY)	F:GO:0003676	F:nucleic acid binding
HSK10281_c0_g1_i2	RNA recognition motif	496	20	1.04774e-75	86.27	5	P:GO:0000398; C:GO:0005634; P:GO:0010229; F:GO:0030626; F:GO:0097157	P:mRNA splicing, via spliceosome; C:nucleus; P:inflorescence development; F:U12 snRNA binding; F:pre-mRNA intronic binding			IPR012677 (G3DSA:3.30.70.GENE3D); IPR000504 (PFAM); PTHR16105 (PANTHER); PTHR16105:SF0 (PANTHER); PTHR16105 (PANTHER); IPR000504 (PROSITE_PROFILES); IPR035979 (SUPERFAMILY)	F:GO:0003676	F:nucleic acid binding
HSK10282_c0_g1_i1	transcription factor MYB41-like	363	20	7.92397e-86	94.88	7	F:GO:0000981; F:GO:0001135; C:GO:0005634; P:GO:0006357; P:GO:0030154; F:GO:0043565; F:GO:0044212	F:RNA polymerase II transcription factor activity, sequence-specific DNA binding; F:transcription factor activity, RNA polymerase II transcription factor recruiting; C:nucleus; P:regulation of transcription by RNA polymerase II; P:cell differentiation; F:sequence-specific DNA binding; F:transcription regulatory region DNA binding			no IPS match	no IPS match	no IPS match
HSK10282_c0_g2_i1	---NA---	474									no IPS match	no IPS match	no IPS match
HSK10283_c0_g1_i1	protein POLLENLESS 3-LIKE 1-like	1419	20	0	69.25	1	F:GO:0005515	F:protein binding			PF14559 (PFAM); IPR011990 (G3DSA:1.25.40.GENE3D); mobidb-lite (MOBIDB_LITE); PTHR36326:SF4 (PANTHER); PTHR36326 (PANTHER); IPR013026 (PROSITE_PROFILES); IPR019734 (PROSITE_PROFILES); IPR011990 (SUPERFAMILY)	F:GO:0005515	F:protein binding
HSK10284_c0_g1_i1	hypothetical protein CICLE_v10013189mg	377	1	4.90242e-20	100	3	C:GO:0005750; P:GO:0006122; C:GO:0016021	C:mitochondrial respiratory chain complex III; P:mitochondrial electron transport, ubiquinol to cytochrome c; C:integral component of membrane			no IPS match	no IPS match	no IPS match
HSK10285_c0_g1_i1	---NA---	548									no IPS match	no IPS match	no IPS match
HSK10286_c0_g1_i1	reticulon-like protein B9	943	20	2.96087e-140	77.61	2	C:GO:0005789; C:GO:0016021	C:endoplasmic reticulum membrane; C:integral component of membrane			IPR003388 (PFAM); mobidb-lite (MOBIDB_LITE); PTHR10994 (PANTHER); PTHR10994:SF85 (PANTHER); IPR003388 (PROSITE_PROFILES)	no GO terms	no GO terms
HSK10287_c0_g1_i1	pentatricopeptide repeat-containing protein At3g04130, mitochondrial	754	20	1.97538e-76	88.56						no IPS match	no IPS match	no IPS match
HSK10287_c0_g2_i1	pentatricopeptide repeat-containing protein At3g04130, mitochondrial	1395	20	0	80.93	6	F:GO:0003723; F:GO:0004519; F:GO:0005515; P:GO:0009451; C:GO:0043231; P:GO:0090305	F:RNA binding; F:endonuclease activity; F:protein binding; P:RNA modification; C:intracellular membrane-bounded organelle; P:nucleic acid phosphodiester bond hydrolysis			IPR011990 (G3DSA:1.25.40.GENE3D); IPR002885 (PFAM); IPR002885 (TIGRFAM); PTHR24015:SF347 (PANTHER); PTHR24015 (PANTHER); IPR002885 (PROSITE_PROFILES); IPR002885 (PROSITE_PROFILES); IPR002885 (PROSITE_PROFILES); IPR002885 (PROSITE_PROFILES); IPR002885 (PROSITE_PROFILES); IPR002885 (PROSITE_PROFILES); IPR002885 (PROSITE_PROFILES); IPR002885 (PROSITE_PROFILES)	F:GO:0005515	F:protein binding
HSK10288_c0_g1_i1	exocyst complex component EXO70B1-like	749	14	1.41208e-36	66.67	1	C:GO:0016020	C:membrane			mobidb-lite (MOBIDB_LITE)	no GO terms	no GO terms
HSK10288_c0_g2_i1	exocyst complex component EXO70B1-like	611	10	5.17032e-51	74.06	1	C:GO:0016021	C:integral component of membrane			no IPS match	no IPS match	no IPS match
HSK10289_c0_g1_i1	hypothetical protein CISIN_1g039041mg, partial	253	20	3.78669e-39	85.29						no IPS match	no IPS match	no IPS match
HSK10289_c1_g1_i1	hypothetical protein CISIN_1g039496mg, partial	382	20	9.16686e-83	89.34						PTHR32387:SF3 (PANTHER); PTHR32387 (PANTHER)	no GO terms	no GO terms
HSK10290_c0_g1_i1	probable aminotransferase TAT2	1472	20	0	85.77	4	P:GO:0006520; F:GO:0008483; P:GO:0009058; F:GO:0030170	P:cellular amino acid metabolic process; F:transaminase activity; P:biosynthetic process; F:pyridoxal phosphate binding			IPR015421 (G3DSA:3.40.640.GENE3D); IPR004839 (PFAM); IPR005958 (PIRSF); IPR005958 (TIGRFAM); IPR015422 (G3DSA:3.90.1150.GENE3D); PTHR11751 (PANTHER); PTHR11751:SF387 (PANTHER); cd00609 (CDD); IPR015424 (SUPERFAMILY)	F:GO:0003824; P:GO:0006520; F:GO:0008483; P:GO:0009058; F:GO:0030170	F:catalytic activity; P:cellular amino acid metabolic process; F:transaminase activity; P:biosynthetic process; F:pyridoxal phosphate binding
HSK10290_c0_g1_i2	probable aminotransferase TAT2	629	20	1.54632e-81	81.47	4	P:GO:0006520; F:GO:0008483; P:GO:0009058; F:GO:0030170	P:cellular amino acid metabolic process; F:transaminase activity; P:biosynthetic process; F:pyridoxal phosphate binding			IPR004839 (PFAM); IPR015422 (G3DSA:3.90.1150.GENE3D); PTHR11751 (PANTHER); PTHR11751:SF387 (PANTHER); IPR015424 (SUPERFAMILY)	F:GO:0003824; P:GO:0009058; F:GO:0030170	F:catalytic activity; P:biosynthetic process; F:pyridoxal phosphate binding
HSK10291_c0_g1_i1	---NA---	515									no IPS match	no IPS match	no IPS match
HSK10292_c0_g1_i1	Gag-Pol polyprotein	361	20	2.20452e-64	88.37	3	F:GO:0003676; F:GO:0008270; P:GO:0015074	F:nucleic acid binding; F:zinc ion binding; P:DNA integration			no IPS match	no IPS match	no IPS match
HSK10292_c0_g1_i2	Gag-Pol polyprotein	417	20	1.25183e-76	87.44	3	F:GO:0003676; F:GO:0008270; P:GO:0015074	F:nucleic acid binding; F:zinc ion binding; P:DNA integration			PF14223 (PFAM); PTHR34676 (PANTHER)	no GO terms	no GO terms
HSK10293_c0_g1_i1	probable small nuclear ribonucleoprotein F	738	20	1.46702e-48	98.77	8	P:GO:0000387; F:GO:0003723; C:GO:0005685; C:GO:0005730; C:GO:0005732; C:GO:0005829; C:GO:0016021; C:GO:0071013	P:spliceosomal snRNP assembly; F:RNA binding; C:U1 snRNP; C:nucleolus; C:small nucleolar ribonucleoprotein complex; C:cytosol; C:integral component of membrane; C:catalytic step 2 spliceosome			G3DSA:2.30.30.100 (GENE3D); IPR016487 (PIRSF); IPR001163 (PFAM); IPR016487 (PANTHER); PTHR11021:SF8 (PANTHER); IPR034100 (CDD); IPR010920 (SUPERFAMILY)	P:GO:0000387; P:GO:0000398; C:GO:0005681; C:GO:0005732	P:spliceosomal snRNP assembly; P:mRNA splicing, via spliceosome; C:spliceosomal complex; C:small nucleolar ribonucleoprotein complex
HSK10294_c0_g1_i1	pentatricopeptide repeat-containing protein At3g13160, mitochondrial-like	991	20	0	81.55	1	F:GO:0005515	F:protein binding			IPR002885 (TIGRFAM); IPR002885 (PFAM); IPR011990 (G3DSA:1.25.40.GENE3D); IPR011990 (G3DSA:1.25.40.GENE3D); IPR002885 (PFAM); PTHR24015 (PANTHER); PTHR24015:SF1052 (PANTHER); IPR002885 (PROSITE_PROFILES); IPR002885 (PROSITE_PROFILES); IPR002885 (PROSITE_PROFILES); IPR002885 (PROSITE_PROFILES); PS51257 (PROSITE_PROFILES); IPR002885 (PROSITE_PROFILES); IPR002885 (PROSITE_PROFILES); IPR002885 (PROSIT…	F:GO:0005515	F:protein binding
HSK10295_c0_g1_i1	protein cornichon homolog 1 isoform X2	902	20	3.10767e-100	82.36	2	C:GO:0016021; P:GO:0016192	C:integral component of membrane; P:vesicle-mediated transport			IPR003377 (PFAM); PTHR12290:SF18 (PANTHER); PTHR12290 (PANTHER)	P:GO:0016192	P:vesicle-mediated transport
HSK10295_c0_g1_i2	protein cornichon homolog 1 isoform X2	1014	20	3.99085e-147	82.18	2	C:GO:0016021; P:GO:0016192	C:integral component of membrane; P:vesicle-mediated transport			IPR003377 (PFAM); PTHR12290 (PANTHER); PTHR12290:SF18 (PANTHER)	P:GO:0016192	P:vesicle-mediated transport
HSK10296_c1_g1_i1	hypothetical protein CUMW_262690	275	2	1.64052e-10	94.33						no IPS match	no IPS match	no IPS match
HSK10296_c1_g2_i1	hypothetical protein CUMW_255850	274	2	1.07435e-11	95.05						no IPS match	no IPS match	no IPS match
HSK10297_c0_g1_i1	transcription factor MYB35 isoform X1	852	20	4.63241e-38	73.58	1	F:GO:0003677	F:DNA binding			G3DSA:1.10.10.60 (GENE3D); PTHR10641:SF716 (PANTHER); PTHR10641 (PANTHER); IPR017930 (PROSITE_PROFILES); IPR009057 (SUPERFAMILY)	F:GO:0003677	F:DNA binding
HSK10297_c0_g1_i2	hypothetical protein CICLE_v10026855mg	824	20	4.70514e-58	92.17						mobidb-lite (MOBIDB_LITE)	no GO terms	no GO terms
HSK10297_c0_g1_i3	hypothetical protein CICLE_v10026855mg	682	20	9.62051e-59	92.17						mobidb-lite (MOBIDB_LITE)	no GO terms	no GO terms
HSK10298_c0_g1_i1	---NA---	228									no IPS match	no IPS match	no IPS match
HSK10298_c0_g1_i2	---NA---	286									no IPS match	no IPS match	no IPS match
HSK10298_c1_g1_i1	---NA---	233									no IPS match	no IPS match	no IPS match
HSK10298_c1_g1_i2	---NA---	627									no IPS match	no IPS match	no IPS match
HSK10298_c1_g1_i3	protein LOW PSII ACCUMULATION 3, chloroplastic isoform X2	281	15	1.94018e-05	79.1						no IPS match	no IPS match	no IPS match
HSK10299_c0_g1_i1	Galacturonosyltransferase-like 4, putative	1246	20	0	82.48	4	P:GO:0000271; C:GO:0005794; C:GO:0016020; F:GO:0016757	P:polysaccharide biosynthetic process; C:Golgi apparatus; C:membrane; F:transferase activity, transferring glycosyl groups			IPR002495 (PFAM); IPR029044 (G3DSA:3.90.550.GENE3D); PTHR13778 (PANTHER); PTHR13778:SF1 (PANTHER); IPR029044 (SUPERFAMILY)	F:GO:0016757	F:transferase activity, transferring glycosyl groups
HSK10299_c0_g1_i2	Galacturonosyltransferase-like 4, putative	1398	20	0	78.85	4	P:GO:0000271; C:GO:0005794; C:GO:0016020; F:GO:0016757	P:polysaccharide biosynthetic process; C:Golgi apparatus; C:membrane; F:transferase activity, transferring glycosyl groups			IPR002495 (PFAM); IPR029044 (G3DSA:3.90.550.GENE3D); mobidb-lite (MOBIDB_LITE); PTHR13778:SF1 (PANTHER); PTHR13778 (PANTHER); IPR029044 (SUPERFAMILY)	F:GO:0016757	F:transferase activity, transferring glycosyl groups
HSK103_c0_g1_i1	---NA---	259									no IPS match	no IPS match	no IPS match
HSK1030_c0_g1_i1	PREDICTED: dynamin-2A-like	268	1	8.75598e-08	100						no IPS match	no IPS match	no IPS match
HSK10300_c0_g1_i1	8-amino-7-oxononanoate synthase	928	20	1.32387e-147	83.81	1	C:GO:0016021	C:integral component of membrane			PTHR35731 (PANTHER)	no GO terms	no GO terms
HSK10301_c0_g1_i1	---NA---	242									mobidb-lite (MOBIDB_LITE)	no GO terms	no GO terms
HSK10301_c0_g2_i1	eukaryotic translation initiation factor 3 subunit J-like	1333	20	7.06551e-80	92.44	7	P:GO:0001732; F:GO:0003743; C:GO:0005840; C:GO:0005852; P:GO:0006446; C:GO:0016282; C:GO:0033290	P:formation of cytoplasmic translation initiation complex; F:translation initiation factor activity; C:ribosome; C:eukaryotic translation initiation factor 3 complex; P:regulation of translational initiation; C:eukaryotic 43S preinitiation complex; C:eukaryotic 48S preinitiation complex			IPR023194 (G3DSA:1.10.246.GENE3D); IPR013906 (PFAM); mobidb-lite (MOBIDB_LITE); IPR013906 (PANTHER); IPR013906 (HAMAP)	F:GO:0003743; C:GO:0005737; C:GO:0005852	F:translation initiation factor activity; C:cytoplasm; C:eukaryotic translation initiation factor 3 complex
HSK10301_c0_g2_i2	eukaryotic translation initiation factor 3 subunit J-like	1392	20	1.2326e-79	92.44	7	P:GO:0001732; F:GO:0003743; C:GO:0005840; C:GO:0005852; P:GO:0006446; C:GO:0016282; C:GO:0033290	P:formation of cytoplasmic translation initiation complex; F:translation initiation factor activity; C:ribosome; C:eukaryotic translation initiation factor 3 complex; P:regulation of translational initiation; C:eukaryotic 43S preinitiation complex; C:eukaryotic 48S preinitiation complex			IPR023194 (G3DSA:1.10.246.GENE3D); IPR013906 (PFAM); mobidb-lite (MOBIDB_LITE); IPR013906 (PANTHER); IPR013906 (HAMAP)	F:GO:0003743; C:GO:0005737; C:GO:0005852	F:translation initiation factor activity; C:cytoplasm; C:eukaryotic translation initiation factor 3 complex
HSK10302_c0_g1_i1	protein kinase PINOID 2	228	20	7.13427e-49	95.92	4	F:GO:0004672; F:GO:0005524; P:GO:0006468; C:GO:0016021	F:protein kinase activity; F:ATP binding; P:protein phosphorylation; C:integral component of membrane			G3DSA:3.30.200.20 (GENE3D); IPR000719 (PFAM); PTHR24351:SF70 (PANTHER); PTHR24351 (PANTHER); IPR000719 (PROSITE_PROFILES); IPR011009 (SUPERFAMILY)	F:GO:0004672; F:GO:0005524; P:GO:0006468	F:protein kinase activity; F:ATP binding; P:protein phosphorylation
HSK10302_c0_g2_i1	protein kinase PINOID 2	809	20	0	88.43	9	F:GO:0004674; F:GO:0005524; C:GO:0005634; C:GO:0005737; C:GO:0005886; P:GO:0006468; P:GO:0009069; C:GO:0016021; P:GO:0035556	F:protein serine/threonine kinase activity; F:ATP binding; C:nucleus; C:cytoplasm; C:plasma membrane; P:protein phosphorylation; P:serine family amino acid metabolic process; C:integral component of membrane; P:intracellular signal transduction	EC:2.7.11	Transferring phosphorus-containing groups	IPR000719 (PFAM); PTHR24351 (PANTHER); PTHR24351:SF70 (PANTHER); IPR000719 (PROSITE_PROFILES); IPR011009 (SUPERFAMILY)	F:GO:0004672; F:GO:0005524; P:GO:0006468	F:protein kinase activity; F:ATP binding; P:protein phosphorylation
HSK10303_c0_g1_i1	Copper transport protein family, putative	556	20	4.12472e-44	74.85	4	C:GO:0005737; P:GO:0030001; F:GO:0046914; P:GO:0046916	C:cytoplasm; P:metal ion transport; F:transition metal ion binding; P:cellular transition metal ion homeostasis			PTHR22814:SF181 (PANTHER); PTHR22814 (PANTHER)	no GO terms	no GO terms
HSK10303_c0_g1_i2	PREDICTED: uncharacterized protein LOC102630781 isoform X1	595	20	2.61108e-84	82.12	4	C:GO:0005737; P:GO:0030001; F:GO:0046914; P:GO:0046916	C:cytoplasm; P:metal ion transport; F:transition metal ion binding; P:cellular transition metal ion homeostasis			G3DSA:3.30.70.100 (GENE3D); PTHR22814:SF181 (PANTHER); PTHR22814 (PANTHER); IPR036163 (SUPERFAMILY)	P:GO:0030001; F:GO:0046872	P:metal ion transport; F:metal ion binding
HSK10304_c0_g1_i1	secoisolariciresinol dehydrogenase-like	1232	20	0	90.09	2	F:GO:0016491; P:GO:0055114	F:oxidoreductase activity; P:oxidation-reduction process			IPR002347 (PRINTS); IPR002347 (PRINTS); G3DSA:3.40.50.720 (GENE3D); PF13561 (PFAM); PTHR43180 (PANTHER); PTHR43180:SF20 (PANTHER); cd05326 (CDD); IPR036291 (SUPERFAMILY)	no GO terms	no GO terms
HSK10304_c0_g1_i2	secoisolariciresinol dehydrogenase-like	1121	20	0	90.71	2	F:GO:0016491; P:GO:0055114	F:oxidoreductase activity; P:oxidation-reduction process			IPR002347 (PRINTS); IPR002347 (PRINTS); PF13561 (PFAM); G3DSA:3.40.50.720 (GENE3D); PTHR43180 (PANTHER); PTHR43180:SF20 (PANTHER); cd05326 (CDD); IPR036291 (SUPERFAMILY)	no GO terms	no GO terms
HSK10305_c0_g1_i1	replication protein A 32 kDa subunit A	1164	20	0	82.21	6	F:GO:0003677; C:GO:0005634; P:GO:0006260; P:GO:0006281; P:GO:0006310; P:GO:0016458	F:DNA binding; C:nucleus; P:DNA replication; P:DNA repair; P:DNA recombination; P:gene silencing			IPR036388 (G3DSA:1.10.10.GENE3D); IPR014892 (PFAM); G3DSA:2.40.50.140 (GENE3D); IPR014646 (PIRSF); IPR004365 (PFAM); mobidb-lite (MOBIDB_LITE); mobidb-lite (MOBIDB_LITE); PTHR13989 (PANTHER); PTHR13989:SF22 (PANTHER); cd04478 (CDD); IPR012340 (SUPERFAMILY); IPR036390 (SUPERFAMILY)	F:GO:0003676; F:GO:0003677; C:GO:0005634; P:GO:0006260; P:GO:0006281; P:GO:0006310	F:nucleic acid binding; F:DNA binding; C:nucleus; P:DNA replication; P:DNA repair; P:DNA recombination
HSK10306_c0_g1_i1	---NA---	958									no IPS match	no IPS match	no IPS match
HSK10307_c0_g1_i1	probable leucine-rich repeat receptor-like protein kinase At1g68400	1716	20	0	89.88	4	F:GO:0004672; F:GO:0005524; P:GO:0006468; C:GO:0016021	F:protein kinase activity; F:ATP binding; P:protein phosphorylation; C:integral component of membrane			G3DSA:1.10.510.10 (GENE3D); IPR000719 (PFAM); G3DSA:3.30.200.20 (GENE3D); mobidb-lite (MOBIDB_LITE); PTHR27008 (PANTHER); PTHR27008:SF44 (PANTHER); IPR000719 (PROSITE_PROFILES); cd14066 (CDD); IPR011009 (SUPERFAMILY)	F:GO:0004672; F:GO:0005524; P:GO:0006468	F:protein kinase activity; F:ATP binding; P:protein phosphorylation
HSK10307_c0_g2_i1	probable leucine-rich repeat receptor-like protein kinase At1g68400	473	20	1.34238e-90	89.54	11	F:GO:0004602; F:GO:0004672; F:GO:0005515; F:GO:0005524; P:GO:0006468; P:GO:0006749; P:GO:0006804; P:GO:0006979; C:GO:0016021; P:GO:0055114; P:GO:0098869	F:glutathione peroxidase activity; F:protein kinase activity; F:protein binding; F:ATP binding; P:protein phosphorylation; P:glutathione metabolic process; P:obsolete peroxidase reaction; P:response to oxidative stress; C:integral component of membrane; P:oxidation-reduction process; P:cellular oxidant detoxification	EC:1.11.1.9; EC:1.11.1.7	Glutathione peroxidase; Peroxidase	IPR032675 (G3DSA:3.80.10.GENE3D); IPR001611 (PFAM); PTHR27008:SF44 (PANTHER); PTHR27008 (PANTHER); SSF52058 (SUPERFAMILY)	F:GO:0005515	F:protein binding
HSK10308_c0_g1_i1	hypothetical protein CICLE_v10011256mg	394	4	1.52867e-21	85.19	6	F:GO:0004674; F:GO:0005524; P:GO:0006468; P:GO:0009069; C:GO:0016021; F:GO:0030247	F:protein serine/threonine kinase activity; F:ATP binding; P:protein phosphorylation; P:serine family amino acid metabolic process; C:integral component of membrane; F:polysaccharide binding	EC:2.7.11	Transferring phosphorus-containing groups	no IPS match	no IPS match	no IPS match
HSK10308_c1_g1_i1	hypothetical protein CICLE_v10011256mg	320	2	7.92658e-16	93.2	1	C:GO:0016021	C:integral component of membrane			no IPS match	no IPS match	no IPS match
HSK10309_c0_g1_i1	serine/arginine-rich splicing factor 4-like	580	20	3.52113e-82	65.51	2	F:GO:0003723; F:GO:0008270	F:RNA binding; F:zinc ion binding			mobidb-lite (MOBIDB_LITE); mobidb-lite (MOBIDB_LITE)	no GO terms	no GO terms
HSK10310_c0_g1_i1	hypothetical protein CISIN_1g044990mg, partial	467	20	3.25337e-62	84.86	1	C:GO:0016021	C:integral component of membrane			PTHR37245 (PANTHER)	no GO terms	no GO terms
HSK10311_c0_g1_i1	lysM domain receptor-like kinase 3	570	2	7.73414e-05	100	3	F:GO:0004672; F:GO:0005524; P:GO:0006468	F:protein kinase activity; F:ATP binding; P:protein phosphorylation			no IPS match	no IPS match	no IPS match
HSK10312_c0_g1_i1	TMV resistance protein N-like isoform X1	380	20	8.25671e-20	84.16	2	P:GO:0007165; F:GO:0043531	P:signal transduction; F:ADP binding			no IPS match	no IPS match	no IPS match
HSK10312_c0_g1_i2	TMV resistance protein N-like isoform X1	381	20	1.37312e-37	87.43	2	P:GO:0007165; F:GO:0043531	P:signal transduction; F:ADP binding			no IPS match	no IPS match	no IPS match
HSK10312_c1_g1_i1	TMV resistance protein N-like isoform X1	224	20	1.90453e-43	86.27	2	P:GO:0007165; F:GO:0043531	P:signal transduction; F:ADP binding			no IPS match	no IPS match	no IPS match
HSK10312_c1_g1_i2	TMV resistance protein N-like isoform X1	298	20	1.91141e-29	87.61	2	P:GO:0007165; F:GO:0043531	P:signal transduction; F:ADP binding			PTHR11017 (PANTHER)	no GO terms	no GO terms
HSK10313_c0_g1_i1	ATPase WRNIP1	1763	20	0	87.61	3	F:GO:0003677; F:GO:0005524; P:GO:0006260	F:DNA binding; F:ATP binding; P:DNA replication			IPR003959 (PFAM); G3DSA:1.10.3710.10 (GENE3D); G3DSA:1.20.272.10 (GENE3D); IPR032423 (PFAM); IPR021886 (PFAM); G3DSA:3.40.50.300 (GENE3D); G3DSA:1.10.8.60 (GENE3D); PTHR13779:SF7 (PANTHER); PTHR13779 (PANTHER); cd00009 (CDD); IPR027417 (SUPERFAMILY); IPR008921 (SUPERFAMILY)	F:GO:0003677; F:GO:0005524; P:GO:0006260	F:DNA binding; F:ATP binding; P:DNA replication
HSK10314_c0_g1_i1	cell wall / vacuolar inhibitor of fructosidase 1-like	671	20	6.22931e-95	71.82	3	F:GO:0004857; P:GO:0043086; C:GO:0044464	F:enzyme inhibitor activity; P:negative regulation of catalytic activity; C:cell part			IPR006501 (TIGRFAM); IPR006501 (PFAM); IPR035513 (G3DSA:1.20.140.GENE3D); PTHR31080 (PANTHER); PTHR31080:SF18 (PANTHER); IPR034087 (CDD); IPR035513 (SUPERFAMILY)	F:GO:0004857; P:GO:0043086	F:enzyme inhibitor activity; P:negative regulation of catalytic activity
HSK10315_c0_g1_i1	transmembrane protein 234 homolog	631	20	1.00618e-67	83.42	1	C:GO:0016021	C:integral component of membrane			IPR018908 (PFAM); IPR018908 (PANTHER)	no GO terms	no GO terms
HSK10315_c0_g2_i1	factor of DNA methylation 1-like	218	20	6.06409e-32	89.27	2	C:GO:0005655; P:GO:0031047	C:nucleolar ribonuclease P complex; P:gene silencing by RNA			IPR005379 (PFAM); PTHR21596:SF43 (PANTHER); PTHR21596 (PANTHER)	no GO terms	no GO terms
HSK10316_c0_g1_i1	ultraviolet-B receptor UVR8	976	20	4.31373e-171	82.39	1	F:GO:0016874	F:ligase activity			IPR000408 (PRINTS); IPR000408 (PFAM); PF13540 (PFAM); IPR009091 (G3DSA:2.130.10.GENE3D); PTHR22870 (PANTHER); IPR000408 (PROSITE_PROFILES); IPR000408 (PROSITE_PROFILES); IPR000408 (PROSITE_PROFILES); IPR009091 (SUPERFAMILY)	no GO terms	no GO terms
HSK10316_c0_g1_i2	ultraviolet-B receptor UVR8	1306	20	0	85.72	1	F:GO:0016874	F:ligase activity			IPR000408 (PRINTS); IPR000408 (PFAM); IPR009091 (G3DSA:2.130.10.GENE3D); PF13540 (PFAM); IPR000408 (PROSITE_PROFILES); IPR000408 (PROSITE_PROFILES); IPR000408 (PROSITE_PROFILES); IPR000408 (PROSITE_PROFILES); IPR000408 (PROSITE_PROFILES); IPR009091 (SUPERFAMILY)	no GO terms	no GO terms
HSK10317_c0_g1_i1	hydroxyethylthiazole kinase	1513	20	0	89.82	3	F:GO:0004417; P:GO:0016310; P:GO:0036172	F:hydroxyethylthiazole kinase activity; P:phosphorylation; P:thiamine salvage	EC:2.7.1.50	Hydroxyethylthiazole kinase	IPR000417 (PRINTS); IPR029056 (G3DSA:3.40.1190.GENE3D); IPR000417 (PFAM); IPR000417 (PIRSF); IPR000417 (PANTHER); IPR000417 (HAMAP); IPR000417 (CDD); IPR029056 (SUPERFAMILY)	F:GO:0004417; P:GO:0009228	F:hydroxyethylthiazole kinase activity; P:thiamine biosynthetic process
HSK10317_c0_g1_i2	hydroxyethylthiazole kinase	1169	20	1.66053e-178	90.55	3	F:GO:0004417; P:GO:0016310; P:GO:0036172	F:hydroxyethylthiazole kinase activity; P:phosphorylation; P:thiamine salvage	EC:2.7.1.50	Hydroxyethylthiazole kinase	IPR000417 (PRINTS); IPR000417 (PIRSF); IPR029056 (G3DSA:3.40.1190.GENE3D); IPR000417 (PFAM); IPR000417 (PANTHER); IPR000417 (HAMAP); IPR000417 (CDD); IPR029056 (SUPERFAMILY)	F:GO:0004417; P:GO:0009228	F:hydroxyethylthiazole kinase activity; P:thiamine biosynthetic process
HSK10317_c0_g2_i1	dirigent protein 16-like	640	20	5.3924e-87	85.49	1	C:GO:0048046	C:apoplast			PTHR21495 (PANTHER); PTHR21495:SF86 (PANTHER)	no GO terms	no GO terms
HSK10318_c0_g1_i1	---NA---	1572									no IPS match	no IPS match	no IPS match
HSK10318_c0_g1_i2	UBP1-associated protein 2B-like isoform X1	2010	20	0	66.73	2	F:GO:0003723; C:GO:0016021	F:RNA binding; C:integral component of membrane			IPR000504 (PFAM); IPR012677 (G3DSA:3.30.70.GENE3D); IPR012677 (G3DSA:3.30.70.GENE3D); mobidb-lite (MOBIDB_LITE); mobidb-lite (MOBIDB_LITE); mobidb-lite (MOBIDB_LITE); PTHR44578:SF5 (PANTHER); PTHR44578 (PANTHER); IPR000504 (PROSITE_PROFILES); IPR000504 (PROSITE_PROFILES); IPR035979 (SUPERFAMILY); IPR035979 (SUPERFAMILY)	F:GO:0003676	F:nucleic acid binding
HSK10319_c0_g1_i1	---NA---	487									no IPS match	no IPS match	no IPS match
HSK10320_c0_g1_i1	fasciclin-like arabinogalactan protein 13	1015	20	1.29611e-103	85.23	1	C:GO:0016021	C:integral component of membrane			IPR036378 (G3DSA:2.30.180.GENE3D); IPR000782 (PFAM); mobidb-lite (MOBIDB_LITE); PTHR32077 (PANTHER); PTHR32077:SF6 (PANTHER); IPR000782 (PROSITE_PROFILES); IPR036378 (SUPERFAMILY)	no GO terms	no GO terms
HSK10321_c0_g1_i1	hypothetical protein CUMW_215250, partial	548	20	6.76742e-120	83.74	2	P:GO:0009414; P:GO:0090332	P:response to water deprivation; P:stomatal closure			PTHR35770 (PANTHER)	no GO terms	no GO terms
HSK10321_c0_g1_i2	hypothetical protein CUMW_215250, partial	1089	20	0	82.06	2	P:GO:0009414; P:GO:0090332	P:response to water deprivation; P:stomatal closure			mobidb-lite (MOBIDB_LITE); PTHR35770 (PANTHER)	no GO terms	no GO terms
HSK10322_c0_g1_i1	protein PPLZ02-like	857	20	1.33769e-114	83.69	6	F:GO:0003677; F:GO:0003700; C:GO:0005634; C:GO:0005667; P:GO:0006355; P:GO:0006355	F:DNA binding; F:DNA binding transcription factor activity; C:nucleus; C:transcription factor complex; P:regulation of transcription, DNA-templated; P:regulation of transcription, DNA-templated			IPR001471 (PRINTS); IPR036955 (G3DSA:3.30.730.GENE3D); IPR001471 (PFAM); IPR017392 (PIRSF); mobidb-lite (MOBIDB_LITE); PTHR31194:SF4 (PANTHER); PTHR31194 (PANTHER); IPR001471 (PROSITE_PROFILES); IPR001471 (CDD); IPR016177 (SUPERFAMILY)	F:GO:0003677; F:GO:0003700; P:GO:0006355	F:DNA binding; F:DNA binding transcription factor activity; P:regulation of transcription, DNA-templated
HSK10323_c0_g1_i1	peroxidase 3-like	1236	20	0	89.1	12	F:GO:0004601; C:GO:0005576; P:GO:0006804; P:GO:0006979; C:GO:0009505; C:GO:0009506; P:GO:0009664; F:GO:0020037; P:GO:0042744; F:GO:0046872; P:GO:0055114; P:GO:0098869	F:peroxidase activity; C:extracellular region; P:obsolete peroxidase reaction; P:response to oxidative stress; C:plant-type cell wall; C:plasmodesma; P:plant-type cell wall organization; F:heme binding; P:hydrogen peroxide catabolic process; F:metal ion binding; P:oxidation-reduction process; P:cellular oxidant detoxification	EC:1.11.1.7	Peroxidase	IPR002016 (PRINTS); IPR000823 (PRINTS); G3DSA:1.10.420.10 (GENE3D); IPR002016 (PFAM); G3DSA:1.10.520.10 (GENE3D); PTHR31235:SF39 (PANTHER); PTHR31235 (PANTHER); IPR002016 (PROSITE_PROFILES); IPR033905 (CDD); IPR010255 (SUPERFAMILY)	F:GO:0004601; P:GO:0006979; F:GO:0020037; P:GO:0042744; P:GO:0055114	F:peroxidase activity; P:response to oxidative stress; F:heme binding; P:hydrogen peroxide catabolic process; P:oxidation-reduction process
HSK10323_c0_g1_i2	peroxidase 3-like	1499	20	0	80.68	12	F:GO:0004601; C:GO:0005576; P:GO:0006804; P:GO:0006979; C:GO:0009505; C:GO:0009506; P:GO:0009664; F:GO:0020037; P:GO:0042744; F:GO:0046872; P:GO:0055114; P:GO:0098869	F:peroxidase activity; C:extracellular region; P:obsolete peroxidase reaction; P:response to oxidative stress; C:plant-type cell wall; C:plasmodesma; P:plant-type cell wall organization; F:heme binding; P:hydrogen peroxide catabolic process; F:metal ion binding; P:oxidation-reduction process; P:cellular oxidant detoxification	EC:1.11.1.7	Peroxidase	IPR002016 (PRINTS); IPR000823 (PRINTS); IPR002016 (PFAM); G3DSA:1.10.520.10 (GENE3D); G3DSA:1.10.420.10 (GENE3D); PTHR31235 (PANTHER); PTHR31235:SF162 (PANTHER); IPR002016 (PROSITE_PROFILES); IPR033905 (CDD); IPR010255 (SUPERFAMILY)	F:GO:0004601; P:GO:0006979; F:GO:0020037; P:GO:0042744; P:GO:0055114	F:peroxidase activity; P:response to oxidative stress; F:heme binding; P:hydrogen peroxide catabolic process; P:oxidation-reduction process
HSK10323_c0_g1_i3	peroxidase 3-like	1400	20	0	89.12	12	F:GO:0004601; C:GO:0005576; P:GO:0006804; P:GO:0006979; C:GO:0009505; C:GO:0009506; P:GO:0009664; F:GO:0020037; P:GO:0042744; F:GO:0046872; P:GO:0055114; P:GO:0098869	F:peroxidase activity; C:extracellular region; P:obsolete peroxidase reaction; P:response to oxidative stress; C:plant-type cell wall; C:plasmodesma; P:plant-type cell wall organization; F:heme binding; P:hydrogen peroxide catabolic process; F:metal ion binding; P:oxidation-reduction process; P:cellular oxidant detoxification	EC:1.11.1.7	Peroxidase	IPR000823 (PRINTS); IPR002016 (PRINTS); G3DSA:1.10.520.10 (GENE3D); IPR002016 (PFAM); G3DSA:1.10.420.10 (GENE3D); PTHR31235 (PANTHER); PTHR31235:SF39 (PANTHER); IPR002016 (PROSITE_PROFILES); IPR033905 (CDD); IPR010255 (SUPERFAMILY)	F:GO:0004601; P:GO:0006979; F:GO:0020037; P:GO:0042744; P:GO:0055114	F:peroxidase activity; P:response to oxidative stress; F:heme binding; P:hydrogen peroxide catabolic process; P:oxidation-reduction process
HSK10324_c0_g1_i1	LOB domain-containing protein 40	1134	20	1.36854e-161	74.02						IPR004883 (PFAM); mobidb-lite (MOBIDB_LITE); PTHR31304 (PANTHER); PTHR31304:SF9 (PANTHER); IPR004883 (PROSITE_PROFILES)	no GO terms	no GO terms
HSK10325_c0_g1_i1	---NA---	212									no IPS match	no IPS match	no IPS match
HSK10325_c0_g2_i1	amino-acid permease BAT1 homolog isoform X2	914	20	0	94.05	13	F:GO:0005313; C:GO:0005887; F:GO:0015180; F:GO:0015181; F:GO:0015185; F:GO:0015189; F:GO:0015297; P:GO:0015808; P:GO:0015812; P:GO:0015813; P:GO:0015819; P:GO:1903401; P:GO:1903826	F:L-glutamate transmembrane transporter activity; C:integral component of plasma membrane; F:L-alanine transmembrane transporter activity; F:arginine transmembrane transporter activity; F:gamma-aminobutyric acid transmembrane transporter activity; F:L-lysine transmembrane transporter activity; F:antiporter activity; P:L-alanine transport; P:gamma-aminobutyric acid transport; P:L-glutamate transme…			G3DSA:1.20.1740.10 (GENE3D); IPR002293 (PFAM); PTHR11785 (PANTHER); PTHR11785:SF507 (PANTHER)	C:GO:0016020; F:GO:0022857; P:GO:0055085	C:membrane; F:transmembrane transporter activity; P:transmembrane transport
HSK10325_c0_g2_i2	amino-acid permease BAT1 homolog isoform X2	1645	20	0	94.72	4	P:GO:0006865; C:GO:0016021; F:GO:0022857; P:GO:0055085	P:amino acid transport; C:integral component of membrane; F:transmembrane transporter activity; P:transmembrane transport			IPR002293 (PIRSF); G3DSA:1.20.1740.10 (GENE3D); IPR002293 (PFAM); IPR004756 (TIGRFAM); PTHR11785:SF507 (PANTHER); PTHR11785 (PANTHER)	P:GO:0006865; C:GO:0016020; C:GO:0016021; F:GO:0022857; P:GO:0055085	P:amino acid transport; C:membrane; C:integral component of membrane; F:transmembrane transporter activity; P:transmembrane transport
HSK10325_c0_g2_i3	amino-acid permease BAT1 homolog isoform X3	552	20	2.82109e-107	95.19	4	P:GO:0006865; C:GO:0016021; F:GO:0022857; P:GO:0055085	P:amino acid transport; C:integral component of membrane; F:transmembrane transporter activity; P:transmembrane transport			IPR002293 (PFAM); PTHR11785:SF507 (PANTHER); PTHR11785 (PANTHER)	C:GO:0016020; F:GO:0022857; P:GO:0055085	C:membrane; F:transmembrane transporter activity; P:transmembrane transport
HSK10326_c0_g1_i1	---NA---	453									no IPS match	no IPS match	no IPS match
HSK10327_c0_g1_i1	cleavage stimulation factor subunit 50 isoform X1	944	20	2.37079e-170	91.58	1	F:GO:0005515	F:protein binding			IPR015943 (G3DSA:2.130.10.GENE3D); IPR001680 (PFAM); PTHR44133:SF1 (PANTHER); PTHR44133 (PANTHER); IPR001680 (PROSITE_PROFILES); IPR001680 (PROSITE_PROFILES); IPR017986 (PROSITE_PROFILES); IPR036322 (SUPERFAMILY)	F:GO:0005515	F:protein binding
HSK10327_c0_g1_i2	cleavage stimulation factor subunit 50 isoform X2	642	20	2.32391e-72	95.98	1	F:GO:0005515	F:protein binding			IPR015943 (G3DSA:2.130.10.GENE3D); PTHR44133:SF1 (PANTHER); PTHR44133 (PANTHER); IPR036322 (SUPERFAMILY)	F:GO:0005515	F:protein binding
HSK10327_c0_g1_i3	cleavage stimulation factor subunit 50 isoform X1	1530	20	0	93.27	1	F:GO:0005515	F:protein binding			IPR001680 (PFAM); IPR015943 (G3DSA:2.130.10.GENE3D); PTHR44133 (PANTHER); PTHR44133:SF1 (PANTHER); IPR001680 (PROSITE_PROFILES); IPR001680 (PROSITE_PROFILES); IPR017986 (PROSITE_PROFILES); IPR001680 (PROSITE_PROFILES); IPR001680 (PROSITE_PROFILES); cd00200 (CDD); IPR036322 (SUPERFAMILY)	F:GO:0005515	F:protein binding
HSK10327_c0_g1_i4	cleavage stimulation factor subunit 50 isoform X1	1555	20	0	92.4	1	F:GO:0005515	F:protein binding			IPR001680 (PFAM); IPR015943 (G3DSA:2.130.10.GENE3D); PTHR44133 (PANTHER); PTHR44133:SF1 (PANTHER); IPR017986 (PROSITE_PROFILES); IPR001680 (PROSITE_PROFILES); IPR001680 (PROSITE_PROFILES); IPR001680 (PROSITE_PROFILES); IPR036322 (SUPERFAMILY)	F:GO:0005515	F:protein binding
HSK10328_c0_g1_i1	E3 ubiquitin-protein ligase HOS1	3294	20	0	87.01	1	F:GO:0016874	F:ligase activity			IPR013083 (G3DSA:3.30.40.GENE3D); IPR025151 (PFAM); mobidb-lite (MOBIDB_LITE); mobidb-lite (MOBIDB_LITE); mobidb-lite (MOBIDB_LITE); mobidb-lite (MOBIDB_LITE); PTHR10044 (PANTHER); PTHR10044:SF144 (PANTHER)	no GO terms	no GO terms
HSK10328_c0_g1_i2	E3 ubiquitin-protein ligase HOS1 isoform X1	3185	20	0	88.3	1	F:GO:0016874	F:ligase activity			IPR025151 (PFAM); IPR013083 (G3DSA:3.30.40.GENE3D); mobidb-lite (MOBIDB_LITE); PTHR10044 (PANTHER); PTHR10044:SF144 (PANTHER)	no GO terms	no GO terms
HSK10329_c0_g1_i1	PREDICTED: uncharacterized protein LOC102610974	1014	20	4.23759e-112	72.06						PTHR35706 (PANTHER)	no GO terms	no GO terms
HSK10329_c1_g1_i1	hypothetical protein CUMW_286350	309	20	1.54281e-60	84.74						PTHR35706 (PANTHER)	no GO terms	no GO terms
HSK10330_c0_g1_i1	protein EXORDIUM-like 7	1303	20	0	89.17						IPR006766 (PFAM); PTHR31279:SF18 (PANTHER); IPR006766 (PANTHER)	no GO terms	no GO terms
HSK10330_c1_g1_i1	oligopeptide transporter 3	213	20	2.73084e-10	95.87	2	C:GO:0016021; P:GO:0055085	C:integral component of membrane; P:transmembrane transport			no IPS match	no IPS match	no IPS match
HSK10331_c0_g1_i1	hypothetical protein CISIN_1g0311052mg, partial	313	1	6.97035e-25	67.39						mobidb-lite (MOBIDB_LITE)	no GO terms	no GO terms
HSK10331_c0_g1_i2	hypothetical protein CISIN_1g0311052mg, partial	344	1	1.55243e-27	65.38						no IPS match	no IPS match	no IPS match
HSK10331_c0_g2_i1	PREDICTED: uncharacterized protein LOC107178506	376	2	1.31989e-16	54.14						no IPS match	no IPS match	no IPS match
HSK10332_c0_g1_i1	---NA---	1012									no IPS match	no IPS match	no IPS match
HSK10332_c0_g1_i2	---NA---	900									no IPS match	no IPS match	no IPS match
HSK10332_c0_g1_i3	---NA---	217									no IPS match	no IPS match	no IPS match
HSK10333_c0_g1_i1	60S ribosomal protein L11	514	20	2.59032e-80	99.53	6	F:GO:0003735; C:GO:0005634; C:GO:0005840; P:GO:0006412; F:GO:0019843; P:GO:0042254	F:structural constituent of ribosome; C:nucleus; C:ribosome; P:translation; F:rRNA binding; P:ribosome biogenesis			IPR031310 (PFAM); IPR022803 (G3DSA:3.30.1440.GENE3D); IPR031309 (PFAM); PTHR11994:SF15 (PANTHER); IPR002132 (PANTHER); IPR022803 (SUPERFAMILY)	F:GO:0003735; C:GO:0005840; P:GO:0006412	F:structural constituent of ribosome; C:ribosome; P:translation
HSK10333_c0_g1_i2	60S ribosomal protein L11	858	20	1.28002e-114	99.07	4	F:GO:0003735; C:GO:0005840; P:GO:0006412; P:GO:0042254	F:structural constituent of ribosome; C:ribosome; P:translation; P:ribosome biogenesis			IPR022803 (G3DSA:3.30.1440.GENE3D); IPR031309 (PFAM); IPR031310 (PFAM); IPR002132 (PIRSF); PTHR11994:SF15 (PANTHER); IPR002132 (PANTHER); IPR022803 (SUPERFAMILY)	F:GO:0003735; C:GO:0005840; P:GO:0006412	F:structural constituent of ribosome; C:ribosome; P:translation
HSK10334_c0_g1_i1	---NA---	575									no IPS match	no IPS match	no IPS match
HSK10335_c0_g1_i1	plant UBX domain-containing protein 2	2166	20	0	83.2	1	F:GO:0003676	F:nucleic acid binding			IPR018997 (PFAM); G3DSA:1.20.58.2190 (GENE3D); G3DSA:3.10.20.90 (GENE3D); mobidb-lite (MOBIDB_LITE); PTHR23153:SF38 (PANTHER); PTHR23153 (PANTHER); cd09212 (CDD); IPR036339 (SUPERFAMILY); IPR029071 (SUPERFAMILY)	no GO terms	no GO terms
HSK10335_c0_g1_i2	plant UBX domain-containing protein 2	1672	20	2.45066e-39	93.13	3	F:GO:0003677; P:GO:0006281; P:GO:0050832	F:DNA binding; P:DNA repair; P:defense response to fungus			PTHR23153 (PANTHER); PTHR23153:SF38 (PANTHER)	no GO terms	no GO terms
HSK10335_c0_g1_i3	plant UBX domain-containing protein 2	1836	20	5.04757e-39	93.13	3	F:GO:0003677; P:GO:0006281; P:GO:0050832	F:DNA binding; P:DNA repair; P:defense response to fungus			PTHR23153 (PANTHER); PTHR23153:SF38 (PANTHER)	no GO terms	no GO terms
HSK10336_c0_g1_i1	CST complex subunit CTC1 isoform X1	767	20	0	70.68	1	P:GO:0000723	P:telomere maintenance			PTHR14865 (PANTHER)	no GO terms	no GO terms
HSK10336_c0_g1_i2	CST complex subunit CTC1 isoform X1	479	20	2.28907e-83	65	1	P:GO:0000723	P:telomere maintenance			no IPS match	no IPS match	no IPS match
HSK10337_c0_g1_i1	OTU domain-containing protein At3g57810-like isoform X1	599	20	9.39561e-126	92.49						IPR003323 (PFAM); G3DSA:3.90.70.80 (GENE3D); PTHR12419 (PANTHER); PTHR12419:SF8 (PANTHER); IPR003323 (PROSITE_PROFILES); SSF54001 (SUPERFAMILY)	no GO terms	no GO terms
HSK10338_c0_g1_i1	protein transport protein Sec61 subunit gamma-like	618	20	8.19922e-30	98.82	5	P:GO:0006605; C:GO:0009941; F:GO:0015450; C:GO:0016021; P:GO:0071806	P:protein targeting; C:chloroplast envelope; F:P-P-bond-hydrolysis-driven protein transmembrane transporter activity; C:integral component of membrane; P:protein transmembrane transport			mobidb-lite (MOBIDB_LITE)	no GO terms	no GO terms
HSK10338_c0_g1_i2	---NA---	955									no IPS match	no IPS match	no IPS match
HSK10339_c0_g1_i1	cytochrome c6, chloroplastic	730	20	6.17867e-113	86.48	5	P:GO:0006118; F:GO:0009055; F:GO:0020037; P:GO:0022900; F:GO:0046872	P:obsolete electron transport; F:electron transfer activity; F:heme binding; P:electron transport chain; F:metal ion binding			IPR009056 (PFAM); IPR036909 (G3DSA:1.10.760.GENE3D); PTHR34688 (PANTHER); PTHR34688:SF1 (PANTHER); IPR009056 (PROSITE_PROFILES); IPR036909 (SUPERFAMILY)	F:GO:0009055; F:GO:0020037	F:electron transfer activity; F:heme binding
HSK10339_c0_g1_i2	cytochrome c6, chloroplastic	390	20	1.62989e-58	80.6	5	P:GO:0006118; F:GO:0009055; F:GO:0020037; P:GO:0022900; F:GO:0046872	P:obsolete electron transport; F:electron transfer activity; F:heme binding; P:electron transport chain; F:metal ion binding			IPR036909 (G3DSA:1.10.760.GENE3D); PTHR34688:SF1 (PANTHER); PTHR34688 (PANTHER); IPR009056 (PROSITE_PROFILES); IPR036909 (SUPERFAMILY)	F:GO:0009055; F:GO:0020037	F:electron transfer activity; F:heme binding
HSK1034_c0_g1_i1	---NA---	326									no IPS match	no IPS match	no IPS match
HSK10340_c0_g1_i1	serine/arginine-rich splicing factor SC35-like	1103	20	1.60034e-97	98.89	7	F:GO:0003723; F:GO:0004672; F:GO:0005509; F:GO:0005524; F:GO:0005544; P:GO:0006468; C:GO:0016021	F:RNA binding; F:protein kinase activity; F:calcium ion binding; F:ATP binding; F:calcium-dependent phospholipid binding; P:protein phosphorylation; C:integral component of membrane			IPR012677 (G3DSA:3.30.70.GENE3D); IPR000504 (PFAM); mobidb-lite (MOBIDB_LITE); PTHR23147:SF42 (PANTHER); PTHR23147 (PANTHER); IPR000504 (PROSITE_PROFILES); IPR035979 (SUPERFAMILY)	F:GO:0003676	F:nucleic acid binding
HSK10340_c0_g1_i2	serine/arginine-rich splicing factor SC35-like	1253	20	8.52951e-97	98.89	7	F:GO:0003723; F:GO:0004672; F:GO:0005509; F:GO:0005524; F:GO:0005544; P:GO:0006468; C:GO:0016021	F:RNA binding; F:protein kinase activity; F:calcium ion binding; F:ATP binding; F:calcium-dependent phospholipid binding; P:protein phosphorylation; C:integral component of membrane			IPR012677 (G3DSA:3.30.70.GENE3D); IPR000504 (PFAM); mobidb-lite (MOBIDB_LITE); PTHR23147:SF42 (PANTHER); PTHR23147 (PANTHER); IPR000504 (PROSITE_PROFILES); IPR035979 (SUPERFAMILY)	F:GO:0003676	F:nucleic acid binding
HSK10341_c0_g1_i1	pentatricopeptide repeat-containing protein At5g27270 isoform X1	1350	20	0	85.79	5	F:GO:0003723; F:GO:0004519; F:GO:0005515; P:GO:0009451; C:GO:0043231	F:RNA binding; F:endonuclease activity; F:protein binding; P:RNA modification; C:intracellular membrane-bounded organelle			IPR011990 (G3DSA:1.25.40.GENE3D); IPR002885 (TIGRFAM); IPR011990 (G3DSA:1.25.40.GENE3D); IPR002885 (PFAM); IPR002885 (PFAM); PTHR24015 (PANTHER); PTHR24015:SF321 (PANTHER); IPR002885 (PROSITE_PROFILES); IPR002885 (PROSITE_PROFILES); IPR002885 (PROSITE_PROFILES); IPR002885 (PROSITE_PROFILES); IPR002885 (PROSITE_PROFILES); IPR002885 (PROSITE_PROFILES); IPR002885 (PROSITE_PROFILES); IPR002885 (PROSI…	F:GO:0005515	F:protein binding
HSK10342_c0_g1_i1	auxin response factor 4 isoform X1	2831	20	0	77.64	4	F:GO:0003677; C:GO:0005634; P:GO:0006355; P:GO:0009734	F:DNA binding; C:nucleus; P:regulation of transcription, DNA-templated; P:auxin-activated signaling pathway			G3DSA:2.30.30.1040 (GENE3D); IPR003340 (PFAM); IPR032675 (G3DSA:3.80.10.GENE3D); IPR010525 (PFAM); IPR015300 (G3DSA:2.40.330.GENE3D); IPR032675 (G3DSA:3.80.10.GENE3D); mobidb-lite (MOBIDB_LITE); PTHR31384 (PANTHER); PTHR31384:SF20 (PANTHER); IPR003340 (PROSITE_PROFILES); IPR003340 (CDD); SSF52047 (SUPERFAMILY); IPR015300 (SUPERFAMILY)	F:GO:0003677; C:GO:0005634; P:GO:0006355; P:GO:0009725	F:DNA binding; C:nucleus; P:regulation of transcription, DNA-templated; P:response to hormone
HSK10342_c0_g1_i2	auxin response factor 4 isoform X2	3025	20	0	78.56	4	F:GO:0003677; C:GO:0005634; P:GO:0006355; P:GO:0009734	F:DNA binding; C:nucleus; P:regulation of transcription, DNA-templated; P:auxin-activated signaling pathway			IPR003340 (PFAM); IPR010525 (PFAM); IPR015300 (G3DSA:2.40.330.GENE3D); IPR032675 (G3DSA:3.80.10.GENE3D); G3DSA:2.30.30.1040 (GENE3D); PTHR31384:SF20 (PANTHER); PTHR31384 (PANTHER); IPR003340 (PROSITE_PROFILES); IPR003340 (CDD); SSF52047 (SUPERFAMILY); IPR015300 (SUPERFAMILY)	F:GO:0003677; C:GO:0005634; P:GO:0006355; P:GO:0009725	F:DNA binding; C:nucleus; P:regulation of transcription, DNA-templated; P:response to hormone
HSK10342_c0_g1_i3	auxin response factor 4-like isoform X2	2935	20	0	80.66	4	F:GO:0003677; C:GO:0005634; P:GO:0006355; P:GO:0009734	F:DNA binding; C:nucleus; P:regulation of transcription, DNA-templated; P:auxin-activated signaling pathway			IPR003340 (PFAM); IPR010525 (PFAM); IPR015300 (G3DSA:2.40.330.GENE3D); IPR032675 (G3DSA:3.80.10.GENE3D); G3DSA:2.30.30.1040 (GENE3D); PTHR31384:SF20 (PANTHER); PTHR31384 (PANTHER); IPR003340 (PROSITE_PROFILES); IPR003340 (CDD); SSF52047 (SUPERFAMILY); IPR015300 (SUPERFAMILY)	F:GO:0003677; C:GO:0005634; P:GO:0006355; P:GO:0009725	F:DNA binding; C:nucleus; P:regulation of transcription, DNA-templated; P:response to hormone
HSK10343_c0_g1_i1	Microbial collagenase	659	20	1.61507e-83	85.23						PTHR35690 (PANTHER)	no GO terms	no GO terms
HSK10343_c0_g1_i2	hypothetical protein CICLE_v10009207mg	872	20	1.81337e-166	82.67						PTHR35690 (PANTHER)	no GO terms	no GO terms
HSK10344_c0_g1_i1	PREDICTED: uncharacterized protein LOC102615497 isoform X1	1016	20	3.34861e-180	83.49						mobidb-lite (MOBIDB_LITE); PTHR35696 (PANTHER)	no GO terms	no GO terms
HSK10344_c0_g1_i2	PREDICTED: uncharacterized protein LOC102615497 isoform X2	1307	20	0	82.85						mobidb-lite (MOBIDB_LITE); mobidb-lite (MOBIDB_LITE); mobidb-lite (MOBIDB_LITE); PTHR35696 (PANTHER)	no GO terms	no GO terms
HSK10344_c0_g1_i3	PREDICTED: uncharacterized protein LOC102615497 isoform X1	776	20	4.12166e-66	80.98						PF05142 (PFAM); mobidb-lite (MOBIDB_LITE); mobidb-lite (MOBIDB_LITE); PTHR35696 (PANTHER)	no GO terms	no GO terms
HSK10345_c0_g1_i1	hypothetical protein CICLE_v10006191mg	684	3	0.00017348	95.83	2	C:GO:0016020; C:GO:0016021	C:membrane; C:integral component of membrane			mobidb-lite (MOBIDB_LITE)	no GO terms	no GO terms
HSK10347_c0_g1_i1	hypothetical protein CICLE_v10003974mg	330	1	1.48497e-21	86.89	1	F:GO:0043531	F:ADP binding			no IPS match	no IPS match	no IPS match
HSK10347_c0_g1_i2	hypothetical protein CICLE_v10003974mg	203	1	1.00076e-09	84.62	1	F:GO:0043531	F:ADP binding			no IPS match	no IPS match	no IPS match
HSK10347_c0_g2_i1	---NA---	499									no IPS match	no IPS match	no IPS match
HSK10348_c0_g1_i1	transcription factor MYB4-like	683	20	6.5733e-132	65.08	2	F:GO:0003677; C:GO:0016021	F:DNA binding; C:integral component of membrane			G3DSA:1.10.10.60 (GENE3D); IPR017930 (PROSITE_PROFILES)	no GO terms	no GO terms
HSK10349_c0_g1_i1	pathogenesis-related protein 5-like	969	20	4.50504e-97	63.56	1	C:GO:0016020	C:membrane			IPR001938 (PRINTS); IPR001938 (PIRSF); IPR001938 (PFAM); IPR037176 (G3DSA:2.60.110.GENE3D); IPR001938 (PANTHER); PTHR31048:SF34 (PANTHER); IPR001938 (PROSITE_PROFILES); PS51257 (PROSITE_PROFILES); IPR037176 (SUPERFAMILY)	no GO terms	no GO terms
HSK10349_c0_g1_i2	---NA---	552									no IPS match	no IPS match	no IPS match
HSK1035_c0_g1_i1	hypothetical protein CISIN_1g035026mg	224	1	0.000525155	80.77						no IPS match	no IPS match	no IPS match
HSK10350_c0_g1_i1	tRNA (adenine(58)-N(1))-methyltransferase catalytic subunit TRMT61A	889	20	1.72939e-164	94.96	3	F:GO:0016429; P:GO:0030488; C:GO:0031515	F:tRNA (adenine-N1-)-methyltransferase activity; P:tRNA methylation; C:tRNA (m1A) methyltransferase complex			IPR014816 (PIRSF); G3DSA:3.10.330.20 (GENE3D); G3DSA:3.40.50.150 (GENE3D); IPR014816 (PFAM); PTHR12133:SF2 (PANTHER); IPR014816 (PANTHER); IPR014816 (PROSITE_PROFILES); cd02440 (CDD); IPR029063 (SUPERFAMILY)	F:GO:0016429; P:GO:0030488; C:GO:0031515	F:tRNA (adenine-N1-)-methyltransferase activity; P:tRNA methylation; C:tRNA (m1A) methyltransferase complex
HSK10350_c0_g1_i2	tRNA (adenine(58)-N(1))-methyltransferase catalytic subunit TRMT61A	1118	20	0	89.81	3	F:GO:0016429; P:GO:0030488; C:GO:0031515	F:tRNA (adenine-N1-)-methyltransferase activity; P:tRNA methylation; C:tRNA (m1A) methyltransferase complex			G3DSA:3.40.50.150 (GENE3D); IPR014816 (PFAM); IPR014816 (PIRSF); G3DSA:3.10.330.20 (GENE3D); IPR014816 (PANTHER); PTHR12133:SF2 (PANTHER); IPR014816 (PROSITE_PROFILES); cd02440 (CDD); IPR029063 (SUPERFAMILY)	F:GO:0016429; P:GO:0030488; C:GO:0031515	F:tRNA (adenine-N1-)-methyltransferase activity; P:tRNA methylation; C:tRNA (m1A) methyltransferase complex
HSK10351_c0_g1_i1	hypothetical protein CUMW_061740	514	1	2.82097e-06	92.31	5	F:GO:0003676; F:GO:0003677; P:GO:0006355; C:GO:0016020; C:GO:0016021	F:nucleic acid binding; F:DNA binding; P:regulation of transcription, DNA-templated; C:membrane; C:integral component of membrane			mobidb-lite (MOBIDB_LITE)	no GO terms	no GO terms
HSK10351_c0_g1_i2	hypothetical protein CUMW_061740	580	1	4.24231e-06	92.31	5	F:GO:0003676; F:GO:0003677; P:GO:0006355; C:GO:0016020; C:GO:0016021	F:nucleic acid binding; F:DNA binding; P:regulation of transcription, DNA-templated; C:membrane; C:integral component of membrane			mobidb-lite (MOBIDB_LITE)	no GO terms	no GO terms
HSK10352_c0_g1_i1	pentatricopeptide repeat-containing protein At3g04760, chloroplastic	573	20	1.25732e-87	76.09	1	F:GO:0005515	F:protein binding			IPR011990 (G3DSA:1.25.40.GENE3D); IPR002885 (TIGRFAM); IPR002885 (PFAM); PTHR24015 (PANTHER); PTHR24015:SF572 (PANTHER); IPR002885 (PROSITE_PROFILES); IPR002885 (PROSITE_PROFILES)	F:GO:0005515	F:protein binding
HSK10352_c0_g2_i1	pentatricopeptide repeat-containing protein At3g04760, chloroplastic	1449	20	0	91.99	5	F:GO:0005515; F:GO:0008318; C:GO:0009507; P:GO:0018342; P:GO:0018342	F:protein binding; F:protein prenyltransferase activity; C:chloroplast; P:protein prenylation; P:protein prenylation			IPR002885 (TIGRFAM); IPR002885 (PFAM); IPR002885 (PFAM); IPR002885 (PFAM); IPR011990 (G3DSA:1.25.40.GENE3D); IPR011990 (G3DSA:1.25.40.GENE3D); IPR011990 (G3DSA:1.25.40.GENE3D); PTHR24015 (PANTHER); PTHR24015:SF572 (PANTHER); IPR002885 (PROSITE_PROFILES); IPR002885 (PROSITE_PROFILES); IPR002885 (PROSITE_PROFILES); IPR002885 (PROSITE_PROFILES); IPR002885 (PROSITE_PROFILES); IPR002885 (PROSITE_PROFI…	F:GO:0005515	F:protein binding
HSK10353_c0_g1_i1	---NA---	250									no IPS match	no IPS match	no IPS match
HSK10353_c0_g1_i2	putative methyltransferase At1g22800 isoform X1	482	1	6.61285e-05	90.91						no IPS match	no IPS match	no IPS match
HSK10354_c0_g1_i1	---NA---	491									no IPS match	no IPS match	no IPS match
HSK10355_c0_g1_i1	Plastid movement impaired 2	2302	20	1.66431e-132	80.6	2	C:GO:0005886; P:GO:0009624	C:plasma membrane; P:response to nematode			IPR025322 (PFAM); PTHR33148:SF6 (PANTHER); PTHR33148 (PANTHER)	no GO terms	no GO terms
HSK10355_c0_g1_i2	Plastid movement impaired 2	1096	20	2.57376e-154	79.14						IPR025322 (PFAM); PTHR33148:SF6 (PANTHER); PTHR33148 (PANTHER)	no GO terms	no GO terms
HSK10356_c0_g1_i1	putative pentatricopeptide repeat-containing protein At5g43820 isoform X2	365	5	1.06916e-28	96.72						no IPS match	no IPS match	no IPS match
HSK10356_c0_g2_i1	putative pentatricopeptide repeat-containing protein At5g43820	521	20	7.26624e-124	92.76	6	F:GO:0003723; F:GO:0004519; F:GO:0005515; P:GO:0009451; C:GO:0043231; P:GO:0090305	F:RNA binding; F:endonuclease activity; F:protein binding; P:RNA modification; C:intracellular membrane-bounded organelle; P:nucleic acid phosphodiester bond hydrolysis			IPR011990 (G3DSA:1.25.40.GENE3D); IPR002885 (PFAM); IPR002885 (TIGRFAM); IPR002885 (PFAM); PTHR24015 (PANTHER); PTHR24015:SF378 (PANTHER); IPR002885 (PROSITE_PROFILES); IPR002885 (PROSITE_PROFILES); IPR002885 (PROSITE_PROFILES); IPR002885 (PROSITE_PROFILES)	F:GO:0005515	F:protein binding
HSK10356_c0_g3_i1	putative pentatricopeptide repeat-containing protein At5g43820	552	20	5.8825e-44	86.9	5	F:GO:0003723; F:GO:0004519; P:GO:0009451; C:GO:0043231; P:GO:0090305	F:RNA binding; F:endonuclease activity; P:RNA modification; C:intracellular membrane-bounded organelle; P:nucleic acid phosphodiester bond hydrolysis			no IPS match	no IPS match	no IPS match
HSK10357_c0_g1_i1	respiratory burst oxidase homolog protein D-like	3244	20	0	91.58	17	F:GO:0004601; F:GO:0005509; C:GO:0005794; C:GO:0005886; P:GO:0006804; P:GO:0006979; P:GO:0007231; P:GO:0009408; P:GO:0009611; C:GO:0016021; F:GO:0016174; P:GO:0033500; P:GO:0043069; P:GO:0050832; P:GO:0055114; P:GO:0072593; P:GO:0098869	F:peroxidase activity; F:calcium ion binding; C:Golgi apparatus; C:plasma membrane; P:obsolete peroxidase reaction; P:response to oxidative stress; P:osmosensory signaling pathway; P:response to heat; P:response to wounding; C:integral component of membrane; F:NAD(P)H oxidase activity; P:carbohydrate homeostasis; P:negative regulation of programmed cell death; P:defense response to fungus; P:oxid…	EC:1.6.3.1; EC:1.11.1.7	NAD(P)H oxidase (H(2)O(2)-forming); Peroxidase	IPR000778 (PRINTS); IPR013130 (PFAM); IPR013623 (PFAM); IPR013112 (PFAM); G3DSA:2.40.30.10 (GENE3D); IPR013121 (PFAM); G3DSA:1.10.238.10 (GENE3D); G3DSA:3.40.50.80 (GENE3D),SFLDG01168 (SFLD),SFLDG01169 (SFLD); mobidb-lite (MOBIDB_LITE); PTHR11972 (PANTHER); PTHR11972:SF94 (PANTHER); IPR002048 (PROSITE_PROFILES); IPR017927 (PROSITE_PROFILES); IPR002048 (PROSITE_PROFILES); IPR002048 (CDD); cd06186 …	F:GO:0004601; F:GO:0005509; C:GO:0016020; F:GO:0016491; F:GO:0050664; P:GO:0055114	F:peroxidase activity; F:calcium ion binding; C:membrane; F:oxidoreductase activity; F:oxidoreductase activity, acting on NAD(P)H, oxygen as acceptor; P:oxidation-reduction process
HSK10358_c0_g1_i1	hypothetical protein CICLE_v10006384mg	393	3	2.20286e-43	84.62						no IPS match	no IPS match	no IPS match
HSK10359_c0_g1_i1	hypothetical protein CUMW_180260	611	1	3.75693e-08	98.33						no IPS match	no IPS match	no IPS match
HSK1036_c0_g1_i1	ubiquinone biosynthesis O-methyltransferase, mitochondrial	1042	20	0	89.01	6	F:GO:0004395; P:GO:0006744; F:GO:0008425; F:GO:0008689; C:GO:0031314; P:GO:0032259	F:hexaprenyldihydroxybenzoate methyltransferase activity; P:ubiquinone biosynthetic process; F:2-polyprenyl-6-methoxy-1,4-benzoquinone methyltransferase activity; F:3-demethylubiquinone-9 3-O-methyltransferase activity; C:extrinsic component of mitochondrial inner membrane; P:methylation	EC:2.1.1.64; EC:2.1.1.114	3-demethylubiquinol 3-O-methyltransferase; Polyprenyldihydroxybenzoate methyltransferase	IPR010233 (TIGRFAM); G3DSA:3.40.50.150 (GENE3D); PF13489 (PFAM); PTHR43464:SF14 (PANTHER); PTHR43464 (PANTHER); IPR010233 (HAMAP); cd02440 (CDD); IPR029063 (SUPERFAMILY)	P:GO:0006744; F:GO:0008425	P:ubiquinone biosynthetic process; F:2-polyprenyl-6-methoxy-1,4-benzoquinone methyltransferase activity
HSK10360_c0_g1_i1	putative disease resistance RPP13-like protein 1	323	20	3.99216e-09	94.23	1	F:GO:0043531	F:ADP binding			no IPS match	no IPS match	no IPS match
HSK10361_c0_g1_i1	hypothetical protein CUMW_190190	545	2	6.00125e-07	100						no IPS match	no IPS match	no IPS match
HSK10362_c0_g1_i1	PGR5-like protein 1A, chloroplastic	1483	20	0	92.23	1	C:GO:0016021	C:integral component of membrane			PTHR31032:SF1 (PANTHER); PTHR31032 (PANTHER)	no GO terms	no GO terms
HSK10363_c0_g1_i1	Fanconi anemia group J protein homolog	827	20	2.51658e-57	80.24	6	F:GO:0003677; F:GO:0004003; F:GO:0005524; C:GO:0005657; P:GO:0006139; P:GO:0032508	F:DNA binding; F:ATP-dependent DNA helicase activity; F:ATP binding; C:replication fork; P:nucleobase-containing compound metabolic process; P:DNA duplex unwinding	EC:3.6.1.3; EC:3.6.1.15	Adenosinetriphosphatase; Nucleoside-triphosphate phosphatase	no IPS match	no IPS match	no IPS match
HSK10363_c0_g1_i2	Fanconi anemia group J protein homolog	675	20	4.27437e-105	81.53	6	F:GO:0003677; F:GO:0004003; F:GO:0005524; C:GO:0005657; P:GO:0006139; P:GO:0032508	F:DNA binding; F:ATP-dependent DNA helicase activity; F:ATP binding; C:replication fork; P:nucleobase-containing compound metabolic process; P:DNA duplex unwinding	EC:3.6.1.3; EC:3.6.1.15	Adenosinetriphosphatase; Nucleoside-triphosphate phosphatase	mobidb-lite (MOBIDB_LITE)	no GO terms	no GO terms
HSK10363_c0_g1_i3	---NA---	571									no IPS match	no IPS match	no IPS match
HSK10364_c0_g1_i1	transmembrane protein, putative	661	20	5.74339e-41	73.21	1	C:GO:0016021	C:integral component of membrane			mobidb-lite (MOBIDB_LITE); mobidb-lite (MOBIDB_LITE); PTHR33429 (PANTHER); PTHR33429:SF6 (PANTHER)	no GO terms	no GO terms
HSK10365_c0_g1_i1	---NA---	817									no IPS match	no IPS match	no IPS match
HSK10366_c0_g1_i1	transmembrane protein 136	746	20	6.57695e-139	87.45	1	C:GO:0016021	C:integral component of membrane			IPR006634 (PFAM); PTHR31898 (PANTHER); PTHR31898:SF1 (PANTHER); IPR006634 (PROSITE_PROFILES)	C:GO:0016021	C:integral component of membrane
HSK10367_c0_g1_i1	actin-depolymerizing factor 2	1041	20	2.6633e-96	98.28	3	F:GO:0003779; C:GO:0015629; P:GO:0030042	F:actin binding; C:actin cytoskeleton; P:actin filament depolymerization			IPR029006 (G3DSA:3.40.20.GENE3D); IPR002108 (PFAM); PTHR11913:SF50 (PANTHER); IPR017904 (PANTHER); IPR002108 (PROSITE_PROFILES); IPR017904 (CDD); SSF55753 (SUPERFAMILY)	F:GO:0003779; C:GO:0005622; C:GO:0015629; P:GO:0030042	F:actin binding; C:intracellular; C:actin cytoskeleton; P:actin filament depolymerization
HSK10368_c0_g1_i1	uncharacterized RNA-binding protein C17H9.04c-like	577	20	4.51853e-88	88.35	1	F:GO:0046872	F:metal ion binding			G3DSA:4.10.1060.10 (GENE3D); IPR001876 (PFAM); PTHR23111 (PANTHER); PTHR23111:SF41 (PANTHER); IPR001876 (PROSITE_PROFILES); IPR001876 (PROSITE_PROFILES); IPR036443 (SUPERFAMILY); IPR036443 (SUPERFAMILY)	no GO terms	no GO terms
HSK10369_c0_g1_i1	LDLR chaperone MESD	971	20	5.51284e-128	78.21	2	P:GO:0006457; C:GO:0016020	P:protein folding; C:membrane			IPR019330 (PFAM); G3DSA:3.30.70.260 (GENE3D); mobidb-lite (MOBIDB_LITE); PTHR36357 (PANTHER)	P:GO:0006457	P:protein folding
HSK10369_c0_g1_i2	LDLR chaperone MESD	515	20	6.47961e-28	82.28	1	P:GO:0006457	P:protein folding			mobidb-lite (MOBIDB_LITE); PTHR36357 (PANTHER)	no GO terms	no GO terms
HSK10370_c0_g1_i1	---NA---	260									no IPS match	no IPS match	no IPS match
HSK10370_c0_g1_i2	---NA---	263									no IPS match	no IPS match	no IPS match
HSK10371_c0_g1_i1	glucan endo-1,3-beta-D-glucosidase	725	20	5.49843e-71	82.24	1	F:GO:0016787	F:hydrolase activity			IPR012946 (PFAM); PTHR31044 (PANTHER)	no GO terms	no GO terms
HSK10372_c0_g1_i1	protein DETOXIFICATION 16	2043	20	0	85.82	4	P:GO:0006855; F:GO:0015238; F:GO:0015297; C:GO:0016021	P:drug transmembrane transport; F:drug transmembrane transporter activity; F:antiporter activity; C:integral component of membrane			IPR002528 (PFAM); IPR002528 (TIGRFAM); PTHR11206:SF173 (PANTHER); PTHR11206 (PANTHER); cd13132 (CDD)	P:GO:0006855; F:GO:0015238; F:GO:0015297; C:GO:0016020; P:GO:0055085	P:drug transmembrane transport; F:drug transmembrane transporter activity; F:antiporter activity; C:membrane; P:transmembrane transport
HSK10372_c0_g1_i2	protein DETOXIFICATION 16-like	2066	20	0	88.82	4	P:GO:0006855; F:GO:0015238; F:GO:0015297; C:GO:0016021	P:drug transmembrane transport; F:drug transmembrane transporter activity; F:antiporter activity; C:integral component of membrane			IPR002528 (PFAM); IPR002528 (TIGRFAM); PTHR11206:SF173 (PANTHER); PTHR11206 (PANTHER); cd13132 (CDD)	P:GO:0006855; F:GO:0015238; F:GO:0015297; C:GO:0016020; P:GO:0055085	P:drug transmembrane transport; F:drug transmembrane transporter activity; F:antiporter activity; C:membrane; P:transmembrane transport
HSK10373_c0_g1_i1	tRNA ligase 1 isoform X6	789	20	7.04988e-179	89.12	3	F:GO:0003972; F:GO:0005524; P:GO:0006388	F:RNA ligase (ATP) activity; F:ATP binding; P:tRNA splicing, via endonucleolytic cleavage and ligation	EC:6.5.1.3	RNA ligase (ATP)	IPR015965 (PFAM); PTHR35460 (PANTHER)	F:GO:0003972; F:GO:0005524; P:GO:0006388	F:RNA ligase (ATP) activity; F:ATP binding; P:tRNA splicing, via endonucleolytic cleavage and ligation
HSK10374_c0_g1_i1	protein TSS-like	248	20	1.41622e-50	94.23						IPR028275 (PFAM); PTHR12601:SF18 (PANTHER); PTHR12601 (PANTHER)	no GO terms	no GO terms
HSK10374_c1_g1_i1	protein TSS isoform X1	266	20	6.28891e-34	91.02						no IPS match	no IPS match	no IPS match
HSK10375_c0_g1_i1	ATPase family AAA domain-containing protein 3-like	1344	20	3.89699e-58	64.07	2	F:GO:0005524; F:GO:0016787	F:ATP binding; F:hydrolase activity			mobidb-lite (MOBIDB_LITE)	no GO terms	no GO terms
HSK10376_c0_g1_i1	---NA---	388									no IPS match	no IPS match	no IPS match
HSK10376_c0_g1_i2	hypothetical protein CICLE_v10003897mg	1535	2	3.80852e-41	84.4	1	C:GO:0016020	C:membrane			no IPS match	no IPS match	no IPS match
HSK10376_c0_g1_i3	---NA---	779									no IPS match	no IPS match	no IPS match
HSK10377_c0_g1_i1	HVA22-like protein k	1053	20	7.11327e-138	84.09	1	C:GO:0016021	C:integral component of membrane			IPR004345 (PFAM); mobidb-lite (MOBIDB_LITE); PTHR12300:SF66 (PANTHER); IPR004345 (PANTHER)	no GO terms	no GO terms
HSK10377_c0_g1_i2	HVA22-like protein k	811	20	1.01536e-60	70.48	1	C:GO:0016020	C:membrane			mobidb-lite (MOBIDB_LITE); PTHR12300:SF60 (PANTHER); IPR004345 (PANTHER)	no GO terms	no GO terms
HSK10378_c0_g1_i1	hypothetical protein CICLE_v10003642mg	520	2	6.17558e-32	99.29	1	C:GO:0016021	C:integral component of membrane			no IPS match	no IPS match	no IPS match
HSK10379_c0_g1_i1	GDSL esterase/lipase 1	1256	20	0	83.08	3	C:GO:0016021; P:GO:0016042; F:GO:0016298	C:integral component of membrane; P:lipid catabolic process; F:lipase activity			IPR001087 (PFAM); IPR036514 (G3DSA:3.40.50.GENE3D); PTHR22835:SF301 (PANTHER); PTHR22835 (PANTHER); IPR035669 (CDD); SSF52266 (SUPERFAMILY)	F:GO:0016788	F:hydrolase activity, acting on ester bonds
HSK10379_c0_g1_i2	GDSL esterase/lipase 1	827	20	3.59307e-165	82.55	3	C:GO:0016021; P:GO:0016042; F:GO:0016298	C:integral component of membrane; P:lipid catabolic process; F:lipase activity			IPR001087 (PFAM); IPR036514 (G3DSA:3.40.50.GENE3D); PTHR22835 (PANTHER); PTHR22835:SF301 (PANTHER)	F:GO:0016788	F:hydrolase activity, acting on ester bonds
HSK10380_c0_g1_i1	hypothetical protein MANES_02G064800	429	20	2.99159e-31	95.2						PTHR34563:SF1 (PANTHER); PTHR34563 (PANTHER)	no GO terms	no GO terms
HSK10380_c0_g1_i2	hypothetical protein MANES_02G064800	377	20	9.66506e-32	95.2						PTHR34563 (PANTHER); PTHR34563:SF1 (PANTHER)	no GO terms	no GO terms
HSK10381_c0_g1_i1	---NA---	536									no IPS match	no IPS match	no IPS match
HSK10381_c0_g1_i2	---NA---	927									no IPS match	no IPS match	no IPS match
HSK10382_c0_g1_i1	---NA---	438									no IPS match	no IPS match	no IPS match
HSK10383_c0_g1_i1	pentatricopeptide repeat-containing protein At3g04750, mitochondrial	836	20	1.30231e-146	86.79	7	F:GO:0003723; F:GO:0004519; F:GO:0005515; C:GO:0009507; P:GO:0031425; P:GO:0090305; P:GO:1900865	F:RNA binding; F:endonuclease activity; F:protein binding; C:chloroplast; P:chloroplast RNA processing; P:nucleic acid phosphodiester bond hydrolysis; P:chloroplast RNA modification			IPR002885 (TIGRFAM); IPR011990 (G3DSA:1.25.40.GENE3D); IPR002885 (PFAM); IPR002885 (PFAM); PTHR24015:SF794 (PANTHER); PTHR24015 (PANTHER); IPR002885 (PROSITE_PROFILES); IPR002885 (PROSITE_PROFILES); IPR002885 (PROSITE_PROFILES); IPR002885 (PROSITE_PROFILES)	F:GO:0005515	F:protein binding
HSK10383_c0_g1_i2	pentatricopeptide repeat-containing protein At3g04750, mitochondrial	778	20	3.39037e-179	86.62	7	F:GO:0003723; F:GO:0004519; F:GO:0005515; C:GO:0009507; P:GO:0031425; P:GO:0090305; P:GO:1900865	F:RNA binding; F:endonuclease activity; F:protein binding; C:chloroplast; P:chloroplast RNA processing; P:nucleic acid phosphodiester bond hydrolysis; P:chloroplast RNA modification			IPR002885 (PFAM); IPR011990 (G3DSA:1.25.40.GENE3D); IPR002885 (TIGRFAM); IPR002885 (PFAM); IPR011990 (G3DSA:1.25.40.GENE3D); PTHR24015 (PANTHER); PTHR24015:SF794 (PANTHER); IPR002885 (PROSITE_PROFILES); IPR002885 (PROSITE_PROFILES); IPR002885 (PROSITE_PROFILES); IPR002885 (PROSITE_PROFILES); IPR002885 (PROSITE_PROFILES); IPR002885 (PROSITE_PROFILES)	F:GO:0005515	F:protein binding
HSK10383_c0_g2_i1	pentatricopeptide repeat-containing protein At3g04750, mitochondrial	244	20	8.63891e-32	80.94	5	F:GO:0003723; F:GO:0004519; C:GO:0009507; P:GO:0031425; P:GO:1900865	F:RNA binding; F:endonuclease activity; C:chloroplast; P:chloroplast RNA processing; P:chloroplast RNA modification			no IPS match	no IPS match	no IPS match
HSK10384_c0_g1_i1	phosphatidylinositol N-acetylglucosaminyltransferase subunit C	1272	20	0	93.01	4	C:GO:0000506; P:GO:0006506; C:GO:0016021; F:GO:0017176	C:glycosylphosphatidylinositol-N-acetylglucosaminyltransferase (GPI-GnT) complex; P:GPI anchor biosynthetic process; C:integral component of membrane; F:phosphatidylinositol N-acetylglucosaminyltransferase activity	EC:2.4.1.198	Phosphatidylinositol N-acetylglucosaminyltransferase	IPR009450 (PIRSF); IPR009450 (PFAM); IPR009450 (PANTHER)	P:GO:0006506; C:GO:0016021; F:GO:0017176	P:GPI anchor biosynthetic process; C:integral component of membrane; F:phosphatidylinositol N-acetylglucosaminyltransferase activity
HSK10384_c0_g1_i2	phosphatidylinositol N-acetylglucosaminyltransferase subunit C	1120	20	0	93.01	4	C:GO:0000506; P:GO:0006506; C:GO:0016021; F:GO:0017176	C:glycosylphosphatidylinositol-N-acetylglucosaminyltransferase (GPI-GnT) complex; P:GPI anchor biosynthetic process; C:integral component of membrane; F:phosphatidylinositol N-acetylglucosaminyltransferase activity	EC:2.4.1.198	Phosphatidylinositol N-acetylglucosaminyltransferase	IPR009450 (PIRSF); IPR009450 (PFAM); IPR009450 (PANTHER)	P:GO:0006506; C:GO:0016021; F:GO:0017176	P:GPI anchor biosynthetic process; C:integral component of membrane; F:phosphatidylinositol N-acetylglucosaminyltransferase activity
HSK10385_c0_g1_i1	CTP_transf_2 domain-containing protein	1463	20	0	92.14	2	P:GO:0009058; F:GO:0016740	P:biosynthetic process; F:transferase activity			IPR004821 (PFAM); IPR014729 (G3DSA:3.40.50.GENE3D); PTHR31285 (PANTHER); SSF52374 (SUPERFAMILY)	F:GO:0003824; P:GO:0009058	F:catalytic activity; P:biosynthetic process
HSK10385_c0_g1_i2	CTP_transf_2 domain-containing protein	1477	20	0	90.28	2	P:GO:0009058; F:GO:0016740	P:biosynthetic process; F:transferase activity			IPR014729 (G3DSA:3.40.50.GENE3D); IPR004821 (PFAM); PTHR31285 (PANTHER); SSF52374 (SUPERFAMILY)	F:GO:0003824; P:GO:0009058	F:catalytic activity; P:biosynthetic process
HSK10385_c0_g1_i3	Nucleotidylyl transferase superfamily protein	1353	20	0	93.34	2	P:GO:0009058; F:GO:0016740	P:biosynthetic process; F:transferase activity			PTHR31285 (PANTHER); SSF52374 (SUPERFAMILY)	no GO terms	no GO terms
HSK10385_c0_g1_i4	Nucleotidylyl transferase superfamily protein	561	20	1.10928e-43	90.32	3	C:GO:0005634; P:GO:0009058; F:GO:0016740	C:nucleus; P:biosynthetic process; F:transferase activity			no IPS match	no IPS match	no IPS match
HSK10386_c0_g1_i1	coiled-coil-helix-coiled-coil-helix domain-containing protein 10, mitochondrial-like	786	20	3.99174e-62	91.2						IPR010625 (PFAM); mobidb-lite (MOBIDB_LITE); PTHR13523 (PANTHER); PTHR13523:SF9 (PANTHER)	no GO terms	no GO terms
HSK10387_c0_g1_i1	HAT transposon superfamily	423	20	4.28458e-98	95.21	2	F:GO:0003677; F:GO:0046983	F:DNA binding; F:protein dimerization activity			IPR008906 (PFAM); PTHR32166 (PANTHER); PTHR32166:SF29 (PANTHER); IPR012337 (SUPERFAMILY)	F:GO:0046983	F:protein dimerization activity
HSK10387_c0_g2_i1	HAT transposon superfamily	1014	20	0	92.85	5	F:GO:0003677; C:GO:0009522; P:GO:0015979; C:GO:0016021; F:GO:0046983	F:DNA binding; C:photosystem I; P:photosynthesis; C:integral component of membrane; F:protein dimerization activity			IPR007021 (PFAM); PTHR32166:SF29 (PANTHER); PTHR32166 (PANTHER); IPR012337 (SUPERFAMILY)	no GO terms	no GO terms
HSK10388_c0_g1_i1	hypothetical protein CICLE_v10033160mg	605	20	5.94359e-47	73.12	1	C:GO:0016021	C:integral component of membrane			mobidb-lite (MOBIDB_LITE); PTHR37263 (PANTHER)	no GO terms	no GO terms
HSK10389_c0_g1_i1	ethylene-responsive transcription factor ERF053-like	2342	20	0	75.75	6	F:GO:0003677; F:GO:0003700; C:GO:0005634; C:GO:0005667; P:GO:0006355; P:GO:0006355	F:DNA binding; F:DNA binding transcription factor activity; C:nucleus; C:transcription factor complex; P:regulation of transcription, DNA-templated; P:regulation of transcription, DNA-templated			IPR001471 (PRINTS); IPR001471 (PFAM); IPR036955 (G3DSA:3.30.730.GENE3D); mobidb-lite (MOBIDB_LITE); mobidb-lite (MOBIDB_LITE); mobidb-lite (MOBIDB_LITE); mobidb-lite (MOBIDB_LITE); PTHR31657 (PANTHER); PTHR31657:SF19 (PANTHER); IPR001471 (PROSITE_PROFILES); IPR001471 (CDD); IPR016177 (SUPERFAMILY)	F:GO:0003677; F:GO:0003700; P:GO:0006355	F:DNA binding; F:DNA binding transcription factor activity; P:regulation of transcription, DNA-templated
HSK1039_c0_g1_i1	DNA double-strand break repair rad50 ATPase	484	20	5.96783e-35	89.67	2	C:GO:0005747; C:GO:0016021	C:mitochondrial respiratory chain complex I; C:integral component of membrane			mobidb-lite (MOBIDB_LITE); PTHR35135:SF1 (PANTHER); PTHR35135 (PANTHER)	no GO terms	no GO terms
HSK10390_c0_g1_i1	ABC transporter A family member 2	1150	20	0	90.94	4	F:GO:0005524; C:GO:0016021; F:GO:0042626; P:GO:0055085	F:ATP binding; C:integral component of membrane; F:ATPase activity, coupled to transmembrane movement of substances; P:transmembrane transport	EC:3.6.1.3; EC:3.6.1.15	Adenosinetriphosphatase; Nucleoside-triphosphate phosphatase	IPR003959 (PFAM); G3DSA:3.40.50.300 (GENE3D); PTHR19229:SF193 (PANTHER); IPR026082 (PANTHER); IPR027417 (SUPERFAMILY)	F:GO:0005524; C:GO:0016021; F:GO:0042626; P:GO:0055085	F:ATP binding; C:integral component of membrane; F:ATPase activity, coupled to transmembrane movement of substances; P:transmembrane transport
HSK10391_c0_g1_i1	hypothetical protein CUMW_049100	820	3	1.8936e-87	99.23	1	P:GO:0007165	P:signal transduction			mobidb-lite (MOBIDB_LITE); mobidb-lite (MOBIDB_LITE)	no GO terms	no GO terms
HSK10391_c0_g2_i1	ninja-family protein mc410	623	20	9.40107e-130	67.22	1	P:GO:0007165	P:signal transduction			no IPS match	no IPS match	no IPS match
HSK10391_c0_g3_i1	ninja-family protein 1-like	248	20	1.75045e-52	64.7	1	P:GO:0007165	P:signal transduction			mobidb-lite (MOBIDB_LITE)	no GO terms	no GO terms
HSK10392_c0_g1_i1	Coproporphyrinogen-III oxidase, aerobic	1217	20	1.32274e-126	89.99	2	C:GO:0005886; C:GO:0016021	C:plasma membrane; C:integral component of membrane			IPR009606 (PFAM); PTHR31769:SF3 (PANTHER); PTHR31769 (PANTHER); IPR023471 (SUPERFAMILY)	no GO terms	no GO terms
HSK10393_c0_g1_i1	citrate synthase, glyoxysomal	2085	20	0	94.79	2	P:GO:0006099; F:GO:0046912	P:tricarboxylic acid cycle; F:transferase activity, transferring acyl groups, acyl groups converted into alkyl on transfer			IPR002020 (PRINTS); IPR016143 (G3DSA:1.10.230.GENE3D); IPR002020 (PFAM); IPR016142 (G3DSA:1.10.580.GENE3D); IPR024176 (PIRSF); PTHR11739:SF4 (PANTHER); IPR002020 (PANTHER); cd06115 (CDD); IPR036969 (SUPERFAMILY)	F:GO:0046912	F:transferase activity, transferring acyl groups, acyl groups converted into alkyl on transfer
HSK10394_c0_g1_i1	neutral ceramidase	2175	20	0	92.25	5	F:GO:0003735; C:GO:0005840; P:GO:0006412; C:GO:0016021; P:GO:0042254	F:structural constituent of ribosome; C:ribosome; P:translation; C:integral component of membrane; P:ribosome biogenesis			IPR031329 (PFAM); IPR006823 (PANTHER); PTHR12670:SF6 (PANTHER)	no GO terms	no GO terms
HSK10395_c0_g1_i1	probable glutathione S-transferase	624	20	1.54e-77	88.88	8	F:GO:0004364; F:GO:0004462; C:GO:0005737; P:GO:0005975; P:GO:0006090; P:GO:0006749; P:GO:0006803; P:GO:0009407	F:glutathione transferase activity; F:lactoylglutathione lyase activity; C:cytoplasm; P:carbohydrate metabolic process; P:pyruvate metabolic process; P:glutathione metabolic process; P:obsolete glutathione conjugation reaction; P:toxin catabolic process	EC:2.5.1.18; EC:4.4.1.5	Glutathione transferase; Lactoylglutathione lyase	PF13410 (PFAM); G3DSA:1.20.1050.10 (GENE3D); PTHR11260 (PANTHER); PTHR11260:SF482 (PANTHER); IPR036282 (SUPERFAMILY)	no GO terms	no GO terms
HSK10396_c0_g1_i1	transcription factor MYB1	1724	20	6.83553e-153	86.68	10	F:GO:0003677; C:GO:0005634; C:GO:0005737; P:GO:0009651; P:GO:0009723; P:GO:0009733; P:GO:0009737; P:GO:0009739; P:GO:0009751; P:GO:0009753	F:DNA binding; C:nucleus; C:cytoplasm; P:response to salt stress; P:response to ethylene; P:response to auxin; P:response to abscisic acid; P:response to gibberellin; P:response to salicylic acid; P:response to jasmonic acid			G3DSA:1.10.10.60 (GENE3D); IPR001005 (PFAM); G3DSA:1.10.10.60 (GENE3D); mobidb-lite (MOBIDB_LITE); mobidb-lite (MOBIDB_LITE); PTHR10641:SF524 (PANTHER); PTHR10641 (PANTHER); IPR017930 (PROSITE_PROFILES); IPR017930 (PROSITE_PROFILES); IPR001005 (CDD); IPR001005 (CDD); IPR009057 (SUPERFAMILY)	F:GO:0003677	F:DNA binding
HSK10397_c0_g1_i1	serine/threonine-protein kinase haspin homolog	996	20	0	91.24	8	P:GO:0000278; F:GO:0005524; C:GO:0005634; C:GO:0005737; F:GO:0035402; P:GO:0035407; F:GO:0072354; P:GO:0072355	P:mitotic cell cycle; F:ATP binding; C:nucleus; C:cytoplasm; F:histone kinase activity (H3-T11 specific); P:histone H3-T11 phosphorylation; F:histone kinase activity (H3-T3 specific); P:histone H3-T3 phosphorylation	EC:2.7.11	Transferring phosphorus-containing groups	PF12330 (PFAM); G3DSA:1.10.510.10 (GENE3D); G3DSA:3.30.200.20 (GENE3D); PTHR24419 (PANTHER); PTHR24419:SF18 (PANTHER); IPR011009 (SUPERFAMILY)	no GO terms	no GO terms
HSK10397_c0_g1_i2	serine/threonine-protein kinase haspin homolog	716	20	1.81923e-128	92.74	3	F:GO:0004672; F:GO:0005524; P:GO:0006468	F:protein kinase activity; F:ATP binding; P:protein phosphorylation			G3DSA:1.10.510.10 (GENE3D); PF12330 (PFAM); PTHR24419:SF18 (PANTHER); PTHR24419 (PANTHER); IPR000719 (PROSITE_PROFILES); IPR011009 (SUPERFAMILY)	F:GO:0004672; F:GO:0005524; P:GO:0006468	F:protein kinase activity; F:ATP binding; P:protein phosphorylation
HSK10398_c0_g1_i1	---NA---	206									no IPS match	no IPS match	no IPS match
HSK10398_c0_g2_i1	---NA---	452									no IPS match	no IPS match	no IPS match
HSK10398_c0_g3_i1	---NA---	270									no IPS match	no IPS match	no IPS match
HSK10399_c0_g1_i1	---NA---	618									mobidb-lite (MOBIDB_LITE)	no GO terms	no GO terms
HSK10400_c0_g1_i1	probable pinoresinol-lariciresinol reductase 3	1004	20	0	89.2	3	P:GO:0009813; F:GO:0047526; P:GO:0055114	P:flavonoid biosynthetic process; F:2'-hydroxyisoflavone reductase activity; P:oxidation-reduction process	EC:1.3.1.45	2'-hydroxyisoflavone reductase	IPR008030 (PFAM); G3DSA:3.40.50.720 (GENE3D); G3DSA:3.90.25.10 (GENE3D); PTHR43349:SF8 (PANTHER); PTHR43349 (PANTHER); cd05259 (CDD); IPR036291 (SUPERFAMILY)	no GO terms	no GO terms
HSK10400_c0_g2_i1	probable pinoresinol-lariciresinol reductase 3	367	20	1.89894e-43	80.95	3	P:GO:0009813; F:GO:0047526; P:GO:0055114	P:flavonoid biosynthetic process; F:2'-hydroxyisoflavone reductase activity; P:oxidation-reduction process	EC:1.3.1.45	2'-hydroxyisoflavone reductase	G3DSA:3.90.25.10 (GENE3D); IPR008030 (PFAM); G3DSA:3.40.50.720 (GENE3D); PTHR43349:SF8 (PANTHER); PTHR43349 (PANTHER); IPR036291 (SUPERFAMILY)	no GO terms	no GO terms
HSK10401_c0_g1_i1	tRNA pseudouridine synthase A isoform X2	408	20	2.3433e-62	93.02	4	P:GO:0001522; F:GO:0003723; P:GO:0008033; F:GO:0009982	P:pseudouridine synthesis; F:RNA binding; P:tRNA processing; F:pseudouridine synthase activity	EC:5.4.99.12	tRNA pseudouridine(38-40) synthase	IPR020095 (G3DSA:3.30.70.GENE3D); IPR001406 (PANTHER); PTHR11142:SF0 (PANTHER); IPR020103 (SUPERFAMILY)	P:GO:0001522; F:GO:0003723; P:GO:0009451; F:GO:0009982	P:pseudouridine synthesis; F:RNA binding; P:RNA modification; F:pseudouridine synthase activity
HSK10401_c0_g1_i2	tRNA pseudouridine synthase A isoform X2	1037	20	2.49904e-176	83.9	3	F:GO:0003723; F:GO:0009982; P:GO:0031119	F:RNA binding; F:pseudouridine synthase activity; P:tRNA pseudouridine synthesis	EC:5.4.99.12	tRNA pseudouridine(38-40) synthase	IPR001406 (PIRSF); IPR020097 (PFAM); mobidb-lite (MOBIDB_LITE); PTHR11142:SF0 (PANTHER); IPR001406 (PANTHER); IPR020103 (SUPERFAMILY)	P:GO:0001522; F:GO:0003723; P:GO:0009451; F:GO:0009982	P:pseudouridine synthesis; F:RNA binding; P:RNA modification; F:pseudouridine synthase activity
HSK10402_c0_g1_i1	hypothetical protein CICLE_v10009151mg	777	20	8.05141e-122	85.02	1	C:GO:0016021	C:integral component of membrane			IPR021434 (PFAM); PTHR35733 (PANTHER)	no GO terms	no GO terms
HSK10402_c0_g1_i2	hypothetical protein CICLE_v10009151mg	911	20	3.65807e-175	84.79	1	C:GO:0016021	C:integral component of membrane			IPR021434 (PFAM); mobidb-lite (MOBIDB_LITE); PTHR35733 (PANTHER)	no GO terms	no GO terms
HSK10403_c0_g1_i1	---NA---	391									no IPS match	no IPS match	no IPS match
HSK10403_c0_g1_i2	hypothetical protein CUMW_142010	265	1	5.4383e-17	100	3	F:GO:0005509; C:GO:0016021; P:GO:0055085	F:calcium ion binding; C:integral component of membrane; P:transmembrane transport			no IPS match	no IPS match	no IPS match
HSK10404_c0_g1_i1	tRNA modification GTPase MnmE	833	20	1.50756e-157	93.06	4	F:GO:0003924; F:GO:0005525; C:GO:0005622; P:GO:0006400	F:GTPase activity; F:GTP binding; C:intracellular; P:tRNA modification	EC:3.6.1.15	Nucleoside-triphosphate phosphatase	IPR027368 (G3DSA:1.20.120.GENE3D); G3DSA:3.40.50.300 (GENE3D); IPR025867 (PFAM); PTHR42714:SF1 (PANTHER); PTHR42714 (PANTHER); IPR027417 (SUPERFAMILY); SSF116878 (SUPERFAMILY)	no GO terms	no GO terms
HSK10404_c0_g2_i1	tRNA modification GTPase MnmE	905	20	2.41279e-175	83.11	5	F:GO:0003924; F:GO:0005515; F:GO:0005525; C:GO:0005622; P:GO:0006400	F:GTPase activity; F:protein binding; F:GTP binding; C:intracellular; P:tRNA modification	EC:3.6.1.15	Nucleoside-triphosphate phosphatase	IPR027266 (G3DSA:3.30.1360.GENE3D); IPR018948 (PFAM); IPR027368 (G3DSA:1.20.120.GENE3D); IPR025867 (PFAM); PTHR42714 (PANTHER); PTHR42714:SF1 (PANTHER); SSF116878 (SUPERFAMILY); SSF103025 (SUPERFAMILY)	F:GO:0005515	F:protein binding
HSK10405_c0_g1_i1	2-alkenal reductase (NADP(+)-dependent)-like	1187	20	0	92.36	2	F:GO:0016491; P:GO:0055114	F:oxidoreductase activity; P:oxidation-reduction process			G3DSA:3.90.180.10 (GENE3D); PF16884 (PFAM); G3DSA:3.40.50.720 (GENE3D); IPR013149 (PFAM); PTHR43205:SF9 (PANTHER); PTHR43205 (PANTHER); cd08295 (CDD); IPR036291 (SUPERFAMILY); IPR011032 (SUPERFAMILY)	P:GO:0055114	P:oxidation-reduction process
HSK10405_c0_g1_i2	2-alkenal reductase (NADP(+)-dependent)-like	334	20	9.6437e-74	97.07	2	F:GO:0016491; P:GO:0055114	F:oxidoreductase activity; P:oxidation-reduction process			G3DSA:3.40.50.720 (GENE3D); IPR013149 (PFAM); PTHR43205:SF9 (PANTHER); PTHR43205 (PANTHER); IPR036291 (SUPERFAMILY)	P:GO:0055114	P:oxidation-reduction process
HSK10406_c0_g1_i1	protein split ends-like	800	20	1.22226e-75	79.92						mobidb-lite (MOBIDB_LITE); mobidb-lite (MOBIDB_LITE); PTHR31016:SF3 (PANTHER); PTHR31016 (PANTHER)	no GO terms	no GO terms
HSK10406_c0_g1_i2	protein split ends-like	1784	20	9.0399e-180	93.48						mobidb-lite (MOBIDB_LITE); mobidb-lite (MOBIDB_LITE); PTHR31016 (PANTHER); PTHR31016:SF3 (PANTHER)	no GO terms	no GO terms
HSK10406_c0_g1_i3	protein split ends-like	1770	20	0	85.47						mobidb-lite (MOBIDB_LITE); mobidb-lite (MOBIDB_LITE); mobidb-lite (MOBIDB_LITE); PTHR31016:SF3 (PANTHER); PTHR31016 (PANTHER)	no GO terms	no GO terms
HSK10407_c0_g1_i1	uncharacterized GTP-binding protein YjiA-like	427	20	4.86706e-76	90.24	3	F:GO:0003677; C:GO:0005634; P:GO:0006355	F:DNA binding; C:nucleus; P:regulation of transcription, DNA-templated			IPR011629 (PFAM); IPR036627 (G3DSA:3.30.1220.GENE3D); PTHR13748:SF40 (PANTHER); PTHR13748 (PANTHER); SSF90002 (SUPERFAMILY)	no GO terms	no GO terms
HSK10407_c0_g2_i1	uncharacterized GTP-binding protein YjiA-like	836	20	1.29945e-176	83.31						IPR003495 (PFAM); G3DSA:3.40.50.300 (GENE3D); mobidb-lite (MOBIDB_LITE); PTHR13748:SF40 (PANTHER); PTHR13748 (PANTHER); IPR027417 (SUPERFAMILY)	no GO terms	no GO terms
HSK10408_c0_g1_i1	hypothetical protein CICLE_v10030487mg	859	20	0	81.07						PTHR32387 (PANTHER); PTHR32387:SF3 (PANTHER)	no GO terms	no GO terms
HSK10409_c0_g1_i1	NADH dehydrogenase [ubiquinone] 1 beta subcomplex subunit 7-like	727	20	1.43462e-68	91.89	6	C:GO:0005739; P:GO:0006120; P:GO:0006744; P:GO:0006814; F:GO:0008137; P:GO:1902600	C:mitochondrion; P:mitochondrial electron transport, NADH to ubiquinone; P:ubiquinone biosynthetic process; P:sodium ion transport; F:NADH dehydrogenase (ubiquinone) activity; P:proton transmembrane transport	EC:1.6.99.5; EC:1.6.99.3; EC:1.6.5.3	Acting on NADH or NADPH; NADH dehydrogenase; NADH:ubiquinone reductase (H(+)-translocating)	IPR008698 (PFAM); mobidb-lite (MOBIDB_LITE); IPR008698 (PANTHER); PS51808 (PROSITE_PROFILES)	F:GO:0003954; C:GO:0005739; F:GO:0008137	F:NADH dehydrogenase activity; C:mitochondrion; F:NADH dehydrogenase (ubiquinone) activity
HSK10409_c0_g1_i2	NADH dehydrogenase [ubiquinone] 1 beta subcomplex subunit 7-like	693	20	9.33919e-69	91.89	6	C:GO:0005739; P:GO:0006120; P:GO:0006744; P:GO:0006814; F:GO:0008137; P:GO:1902600	C:mitochondrion; P:mitochondrial electron transport, NADH to ubiquinone; P:ubiquinone biosynthetic process; P:sodium ion transport; F:NADH dehydrogenase (ubiquinone) activity; P:proton transmembrane transport	EC:1.6.99.5; EC:1.6.99.3; EC:1.6.5.3	Acting on NADH or NADPH; NADH dehydrogenase; NADH:ubiquinone reductase (H(+)-translocating)	IPR008698 (PFAM); mobidb-lite (MOBIDB_LITE); IPR008698 (PANTHER); PS51808 (PROSITE_PROFILES)	F:GO:0003954; C:GO:0005739; F:GO:0008137	F:NADH dehydrogenase activity; C:mitochondrion; F:NADH dehydrogenase (ubiquinone) activity
HSK1041_c0_g1_i1	---NA---	671									mobidb-lite (MOBIDB_LITE)	no GO terms	no GO terms
HSK10410_c0_g1_i1	hypothetical protein CISIN_1g034725mg	215	1	1.93149e-20	98.08						no IPS match	no IPS match	no IPS match
HSK10410_c0_g2_i1	G-box-binding factor 1-like	341	7	2.2747e-24	61.19						no IPS match	no IPS match	no IPS match
HSK10411_c0_g1_i1	DNA-directed RNA polymerase I subunit 1	1873	20	0	75.75	5	F:GO:0001054; F:GO:0003677; C:GO:0005736; P:GO:0006351; F:GO:0008270	F:RNA polymerase I activity; F:DNA binding; C:DNA-directed RNA polymerase I complex; P:transcription, DNA-templated; F:zinc ion binding	EC:2.7.7.6	DNA-directed RNA polymerase	IPR007081 (PFAM); G3DSA:3.30.70.2850 (GENE3D); G3DSA:1.10.150.390 (GENE3D); mobidb-lite (MOBIDB_LITE); mobidb-lite (MOBIDB_LITE); PTHR19376 (PANTHER); IPR015699 (PTHR19376:PANTHER); cd02735 (CDD); SSF64484 (SUPERFAMILY)	F:GO:0003677; F:GO:0003899; C:GO:0005634; P:GO:0006351; F:GO:0008270	F:DNA binding; F:DNA-directed 5'-3' RNA polymerase activity; C:nucleus; P:transcription, DNA-templated; F:zinc ion binding
HSK10412_c0_g1_i1	translocase of chloroplast 120, chloroplastic-like	998	6	7.56887e-133	82.81	2	F:GO:0005525; F:GO:0016817	F:GTP binding; F:hydrolase activity, acting on acid anhydrides			mobidb-lite (MOBIDB_LITE)	no GO terms	no GO terms
HSK10413_c0_g1_i1	GDSL esterase/lipase At1g71250-like	990	20	0	84.42	2	C:GO:0016020; F:GO:0016788	C:membrane; F:hydrolase activity, acting on ester bonds			IPR036514 (G3DSA:3.40.50.GENE3D); IPR001087 (PFAM); PTHR22835:SF180 (PANTHER); PTHR22835 (PANTHER)	F:GO:0016788	F:hydrolase activity, acting on ester bonds
HSK10413_c0_g1_i2	GDSL esterase/lipase At1g71250-like	1019	20	0	84.56	2	C:GO:0016020; F:GO:0016788	C:membrane; F:hydrolase activity, acting on ester bonds			IPR001087 (PFAM); IPR036514 (G3DSA:3.40.50.GENE3D); PTHR22835:SF180 (PANTHER); PTHR22835 (PANTHER)	F:GO:0016788	F:hydrolase activity, acting on ester bonds
HSK10414_c0_g1_i1	methionine--tRNA ligase, chloroplastic/mitochondrial	663	20	2.10457e-161	94.78	6	F:GO:0004825; F:GO:0005524; C:GO:0005739; P:GO:0006431; P:GO:0006555; C:GO:0009570	F:methionine-tRNA ligase activity; F:ATP binding; C:mitochondrion; P:methionyl-tRNA aminoacylation; P:methionine metabolic process; C:chloroplast stroma	EC:6.1.1.10	Methionine--tRNA ligase	IPR033911 (PRINTS); IPR014729 (G3DSA:3.40.50.GENE3D); IPR015413 (PFAM); PTHR43326:SF4 (PANTHER); PTHR43326 (PANTHER); SSF52374 (SUPERFAMILY)	F:GO:0000166; F:GO:0004812; F:GO:0004825; F:GO:0005524; P:GO:0006418; P:GO:0006431	F:nucleotide binding; F:aminoacyl-tRNA ligase activity; F:methionine-tRNA ligase activity; F:ATP binding; P:tRNA aminoacylation for protein translation; P:methionyl-tRNA aminoacylation
HSK10414_c0_g2_i1	methionine--tRNA ligase, chloroplastic/mitochondrial	1103	20	0	91.6	6	F:GO:0004825; F:GO:0005524; C:GO:0005739; P:GO:0006431; P:GO:0006555; C:GO:0009570	F:methionine-tRNA ligase activity; F:ATP binding; C:mitochondrion; P:methionyl-tRNA aminoacylation; P:methionine metabolic process; C:chloroplast stroma	EC:6.1.1.10	Methionine--tRNA ligase	IPR033911 (PRINTS); IPR014729 (G3DSA:3.40.50.GENE3D); IPR013155 (PFAM); IPR015413 (PFAM); G3DSA:1.10.730.10 (GENE3D); PTHR43326:SF4 (PANTHER); PTHR43326 (PANTHER); cd07957 (CDD); IPR009080 (SUPERFAMILY); SSF52374 (SUPERFAMILY)	F:GO:0000166; F:GO:0004812; F:GO:0004825; F:GO:0005524; P:GO:0006418; P:GO:0006431	F:nucleotide binding; F:aminoacyl-tRNA ligase activity; F:methionine-tRNA ligase activity; F:ATP binding; P:tRNA aminoacylation for protein translation; P:methionyl-tRNA aminoacylation
HSK10415_c0_g1_i1	ABC transporter B family member 25, mitochondrial	2555	20	0	93.99	5	F:GO:0005524; P:GO:0006855; F:GO:0008559; C:GO:0016021; P:GO:0042908	F:ATP binding; P:drug transmembrane transport; F:xenobiotic transmembrane transporting ATPase activity; C:integral component of membrane; P:xenobiotic transport	EC:3.6.1.3; EC:3.6.3.44; EC:3.6.1.15	Adenosinetriphosphatase; Xenobiotic-transporting ATPase; Nucleoside-triphosphate phosphatase	IPR003439 (PFAM); IPR036640 (G3DSA:1.20.1560.GENE3D); IPR011527 (PFAM); G3DSA:3.40.50.300 (GENE3D); PTHR24221:SF187 (PANTHER); PTHR24221 (PANTHER); IPR003439 (PROSITE_PROFILES); IPR011527 (PROSITE_PROFILES); cd03253 (CDD); IPR027417 (SUPERFAMILY); IPR036640 (SUPERFAMILY)	F:GO:0005524; C:GO:0016021; F:GO:0016887; F:GO:0042626; P:GO:0055085	F:ATP binding; C:integral component of membrane; F:ATPase activity; F:ATPase activity, coupled to transmembrane movement of substances; P:transmembrane transport
HSK10415_c0_g1_i2	ABC transporter B family member 25, mitochondrial	2630	20	0	90.5	5	F:GO:0005524; P:GO:0006855; F:GO:0008559; C:GO:0016021; P:GO:0042908	F:ATP binding; P:drug transmembrane transport; F:xenobiotic transmembrane transporting ATPase activity; C:integral component of membrane; P:xenobiotic transport	EC:3.6.1.3; EC:3.6.3.44; EC:3.6.1.15	Adenosinetriphosphatase; Xenobiotic-transporting ATPase; Nucleoside-triphosphate phosphatase	IPR036640 (G3DSA:1.20.1560.GENE3D); IPR011527 (PFAM); IPR003439 (PFAM); G3DSA:3.40.50.300 (GENE3D); PTHR24221:SF187 (PANTHER); PTHR24221 (PANTHER); IPR011527 (PROSITE_PROFILES); IPR003439 (PROSITE_PROFILES); cd03253 (CDD); IPR027417 (SUPERFAMILY); IPR036640 (SUPERFAMILY)	F:GO:0005524; C:GO:0016021; F:GO:0016887; F:GO:0042626; P:GO:0055085	F:ATP binding; C:integral component of membrane; F:ATPase activity; F:ATPase activity, coupled to transmembrane movement of substances; P:transmembrane transport
HSK10415_c0_g1_i3	ABC transporter B family member 25, mitochondrial	2578	20	0	96.05	5	F:GO:0005524; P:GO:0006855; F:GO:0008559; C:GO:0016021; P:GO:0042908	F:ATP binding; P:drug transmembrane transport; F:xenobiotic transmembrane transporting ATPase activity; C:integral component of membrane; P:xenobiotic transport	EC:3.6.1.3; EC:3.6.3.44; EC:3.6.1.15	Adenosinetriphosphatase; Xenobiotic-transporting ATPase; Nucleoside-triphosphate phosphatase	IPR003439 (PFAM); G3DSA:3.40.50.300 (GENE3D); IPR036640 (G3DSA:1.20.1560.GENE3D); IPR011527 (PFAM); PTHR24221:SF187 (PANTHER); PTHR24221 (PANTHER); IPR011527 (PROSITE_PROFILES); IPR003439 (PROSITE_PROFILES); cd03253 (CDD); IPR027417 (SUPERFAMILY); IPR036640 (SUPERFAMILY)	F:GO:0005524; C:GO:0016021; F:GO:0016887; F:GO:0042626; P:GO:0055085	F:ATP binding; C:integral component of membrane; F:ATPase activity; F:ATPase activity, coupled to transmembrane movement of substances; P:transmembrane transport
HSK10416_c0_g1_i1	cytochrome P450 76A2-like	1725	20	0	87.02	6	F:GO:0005506; C:GO:0016021; F:GO:0020037; F:GO:0033772; P:GO:0044550; P:GO:0055114	F:iron ion binding; C:integral component of membrane; F:heme binding; F:flavonoid 3',5'-hydroxylase activity; P:secondary metabolite biosynthetic process; P:oxidation-reduction process	EC:1.14.13; EC:1.14.13.88	Acting on paired donors, with incorporation or reduction of molecular oxygen. The oxygen incorporated need not be derived from O(2); Flavonoid 3',5'-hydroxylase	IPR002401 (PRINTS); IPR001128 (PRINTS); IPR001128 (PFAM); IPR036396 (G3DSA:1.10.630.GENE3D); PTHR24298:SF119 (PANTHER); PTHR24298 (PANTHER); IPR036396 (SUPERFAMILY)	F:GO:0005506; F:GO:0016705; F:GO:0020037; P:GO:0055114	F:iron ion binding; F:oxidoreductase activity, acting on paired donors, with incorporation or reduction of molecular oxygen; F:heme binding; P:oxidation-reduction process
HSK10417_c0_g1_i1	---NA---	430									no IPS match	no IPS match	no IPS match
HSK10418_c0_g1_i1	ribosomal RNA small subunit methyltransferase G	940	20	2.29161e-124	93.29	4	C:GO:0005829; C:GO:0016021; F:GO:0070043; P:GO:0070476	C:cytosol; C:integral component of membrane; F:rRNA (guanine-N7-)-methyltransferase activity; P:rRNA (guanine-N7)-methylation			IPR003682 (PFAM); G3DSA:3.40.50.150 (GENE3D); IPR003682 (PANTHER); IPR029063 (SUPERFAMILY)	C:GO:0005737; P:GO:0006364; F:GO:0008649	C:cytoplasm; P:rRNA processing; F:rRNA methyltransferase activity
HSK10418_c0_g1_i2	ribosomal RNA small subunit methyltransferase G	1093	20	2.5107e-164	83.16	4	C:GO:0005829; C:GO:0016021; F:GO:0070043; P:GO:0070476	C:cytosol; C:integral component of membrane; F:rRNA (guanine-N7-)-methyltransferase activity; P:rRNA (guanine-N7)-methylation			IPR003682 (PFAM); IPR003682 (PIRSF); IPR003682 (TIGRFAM); G3DSA:3.40.50.150 (GENE3D); IPR003682 (PANTHER); IPR003682 (HAMAP); IPR029063 (SUPERFAMILY)	C:GO:0005737; P:GO:0006364; F:GO:0008649	C:cytoplasm; P:rRNA processing; F:rRNA methyltransferase activity
HSK10419_c0_g1_i1	TMV resistance protein N-like	255	20	1.43978e-37	89.89	2	P:GO:0007165; F:GO:0043531	P:signal transduction; F:ADP binding			IPR002182 (PFAM); G3DSA:3.40.50.300 (GENE3D); PTHR11017 (PANTHER); IPR027417 (SUPERFAMILY)	F:GO:0043531	F:ADP binding
HSK10419_c0_g2_i1	TMV resistance protein N-like	205	20	5.73979e-40	91.87	2	P:GO:0007165; F:GO:0043531	P:signal transduction; F:ADP binding			G3DSA:3.40.50.300 (GENE3D)	no GO terms	no GO terms
HSK1042_c0_g1_i1	Adenine nucleotide alpha hydrolases-like superfamily protein, putative	648	20	4.98809e-136	76.1	1	P:GO:0006950	P:response to stress			IPR006016 (PFAM); IPR014729 (G3DSA:3.40.50.GENE3D); mobidb-lite (MOBIDB_LITE); PTHR31964 (PANTHER); PTHR31964:SF39 (PANTHER); cd00293 (CDD); SSF52402 (SUPERFAMILY)	P:GO:0006950	P:response to stress
HSK10420_c0_g1_i1	21 kDa protein	808	20	1.46724e-141	77.66	3	F:GO:0004857; P:GO:0009567; P:GO:0043086	F:enzyme inhibitor activity; P:double fertilization forming a zygote and endosperm; P:negative regulation of catalytic activity			IPR035513 (G3DSA:1.20.140.GENE3D); IPR006501 (PFAM); IPR006501 (TIGRFAM); PTHR31080:SF12 (PANTHER); PTHR31080 (PANTHER); cd15798 (CDD); IPR035513 (SUPERFAMILY)	F:GO:0004857	F:enzyme inhibitor activity
HSK10421_c0_g1_i1	protein N-lysine methyltransferase METTL21A	668	20	3.17602e-110	84.66	2	F:GO:0008168; P:GO:0032259	F:methyltransferase activity; P:methylation			G3DSA:3.40.50.150 (GENE3D); IPR019410 (PFAM); PTHR14614:SF63 (PANTHER); PTHR14614 (PANTHER)	no GO terms	no GO terms
HSK10422_c0_g1_i1	ADP,ATP carrier protein ER-ANT1	1432	20	0	92.18	7	F:GO:0005471; C:GO:0005743; P:GO:0015866; P:GO:0015867; C:GO:0016021; P:GO:0046902; P:GO:0055085	F:ATP:ADP antiporter activity; C:mitochondrial inner membrane; P:ADP transport; P:ATP transport; C:integral component of membrane; P:regulation of mitochondrial membrane permeability; P:transmembrane transport			IPR002113 (PRINTS); IPR002067 (PRINTS); IPR018108 (PFAM); IPR023395 (G3DSA:1.50.40.GENE3D); PTHR24089 (PANTHER); PTHR24089:SF472 (PANTHER); IPR018108 (PROSITE_PROFILES); IPR018108 (PROSITE_PROFILES); IPR018108 (PROSITE_PROFILES); IPR023395 (SUPERFAMILY)	C:GO:0005743; F:GO:0022857; P:GO:0055085	C:mitochondrial inner membrane; F:transmembrane transporter activity; P:transmembrane transport
HSK10423_c0_g1_i1	PREDICTED: uncharacterized protein LOC102615233	1048	20	2.93975e-166	85.29	1	C:GO:0016021	C:integral component of membrane			PTHR21454 (PANTHER); PTHR21454:SF11 (PANTHER)	no GO terms	no GO terms
HSK10423_c0_g1_i2	PREDICTED: uncharacterized protein LOC102615233	1142	20	7.86423e-169	85.31	1	C:GO:0016021	C:integral component of membrane			PTHR21454 (PANTHER); PTHR21454:SF11 (PANTHER)	no GO terms	no GO terms
HSK10424_c0_g1_i1	protein DGS1, mitochondrial	462	20	5.51209e-83	80.72	1	C:GO:0016021	C:integral component of membrane			no IPS match	no IPS match	no IPS match
HSK10424_c0_g2_i1	protein DGS1, mitochondrial	539	20	1.06219e-129	90.08	1	C:GO:0016021	C:integral component of membrane			PTHR28234 (PANTHER)	no GO terms	no GO terms
HSK10424_c0_g3_i1	protein DGS1, mitochondrial isoform X1	1051	20	0	93.65	4	C:GO:0005741; C:GO:0016021; P:GO:0019375; P:GO:0050665	C:mitochondrial outer membrane; C:integral component of membrane; P:galactolipid biosynthetic process; P:hydrogen peroxide biosynthetic process			IPR013946 (PFAM); PTHR28234 (PANTHER)	no GO terms	no GO terms
HSK10425_c0_g1_i1	protein DETOXIFICATION 27-like	932	20	5.58905e-177	91.55	4	P:GO:0006855; F:GO:0015238; F:GO:0015297; C:GO:0016021	P:drug transmembrane transport; F:drug transmembrane transporter activity; F:antiporter activity; C:integral component of membrane			IPR002528 (PFAM); PTHR11206:SF130 (PANTHER); PTHR11206 (PANTHER)	P:GO:0006855; F:GO:0015238; F:GO:0015297; C:GO:0016020; P:GO:0055085	P:drug transmembrane transport; F:drug transmembrane transporter activity; F:antiporter activity; C:membrane; P:transmembrane transport
HSK10425_c0_g1_i2	protein DETOXIFICATION 27-like	1004	20	1.57551e-167	84.89	4	P:GO:0006855; F:GO:0015238; F:GO:0015297; C:GO:0016021	P:drug transmembrane transport; F:drug transmembrane transporter activity; F:antiporter activity; C:integral component of membrane			IPR002528 (PFAM); PTHR11206:SF130 (PANTHER); PTHR11206 (PANTHER)	P:GO:0006855; F:GO:0015238; F:GO:0015297; C:GO:0016020; P:GO:0055085	P:drug transmembrane transport; F:drug transmembrane transporter activity; F:antiporter activity; C:membrane; P:transmembrane transport
HSK10425_c0_g1_i3	protein DETOXIFICATION 27-like	875	20	2.80084e-156	84.86	4	P:GO:0006855; F:GO:0015238; F:GO:0015297; C:GO:0016021	P:drug transmembrane transport; F:drug transmembrane transporter activity; F:antiporter activity; C:integral component of membrane			IPR002528 (PFAM); PTHR11206 (PANTHER); PTHR11206:SF130 (PANTHER)	P:GO:0006855; F:GO:0015238; F:GO:0015297; C:GO:0016020; P:GO:0055085	P:drug transmembrane transport; F:drug transmembrane transporter activity; F:antiporter activity; C:membrane; P:transmembrane transport
HSK10425_c0_g1_i4	protein DETOXIFICATION 27-like	1061	20	0	91.27	4	P:GO:0006855; F:GO:0015238; F:GO:0015297; C:GO:0016021	P:drug transmembrane transport; F:drug transmembrane transporter activity; F:antiporter activity; C:integral component of membrane			IPR002528 (PFAM); PTHR11206 (PANTHER); PTHR11206:SF130 (PANTHER)	P:GO:0006855; F:GO:0015238; F:GO:0015297; C:GO:0016020; P:GO:0055085	P:drug transmembrane transport; F:drug transmembrane transporter activity; F:antiporter activity; C:membrane; P:transmembrane transport
HSK10425_c0_g2_i1	protein DETOXIFICATION 27-like	243	20	8.95035e-36	93.09	4	P:GO:0006855; F:GO:0015238; F:GO:0015297; C:GO:0016021	P:drug transmembrane transport; F:drug transmembrane transporter activity; F:antiporter activity; C:integral component of membrane			PTHR11206 (PANTHER); PTHR11206:SF130 (PANTHER)	no GO terms	no GO terms
HSK10426_c0_g1_i1	hypothetical protein CICLE_v10023252mg	625	20	1.31514e-24	93.34	1	C:GO:0016021	C:integral component of membrane			no IPS match	no IPS match	no IPS match
HSK10426_c0_g1_i2	hypothetical protein CICLE_v10023252mg	511	20	4.28793e-25	93.34	1	C:GO:0016021	C:integral component of membrane			no IPS match	no IPS match	no IPS match
HSK10427_c0_g1_i1	SH3 domain-containing protein 3	1539	20	0	91.73	2	F:GO:0005515; C:GO:0030136	F:protein binding; C:clathrin-coated vesicle			PR00499 (PRINTS); IPR027267 (G3DSA:1.20.1270.GENE3D); IPR001452 (PFAM); G3DSA:2.30.30.40 (GENE3D); PTHR44109:SF3 (PANTHER); PTHR44109 (PANTHER); IPR001452 (PROSITE_PROFILES); IPR027267 (SUPERFAMILY); IPR036028 (SUPERFAMILY)	F:GO:0005515	F:protein binding
HSK10428_c0_g1_i1	sister chromatid cohesion protein SCC4 isoform X1	2617	20	0	90.16	5	C:GO:0000785; F:GO:0003690; F:GO:0005515; C:GO:0032116; P:GO:0034088	C:chromatin; F:double-stranded DNA binding; F:protein binding; C:SMC loading complex; P:maintenance of mitotic sister chromatid cohesion			IPR019440 (PFAM); IPR011990 (G3DSA:1.25.40.GENE3D); IPR019440 (PANTHER); IPR011990 (SUPERFAMILY)	F:GO:0005515; P:GO:0007064	F:protein binding; P:mitotic sister chromatid cohesion
HSK10429_c0_g1_i1	PREDICTED: uncharacterized protein LOC102624145	813	20	0	86.59	3	C:GO:0005886; C:GO:0009506; C:GO:0016021	C:plasma membrane; C:plasmodesma; C:integral component of membrane			PTHR31414:SF13 (PANTHER); PTHR31414 (PANTHER)	no GO terms	no GO terms
HSK1043_c0_g1_i1	---NA---	232									no IPS match	no IPS match	no IPS match
HSK10430_c0_g1_i1	replication protein A 32 kDa subunit B-like	283	5	0.000646635	95.45	6	F:GO:0003676; F:GO:0003677; C:GO:0005634; P:GO:0006260; P:GO:0006281; P:GO:0006310	F:nucleic acid binding; F:DNA binding; C:nucleus; P:DNA replication; P:DNA repair; P:DNA recombination			no IPS match	no IPS match	no IPS match
HSK10430_c0_g1_i2	replication protein A 32 kDa subunit B-like	297	2	0.000750866	95.45	6	F:GO:0003676; F:GO:0003677; C:GO:0005634; P:GO:0006260; P:GO:0006281; P:GO:0006310	F:nucleic acid binding; F:DNA binding; C:nucleus; P:DNA replication; P:DNA repair; P:DNA recombination			no IPS match	no IPS match	no IPS match
HSK10430_c0_g2_i1	replication protein A 32 kDa subunit B-like	463	20	1.67866e-111	76.3	5	F:GO:0003677; C:GO:0005634; P:GO:0006260; P:GO:0006281; P:GO:0006310	F:DNA binding; C:nucleus; P:DNA replication; P:DNA repair; P:DNA recombination			IPR014892 (PFAM); G3DSA:2.40.50.140 (GENE3D); PTHR13989 (PANTHER); PTHR13989:SF16 (PANTHER); IPR012340 (SUPERFAMILY)	no GO terms	no GO terms
HSK10431_c0_g1_i1	hypothetical protein CISIN_1g0279442mg	930	20	2.88168e-131	81.23						PTHR36765 (PANTHER)	no GO terms	no GO terms
HSK10432_c0_g1_i1	putative disease resistance RPP13-like protein 2	3899	20	0	71.53	1	F:GO:0043531	F:ADP binding			PR00364 (PRINTS); G3DSA:3.40.50.300 (GENE3D); IPR002182 (PFAM); IPR032675 (G3DSA:3.80.10.GENE3D); mobidb-lite (MOBIDB_LITE); PTHR43886 (PANTHER); PTHR43886 (PANTHER); PTHR43886:SF21 (PANTHER); cd00009 (CDD); IPR027417 (SUPERFAMILY); SSF52058 (SUPERFAMILY); IPR027417 (SUPERFAMILY)	F:GO:0043531	F:ADP binding
HSK10432_c0_g1_i2	hypothetical protein CUMW_255480	285	1	1.21686e-07	100	1	F:GO:0043531	F:ADP binding			no IPS match	no IPS match	no IPS match
HSK10433_c0_g1_i1	nucleolar protein 6	1629	20	0	88.32	6	F:GO:0003723; P:GO:0006364; P:GO:0006409; C:GO:0032040; C:GO:0032545; C:GO:0034456	F:RNA binding; P:rRNA processing; P:tRNA export from nucleus; C:small-subunit processome; C:CURI complex; C:UTP-C complex			G3DSA:1.10.1410.10 (GENE3D); G3DSA:3.30.460.10 (GENE3D); IPR035082 (PFAM); IPR035367 (PFAM); IPR005554 (PANTHER)	no GO terms	no GO terms
HSK10434_c0_g1_i1	Mitochodrial transcription termination factor-related	2821	20	0	76.19	2	F:GO:0003690; P:GO:0006355	F:double-stranded DNA binding; P:regulation of transcription, DNA-templated			IPR003690 (PFAM); IPR038538 (G3DSA:1.25.70.GENE3D); PTHR13068 (PANTHER); PTHR13068:SF31 (PANTHER)	F:GO:0003690; P:GO:0006355	F:double-stranded DNA binding; P:regulation of transcription, DNA-templated
HSK10435_c0_g1_i1	putative UDP-glucose flavonoid 3-O-glucosyltransferase 3	750	20	0	85.89	2	P:GO:0008152; F:GO:0016758	P:metabolic process; F:transferase activity, transferring hexosyl groups			G3DSA:3.40.50.2000 (GENE3D); IPR002213 (PFAM); PTHR11926 (PANTHER); PTHR11926:SF753 (PANTHER); SSF53756 (SUPERFAMILY)	P:GO:0008152; F:GO:0016758	P:metabolic process; F:transferase activity, transferring hexosyl groups
HSK10436_c0_g1_i1	---NA---	373									no IPS match	no IPS match	no IPS match
HSK10437_c0_g1_i1	peptidyl-prolyl cis-trans isomerase E	811	20	2.66344e-91	96.09	3	P:GO:0000413; F:GO:0003723; F:GO:0003755	P:protein peptidyl-prolyl isomerization; F:RNA binding; F:peptidyl-prolyl cis-trans isomerase activity	EC:5.2.1.8	Peptidylprolyl isomerase	IPR012677 (G3DSA:3.30.70.GENE3D); IPR000504 (PFAM); mobidb-lite (MOBIDB_LITE); PTHR11071:SF319 (PANTHER); IPR024936 (PANTHER); IPR024936 (PANTHER); PTHR11071:SF319 (PANTHER); IPR000504 (PROSITE_PROFILES); IPR034168 (CDD); IPR035979 (SUPERFAMILY)	F:GO:0003676; F:GO:0003723; F:GO:0003755	F:nucleic acid binding; F:RNA binding; F:peptidyl-prolyl cis-trans isomerase activity
HSK10438_c0_g1_i1	pentatricopeptide repeat-containing protein At5g15280	427	20	5.37229e-92	85.23	1	F:GO:0005515	F:protein binding			IPR002885 (PFAM); IPR002885 (TIGRFAM); IPR011990 (G3DSA:1.25.40.GENE3D); IPR002885 (PFAM); PTHR24015:SF787 (PANTHER); PTHR24015 (PANTHER); IPR002885 (PROSITE_PROFILES); IPR002885 (PROSITE_PROFILES); IPR002885 (PROSITE_PROFILES)	F:GO:0005515	F:protein binding
HSK10439_c0_g1_i1	BSD domain-containing family protein	819	20	6.48028e-115	75.14						IPR035925 (G3DSA:1.10.3970.GENE3D); IPR005607 (PFAM); mobidb-lite (MOBIDB_LITE); PTHR31923:SF3 (PANTHER); PTHR31923 (PANTHER); IPR005607 (PROSITE_PROFILES); SSF140383 (SUPERFAMILY)	no GO terms	no GO terms
HSK10439_c0_g1_i2	BSD domain-containing family protein	990	20	5.42066e-114	75.14						IPR035925 (G3DSA:1.10.3970.GENE3D); IPR005607 (PFAM); mobidb-lite (MOBIDB_LITE); PTHR31923:SF3 (PANTHER); PTHR31923 (PANTHER); IPR005607 (PROSITE_PROFILES); SSF140383 (SUPERFAMILY)	no GO terms	no GO terms
HSK1044_c0_g1_i1	homeobox-leucine zipper protein ATHB-8	222	20	2.36121e-46	97.79	3	F:GO:0003677; C:GO:0005634; F:GO:0008289	F:DNA binding; C:nucleus; F:lipid binding			IPR013978 (PFAM)	no GO terms	no GO terms
HSK10440_c0_g1_i1	protein IQ-DOMAIN 14	296	20	7.42453e-52	79.19						mobidb-lite (MOBIDB_LITE); PTHR32295:SF13 (PANTHER); PTHR32295 (PANTHER)	no GO terms	no GO terms
HSK10440_c0_g2_i1	protein IQ-DOMAIN 14	1297	20	0	83.72	2	F:GO:0005515; P:GO:0009739	F:protein binding; P:response to gibberellin			IPR025064 (PFAM); mobidb-lite (MOBIDB_LITE); mobidb-lite (MOBIDB_LITE); mobidb-lite (MOBIDB_LITE); mobidb-lite (MOBIDB_LITE); PTHR32295:SF13 (PANTHER); PTHR32295 (PANTHER); IPR000048 (PROSITE_PROFILES)	F:GO:0005515	F:protein binding
HSK10441_c0_g1_i1	NADH dehydrogenase [ubiquinone] iron-sulfur protein 6, mitochondrial	762	20	4.54538e-69	92.29	1	C:GO:0005739	C:mitochondrion			IPR019401 (PFAM); G3DSA:2.60.260.40 (GENE3D); PTHR13156 (PANTHER)	no GO terms	no GO terms
HSK10442_c0_g1_i1	ribosomal protein L11 methyltransferase-like isoform X3	270	20	2.42338e-31	94.05	2	P:GO:0006479; F:GO:0008276	P:protein methylation; F:protein methyltransferase activity			no IPS match	no IPS match	no IPS match
HSK10442_c0_g1_i2	ribosomal protein L11 methyltransferase-like isoform X3	426	20	1.65144e-90	93.72	2	P:GO:0006479; F:GO:0008276	P:protein methylation; F:protein methyltransferase activity			G3DSA:3.40.50.150 (GENE3D); PF06325 (PFAM); PTHR43648 (PANTHER); cd02440 (CDD); IPR029063 (SUPERFAMILY)	no GO terms	no GO terms
HSK10442_c0_g2_i1	ribosomal protein L11 methyltransferase	469	20	6.38504e-81	91.03	2	P:GO:0006479; F:GO:0008276	P:protein methylation; F:protein methyltransferase activity			PF06325 (PFAM); G3DSA:3.40.50.150 (GENE3D); PTHR43648 (PANTHER); IPR029063 (SUPERFAMILY)	no GO terms	no GO terms
HSK10443_c0_g1_i1	Six-bladed beta-propeller, TolB-like protein	1168	20	0	84.01	4	C:GO:0005774; C:GO:0005783; C:GO:0005886; C:GO:0016021	C:vacuolar membrane; C:endoplasmic reticulum; C:plasma membrane; C:integral component of membrane			IPR011042 (G3DSA:2.120.10.GENE3D); PTHR31460:SF4 (PANTHER); PTHR31460 (PANTHER); SSF101898 (SUPERFAMILY)	no GO terms	no GO terms
HSK10444_c0_g1_i1	2-carboxy-1,4-naphthoquinone phytyltransferase, chloroplastic isoform X1	806	20	1.69099e-178	92.41	6	F:GO:0004659; C:GO:0009507; P:GO:0009772; P:GO:0010236; C:GO:0016021; P:GO:0042372	F:prenyltransferase activity; C:chloroplast; P:photosynthetic electron transport in photosystem II; P:plastoquinone biosynthetic process; C:integral component of membrane; P:phylloquinone biosynthetic process			IPR026046 (PIRSF); IPR000537 (PFAM); IPR011937 (TIGRFAM); PTHR13929:SF3 (PANTHER); PTHR13929 (PANTHER); cd13962 (CDD)	F:GO:0004659; C:GO:0016021; F:GO:0016765; P:GO:0042372	F:prenyltransferase activity; C:integral component of membrane; F:transferase activity, transferring alkyl or aryl (other than methyl) groups; P:phylloquinone biosynthetic process
HSK10445_c0_g1_i1	PREDICTED: uncharacterized protein LOC102622006	1488	20	0	86						PTHR31431 (PANTHER)	no GO terms	no GO terms
HSK10445_c0_g2_i1	hypothetical protein CUMW_254220	238	20	3.27807e-19	93.67						no IPS match	no IPS match	no IPS match
HSK10446_c0_g1_i1	chaperone protein DnaJ-like	647	20	4.59456e-90	84.96						PTHR15852 (PANTHER); PTHR15852:SF26 (PANTHER); IPR036410 (SUPERFAMILY)	no GO terms	no GO terms
HSK10447_c0_g1_i1	probable 3-beta-hydroxysteroid-Delta(8),Delta(7)-isomerase	649	20	3.12666e-147	81.33	4	P:GO:0006694; C:GO:0016021; P:GO:0016125; F:GO:0047750	P:steroid biosynthetic process; C:integral component of membrane; P:sterol metabolic process; F:cholestenol delta-isomerase activity	EC:5.3.3.5	Cholestenol Delta-isomerase	IPR007905 (PFAM); IPR007905 (PANTHER); PTHR14207:SF0 (PANTHER); IPR033118 (PROSITE_PROFILES)	C:GO:0016021; P:GO:0016125; F:GO:0047750	C:integral component of membrane; P:sterol metabolic process; F:cholestenol delta-isomerase activity
HSK10447_c0_g1_i2	probable 3-beta-hydroxysteroid-Delta(8),Delta(7)-isomerase	681	20	5.29288e-146	81.25	4	P:GO:0006694; C:GO:0016021; P:GO:0016125; F:GO:0047750	P:steroid biosynthetic process; C:integral component of membrane; P:sterol metabolic process; F:cholestenol delta-isomerase activity	EC:5.3.3.5	Cholestenol Delta-isomerase	IPR007905 (PFAM); PTHR14207:SF0 (PANTHER); IPR007905 (PANTHER); IPR033118 (PROSITE_PROFILES)	C:GO:0016021; P:GO:0016125; F:GO:0047750	C:integral component of membrane; P:sterol metabolic process; F:cholestenol delta-isomerase activity
HSK10447_c0_g1_i3	probable 3-beta-hydroxysteroid-Delta(8),Delta(7)-isomerase	958	20	7.48903e-152	81.79	4	P:GO:0006694; C:GO:0016021; P:GO:0016125; F:GO:0047750	P:steroid biosynthetic process; C:integral component of membrane; P:sterol metabolic process; F:cholestenol delta-isomerase activity	EC:5.3.3.5	Cholestenol Delta-isomerase	IPR007905 (PFAM); mobidb-lite (MOBIDB_LITE); IPR007905 (PANTHER); PTHR14207:SF0 (PANTHER); IPR033118 (PROSITE_PROFILES)	C:GO:0016021; P:GO:0016125; F:GO:0047750	C:integral component of membrane; P:sterol metabolic process; F:cholestenol delta-isomerase activity
HSK10447_c0_g1_i4	probable 3-beta-hydroxysteroid-Delta(8),Delta(7)-isomerase	990	20	4.16342e-154	81.44	4	P:GO:0006694; C:GO:0016021; P:GO:0016125; F:GO:0047750	P:steroid biosynthetic process; C:integral component of membrane; P:sterol metabolic process; F:cholestenol delta-isomerase activity	EC:5.3.3.5	Cholestenol Delta-isomerase	IPR007905 (PFAM); mobidb-lite (MOBIDB_LITE); IPR007905 (PANTHER); PTHR14207:SF0 (PANTHER); IPR033118 (PROSITE_PROFILES)	C:GO:0016021; P:GO:0016125; F:GO:0047750	C:integral component of membrane; P:sterol metabolic process; F:cholestenol delta-isomerase activity
HSK10448_c0_g1_i1	Senescence regulator	926	20	7.06828e-102	70.33						IPR007608 (PFAM); mobidb-lite (MOBIDB_LITE); PTHR33083 (PANTHER); PTHR33083:SF9 (PANTHER)	no GO terms	no GO terms
HSK10448_c0_g1_i2	Senescence regulator	938	20	3.31024e-101	68.46						IPR007608 (PFAM); mobidb-lite (MOBIDB_LITE); PTHR33083 (PANTHER); PTHR33083:SF9 (PANTHER)	no GO terms	no GO terms
HSK10449_c0_g1_i1	---NA---	603									no IPS match	no IPS match	no IPS match
HSK1045_c0_g1_i1	---NA---	664									no IPS match	no IPS match	no IPS match
HSK10450_c0_g1_i1	putative methyltransferase NSUN6 isoform X1	1495	20	0	92.04	3	F:GO:0003723; F:GO:0008168; P:GO:0032259	F:RNA binding; F:methyltransferase activity; P:methylation			IPR023267 (PRINTS); G3DSA:3.40.50.150 (GENE3D); G3DSA:3.40.50.150 (GENE3D); IPR001678 (PFAM); mobidb-lite (MOBIDB_LITE); PTHR22807 (PANTHER); PTHR22807:SF34 (PANTHER); IPR001678 (PROSITE_PROFILES); cd02440 (CDD); IPR029063 (SUPERFAMILY)	F:GO:0008168	F:methyltransferase activity
HSK10450_c0_g2_i1	putative methyltransferase NSUN6 isoform X1	512	20	3.40373e-116	86.69	3	F:GO:0003723; F:GO:0008168; P:GO:0032259	F:RNA binding; F:methyltransferase activity; P:methylation			PTHR22807:SF34 (PANTHER); PTHR22807 (PANTHER)	no GO terms	no GO terms
HSK10451_c0_g1_i1	60S ribosomal protein L7a-1	1159	20	2.26614e-144	99.05	4	P:GO:0000470; F:GO:0003723; P:GO:0006412; C:GO:0022625	P:maturation of LSU-rRNA; F:RNA binding; P:translation; C:cytosolic large ribosomal subunit			IPR018492 (PRINTS); IPR001921 (PRINTS); IPR004038 (PFAM); IPR038524 (G3DSA:3.30.1330.GENE3D); PTHR23105 (PANTHER); PTHR23105:SF70 (PANTHER); IPR029064 (SUPERFAMILY)	no GO terms	no GO terms
HSK10452_c0_g1_i1	probable anion transporter 5	1793	20	0	95.29	2	C:GO:0016021; P:GO:0055085	C:integral component of membrane; P:transmembrane transport			IPR011701 (PFAM); G3DSA:1.20.1250.20 (GENE3D); G3DSA:1.20.1250.20 (GENE3D); PTHR11662:SF282 (PANTHER); PTHR11662 (PANTHER); IPR020846 (PROSITE_PROFILES); IPR020846 (CDD); IPR036259 (SUPERFAMILY)	C:GO:0016021; P:GO:0055085	C:integral component of membrane; P:transmembrane transport
HSK10452_c0_g2_i1	probable anion transporter 5	554	20	4.89291e-34	94.02	5	F:GO:0005315; P:GO:0006817; C:GO:0009536; C:GO:0016021; P:GO:0098656	F:inorganic phosphate transmembrane transporter activity; P:phosphate ion transport; C:plastid; C:integral component of membrane; P:anion transmembrane transport			PTHR11662 (PANTHER); PTHR11662:SF282 (PANTHER)	no GO terms	no GO terms
HSK10453_c0_g1_i1	cytochrome b-c1 complex subunit Rieske-4, mitochondrial-like	1259	20	4.53584e-167	95.09	9	C:GO:0005743; P:GO:0006118; P:GO:0006119; F:GO:0008121; C:GO:0016021; P:GO:0022900; C:GO:0045275; F:GO:0051537; P:GO:1902600	C:mitochondrial inner membrane; P:obsolete electron transport; P:oxidative phosphorylation; F:ubiquinol-cytochrome-c reductase activity; C:integral component of membrane; P:electron transport chain; C:respiratory chain complex III; F:2 iron, 2 sulfur cluster binding; P:proton transmembrane transport	EC:1.10.2; EC:1.10.2.2	Acting on diphenols and related substances as donors; Quinol--cytochrome-c reductase	IPR005805 (PRINTS); IPR004192 (PFAM); IPR006317 (TIGRFAM); IPR017941 (PFAM); IPR036922 (G3DSA:2.102.10.GENE3D); PTHR10134:SF17 (PANTHER); IPR014349 (PANTHER); IPR017941 (PROSITE_PROFILES); cd03470 (CDD); SSF81502 (SUPERFAMILY); IPR036922 (SUPERFAMILY)	F:GO:0008121; C:GO:0016020; F:GO:0016491; F:GO:0016679; F:GO:0051537; P:GO:0055114	F:ubiquinol-cytochrome-c reductase activity; C:membrane; F:oxidoreductase activity; F:oxidoreductase activity, acting on diphenols and related substances as donors; F:2 iron, 2 sulfur cluster binding; P:oxidation-reduction process
HSK10454_c0_g1_i1	putative lipase YDR444W	1438	20	0	88.29	2	P:GO:0044255; F:GO:0052689	P:cellular lipid metabolic process; F:carboxylic ester hydrolase activity	EC:3.1.1.1	Carboxylesterase	IPR007751 (PFAM); PTHR12482:SF11 (PANTHER); PTHR12482 (PANTHER); IPR029058 (SUPERFAMILY)	no GO terms	no GO terms
HSK10455_c0_g1_i1	Six-bladed beta-propeller, TolB-like protein	1348	20	0	84.26	4	C:GO:0005774; C:GO:0005783; C:GO:0005886; C:GO:0016021	C:vacuolar membrane; C:endoplasmic reticulum; C:plasma membrane; C:integral component of membrane			IPR011042 (G3DSA:2.120.10.GENE3D); PTHR31460 (PANTHER); PTHR31460:SF4 (PANTHER); SSF101898 (SUPERFAMILY)	no GO terms	no GO terms
HSK10456_c0_g1_i1	---NA---	448									no IPS match	no IPS match	no IPS match
HSK10456_c1_g1_i1	serine carboxypeptidase-like 25	920	20	1.75613e-178	93.93	5	F:GO:0004185; C:GO:0005615; C:GO:0005773; P:GO:0009742; P:GO:0051603	F:serine-type carboxypeptidase activity; C:extracellular space; C:vacuole; P:brassinosteroid mediated signaling pathway; P:proteolysis involved in cellular protein catabolic process	EC:3.4.21; EC:3.4.16	Acting on peptide bonds (peptidases); Acting on peptide bonds (peptidases)	IPR001563 (PRINTS); IPR029058 (G3DSA:3.40.50.GENE3D); IPR001563 (PFAM); IPR001563 (PANTHER); PTHR11802:SF43 (PANTHER); IPR029058 (SUPERFAMILY)	F:GO:0004185; P:GO:0006508	F:serine-type carboxypeptidase activity; P:proteolysis
HSK10457_c0_g1_i1	5'-adenylylsulfate reductase 3, chloroplastic	1736	20	0	93.91	4	C:GO:0005623; F:GO:0016671; P:GO:0019419; P:GO:0045454	C:cell; F:oxidoreductase activity, acting on a sulfur group of donors, disulfide as acceptor; P:sulfate reduction; P:cell redox homeostasis			IPR014729 (G3DSA:3.40.50.GENE3D); IPR002500 (PFAM); IPR013766 (PFAM); IPR004508 (TIGRFAM); G3DSA:3.40.30.10 (GENE3D); PTHR23293:SF13 (PANTHER); PTHR23293 (PANTHER); IPR013766 (PROSITE_PROFILES); IPR002500 (CDD); cd02993 (CDD); IPR036249 (SUPERFAMILY); SSF52402 (SUPERFAMILY)	F:GO:0003824; P:GO:0008152; F:GO:0016671; P:GO:0019419; P:GO:0045454; P:GO:0055114	F:catalytic activity; P:metabolic process; F:oxidoreductase activity, acting on a sulfur group of donors, disulfide as acceptor; P:sulfate reduction; P:cell redox homeostasis; P:oxidation-reduction process
HSK10457_c0_g1_i2	5'-adenylylsulfate reductase 1, chloroplastic-like	771	20	3.67203e-57	89.96	5	F:GO:0004604; C:GO:0005623; P:GO:0019344; P:GO:0019379; P:GO:0045454	F:phosphoadenylyl-sulfate reductase (thioredoxin) activity; C:cell; P:cysteine biosynthetic process; P:sulfate assimilation, phosphoadenylyl sulfate reduction by phosphoadenylyl-sulfate reductase (thioredoxin); P:cell redox homeostasis	EC:1.8.4.8	Phosphoadenylyl-sulfate reductase (thioredoxin)	mobidb-lite (MOBIDB_LITE); PTHR23293:SF13 (PANTHER); PTHR23293 (PANTHER)	no GO terms	no GO terms
HSK10457_c0_g2_i1	---NA---	571									no IPS match	no IPS match	no IPS match
HSK10458_c0_g1_i1	trans-cinnamate 4-monooxygenase	1802	20	0	98.02	9	F:GO:0005506; P:GO:0006558; P:GO:0009805; P:GO:0009809; P:GO:0009811; C:GO:0016021; F:GO:0016710; F:GO:0020037; P:GO:0055114	F:iron ion binding; P:L-phenylalanine metabolic process; P:coumarin biosynthetic process; P:lignin biosynthetic process; P:stilbene biosynthetic process; C:integral component of membrane; F:trans-cinnamate 4-monooxygenase activity; F:heme binding; P:oxidation-reduction process	EC:1.14.13; EC:1.14.13.11	Acting on paired donors, with incorporation or reduction of molecular oxygen. The oxygen incorporated need not be derived from O(2); Trans-cinnamate 4-monooxygenase	IPR002401 (PRINTS); IPR001128 (PRINTS); IPR001128 (PFAM); IPR036396 (G3DSA:1.10.630.GENE3D); PTHR24298:SF56 (PANTHER); PTHR24298 (PANTHER); IPR036396 (SUPERFAMILY)	F:GO:0005506; F:GO:0016705; F:GO:0020037; P:GO:0055114	F:iron ion binding; F:oxidoreductase activity, acting on paired donors, with incorporation or reduction of molecular oxygen; F:heme binding; P:oxidation-reduction process
HSK10458_c0_g1_i2	trans-cinnamate 4-hydroxylase	1179	20	0	97.59	9	F:GO:0005506; P:GO:0006558; P:GO:0009805; P:GO:0009809; P:GO:0009811; C:GO:0016021; F:GO:0016710; F:GO:0020037; P:GO:0055114	F:iron ion binding; P:L-phenylalanine metabolic process; P:coumarin biosynthetic process; P:lignin biosynthetic process; P:stilbene biosynthetic process; C:integral component of membrane; F:trans-cinnamate 4-monooxygenase activity; F:heme binding; P:oxidation-reduction process	EC:1.14.13; EC:1.14.13.11	Acting on paired donors, with incorporation or reduction of molecular oxygen. The oxygen incorporated need not be derived from O(2); Trans-cinnamate 4-monooxygenase	IPR002401 (PRINTS); IPR036396 (G3DSA:1.10.630.GENE3D); IPR001128 (PFAM); PTHR24298:SF56 (PANTHER); PTHR24298 (PANTHER); IPR036396 (SUPERFAMILY)	F:GO:0005506; F:GO:0016705; F:GO:0020037; P:GO:0055114	F:iron ion binding; F:oxidoreductase activity, acting on paired donors, with incorporation or reduction of molecular oxygen; F:heme binding; P:oxidation-reduction process
HSK10459_c0_g1_i1	acyltransferase-like protein At3g26840, chloroplastic	788	20	6.49434e-85	76.54	1	F:GO:0016747	F:transferase activity, transferring acyl groups other than amino-acyl groups			mobidb-lite (MOBIDB_LITE)	no GO terms	no GO terms
HSK1046_c0_g1_i1	rhodanese-like domain-containing protein 4A, chloroplastic	1130	20	0	79.59	2	C:GO:0009507; C:GO:0016021	C:chloroplast; C:integral component of membrane			IPR036873 (G3DSA:3.40.250.GENE3D); mobidb-lite (MOBIDB_LITE); PTHR11177:SF260 (PANTHER); PTHR11177 (PANTHER); IPR036873 (SUPERFAMILY)	no GO terms	no GO terms
HSK1046_c0_g1_i2	rhodanese-like domain-containing protein 4A, chloroplastic	1134	20	0	79.59	2	C:GO:0009507; C:GO:0016021	C:chloroplast; C:integral component of membrane			IPR036873 (G3DSA:3.40.250.GENE3D); mobidb-lite (MOBIDB_LITE); PTHR11177:SF260 (PANTHER); PTHR11177 (PANTHER); IPR036873 (SUPERFAMILY)	no GO terms	no GO terms
HSK10460_c0_g1_i1	thioredoxin H2-like	639	20	3.39995e-92	78.25	6	C:GO:0005623; P:GO:0006118; P:GO:0006662; F:GO:0015035; P:GO:0045454; P:GO:0055114	C:cell; P:obsolete electron transport; P:glycerol ether metabolic process; F:protein disulfide oxidoreductase activity; P:cell redox homeostasis; P:oxidation-reduction process			G3DSA:3.40.30.10 (GENE3D); IPR005746 (PIRSF); IPR013766 (PFAM); PTHR10438:SF278 (PANTHER); IPR005746 (PANTHER); IPR013766 (PROSITE_PROFILES); cd02947 (CDD); IPR036249 (SUPERFAMILY)	P:GO:0006662; F:GO:0015035; P:GO:0045454	P:glycerol ether metabolic process; F:protein disulfide oxidoreductase activity; P:cell redox homeostasis
HSK10461_c0_g1_i1	hypothetical protein CUMW_074110	1064	20	1.97997e-175	75.92						mobidb-lite (MOBIDB_LITE); PTHR34356 (PANTHER); PTHR34356:SF1 (PANTHER)	no GO terms	no GO terms
HSK10462_c0_g1_i1	Zinc finger, LSD1-type	660	20	1.49259e-165	77.42						PF00656 (PFAM); G3DSA:3.40.50.12660 (GENE3D); PTHR31773 (PANTHER); PTHR31773:SF5 (PANTHER); IPR029030 (SUPERFAMILY)	no GO terms	no GO terms
HSK10462_c0_g1_i2	metacaspase-3-like isoform X2	703	20	2.76813e-102	68.91						G3DSA:3.40.50.12660 (GENE3D); PF00656 (PFAM); PTHR31773 (PANTHER); PTHR31773:SF5 (PANTHER)	no GO terms	no GO terms
HSK10463_c0_g1_i1	hypothetical protein CUMW_086180	485	20	1.01726e-113	92.42	5	C:GO:0005737; P:GO:0006629; C:GO:0016021; F:GO:0016627; P:GO:0055114	C:cytoplasm; P:lipid metabolic process; C:integral component of membrane; F:oxidoreductase activity, acting on the CH-CH group of donors; P:oxidation-reduction process			G3DSA:1.20.120.1630 (GENE3D); IPR010721 (PFAM); IPR010721 (PANTHER); PTHR32251:SF14 (PANTHER); IPR001104 (PROSITE_PROFILES)	C:GO:0005737; P:GO:0006629; C:GO:0016021; F:GO:0016627	C:cytoplasm; P:lipid metabolic process; C:integral component of membrane; F:oxidoreductase activity, acting on the CH-CH group of donors
HSK10464_c0_g1_i1	proline iminopeptidase	1619	20	0	93.06	4	F:GO:0004177; C:GO:0005829; P:GO:0006508; C:GO:0009507	F:aminopeptidase activity; C:cytosol; P:proteolysis; C:chloroplast	EC:3.4.11	Acting on peptide bonds (peptidases)	IPR000073 (PRINTS); IPR002410 (PRINTS); IPR000073 (PFAM); IPR029058 (G3DSA:3.40.50.GENE3D); IPR005944 (TIGRFAM); IPR005944 (PIRSF); IPR005944 (PANTHER); IPR029058 (SUPERFAMILY)	F:GO:0004177; C:GO:0005737; P:GO:0006508; F:GO:0008233	F:aminopeptidase activity; C:cytoplasm; P:proteolysis; F:peptidase activity
HSK10464_c0_g1_i2	proline iminopeptidase	1577	20	0	90.26	4	F:GO:0004177; C:GO:0005829; P:GO:0006508; C:GO:0009507	F:aminopeptidase activity; C:cytosol; P:proteolysis; C:chloroplast	EC:3.4.11	Acting on peptide bonds (peptidases)	IPR000073 (PRINTS); IPR002410 (PRINTS); IPR029058 (G3DSA:3.40.50.GENE3D); IPR005944 (PIRSF); IPR005944 (TIGRFAM); IPR000073 (PFAM); IPR005944 (PANTHER); IPR029058 (SUPERFAMILY)	F:GO:0004177; C:GO:0005737; P:GO:0006508; F:GO:0008233	F:aminopeptidase activity; C:cytoplasm; P:proteolysis; F:peptidase activity
HSK10464_c0_g2_i1	---NA---	221									no IPS match	no IPS match	no IPS match
HSK10465_c0_g1_i1	SET and MYND domain-containing protein 4-like	630	20	1.05749e-56	85.86	3	F:GO:0005515; F:GO:0008168; P:GO:0032259	F:protein binding; F:methyltransferase activity; P:methylation			PF13374 (PFAM); IPR011990 (G3DSA:1.25.40.GENE3D); PTHR12197:SF242 (PANTHER); PTHR12197 (PANTHER)	F:GO:0005515	F:protein binding
HSK10465_c0_g1_i2	SET and MYND domain-containing protein 4-like	332	20	3.43752e-45	86.36	3	F:GO:0005515; F:GO:0008168; P:GO:0032259	F:protein binding; F:methyltransferase activity; P:methylation			IPR011990 (G3DSA:1.25.40.GENE3D)	F:GO:0005515	F:protein binding
HSK10465_c0_g1_i3	SET and MYND domain-containing protein 4-like	1064	20	0	78.38	1	F:GO:0016740	F:transferase activity			PTHR12197:SF242 (PANTHER); PTHR12197 (PANTHER)	no GO terms	no GO terms
HSK10465_c0_g1_i4	SET and MYND domain-containing protein 4	979	20	5.64071e-124	77.45	1	F:GO:0005515	F:protein binding			IPR011990 (G3DSA:1.25.40.GENE3D); PTHR12197 (PANTHER); PTHR12197:SF242 (PANTHER)	F:GO:0005515	F:protein binding
HSK10466_c0_g1_i1	RING-H2 finger protein ATL65	634	20	1.15787e-55	84.25	1	C:GO:0016021	C:integral component of membrane			no IPS match	no IPS match	no IPS match
HSK10467_c0_g1_i1	predicted protein	462	20	8.89775e-36	85.19						mobidb-lite (MOBIDB_LITE); PTHR37207 (PANTHER)	no GO terms	no GO terms
HSK10468_c0_g1_i1	macrophage migration inhibitory factor homolog	256	20	1.63965e-19	92.38	1	C:GO:0005777	C:peroxisome			no IPS match	no IPS match	no IPS match
HSK10468_c0_g1_i2	macrophage migration inhibitory factor homolog	588	20	1.10578e-77	90.37						IPR014347 (G3DSA:3.30.429.GENE3D); IPR001398 (PFAM); PTHR11954:SF25 (PANTHER); IPR001398 (PANTHER); IPR001398 (PRODOM); IPR014347 (SUPERFAMILY)	no GO terms	no GO terms
HSK10468_c0_g1_i3	macrophage migration inhibitory factor homolog	610	20	1.77068e-75	89.15	1	C:GO:0005777	C:peroxisome			IPR001398 (PFAM); IPR014347 (G3DSA:3.30.429.GENE3D); IPR001398 (PANTHER); PTHR11954:SF25 (PANTHER); IPR001398 (PRODOM); IPR014347 (SUPERFAMILY)	no GO terms	no GO terms
HSK10469_c0_g1_i1	dehydration responsive protein	305	6	1.43659e-15	66.5	4	F:GO:0003735; C:GO:0005840; P:GO:0006412; C:GO:0016021	F:structural constituent of ribosome; C:ribosome; P:translation; C:integral component of membrane			no IPS match	no IPS match	no IPS match
HSK1047_c0_g1_i1	zinc finger protein JACKDAW-like	676	20	9.42915e-62	69.38	2	F:GO:0003676; F:GO:0046872	F:nucleic acid binding; F:metal ion binding			mobidb-lite (MOBIDB_LITE); PTHR10593 (PANTHER); PTHR10593:SF99 (PANTHER)	no GO terms	no GO terms
HSK10470_c0_g1_i1	dirigent protein 22-like	877	20	7.23126e-123	86.42	2	C:GO:0016021; C:GO:0048046	C:integral component of membrane; C:apoplast			IPR004265 (PFAM); PTHR21495:SF128 (PANTHER); PTHR21495 (PANTHER)	no GO terms	no GO terms
HSK10471_c0_g1_i1	HVA22-like protein f	743	20	1.67847e-112	90.27	1	C:GO:0016021	C:integral component of membrane			IPR004345 (PFAM); IPR004345 (PANTHER); PTHR12300:SF52 (PANTHER)	no GO terms	no GO terms
HSK10472_c0_g1_i1	VQ motif-containing protein 11-like	300	20	1.08511e-41	72.57						mobidb-lite (MOBIDB_LITE)	no GO terms	no GO terms
HSK10472_c0_g2_i1	VQ motif-containing protein 11-like	823	20	5.02972e-85	66.19	2	C:GO:0016020; C:GO:0016021	C:membrane; C:integral component of membrane			IPR008889 (PFAM); mobidb-lite (MOBIDB_LITE); PTHR33402 (PANTHER); PTHR33402:SF3 (PANTHER)	no GO terms	no GO terms
HSK10473_c0_g1_i1	receptor-like serine/threonine-protein kinase SD1-8	318	20	1.20406e-59	81.11	8	F:GO:0004674; F:GO:0005524; C:GO:0005886; P:GO:0006468; P:GO:0009069; C:GO:0016021; F:GO:0031625; P:GO:0048544	F:protein serine/threonine kinase activity; F:ATP binding; C:plasma membrane; P:protein phosphorylation; P:serine family amino acid metabolic process; C:integral component of membrane; F:ubiquitin protein ligase binding; P:recognition of pollen	EC:2.7.11	Transferring phosphorus-containing groups	PTHR44011 (PANTHER); PTHR44011:SF1 (PANTHER); IPR001480 (PROSITE_PROFILES); IPR036426 (SUPERFAMILY)	no GO terms	no GO terms
HSK10473_c0_g2_i1	ARK3	287	20	9.4085e-54	88.26	8	F:GO:0004674; F:GO:0005524; C:GO:0005886; P:GO:0006468; P:GO:0009069; C:GO:0016021; F:GO:0031625; P:GO:0048544	F:protein serine/threonine kinase activity; F:ATP binding; C:plasma membrane; P:protein phosphorylation; P:serine family amino acid metabolic process; C:integral component of membrane; F:ubiquitin protein ligase binding; P:recognition of pollen	EC:2.7.11	Transferring phosphorus-containing groups	IPR003609 (PFAM); PTHR27002 (PANTHER); PTHR27002:SF93 (PANTHER); IPR003609 (PROSITE_PROFILES); cd01098 (CDD)	no GO terms	no GO terms
HSK10473_c0_g2_i2	receptor-like serine/threonine-protein kinase SD1-8	637	20	4.76254e-147	84.97	9	F:GO:0004674; F:GO:0004715; F:GO:0005524; C:GO:0005886; P:GO:0009069; C:GO:0016021; P:GO:0018108; F:GO:0031625; P:GO:0048544	F:protein serine/threonine kinase activity; F:non-membrane spanning protein tyrosine kinase activity; F:ATP binding; C:plasma membrane; P:serine family amino acid metabolic process; C:integral component of membrane; P:peptidyl-tyrosine phosphorylation; F:ubiquitin protein ligase binding; P:recognition of pollen	EC:2.7.10; EC:2.7.11; EC:2.7.10.2	Transferring phosphorus-containing groups; Transferring phosphorus-containing groups; Non-specific protein-tyrosine kinase	IPR003609 (PFAM); G3DSA:3.30.200.20 (GENE3D); IPR022126 (PFAM); PTHR27002:SF93 (PANTHER); PTHR27002 (PANTHER); IPR003609 (PROSITE_PROFILES); IPR000719 (PROSITE_PROFILES); cd01098 (CDD); IPR011009 (SUPERFAMILY)	F:GO:0004672; F:GO:0004674; F:GO:0005524; P:GO:0006468	F:protein kinase activity; F:protein serine/threonine kinase activity; F:ATP binding; P:protein phosphorylation
HSK10473_c0_g3_i1	receptor-like serine/threonine-protein kinase SD1-8	731	20	0	84.13	9	F:GO:0004674; F:GO:0004715; F:GO:0005524; C:GO:0005886; P:GO:0009069; C:GO:0016021; P:GO:0018108; F:GO:0031625; P:GO:0048544	F:protein serine/threonine kinase activity; F:non-membrane spanning protein tyrosine kinase activity; F:ATP binding; C:plasma membrane; P:serine family amino acid metabolic process; C:integral component of membrane; P:peptidyl-tyrosine phosphorylation; F:ubiquitin protein ligase binding; P:recognition of pollen	EC:2.7.10; EC:2.7.11; EC:2.7.10.2	Transferring phosphorus-containing groups; Transferring phosphorus-containing groups; Non-specific protein-tyrosine kinase	IPR001480 (PFAM); IPR000858 (PFAM); PTHR27002 (PANTHER); PTHR27002:SF93 (PANTHER); IPR000742 (PROSITE_PROFILES); cd00054 (CDD); IPR036426 (SUPERFAMILY)	P:GO:0048544	P:recognition of pollen
HSK10474_c0_g1_i1	---NA---	627									no IPS match	no IPS match	no IPS match
HSK10475_c0_g1_i1	2-oxoglutarate-Fe(II) type oxidoreductase	1181	20	0	92.22	3	F:GO:0016491; F:GO:0046872; P:GO:0055114	F:oxidoreductase activity; F:metal ion binding; P:oxidation-reduction process			PR00682 (PRINTS); IPR026992 (PFAM); IPR005123 (PFAM); IPR027443 (G3DSA:2.60.120.GENE3D); PTHR10209 (PANTHER); PTHR10209:SF214 (PANTHER); IPR005123 (PROSITE_PROFILES); SSF51197 (SUPERFAMILY)	F:GO:0016491; P:GO:0055114	F:oxidoreductase activity; P:oxidation-reduction process
HSK10475_c0_g1_i2	probable iron/ascorbate oxidoreductase DDB_G0283291 isoform X1	368	20	3.26877e-23	88.14	3	F:GO:0016491; F:GO:0046872; P:GO:0055114	F:oxidoreductase activity; F:metal ion binding; P:oxidation-reduction process			IPR027443 (G3DSA:2.60.120.GENE3D); PTHR10209:SF214 (PANTHER); PTHR10209 (PANTHER); SSF51197 (SUPERFAMILY)	no GO terms	no GO terms
HSK10475_c0_g1_i3	probable iron/ascorbate oxidoreductase DDB_G0283291 isoform X2	948	20	0	93.46	3	F:GO:0016491; F:GO:0046872; P:GO:0055114	F:oxidoreductase activity; F:metal ion binding; P:oxidation-reduction process			PR00682 (PRINTS); IPR026992 (PFAM); IPR005123 (PFAM); IPR027443 (G3DSA:2.60.120.GENE3D); PTHR10209 (PANTHER); PTHR10209:SF214 (PANTHER); IPR005123 (PROSITE_PROFILES); SSF51197 (SUPERFAMILY)	F:GO:0016491; P:GO:0055114	F:oxidoreductase activity; P:oxidation-reduction process
HSK10475_c0_g1_i4	2-oxoglutarate-Fe(II) type oxidoreductase-like isoform X3	1054	20	2.49885e-103	89.9	4	F:GO:0045431; F:GO:0046872; P:GO:0051555; P:GO:0055114	F:flavonol synthase activity; F:metal ion binding; P:flavonol biosynthetic process; P:oxidation-reduction process	EC:1.14.11; EC:1.14.11.23	Acting on paired donors, with incorporation or reduction of molecular oxygen. The oxygen incorporated need not be derived from O(2); Flavonol synthase	IPR005123 (PFAM); IPR027443 (G3DSA:2.60.120.GENE3D); PTHR10209 (PANTHER); PTHR10209:SF214 (PANTHER); IPR005123 (PROSITE_PROFILES); SSF51197 (SUPERFAMILY)	F:GO:0016491; P:GO:0055114	F:oxidoreductase activity; P:oxidation-reduction process
HSK10475_c0_g2_i1	hypothetical protein CUMW_075620	828	5	1.43033e-20	99.53	3	F:GO:0016491; F:GO:0046872; P:GO:0055114	F:oxidoreductase activity; F:metal ion binding; P:oxidation-reduction process			no IPS match	no IPS match	no IPS match
HSK10476_c0_g1_i1	INO80 complex subunit D-like	813	20	1.64214e-161	76.56	6	C:GO:0000123; P:GO:0042967; P:GO:0043967; F:GO:0043995; F:GO:0043996; F:GO:0046972	C:histone acetyltransferase complex; P:obsolete acyl-carrier-protein biosynthetic process; P:histone H4 acetylation; F:histone acetyltransferase activity (H4-K5 specific); F:histone acetyltransferase activity (H4-K8 specific); F:histone acetyltransferase activity (H4-K16 specific)	EC:2.3.1.48	Histone acetyltransferase	IPR025927 (PFAM); mobidb-lite (MOBIDB_LITE); PTHR13453:SF3 (PANTHER); IPR026316 (PANTHER)	C:GO:0000123	C:histone acetyltransferase complex
HSK10477_c0_g1_i1	chaperone protein dnaJ 20, chloroplastic-like	676	20	3.37473e-155	72.19						IPR001623 (PRINTS); IPR036869 (G3DSA:1.10.287.GENE3D); IPR001623 (PFAM); mobidb-lite (MOBIDB_LITE); PTHR45090 (PANTHER); IPR001623 (PROSITE_PROFILES); IPR001623 (CDD); IPR036869 (SUPERFAMILY)	no GO terms	no GO terms
HSK10478_c0_g1_i1	pentatricopeptide repeat-containing protein At4g33990	665	20	3.8829e-155	88.37	2	F:GO:0005515; F:GO:0008270	F:protein binding; F:zinc ion binding			IPR002885 (PFAM); IPR002885 (TIGRFAM); IPR011990 (G3DSA:1.25.40.GENE3D); IPR002885 (PFAM); PTHR24015:SF631 (PANTHER); PTHR24015:SF631 (PANTHER); PTHR24015 (PANTHER); IPR002885 (PROSITE_PROFILES); IPR002885 (PROSITE_PROFILES); IPR002885 (PROSITE_PROFILES); IPR002885 (PROSITE_PROFILES); IPR002885 (PROSITE_PROFILES)	F:GO:0005515	F:protein binding
HSK10479_c0_g1_i1	Lipid binding protein, putative	524	20	3.60805e-74	82.44						G3DSA:1.10.110.10 (GENE3D); IPR016140 (PFAM); PTHR33286:SF1 (PANTHER); PTHR33286 (PANTHER); cd04660 (CDD); IPR036312 (SUPERFAMILY)	no GO terms	no GO terms
HSK1048_c0_g1_i1	---NA---	201									no IPS match	no IPS match	no IPS match
HSK10480_c0_g1_i1	auxin-induced protein 15A-like	645	20	1.25156e-62	80.98	1	P:GO:0009733	P:response to auxin			IPR003676 (PFAM); PTHR31374 (PANTHER); PTHR31374:SF35 (PANTHER)	P:GO:0009733	P:response to auxin
HSK10481_c0_g1_i1	histone-lysine N-methyltransferase, H3 lysine-9 specific SUVH6-like	1094	13	1.2715e-118	64.15	9	C:GO:0005634; C:GO:0005694; F:GO:0008168; F:GO:0008270; P:GO:0016571; F:GO:0016740; F:GO:0018024; P:GO:0032259; P:GO:0034968	C:nucleus; C:chromosome; F:methyltransferase activity; F:zinc ion binding; P:histone methylation; F:transferase activity; F:histone-lysine N-methyltransferase activity; P:methylation; P:histone lysine methylation			mobidb-lite (MOBIDB_LITE)	no GO terms	no GO terms
HSK10481_c0_g2_i1	thylakoid lumenal protein TL20.3, chloroplastic	312	20	5.49934e-40	83.36						no IPS match	no IPS match	no IPS match
HSK10481_c0_g3_i1	thylakoid lumenal protein TL20.3, chloroplastic	752	20	1.77528e-83	96.62	4	F:GO:0005507; C:GO:0009535; F:GO:0016491; P:GO:0055114	F:copper ion binding; C:chloroplast thylakoid membrane; F:oxidoreductase activity; P:oxidation-reduction process			G3DSA:2.160.20.100 (GENE3D); IPR001646 (PFAM); PTHR14136 (PANTHER); PTHR14136:SF3 (PANTHER); SSF141571 (SUPERFAMILY)	no GO terms	no GO terms
HSK10481_c0_g3_i2	thylakoid lumenal protein TL20.3, chloroplastic	787	20	4.43584e-123	97.37	1	C:GO:0009535	C:chloroplast thylakoid membrane			G3DSA:2.160.20.100 (GENE3D); IPR001646 (PFAM); PTHR14136 (PANTHER); PTHR14136:SF3 (PANTHER); SSF141571 (SUPERFAMILY)	no GO terms	no GO terms
HSK10481_c0_g4_i1	---NA---	237									no IPS match	no IPS match	no IPS match
HSK10482_c0_g1_i1	Bromodomain domain-containing protein	1104	20	0	67.67	1	F:GO:0005515	F:protein binding			IPR001487 (PRINTS); IPR036427 (G3DSA:1.20.920.GENE3D); IPR001487 (PFAM); mobidb-lite (MOBIDB_LITE); mobidb-lite (MOBIDB_LITE); PTHR22880:SF147 (PANTHER); PTHR22880 (PANTHER); IPR001487 (PROSITE_PROFILES); IPR036427 (SUPERFAMILY)	F:GO:0005515	F:protein binding
HSK10483_c0_g1_i1	hypothetical protein CICLE_v10029272mg	1170	20	4.54657e-105	73.22	1	C:GO:0016021	C:integral component of membrane			PTHR35699 (PANTHER)	no GO terms	no GO terms
HSK10483_c0_g1_i2	hypothetical protein CICLE_v10029272mg	1074	20	1.50222e-105	80.36	2	C:GO:0009535; C:GO:0016021	C:chloroplast thylakoid membrane; C:integral component of membrane			PTHR35699 (PANTHER)	no GO terms	no GO terms
HSK10483_c0_g1_i3	hypothetical protein CICLE_v10029272mg	760	20	1.60871e-92	82.93	2	C:GO:0009535; C:GO:0016021	C:chloroplast thylakoid membrane; C:integral component of membrane			mobidb-lite (MOBIDB_LITE); PTHR35699 (PANTHER)	no GO terms	no GO terms
HSK10483_c0_g1_i4	PREDICTED: uncharacterized protein LOC102620299	919	20	2.77041e-132	86.18	2	C:GO:0009535; C:GO:0016021	C:chloroplast thylakoid membrane; C:integral component of membrane			PTHR35699 (PANTHER)	no GO terms	no GO terms
HSK10484_c0_g1_i1	general transcription factor 3C polypeptide 3 isoform X1	491	20	4.38941e-102	71.32	1	F:GO:0005515	F:protein binding			IPR011990 (G3DSA:1.25.40.GENE3D); PF13414 (PFAM); mobidb-lite (MOBIDB_LITE); PTHR23082 (PANTHER); IPR013026 (PROSITE_PROFILES); IPR011990 (SUPERFAMILY)	F:GO:0005515	F:protein binding
HSK10484_c1_g1_i1	general transcription factor 3C polypeptide 3 isoform X2	582	20	5.67281e-130	78.96	1	F:GO:0005515	F:protein binding			IPR011990 (G3DSA:1.25.40.GENE3D); IPR011990 (G3DSA:1.25.40.GENE3D); PF13428 (PFAM); PTHR23082 (PANTHER); IPR019734 (PROSITE_PROFILES); IPR019734 (PROSITE_PROFILES); IPR013026 (PROSITE_PROFILES); IPR011990 (SUPERFAMILY)	F:GO:0005515	F:protein binding
HSK10485_c0_g1_i1	---NA---	307									no IPS match	no IPS match	no IPS match
HSK10486_c0_g1_i1	probable phosphoinositide phosphatase SAC9 isoform X1	214	20	2.1686e-08	99.76	7	F:GO:0003735; C:GO:0005840; P:GO:0006412; F:GO:0008097; C:GO:0016021; P:GO:0042254; F:GO:0042578	F:structural constituent of ribosome; C:ribosome; P:translation; F:5S rRNA binding; C:integral component of membrane; P:ribosome biogenesis; F:phosphoric ester hydrolase activity			no IPS match	no IPS match	no IPS match
HSK10487_c0_g1_i1	---NA---	239									no IPS match	no IPS match	no IPS match
HSK10487_c0_g2_i1	---NA---	290									no IPS match	no IPS match	no IPS match
HSK10487_c0_g3_i1	---NA---	263									no IPS match	no IPS match	no IPS match
HSK10488_c0_g1_i1	---NA---	898									no IPS match	no IPS match	no IPS match
HSK10489_c0_g1_i1	MMS19 nucleotide excision repair protein homolog isoform X2	837	20	0	81.75						PTHR12891 (PANTHER)	no GO terms	no GO terms
HSK1049_c0_g1_i1	E3 ubiquitin-protein ligase Os04g0590900-like	359	20	2.95663e-83	81.98	4	C:GO:0016021; F:GO:0016874; P:GO:0043161; F:GO:0061630	C:integral component of membrane; F:ligase activity; P:proteasome-mediated ubiquitin-dependent protein catabolic process; F:ubiquitin protein ligase activity			mobidb-lite (MOBIDB_LITE); PTHR14155 (PANTHER); PTHR14155:SF101 (PANTHER)	no GO terms	no GO terms
HSK10490_c0_g1_i1	protein trichome birefringence-like 19	1493	20	0	91.73	5	C:GO:0005794; C:GO:0016021; F:GO:0016413; P:GO:0042967; P:GO:0071554	C:Golgi apparatus; C:integral component of membrane; F:O-acetyltransferase activity; P:obsolete acyl-carrier-protein biosynthetic process; P:cell wall organization or biogenesis			IPR026057 (PFAM); IPR025846 (PFAM); PTHR32285:SF48 (PANTHER); IPR029962 (PANTHER)	no GO terms	no GO terms
HSK10490_c0_g1_i2	protein trichome birefringence-like 19	222	20	7.30149e-27	84.52	5	C:GO:0005794; C:GO:0016021; F:GO:0016413; P:GO:0042967; P:GO:0071554	C:Golgi apparatus; C:integral component of membrane; F:O-acetyltransferase activity; P:obsolete acyl-carrier-protein biosynthetic process; P:cell wall organization or biogenesis			IPR029962 (PANTHER); PTHR32285:SF13 (PANTHER)	no GO terms	no GO terms
HSK10491_c0_g1_i1	probable serine/threonine-protein kinase GCN2	564	20	5.12483e-132	94.68	13	F:GO:0000049; F:GO:0004693; F:GO:0004694; F:GO:0005524; C:GO:0005737; P:GO:0006521; P:GO:0009069; P:GO:0009635; P:GO:0010998; C:GO:0016021; P:GO:0018105; P:GO:0051726; P:GO:0051726	F:tRNA binding; F:cyclin-dependent protein serine/threonine kinase activity; F:eukaryotic translation initiation factor 2alpha kinase activity; F:ATP binding; C:cytoplasm; P:regulation of cellular amino acid metabolic process; P:serine family amino acid metabolic process; P:response to herbicide; P:regulation of translational initiation by eIF2 alpha phosphorylation; C:integral component of membr…	EC:2.7.11; EC:2.7.11.22	Transferring phosphorus-containing groups; Cyclin-dependent kinase	PF13393 (PFAM); G3DSA:3.30.930.10 (GENE3D); PTHR11476:SF7 (PANTHER); IPR004516 (PANTHER); SSF55681 (SUPERFAMILY)	C:GO:0005737	C:cytoplasm
HSK10491_c0_g2_i1	probable serine/threonine-protein kinase GCN2	1232	20	0	90.55	8	F:GO:0000049; F:GO:0004694; F:GO:0005524; P:GO:0006521; P:GO:0009069; P:GO:0009635; P:GO:0010998; P:GO:0018105	F:tRNA binding; F:eukaryotic translation initiation factor 2alpha kinase activity; F:ATP binding; P:regulation of cellular amino acid metabolic process; P:serine family amino acid metabolic process; P:response to herbicide; P:regulation of translational initiation by eIF2 alpha phosphorylation; P:peptidyl-serine phosphorylation	EC:2.7.11	Transferring phosphorus-containing groups	G3DSA:1.10.510.10 (GENE3D); IPR000719 (PFAM); G3DSA:3.30.200.20 (GENE3D); PTHR11042:SF90 (PANTHER); PTHR11042 (PANTHER); IPR000719 (PROSITE_PROFILES); cd14046 (CDD); IPR011009 (SUPERFAMILY)	F:GO:0004672; F:GO:0005524; P:GO:0006468	F:protein kinase activity; F:ATP binding; P:protein phosphorylation
HSK10491_c0_g3_i1	probable serine/threonine-protein kinase GCN2 isoform X1	217	20	1.59258e-41	87.58	8	F:GO:0000049; F:GO:0004694; F:GO:0005524; P:GO:0006521; P:GO:0009069; P:GO:0009635; P:GO:0010998; P:GO:0018105	F:tRNA binding; F:eukaryotic translation initiation factor 2alpha kinase activity; F:ATP binding; P:regulation of cellular amino acid metabolic process; P:serine family amino acid metabolic process; P:response to herbicide; P:regulation of translational initiation by eIF2 alpha phosphorylation; P:peptidyl-serine phosphorylation	EC:2.7.11	Transferring phosphorus-containing groups	no IPS match	no IPS match	no IPS match
HSK10492_c0_g1_i1	general transcription factor 3C polypeptide 3 isoform X1	808	20	0	83.09	1	F:GO:0005515	F:protein binding			IPR011990 (G3DSA:1.25.40.GENE3D); PTHR23082 (PANTHER); IPR011990 (SUPERFAMILY)	F:GO:0005515	F:protein binding
HSK10493_c0_g1_i1	hypothetical protein CICLE_v10023073mg	905	20	7.78166e-56	73.06	1	C:GO:0016021	C:integral component of membrane			mobidb-lite (MOBIDB_LITE); PTHR34189 (PANTHER); PTHR34189:SF2 (PANTHER)	no GO terms	no GO terms
HSK10493_c0_g1_i2	zeaxanthin epoxidase	872	20	5.08171e-91	87.93	5	F:GO:0004497; C:GO:0016021; P:GO:0044550; P:GO:0055114; F:GO:0071949	F:monooxygenase activity; C:integral component of membrane; P:secondary metabolite biosynthetic process; P:oxidation-reduction process; F:FAD binding			IPR002938 (PFAM); IPR036188 (G3DSA:3.50.50.GENE3D); PTHR13789 (PANTHER); PTHR13789:SF224 (PANTHER); IPR036188 (SUPERFAMILY)	F:GO:0071949	F:FAD binding
HSK10493_c0_g1_i3	zeaxanthin epoxidase	791	20	1.2241e-95	92.77	4	F:GO:0004497; P:GO:0044550; P:GO:0055114; F:GO:0071949	F:monooxygenase activity; P:secondary metabolite biosynthetic process; P:oxidation-reduction process; F:FAD binding			IPR036188 (G3DSA:3.50.50.GENE3D); IPR002938 (PFAM); PTHR13789 (PANTHER); PTHR13789:SF224 (PANTHER); IPR036188 (SUPERFAMILY)	F:GO:0071949	F:FAD binding
HSK10494_c0_g1_i1	hypothetical protein CISIN_1g038131mg, partial	365	20	1.05118e-75	75.86	1	C:GO:0016021	C:integral component of membrane			mobidb-lite (MOBIDB_LITE)	no GO terms	no GO terms
HSK10494_c0_g1_i2	hypothetical protein CISIN_1g004365mg	287	20	8.60499e-54	71.79	1	C:GO:0016021	C:integral component of membrane			mobidb-lite (MOBIDB_LITE)	no GO terms	no GO terms
HSK10495_c0_g1_i1	O-acyltransferase WSD1-like	367	20	9.01435e-56	82.4	6	F:GO:0004144; C:GO:0005886; C:GO:0016021; P:GO:0019432; P:GO:0042967; F:GO:0047196	F:diacylglycerol O-acyltransferase activity; C:plasma membrane; C:integral component of membrane; P:triglyceride biosynthetic process; P:obsolete acyl-carrier-protein biosynthetic process; F:long-chain-alcohol O-fatty-acyltransferase activity	EC:2.3.1.20; EC:2.3.1.75	Diacylglycerol O-acyltransferase; Long-chain-alcohol O-fatty-acyltransferase	PTHR31650:SF2 (PANTHER); PTHR31650 (PANTHER)	no GO terms	no GO terms
HSK10495_c0_g2_i1	O-acyltransferase WSD1-like	1000	20	0	80.35	6	F:GO:0004144; C:GO:0005886; C:GO:0016021; P:GO:0019432; P:GO:0042967; F:GO:0047196	F:diacylglycerol O-acyltransferase activity; C:plasma membrane; C:integral component of membrane; P:triglyceride biosynthetic process; P:obsolete acyl-carrier-protein biosynthetic process; F:long-chain-alcohol O-fatty-acyltransferase activity	EC:2.3.1.20; EC:2.3.1.75	Diacylglycerol O-acyltransferase; Long-chain-alcohol O-fatty-acyltransferase	IPR009721 (PFAM); PTHR31650 (PANTHER); PTHR31650:SF2 (PANTHER)	F:GO:0004144	F:diacylglycerol O-acyltransferase activity
HSK10495_c0_g3_i1	O-acyltransferase WSD1-like	1129	20	0	80.1	6	F:GO:0004144; C:GO:0005886; C:GO:0016021; P:GO:0019432; P:GO:0042967; F:GO:0047196	F:diacylglycerol O-acyltransferase activity; C:plasma membrane; C:integral component of membrane; P:triglyceride biosynthetic process; P:obsolete acyl-carrier-protein biosynthetic process; F:long-chain-alcohol O-fatty-acyltransferase activity	EC:2.3.1.20; EC:2.3.1.75	Diacylglycerol O-acyltransferase; Long-chain-alcohol O-fatty-acyltransferase	IPR004255 (PFAM); IPR009721 (PFAM); mobidb-lite (MOBIDB_LITE); PTHR31650:SF2 (PANTHER); PTHR31650 (PANTHER)	F:GO:0004144; P:GO:0045017	F:diacylglycerol O-acyltransferase activity; P:glycerolipid biosynthetic process
HSK10495_c0_g4_i1	O-acyltransferase WSD1-like	321	20	6.61578e-68	90.11	6	F:GO:0004144; C:GO:0005886; C:GO:0016021; P:GO:0019432; P:GO:0042967; F:GO:0047196	F:diacylglycerol O-acyltransferase activity; C:plasma membrane; C:integral component of membrane; P:triglyceride biosynthetic process; P:obsolete acyl-carrier-protein biosynthetic process; F:long-chain-alcohol O-fatty-acyltransferase activity	EC:2.3.1.20; EC:2.3.1.75	Diacylglycerol O-acyltransferase; Long-chain-alcohol O-fatty-acyltransferase	IPR004255 (PFAM); PTHR31650:SF2 (PANTHER); PTHR31650 (PANTHER)	F:GO:0004144; P:GO:0045017	F:diacylglycerol O-acyltransferase activity; P:glycerolipid biosynthetic process
HSK10496_c0_g1_i1	hypothetical protein CICLE_v10033190mg	427	2	1.15574e-47	89.39						no IPS match	no IPS match	no IPS match
HSK10496_c0_g2_i1	hypothetical protein CISIN_1g0375441mg, partial	482	2	4.48409e-47	82						no IPS match	no IPS match	no IPS match
HSK10497_c0_g1_i1	---NA---	322									no IPS match	no IPS match	no IPS match
HSK10497_c0_g1_i2	transcription factor bHLH110 isoform X1	706	20	3.91091e-80	67.32	5	F:GO:0001046; F:GO:0001228; C:GO:0005634; P:GO:0006366; F:GO:0046983	F:core promoter sequence-specific DNA binding; F:transcriptional activator activity, RNA polymerase II transcription regulatory region sequence-specific DNA binding; C:nucleus; P:transcription by RNA polymerase II; F:protein dimerization activity			PTHR16223 (PANTHER); PTHR16223:SF28 (PANTHER)	no GO terms	no GO terms
HSK10498_c0_g1_i1	---NA---	672									no IPS match	no IPS match	no IPS match
HSK10498_c0_g1_i2	---NA---	821									no IPS match	no IPS match	no IPS match
HSK10499_c0_g1_i1	mitogen-activated protein kinase kinase kinase 18-like	1332	20	0	76.07	9	F:GO:0004674; F:GO:0005524; C:GO:0005737; P:GO:0007346; P:GO:0009069; P:GO:0023014; P:GO:0031098; P:GO:0032147; P:GO:0042981	F:protein serine/threonine kinase activity; F:ATP binding; C:cytoplasm; P:regulation of mitotic cell cycle; P:serine family amino acid metabolic process; P:signal transduction by protein phosphorylation; P:stress-activated protein kinase signaling cascade; P:activation of protein kinase activity; P:regulation of apoptotic process	EC:2.7.11	Transferring phosphorus-containing groups	G3DSA:1.10.510.10 (GENE3D); IPR000719 (PFAM); PIRSF000654 (PIRSF); PTHR24361 (PANTHER); PTHR24361:SF634 (PANTHER); IPR000719 (PROSITE_PROFILES); cd06606 (CDD); IPR011009 (SUPERFAMILY)	F:GO:0004672; F:GO:0005524; P:GO:0006468	F:protein kinase activity; F:ATP binding; P:protein phosphorylation
HSK1050_c0_g1_i1	alkane hydroxylase MAH1-like	243	20	1.48649e-51	81.41	6	F:GO:0004497; F:GO:0005506; C:GO:0016021; F:GO:0016705; F:GO:0020037; P:GO:0055114	F:monooxygenase activity; F:iron ion binding; C:integral component of membrane; F:oxidoreductase activity, acting on paired donors, with incorporation or reduction of molecular oxygen; F:heme binding; P:oxidation-reduction process			PTHR24296 (PANTHER); PTHR24296:SF79 (PANTHER)	no GO terms	no GO terms
HSK10500_c0_g1_i1	F-box protein CPR30-like isoform X1	849	20	3.61932e-176	66.6	2	C:GO:0016020; C:GO:0016021	C:membrane; C:integral component of membrane			IPR017451 (TIGRFAM); IPR006527 (PFAM); PTHR44355 (PANTHER)	no GO terms	no GO terms
HSK10500_c0_g2_i1	F-box/kelch-repeat protein At3g23880-like	613	20	1.63142e-100	68.17	1	F:GO:0005515	F:protein binding			IPR001810 (PFAM); G3DSA:1.20.1280.50 (GENE3D); PTHR44355:SF1 (PANTHER); PTHR44355 (PANTHER); IPR001810 (PROSITE_PROFILES); IPR036047 (SUPERFAMILY)	F:GO:0005515	F:protein binding
HSK10501_c0_g1_i1	---NA---	791									no IPS match	no IPS match	no IPS match
HSK10501_c0_g1_i2	---NA---	426									no IPS match	no IPS match	no IPS match
HSK10502_c0_g1_i1	piriformospora indica-insensitive protein 2	284	20	5.98697e-47	86.13	6	F:GO:0005515; P:GO:0009860; C:GO:0016021; F:GO:0016301; P:GO:0016310; C:GO:0016324	F:protein binding; P:pollen tube growth; C:integral component of membrane; F:kinase activity; P:phosphorylation; C:apical plasma membrane			IPR001611 (PFAM); IPR032675 (G3DSA:3.80.10.GENE3D); PTHR44325 (PANTHER); PTHR44325:SF3 (PANTHER); SSF52058 (SUPERFAMILY)	F:GO:0005515	F:protein binding
HSK10502_c0_g2_i1	piriformospora indica-insensitive protein 2-like	296	20	5.93545e-58	82.93	6	F:GO:0005515; C:GO:0016021; F:GO:0016301; P:GO:0016310; F:GO:0032440; P:GO:0055114	F:protein binding; C:integral component of membrane; F:kinase activity; P:phosphorylation; F:2-alkenal reductase [NAD(P)] activity; P:oxidation-reduction process	EC:1.3.1.74	2-alkenal reductase (NAD(P)(+))	IPR001611 (PFAM); IPR032675 (G3DSA:3.80.10.GENE3D); IPR001611 (PFAM); PTHR44325:SF3 (PANTHER); PTHR44325 (PANTHER); SSF52058 (SUPERFAMILY)	F:GO:0005515	F:protein binding
HSK10503_c0_g1_i1	licodione synthase-like	503	20	7.74035e-96	86.06	6	F:GO:0004497; F:GO:0005506; C:GO:0016021; F:GO:0016705; F:GO:0020037; P:GO:0055114	F:monooxygenase activity; F:iron ion binding; C:integral component of membrane; F:oxidoreductase activity, acting on paired donors, with incorporation or reduction of molecular oxygen; F:heme binding; P:oxidation-reduction process			IPR001128 (PFAM); IPR036396 (G3DSA:1.10.630.GENE3D); PTHR24298 (PANTHER); PTHR24298:SF170 (PANTHER); IPR036396 (SUPERFAMILY)	F:GO:0005506; F:GO:0016705; F:GO:0020037; P:GO:0055114	F:iron ion binding; F:oxidoreductase activity, acting on paired donors, with incorporation or reduction of molecular oxygen; F:heme binding; P:oxidation-reduction process
HSK10503_c0_g2_i1	licodione synthase-like	473	20	4.25867e-83	87.81	6	F:GO:0005506; C:GO:0016021; F:GO:0016709; F:GO:0020037; P:GO:0044550; P:GO:0055114	F:iron ion binding; C:integral component of membrane; F:oxidoreductase activity, acting on paired donors, with incorporation or reduction of molecular oxygen, NAD(P)H as one donor, and incorporation of one atom of oxygen; F:heme binding; P:secondary metabolite biosynthetic process; P:oxidation-reduction process	EC:1.14.13	Acting on paired donors, with incorporation or reduction of molecular oxygen. The oxygen incorporated need not be derived from O(2)	IPR002401 (PRINTS); IPR036396 (G3DSA:1.10.630.GENE3D); IPR001128 (PFAM); PTHR24298:SF170 (PANTHER); PTHR24298 (PANTHER); IPR036396 (SUPERFAMILY)	F:GO:0005506; F:GO:0016705; F:GO:0020037; P:GO:0055114	F:iron ion binding; F:oxidoreductase activity, acting on paired donors, with incorporation or reduction of molecular oxygen; F:heme binding; P:oxidation-reduction process
HSK10504_c0_g1_i1	auxin-responsive family protein	607	20	5.81048e-62	86.82	1	P:GO:0009733	P:response to auxin			IPR003676 (PFAM); PTHR31374 (PANTHER); PTHR31374:SF46 (PANTHER)	P:GO:0009733	P:response to auxin
HSK10505_c0_g1_i1	Ribosome maturation factor RimP	1026	20	2.39999e-173	90.13	1	P:GO:0042274	P:ribosomal small subunit biogenesis			mobidb-lite (MOBIDB_LITE); PTHR34544 (PANTHER); PTHR34544:SF1 (PANTHER); IPR003728 (HAMAP)	P:GO:0042274	P:ribosomal small subunit biogenesis
HSK10506_c0_g1_i1	---NA---	1052									no IPS match	no IPS match	no IPS match
HSK10507_c0_g1_i1	oxysterol-binding protein-related protein 4B	1357	20	0	86.43						IPR000648 (PFAM); G3DSA:2.40.160.120 (GENE3D); G3DSA:1.20.120.1290 (GENE3D); PTHR10972:SF102 (PANTHER); IPR000648 (PANTHER); IPR037239 (SUPERFAMILY)	no GO terms	no GO terms
HSK10508_c0_g1_i1	L-ascorbate oxidase homolog	752	20	1.13009e-123	95.72	8	F:GO:0005507; P:GO:0006118; F:GO:0008447; C:GO:0009505; C:GO:0009506; F:GO:0016722; P:GO:0019852; P:GO:0055114	F:copper ion binding; P:obsolete electron transport; F:L-ascorbate oxidase activity; C:plant-type cell wall; C:plasmodesma; F:oxidoreductase activity, oxidizing metal ions; P:L-ascorbic acid metabolic process; P:oxidation-reduction process	EC:1.10.3; EC:1.10.3.3	Acting on diphenols and related substances as donors; L-ascorbate oxidase	IPR008972 (G3DSA:2.60.40.GENE3D); IPR011706 (PFAM); PTHR11709 (PANTHER); PTHR11709:SF11 (PANTHER); IPR008972 (SUPERFAMILY)	F:GO:0005507; F:GO:0016491; P:GO:0055114	F:copper ion binding; F:oxidoreductase activity; P:oxidation-reduction process
HSK10508_c0_g2_i1	L-ascorbate oxidase homolog	1363	20	0	93.56	5	F:GO:0005507; P:GO:0006118; F:GO:0008447; P:GO:0019852; P:GO:0055114	F:copper ion binding; P:obsolete electron transport; F:L-ascorbate oxidase activity; P:L-ascorbic acid metabolic process; P:oxidation-reduction process	EC:1.10.3; EC:1.10.3.3	Acting on diphenols and related substances as donors; L-ascorbate oxidase	IPR008972 (G3DSA:2.60.40.GENE3D); IPR001117 (PFAM); IPR011707 (PFAM); IPR008972 (G3DSA:2.60.40.GENE3D); PTHR11709 (PANTHER); PTHR11709:SF11 (PANTHER); IPR034273 (CDD); IPR008972 (SUPERFAMILY); IPR008972 (SUPERFAMILY)	F:GO:0005507; P:GO:0055114	F:copper ion binding; P:oxidation-reduction process
HSK10509_c0_g1_i1	midasin isoform X2	1088	20	0	95.83	4	P:GO:0000027; F:GO:0005524; C:GO:0005634; F:GO:0016887	P:ribosomal large subunit assembly; F:ATP binding; C:nucleus; F:ATPase activity	EC:3.6.1.3; EC:3.6.1.15	Adenosinetriphosphatase; Nucleoside-triphosphate phosphatase	PTHR22908 (PANTHER); PTHR22908:SF66 (PANTHER); IPR002035 (PROSITE_PROFILES); IPR036465 (SUPERFAMILY)	no GO terms	no GO terms
HSK10510_c0_g1_i1	---NA---	239									no IPS match	no IPS match	no IPS match
HSK10510_c0_g2_i1	F-box protein At3g07870-like	1609	20	0	85.7	3	F:GO:0005515; P:GO:0008284; C:GO:0009506	F:protein binding; P:positive regulation of cell proliferation; C:plasmodesma			IPR001810 (PFAM); IPR017451 (TIGRFAM); IPR013187 (PFAM); G3DSA:1.20.1280.50 (GENE3D); PTHR31790 (PANTHER); PTHR31790:SF18 (PANTHER); IPR001810 (PROSITE_PROFILES); IPR036047 (SUPERFAMILY)	F:GO:0005515	F:protein binding
HSK10510_c0_g2_i2	F-box protein At3g07870-like	1784	20	0	85.7	3	F:GO:0005515; P:GO:0008284; C:GO:0009506	F:protein binding; P:positive regulation of cell proliferation; C:plasmodesma			IPR001810 (PFAM); IPR017451 (TIGRFAM); IPR013187 (PFAM); G3DSA:1.20.1280.50 (GENE3D); PTHR31790 (PANTHER); PTHR31790:SF18 (PANTHER); IPR001810 (PROSITE_PROFILES); IPR036047 (SUPERFAMILY)	F:GO:0005515	F:protein binding
HSK10511_c0_g1_i1	plant UBX domain-containing protein 10-like	764	20	1.66309e-168	84.12	1	F:GO:0005515	F:protein binding			IPR001012 (PFAM); G3DSA:3.10.20.90 (GENE3D); mobidb-lite (MOBIDB_LITE); PTHR23322:SF32 (PANTHER); PTHR23322 (PANTHER); IPR001012 (PROSITE_PROFILES); IPR029071 (SUPERFAMILY)	F:GO:0005515	F:protein binding
HSK10511_c0_g2_i1	plant UBX domain-containing protein 10	512	20	2.55057e-117	84.93						G3DSA:3.40.30.10 (GENE3D); PTHR23322:SF32 (PANTHER); PTHR23322 (PANTHER); IPR036249 (SUPERFAMILY)	no GO terms	no GO terms
HSK10512_c0_g1_i1	hypothetical protein CICLE_v10030089mg	682	20	5.73905e-95	75.41						mobidb-lite (MOBIDB_LITE); mobidb-lite (MOBIDB_LITE); PTHR33148 (PANTHER); PTHR33148:SF4 (PANTHER)	no GO terms	no GO terms
HSK10513_c0_g1_i1	Histone H4	603	20	1.31643e-44	92.01	7	C:GO:0000786; F:GO:0003677; C:GO:0005634; C:GO:0016021; F:GO:0022857; F:GO:0046982; P:GO:0055085	C:nucleosome; F:DNA binding; C:nucleus; C:integral component of membrane; F:transmembrane transporter activity; F:protein heterodimerization activity; P:transmembrane transport			no IPS match	no IPS match	no IPS match
HSK10514_c0_g1_i1	protein RADIALIS-like 1	785	20	9.16214e-49	92.68	2	F:GO:0003677; C:GO:0005634	F:DNA binding; C:nucleus			G3DSA:1.10.10.60 (GENE3D); IPR001005 (PFAM); PTHR43952:SF9 (PANTHER); PTHR43952 (PANTHER); IPR017884 (PROSITE_PROFILES); IPR001005 (CDD); IPR009057 (SUPERFAMILY)	F:GO:0003677	F:DNA binding
HSK10514_c0_g1_i2	protein RADIALIS-like 1	750	20	7.37717e-55	88.77	2	F:GO:0003677; C:GO:0005634	F:DNA binding; C:nucleus			IPR001005 (PFAM); G3DSA:1.10.10.60 (GENE3D); mobidb-lite (MOBIDB_LITE); PTHR43952:SF9 (PANTHER); PTHR43952 (PANTHER); IPR017884 (PROSITE_PROFILES); IPR001005 (CDD); IPR009057 (SUPERFAMILY)	F:GO:0003677	F:DNA binding
HSK10514_c1_g1_i1	---NA---	346									no IPS match	no IPS match	no IPS match
HSK10515_c0_g1_i1	probable plastid-lipid-associated protein 11 isoform X1	958	20	8.09089e-162	88.4						IPR006843 (PFAM); mobidb-lite (MOBIDB_LITE); PTHR31906:SF3 (PANTHER); PTHR31906 (PANTHER)	no GO terms	no GO terms
HSK10515_c0_g1_i2	probable plastid-lipid-associated protein 11 isoform X1	1176	20	1.31309e-160	88.4						IPR006843 (PFAM); mobidb-lite (MOBIDB_LITE); PTHR31906:SF3 (PANTHER); PTHR31906 (PANTHER)	no GO terms	no GO terms
HSK10516_c0_g1_i1	---NA---	1130									no IPS match	no IPS match	no IPS match
HSK10516_c0_g1_i2	---NA---	346									no IPS match	no IPS match	no IPS match
HSK10517_c0_g1_i1	small nuclear ribonucleoprotein Sm D2-like	889	20	3.70619e-69	98.15	2	P:GO:0008380; C:GO:0030532	P:RNA splicing; C:small nuclear ribonucleoprotein complex			no IPS match	no IPS match	no IPS match
HSK10518_c0_g1_i1	probable pectinesterase 53	481	20	2.4479e-81	84.65	8	C:GO:0005618; P:GO:0005982; P:GO:0005985; F:GO:0016829; F:GO:0030599; P:GO:0042545; F:GO:0045330; P:GO:0045490	C:cell wall; P:starch metabolic process; P:sucrose metabolic process; F:lyase activity; F:pectinesterase activity; P:cell wall modification; F:aspartyl esterase activity; P:pectin catabolic process	EC:3.1.1.11; EC:3.1.1.1	Pectinesterase; Carboxylesterase	IPR012334 (G3DSA:2.160.20.GENE3D); PTHR31321:SF17 (PANTHER); PTHR31321 (PANTHER); IPR011050 (SUPERFAMILY)	no GO terms	no GO terms
HSK10518_c0_g2_i1	probable pectinesterase 53	769	20	0	96.56	8	C:GO:0005618; P:GO:0005982; P:GO:0005985; F:GO:0016829; F:GO:0030599; P:GO:0042545; F:GO:0045330; P:GO:0045490	C:cell wall; P:starch metabolic process; P:sucrose metabolic process; F:lyase activity; F:pectinesterase activity; P:cell wall modification; F:aspartyl esterase activity; P:pectin catabolic process	EC:3.1.1.11; EC:3.1.1.1	Pectinesterase; Carboxylesterase	IPR012334 (G3DSA:2.160.20.GENE3D); IPR000070 (PFAM); PTHR31321:SF17 (PANTHER); PTHR31321 (PANTHER); IPR011050 (SUPERFAMILY)	C:GO:0005618; F:GO:0030599; P:GO:0042545	C:cell wall; F:pectinesterase activity; P:cell wall modification
HSK10519_c0_g1_i1	probable WRKY transcription factor 23	1149	20	0	75.89	6	F:GO:0003700; C:GO:0005634; C:GO:0005667; P:GO:0006355; P:GO:0006355; F:GO:0043565	F:DNA binding transcription factor activity; C:nucleus; C:transcription factor complex; P:regulation of transcription, DNA-templated; P:regulation of transcription, DNA-templated; F:sequence-specific DNA binding			IPR036576 (G3DSA:2.20.25.GENE3D); IPR017396 (PIRSF); IPR003657 (PFAM); mobidb-lite (MOBIDB_LITE); mobidb-lite (MOBIDB_LITE); PTHR31221 (PANTHER); PTHR31221:SF80 (PANTHER); IPR003657 (PROSITE_PROFILES); IPR036576 (SUPERFAMILY)	F:GO:0003700; P:GO:0006355; F:GO:0043565	F:DNA binding transcription factor activity; P:regulation of transcription, DNA-templated; F:sequence-specific DNA binding
HSK1052_c0_g1_i1	premnaspirodiene oxygenase-like	786	20	2.20076e-140	86.92	6	F:GO:0004497; F:GO:0005506; C:GO:0016021; F:GO:0016705; F:GO:0020037; P:GO:0055114	F:monooxygenase activity; F:iron ion binding; C:integral component of membrane; F:oxidoreductase activity, acting on paired donors, with incorporation or reduction of molecular oxygen; F:heme binding; P:oxidation-reduction process			IPR002401 (PRINTS); IPR001128 (PRINTS); IPR001128 (PFAM); IPR036396 (G3DSA:1.10.630.GENE3D); PTHR24298 (PANTHER); PTHR24298:SF144 (PANTHER); IPR036396 (SUPERFAMILY)	F:GO:0005506; F:GO:0016705; F:GO:0020037; P:GO:0055114	F:iron ion binding; F:oxidoreductase activity, acting on paired donors, with incorporation or reduction of molecular oxygen; F:heme binding; P:oxidation-reduction process
HSK10520_c0_g1_i1	SPX domain-containing membrane protein At4g22990-like isoform X1	1192	20	0	88.09	2	C:GO:0016021; P:GO:0055085	C:integral component of membrane; P:transmembrane transport			mobidb-lite (MOBIDB_LITE); PTHR23510 (PANTHER); PTHR23510:SF55 (PANTHER); PS51257 (PROSITE_PROFILES); IPR036259 (SUPERFAMILY)	no GO terms	no GO terms
HSK10521_c0_g1_i1	DNA ligase 1-like isoform X1	1325	20	0	78.61						mobidb-lite (MOBIDB_LITE); mobidb-lite (MOBIDB_LITE); mobidb-lite (MOBIDB_LITE); PTHR36005 (PANTHER)	no GO terms	no GO terms
HSK10522_c0_g1_i1	8-amino-7-oxononanoate synthase	428	20	6.31097e-62	86.77	6	P:GO:0006768; F:GO:0008483; F:GO:0008710; P:GO:0009058; C:GO:0016021; F:GO:0030170	P:biotin metabolic process; F:transaminase activity; F:8-amino-7-oxononanoate synthase activity; P:biosynthetic process; C:integral component of membrane; F:pyridoxal phosphate binding	EC:2.3.1.47	8-amino-7-oxononanoate synthase	IPR015422 (G3DSA:3.90.1150.GENE3D); PTHR13693:SF77 (PANTHER); PTHR13693 (PANTHER); IPR015424 (SUPERFAMILY)	F:GO:0003824	F:catalytic activity
HSK10522_c0_g2_i1	8-amino-7-oxononanoate synthase	1211	20	0	86.2	4	F:GO:0003824; P:GO:0009058; C:GO:0016021; F:GO:0030170	F:catalytic activity; P:biosynthetic process; C:integral component of membrane; F:pyridoxal phosphate binding			IPR015421 (G3DSA:3.40.640.GENE3D); IPR004839 (PFAM); PTHR13693:SF77 (PANTHER); PTHR13693 (PANTHER); IPR015424 (SUPERFAMILY)	F:GO:0003824; P:GO:0009058; F:GO:0030170	F:catalytic activity; P:biosynthetic process; F:pyridoxal phosphate binding
HSK10523_c0_g1_i1	presenilin-like protein At2g29900	1468	20	0	85.91	6	C:GO:0000139; F:GO:0004190; C:GO:0005789; P:GO:0007219; C:GO:0016021; P:GO:0016485	C:Golgi membrane; F:aspartic-type endopeptidase activity; C:endoplasmic reticulum membrane; P:Notch signaling pathway; C:integral component of membrane; P:protein processing	EC:3.4.23	Acting on peptide bonds (peptidases)	IPR001108 (PRINTS); IPR001108 (PFAM); G3DSA:1.10.472.100 (GENE3D); IPR001108 (PANTHER); PTHR10202:SF22 (PANTHER)	F:GO:0004190; C:GO:0016021; P:GO:0016485	F:aspartic-type endopeptidase activity; C:integral component of membrane; P:protein processing
HSK10524_c0_g1_i1	cold and drought-regulated protein CORA-like	678	5	7.33804e-14	90.83						IPR010800 (PFAM); mobidb-lite (MOBIDB_LITE); PTHR37389 (PANTHER); PTHR37389:SF3 (PANTHER)	no GO terms	no GO terms
HSK10525_c0_g1_i1	Nitronate monooxygenase	1416	20	2.75674e-168	92.91	7	C:GO:0005829; P:GO:0006807; P:GO:0009610; F:GO:0018580; P:GO:0046686; F:GO:0051213; P:GO:0055114	C:cytosol; P:nitrogen compound metabolic process; P:response to symbiotic fungus; F:nitronate monooxygenase activity; P:response to cadmium ion; F:dioxygenase activity; P:oxidation-reduction process	EC:1.13.12.16; EC:1.13.12	Nitronate monooxygenase; Acting on single donors with incorporation of molecular oxygen (oxygenases). The oxygen incorporated need not be derived from O(2)	IPR013785 (G3DSA:3.20.20.GENE3D); IPR004136 (PFAM); PTHR32332:SF20 (PANTHER); PTHR32332 (PANTHER); SSF51412 (SUPERFAMILY)	F:GO:0003824; F:GO:0018580; P:GO:0055114	F:catalytic activity; F:nitronate monooxygenase activity; P:oxidation-reduction process
HSK10525_c0_g1_i2	nitronate monooxygenase-like	1456	20	0	92.84	7	C:GO:0005829; P:GO:0006807; P:GO:0009610; F:GO:0018580; P:GO:0046686; F:GO:0051213; P:GO:0055114	C:cytosol; P:nitrogen compound metabolic process; P:response to symbiotic fungus; F:nitronate monooxygenase activity; P:response to cadmium ion; F:dioxygenase activity; P:oxidation-reduction process	EC:1.13.12.16; EC:1.13.12	Nitronate monooxygenase; Acting on single donors with incorporation of molecular oxygen (oxygenases). The oxygen incorporated need not be derived from O(2)	IPR004136 (PFAM); IPR013785 (G3DSA:3.20.20.GENE3D); PTHR32332 (PANTHER); PTHR32332:SF20 (PANTHER); cd04730 (CDD); SSF51412 (SUPERFAMILY)	F:GO:0003824; F:GO:0018580; P:GO:0055114	F:catalytic activity; F:nitronate monooxygenase activity; P:oxidation-reduction process
HSK10525_c0_g1_i3	nitronate monooxygenase isoform X1	809	20	1.15677e-63	94.31	9	F:GO:0004318; C:GO:0005835; P:GO:0006633; P:GO:0006807; P:GO:0009610; F:GO:0018580; P:GO:0042967; P:GO:0046686; P:GO:0055114	F:enoyl-[acyl-carrier-protein] reductase (NADH) activity; C:fatty acid synthase complex; P:fatty acid biosynthetic process; P:nitrogen compound metabolic process; P:response to symbiotic fungus; F:nitronate monooxygenase activity; P:obsolete acyl-carrier-protein biosynthetic process; P:response to cadmium ion; P:oxidation-reduction process	EC:2.3.1.85; EC:1.13.12.16; EC:1.3.1.9; EC:1.13.12	Fatty-acid synthase; Nitronate monooxygenase; Enoyl-[acyl-carrier-protein] reductase (NADH); Acting on single donors with incorporation of molecular oxygen (oxygenases). The oxygen incorporated need not be derived from O(2)	IPR013785 (G3DSA:3.20.20.GENE3D); IPR004136 (PFAM); PTHR32332 (PANTHER); PTHR32332:SF20 (PANTHER); cd04730 (CDD); SSF51412 (SUPERFAMILY)	F:GO:0003824; F:GO:0018580; P:GO:0055114	F:catalytic activity; F:nitronate monooxygenase activity; P:oxidation-reduction process
HSK10526_c0_g1_i1	---NA---	1115									no IPS match	no IPS match	no IPS match
HSK10527_c0_g1_i1	hypothetical protein CUMW_142700	724	20	4.08998e-126	70.32						no IPS match	no IPS match	no IPS match
HSK10528_c0_g1_i1	F-box protein CPR30	1243	20	3.96502e-20	50.18	1	F:GO:0016874	F:ligase activity			no IPS match	no IPS match	no IPS match
HSK10529_c0_g1_i1	---NA---	383									PS51257 (PROSITE_PROFILES)	no GO terms	no GO terms
HSK10529_c0_g1_i2	---NA---	201									mobidb-lite (MOBIDB_LITE)	no GO terms	no GO terms
HSK1053_c0_g1_i1	---NA---	204									no IPS match	no IPS match	no IPS match
HSK10530_c0_g1_i1	probable glycosyltransferase At5g03795	1038	20	0	75.38	2	P:GO:0006486; F:GO:0016757	P:protein glycosylation; F:transferase activity, transferring glycosyl groups			IPR004263 (PFAM); PTHR11062 (PANTHER); PTHR11062:SF66 (PANTHER)	P:GO:0006486; F:GO:0016757	P:protein glycosylation; F:transferase activity, transferring glycosyl groups
HSK10530_c0_g2_i1	probable glycosyltransferase At5g03795	380	12	8.12706e-08	93.67	2	P:GO:0006486; F:GO:0016757	P:protein glycosylation; F:transferase activity, transferring glycosyl groups			no IPS match	no IPS match	no IPS match
HSK10530_c0_g3_i1	probable glycosyltransferase At5g03795	641	20	2.52382e-134	93.26	3	P:GO:0006486; C:GO:0016021; F:GO:0050508	P:protein glycosylation; C:integral component of membrane; F:glucuronosyl-N-acetylglucosaminyl-proteoglycan 4-alpha-N-acetylglucosaminyltransferase activity	EC:2.4.1.224	Glucuronosyl-N-acetylglucosaminyl-proteoglycan 4-alpha-N-	IPR004263 (PFAM); G3DSA:3.40.50.2000 (GENE3D); PTHR11062:SF66 (PANTHER); PTHR11062 (PANTHER)	P:GO:0006486; F:GO:0016757	P:protein glycosylation; F:transferase activity, transferring glycosyl groups
HSK10531_c0_g1_i1	pentatricopeptide repeat-containing protein At4g16390, chloroplastic	2306	20	0	86.53	7	F:GO:0003723; F:GO:0004519; F:GO:0005515; P:GO:0009451; C:GO:0009507; P:GO:0031425; P:GO:0090305	F:RNA binding; F:endonuclease activity; F:protein binding; P:RNA modification; C:chloroplast; P:chloroplast RNA processing; P:nucleic acid phosphodiester bond hydrolysis			IPR002885 (PFAM); IPR011990 (G3DSA:1.25.40.GENE3D); IPR002885 (TIGRFAM); IPR033443 (PFAM); IPR002885 (PFAM); IPR011990 (G3DSA:1.25.40.GENE3D); mobidb-lite (MOBIDB_LITE); PTHR24015:SF437 (PANTHER); PTHR24015 (PANTHER); IPR002885 (PROSITE_PROFILES); IPR002885 (PROSITE_PROFILES); IPR002885 (PROSITE_PROFILES); IPR002885 (PROSITE_PROFILES); IPR002885 (PROSITE_PROFILES); IPR002885 (PROSITE_PROFILES); I…	F:GO:0005515	F:protein binding
HSK10532_c0_g1_i1	B-cell receptor-associated protein 31	603	20	3.74569e-55	89.7	5	C:GO:0005789; P:GO:0006886; P:GO:0006888; C:GO:0016021; P:GO:0070973	C:endoplasmic reticulum membrane; P:intracellular protein transport; P:ER to Golgi vesicle-mediated transport; C:integral component of membrane; P:protein localization to endoplasmic reticulum exit site			IPR008417 (PFAM); G3DSA:1.20.5.110 (GENE3D); IPR008417 (PANTHER); PTHR12701:SF30 (PANTHER)	C:GO:0005783; P:GO:0006886; C:GO:0016021	C:endoplasmic reticulum; P:intracellular protein transport; C:integral component of membrane
HSK10532_c0_g1_i2	B-cell receptor-associated protein 31	1108	20	8.17774e-110	90.39	5	C:GO:0005789; P:GO:0006886; P:GO:0006888; C:GO:0016021; P:GO:0070973	C:endoplasmic reticulum membrane; P:intracellular protein transport; P:ER to Golgi vesicle-mediated transport; C:integral component of membrane; P:protein localization to endoplasmic reticulum exit site			IPR008417 (PFAM); G3DSA:1.20.5.110 (GENE3D); PTHR12701:SF30 (PANTHER); IPR008417 (PANTHER)	C:GO:0005783; P:GO:0006886; C:GO:0016021	C:endoplasmic reticulum; P:intracellular protein transport; C:integral component of membrane
HSK10533_c0_g1_i1	aquaporin NIP1-2-like	1274	20	0	89.22	4	C:GO:0005887; P:GO:0006833; F:GO:0015250; P:GO:0034220	C:integral component of plasma membrane; P:water transport; F:water channel activity; P:ion transmembrane transport			IPR000425 (PRINTS); IPR023271 (G3DSA:1.20.1080.GENE3D); IPR000425 (PFAM); IPR000425 (TIGRFAM); PTHR19139:SF155 (PANTHER); IPR034294 (PANTHER); IPR000425 (CDD); IPR023271 (SUPERFAMILY)	F:GO:0015267; C:GO:0016020; P:GO:0055085	F:channel activity; C:membrane; P:transmembrane transport
HSK10534_c0_g1_i1	4-coumarate--CoA ligase-like 6	249	20	5.43342e-48	80.6	3	F:GO:0003824; P:GO:0008152; C:GO:0016021	F:catalytic activity; P:metabolic process; C:integral component of membrane			G3DSA:3.40.50.980 (GENE3D); IPR000873 (PFAM); PTHR24096 (PANTHER); PTHR24096:SF261 (PANTHER); SSF56801 (SUPERFAMILY)	F:GO:0003824; P:GO:0008152	F:catalytic activity; P:metabolic process
HSK10534_c0_g2_i1	4-coumarate--CoA ligase-like 6	300	20	6.77916e-36	80.53	3	P:GO:0008152; C:GO:0016021; F:GO:0016874	P:metabolic process; C:integral component of membrane; F:ligase activity			no IPS match	no IPS match	no IPS match
HSK10534_c0_g3_i1	4-coumarate--CoA ligase-like 6	924	20	0	86.74	3	P:GO:0008152; C:GO:0016021; F:GO:0016874	P:metabolic process; C:integral component of membrane; F:ligase activity			IPR000873 (PFAM); G3DSA:3.30.300.30 (GENE3D); G3DSA:3.40.50.12780 (GENE3D); PTHR24096:SF261 (PANTHER); PTHR24096 (PANTHER); SSF56801 (SUPERFAMILY)	F:GO:0003824; P:GO:0008152	F:catalytic activity; P:metabolic process
HSK10534_c0_g3_i2	4-coumarate--CoA ligase-like 6	778	20	1.53431e-154	86.72	3	P:GO:0008152; C:GO:0016021; F:GO:0016874	P:metabolic process; C:integral component of membrane; F:ligase activity			IPR000873 (PFAM); G3DSA:3.40.50.12780 (GENE3D); PTHR24096:SF261 (PANTHER); PTHR24096 (PANTHER); SSF56801 (SUPERFAMILY)	F:GO:0003824; P:GO:0008152	F:catalytic activity; P:metabolic process
HSK10535_c0_g1_i1	probable aminotransferase TAT2	1570	20	0	88.32	8	P:GO:0000162; F:GO:0004838; P:GO:0006103; P:GO:0006536; P:GO:0006571; P:GO:0009094; P:GO:0009821; F:GO:0030170	P:tryptophan biosynthetic process; F:L-tyrosine:2-oxoglutarate aminotransferase activity; P:2-oxoglutarate metabolic process; P:glutamate metabolic process; P:tyrosine biosynthetic process; P:L-phenylalanine biosynthetic process; P:alkaloid biosynthetic process; F:pyridoxal phosphate binding	EC:2.6.1.5	Tyrosine transaminase	IPR005958 (PIRSF); IPR004839 (PFAM); IPR005958 (TIGRFAM); IPR015421 (G3DSA:3.40.640.GENE3D); IPR015422 (G3DSA:3.90.1150.GENE3D); PTHR11751:SF387 (PANTHER); PTHR11751 (PANTHER); cd00609 (CDD); IPR015424 (SUPERFAMILY)	F:GO:0003824; P:GO:0006520; F:GO:0008483; P:GO:0009058; F:GO:0030170	F:catalytic activity; P:cellular amino acid metabolic process; F:transaminase activity; P:biosynthetic process; F:pyridoxal phosphate binding
HSK10536_c0_g1_i1	50S ribosomal protein L15, chloroplastic	1080	20	2.37413e-164	87.39	7	F:GO:0003735; P:GO:0006412; C:GO:0009570; P:GO:0009735; C:GO:0009941; C:GO:0015934; P:GO:0042254	F:structural constituent of ribosome; P:translation; C:chloroplast stroma; P:response to cytokinin; C:chloroplast envelope; C:large ribosomal subunit; P:ribosome biogenesis			IPR005749 (TIGRFAM); G3DSA:3.100.10.10 (GENE3D); IPR021131 (PFAM); mobidb-lite (MOBIDB_LITE); PTHR12934:SF11 (PANTHER); IPR005749 (PANTHER); IPR030878 (HAMAP); IPR036227 (SUPERFAMILY)	F:GO:0003735; P:GO:0006412; C:GO:0015934	F:structural constituent of ribosome; P:translation; C:large ribosomal subunit
HSK10537_c0_g1_i1	Complex 1 LYR protein	568	20	2.59252e-41	92.38						PTHR36724 (PANTHER)	no GO terms	no GO terms
HSK10537_c0_g1_i2	Complex 1 LYR protein	594	20	3.40162e-41	92.38						PTHR36724 (PANTHER)	no GO terms	no GO terms
HSK10538_c0_g1_i1	UDP-glycosyltransferase 83A1-like	576	20	2.39071e-134	80.41	2	P:GO:0008152; F:GO:0016758	P:metabolic process; F:transferase activity, transferring hexosyl groups			G3DSA:3.40.50.2000 (GENE3D); PTHR11926 (PANTHER); PTHR11926:SF162 (PANTHER); SSF53756 (SUPERFAMILY)	no GO terms	no GO terms
HSK10539_c0_g1_i1	high-affinity nitrate transporter 3.2-like	865	20	6.29208e-126	87.09	3	P:GO:0010167; P:GO:0015706; C:GO:0016021	P:response to nitrate; P:nitrate transport; C:integral component of membrane			IPR016605 (PFAM); IPR016605 (PIRSF); IPR016605 (PANTHER); PTHR34806:SF1 (PANTHER)	P:GO:0010167; P:GO:0015706	P:response to nitrate; P:nitrate transport
HSK1054_c0_g1_i1	hypothetical protein CICLE_v10016616mg	412	20	4.31429e-64	69.98	1	C:GO:0016021	C:integral component of membrane			PTHR33430 (PANTHER)	no GO terms	no GO terms
HSK10540_c0_g1_i1	LOB domain-containing protein 42	927	20	7.45424e-162	70.14						IPR004883 (PFAM); mobidb-lite (MOBIDB_LITE); mobidb-lite (MOBIDB_LITE); PTHR31304 (PANTHER); PTHR31304 (PANTHER); PTHR31304:SF9 (PANTHER); IPR004883 (PROSITE_PROFILES)	no GO terms	no GO terms
HSK10541_c0_g1_i1	---NA---	397									no IPS match	no IPS match	no IPS match
HSK10541_c0_g1_i2	---NA---	416									no IPS match	no IPS match	no IPS match
HSK10542_c0_g1_i1	DUF659 domain-containing protein/Dimer_Tnp_hAT domain-containing protein	1281	20	0	82.53	1	F:GO:0046983	F:protein dimerization activity			PTHR32166 (PANTHER); PTHR32166:SF27 (PANTHER); IPR012337 (SUPERFAMILY)	no GO terms	no GO terms
HSK10543_c0_g1_i1	hypothetical protein CISIN_1g039615mg	988	1	2.21511e-46	98.73						no IPS match	no IPS match	no IPS match
HSK10544_c0_g1_i1	stress response protein NST1-like	1436	20	1.97447e-124	78.03						mobidb-lite (MOBIDB_LITE); mobidb-lite (MOBIDB_LITE); PTHR37076:SF2 (PANTHER); PTHR37076 (PANTHER)	no GO terms	no GO terms
HSK10544_c0_g1_i2	stress response protein NST1-like	960	20	2.63466e-126	78.74						mobidb-lite (MOBIDB_LITE); PTHR37076 (PANTHER); PTHR37076:SF2 (PANTHER)	no GO terms	no GO terms
HSK10544_c0_g1_i3	stress response protein NST1-like	1564	20	1.33974e-123	78.11						mobidb-lite (MOBIDB_LITE); PTHR37076 (PANTHER); PTHR37076:SF2 (PANTHER)	no GO terms	no GO terms
HSK10545_c0_g1_i1	---NA---	221									no IPS match	no IPS match	no IPS match
HSK10545_c0_g1_i2	small nuclear ribonucleoprotein-associated protein B	1395	20	4.44053e-80	95.57	10	P:GO:0000398; F:GO:0003723; C:GO:0005682; C:GO:0005685; C:GO:0005686; C:GO:0005687; C:GO:0005737; C:GO:0046540; C:GO:0071004; C:GO:0071013	P:mRNA splicing, via spliceosome; F:RNA binding; C:U5 snRNP; C:U1 snRNP; C:U2 snRNP; C:U4 snRNP; C:cytoplasm; C:U4/U6 x U5 tri-snRNP complex; C:U2-type prespliceosome; C:catalytic step 2 spliceosome			IPR001163 (PFAM); G3DSA:2.30.30.100 (GENE3D); mobidb-lite (MOBIDB_LITE); cd01717 (CDD); IPR010920 (SUPERFAMILY)	no GO terms	no GO terms
HSK10546_c0_g1_i1	---NA---	231									no IPS match	no IPS match	no IPS match
HSK10546_c0_g2_i1	---NA---	436									no IPS match	no IPS match	no IPS match
HSK10547_c0_g1_i1	auxin-induced protein 15A-like	539	20	1.64778e-68	90.66	1	P:GO:0009733	P:response to auxin			IPR003676 (PFAM); PTHR31929 (PANTHER); PTHR31929:SF22 (PANTHER)	P:GO:0009733	P:response to auxin
HSK10547_c0_g2_i1	auxin-responsive protein SAUR21-like	499	20	1.21133e-68	84.6	1	P:GO:0009733	P:response to auxin			IPR003676 (PFAM); PTHR31929:SF22 (PANTHER); PTHR31929 (PANTHER)	P:GO:0009733	P:response to auxin
HSK10548_c0_g1_i1	hypothetical protein CUMW_145210, partial	1067	20	0	70.13						mobidb-lite (MOBIDB_LITE); PTHR36388 (PANTHER)	no GO terms	no GO terms
HSK10549_c0_g1_i1	coiled-coil domain-containing protein 124-like	1151	20	1.98418e-85	95.25						no IPS match	no IPS match	no IPS match
HSK1055_c0_g1_i1	WAT1-related protein At3g02690, chloroplastic	479	20	1.80448e-110	85.5	1	C:GO:0016021	C:integral component of membrane			IPR000620 (PFAM); PTHR22911 (PANTHER); PTHR22911:SF60 (PANTHER)	C:GO:0016020; C:GO:0016021	C:membrane; C:integral component of membrane
HSK10550_c0_g1_i1	60S ribosomal protein L32-1	644	20	1.92879e-80	98.06	4	F:GO:0003735; C:GO:0005840; P:GO:0006412; P:GO:0042254	F:structural constituent of ribosome; C:ribosome; P:translation; P:ribosome biogenesis			IPR001515 (PFAM); IPR001515 (PANTHER); IPR001515 (PRODOM); IPR001515 (CDD); IPR036351 (SUPERFAMILY)	F:GO:0003735; C:GO:0005622; C:GO:0005840; P:GO:0006412	F:structural constituent of ribosome; C:intracellular; C:ribosome; P:translation
HSK10550_c0_g1_i2	60S ribosomal protein L32-1	241	20	1.91951e-22	97.83	4	F:GO:0003735; C:GO:0005840; P:GO:0006412; P:GO:0042254	F:structural constituent of ribosome; C:ribosome; P:translation; P:ribosome biogenesis			no IPS match	no IPS match	no IPS match
HSK10551_c0_g1_i1	proteasome subunit alpha type-7	1144	20	1.70137e-168	98.3	5	F:GO:0004298; C:GO:0005634; C:GO:0005737; P:GO:0006511; C:GO:0019773	F:threonine-type endopeptidase activity; C:nucleus; C:cytoplasm; P:ubiquitin-dependent protein catabolic process; C:proteasome core complex, alpha-subunit complex	EC:3.4.25	Acting on peptide bonds (peptidases)	IPR001353 (PFAM); IPR029055 (G3DSA:3.60.20.GENE3D); IPR000426 (PFAM); mobidb-lite (MOBIDB_LITE); PTHR11599 (PANTHER); PTHR11599:SF106 (PANTHER); IPR023332 (PROSITE_PROFILES); cd03755 (CDD); IPR029055 (SUPERFAMILY)	F:GO:0004175; F:GO:0004298; C:GO:0005839; P:GO:0006511; C:GO:0019773; P:GO:0051603	F:endopeptidase activity; F:threonine-type endopeptidase activity; C:proteasome core complex; P:ubiquitin-dependent protein catabolic process; C:proteasome core complex, alpha-subunit complex; P:proteolysis involved in cellular protein catabolic process
HSK10551_c0_g1_i2	proteasome subunit alpha type-7	601	20	1.10527e-12	85.09	5	F:GO:0004298; C:GO:0005634; C:GO:0005737; P:GO:0006511; C:GO:0019773	F:threonine-type endopeptidase activity; C:nucleus; C:cytoplasm; P:ubiquitin-dependent protein catabolic process; C:proteasome core complex, alpha-subunit complex	EC:3.4.25	Acting on peptide bonds (peptidases)	no IPS match	no IPS match	no IPS match
HSK10551_c0_g1_i3	proteasome subunit alpha type-7	812	20	2.42003e-144	98.08	5	F:GO:0004298; C:GO:0005634; C:GO:0005737; P:GO:0006511; C:GO:0019773	F:threonine-type endopeptidase activity; C:nucleus; C:cytoplasm; P:ubiquitin-dependent protein catabolic process; C:proteasome core complex, alpha-subunit complex	EC:3.4.25	Acting on peptide bonds (peptidases)	IPR029055 (G3DSA:3.60.20.GENE3D); IPR000426 (PFAM); IPR001353 (PFAM); mobidb-lite (MOBIDB_LITE); PTHR11599:SF106 (PANTHER); PTHR11599 (PANTHER); IPR023332 (PROSITE_PROFILES); cd03755 (CDD); IPR029055 (SUPERFAMILY)	F:GO:0004175; F:GO:0004298; C:GO:0005839; P:GO:0006511; C:GO:0019773; P:GO:0051603	F:endopeptidase activity; F:threonine-type endopeptidase activity; C:proteasome core complex; P:ubiquitin-dependent protein catabolic process; C:proteasome core complex, alpha-subunit complex; P:proteolysis involved in cellular protein catabolic process
HSK10551_c0_g2_i1	---NA---	654									no IPS match	no IPS match	no IPS match
HSK10552_c0_g1_i1	calcium-dependent protein kinase 11-like	599	20	6.08683e-78	94.6	5	F:GO:0004683; F:GO:0005509; F:GO:0005524; P:GO:0006468; P:GO:0009069	F:calmodulin-dependent protein kinase activity; F:calcium ion binding; F:ATP binding; P:protein phosphorylation; P:serine family amino acid metabolic process	EC:2.7.11; EC:2.7.11.17	Transferring phosphorus-containing groups; Calcium/calmodulin-dependent protein kinase	G3DSA:1.10.510.10 (GENE3D); G3DSA:3.30.200.20 (GENE3D); IPR000719 (PFAM); PTHR24349:SF192 (PANTHER); PTHR24349 (PANTHER); IPR000719 (PROSITE_PROFILES); IPR011009 (SUPERFAMILY)	F:GO:0004672; F:GO:0005524; P:GO:0006468	F:protein kinase activity; F:ATP binding; P:protein phosphorylation
HSK10552_c0_g1_i2	calcium-dependent protein kinase 11-like	507	20	1.62558e-55	93.95	15	F:GO:0004683; F:GO:0005509; F:GO:0005516; F:GO:0005524; C:GO:0005634; C:GO:0005829; C:GO:0005886; P:GO:0009069; P:GO:0009789; F:GO:0009931; P:GO:0018105; P:GO:0035556; P:GO:0046777; P:GO:0080092; P:GO:1901979	F:calmodulin-dependent protein kinase activity; F:calcium ion binding; F:calmodulin binding; F:ATP binding; C:nucleus; C:cytosol; C:plasma membrane; P:serine family amino acid metabolic process; P:positive regulation of abscisic acid-activated signaling pathway; F:calcium-dependent protein serine/threonine kinase activity; P:peptidyl-serine phosphorylation; P:intracellular signal transduction; P:…	EC:2.7.11; EC:2.7.11.17	Transferring phosphorus-containing groups; Calcium/calmodulin-dependent protein kinase	IPR000719 (PFAM); G3DSA:3.30.200.20 (GENE3D); PTHR24349 (PANTHER); PTHR24349:SF192 (PANTHER); IPR000719 (PROSITE_PROFILES); IPR011009 (SUPERFAMILY)	F:GO:0004672; F:GO:0005524; P:GO:0006468	F:protein kinase activity; F:ATP binding; P:protein phosphorylation
HSK10553_c0_g1_i1	GATA transcription factor 19-like isoform X1	1791	20	2.4123e-152	88.72	8	F:GO:0003700; F:GO:0005515; C:GO:0005634; C:GO:0005667; P:GO:0006355; P:GO:0006355; F:GO:0008270; F:GO:0043565	F:DNA binding transcription factor activity; F:protein binding; C:nucleus; C:transcription factor complex; P:regulation of transcription, DNA-templated; P:regulation of transcription, DNA-templated; F:zinc ion binding; F:sequence-specific DNA binding			IPR000679 (PFAM); IPR013088 (G3DSA:3.30.50.GENE3D); IPR010399 (PFAM); IPR010402 (PFAM); mobidb-lite (MOBIDB_LITE); PTHR10071:SF235 (PANTHER); PTHR10071 (PANTHER); IPR010402 (PROSITE_PROFILES); IPR010399 (PROSITE_PROFILES); cd00202 (CDD); SSF57716 (SUPERFAMILY)	F:GO:0003700; F:GO:0005515; P:GO:0006355; F:GO:0008270; F:GO:0043565	F:DNA binding transcription factor activity; F:protein binding; P:regulation of transcription, DNA-templated; F:zinc ion binding; F:sequence-specific DNA binding
HSK10553_c0_g1_i2	GATA transcription factor 19-like isoform X1	1181	20	1.01997e-131	84.43	7	F:GO:0003700; C:GO:0005634; C:GO:0005667; P:GO:0006355; P:GO:0006355; F:GO:0008270; F:GO:0043565	F:DNA binding transcription factor activity; C:nucleus; C:transcription factor complex; P:regulation of transcription, DNA-templated; P:regulation of transcription, DNA-templated; F:zinc ion binding; F:sequence-specific DNA binding			IPR000679 (PFAM); IPR013088 (G3DSA:3.30.50.GENE3D); mobidb-lite (MOBIDB_LITE); mobidb-lite (MOBIDB_LITE); PTHR10071 (PANTHER); PTHR10071:SF235 (PANTHER); cd00202 (CDD); SSF57716 (SUPERFAMILY)	F:GO:0003700; P:GO:0006355; F:GO:0008270; F:GO:0043565	F:DNA binding transcription factor activity; P:regulation of transcription, DNA-templated; F:zinc ion binding; F:sequence-specific DNA binding
HSK10553_c0_g1_i3	GATA transcription factor 19-like isoform X1	1378	20	2.57942e-80	87.96	7	F:GO:0003700; C:GO:0005634; C:GO:0005667; P:GO:0006355; P:GO:0006355; F:GO:0008270; F:GO:0043565	F:DNA binding transcription factor activity; C:nucleus; C:transcription factor complex; P:regulation of transcription, DNA-templated; P:regulation of transcription, DNA-templated; F:zinc ion binding; F:sequence-specific DNA binding			mobidb-lite (MOBIDB_LITE); mobidb-lite (MOBIDB_LITE); PTHR10071 (PANTHER); PTHR10071:SF235 (PANTHER)	no GO terms	no GO terms
HSK10553_c0_g1_i4	GATA transcription factor 19-like isoform X1	797	20	2.14706e-96	88.3	8	F:GO:0003700; F:GO:0005515; C:GO:0005634; C:GO:0005667; P:GO:0006355; P:GO:0006355; F:GO:0008270; F:GO:0043565	F:DNA binding transcription factor activity; F:protein binding; C:nucleus; C:transcription factor complex; P:regulation of transcription, DNA-templated; P:regulation of transcription, DNA-templated; F:zinc ion binding; F:sequence-specific DNA binding			IPR010402 (PFAM); IPR010399 (PFAM); mobidb-lite (MOBIDB_LITE); PTHR10071:SF218 (PANTHER); PTHR10071 (PANTHER); IPR010399 (PROSITE_PROFILES); IPR010402 (PROSITE_PROFILES)	F:GO:0005515	F:protein binding
HSK10553_c0_g1_i5	GATA transcription factor 19-like isoform X1	1594	20	0	88.41	8	F:GO:0003700; F:GO:0005515; C:GO:0005634; C:GO:0005667; P:GO:0006355; P:GO:0006355; F:GO:0008270; F:GO:0043565	F:DNA binding transcription factor activity; F:protein binding; C:nucleus; C:transcription factor complex; P:regulation of transcription, DNA-templated; P:regulation of transcription, DNA-templated; F:zinc ion binding; F:sequence-specific DNA binding			IPR000679 (PFAM); IPR010402 (PFAM); IPR010399 (PFAM); IPR013088 (G3DSA:3.30.50.GENE3D); mobidb-lite (MOBIDB_LITE); mobidb-lite (MOBIDB_LITE); mobidb-lite (MOBIDB_LITE); PTHR10071 (PANTHER); PTHR10071:SF235 (PANTHER); IPR010402 (PROSITE_PROFILES); IPR010399 (PROSITE_PROFILES); cd00202 (CDD); SSF57716 (SUPERFAMILY)	F:GO:0003700; F:GO:0005515; P:GO:0006355; F:GO:0008270; F:GO:0043565	F:DNA binding transcription factor activity; F:protein binding; P:regulation of transcription, DNA-templated; F:zinc ion binding; F:sequence-specific DNA binding
HSK10553_c0_g1_i6	GATA transcription factor 19-like isoform X2	1112	20	3.9264e-114	76.82	7	F:GO:0003700; C:GO:0005634; C:GO:0005667; P:GO:0006355; P:GO:0006355; F:GO:0008270; F:GO:0043565	F:DNA binding transcription factor activity; C:nucleus; C:transcription factor complex; P:regulation of transcription, DNA-templated; P:regulation of transcription, DNA-templated; F:zinc ion binding; F:sequence-specific DNA binding			IPR013088 (G3DSA:3.30.50.GENE3D); IPR000679 (PFAM); mobidb-lite (MOBIDB_LITE); PTHR10071:SF235 (PANTHER); PTHR10071 (PANTHER); PTHR10071:SF235 (PANTHER); PTHR10071 (PANTHER); cd00202 (CDD); SSF57716 (SUPERFAMILY)	F:GO:0003700; P:GO:0006355; F:GO:0008270; F:GO:0043565	F:DNA binding transcription factor activity; P:regulation of transcription, DNA-templated; F:zinc ion binding; F:sequence-specific DNA binding
HSK10553_c0_g1_i7	GATA transcription factor 19-like isoform X1	1525	20	0	85.33	8	F:GO:0003700; F:GO:0005515; C:GO:0005634; C:GO:0005667; P:GO:0006355; P:GO:0006355; F:GO:0008270; F:GO:0043565	F:DNA binding transcription factor activity; F:protein binding; C:nucleus; C:transcription factor complex; P:regulation of transcription, DNA-templated; P:regulation of transcription, DNA-templated; F:zinc ion binding; F:sequence-specific DNA binding			IPR010402 (PFAM); IPR010399 (PFAM); IPR013088 (G3DSA:3.30.50.GENE3D); IPR000679 (PFAM); mobidb-lite (MOBIDB_LITE); mobidb-lite (MOBIDB_LITE); PTHR10071:SF235 (PANTHER); PTHR10071 (PANTHER); PTHR10071 (PANTHER); IPR010402 (PROSITE_PROFILES); IPR010399 (PROSITE_PROFILES); cd00202 (CDD); SSF57716 (SUPERFAMILY)	F:GO:0003700; F:GO:0005515; P:GO:0006355; F:GO:0008270; F:GO:0043565	F:DNA binding transcription factor activity; F:protein binding; P:regulation of transcription, DNA-templated; F:zinc ion binding; F:sequence-specific DNA binding
HSK10554_c0_g1_i1	splicing factor 3B subunit 6-like protein	654	20	7.42687e-74	96.93	1	F:GO:0003723	F:RNA binding			IPR000504 (PFAM); IPR012677 (G3DSA:3.30.70.GENE3D); PTHR12785 (PANTHER); IPR034150 (PTHR12785:PANTHER); IPR000504 (PROSITE_PROFILES); IPR034150 (CDD); IPR035979 (SUPERFAMILY)	F:GO:0003676	F:nucleic acid binding
HSK10555_c0_g1_i1	ankyrin-1	961	20	1.56194e-164	90.49	1	F:GO:0005515	F:protein binding			IPR011990 (G3DSA:1.25.40.GENE3D); IPR036770 (G3DSA:1.25.40.GENE3D); IPR019734 (PFAM); IPR020683 (PFAM); mobidb-lite (MOBIDB_LITE); PTHR22904:SF394 (PANTHER); PTHR22904 (PANTHER); IPR013026 (PROSITE_PROFILES); IPR020683 (PROSITE_PROFILES); IPR002110 (PROSITE_PROFILES); IPR019734 (PROSITE_PROFILES); IPR019734 (PROSITE_PROFILES); IPR020683 (CDD); IPR011990 (SUPERFAMILY); IPR036770 (SUPERFAMILY)	F:GO:0005515	F:protein binding
HSK10556_c0_g1_i1	glutaredoxin-C6	745	20	4.01891e-95	80.87	6	C:GO:0005737; P:GO:0006118; F:GO:0009055; F:GO:0015035; P:GO:0022900; P:GO:0045454	C:cytoplasm; P:obsolete electron transport; F:electron transfer activity; F:protein disulfide oxidoreductase activity; P:electron transport chain; P:cell redox homeostasis			IPR011905 (TIGRFAM); G3DSA:3.40.30.10 (GENE3D); IPR002109 (PFAM); PTHR10168:SF56 (PANTHER); PTHR10168 (PANTHER); IPR002109 (PROSITE_PROFILES); cd03419 (CDD); IPR036249 (SUPERFAMILY)	F:GO:0009055; F:GO:0015035; P:GO:0045454	F:electron transfer activity; F:protein disulfide oxidoreductase activity; P:cell redox homeostasis
HSK10557_c0_g1_i1	cytochrome P450 77A4-like	1637	20	0	92.85	6	F:GO:0004497; F:GO:0005506; C:GO:0016021; F:GO:0016705; F:GO:0020037; P:GO:0055114	F:monooxygenase activity; F:iron ion binding; C:integral component of membrane; F:oxidoreductase activity, acting on paired donors, with incorporation or reduction of molecular oxygen; F:heme binding; P:oxidation-reduction process			IPR001128 (PRINTS); IPR002401 (PRINTS); IPR036396 (G3DSA:1.10.630.GENE3D); IPR001128 (PFAM); PTHR24298 (PANTHER); PTHR24298:SF54 (PANTHER); IPR036396 (SUPERFAMILY)	F:GO:0005506; F:GO:0016705; F:GO:0020037; P:GO:0055114	F:iron ion binding; F:oxidoreductase activity, acting on paired donors, with incorporation or reduction of molecular oxygen; F:heme binding; P:oxidation-reduction process
HSK10558_c0_g1_i1	outer envelope pore protein 24A, chloroplastic-like isoform X2	925	20	1.22129e-152	74.26	3	F:GO:0022843; P:GO:0034765; P:GO:0098655	F:voltage-gated cation channel activity; P:regulation of ion transmembrane transport; P:cation transmembrane transport			IPR034626 (PANTHER)	F:GO:0022843; P:GO:0034765	F:voltage-gated cation channel activity; P:regulation of ion transmembrane transport
HSK10559_c0_g1_i1	---NA---	485									no IPS match	no IPS match	no IPS match
HSK10559_c0_g2_i1	hypothetical protein CISIN_1g033622mg	607	20	1.51112e-39	85.65						mobidb-lite (MOBIDB_LITE); PTHR36320 (PANTHER)	no GO terms	no GO terms
HSK1056_c0_g1_i1	---NA---	526									no IPS match	no IPS match	no IPS match
HSK10560_c0_g1_i1	zinc finger CCCH domain-containing protein 18-like	649	20	3.1481e-78	81.27	2	F:GO:0003723; F:GO:0046872	F:RNA binding; F:metal ion binding			PTHR24009:SF0 (PANTHER); PTHR24009 (PANTHER)	no GO terms	no GO terms
HSK10560_c0_g1_i2	zinc finger CCCH domain-containing protein 18-like	2101	20	0	87.8	2	F:GO:0003723; F:GO:0046872	F:RNA binding; F:metal ion binding			G3DSA:4.10.1000.10 (GENE3D); IPR000504 (PFAM); IPR012677 (G3DSA:3.30.70.GENE3D); IPR000571 (PFAM); IPR025605 (PFAM); PTHR24009 (PANTHER); PTHR24009:SF0 (PANTHER); IPR025605 (PROSITE_PROFILES); IPR000571 (PROSITE_PROFILES); IPR000504 (PROSITE_PROFILES); IPR034365 (CDD); IPR035979 (SUPERFAMILY); IPR036855 (SUPERFAMILY)	F:GO:0003676; F:GO:0046872	F:nucleic acid binding; F:metal ion binding
HSK10561_c0_g1_i1	mannan endo-1,4-beta-mannosidase 7	1835	20	0	93.15	2	F:GO:0004553; P:GO:0005975	F:hydrolase activity, hydrolyzing O-glycosyl compounds; P:carbohydrate metabolic process			IPR001547 (PFAM); G3DSA:3.20.20.80 (GENE3D); mobidb-lite (MOBIDB_LITE); PTHR31451:SF18 (PANTHER); PTHR31451 (PANTHER); IPR017853 (SUPERFAMILY)	F:GO:0004553; P:GO:0005975	F:hydrolase activity, hydrolyzing O-glycosyl compounds; P:carbohydrate metabolic process
HSK10562_c0_g1_i1	rRNA biogenesis protein RRP5 isoform X2	1213	20	0	93.65	3	F:GO:0003676; C:GO:0005634; P:GO:0006397	F:nucleic acid binding; C:nucleus; P:mRNA processing			G3DSA:2.40.50.140 (GENE3D); G3DSA:2.40.50.140 (GENE3D); mobidb-lite (MOBIDB_LITE); PTHR23270 (PANTHER); PTHR23270:SF11 (PANTHER); IPR003029 (PROSITE_PROFILES); IPR003029 (PROSITE_PROFILES); IPR003029 (PROSITE_PROFILES); cd05694 (CDD); IPR012340 (SUPERFAMILY); IPR012340 (SUPERFAMILY); IPR012340 (SUPERFAMILY)	F:GO:0003676	F:nucleic acid binding
HSK10563_c0_g1_i1	probable transcription factor At3g04930	1176	20	3.7261e-147	72.24	1	P:GO:0006355	P:regulation of transcription, DNA-templated			IPR007592 (PFAM); mobidb-lite (MOBIDB_LITE); mobidb-lite (MOBIDB_LITE); mobidb-lite (MOBIDB_LITE); PTHR31662 (PANTHER); PTHR31662:SF6 (PANTHER)	P:GO:0006355	P:regulation of transcription, DNA-templated
HSK10564_c0_g1_i1	rRNA biogenesis protein RRP5	594	20	9.7997e-43	96.53	4	F:GO:0003676; F:GO:0005515; C:GO:0005634; P:GO:0006397	F:nucleic acid binding; F:protein binding; C:nucleus; P:mRNA processing			IPR008847 (PFAM); IPR011990 (G3DSA:1.25.40.GENE3D); PTHR23270:SF11 (PANTHER); PTHR23270 (PANTHER); IPR011990 (SUPERFAMILY)	F:GO:0005515; C:GO:0005634; P:GO:0006397	F:protein binding; C:nucleus; P:mRNA processing
HSK10564_c0_g2_i1	rRNA biogenesis protein RRP5 isoform X3	1298	20	0	91.24	7	P:GO:0000462; P:GO:0000466; F:GO:0003723; F:GO:0005515; C:GO:0005730; P:GO:0006397; C:GO:0032040	P:maturation of SSU-rRNA from tricistronic rRNA transcript (SSU-rRNA, 5.8S rRNA, LSU-rRNA); P:maturation of 5.8S rRNA from tricistronic rRNA transcript (SSU-rRNA, 5.8S rRNA, LSU-rRNA); F:RNA binding; F:protein binding; C:nucleolus; P:mRNA processing; C:small-subunit processome			IPR011990 (G3DSA:1.25.40.GENE3D); IPR003029 (PFAM); G3DSA:2.40.50.140 (GENE3D); mobidb-lite (MOBIDB_LITE); PTHR23270:SF11 (PANTHER); PTHR23270 (PANTHER); IPR003029 (PROSITE_PROFILES); IPR003029 (PROSITE_PROFILES); cd05708 (CDD); IPR011990 (SUPERFAMILY); IPR012340 (SUPERFAMILY); IPR011990 (SUPERFAMILY)	F:GO:0003676; F:GO:0005515	F:nucleic acid binding; F:protein binding
HSK10565_c0_g1_i1	zinc finger CCCH domain-containing protein 3 isoform X1	753	20	5.77135e-130	78.03	3	F:GO:0003676; C:GO:0005689; F:GO:0008270	F:nucleic acid binding; C:U12-type spliceosomal complex; F:zinc ion binding			IPR000571 (PFAM); IPR013085 (PFAM); G3DSA:4.10.1000.10 (GENE3D); G3DSA:3.30.160.60 (GENE3D); PTHR16465 (PANTHER); IPR000571 (PROSITE_PROFILES); IPR036236 (SUPERFAMILY); IPR036855 (SUPERFAMILY)	F:GO:0008270; F:GO:0046872	F:zinc ion binding; F:metal ion binding
HSK10566_c0_g1_i1	---NA---	796									no IPS match	no IPS match	no IPS match
HSK10567_c0_g1_i1	---NA---	273									no IPS match	no IPS match	no IPS match
HSK10567_c0_g2_i1	hypothetical protein CUMW_262890	848	1	5.37731e-10	86.49	6	P:GO:0006118; F:GO:0009055; C:GO:0009507; P:GO:0022900; F:GO:0046872; F:GO:0051537	P:obsolete electron transport; F:electron transfer activity; C:chloroplast; P:electron transport chain; F:metal ion binding; F:2 iron, 2 sulfur cluster binding			no IPS match	no IPS match	no IPS match
HSK10567_c0_g2_i2	hypothetical protein CUMW_262890	830	1	5.0308e-10	86.49	6	P:GO:0006118; F:GO:0009055; C:GO:0009507; P:GO:0022900; F:GO:0046872; F:GO:0051537	P:obsolete electron transport; F:electron transfer activity; C:chloroplast; P:electron transport chain; F:metal ion binding; F:2 iron, 2 sulfur cluster binding			no IPS match	no IPS match	no IPS match
HSK10568_c0_g1_i1	NAC domain-containing protein 83-like	606	20	1.98016e-58	72.8	3	F:GO:0003677; C:GO:0005634; P:GO:0006355	F:DNA binding; C:nucleus; P:regulation of transcription, DNA-templated			no IPS match	no IPS match	no IPS match
HSK10568_c0_g1_i2	NAC domain-containing protein 83-like	1019	20	0	77.09	3	F:GO:0003677; C:GO:0005634; P:GO:0006355	F:DNA binding; C:nucleus; P:regulation of transcription, DNA-templated			IPR003441 (PFAM); IPR036093 (G3DSA:3.30.310.GENE3D); mobidb-lite (MOBIDB_LITE); PTHR31989 (PANTHER); PTHR31989:SF20 (PANTHER); IPR003441 (PROSITE_PROFILES); IPR036093 (SUPERFAMILY)	F:GO:0003677; P:GO:0006355	F:DNA binding; P:regulation of transcription, DNA-templated
HSK10569_c0_g1_i1	levodione reductase-like	1368	20	5.76002e-116	85.45						G3DSA:3.40.50.720 (GENE3D); IPR002347 (PFAM); PTHR44375 (PANTHER); cd05233 (CDD); IPR036291 (SUPERFAMILY)	no GO terms	no GO terms
HSK10569_c0_g1_i2	3-oxoacyl-[acyl-carrier-protein] reductase FabG	1193	20	0	90.78						IPR002347 (PRINTS); PF13561 (PFAM); G3DSA:3.40.50.720 (GENE3D); PTHR44375 (PANTHER); cd05233 (CDD); IPR036291 (SUPERFAMILY)	no GO terms	no GO terms
HSK10569_c0_g1_i3	3-oxoacyl-[acyl-carrier-protein] reductase FabG	1292	20	0	90.81						IPR002347 (PRINTS); PF13561 (PFAM); G3DSA:3.40.50.720 (GENE3D); PTHR44375 (PANTHER); cd05233 (CDD); IPR036291 (SUPERFAMILY)	no GO terms	no GO terms
HSK10570_c0_g1_i1	Fanconi anemia group D2 protein homolog	608	20	2.31866e-61	88.84	5	C:GO:0000793; C:GO:0005634; P:GO:0006281; C:GO:0009507; F:GO:0070182	C:condensed chromosome; C:nucleus; P:DNA repair; C:chloroplast; F:DNA polymerase binding			IPR029448 (PFAM); PTHR32086 (PANTHER)	P:GO:0006281	P:DNA repair
HSK10570_c0_g1_i2	Fanconi anemia group D2 protein homolog	926	20	9.84064e-60	88.84	5	C:GO:0000793; C:GO:0005634; P:GO:0006281; C:GO:0009507; F:GO:0070182	C:condensed chromosome; C:nucleus; P:DNA repair; C:chloroplast; F:DNA polymerase binding			IPR029448 (PFAM); PTHR32086 (PANTHER)	P:GO:0006281	P:DNA repair
HSK10570_c0_g1_i3	Plant lipid transfer protein/Par allergen	830	20	1.37447e-60	57.74	2	P:GO:0006869; F:GO:0008289	P:lipid transport; F:lipid binding			G3DSA:1.10.110.10 (GENE3D); PTHR33076 (PANTHER); PTHR33076:SF40 (PANTHER); IPR036312 (SUPERFAMILY)	no GO terms	no GO terms
HSK10571_c0_g1_i1	Ubiquitin carboxyl-terminal hydrolase 15	1134	20	1.00426e-75	79.77	1	F:GO:0016787	F:hydrolase activity			PTHR33786:SF2 (PANTHER); PTHR33786 (PANTHER)	no GO terms	no GO terms
HSK10571_c0_g1_i2	hypothetical protein CICLE_v10013140mg	802	20	9.8428e-56	82.69						PTHR33786:SF2 (PANTHER); PTHR33786 (PANTHER)	no GO terms	no GO terms
HSK10572_c0_g1_i1	SAP domain-containing protein, putative isoform 1	841	20	1.61343e-106	86.56	1	C:GO:0016021	C:integral component of membrane			IPR018276 (PFAM); IPR036361 (G3DSA:1.10.720.GENE3D); IPR003034 (PFAM); mobidb-lite (MOBIDB_LITE); mobidb-lite (MOBIDB_LITE); mobidb-lite (MOBIDB_LITE); PTHR12381 (PANTHER); PTHR12381:SF58 (PANTHER); IPR003034 (PROSITE_PROFILES); IPR036361 (SUPERFAMILY)	no GO terms	no GO terms
HSK10572_c0_g1_i2	SAP domain-containing protein, putative isoform 1	731	20	3.43735e-86	86.2	1	C:GO:0016021	C:integral component of membrane			IPR018276 (PFAM); IPR036361 (G3DSA:1.10.720.GENE3D); IPR003034 (PFAM); mobidb-lite (MOBIDB_LITE); PTHR12381:SF58 (PANTHER); PTHR12381 (PANTHER); IPR003034 (PROSITE_PROFILES); IPR036361 (SUPERFAMILY)	no GO terms	no GO terms
HSK10573_c0_g1_i1	tRNA ligase 1	463	20	1.46475e-94	71.36	3	F:GO:0003972; F:GO:0005524; P:GO:0006388	F:RNA ligase (ATP) activity; F:ATP binding; P:tRNA splicing, via endonucleolytic cleavage and ligation	EC:6.5.1.3	RNA ligase (ATP)	mobidb-lite (MOBIDB_LITE); mobidb-lite (MOBIDB_LITE)	no GO terms	no GO terms
HSK10573_c0_g2_i1	tRNA ligase 1 isoform X6	766	20	0	94.98	3	F:GO:0003972; F:GO:0005524; P:GO:0006388	F:RNA ligase (ATP) activity; F:ATP binding; P:tRNA splicing, via endonucleolytic cleavage and ligation	EC:6.5.1.3	RNA ligase (ATP)	PTHR35460 (PANTHER)	no GO terms	no GO terms
HSK10573_c0_g3_i1	translation elongation factor EF-1 alpha	441	20	5.70414e-106	96.36	17	F:GO:0003729; F:GO:0003972; F:GO:0004519; F:GO:0005524; C:GO:0005634; C:GO:0005737; C:GO:0005844; P:GO:0006388; P:GO:0006412; P:GO:0010069; P:GO:0010928; F:GO:0016301; P:GO:0016310; P:GO:0030968; P:GO:0042245; F:GO:0046872; P:GO:0090305	F:mRNA binding; F:RNA ligase (ATP) activity; F:endonuclease activity; F:ATP binding; C:nucleus; C:cytoplasm; C:polysome; P:tRNA splicing, via endonucleolytic cleavage and ligation; P:translation; P:zygote asymmetric cytokinesis in embryo sac; P:regulation of auxin mediated signaling pathway; F:kinase activity; P:phosphorylation; P:endoplasmic reticulum unfolded protein response; P:RNA repair; F:m…	EC:6.5.1.3	RNA ligase (ATP)	PTHR35460 (PANTHER)	no GO terms	no GO terms
HSK10573_c0_g4_i1	tRNA ligase 1 isoform X6	744	20	0	90.44	3	F:GO:0003972; F:GO:0005524; P:GO:0006388	F:RNA ligase (ATP) activity; F:ATP binding; P:tRNA splicing, via endonucleolytic cleavage and ligation	EC:6.5.1.3	RNA ligase (ATP)	mobidb-lite (MOBIDB_LITE); PTHR35460 (PANTHER)	no GO terms	no GO terms
HSK10574_c0_g1_i1	PREDICTED: uncharacterized protein LOC107176047	244	19	1.99398e-29	81.69						no IPS match	no IPS match	no IPS match
HSK10574_c0_g2_i1	PREDICTED: uncharacterized protein LOC107174959	251	20	2.60491e-49	79.37						no IPS match	no IPS match	no IPS match
HSK10574_c0_g3_i1	PREDICTED: uncharacterized protein LOC107177592	556	20	9.37084e-86	89.55						PTHR31973 (PANTHER)	no GO terms	no GO terms
HSK10574_c0_g4_i1	PREDICTED: uncharacterized protein LOC107175615	296	16	1.00737e-43	93.11	2	C:GO:0005743; P:GO:0006850	C:mitochondrial inner membrane; P:mitochondrial pyruvate transmembrane transport			no IPS match	no IPS match	no IPS match
HSK10575_c0_g1_i1	peptidyl-prolyl cis-trans isomerase FKBP12	422	20	5.66313e-52	94.77	3	P:GO:0000413; F:GO:0003755; C:GO:0005829	P:protein peptidyl-prolyl isomerization; F:peptidyl-prolyl cis-trans isomerase activity; C:cytosol	EC:5.2.1.8	Peptidylprolyl isomerase	no IPS match	no IPS match	no IPS match
HSK10575_c0_g1_i2	peptidyl-prolyl cis-trans isomerase FKBP12	619	20	5.75431e-76	93.62	5	P:GO:0000413; F:GO:0003755; F:GO:0005528; C:GO:0005829; P:GO:0061077	P:protein peptidyl-prolyl isomerization; F:peptidyl-prolyl cis-trans isomerase activity; F:FK506 binding; C:cytosol; P:chaperone-mediated protein folding	EC:5.2.1.8	Peptidylprolyl isomerase	no IPS match	no IPS match	no IPS match
HSK10576_c0_g1_i1	apoptosis-inducing factor 2-like	1363	20	0	85.46	3	C:GO:0016021; F:GO:0016491; P:GO:0055114	C:integral component of membrane; F:oxidoreductase activity; P:oxidation-reduction process			PR00368 (PRINTS); IPR023753 (PFAM); G3DSA:3.50.50.100 (GENE3D); PTHR43735 (PANTHER); PTHR43735:SF4 (PANTHER); IPR036188 (SUPERFAMILY)	F:GO:0016491; P:GO:0055114	F:oxidoreductase activity; P:oxidation-reduction process
HSK10576_c0_g1_i2	apoptosis-inducing factor 2-like	1015	20	0	86.5	3	C:GO:0016021; F:GO:0016491; P:GO:0055114	C:integral component of membrane; F:oxidoreductase activity; P:oxidation-reduction process			PR00368 (PRINTS); IPR023753 (PFAM); G3DSA:3.50.50.100 (GENE3D); PTHR43735:SF4 (PANTHER); PTHR43735 (PANTHER); IPR036188 (SUPERFAMILY)	F:GO:0016491; P:GO:0055114	F:oxidoreductase activity; P:oxidation-reduction process
HSK10577_c0_g1_i1	hypothetical protein CICLE_v10026467mg	879	20	2.3247e-149	67.39	1	C:GO:0016021	C:integral component of membrane			PTHR33868:SF3 (PANTHER); PTHR33868 (PANTHER)	no GO terms	no GO terms
HSK10578_c0_g1_i1	sm-like protein LSM2	590	20	2.21633e-61	99.79	9	P:GO:0000398; C:GO:0000932; F:GO:0003723; C:GO:0005688; C:GO:0005829; C:GO:0046540; C:GO:0071011; C:GO:0071013; C:GO:1990726	P:mRNA splicing, via spliceosome; C:P-body; F:RNA binding; C:U6 snRNP; C:cytosol; C:U4/U6 x U5 tri-snRNP complex; C:precatalytic spliceosome; C:catalytic step 2 spliceosome; C:Lsm1-7-Pat1 complex			IPR001163 (PFAM); G3DSA:2.30.30.100 (GENE3D); IPR016654 (PIRSF); IPR016654 (PANTHER); IPR016654 (CDD); IPR010920 (SUPERFAMILY)	P:GO:0006397	P:mRNA processing
HSK10579_c0_g1_i1	uncharacterized CRM domain-containing protein At3g25440, chloroplastic	897	20	0	90.31	1	F:GO:0003723	F:RNA binding			IPR035920 (G3DSA:3.30.110.GENE3D); IPR001890 (PFAM); mobidb-lite (MOBIDB_LITE); PTHR31426 (PANTHER); PTHR31426:SF2 (PANTHER); IPR001890 (PROSITE_PROFILES); IPR035920 (SUPERFAMILY)	F:GO:0003723	F:RNA binding
HSK10579_c0_g2_i1	uncharacterized CRM domain-containing protein At3g25440, chloroplastic	490	20	3.17108e-41	84.25	1	F:GO:0003723	F:RNA binding			mobidb-lite (MOBIDB_LITE); PTHR31426:SF2 (PANTHER); PTHR31426 (PANTHER)	no GO terms	no GO terms
HSK10579_c0_g2_i2	uncharacterized CRM domain-containing protein At3g25440, chloroplastic	503	20	4.22493e-56	79.71	1	F:GO:0003723	F:RNA binding			mobidb-lite (MOBIDB_LITE); PTHR31426 (PANTHER); PTHR31426:SF2 (PANTHER)	no GO terms	no GO terms
HSK1058_c0_g1_i1	pentatricopeptide repeat-containing protein At5g15280	529	20	6.18457e-110	71.26	5	F:GO:0003723; F:GO:0004519; P:GO:0009451; C:GO:0043231; P:GO:0090305	F:RNA binding; F:endonuclease activity; P:RNA modification; C:intracellular membrane-bounded organelle; P:nucleic acid phosphodiester bond hydrolysis			PTHR24015 (PANTHER); PTHR24015:SF787 (PANTHER)	no GO terms	no GO terms
HSK10580_c0_g1_i1	---NA---	554									mobidb-lite (MOBIDB_LITE)	no GO terms	no GO terms
HSK10580_c0_g1_i2	---NA---	536									mobidb-lite (MOBIDB_LITE)	no GO terms	no GO terms
HSK10581_c0_g1_i1	sister chromatid cohesion 1 protein 2	3202	20	0	65.88	2	C:GO:0000228; F:GO:0005515	C:nuclear chromosome; F:protein binding			IPR023093 (G3DSA:1.10.10.GENE3D); IPR006909 (PFAM); IPR006910 (PFAM); mobidb-lite (MOBIDB_LITE); mobidb-lite (MOBIDB_LITE); PTHR12585:SF49 (PANTHER); PTHR12585 (PANTHER); IPR036390 (SUPERFAMILY)	C:GO:0000228; F:GO:0005515	C:nuclear chromosome; F:protein binding
HSK10581_c0_g1_i2	sister chromatid cohesion 1 protein 2	1671	20	0	62.26	1	C:GO:0000228	C:nuclear chromosome			mobidb-lite (MOBIDB_LITE); mobidb-lite (MOBIDB_LITE); PTHR12585:SF49 (PANTHER); PTHR12585 (PANTHER)	no GO terms	no GO terms
HSK10582_c0_g1_i1	---NA---	449									no IPS match	no IPS match	no IPS match
HSK10583_c0_g1_i1	nuclear nucleic acid-binding protein C1D	726	20	3.64229e-83	89.1						no IPS match	no IPS match	no IPS match
HSK10583_c0_g1_i2	nuclear nucleic acid-binding protein C1D	1018	20	1.22913e-169	89.15						mobidb-lite (MOBIDB_LITE); mobidb-lite (MOBIDB_LITE); IPR011082 (PANTHER)	no GO terms	no GO terms
HSK10584_c0_g1_i1	universal stress protein A-like protein	773	20	2.59534e-25	78.96	2	P:GO:0006950; F:GO:0016787	P:response to stress; F:hydrolase activity			IPR006016 (PFAM); IPR014729 (G3DSA:3.40.50.GENE3D); PTHR31964 (PANTHER); PTHR31964:SF6 (PANTHER); cd00293 (CDD); SSF52402 (SUPERFAMILY)	P:GO:0006950	P:response to stress
HSK10584_c0_g1_i2	universal stress protein A-like protein	835	20	2.83429e-98	85.77	2	P:GO:0006950; F:GO:0016787	P:response to stress; F:hydrolase activity			IPR006015 (PRINTS); IPR006016 (PFAM); IPR014729 (G3DSA:3.40.50.GENE3D); PTHR31964:SF6 (PANTHER); PTHR31964 (PANTHER); cd00293 (CDD); SSF52402 (SUPERFAMILY)	P:GO:0006950	P:response to stress
HSK10584_c0_g1_i3	universal stress protein A-like protein	1131	20	3.13568e-56	89.72	2	P:GO:0006950; F:GO:0016787	P:response to stress; F:hydrolase activity			IPR006015 (PRINTS); IPR006016 (PFAM); IPR014729 (G3DSA:3.40.50.GENE3D); PTHR31964 (PANTHER); PTHR31964:SF6 (PANTHER); cd00293 (CDD); SSF52402 (SUPERFAMILY)	P:GO:0006950	P:response to stress
HSK10584_c0_g1_i4	universal stress protein A-like protein	636	20	1.27399e-45	80.39	2	P:GO:0006950; F:GO:0016787	P:response to stress; F:hydrolase activity			IPR006016 (PFAM); IPR014729 (G3DSA:3.40.50.GENE3D); PTHR31964:SF6 (PANTHER); PTHR31964 (PANTHER); cd00293 (CDD); SSF52402 (SUPERFAMILY)	P:GO:0006950	P:response to stress
HSK10585_c0_g1_i1	putative disease resistance protein At3g14460	1045	20	8.63343e-49	72.33	1	F:GO:0043531	F:ADP binding			no IPS match	no IPS match	no IPS match
HSK10586_c0_g1_i1	TLC domain-containing protein At5g14285-like	991	20	3.22981e-153	85.34	2	F:GO:0003677; C:GO:0016021	F:DNA binding; C:integral component of membrane			PTHR31766 (PANTHER); IPR006634 (PROSITE_PROFILES)	C:GO:0016021	C:integral component of membrane
HSK10586_c0_g1_i2	TLC domain-containing protein At5g14285-like	981	20	1.49972e-153	85.34	2	F:GO:0003677; C:GO:0016021	F:DNA binding; C:integral component of membrane			PTHR31766 (PANTHER); IPR006634 (PROSITE_PROFILES)	C:GO:0016021	C:integral component of membrane
HSK10586_c0_g1_i3	TLC domain-containing protein At5g14285-like	983	20	2.57959e-153	85.34	2	F:GO:0003677; C:GO:0016021	F:DNA binding; C:integral component of membrane			PTHR31766 (PANTHER); IPR006634 (PROSITE_PROFILES)	C:GO:0016021	C:integral component of membrane
HSK10586_c0_g1_i4	TLC domain-containing protein At5g14285-like	989	20	2.78568e-153	85.34	2	F:GO:0003677; C:GO:0016021	F:DNA binding; C:integral component of membrane			PTHR31766 (PANTHER); IPR006634 (PROSITE_PROFILES)	C:GO:0016021	C:integral component of membrane
HSK10587_c0_g1_i1	increased DNA methylation 1 isoform X1	633	20	3.96065e-116	83.02	4	F:GO:0003677; F:GO:0016740; P:GO:0043966; F:GO:0046872	F:DNA binding; F:transferase activity; P:histone H3 acetylation; F:metal ion binding			mobidb-lite (MOBIDB_LITE); PTHR42672 (PANTHER); IPR031086 (PTHR42672:PANTHER)	no GO terms	no GO terms
HSK10588_c0_g1_i1	F-box/kelch-repeat protein At1g51550	425	20	6.35102e-93	73.85	1	F:GO:0005515	F:protein binding			IPR015915 (G3DSA:2.120.10.GENE3D); G3DSA:1.20.1280.50 (GENE3D); IPR001810 (PFAM); PTHR23244 (PANTHER); PTHR23244:SF324 (PANTHER); IPR001810 (PROSITE_PROFILES); IPR036047 (SUPERFAMILY); IPR015915 (SUPERFAMILY)	F:GO:0005515	F:protein binding
HSK10588_c0_g1_i2	F-box/kelch-repeat protein At1g51550	503	20	1.02423e-117	85.22	2	F:GO:0005515; F:GO:0016874	F:protein binding; F:ligase activity			IPR015915 (G3DSA:2.120.10.GENE3D); G3DSA:1.20.1280.50 (GENE3D); PTHR23244 (PANTHER); PTHR23244:SF324 (PANTHER); IPR036047 (SUPERFAMILY); IPR015915 (SUPERFAMILY)	F:GO:0005515	F:protein binding
HSK10588_c0_g2_i1	---NA---	239									no IPS match	no IPS match	no IPS match
HSK10589_c0_g1_i1	RPM1-interacting protein 4-like	601	20	2.64627e-50	77.72						IPR008700 (PFAM); mobidb-lite (MOBIDB_LITE); PTHR33159:SF2 (PANTHER); PTHR33159 (PANTHER)	no GO terms	no GO terms
HSK10590_c0_g1_i1	21 kDa protein	797	20	6.5363e-144	78.37	2	F:GO:0004857; P:GO:0043086	F:enzyme inhibitor activity; P:negative regulation of catalytic activity			IPR006501 (PFAM); IPR035513 (G3DSA:1.20.140.GENE3D); IPR006501 (TIGRFAM); PTHR31080 (PANTHER); PTHR31080:SF30 (PANTHER); cd15798 (CDD); IPR035513 (SUPERFAMILY)	F:GO:0004857	F:enzyme inhibitor activity
HSK10590_c0_g1_i2	21 kDa protein	809	20	7.65124e-144	78.37	2	F:GO:0004857; P:GO:0043086	F:enzyme inhibitor activity; P:negative regulation of catalytic activity			IPR006501 (PFAM); IPR035513 (G3DSA:1.20.140.GENE3D); IPR006501 (TIGRFAM); PTHR31080 (PANTHER); PTHR31080:SF30 (PANTHER); cd15798 (CDD); IPR035513 (SUPERFAMILY)	F:GO:0004857	F:enzyme inhibitor activity
HSK10591_c0_g1_i1	transport membrane protein (mitochondrion)	822	20	2.61357e-159	92.57	6	F:GO:0009977; C:GO:0016021; C:GO:0031966; C:GO:0033281; P:GO:0043953; P:GO:0065002	F:proton motive force dependent protein transmembrane transporter activity; C:integral component of membrane; C:mitochondrial membrane; C:TAT protein transport complex; P:protein transport by the Tat complex; P:intracellular protein transmembrane transport			IPR002033 (TIGRFAM); IPR002033 (PFAM); PTHR30371:SF0 (PANTHER); IPR002033 (PANTHER)	C:GO:0016021	C:integral component of membrane
HSK10592_c0_g1_i1	hevein-like preproprotein	547	20	2.83088e-83	91.27	3	F:GO:0008061; P:GO:0042742; P:GO:0050832	F:chitin binding; P:defense response to bacterium; P:defense response to fungus			IPR001153 (PRINTS); IPR036908 (G3DSA:2.40.40.GENE3D); IPR001153 (PFAM); PTHR22595:SF71 (PANTHER); PTHR22595 (PANTHER); IPR001153 (PRODOM); IPR001153 (PROSITE_PROFILES); IPR036908 (SUPERFAMILY)	P:GO:0042742; P:GO:0050832	P:defense response to bacterium; P:defense response to fungus
HSK10593_c0_g1_i1	wall-associated receptor kinase 2-like	272	20	2.43033e-58	89.04	9	P:GO:0000186; F:GO:0004709; F:GO:0005509; F:GO:0005524; C:GO:0005622; P:GO:0007178; P:GO:0009069; C:GO:0016021; F:GO:0030247	P:activation of MAPKK activity; F:MAP kinase kinase kinase activity; F:calcium ion binding; F:ATP binding; C:intracellular; P:transmembrane receptor protein serine/threonine kinase signaling pathway; P:serine family amino acid metabolic process; C:integral component of membrane; F:polysaccharide binding	EC:2.7.11.25; EC:2.7.11	Mitogen-activated protein kinase kinase kinase; Transferring phosphorus-containing groups	PTHR27005 (PANTHER); PTHR27005:SF9 (PANTHER)	no GO terms	no GO terms
HSK10593_c0_g2_i1	wall-associated receptor kinase 2-like	1111	20	0	84.29	7	F:GO:0004674; F:GO:0005509; F:GO:0005524; P:GO:0006468; P:GO:0009069; C:GO:0016021; F:GO:0030247	F:protein serine/threonine kinase activity; F:calcium ion binding; F:ATP binding; P:protein phosphorylation; P:serine family amino acid metabolic process; C:integral component of membrane; F:polysaccharide binding	EC:2.7.11	Transferring phosphorus-containing groups	G3DSA:3.30.200.20 (GENE3D); IPR001245 (PFAM); G3DSA:1.10.510.10 (GENE3D); PIRSF000654 (PIRSF); PTHR27005:SF160 (PANTHER); PTHR27005 (PANTHER); IPR000719 (PROSITE_PROFILES); IPR011009 (SUPERFAMILY)	F:GO:0004672; F:GO:0005524; P:GO:0006468	F:protein kinase activity; F:ATP binding; P:protein phosphorylation
HSK10594_c0_g1_i1	phospholipase D alpha 1-like	398	20	8.42944e-87	87.63	6	F:GO:0004630; F:GO:0005509; P:GO:0009395; C:GO:0016020; P:GO:0046470; F:GO:0070290	F:phospholipase D activity; F:calcium ion binding; P:phospholipid catabolic process; C:membrane; P:phosphatidylcholine metabolic process; F:N-acylphosphatidylethanolamine-specific phospholipase D activity	EC:3.1.4.4	Phospholipase D	IPR001736 (PFAM); G3DSA:3.30.870.10 (GENE3D); IPR015679 (PANTHER); PTHR18896:SF89 (PANTHER); IPR001736 (PROSITE_PROFILES); SSF56024 (SUPERFAMILY)	F:GO:0003824	F:catalytic activity
HSK10594_c0_g2_i1	phospholipase D alpha 1	260	20	1.49109e-44	84.46	6	F:GO:0004630; F:GO:0005509; P:GO:0009395; C:GO:0016020; P:GO:0046470; F:GO:0070290	F:phospholipase D activity; F:calcium ion binding; P:phospholipid catabolic process; C:membrane; P:phosphatidylcholine metabolic process; F:N-acylphosphatidylethanolamine-specific phospholipase D activity	EC:3.1.4.4	Phospholipase D	IPR015679 (PANTHER); PTHR18896:SF59 (PANTHER)	no GO terms	no GO terms
HSK10595_c0_g1_i1	chloroplast photosystem II PsbW protein	589	20	8.24043e-64	82.6	4	C:GO:0009523; C:GO:0009535; C:GO:0016021; P:GO:0042549	C:photosystem II; C:chloroplast thylakoid membrane; C:integral component of membrane; P:photosystem II stabilization			IPR009806 (PFAM); IPR009806 (PANTHER)	C:GO:0009507; C:GO:0009523; P:GO:0015979	C:chloroplast; C:photosystem II; P:photosynthesis
HSK10596_c0_g1_i1	ankyrin repeat-containing protein At2g01680-like	373	20	2.70535e-32	82.26	1	C:GO:0016021	C:integral component of membrane			no IPS match	no IPS match	no IPS match
HSK10596_c0_g1_i2	ankyrin repeat-containing protein At2g01680-like	363	20	2.41346e-32	82.26	1	C:GO:0016021	C:integral component of membrane			no IPS match	no IPS match	no IPS match
HSK10596_c1_g1_i1	ankyrin repeat-containing protein At2g01680-like	386	20	3.64693e-67	78.54	1	C:GO:0016021	C:integral component of membrane			no IPS match	no IPS match	no IPS match
HSK10596_c1_g2_i1	ankyrin repeat-containing protein At2g01680-like	274	20	3.60161e-58	88.9	2	F:GO:0005515; C:GO:0016021	F:protein binding; C:integral component of membrane			IPR036770 (G3DSA:1.25.40.GENE3D); IPR020683 (PFAM); PTHR24177 (PANTHER); PTHR24177:SF115 (PANTHER); IPR020683 (PROSITE_PROFILES); IPR002110 (PROSITE_PROFILES); IPR020683 (CDD); IPR036770 (SUPERFAMILY)	F:GO:0005515	F:protein binding
HSK10597_c0_g1_i1	predicted protein	259	20	1.53152e-49	87.99	2	P:GO:0055114; F:GO:0070330	P:oxidation-reduction process; F:aromatase activity	EC:1.14.14.1; EC:1.14.14	Unspecific monooxygenase; Acting on paired donors, with incorporation or reduction of molecular oxygen. The oxygen incorporated need not be derived from O(2)	mobidb-lite (MOBIDB_LITE); PTHR34141 (PANTHER)	no GO terms	no GO terms
HSK10598_c0_g1_i1	---NA---	541									mobidb-lite (MOBIDB_LITE)	no GO terms	no GO terms
HSK10598_c0_g1_i2	---NA---	467									no IPS match	no IPS match	no IPS match
HSK10599_c0_g1_i1	cytochrome P450 71A1-like	504	20	3.47877e-70	94.88	6	F:GO:0004497; F:GO:0005506; C:GO:0016021; F:GO:0016705; F:GO:0020037; P:GO:0055114	F:monooxygenase activity; F:iron ion binding; C:integral component of membrane; F:oxidoreductase activity, acting on paired donors, with incorporation or reduction of molecular oxygen; F:heme binding; P:oxidation-reduction process			IPR036396 (G3DSA:1.10.630.GENE3D); IPR001128 (PFAM); PTHR24298:SF67 (PANTHER); PTHR24298 (PANTHER); IPR036396 (SUPERFAMILY)	F:GO:0005506; F:GO:0016705; F:GO:0020037; P:GO:0055114	F:iron ion binding; F:oxidoreductase activity, acting on paired donors, with incorporation or reduction of molecular oxygen; F:heme binding; P:oxidation-reduction process
HSK10599_c0_g2_i1	cytochrome P450 71A1-like	235	20	1.06852e-51	96.28	6	F:GO:0004497; F:GO:0005506; C:GO:0016021; F:GO:0016705; F:GO:0020037; P:GO:0055114	F:monooxygenase activity; F:iron ion binding; C:integral component of membrane; F:oxidoreductase activity, acting on paired donors, with incorporation or reduction of molecular oxygen; F:heme binding; P:oxidation-reduction process			IPR001128 (PFAM); IPR036396 (G3DSA:1.10.630.GENE3D); PTHR24298 (PANTHER); PTHR24298:SF67 (PANTHER); IPR036396 (SUPERFAMILY)	F:GO:0005506; F:GO:0016705; F:GO:0020037; P:GO:0055114	F:iron ion binding; F:oxidoreductase activity, acting on paired donors, with incorporation or reduction of molecular oxygen; F:heme binding; P:oxidation-reduction process
HSK10599_c0_g3_i1	cytochrome P450 71A1-like	262	20	1.44491e-55	95.68	6	F:GO:0004497; F:GO:0005506; C:GO:0016021; F:GO:0016705; F:GO:0020037; P:GO:0055114	F:monooxygenase activity; F:iron ion binding; C:integral component of membrane; F:oxidoreductase activity, acting on paired donors, with incorporation or reduction of molecular oxygen; F:heme binding; P:oxidation-reduction process			no IPS match	no IPS match	no IPS match
HSK106_c0_g1_i1	probable LRR receptor-like serine/threonine-protein kinase At4g26540	341	20	2.27165e-69	91.37	5	F:GO:0004674; F:GO:0005524; P:GO:0006468; P:GO:0009069; C:GO:0016021	F:protein serine/threonine kinase activity; F:ATP binding; P:protein phosphorylation; P:serine family amino acid metabolic process; C:integral component of membrane	EC:2.7.11	Transferring phosphorus-containing groups	IPR032675 (G3DSA:3.80.10.GENE3D); PTHR27000 (PANTHER); PTHR27000:SF186 (PANTHER); SSF52058 (SUPERFAMILY)	no GO terms	no GO terms
HSK1060_c0_g1_i1	hypothetical protein CUMW_249560	590	9	1.42676e-30	80.39						no IPS match	no IPS match	no IPS match
HSK10600_c0_g1_i1	disease resistance protein At4g27190-like	218	20	4.8685e-40	94.07	1	F:GO:0043531	F:ADP binding			no IPS match	no IPS match	no IPS match
HSK10600_c0_g2_i1	disease resistance protein At4g27190-like	373	20	6.3984e-74	79.33	1	F:GO:0043531	F:ADP binding			PTHR45142 (PANTHER)	no GO terms	no GO terms
HSK10602_c0_g1_i1	hypothetical protein CUMW_152390	486	20	1.25327e-42	87.27	1	C:GO:0016021	C:integral component of membrane			IPR027858 (PFAM); PTHR28492 (PANTHER)	no GO terms	no GO terms
HSK10603_c0_g1_i1	N-(5'-phosphoribosyl)anthranilate isomerase 1, chloroplastic	1186	20	0	81.96	4	P:GO:0000162; F:GO:0004640; P:GO:0006571; P:GO:0009094	P:tryptophan biosynthetic process; F:phosphoribosylanthranilate isomerase activity; P:tyrosine biosynthetic process; P:L-phenylalanine biosynthetic process	EC:5.3.1.24	Phosphoribosylanthranilate isomerase	IPR013785 (G3DSA:3.20.20.GENE3D); IPR001240 (PFAM); PTHR42894:SF2 (PANTHER); PTHR42894 (PANTHER); IPR001240 (HAMAP); IPR001240 (CDD); IPR011060 (SUPERFAMILY)	F:GO:0003824; F:GO:0004640; P:GO:0006568; P:GO:0008152	F:catalytic activity; F:phosphoribosylanthranilate isomerase activity; P:tryptophan metabolic process; P:metabolic process
HSK10603_c0_g1_i2	N-(5'-phosphoribosyl)anthranilate isomerase 1, chloroplastic	1071	20	0	81.96	4	P:GO:0000162; F:GO:0004640; P:GO:0006571; P:GO:0009094	P:tryptophan biosynthetic process; F:phosphoribosylanthranilate isomerase activity; P:tyrosine biosynthetic process; P:L-phenylalanine biosynthetic process	EC:5.3.1.24	Phosphoribosylanthranilate isomerase	IPR013785 (G3DSA:3.20.20.GENE3D); IPR001240 (PFAM); PTHR42894:SF2 (PANTHER); PTHR42894 (PANTHER); IPR001240 (HAMAP); IPR001240 (CDD); IPR011060 (SUPERFAMILY)	F:GO:0003824; F:GO:0004640; P:GO:0006568; P:GO:0008152	F:catalytic activity; F:phosphoribosylanthranilate isomerase activity; P:tryptophan metabolic process; P:metabolic process
HSK10604_c0_g1_i1	ultraviolet-B receptor UVR8	277	20	5.28233e-38	83.94						IPR009091 (G3DSA:2.130.10.GENE3D); IPR000408 (PROSITE_PROFILES); IPR009091 (SUPERFAMILY)	no GO terms	no GO terms
HSK10604_c0_g1_i2	ultraviolet-B receptor UVR8 isoform X2	699	20	2.92303e-81	80.33						IPR009091 (G3DSA:2.130.10.GENE3D); IPR000408 (PFAM); PTHR22870 (PANTHER); IPR000408 (PROSITE_PROFILES); IPR000408 (PROSITE_PROFILES); IPR009091 (SUPERFAMILY)	no GO terms	no GO terms
HSK10604_c0_g1_i3	ultraviolet-B receptor UVR8 isoform X1	467	20	2.48554e-67	81.73						IPR000408 (PFAM); IPR009091 (G3DSA:2.130.10.GENE3D); IPR000408 (PROSITE_PROFILES); IPR009091 (SUPERFAMILY)	no GO terms	no GO terms
HSK10604_c0_g2_i1	ultraviolet-B receptor UVR8	707	20	2.05059e-128	85.87						IPR000408 (PRINTS); IPR009091 (G3DSA:2.130.10.GENE3D); IPR009091 (G3DSA:2.130.10.GENE3D); IPR000408 (PFAM); PTHR22870 (PANTHER); PTHR22870:SF321 (PANTHER); IPR000408 (PROSITE_PROFILES); IPR000408 (PROSITE_PROFILES); IPR000408 (PROSITE_PROFILES); IPR009091 (SUPERFAMILY)	no GO terms	no GO terms
HSK10604_c0_g2_i2	ultraviolet-B receptor UVR8-like	612	20	1.43768e-92	85.09						IPR000408 (PRINTS); IPR009091 (G3DSA:2.130.10.GENE3D); IPR009091 (G3DSA:2.130.10.GENE3D); IPR000408 (PFAM); PTHR22870:SF321 (PANTHER); PTHR22870 (PANTHER); IPR000408 (PROSITE_PROFILES); IPR000408 (PROSITE_PROFILES); IPR009091 (SUPERFAMILY)	no GO terms	no GO terms
HSK10605_c0_g1_i1	GTP-binding protein SAR1A	779	20	3.48419e-112	99.17	5	F:GO:0005525; C:GO:0005783; C:GO:0005794; P:GO:0006886; P:GO:0016192	F:GTP binding; C:endoplasmic reticulum; C:Golgi apparatus; P:intracellular protein transport; P:vesicle-mediated transport			IPR006689 (PRINTS); IPR005225 (TIGRFAM); IPR006689 (PFAM); G3DSA:3.40.50.300 (GENE3D); PTHR11711 (PANTHER); PTHR11711:SF165 (PANTHER); IPR006687 (PROSITE_PROFILES); cd00879 (CDD); IPR027417 (SUPERFAMILY)	F:GO:0005525; C:GO:0005622; P:GO:0006886	F:GTP binding; C:intracellular; P:intracellular protein transport
HSK10606_c0_g1_i1	auxin-responsive protein IAA29	833	20	6.21683e-142	70.73	5	F:GO:0005515; C:GO:0005634; P:GO:0006355; P:GO:0009734; C:GO:0016021	F:protein binding; C:nucleus; P:regulation of transcription, DNA-templated; P:auxin-activated signaling pathway; C:integral component of membrane			IPR033389 (PFAM); G3DSA:3.10.20.90 (GENE3D); mobidb-lite (MOBIDB_LITE); IPR003311 (PANTHER); PTHR31734:SF44 (PANTHER); IPR000270 (PROSITE_PROFILES); SSF54277 (SUPERFAMILY)	F:GO:0005515; C:GO:0005634; P:GO:0006355	F:protein binding; C:nucleus; P:regulation of transcription, DNA-templated
HSK10607_c0_g1_i1	probable N-acetyltransferase HLS1	311	20	1.7055e-70	86.32	7	P:GO:0006475; P:GO:0017198; P:GO:0018002; C:GO:0022626; C:GO:0031415; F:GO:1990189; F:GO:1990190	P:internal protein amino acid acetylation; P:N-terminal peptidyl-serine acetylation; P:N-terminal peptidyl-glutamic acid acetylation; C:cytosolic ribosome; C:NatA complex; F:peptide-serine-N-acetyltransferase activity; F:peptide-glutamate-N-acetyltransferase activity	EC:2.3.1.88	Acyltransferases	PTHR43072:SF12 (PANTHER); PTHR43072 (PANTHER)	no GO terms	no GO terms
HSK10607_c0_g2_i1	probable N-acetyltransferase HLS1	487	20	7.51471e-83	89.83	7	P:GO:0006475; P:GO:0017198; P:GO:0018002; C:GO:0022626; C:GO:0031415; F:GO:1990189; F:GO:1990190	P:internal protein amino acid acetylation; P:N-terminal peptidyl-serine acetylation; P:N-terminal peptidyl-glutamic acid acetylation; C:cytosolic ribosome; C:NatA complex; F:peptide-serine-N-acetyltransferase activity; F:peptide-glutamate-N-acetyltransferase activity	EC:2.3.1.88	Acyltransferases	PTHR43072 (PANTHER); PTHR43072:SF12 (PANTHER)	no GO terms	no GO terms
HSK10608_c0_g1_i1	subtilisin-like protease SBT1.1	1433	20	0	85.35	3	F:GO:0004252; P:GO:0006508; C:GO:0016021	F:serine-type endopeptidase activity; P:proteolysis; C:integral component of membrane	EC:3.4.21	Acting on peptide bonds (peptidases)	G3DSA:3.50.30.30 (GENE3D); IPR003137 (PFAM); G3DSA:2.60.40.2310 (GENE3D); IPR000209 (PFAM); PTHR10795:SF387 (PANTHER); PTHR10795 (PANTHER); cd02120 (CDD); IPR036852 (SUPERFAMILY)	F:GO:0004252; P:GO:0006508	F:serine-type endopeptidase activity; P:proteolysis
HSK10610_c0_g1_i1	hypothetical protein CISIN_1g037359mg	257	1	3.37835e-06	82.14						no IPS match	no IPS match	no IPS match
HSK10610_c0_g2_i1	hypothetical protein CISIN_1g035265mg	216	1	2.75614e-23	83.33						no IPS match	no IPS match	no IPS match
HSK10611_c0_g1_i1	pentatricopeptide repeat-containing protein At4g21300-like	453	20	7.38477e-99	85.47	8	F:GO:0003723; F:GO:0004519; F:GO:0005515; F:GO:0008270; P:GO:0009451; C:GO:0016020; C:GO:0043231; P:GO:0090305	F:RNA binding; F:endonuclease activity; F:protein binding; F:zinc ion binding; P:RNA modification; C:membrane; C:intracellular membrane-bounded organelle; P:nucleic acid phosphodiester bond hydrolysis			IPR002885 (PFAM); IPR002885 (TIGRFAM); IPR011990 (G3DSA:1.25.40.GENE3D); IPR002885 (PFAM); PTHR24015:SF1648 (PANTHER); PTHR24015:SF1648 (PANTHER); PTHR24015 (PANTHER); PTHR24015 (PANTHER); IPR002885 (PROSITE_PROFILES); IPR002885 (PROSITE_PROFILES); IPR002885 (PROSITE_PROFILES)	F:GO:0005515	F:protein binding
HSK10612_c0_g1_i1	ethylene-responsive transcription factor ERF039-like	677	20	2.58844e-116	74.25	6	F:GO:0003677; F:GO:0003700; C:GO:0005634; C:GO:0005667; P:GO:0006355; P:GO:0006355	F:DNA binding; F:DNA binding transcription factor activity; C:nucleus; C:transcription factor complex; P:regulation of transcription, DNA-templated; P:regulation of transcription, DNA-templated			IPR001471 (PRINTS); IPR036955 (G3DSA:3.30.730.GENE3D); IPR001471 (PFAM); mobidb-lite (MOBIDB_LITE); PTHR31985 (PANTHER); IPR001471 (PROSITE_PROFILES); IPR001471 (CDD); IPR016177 (SUPERFAMILY)	F:GO:0003677; F:GO:0003700; P:GO:0006355	F:DNA binding; F:DNA binding transcription factor activity; P:regulation of transcription, DNA-templated
HSK10613_c0_g1_i1	E2F-associated phosphoprotein	284	20	2.52988e-49	87.18	3	C:GO:0005634; P:GO:0008284; P:GO:0034243	C:nucleus; P:positive regulation of cell proliferation; P:regulation of transcription elongation from RNA polymerase II promoter			IPR019370 (PFAM); mobidb-lite (MOBIDB_LITE); IPR019370 (PANTHER)	no GO terms	no GO terms
HSK10613_c0_g1_i2	E2F-associated phosphoprotein	519	20	5.84773e-117	84.33	3	C:GO:0005634; P:GO:0008284; P:GO:0034243	C:nucleus; P:positive regulation of cell proliferation; P:regulation of transcription elongation from RNA polymerase II promoter			IPR019370 (PFAM); mobidb-lite (MOBIDB_LITE); mobidb-lite (MOBIDB_LITE); IPR019370 (PANTHER)	no GO terms	no GO terms
HSK10613_c0_g1_i3	E2F-associated phosphoprotein	348	20	1.76508e-78	86.57	3	C:GO:0005634; P:GO:0008284; P:GO:0034243	C:nucleus; P:positive regulation of cell proliferation; P:regulation of transcription elongation from RNA polymerase II promoter			IPR019370 (PFAM); mobidb-lite (MOBIDB_LITE); IPR019370 (PANTHER)	no GO terms	no GO terms
HSK10614_c0_g1_i1	protein COFACTOR ASSEMBLY OF COMPLEX C SUBUNIT B CCB4, chloroplastic isoform X1	337	20	3.75353e-54	85.52	1	C:GO:0016021	C:integral component of membrane			IPR021325 (PFAM); PTHR34943:SF2 (PANTHER); PTHR34943 (PANTHER)	no GO terms	no GO terms
HSK10615_c0_g1_i1	Cell division cycle-associated 7-like protein	694	20	2.42314e-162	83.85	2	C:GO:0005634; P:GO:0051301	C:nucleus; P:cell division			IPR018866 (PFAM); mobidb-lite (MOBIDB_LITE); PTHR31169 (PANTHER); PTHR31169:SF5 (PANTHER)	no GO terms	no GO terms
HSK10615_c0_g2_i1	cell division cycle-associated protein 7	267	20	5.45818e-39	79.7	1	C:GO:0005634	C:nucleus			mobidb-lite (MOBIDB_LITE); PTHR31169 (PANTHER); PTHR31169:SF5 (PANTHER)	no GO terms	no GO terms
HSK10616_c0_g1_i1	AT-hook motif nuclear-localized protein 22-like	1230	20	1.91398e-135	84.62	6	F:GO:0003680; F:GO:0003700; C:GO:0005634; C:GO:0005667; P:GO:0006355; P:GO:0006355	F:AT DNA binding; F:DNA binding transcription factor activity; C:nucleus; C:transcription factor complex; P:regulation of transcription, DNA-templated; P:regulation of transcription, DNA-templated			G3DSA:3.30.1330.80 (GENE3D); IPR005175 (PFAM); IPR014476 (PIRSF); mobidb-lite (MOBIDB_LITE); mobidb-lite (MOBIDB_LITE); mobidb-lite (MOBIDB_LITE); PTHR31100 (PANTHER); PTHR31100:SF15 (PANTHER); IPR005175 (PROSITE_PROFILES); IPR005175 (CDD); SSF117856 (SUPERFAMILY)	no GO terms	no GO terms
HSK10616_c0_g1_i2	AT-hook motif nuclear-localized protein 22-like	1280	20	6.68614e-148	81.81	6	F:GO:0003680; F:GO:0003700; C:GO:0005634; C:GO:0005667; P:GO:0006355; P:GO:0006355	F:AT DNA binding; F:DNA binding transcription factor activity; C:nucleus; C:transcription factor complex; P:regulation of transcription, DNA-templated; P:regulation of transcription, DNA-templated			IPR005175 (PFAM); G3DSA:3.30.1330.80 (GENE3D); IPR014476 (PIRSF); mobidb-lite (MOBIDB_LITE); mobidb-lite (MOBIDB_LITE); mobidb-lite (MOBIDB_LITE); PTHR31100 (PANTHER); PTHR31100:SF15 (PANTHER); IPR005175 (PROSITE_PROFILES); IPR005175 (CDD); SSF117856 (SUPERFAMILY)	no GO terms	no GO terms
HSK10616_c0_g1_i3	AT-hook motif nuclear-localized protein 22-like	1312	20	1.36493e-134	84.62	6	F:GO:0003680; F:GO:0003700; C:GO:0005634; C:GO:0005667; P:GO:0006355; P:GO:0006355	F:AT DNA binding; F:DNA binding transcription factor activity; C:nucleus; C:transcription factor complex; P:regulation of transcription, DNA-templated; P:regulation of transcription, DNA-templated			IPR005175 (PFAM); IPR014476 (PIRSF); G3DSA:3.30.1330.80 (GENE3D); mobidb-lite (MOBIDB_LITE); mobidb-lite (MOBIDB_LITE); mobidb-lite (MOBIDB_LITE); PTHR31100:SF15 (PANTHER); PTHR31100 (PANTHER); IPR005175 (PROSITE_PROFILES); IPR005175 (CDD); SSF117856 (SUPERFAMILY)	no GO terms	no GO terms
HSK10616_c0_g2_i1	---NA---	203									mobidb-lite (MOBIDB_LITE)	no GO terms	no GO terms
HSK10617_c0_g1_i1	PREDICTED: uncharacterized protein LOC107174627	388	20	9.98965e-37	75.43						no IPS match	no IPS match	no IPS match
HSK10618_c0_g1_i1	---NA---	243									no IPS match	no IPS match	no IPS match
HSK10618_c0_g1_i2	---NA---	440									no IPS match	no IPS match	no IPS match
HSK10618_c0_g2_i1	---NA---	318									no IPS match	no IPS match	no IPS match
HSK10619_c0_g1_i1	probable transcription factor At5g28040	847	20	3.20839e-178	74.29	1	P:GO:0006355	P:regulation of transcription, DNA-templated			IPR007592 (PFAM); mobidb-lite (MOBIDB_LITE); PTHR31662 (PANTHER); PTHR31662:SF8 (PANTHER)	P:GO:0006355	P:regulation of transcription, DNA-templated
HSK10619_c0_g2_i1	hypothetical protein CUMW_076560	339	2	0.000115947	98.65	1	P:GO:0006355	P:regulation of transcription, DNA-templated			no IPS match	no IPS match	no IPS match
HSK10620_c0_g1_i1	Multicopper oxidase, type 1	249	20	1.24839e-16	84.22	5	F:GO:0005507; P:GO:0046274; C:GO:0048046; F:GO:0052716; P:GO:0055114	F:copper ion binding; P:lignin catabolic process; C:apoplast; F:hydroquinone:oxygen oxidoreductase activity; P:oxidation-reduction process	EC:1.10.3; EC:1.10.3.2	Acting on diphenols and related substances as donors; Laccase	no IPS match	no IPS match	no IPS match
HSK10620_c0_g1_i2	laccase, putative	396	20	1.03679e-50	75.91	5	F:GO:0005507; C:GO:0005576; C:GO:0016020; F:GO:0016491; P:GO:0055114	F:copper ion binding; C:extracellular region; C:membrane; F:oxidoreductase activity; P:oxidation-reduction process			IPR008972 (G3DSA:2.60.40.GENE3D); IPR011706 (PFAM); PTHR11709 (PANTHER); PTHR11709:SF204 (PANTHER); IPR008972 (SUPERFAMILY)	F:GO:0005507; F:GO:0016491; P:GO:0055114	F:copper ion binding; F:oxidoreductase activity; P:oxidation-reduction process
HSK10620_c0_g2_i1	laccase-17-like	224	20	6.21504e-34	98.11	5	F:GO:0005507; P:GO:0046274; C:GO:0048046; F:GO:0052716; P:GO:0055114	F:copper ion binding; P:lignin catabolic process; C:apoplast; F:hydroquinone:oxygen oxidoreductase activity; P:oxidation-reduction process	EC:1.10.3; EC:1.10.3.2	Acting on diphenols and related substances as donors; Laccase	no IPS match	no IPS match	no IPS match
HSK10621_c0_g1_i1	---NA---	317									no IPS match	no IPS match	no IPS match
HSK10621_c0_g2_i1	---NA---	256									no IPS match	no IPS match	no IPS match
HSK10622_c0_g1_i1	G-type lectin S-receptor-like serine/threonine-protein kinase RLK1	844	20	3.81395e-84	85.29	8	F:GO:0004674; F:GO:0005524; C:GO:0005886; P:GO:0006468; P:GO:0009069; C:GO:0016021; F:GO:0030246; P:GO:0048544	F:protein serine/threonine kinase activity; F:ATP binding; C:plasma membrane; P:protein phosphorylation; P:serine family amino acid metabolic process; C:integral component of membrane; F:carbohydrate binding; P:recognition of pollen	EC:2.7.11	Transferring phosphorus-containing groups	G3DSA:1.10.510.10 (GENE3D); IPR001245 (PFAM); PTHR27002 (PANTHER); PTHR27002:SF110 (PANTHER); IPR011009 (SUPERFAMILY)	F:GO:0004672; P:GO:0006468	F:protein kinase activity; P:protein phosphorylation
HSK10623_c0_g1_i1	protein Iojap-related, mitochondrial	884	20	7.70777e-123	88.1	4	C:GO:0005739; P:GO:0017148; F:GO:0043023; P:GO:0090071	C:mitochondrion; P:negative regulation of translation; F:ribosomal large subunit binding; P:negative regulation of ribosome biogenesis			IPR004394 (TIGRFAM); G3DSA:3.30.460.10 (GENE3D); PF02410 (PFAM); PTHR21043:SF0 (PANTHER); IPR004394 (PANTHER); IPR004394 (HAMAP); SSF81301 (SUPERFAMILY)	no GO terms	no GO terms
HSK10624_c0_g1_i1	thioredoxin reductase NTRB-like	1671	20	0	92.38	6	F:GO:0004791; C:GO:0005737; P:GO:0006118; P:GO:0006206; P:GO:0019430; P:GO:0055114	F:thioredoxin-disulfide reductase activity; C:cytoplasm; P:obsolete electron transport; P:pyrimidine nucleobase metabolic process; P:removal of superoxide radicals; P:oxidation-reduction process	EC:1.8.1.9	Thioredoxin-disulfide reductase	PR00368 (PRINTS); IPR000103 (PRINTS); IPR023753 (PFAM); IPR036188 (G3DSA:3.50.50.GENE3D); IPR005982 (TIGRFAM); IPR036188 (G3DSA:3.50.50.GENE3D); PTHR42863:SF9 (PANTHER); PTHR42863 (PANTHER); IPR036188 (SUPERFAMILY)	F:GO:0004791; C:GO:0005737; F:GO:0016491; P:GO:0019430; P:GO:0055114	F:thioredoxin-disulfide reductase activity; C:cytoplasm; F:oxidoreductase activity; P:removal of superoxide radicals; P:oxidation-reduction process
[truncated: 316,360+ more rows]
